# Supplementary material
Source: PubMed Central journal article supplement (PMC3861704)

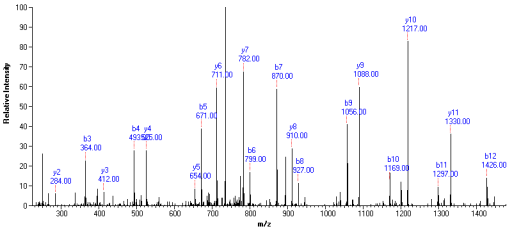

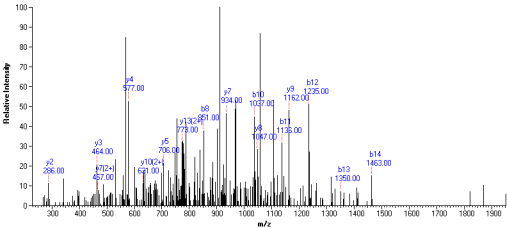

Peptide: \_AAAMANK(ac)ELQTIPIK(I)\_Charge:2+\_m/z:772.43\_MassError:0.89785399ppm\_RetentionTime:19.076min\_MascotScore:90.48

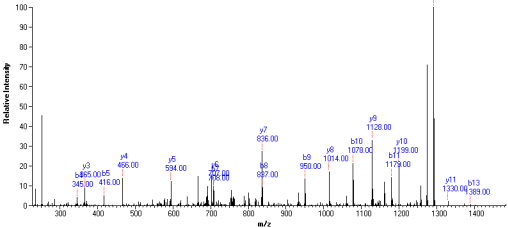

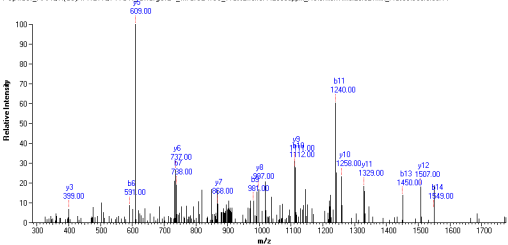

Peptide: \_AAATGEALSLVCVDEHK(Δc)LLR\_Charge: 2+\_m/z: 1107.09\_MassError: -0.64133702ppm\_RetentionTime: 40.068min\_MaxCotScore: 75.71

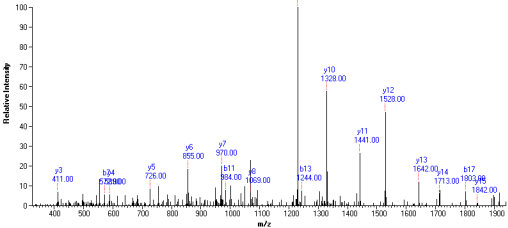

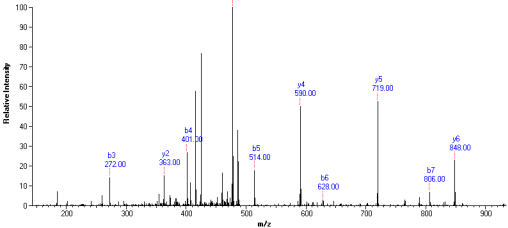

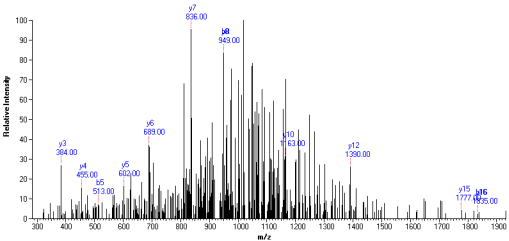

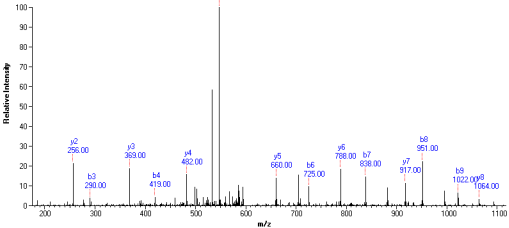



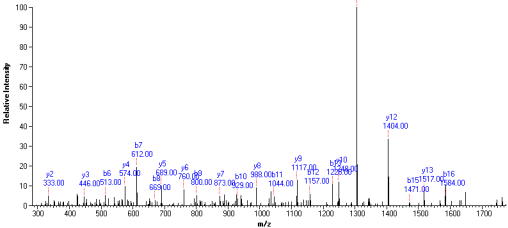

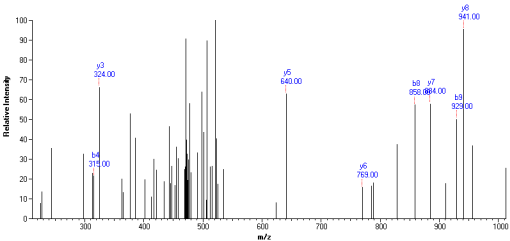

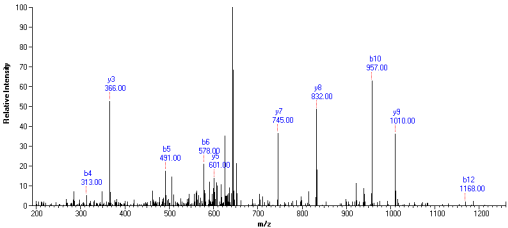

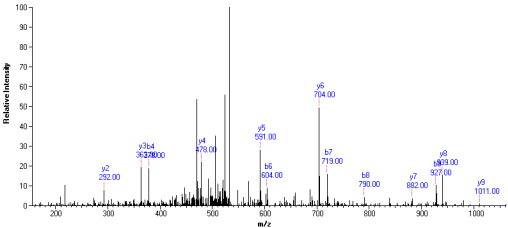

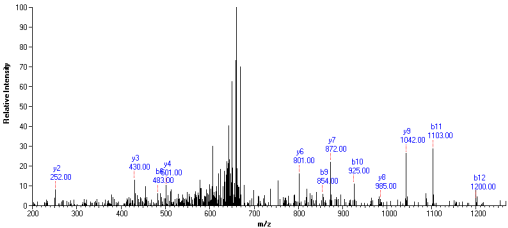

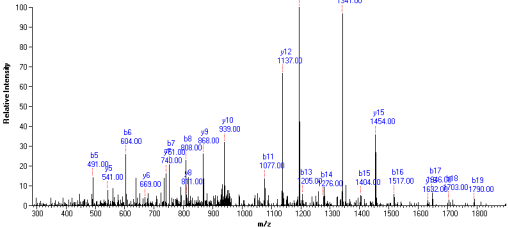

Peptide: \_AAGSLVK(ac)R\_Charge: 2+\_m/z: 431.27\_MassError: 2.5307132ppm\_RetentionTime: 11.262min\_MascotScore: 82.16

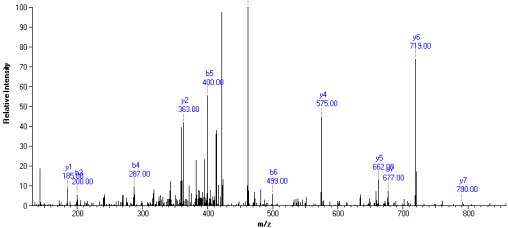

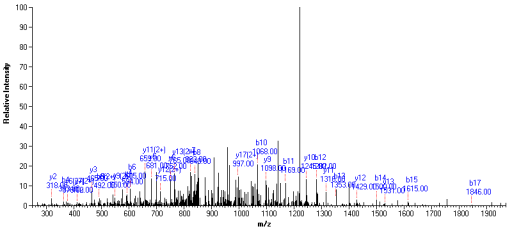



Peptide: \_AAIEAK(ac)MQELAQVSDK(Iy)\_Charge:2+\_m/z:901.99\_MassError:1.0902442ppm\_RetentionTime:38.763min\_MascotScore:71.33

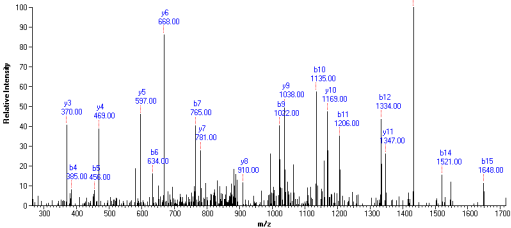

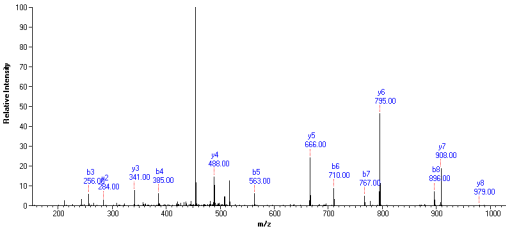

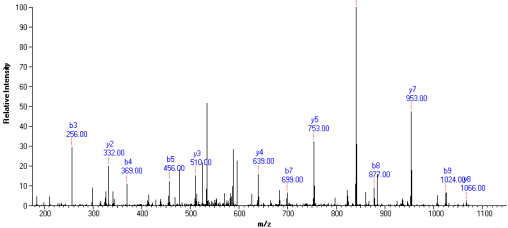

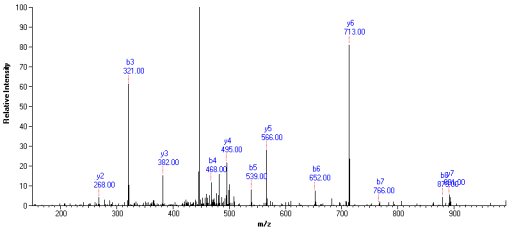

Peptide: \_AAK(ac)IIDGK(Iy)\_Charge: 2+\_m/z: 437.27\_MassError: 1.6401187ppm\_RetentionTime: 11.547min\_MascotScore: 40.32

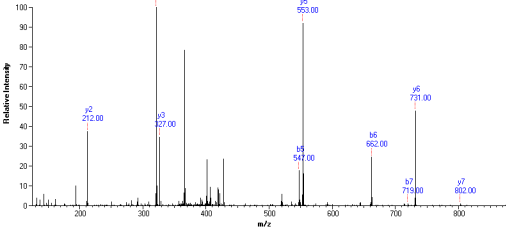

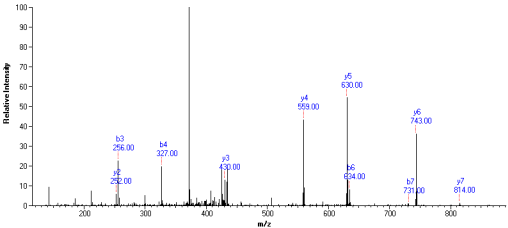

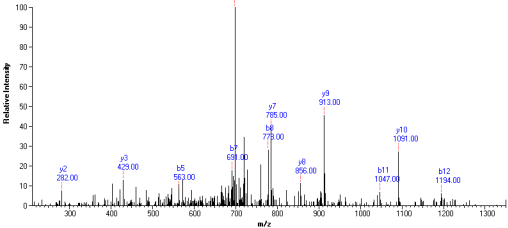

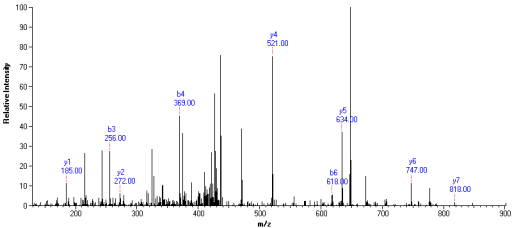



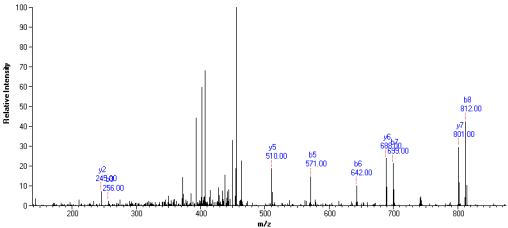

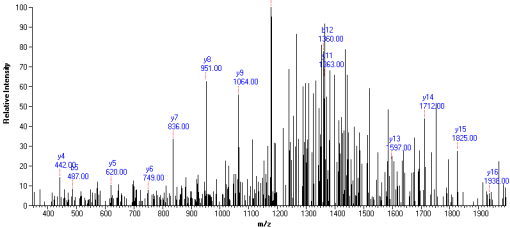

Peptide: \_AANK(ac)FPALIIYG GK(Iy)\_Charge: 2+\_m/z: 704.4\_MassError: 0.68440953 ppm\_RetentionTime: 33.519min\_MascotScore: 34.13

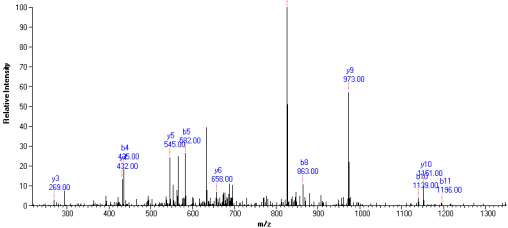

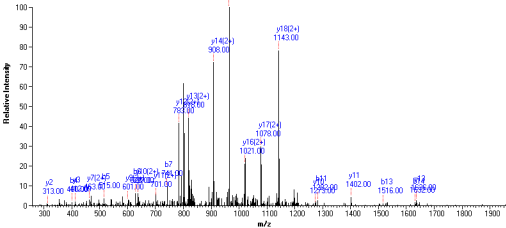

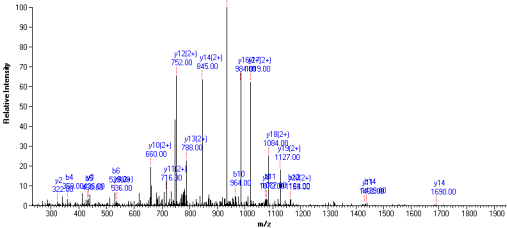

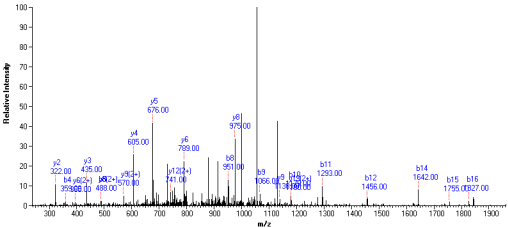

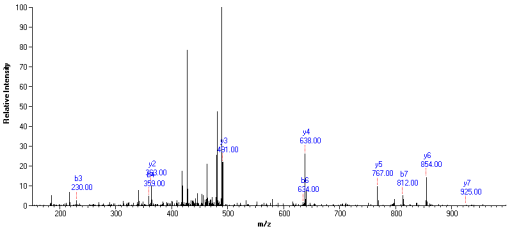

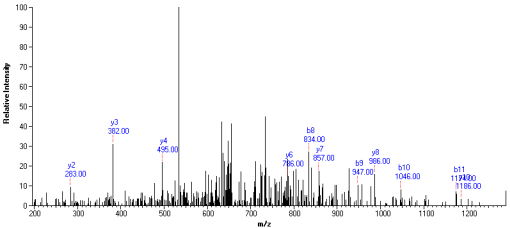



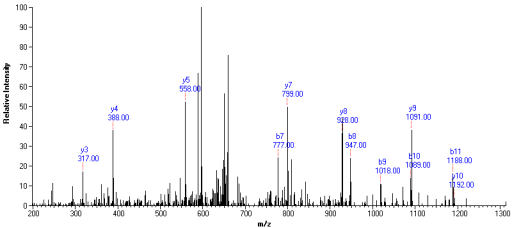

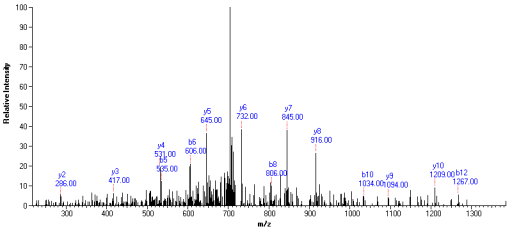

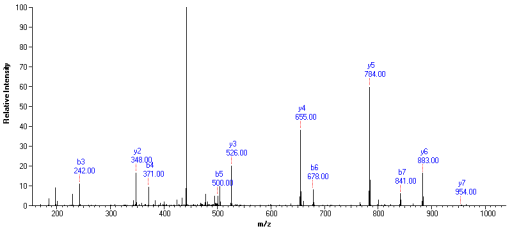

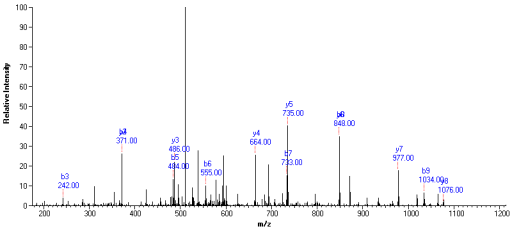

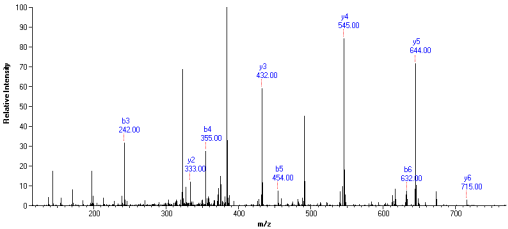

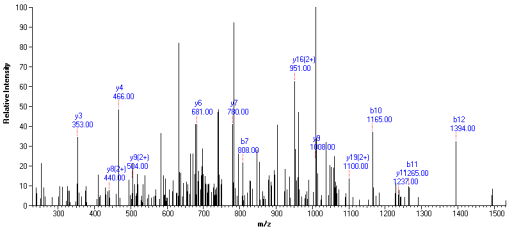

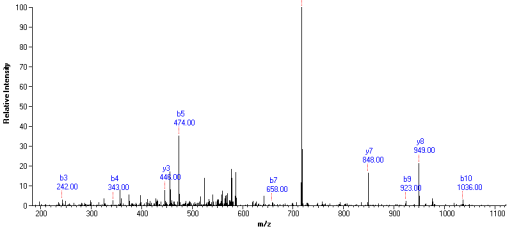

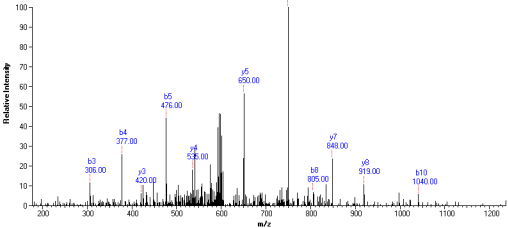



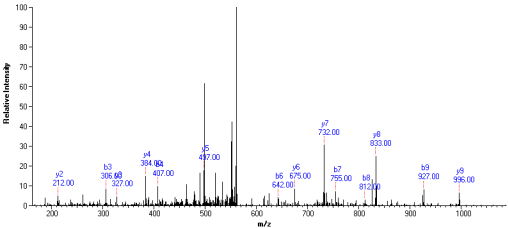

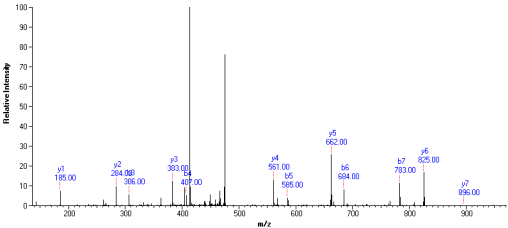

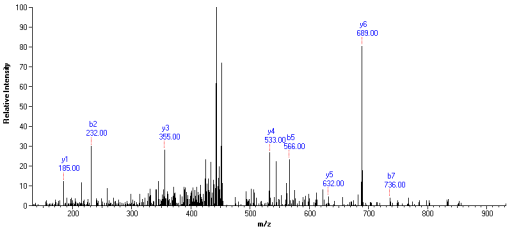

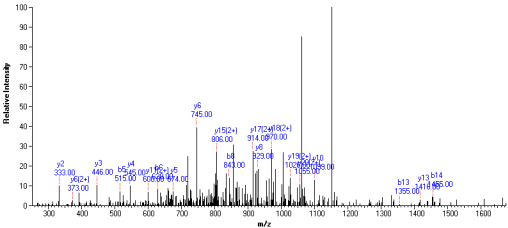

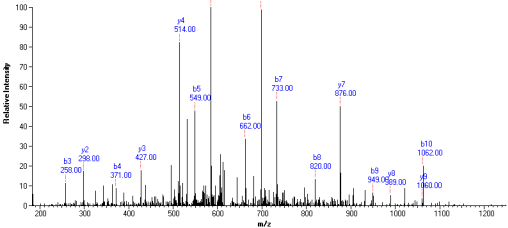

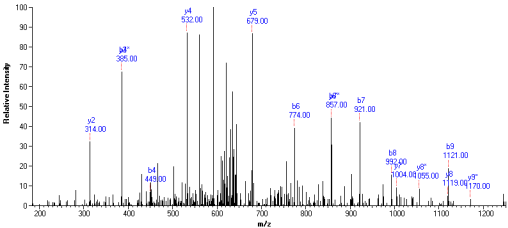

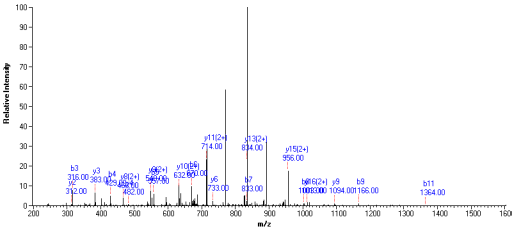

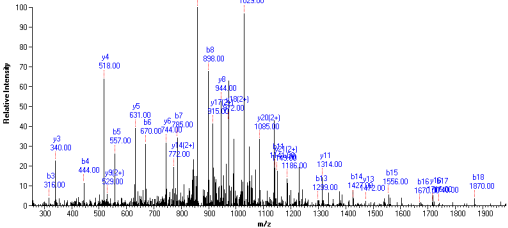



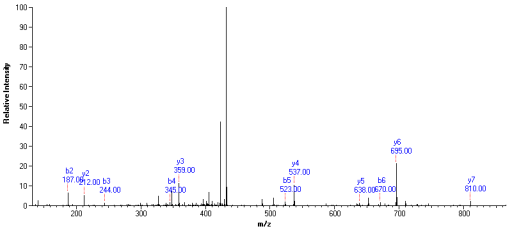

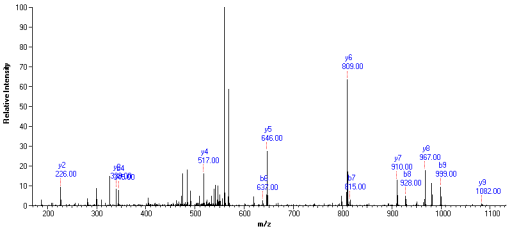

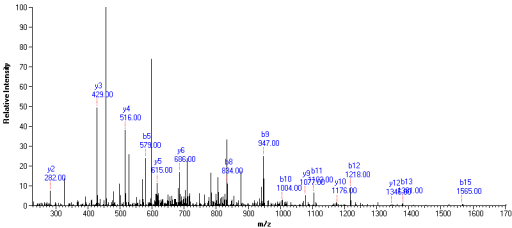

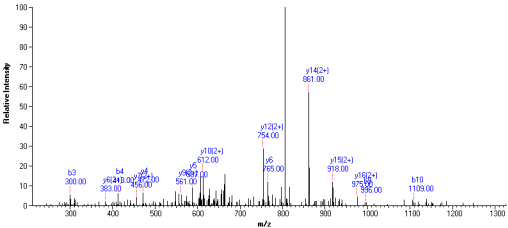

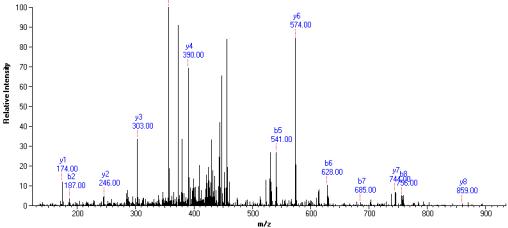

Peptide: \_ADK(ac)WGAR\_Charge: 2+\_m/z: 432.23\_MassError:0.49632345ppm\_RetentionTime:12.94min\_MascotScore:63.52

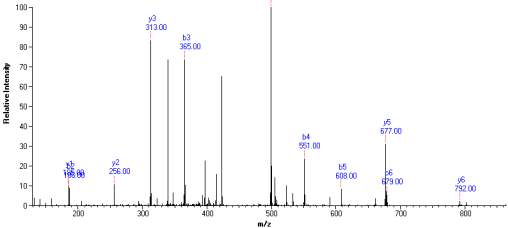

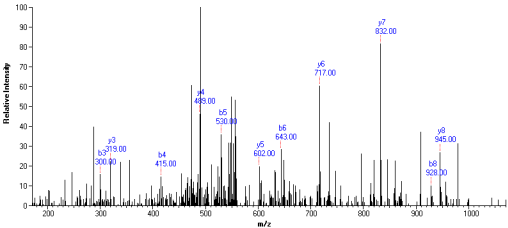

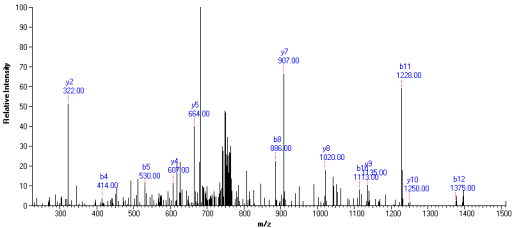



Peptide: \_ADLNVPVK(ac)DGK(Iy)\_Charge:2+\_m/z: 607.34\_MassError:-0.20891307ppm\_RetentionTime:20.597min\_MascotScore:29.32

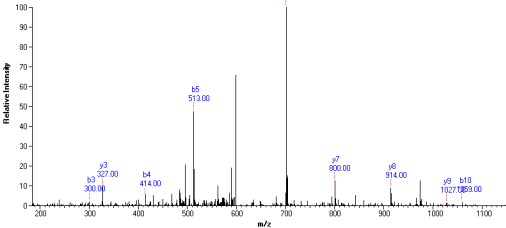

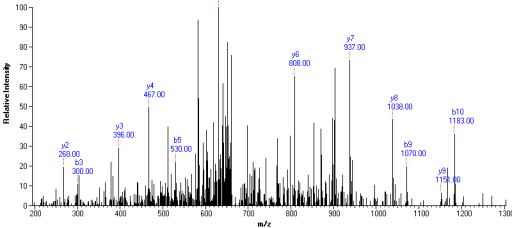

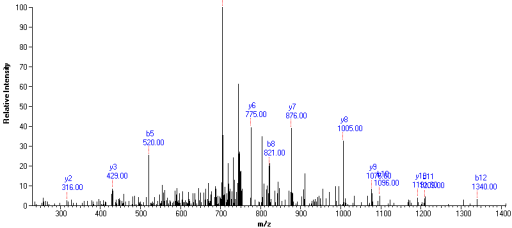

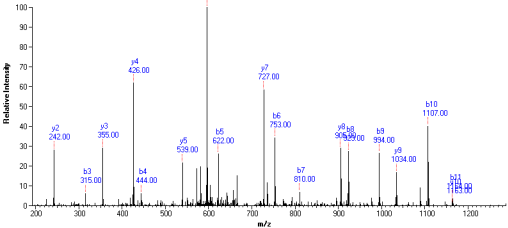

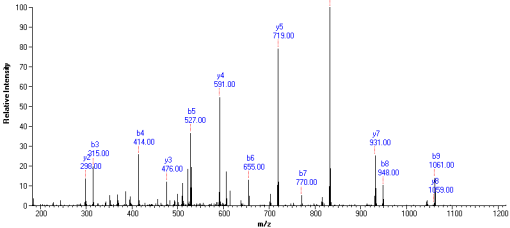

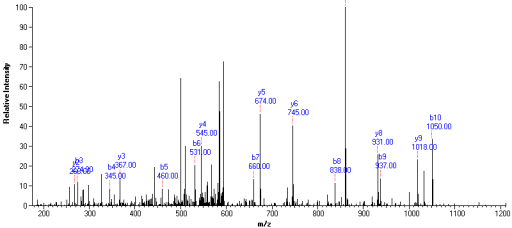

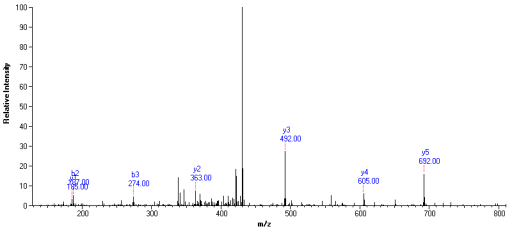

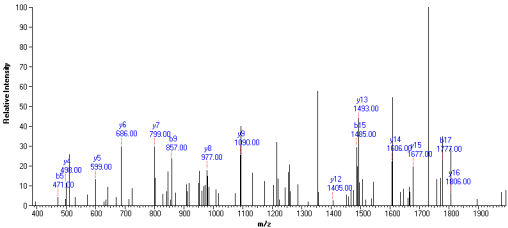



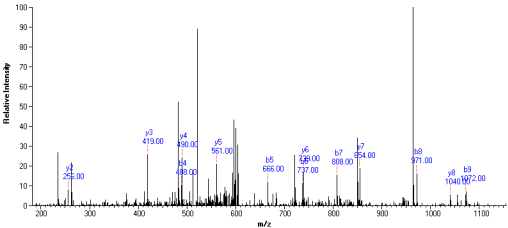

Peptide: \_AEAAPAATGGGIPGMLPWPK(ac)YDFSK(Iy)\_Charge:3+\_m/z: 843.11\_MassError:2.1547067ppm\_RetentionTime:40.858min\_MascotScore:31.01

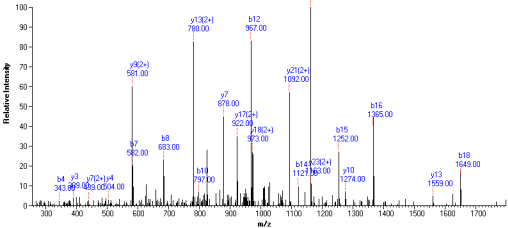

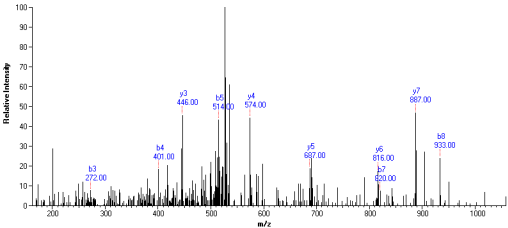

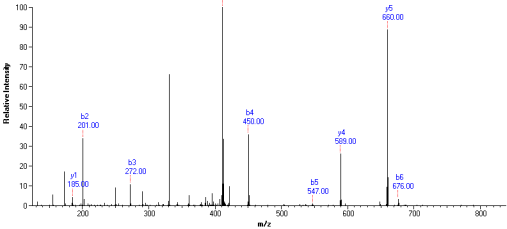

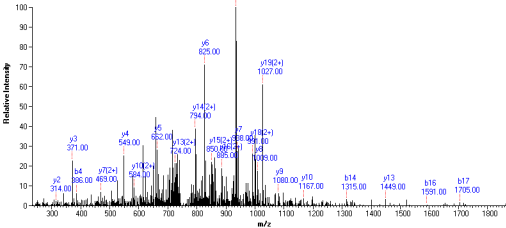

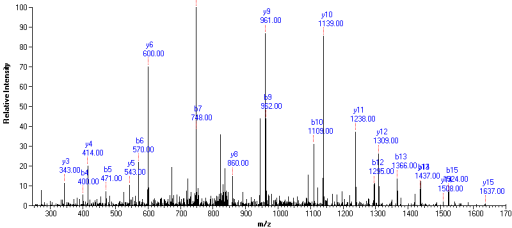

Peptide: \_AEDPQK(ac)LVR\_Charge: 2+\_m/z: 558.31\_MassError: -1.3402366ppm\_RetentionTime: 17.316min\_MascotScore: 34.44

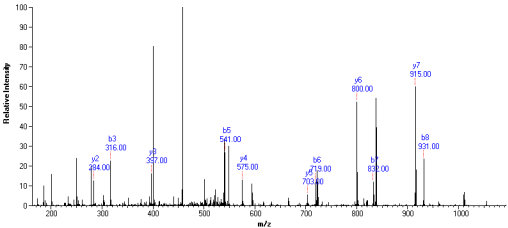

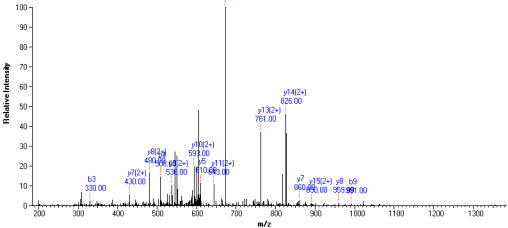



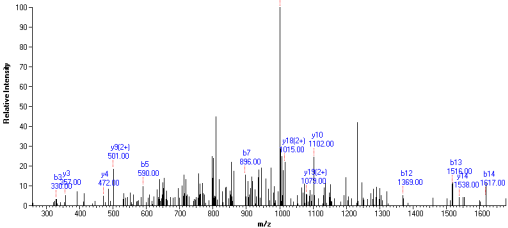

Peptide: \_AEEITFSK(ac)IIIR\_Charge: 2+\_m/z: 683.89\_MassError: 0.41194072ppm\_RetentionTime: 40.339min\_MascotScore: 72.18

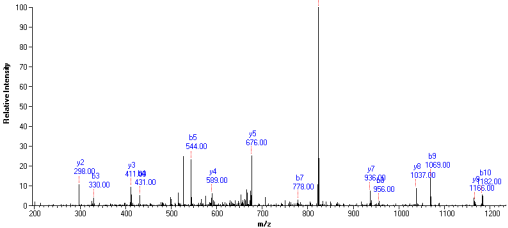

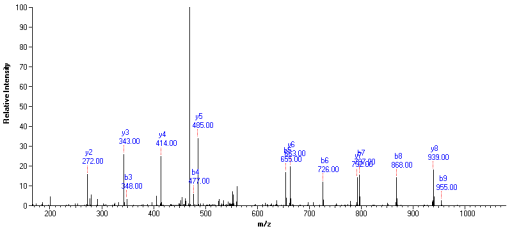

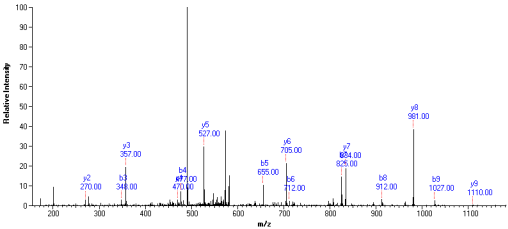

Peptide: \_AEFIEK(ac)YR\_Charge: 2+\_m/z: 526.3\_MassError: 0.74581618ppm\_RetentionTime: 17.754min\_MascotScore: 41.07

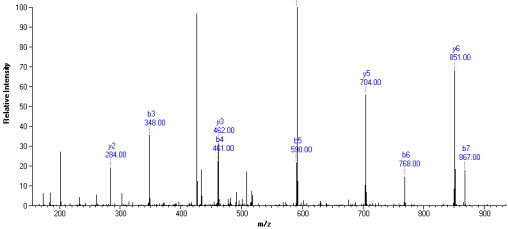

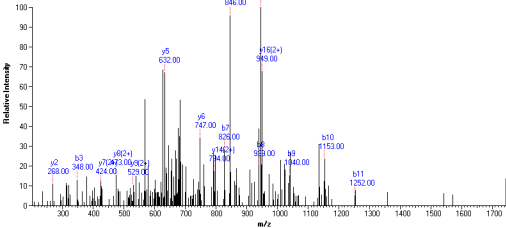

Peptide: \_AEGK(ac)DYIVK(Iy)\_Charge: 2+\_m/z: 540.8\_MassError: 1.5499225ppm\_RetentionTime: 12.905min\_MascotScore: 42.79

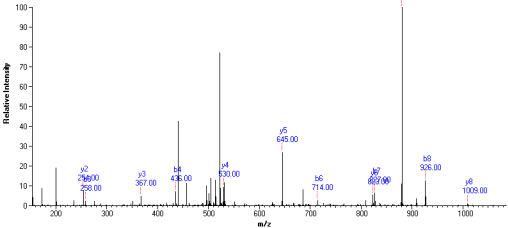

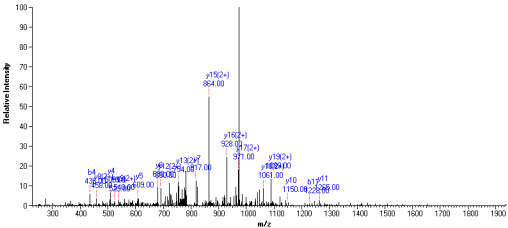



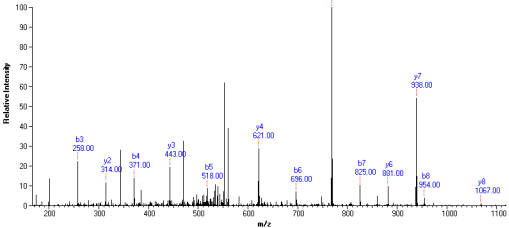

Peptide: \_AEIEK(ac)M(ox)GLPILTEGK(Iy)\_Charge: 2+\_m/z: 851.97\_MassError: 0.63162076ppm\_RetentionTime: 33.971min\_MascotScore: 41.14

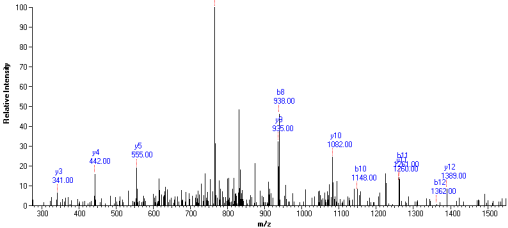

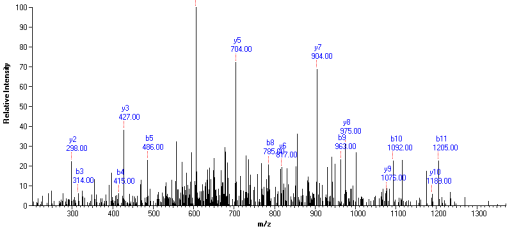

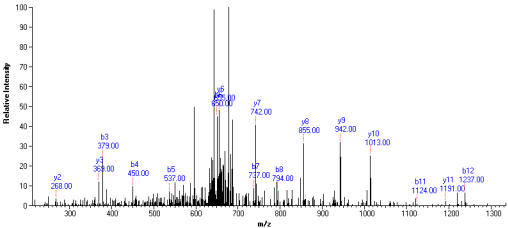

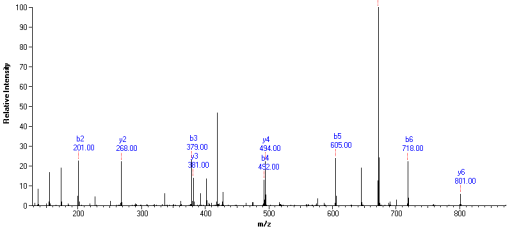

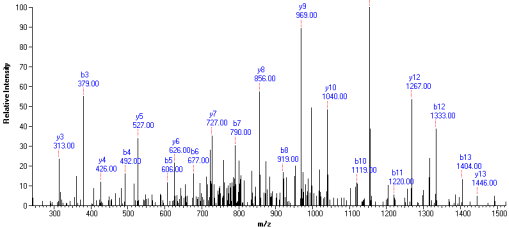

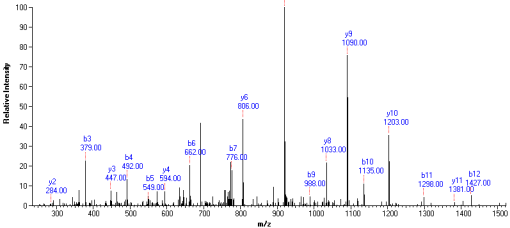

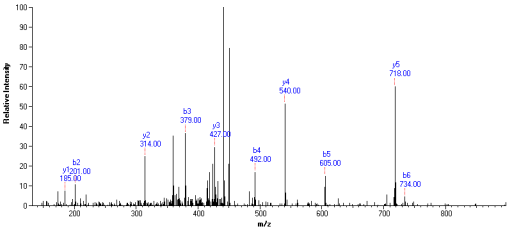



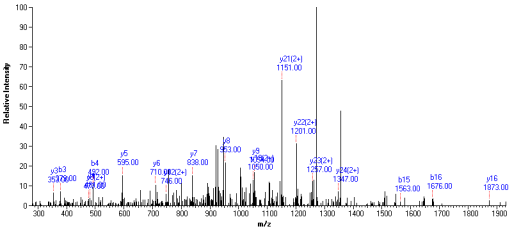

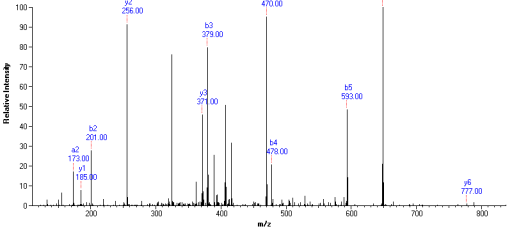

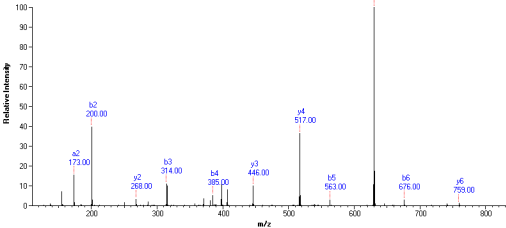

Peptide: \_AELALLK(ac)ER\_Charge: 2+\_m/z: 551.84\_MassError: 3.9664326ppm\_RetentionTime: 28.814min\_MascotScore: 40.73

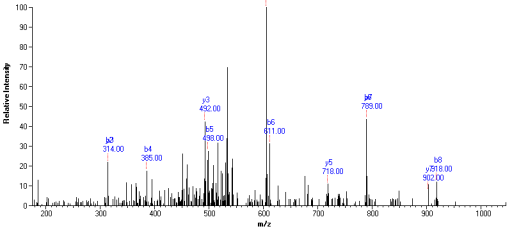

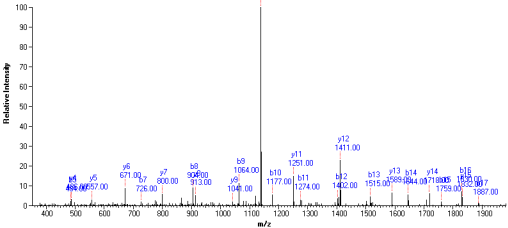

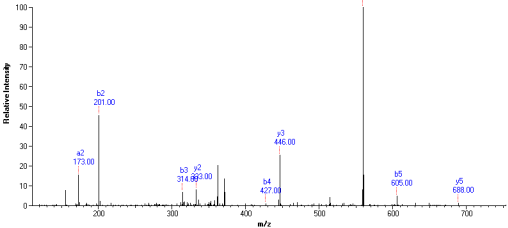

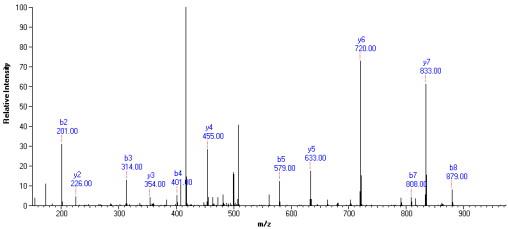

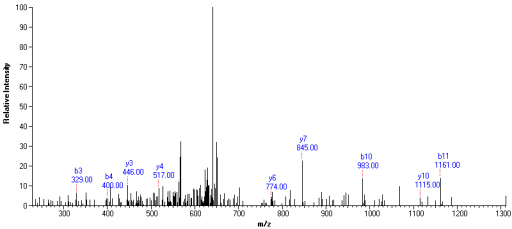



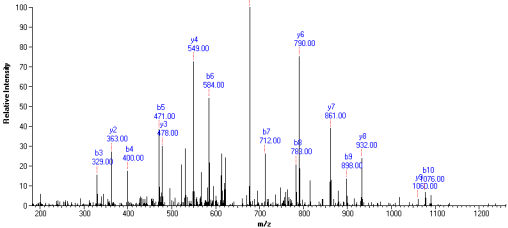

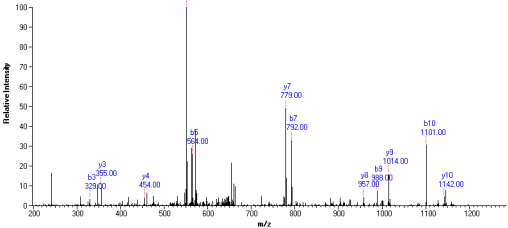

Peptide: \_AETAEK(ac)YGDEQVK(l)  
Charge: 2+  
m/z: 763.37  
MassError: 1.0370935ppm  
RetentionTime: 15.191min  
MascotScore: 85.26

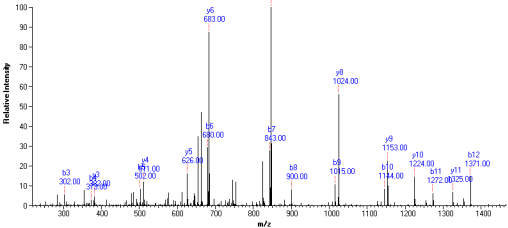

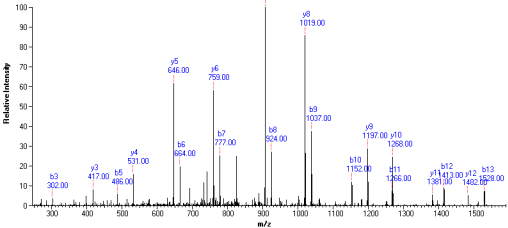

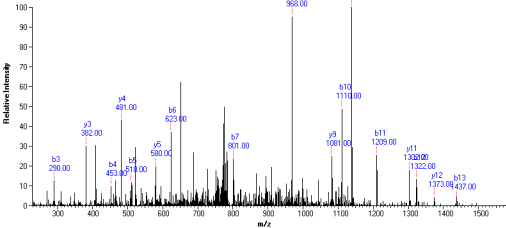

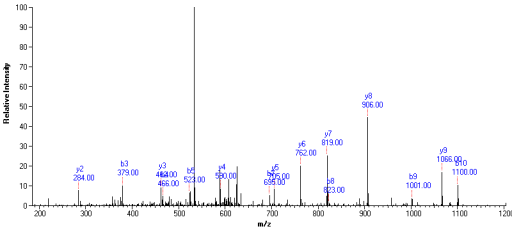

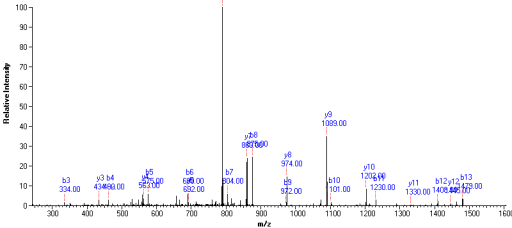

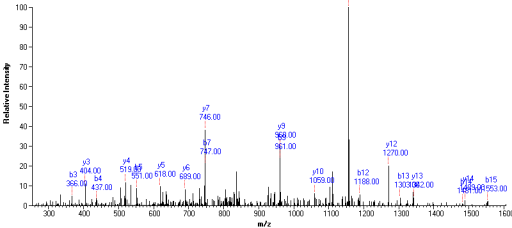



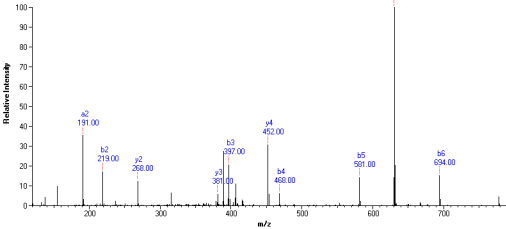

Peptide: \_AFLK(ac)TVTSQPGVYR\_Charge: 2+\_m/z: 813.95\_MassError: 2.9748849ppm\_RetentionTime: 27.809min\_MascotScore: 29.95

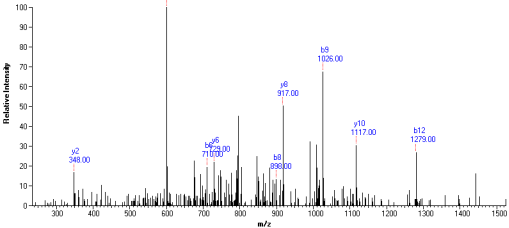

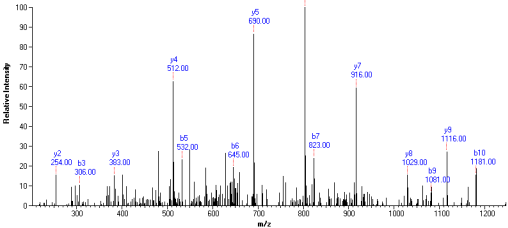

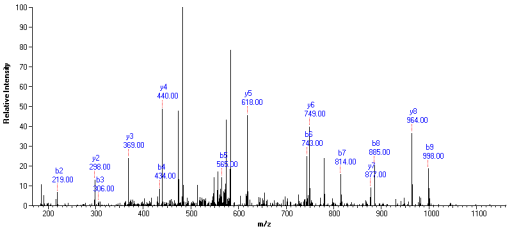

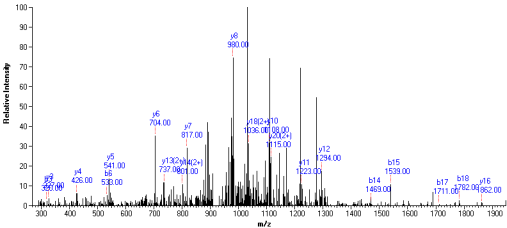

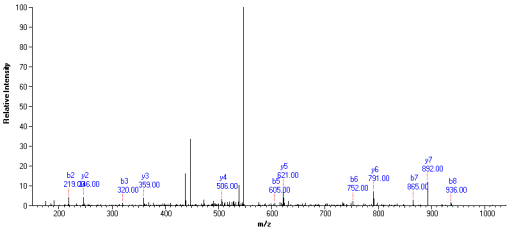

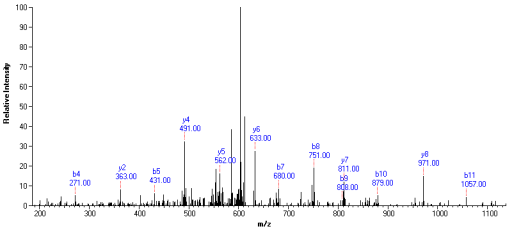

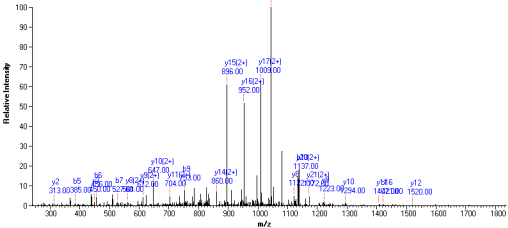



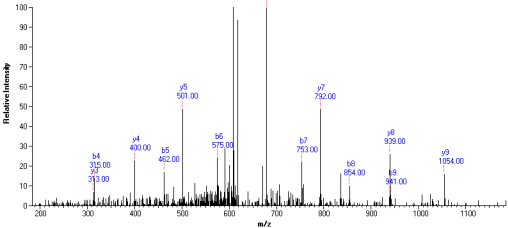

Peptide: \_AGAGTDAAID SLK(ac)PYLDK(Iy) Charge: 2+  $m/z$ : 932.49\_MassError: 1.4978506ppm\_RetentionTime: 38.905min\_MascotScore: 70.14

Relative Intensity

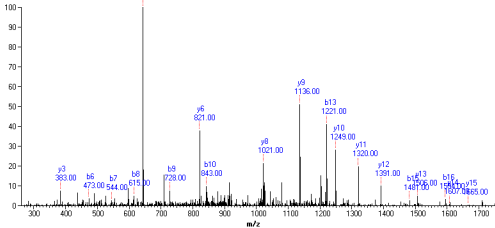

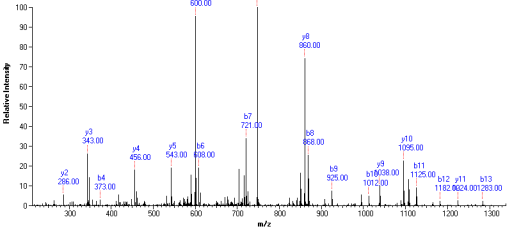

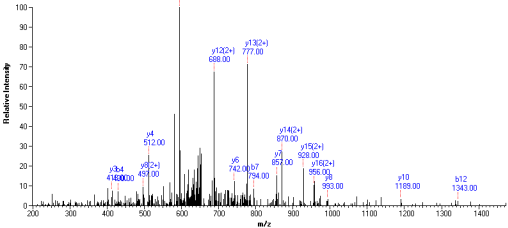

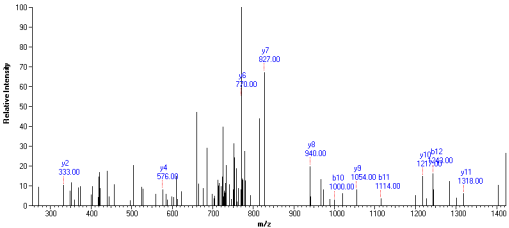

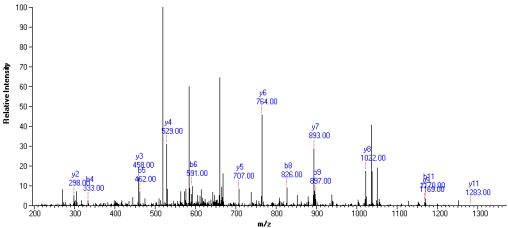

Peptide: \_AGGVK(ac)NVNSK(Iy)\_Charge: 2+\_m/z: 508.81\_MassError: -0.43865275ppm\_RetentionTime: 7.4462min\_MascotScore: 58.18

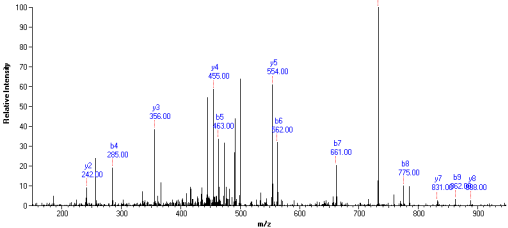

Peptide: \_AGLK[ac]YTLPR\_Charge:2+\_m/z: 507.82\_MassError:0.57849193ppm\_RetentionTime:24.136min\_MascotScore:39.55

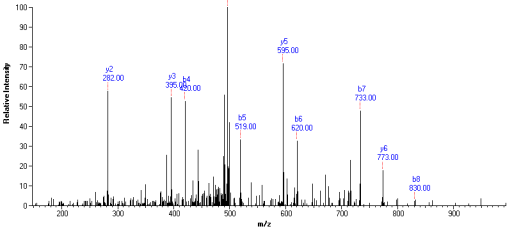



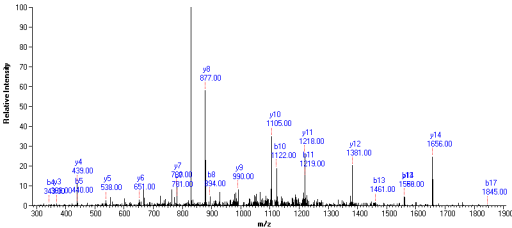

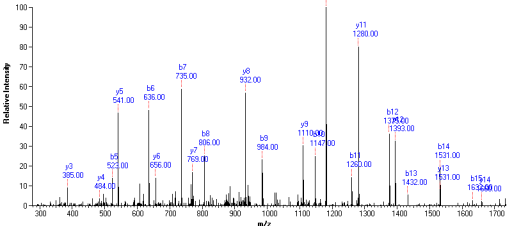

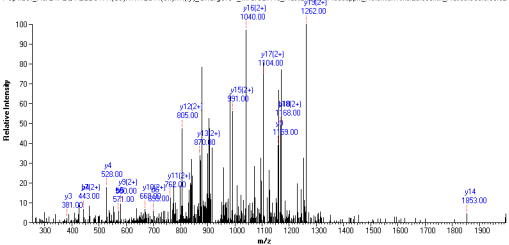

Relative Intensity

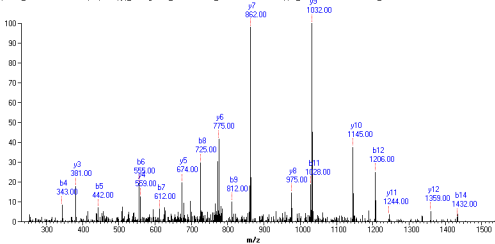

Peptide: \_AGVDVLGISTDK(Iy)PEK(ac)LSR\_Charge: 3+\_m/z: 651.7\_MassError: 1.0232864ppm\_RetentionTime: 25.507min\_MascotScore: 53.51

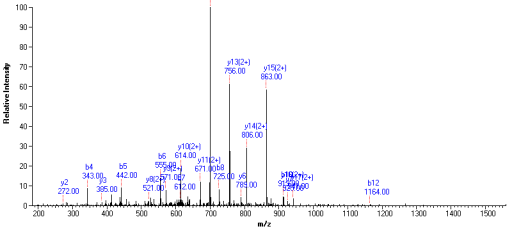

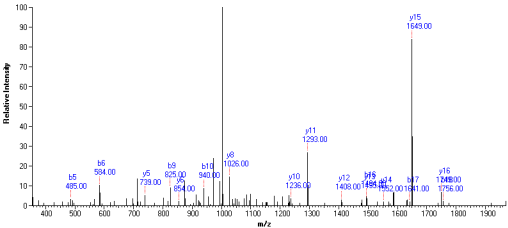

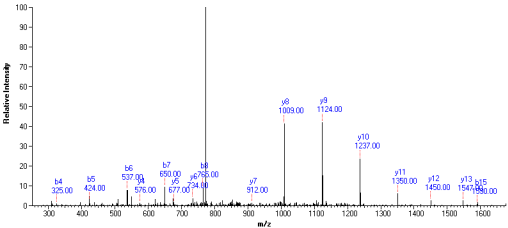

Peptide: \_AGVYDK(ac)NK(Iy)\_ Charge: 2+ \_m/z: 476.76 \_MassError: 1.4744084ppm \_RetentionTime: 10.399min \_MascotScore: 47.35

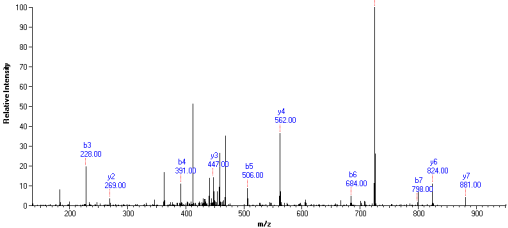



Peptide: \_AGYAEDEVVAVSK(ac)LGDIEYR\_Charge: 3+ m/z: 748.71\_MassError:0.36088727ppm\_RetentionTime:44.607min\_MascotScore:50.03

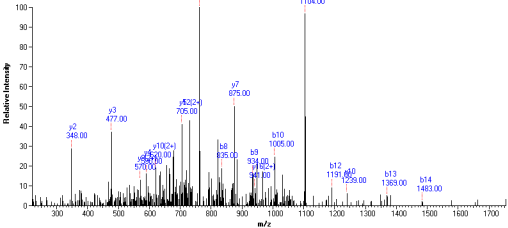

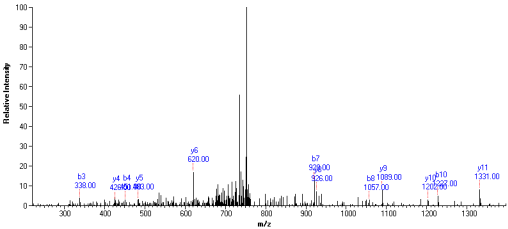

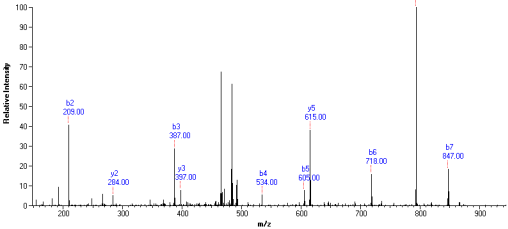

Peptide: \_AIAEQLK(ac)YTGNK(Iy)\_Charge:2+\_m/z: 697.39\_MassError:0.91115438ppm\_RetentionTime:20.234min\_MascotScore:90.18

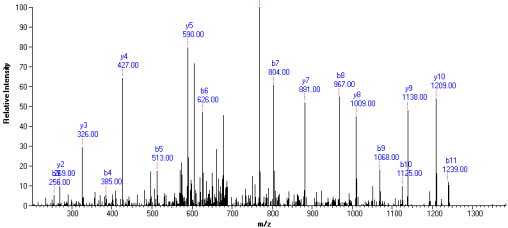

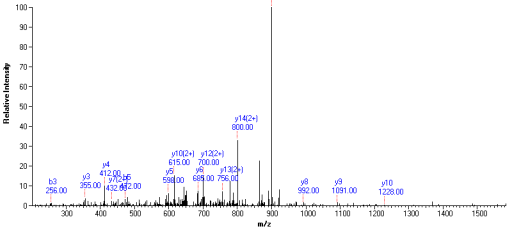

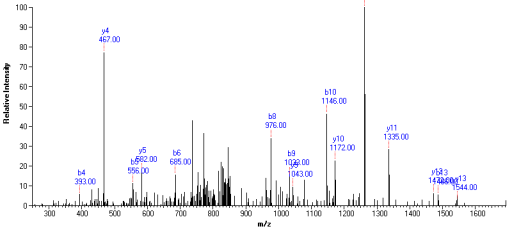

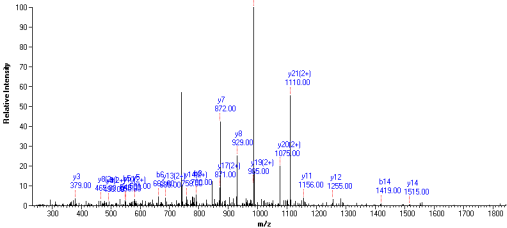

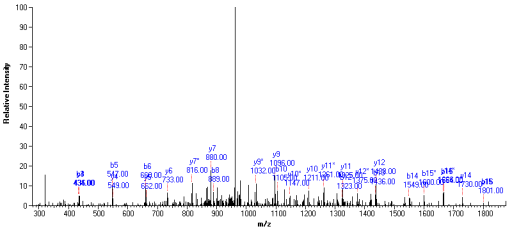



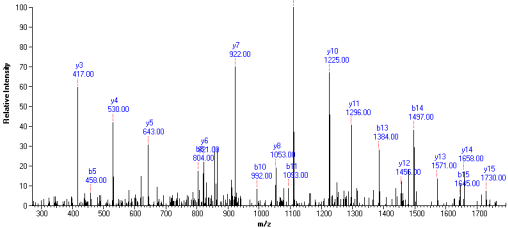

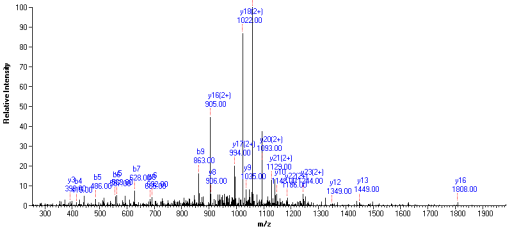

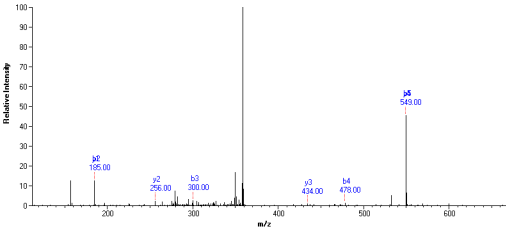

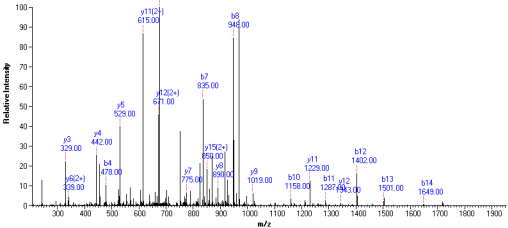

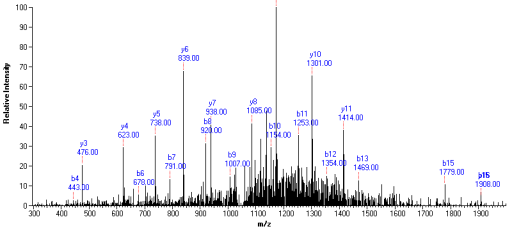

Peptide: \_AIGEYTDVYVEK(ac)EMVTFEDR\_Charge:3+\_m/z: 758.7\_MassError:5.8278337ppm\_RetentionTime:50.155min\_MascotScore:48.82

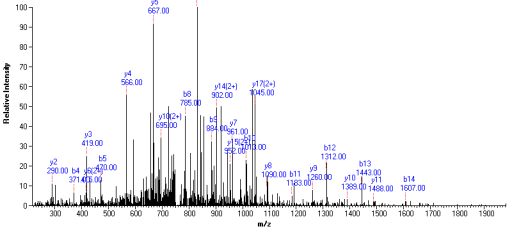

Peptide: \_AIGVEK(ac)R\_Charge: 2+\_m/z: 416.75\_MassError: 1.8362511ppm\_RetentionTime: 12.313min\_MascotScore: 25.16

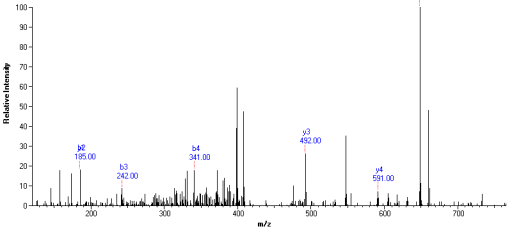

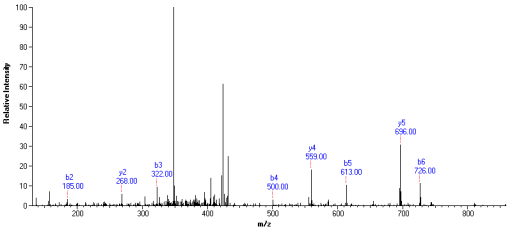



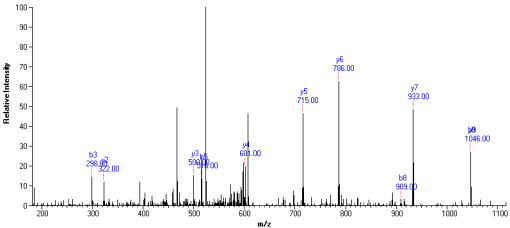

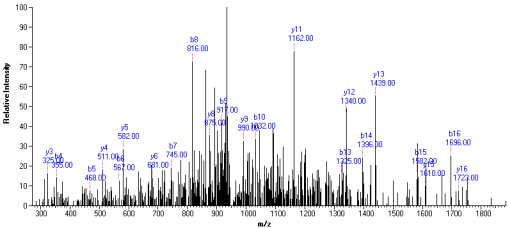

Peptide: \_AIK(ac)LVR\_Charge: 2+\_m/z: 380.26\_MassError: 1.4761374ppm\_RetentionTime: 14.7min\_MascotScore: 42.39

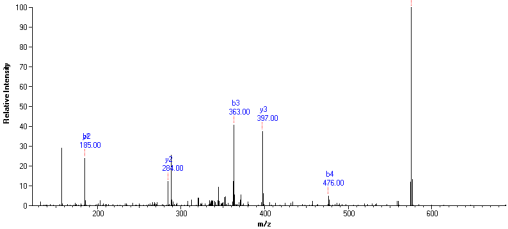

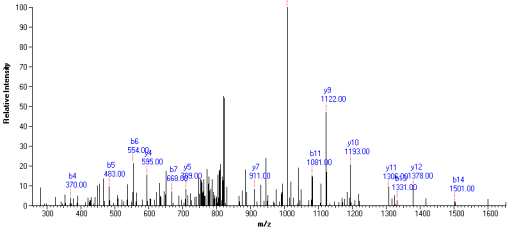

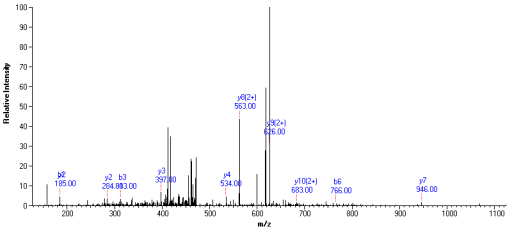

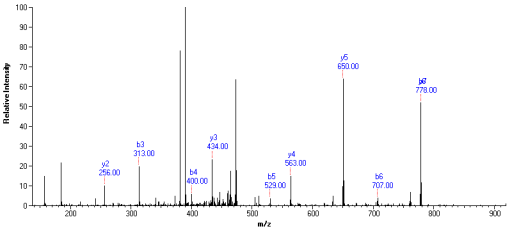

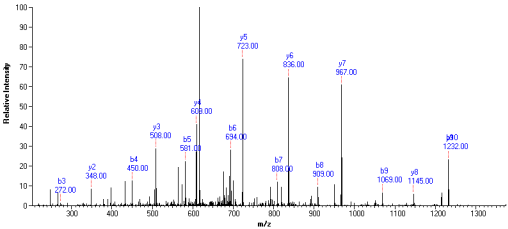

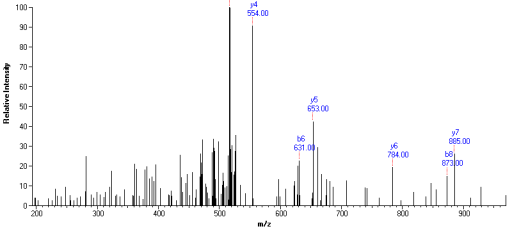



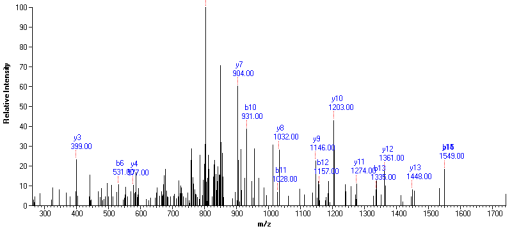

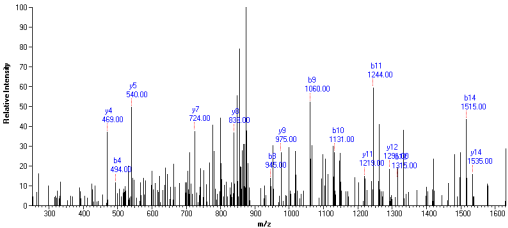

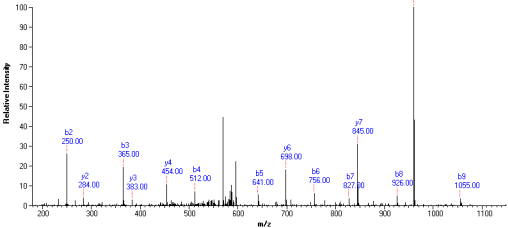

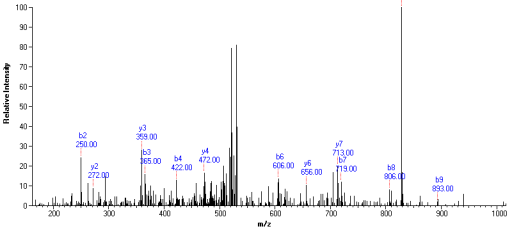

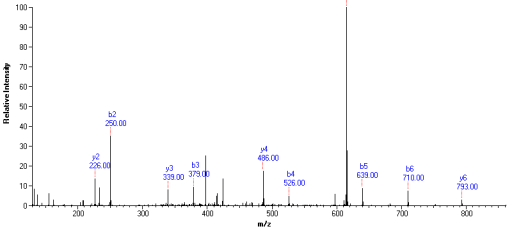

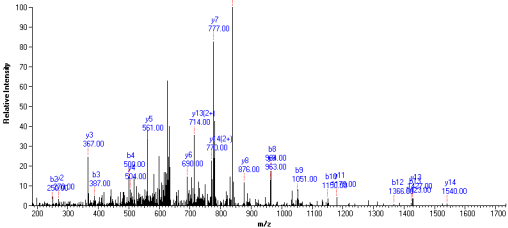

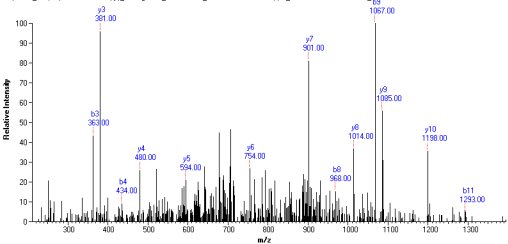

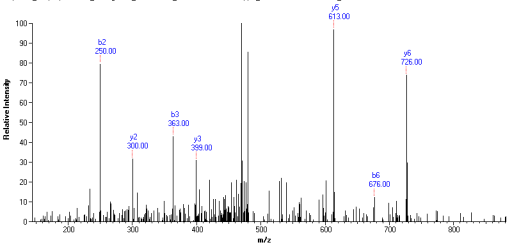



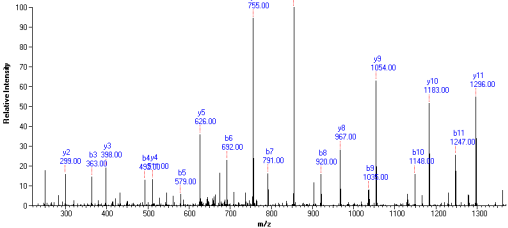

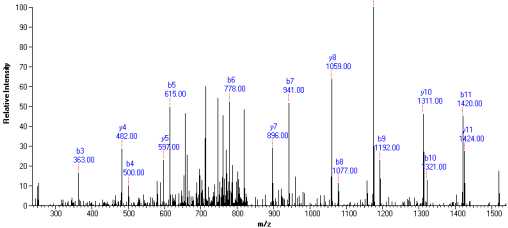

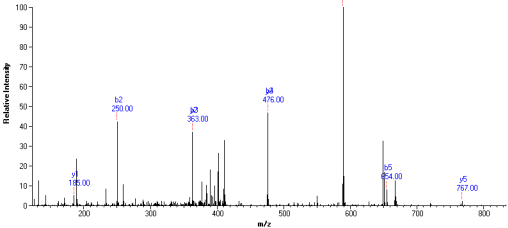

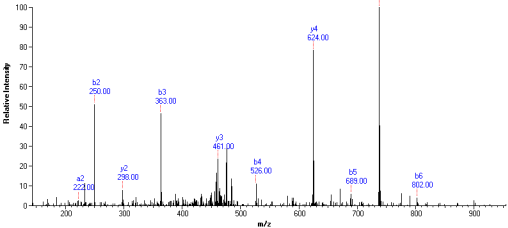

Peptide: \_AK[ac]PVLLLEPIM(ox)K(Iy)\_Charge: 2+\_m/z: 656.9\_MassError: 1.6415042ppm\_RetentionTime: 28.432min\_MascotScore: 33.33

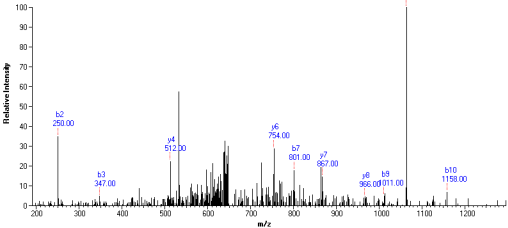

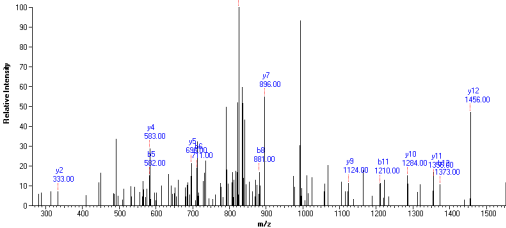

Peptide: \_AK[ac]VSLEK[ly]\_ Charge: 2+ \_m/z: 416.76 \_MassError: 0.21666122ppm \_RetentionTime: 12.842min \_MascotScore: 35.46

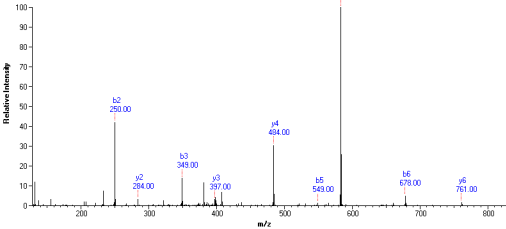

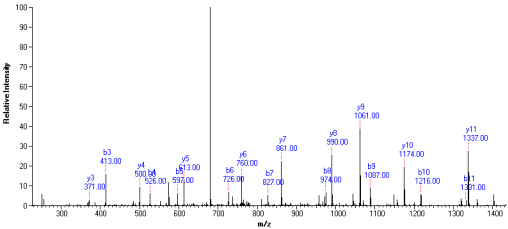



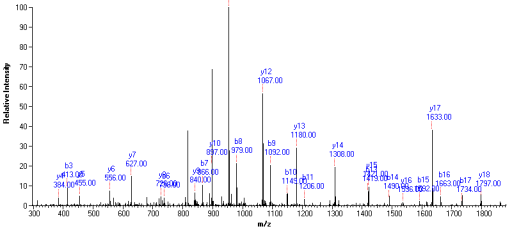

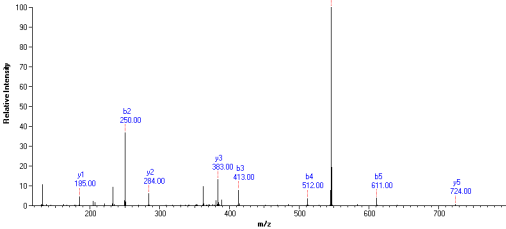

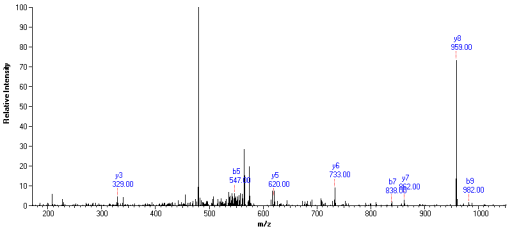

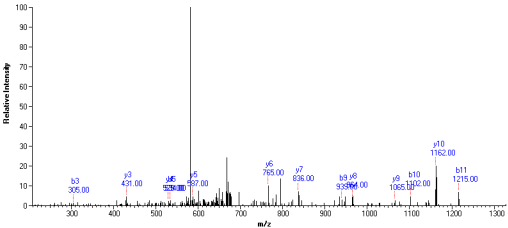

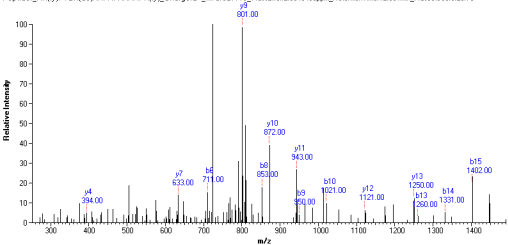

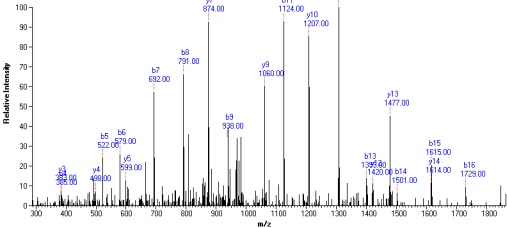

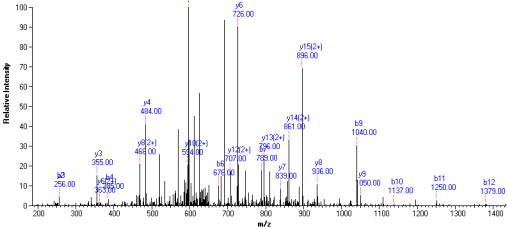

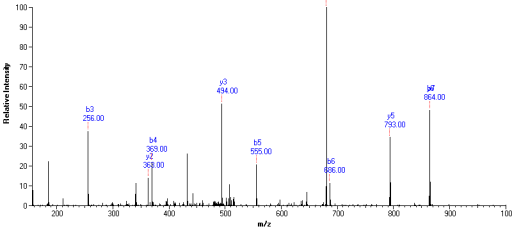



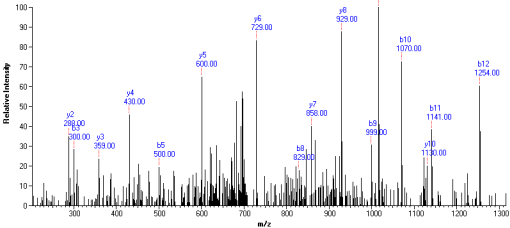

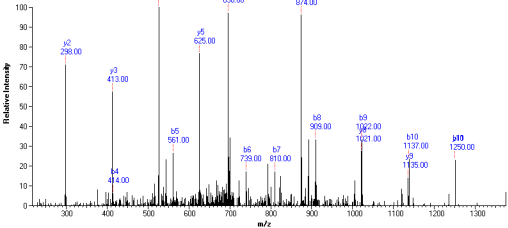

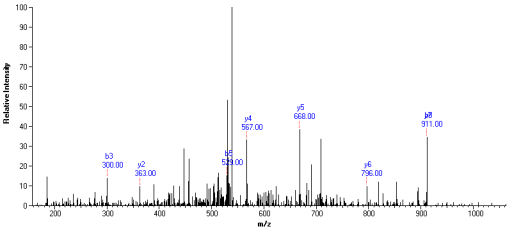

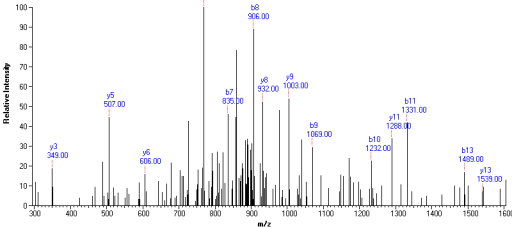

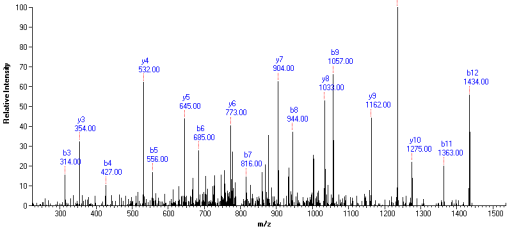

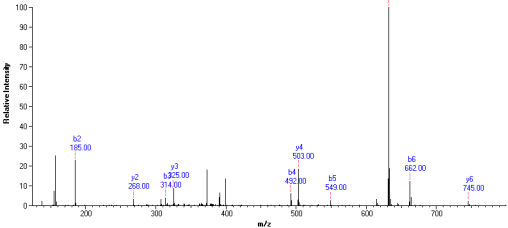

Peptide: \_ALELLK(ac)PLLEDEK(Iy)\_Charge:2+\_m/z:784.96\_MassError:5.659454ppm\_RetentionTime:45.825min\_MascotScore:47.21

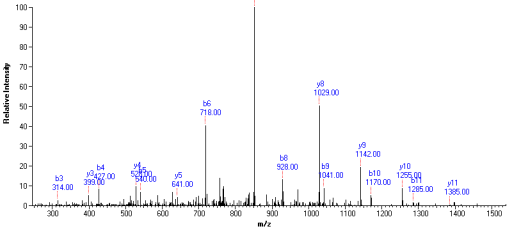

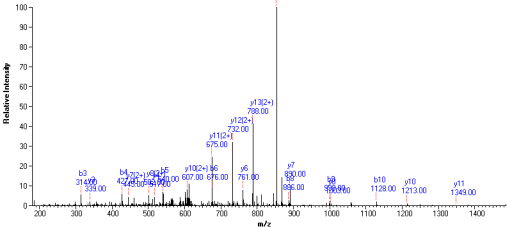



Peptide: \_ALFSGGEEK(ac)PTEQPAPK[ly]\_ Charge: 2+ \_m/z: 973\_MassError: 2.4314596ppm\_RetentionTime: 18.496min\_MascotScore: 35.07

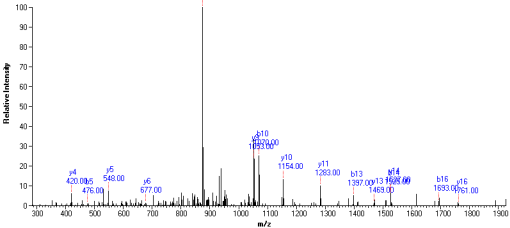

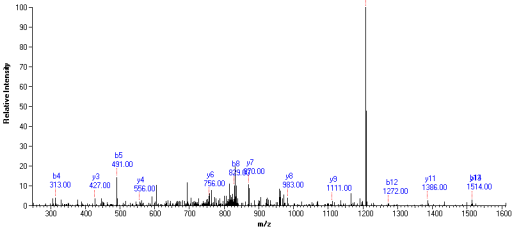

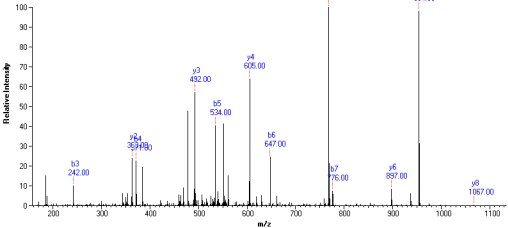

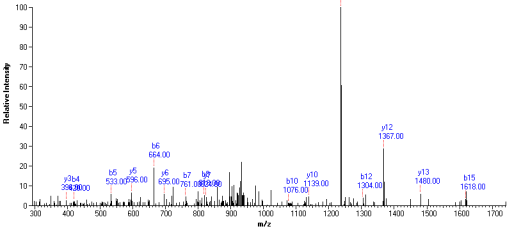

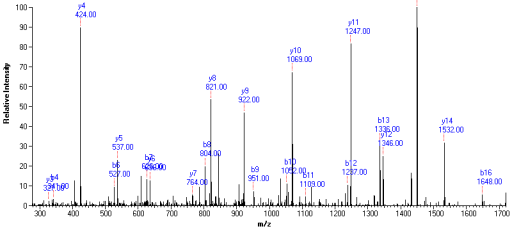

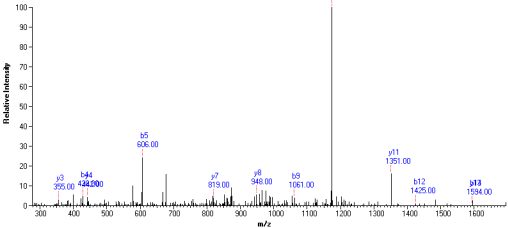

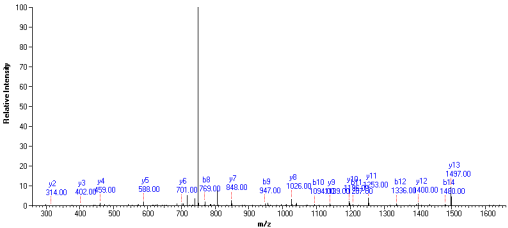

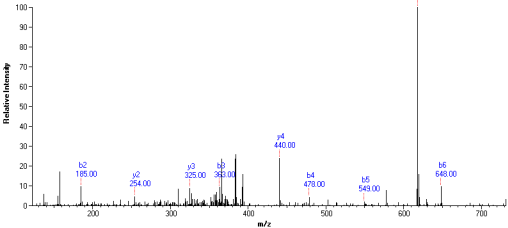



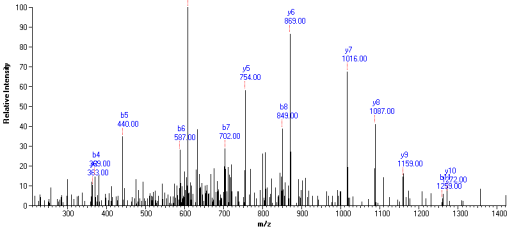

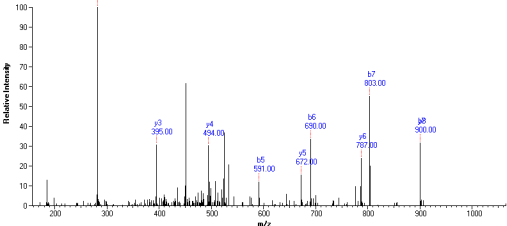

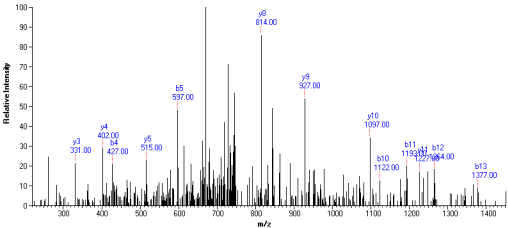

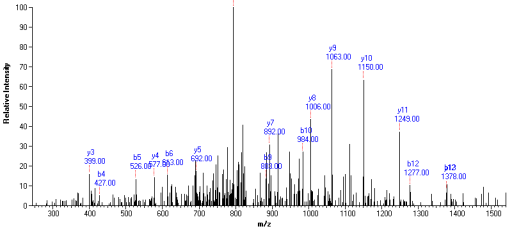

Peptide: \_ALLK(ac)DK(Iy)\_ Charge: 2+\_ m/z: 373.24\_MassError: 1.8920325ppm\_RetentionTime: 12.467min\_MascotScore: 35.1

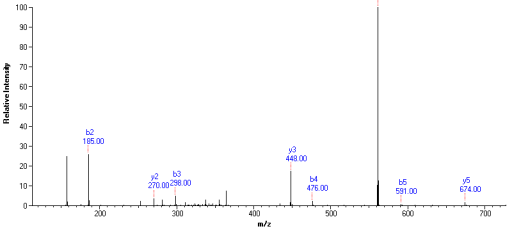

Peptide: \_ALLK(ac)EEK(Iy)\_Charge: 2+\_m/z: 444.77\_MassError: 1.7637762ppm\_RetentionTime: 9.7679min\_MascotScore: 23.64

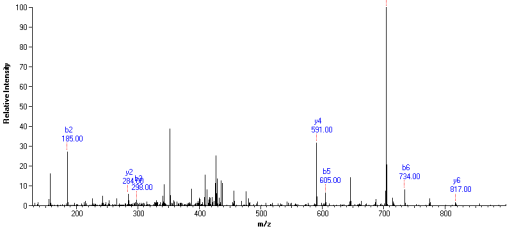

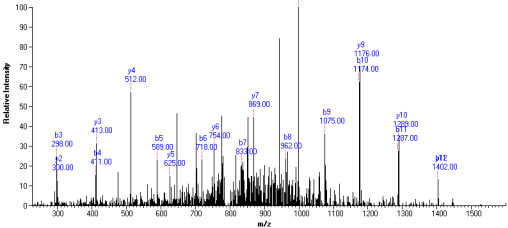

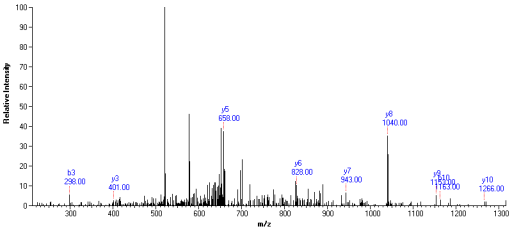



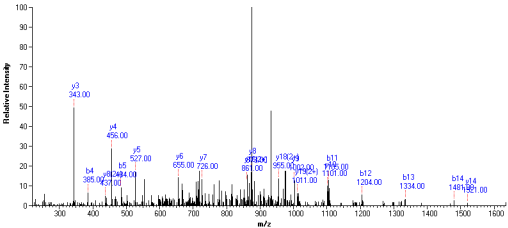

Peptide: \_ALMAEGDK(ac)AIEGTDR\_Charge: 2+\_m/z: 818.9\_MassError: 0.82114891ppm\_RetentionTime: 26.014min\_MascotScore: 109.86

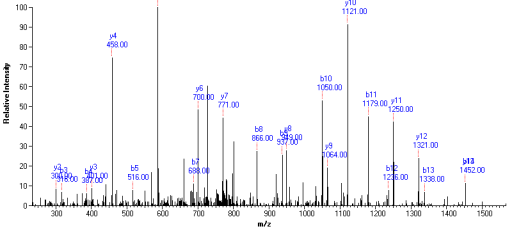

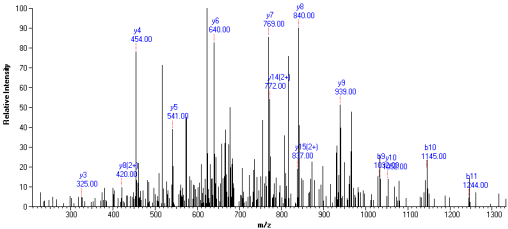

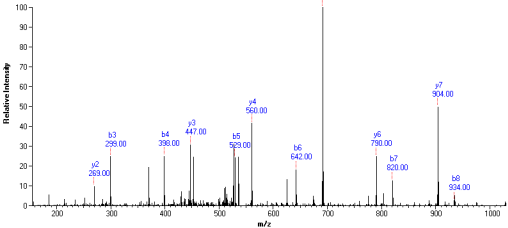

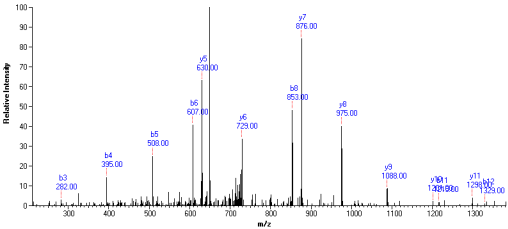

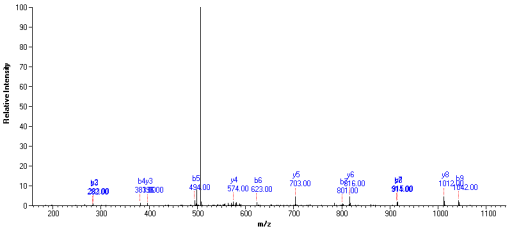

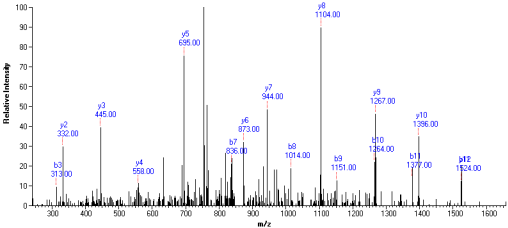

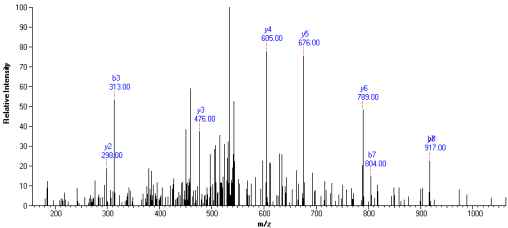



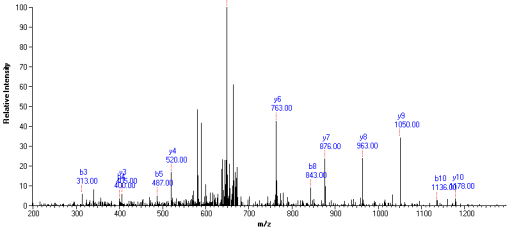

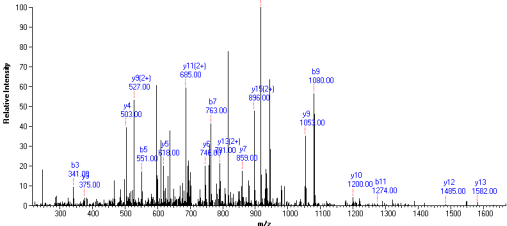

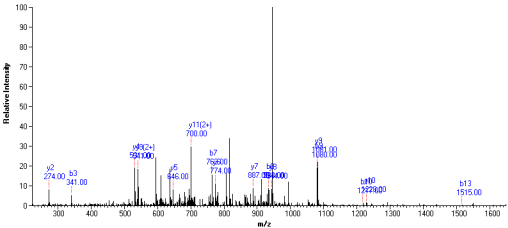

Peptide: \_ALSEALEK(ac)LWB\_Charge: 2+\_m/z: 688.39\_MassError: 1.1843951ppm\_RetentionTime: 38.857min\_MascotScore: 43.74

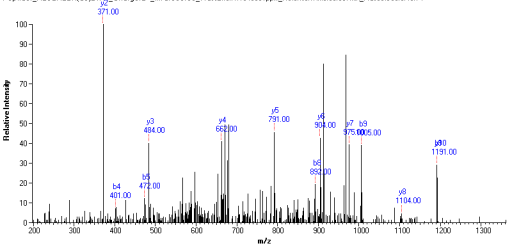

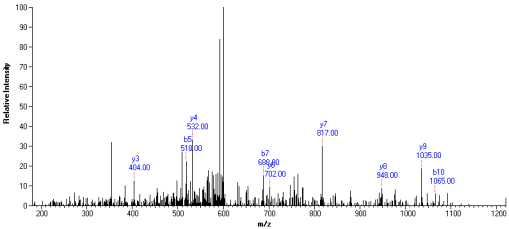

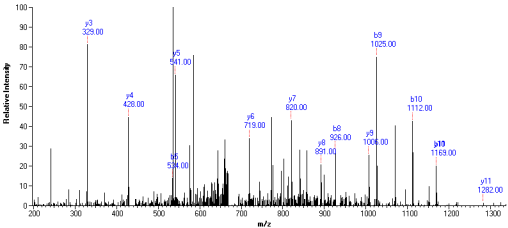

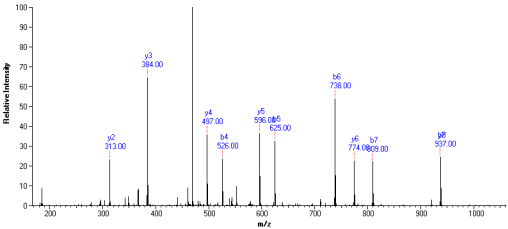

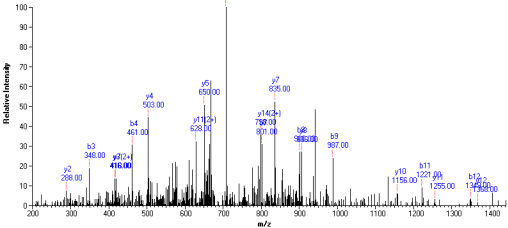



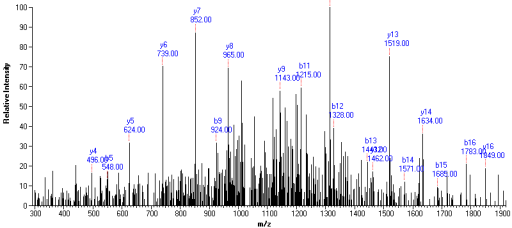

Peptide: \_AMDEQGK(ac)SLDDFLIK(y)\_Charge: 2+\_m/z: 884.45\_MassError: 2.9980967ppm\_RetentionTime: 34.279min\_MascotScore: 69.11

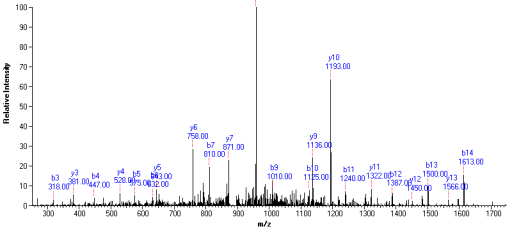

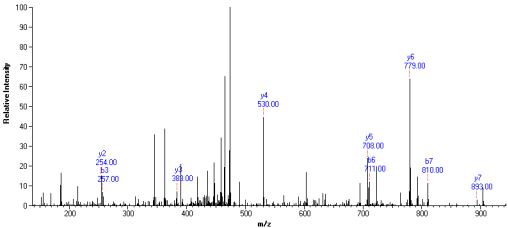

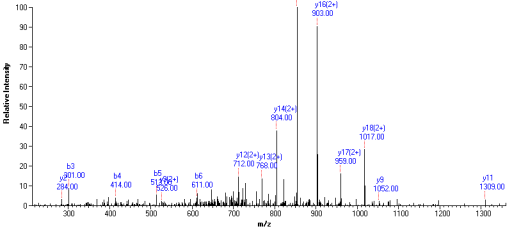

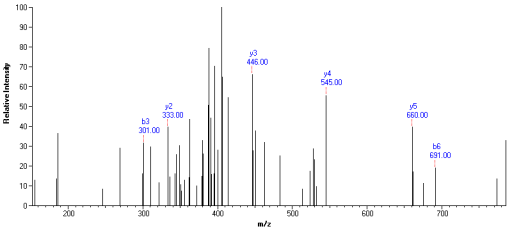

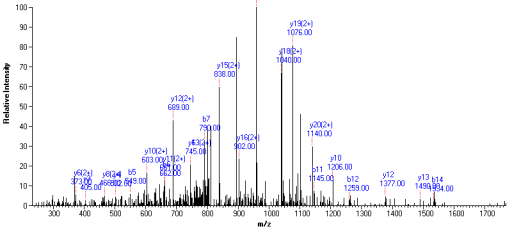

Peptide: \_ANLAK(ac)TMLYAINGGVDEK[ly]\_ Charge: 3+\_ m/z: 656.02\_MassError: 5.2719885ppm\_RetentionTime: 47.089min\_MascotScore: 35.39

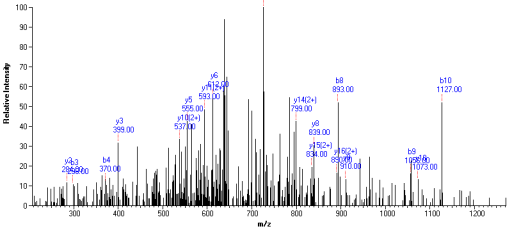

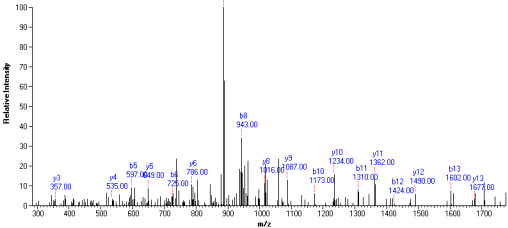



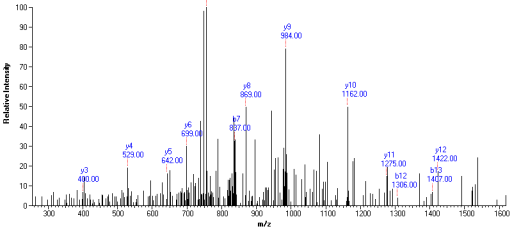

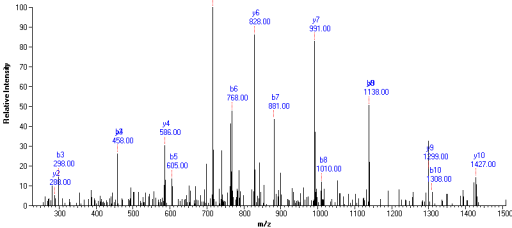

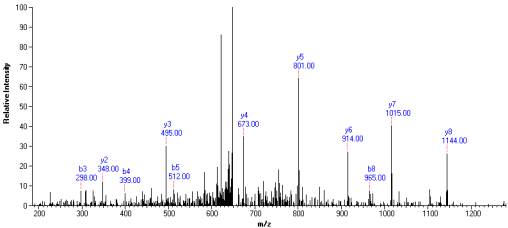

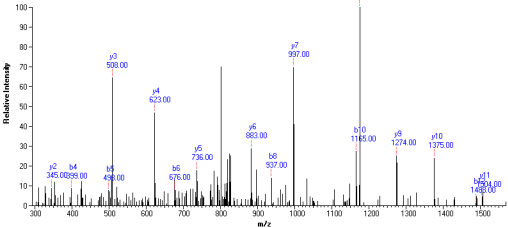

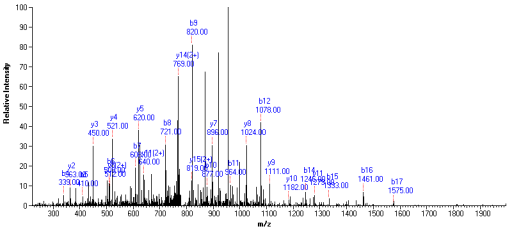

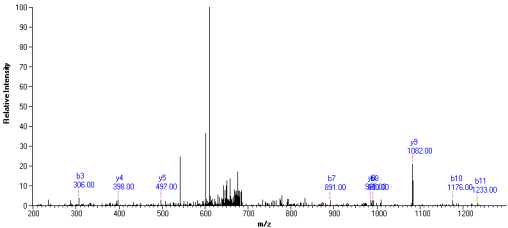

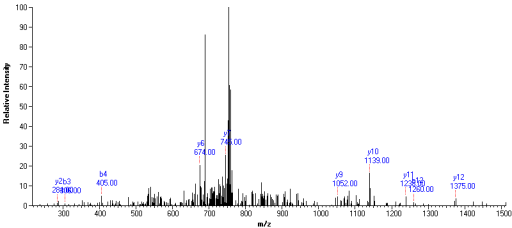

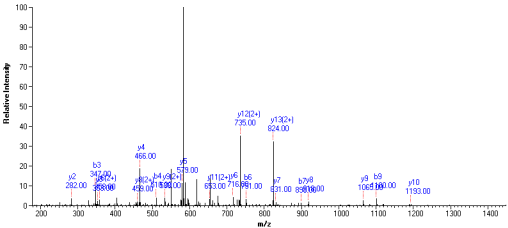



Peptide: \_APVIVQFSNGGASFIAGK(ac)GVK(ly)\_Charge: 2+\_m/z: 1053.59\_MassError: 2.2212682ppm\_RetentionTime: 33.963min\_MascotScore: 69.22

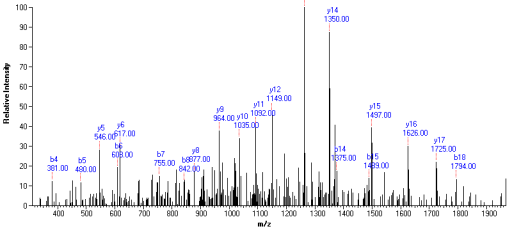

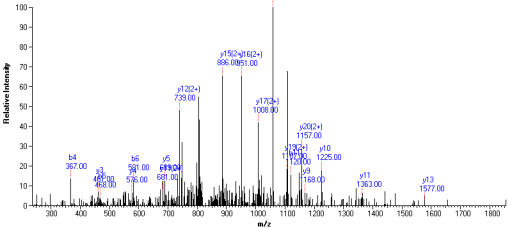

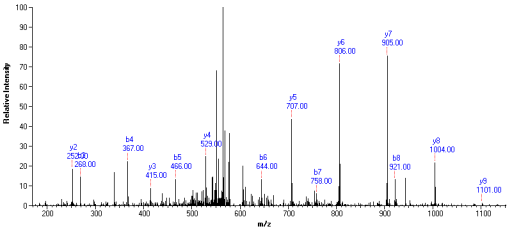

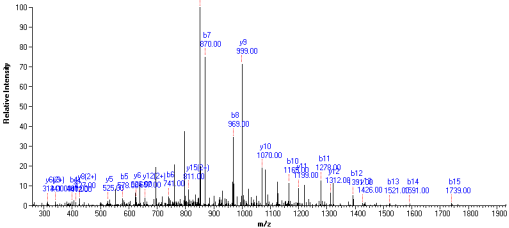

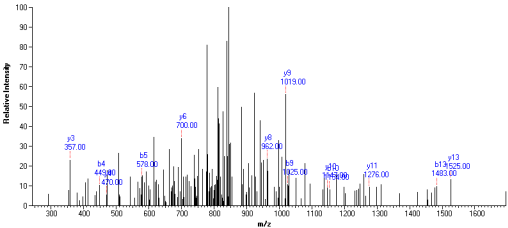

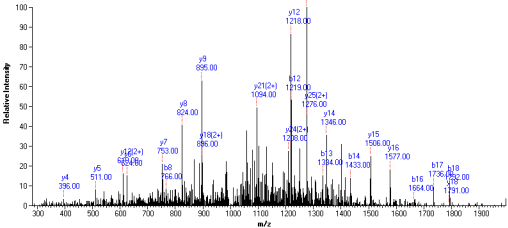

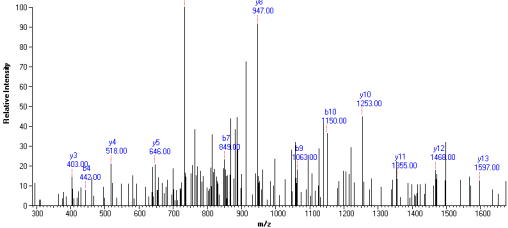

Peptide: \_AQFK(ac)HLAR\_Charge: 2+\_m/z: 515.8\_MassError: 0.17530257ppm\_RetentionTime: 12.415min\_MascotScore: 36.22

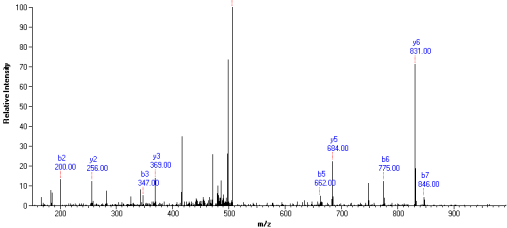



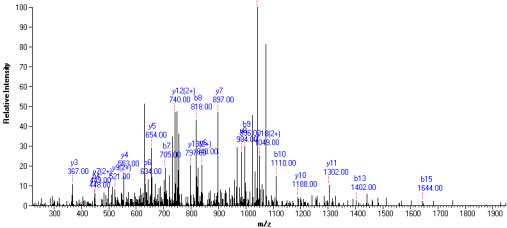

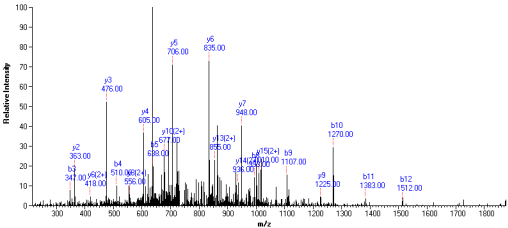

Peptide: \_AQQGK(ac)YYPVHLSGGQQQR\_Charge:2+\_m/z: 907.48\_MassError:1.7925471ppm\_RetentionTime:10.83min\_MascotScore:51.01

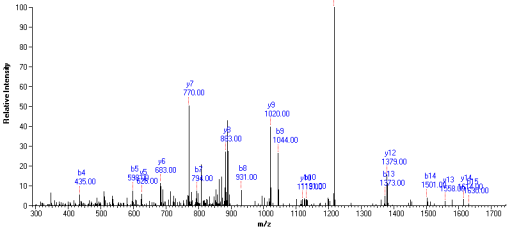

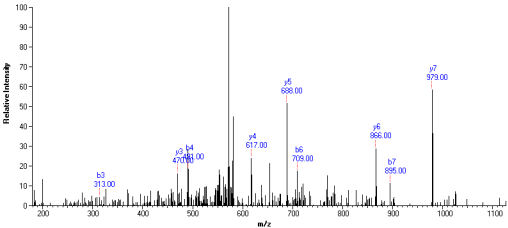

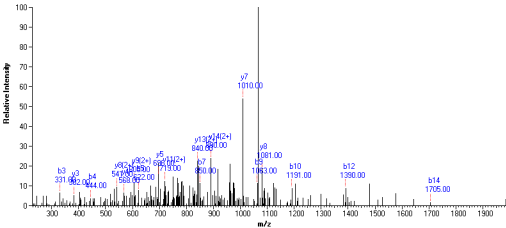

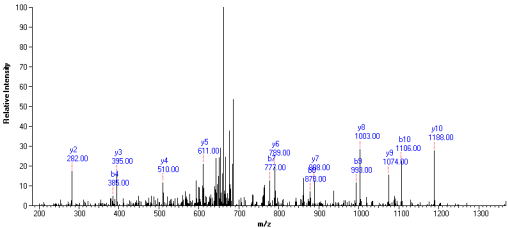

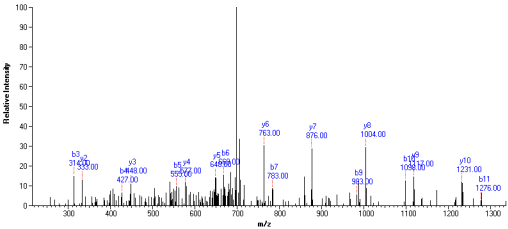

Peptide: \_AQSLK(ac)EIK(Iy)\_Charge:2+\_m/z:487.8\_MassError:0.97843121ppm\_RetentionTime:15.257min\_MascotScore:42.04

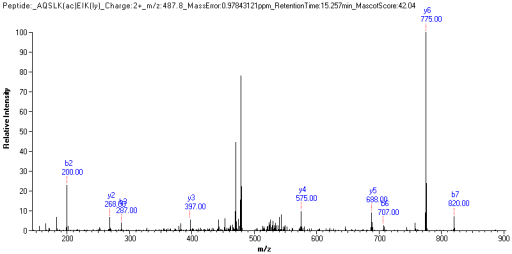



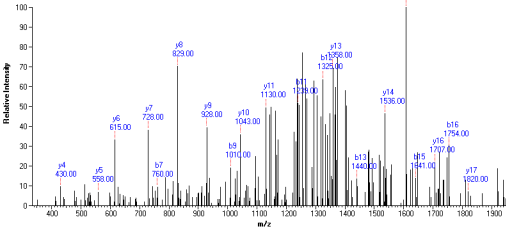

Relative Intensity

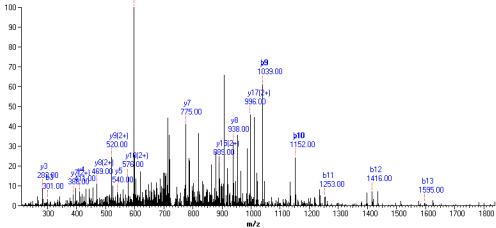

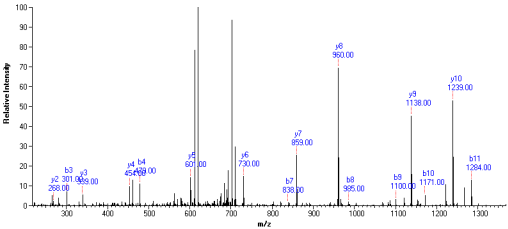

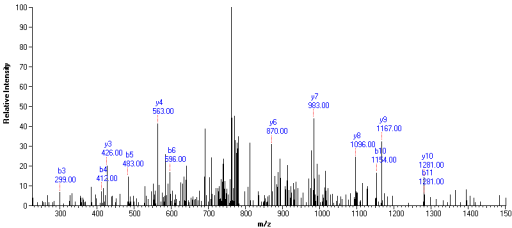

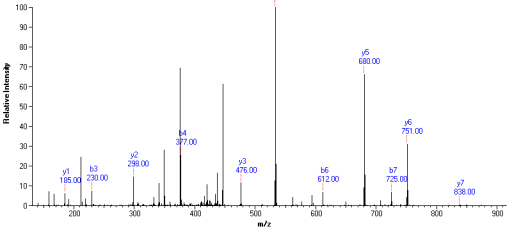

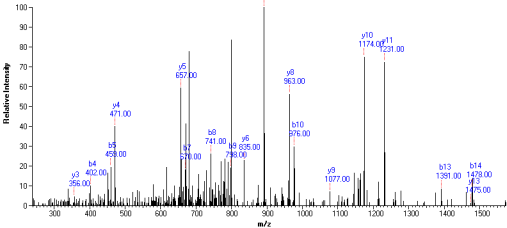

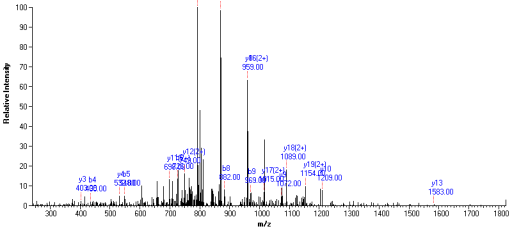

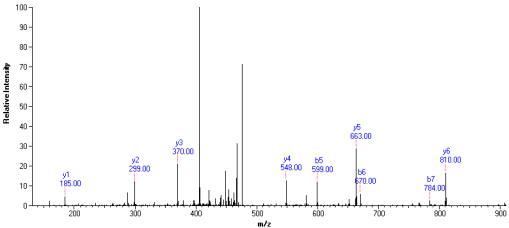



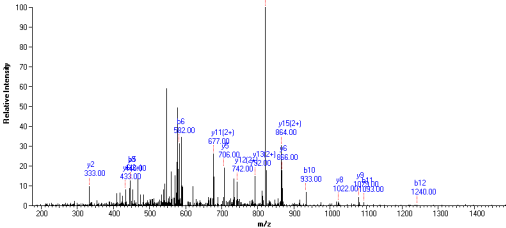

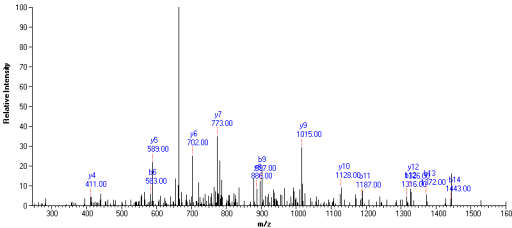

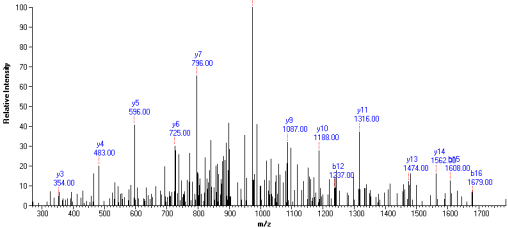

Peptide: \_ASNELAK(ac)EQGACPWFNETTYAK([y]\_Charge: 3+\_m/z: 858.4\_MassError: 1.8560984ppm\_RetentionTime: 36.145min\_MascotScore: 20.7

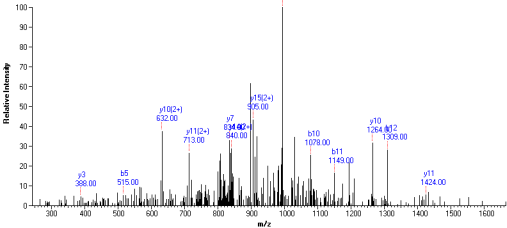

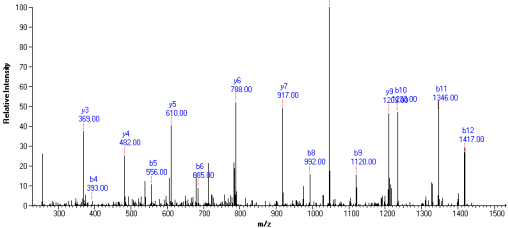

Peptide: \_ASSGLNEDEIQK(ac)MVR\_Charge:2+\_m/z: 859.92\_MassError:2.41487ppm\_RetentionTime:26.141min\_MascotScore:57.03

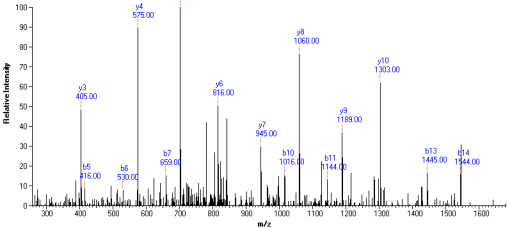

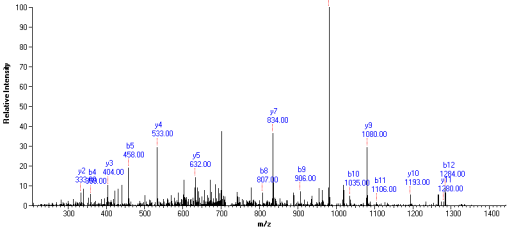

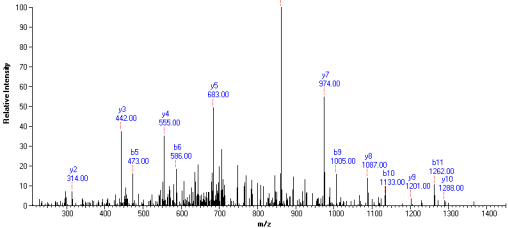



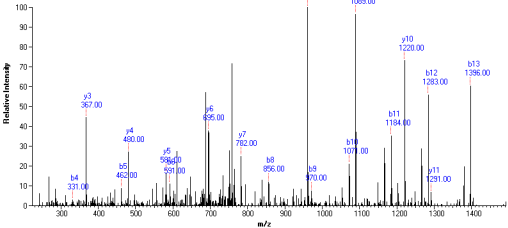

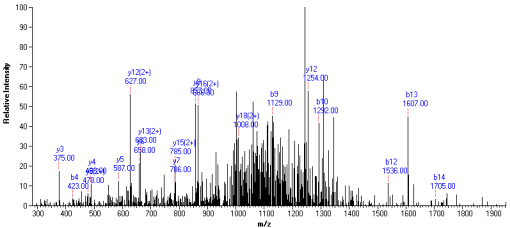

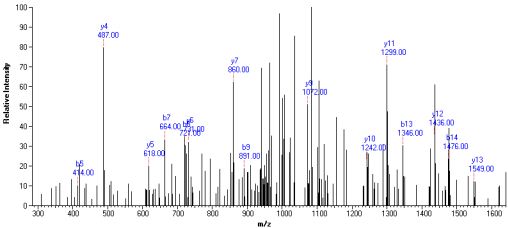

Peptide: \_ATDESK(ac)ELFEGR\_Charge:2+\_m/z: 721.35\_MassError:-1428.7017ppm\_RetentionTime:24.591min\_MascotScore:78.27

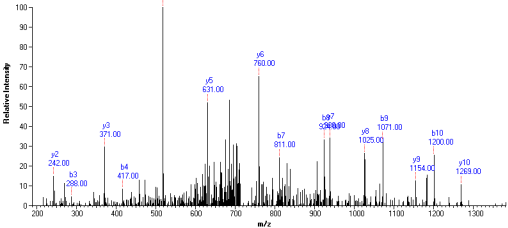

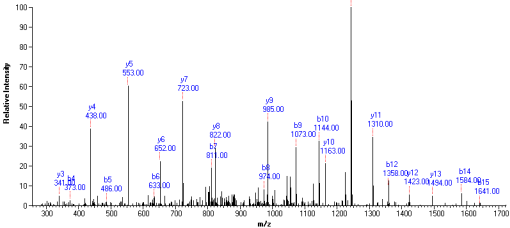

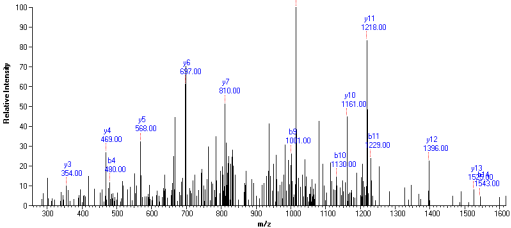

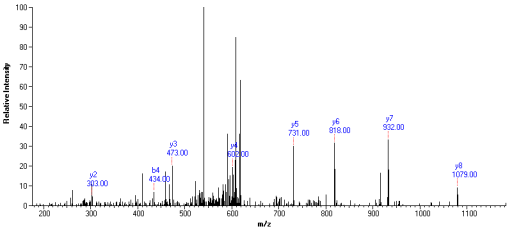

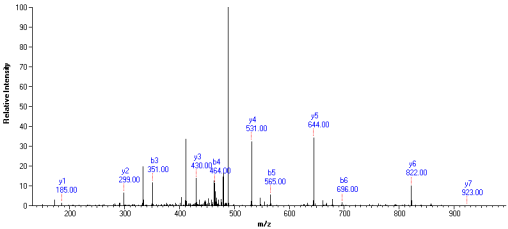



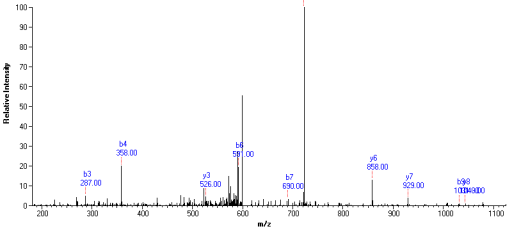

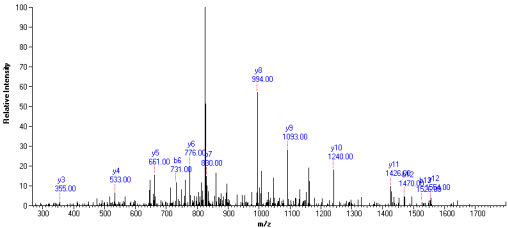

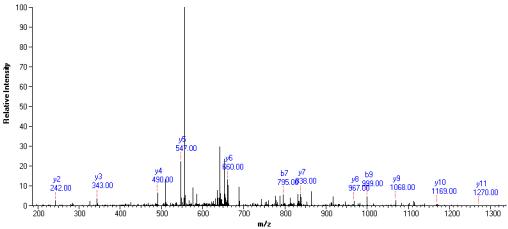

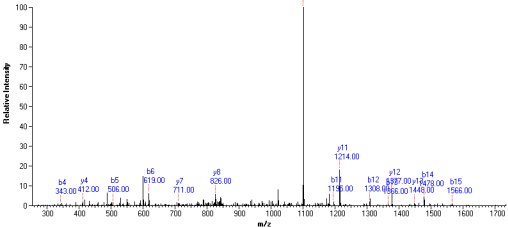

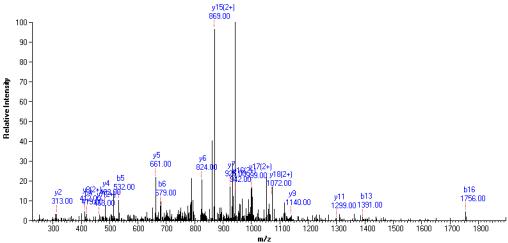

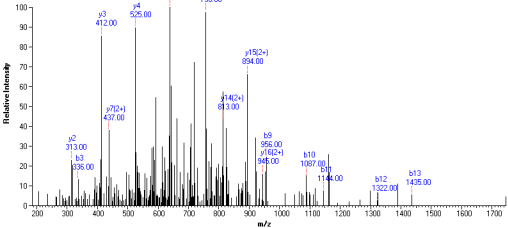

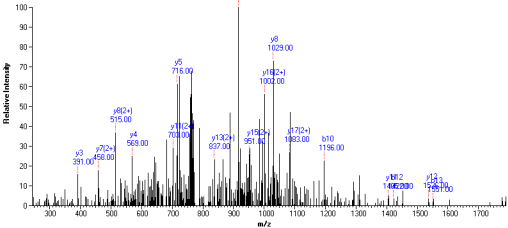

Peptide: \_AVAAGMNPMDLK(ac)R\_Charge:2+\_m/z: 717.37\_MassError:0.75995379ppm\_RetentionTime:24.142min\_MascotScore:40.05

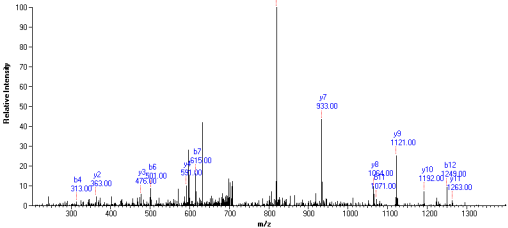



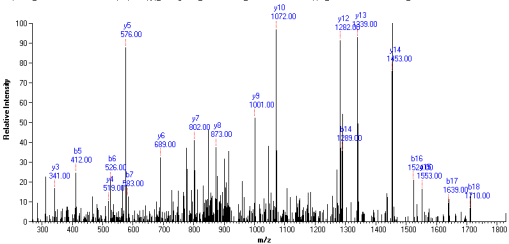

Peptide: \_AVAEVYASSDAHEK(jac)FYK(Iy)\_Charge: 2+\_m/z: 955.49\_MassError: 2.5451709ppm\_RetentionTime: 22.959min\_MascotScore: 44.03

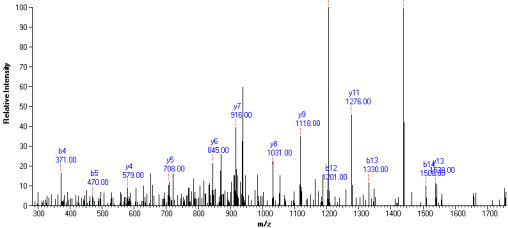

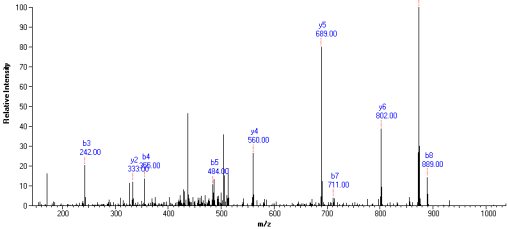

Peptide: \_AVALK(jac)EAMEPEFK(Iy)\_Charge: 2+\_m/z: 760.9\_MassError: 0.74511615ppm\_RetentionTime: 34.672min\_MascotScore: 59.67

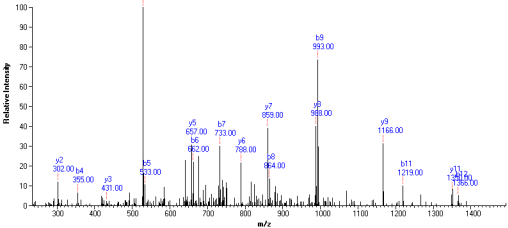

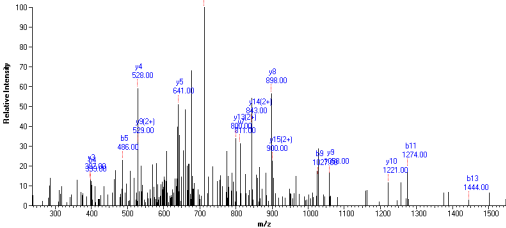

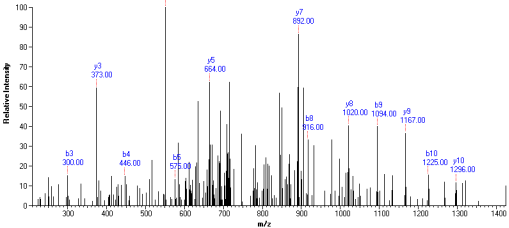

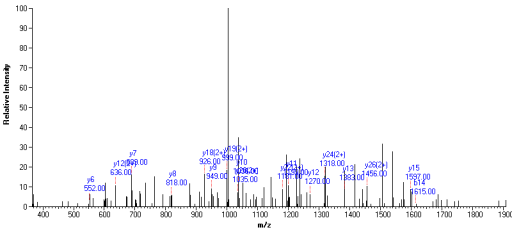

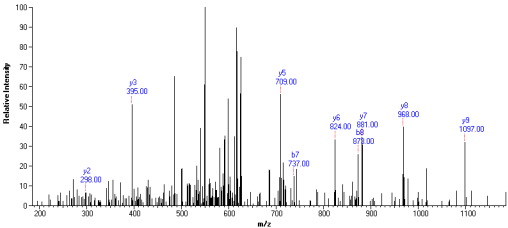



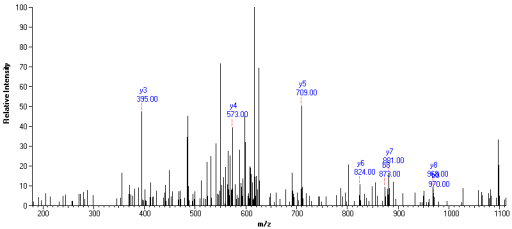

Peptide: \_AVEYFLK(ac)EK[ly]\_ Charge: 2+ \_m/z: 592.83 \_MassError: 0.90653272ppm \_RetentionTime: 26.163min \_MascotScore: 45.62

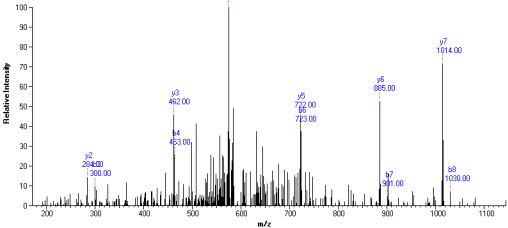

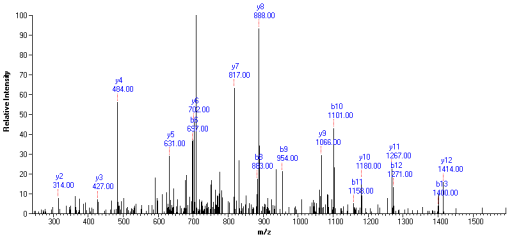

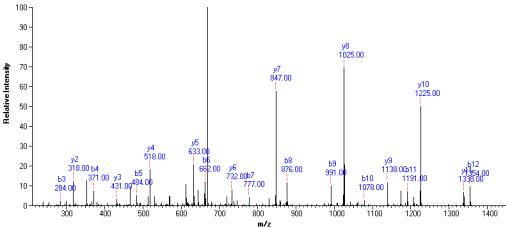

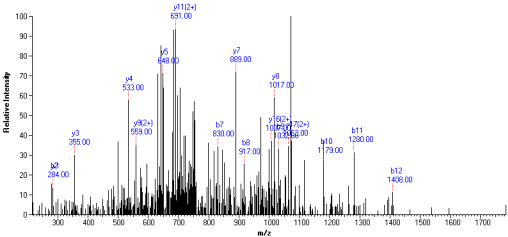

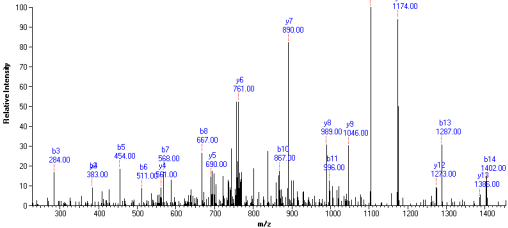

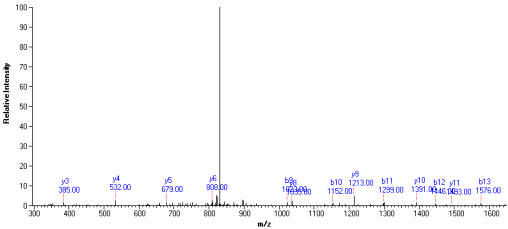

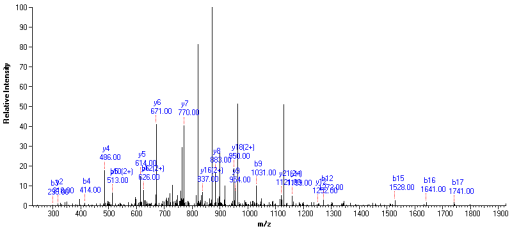



Peptide: \_AVQEQVASEK(ac)AELAK(y)\_ Charge: 2+\_ m/z: 829.95\_MassError:0.53300403ppm\_RetentionTime:21.704min\_MascotScore:90.43

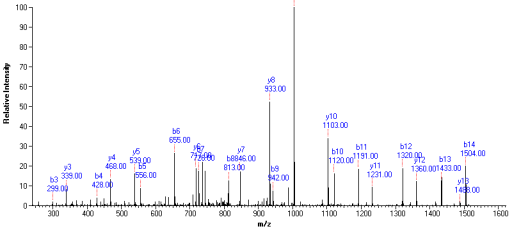

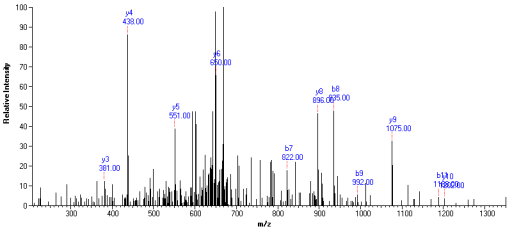

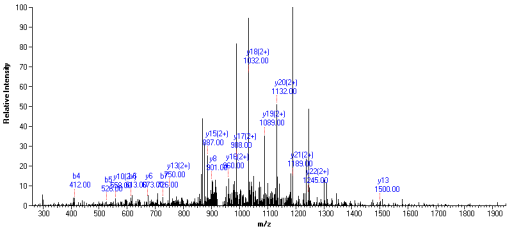

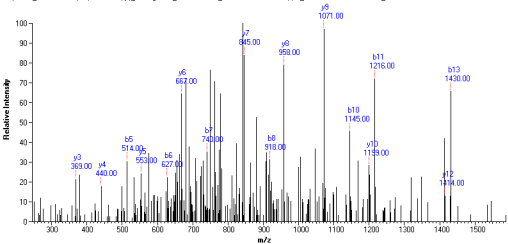

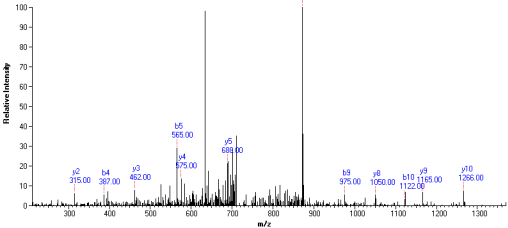

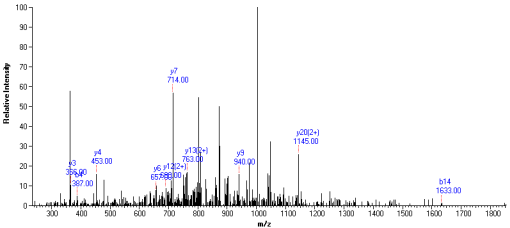

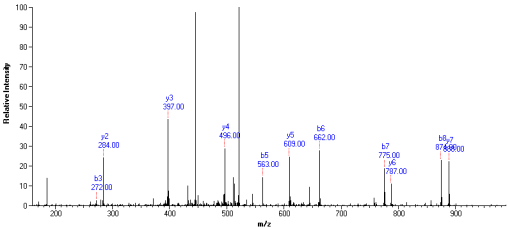

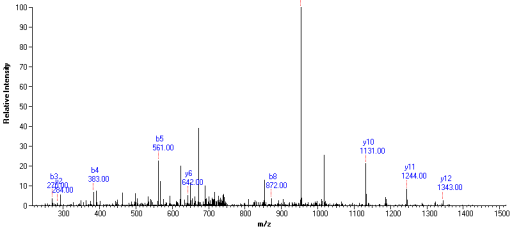



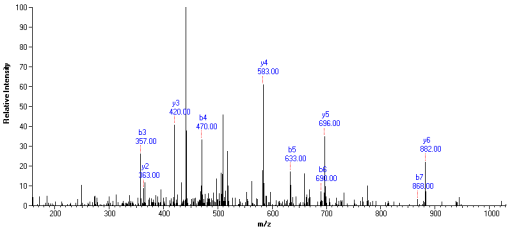

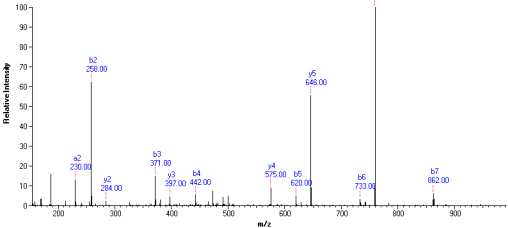

Peptide: \_AYADDK(ac)AIVGGIAR\_Charge: 2+\_m/z: 740.4\_MassError: 1.3769799ppm\_RetentionTime: 23.908min\_MascotScore: 57.83

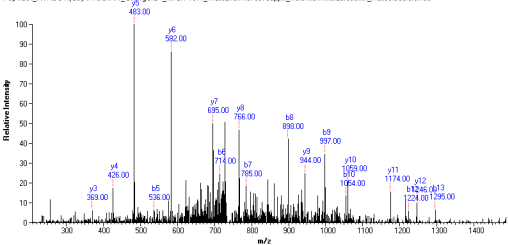

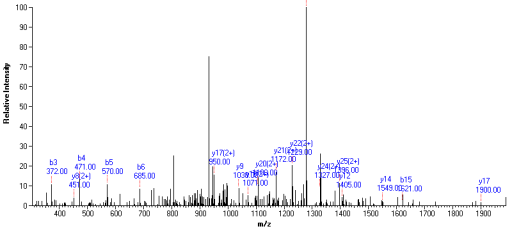

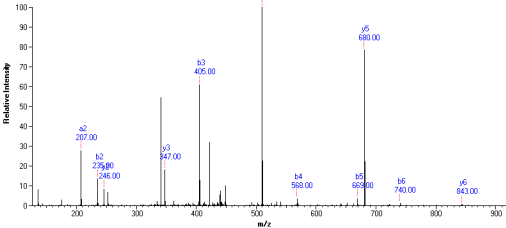

Relative Intensity

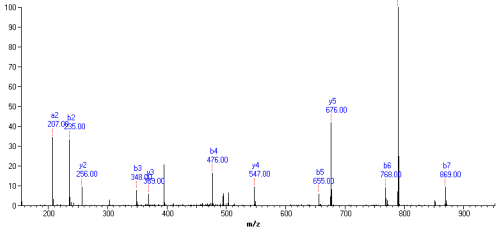

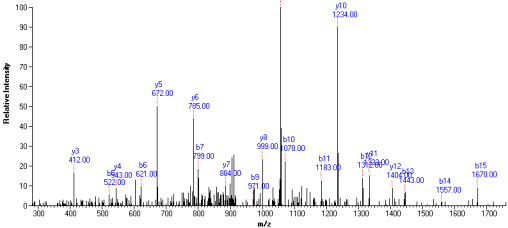

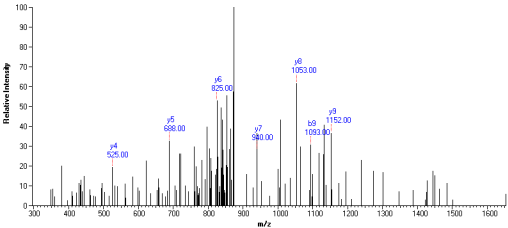



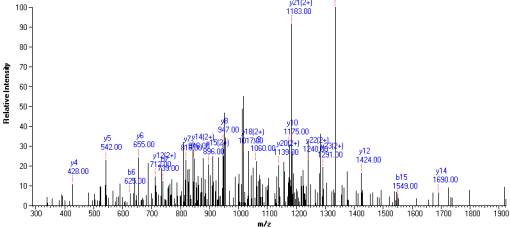

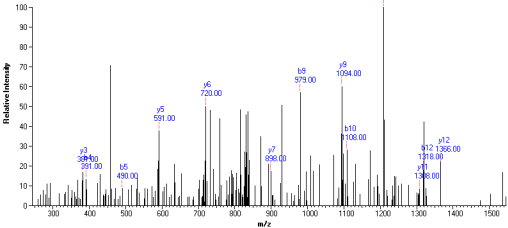

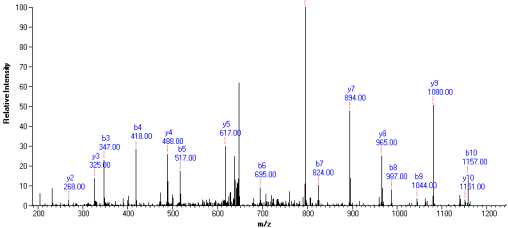

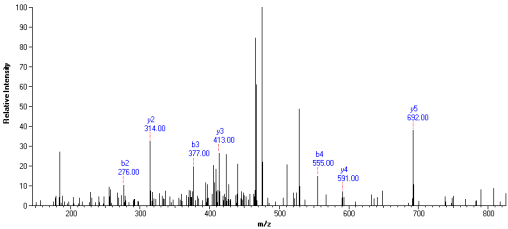

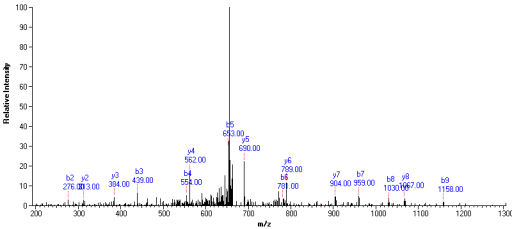

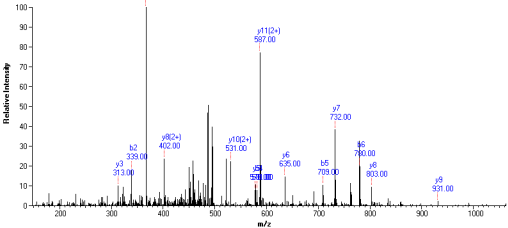

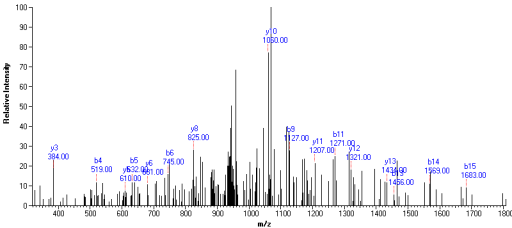

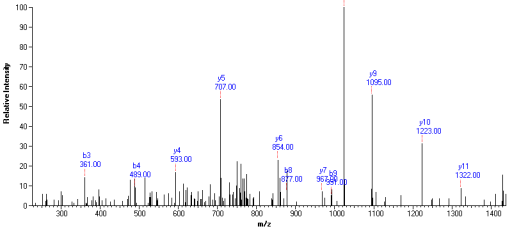



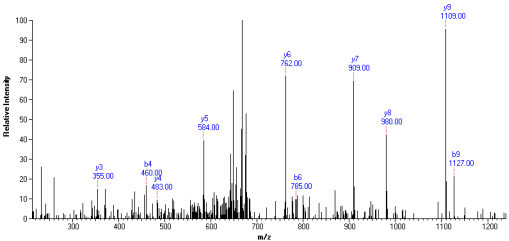

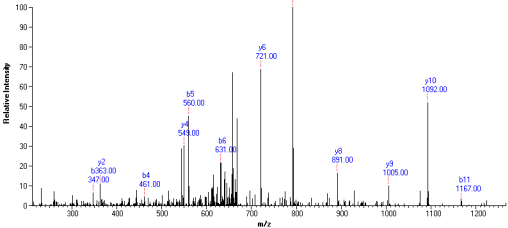

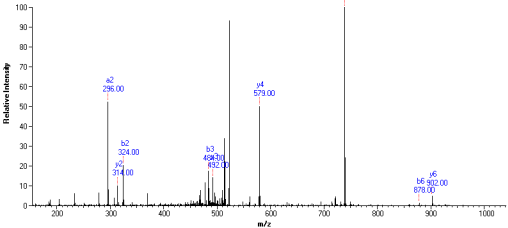

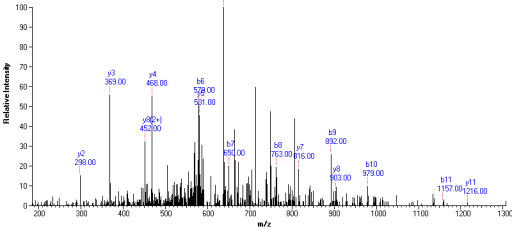

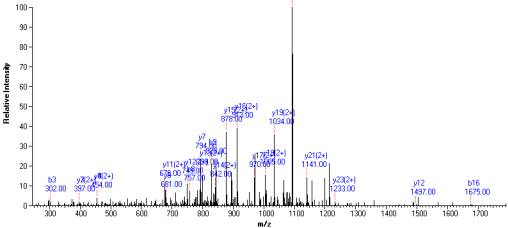

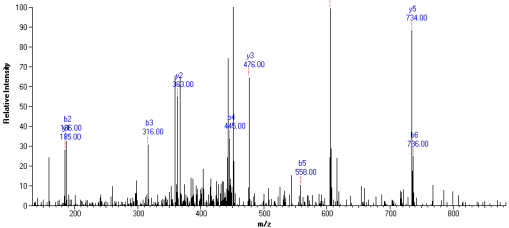

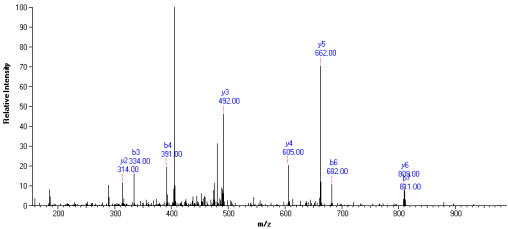

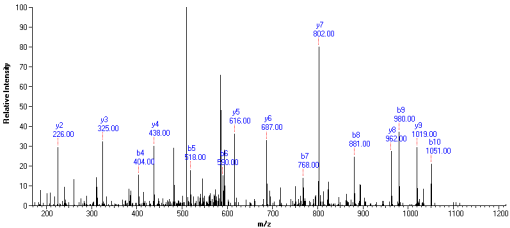



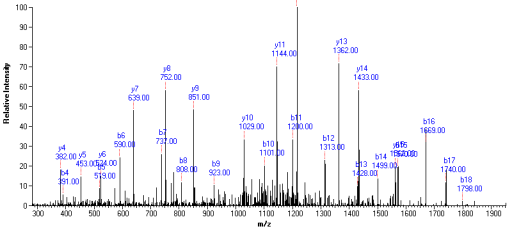

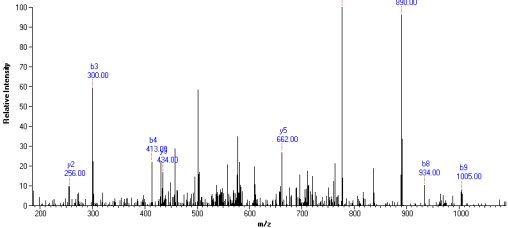

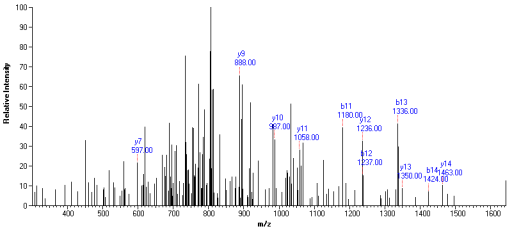

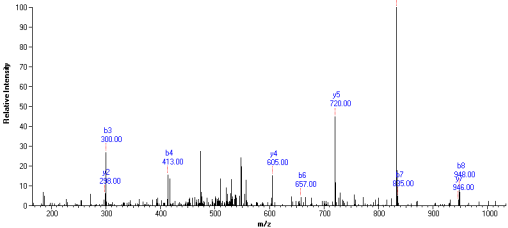

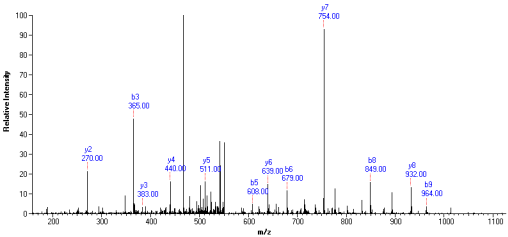

Peptide: \_DAK(ac)VWTFHLR\_Charge: 2+\_m/z: 666.86\_MassError: -2.3102528ppm\_RetentionTime: 32.756min\_MascotScore: 21.67

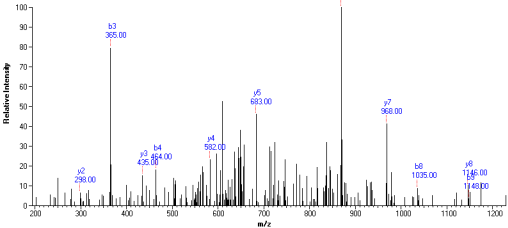

Peptide: \_DALFCWK(ac)YAK\_Charge:2+\_m/z: 640.33\_MassError:0.33434397ppm\_RetentionTime:37.474min\_MascotScore:37.44

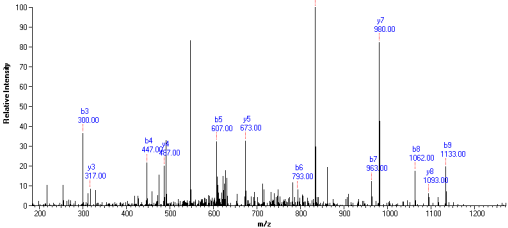

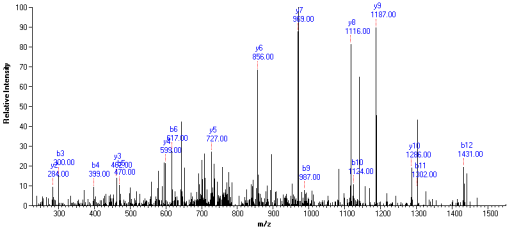



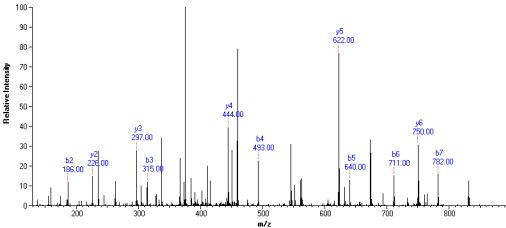

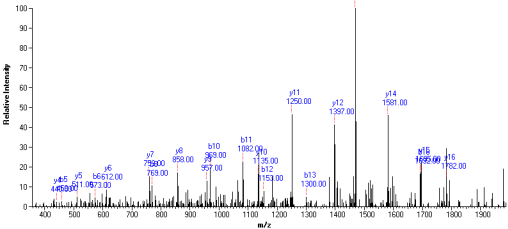

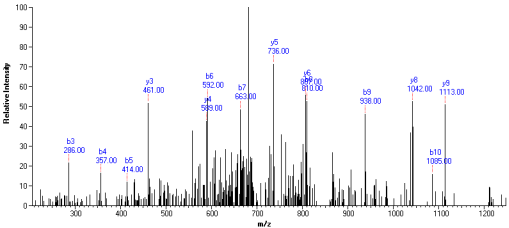

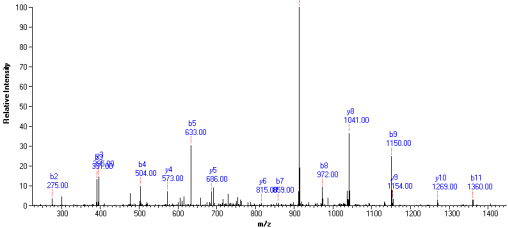

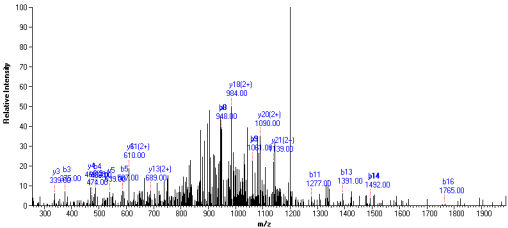

Peptide: \_DDAEALK(ac)K(l)<sub>y</sub>\_ Charge: 2+ <sub>m/z</sub>: 474.25 <sub>MassError</sub>: 0.23521422ppm <sub>RetentionTime</sub>: 8.7212min <sub>MascotScore</sub>: 47.62

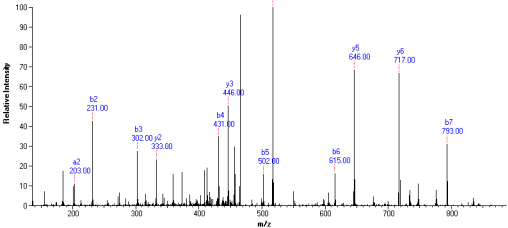

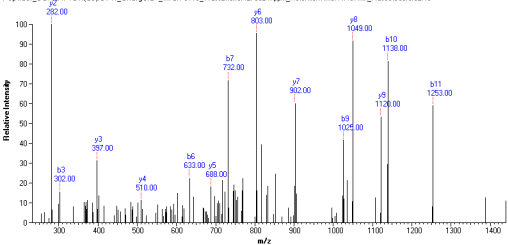

Relative Intensity

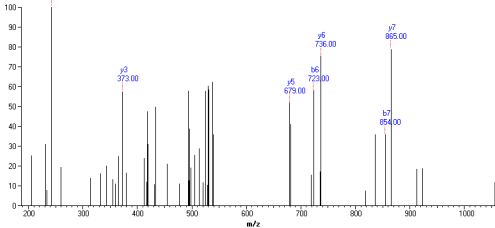



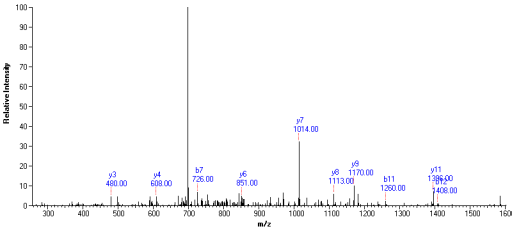

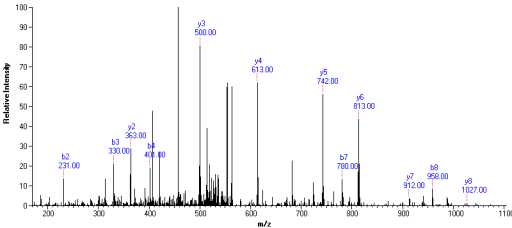

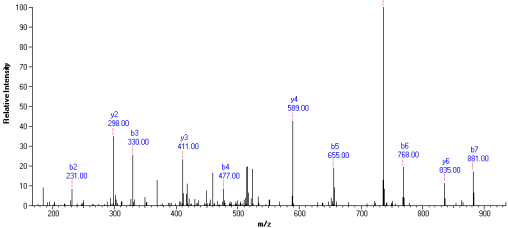

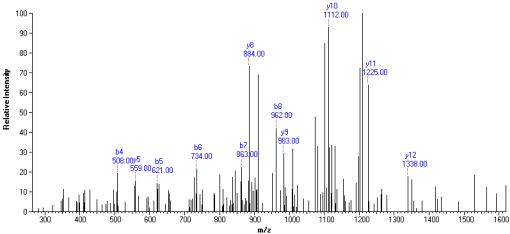

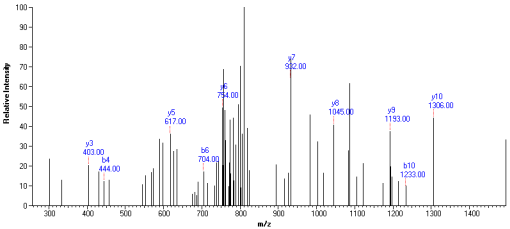

Peptide: \_DEADEK(ac)DAIATVYK(y)\_Charge: 2+\_m/z: 788.89\_MassError: 16200916ppm\_RetentionTime: 17.819min\_MascotScore: 100.28

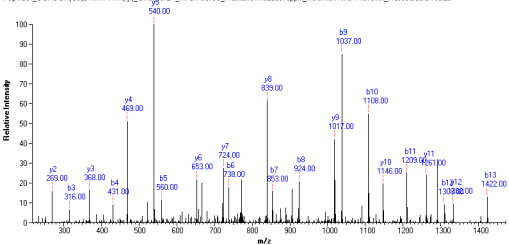

Peptide: \_DEK(ac)GELLVPER\_Charge: 2+\_m/z: 672.86\_MassError: -0.23549697ppm\_RetentionTime: 23.352min\_MaxcortScore: 42.29

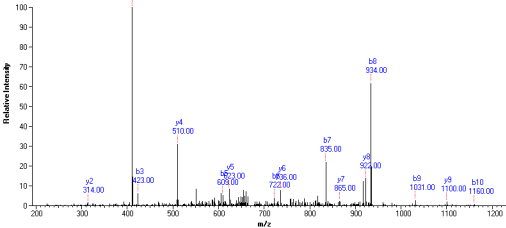

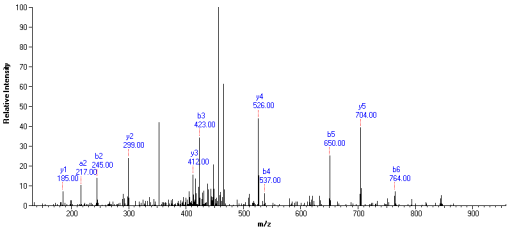



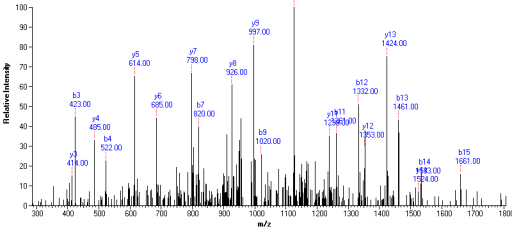

Peptide: \_DELELVK(ac)GASNEFDK(y)\_Charge: 2+\_m/z: 876.44\_MassError: 1.3529334ppm\_RetentionTime: 33.313min\_MascotScore: 68.92

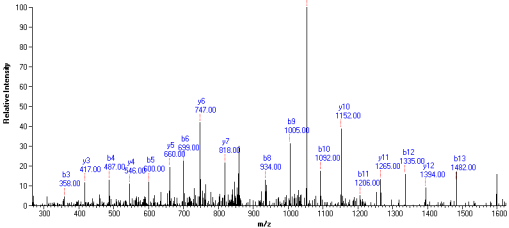

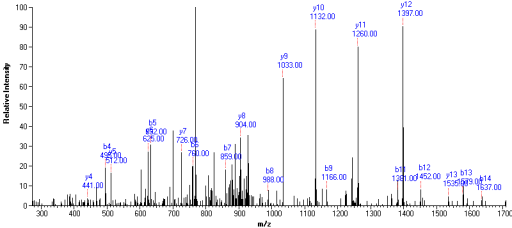

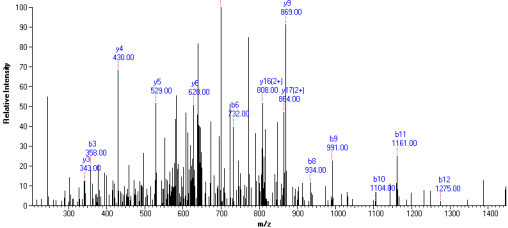

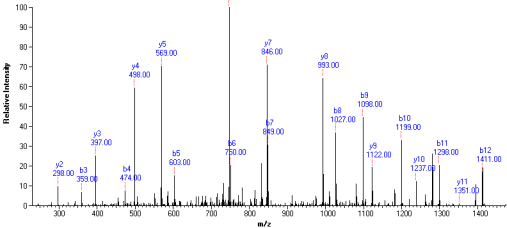

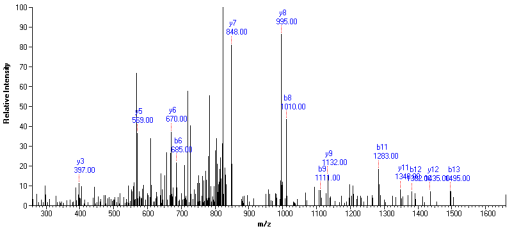

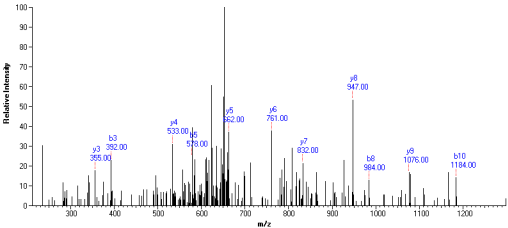

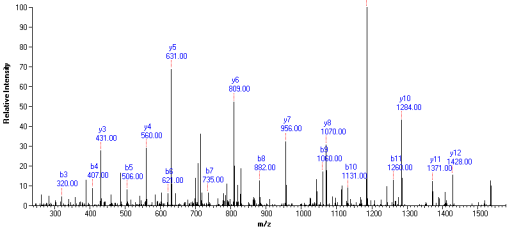



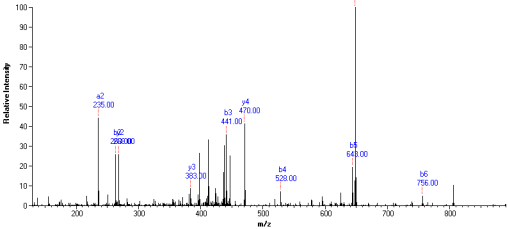

Peptide: \_DFLK(ac)HNPQNPSWADR\_Charge: 2+\_m/z: 942.96\_MassError: 2.6387853ppm\_RetentionTime: 26.964min\_MascotScore: 51.48

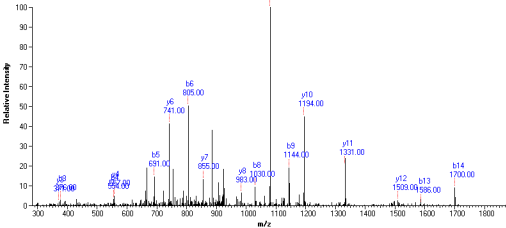

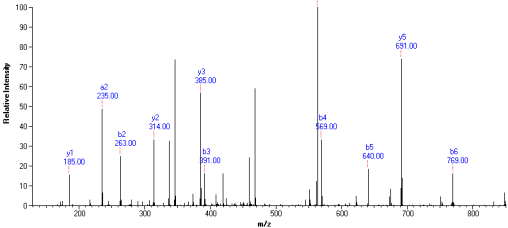

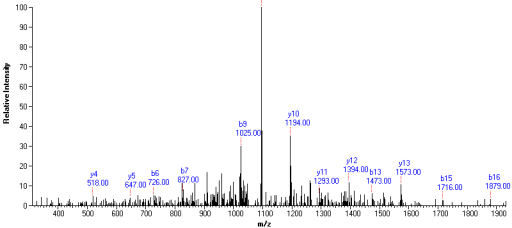

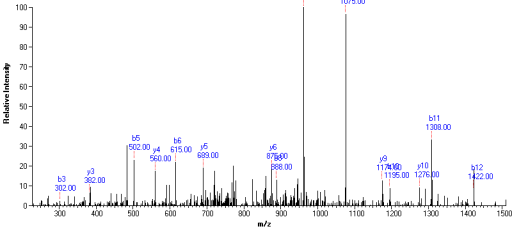

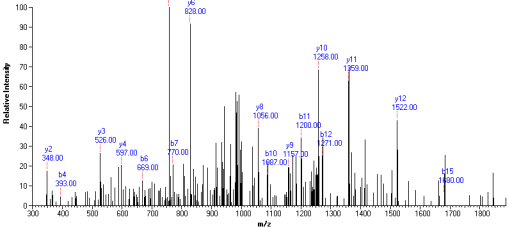

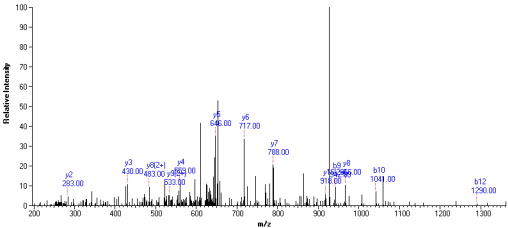

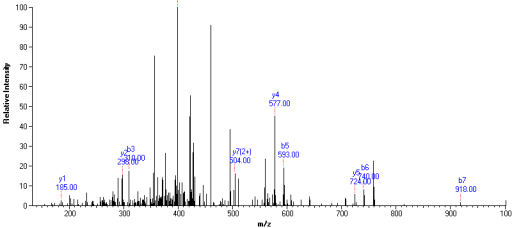



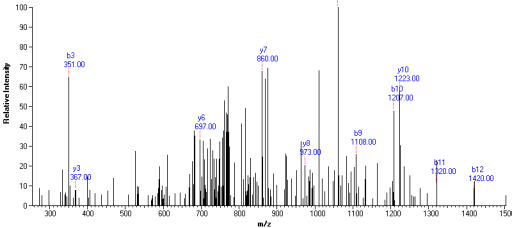

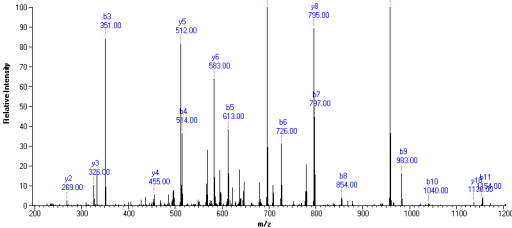

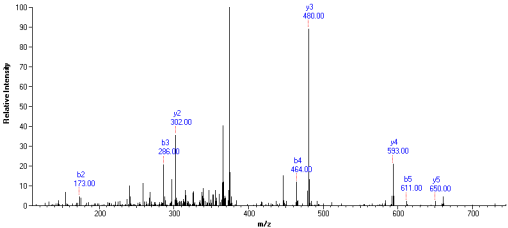

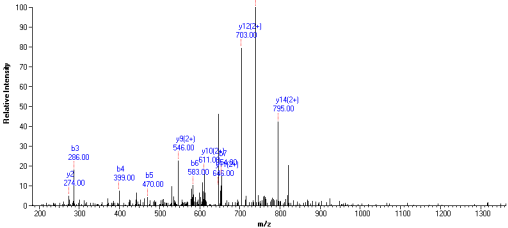

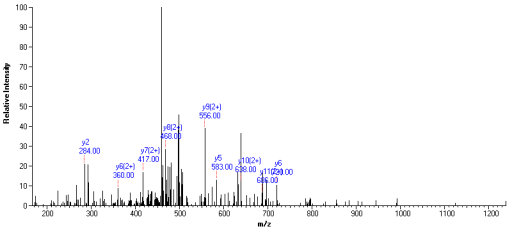

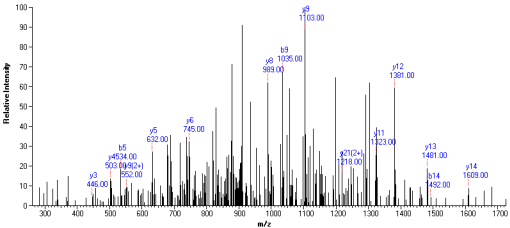

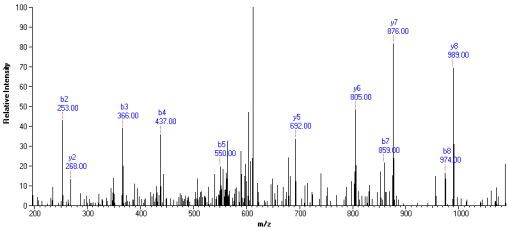

Peptide: \_DHPIK(ac)FPAK(Iy)\_Charge: 2+\_m/z: 555.82\_MassError: 0.73814638ppm\_RetentionTime: 15.91min\_MascotScore: 41.4

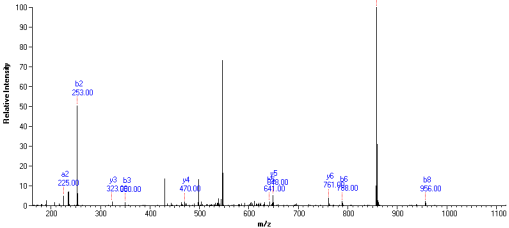



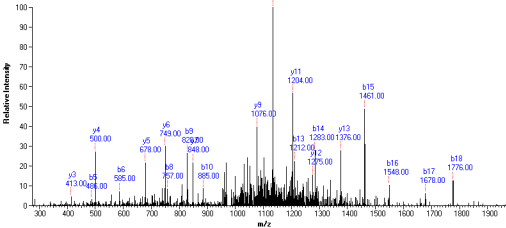

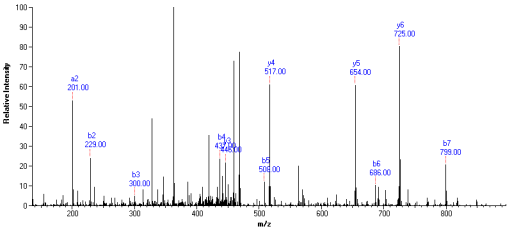

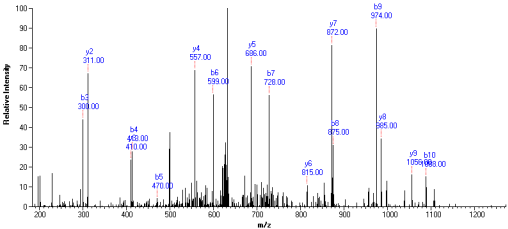

Peptide: \_DIASVK(ac)SEALAYR\_Charge: 2+\_m/z: 741.9\_MassError: 1.7348056ppm\_RetentionTime: 37.794min\_MascotScore: 36.51

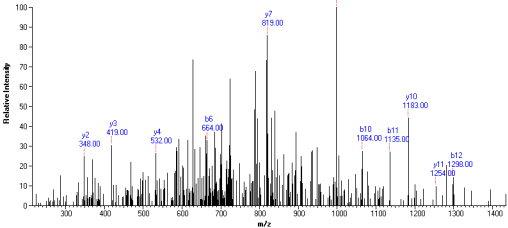

Peptide: \_DIATLK(ac)NYITESGK|y|\_ Charge: 2+\_ m/z: 806.44\_MassError: 1.0227147ppm\_RetentionTime: 37.802min\_MascotScore: 50.24

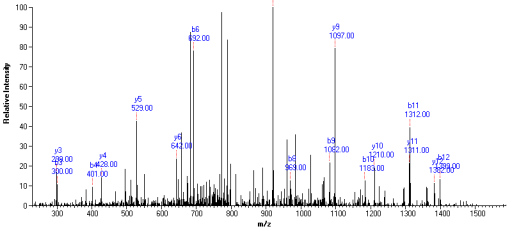

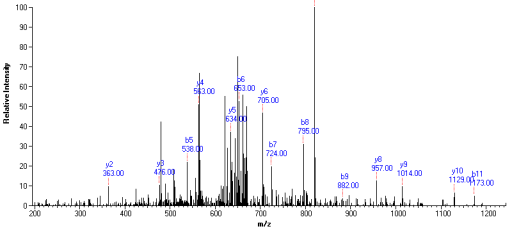

Peptide: \_DIEK(ac)LLK(Iy)\_Charge: 2+\_m/z: 458.79\_MassError: 1.818579ppm\_RetentionTime: 28.436min\_MassotScore: 32.62

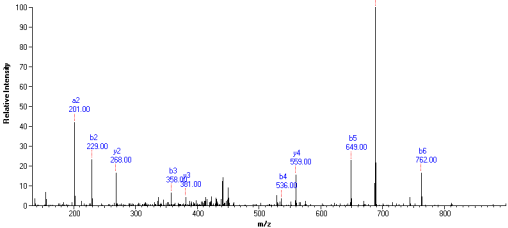

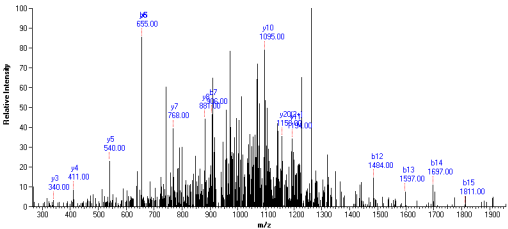



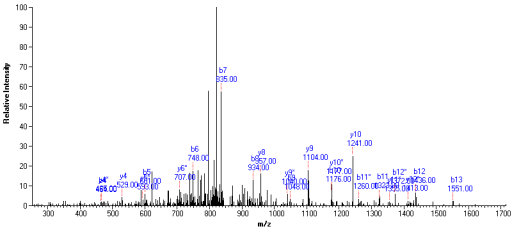

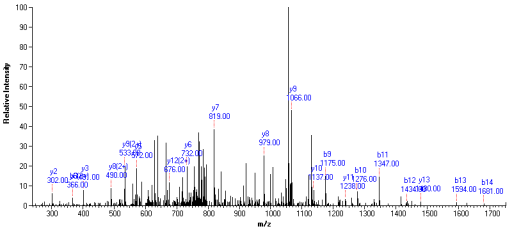

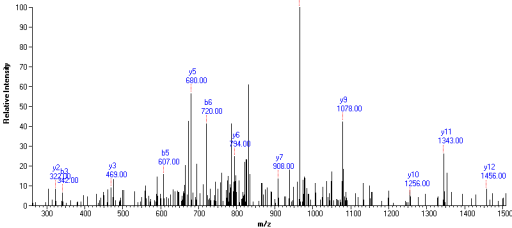

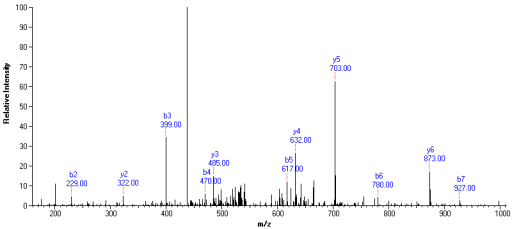

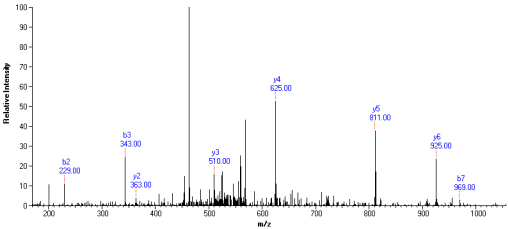

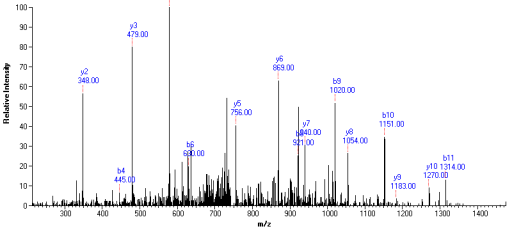

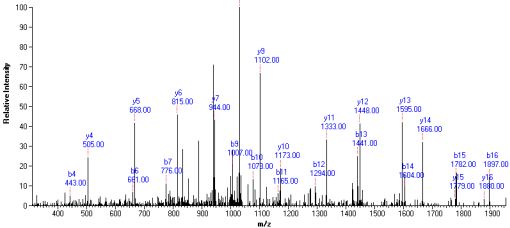

Peptide: \_DIVK(ac)VFTK(Iy)\_Charge:2+\_m/z:504.31\_MassError:1.8538682ppm\_RetentionTime:23.978min\_MascotScore:27.64

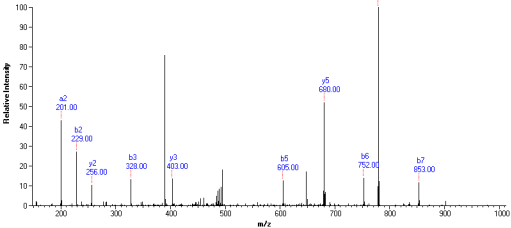



Peptide: \_DIYDIAEK(ac)YGK(Iy)\_Charge: 2+\_m/z: 686.85\_MassError: 0.2563525ppm\_RetentionTime: 31.857min\_MascotScore: 41.35

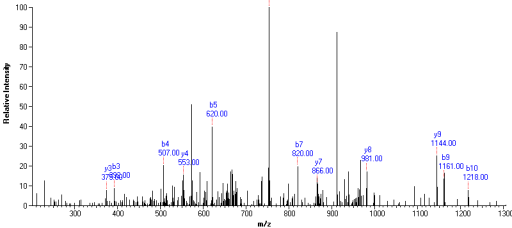

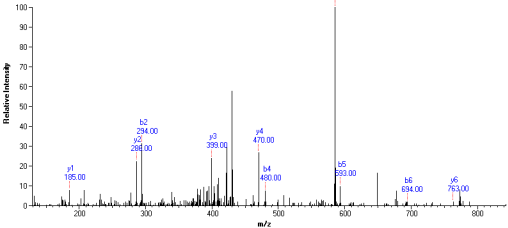

Peptide: \_DK(ac)EISEDDRR\_Charge: 3+\_m/z: 473.88\_MassError: 1.554105ppm\_RetentionTime: 12.043min\_MascotScore: 42.64

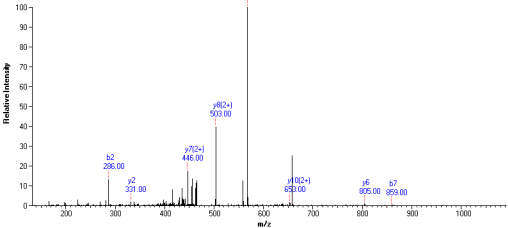

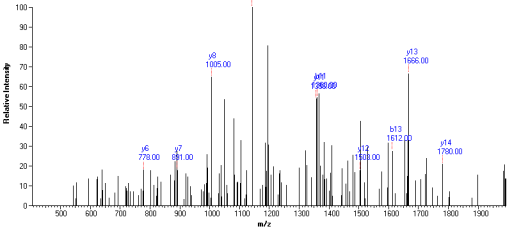

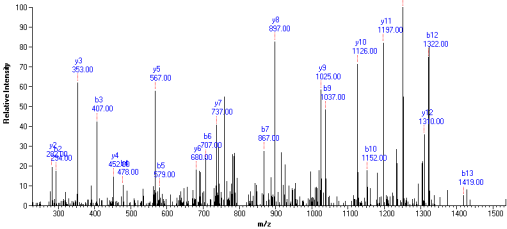

Peptide: \_DK(ac)LEPYFTEGR\_Charge:2+\_m/z:698.84\_MassError:1.577472ppm\_RetentionTime:30.768min\_MascotScore:45.31

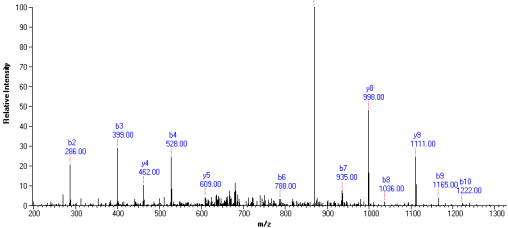

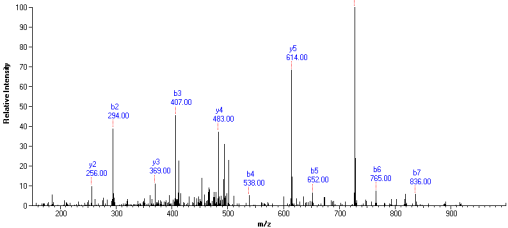

Peptide: \_DK(ac)LSNPYR\_Charge: 2+\_m/z: 494.78\_MassError: 1.2502668ppm\_RetentionTime: 17.324min\_MascotScore: 39.57

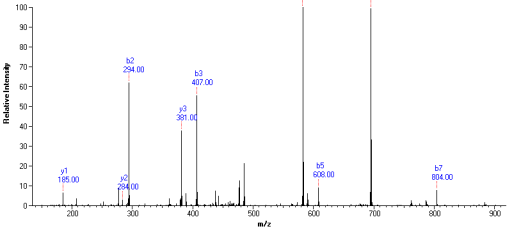



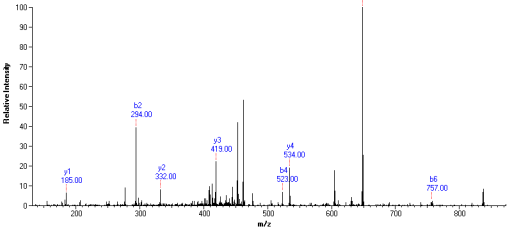

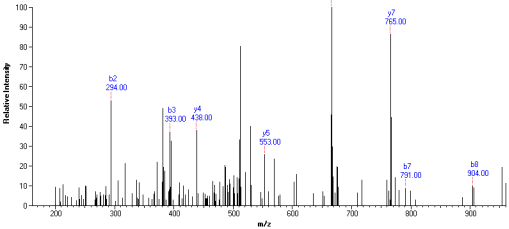

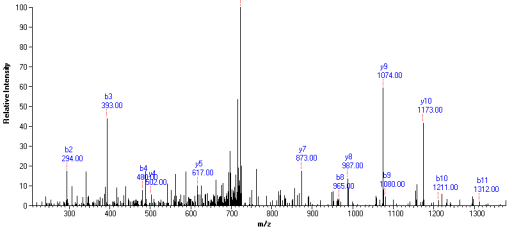

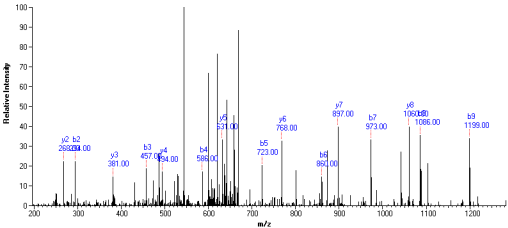

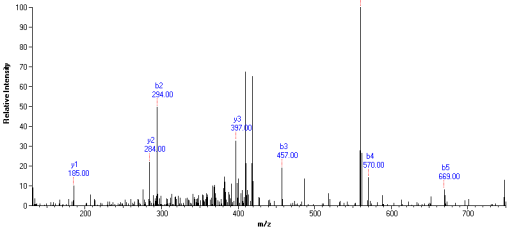

Peptide: \_DK(IY)GEAENEAK(ac)PIDYK(IY)\_Charge: 2+\_m/z: 854.95\_MassError: 2.4038538ppm\_RetentionTime: 11.26min\_MascotScore: 42.14

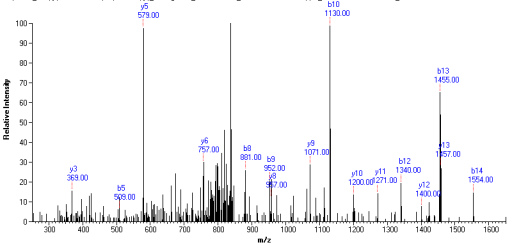

Peptide: \_DK(IY)GEFFAK(ac)SVK(IY)\_Charge: 2+\_m/z: 661.37\_MassError: 1.247453ppm\_RetentionTime: 22.305min\_MascotScore: 53.9

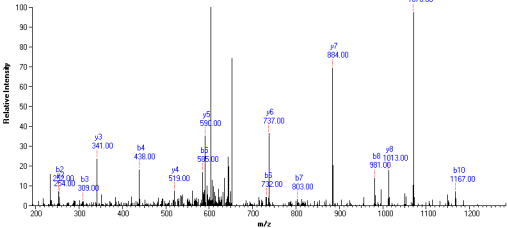

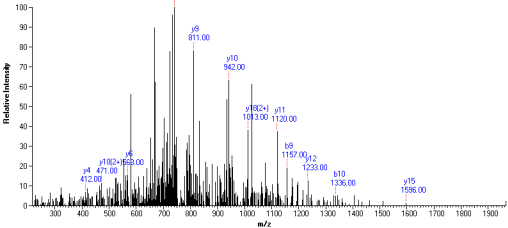



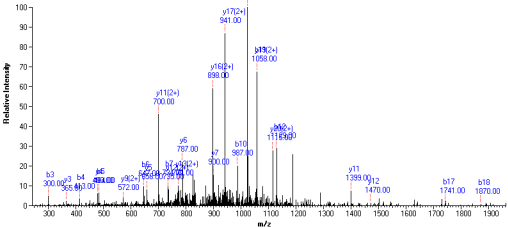

Peptide: DLDEIITIAGQELNEK(ac)GFR\_Charge: 3+\_m/z: 741.06\_MassError: 3.6371725ppm\_RetentionTime: 52.402min\_MascotScore: 61.52

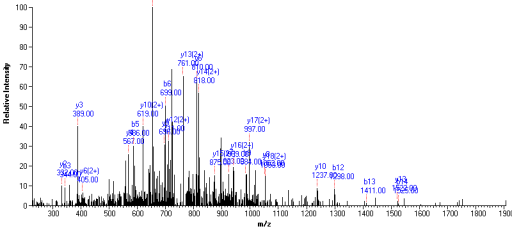

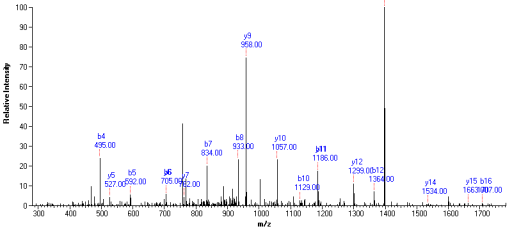

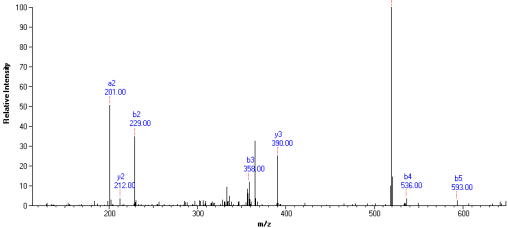

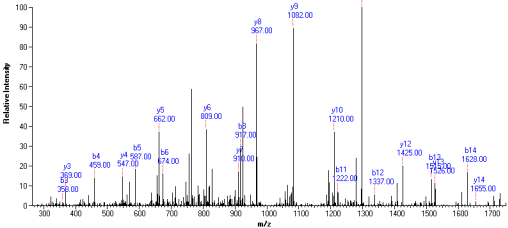

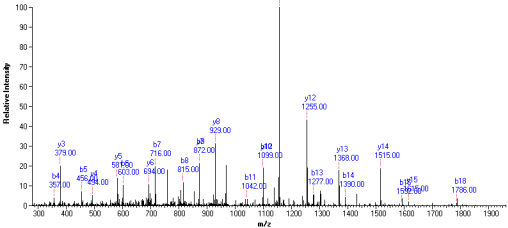

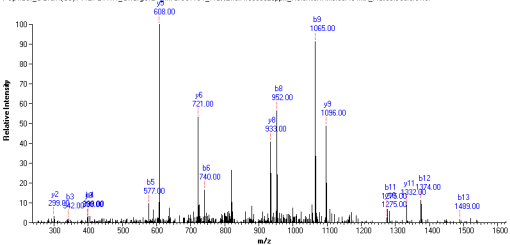

Peptide: \_DLK(ac)DAAVAR\_Charge: 2+\_m/z: 509.79\_MassError:0.068802705ppm\_RetentionTime:14.26min\_MascotScore:48.36

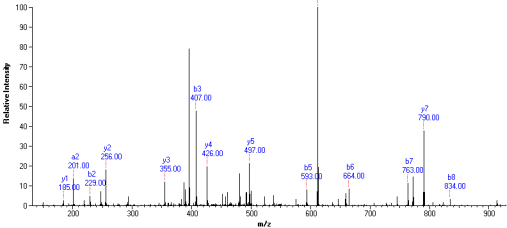



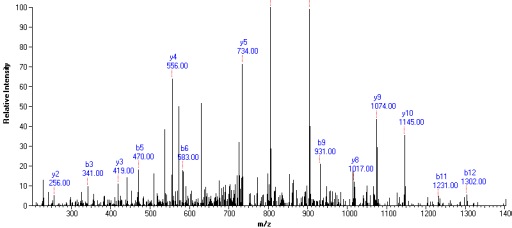

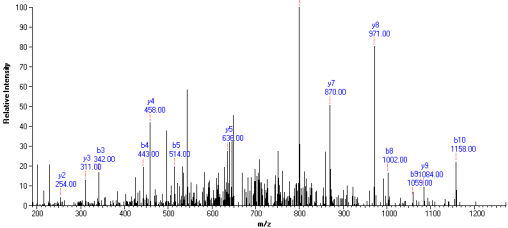

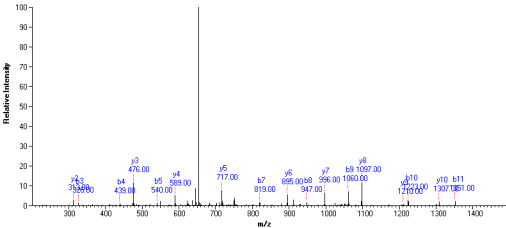

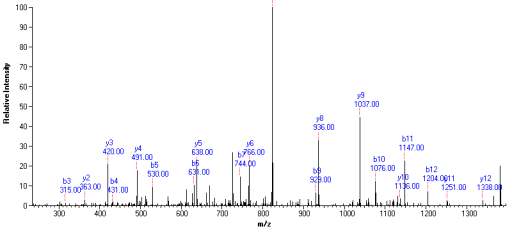

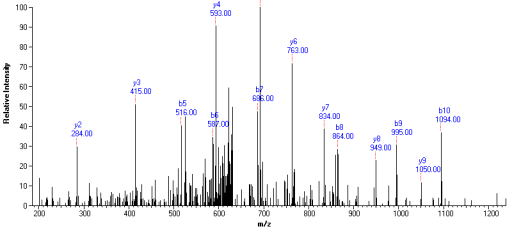

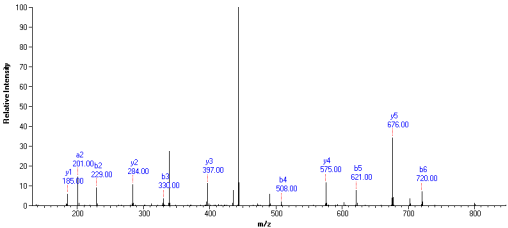

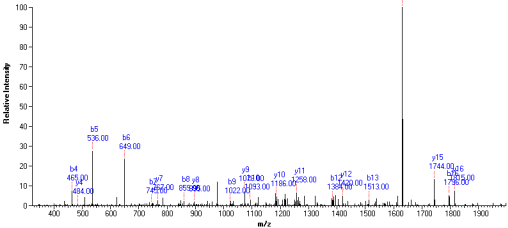

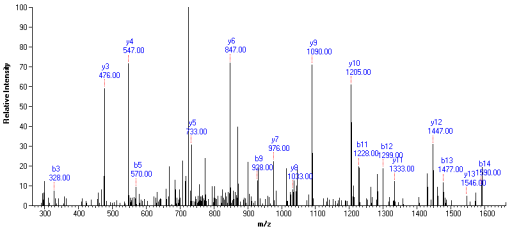



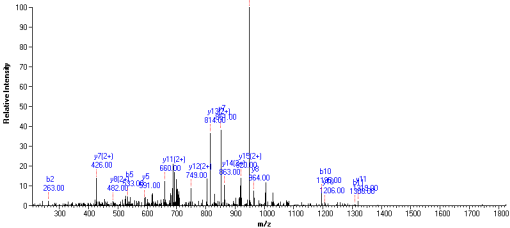

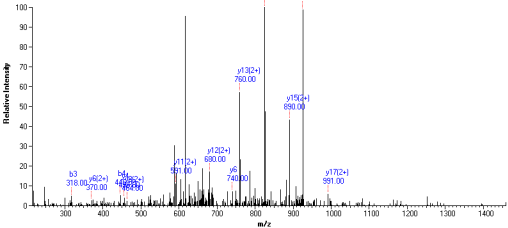

Peptide: \_DMLK(ac)AGYHFGHQTR\_Charge: 2+\_m/z: 828.92\_MassError: 1.4101299ppm\_RetentionTime: 20.154min\_MascotScore: 69.5

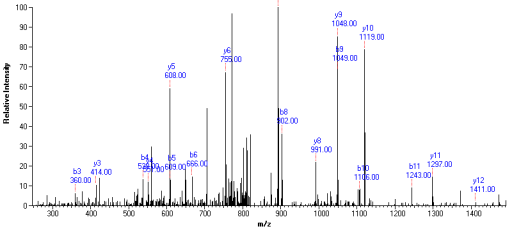

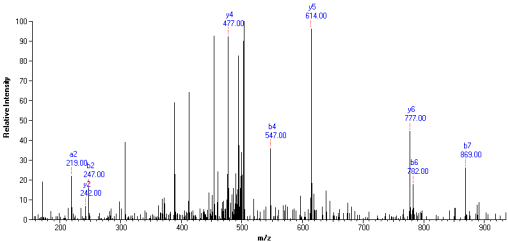

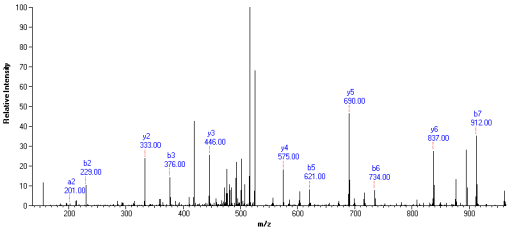

Peptide: **DNNLEK(ac)VIAGANVVR** Charge: 2+  $m/z$ : 871.98  $Mass\ Error$ : 2.34339ppm  $Retention\ Time$ : 44.384min  $Mascot\ Score$ : 50.29

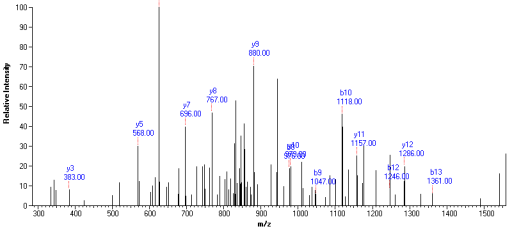

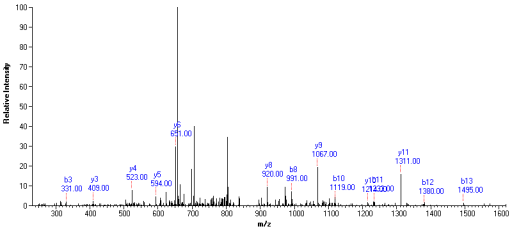

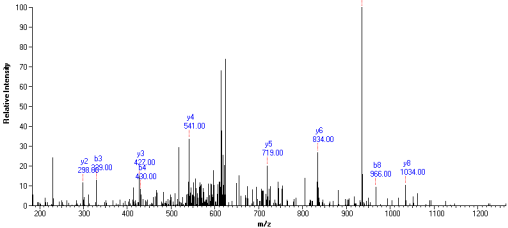



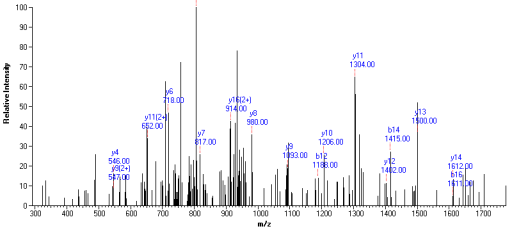

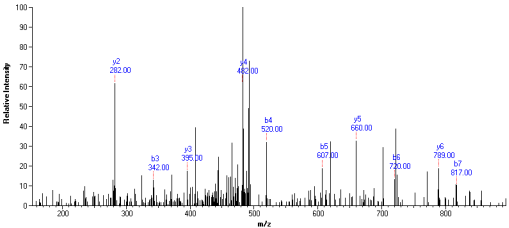

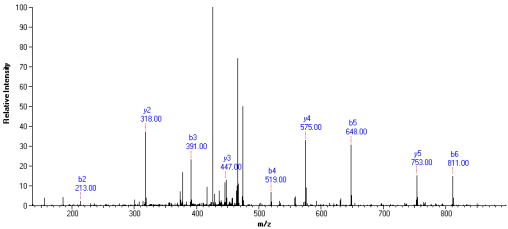

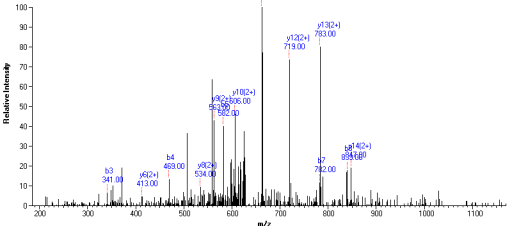

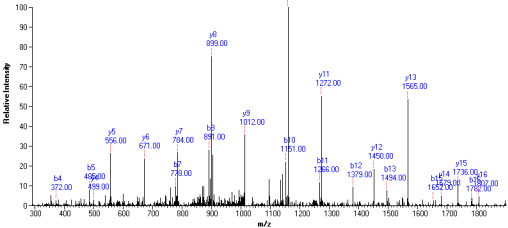

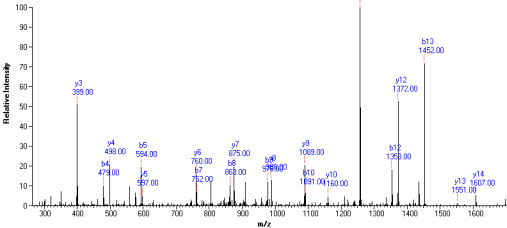

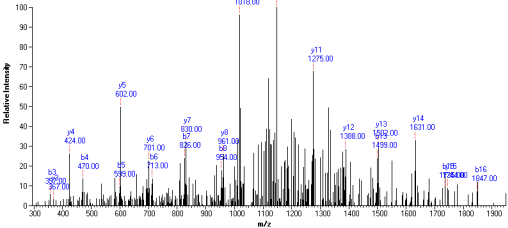

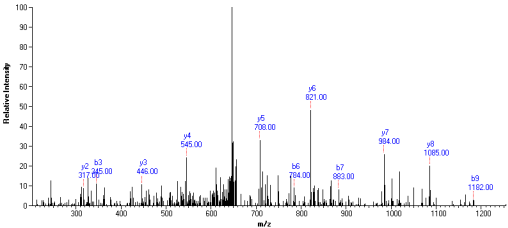



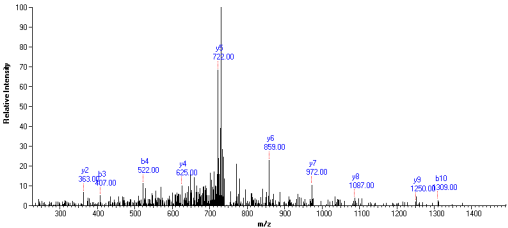

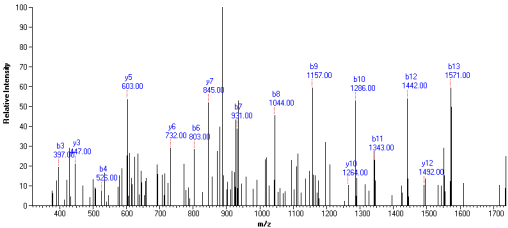

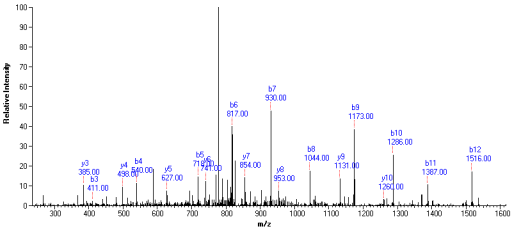

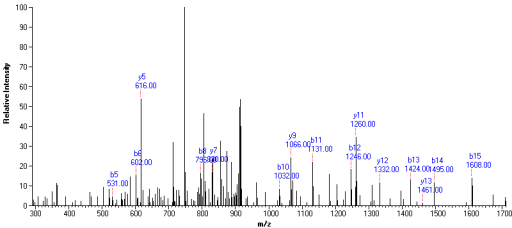

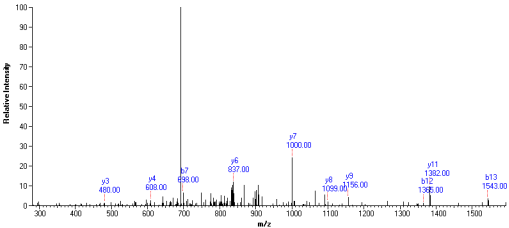

Peptide: \_DSQEYVSK(ac)K\_Charge: 2+\_m/z: 563.28\_MassError: 0.42544804ppm\_RetentionTime: 8.9125min\_MascotScore: 55.52

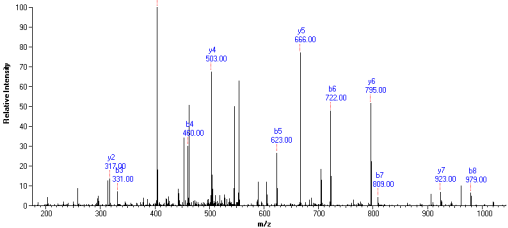

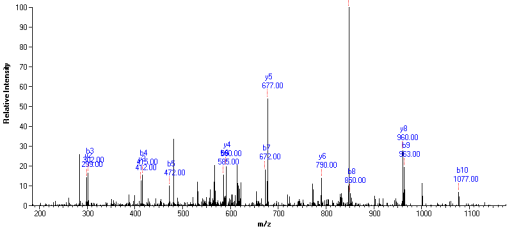

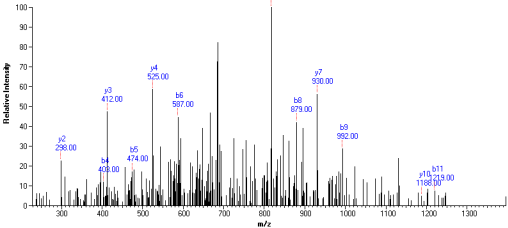



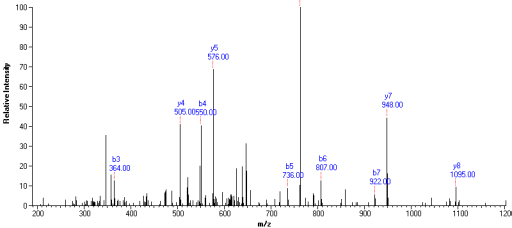

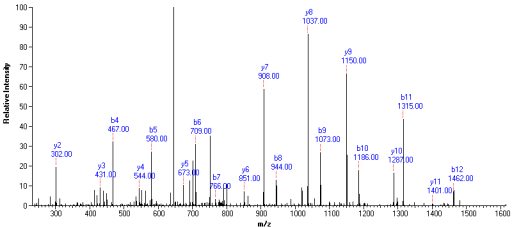

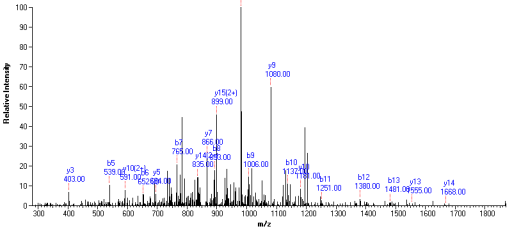

Peptide: \_DVDSIYK(ac)IPGLLK(Iy)\_Charge: 2+\_m/z: 759.94\_MassError: 3.1971955ppm\_RetentionTime: 44.961min\_MascotScore: 81.23

Relative Intensity

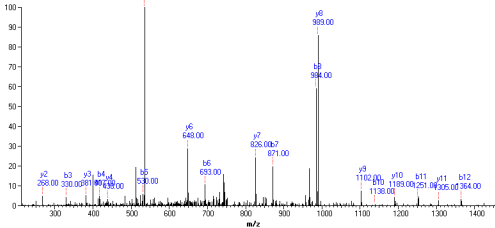

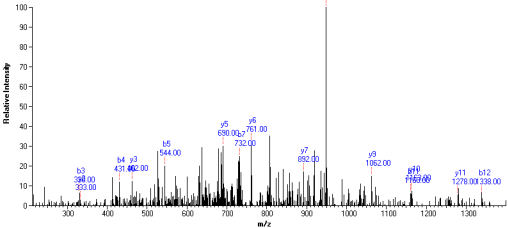

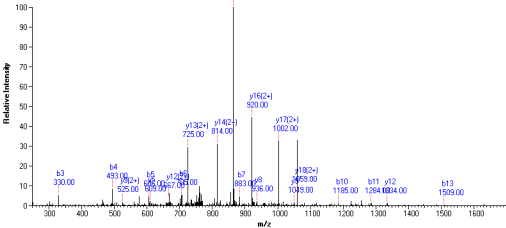

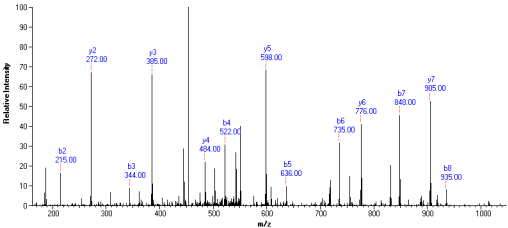

Peptide: \_DVFK(ac)SPK(Iy)\_Charge: 2+\_m/z: 439.75\_MassError: 2.5415946ppm\_RetentionTime: 11.731min\_MaxcotScore: 24.26

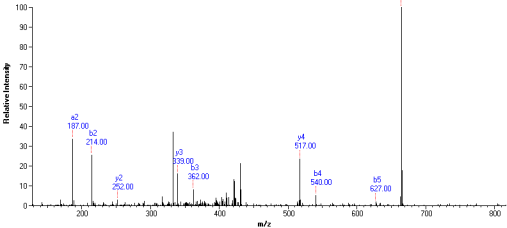



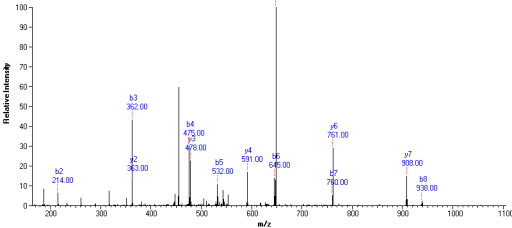

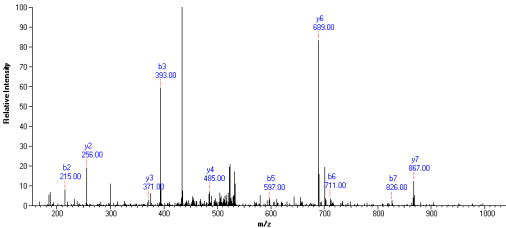

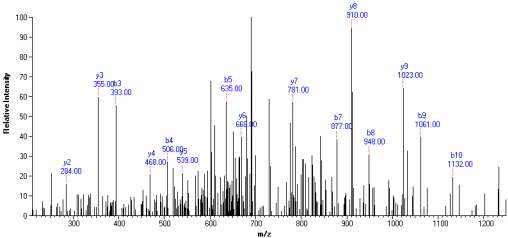

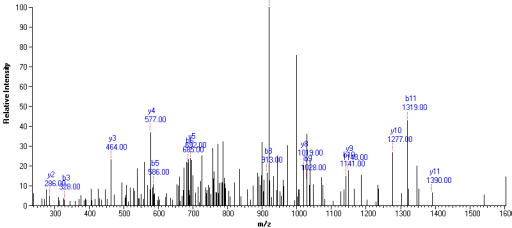

Peptide: \_DVLK(ac)FR\_Charge: 2+\_m/z: 419.25\_MassError: 2.7979974ppm\_RetentionTime: 24.958min\_MaxcotScore: 28.37

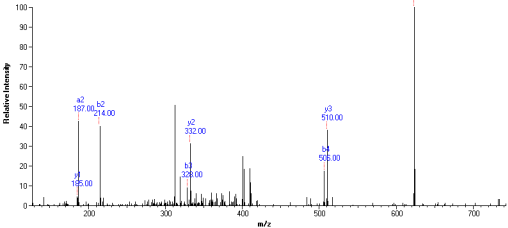

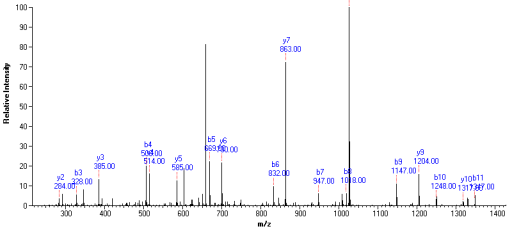

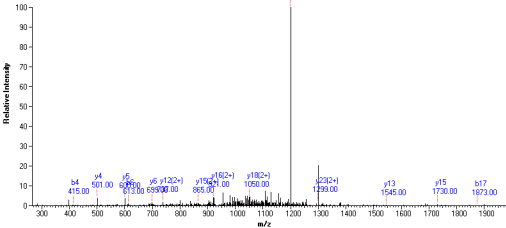

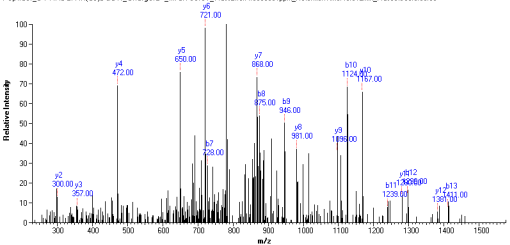



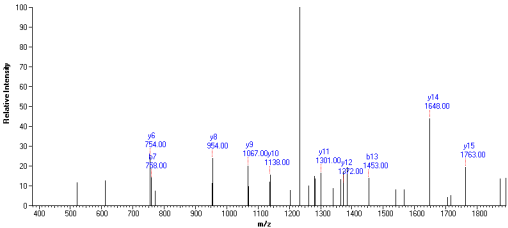

Peptide: \_DWFLK(ac)AAGDEK[ly]\_Charge: 2+\_m/z: 669.34\_MassError: 0.77209834ppm\_RetentionTime: 37.133min\_MascotScore: 67.48

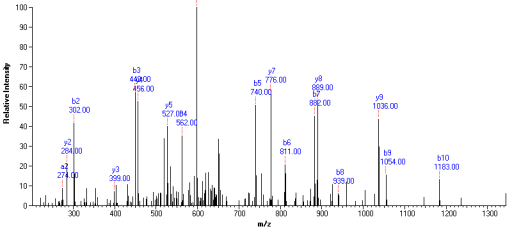

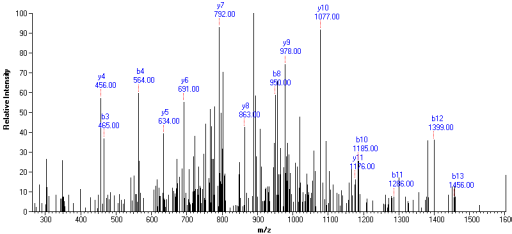

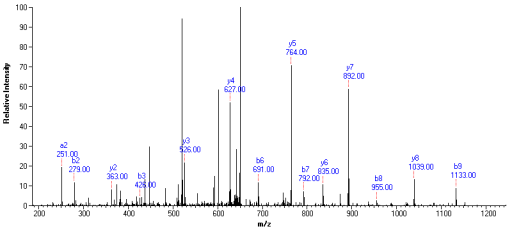

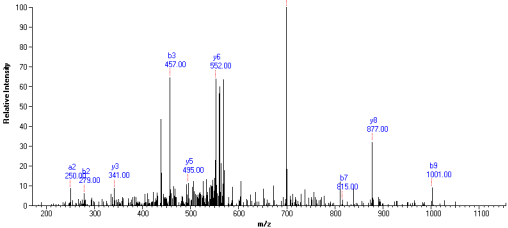

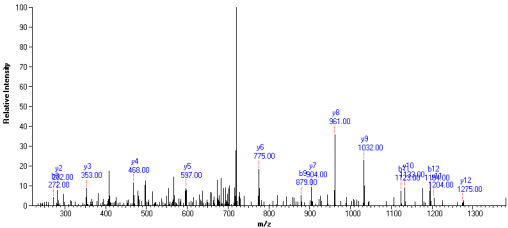

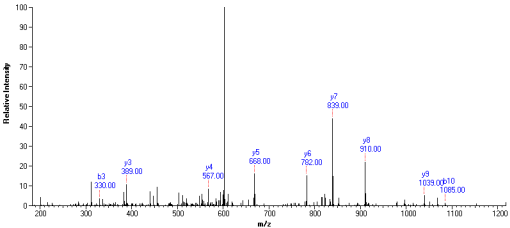

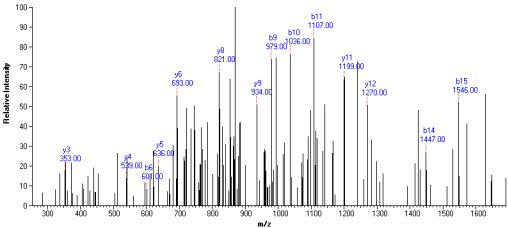



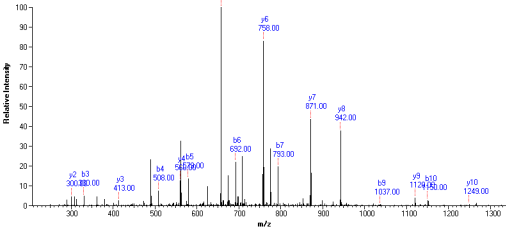

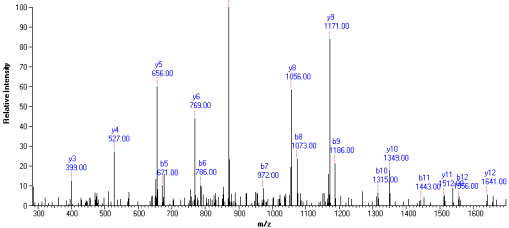

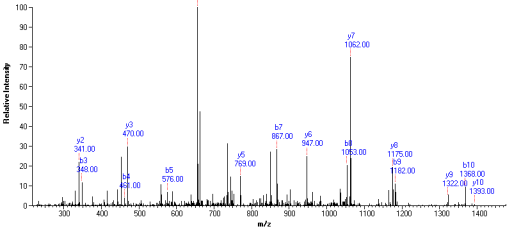

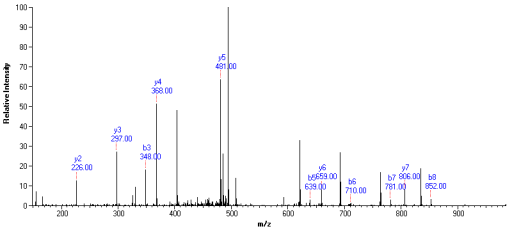

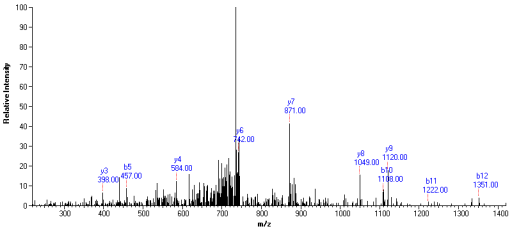

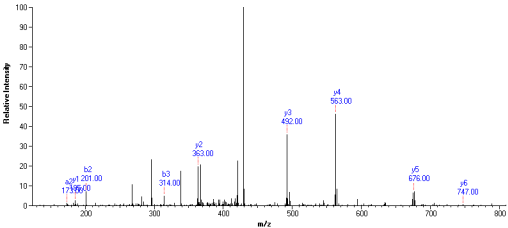

Peptide: \_EAK(ac)DLVESAPAALK(I)\_ Charge: 2+ \_m/z: 750.42\_MassError: 11174318ppm\_RetentionTime: 28.335min\_MascotScore: 87.84

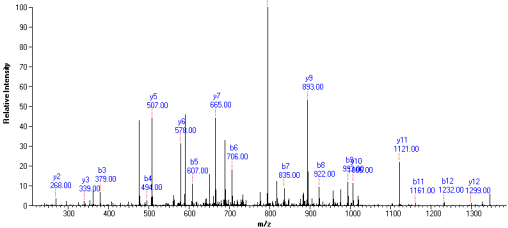

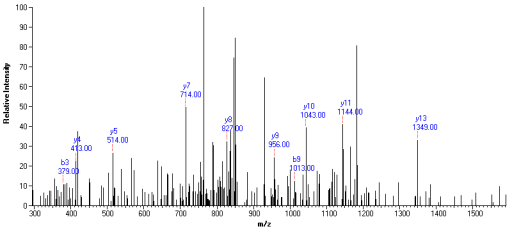



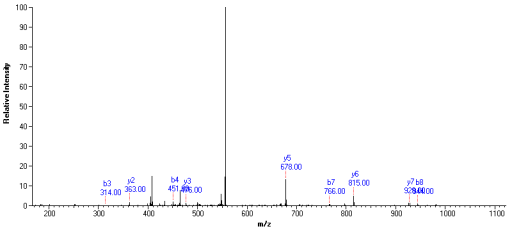

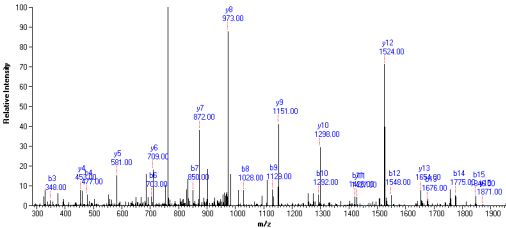

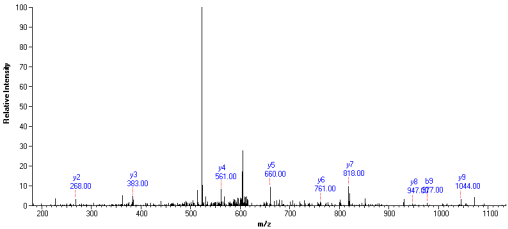

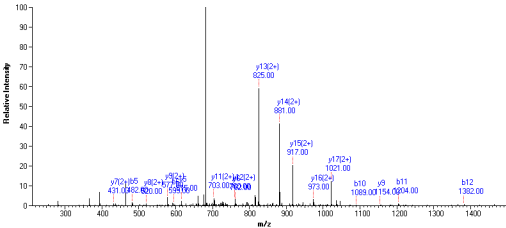

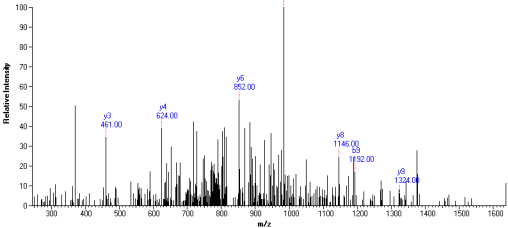

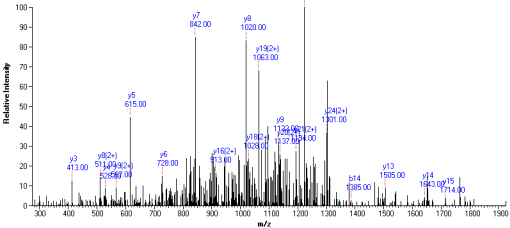

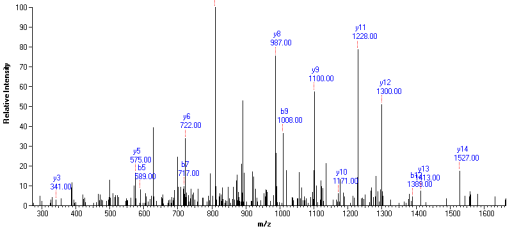

Peptide: \_EDGIYVTMEGK(ac)K(Iy)\_Charge:2+\_m/z:714.36\_MassError:3.3413916ppm\_RetentionTime:21.094min\_MascotScore:27.22

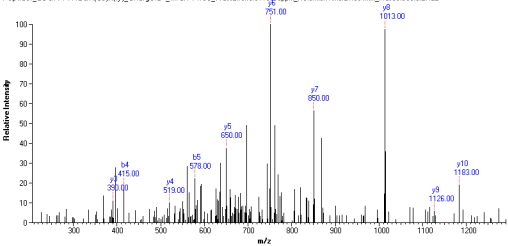



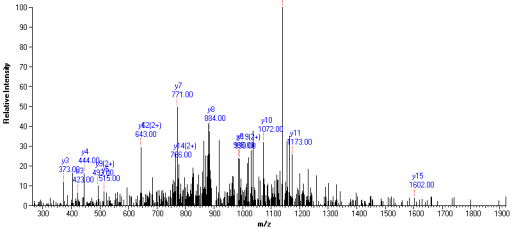

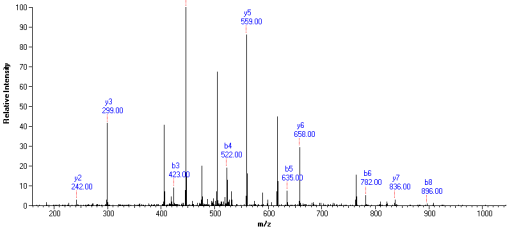

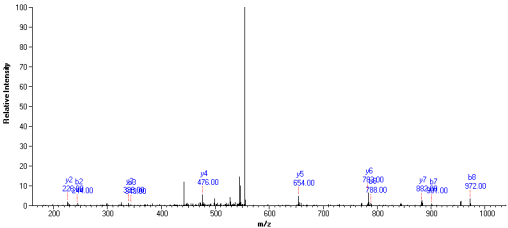

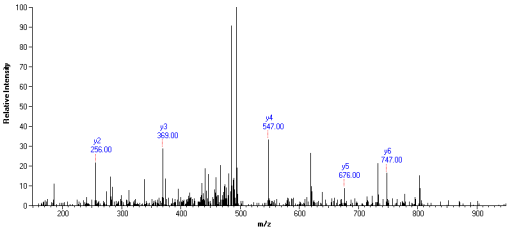

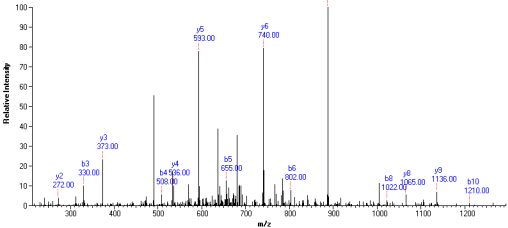

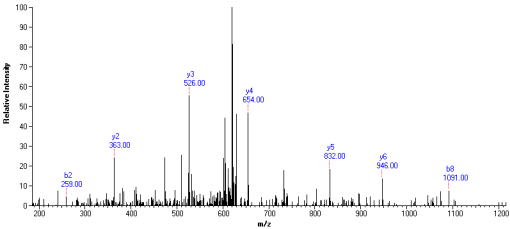

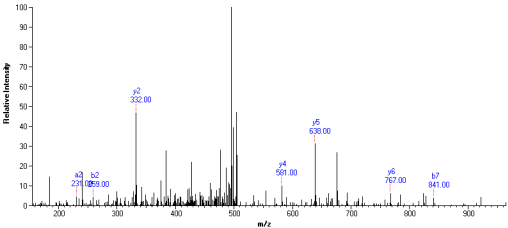

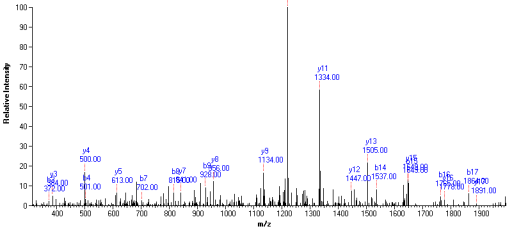



Peptide: \_EEK(ac)LALDLLEGIK(Iy)\_ Charge: 2+\_ m/z: 800.47\_MassError: 3.2896302ppm\_RetentionTime: 49.179min\_MascotScore: 50.59

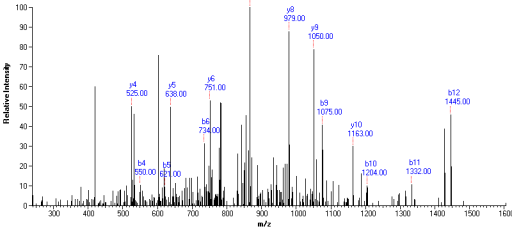

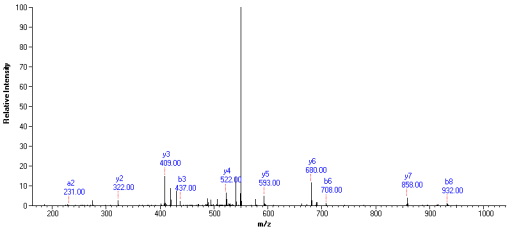

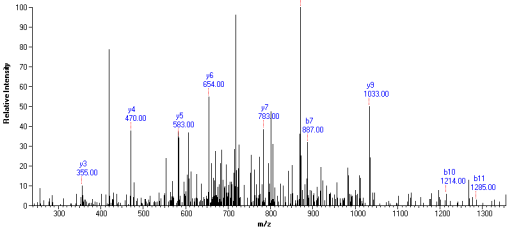

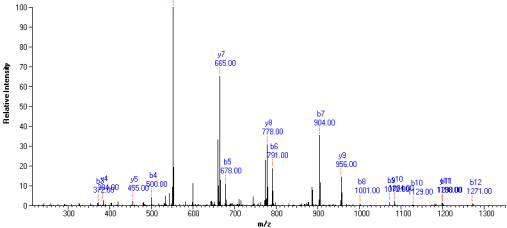

Peptide: \_EEM(ox)IK(ac)YFTLNAVSK(y)\_Charge:2+\_m/z: 873.95\_MassError:1.8186137ppm\_RetentionTime:35.987min\_MascotScore:62.08

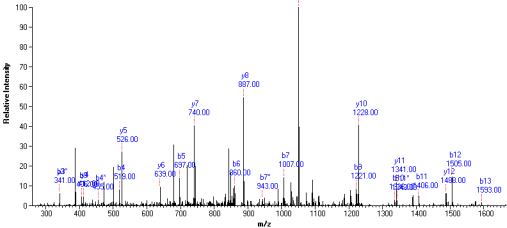

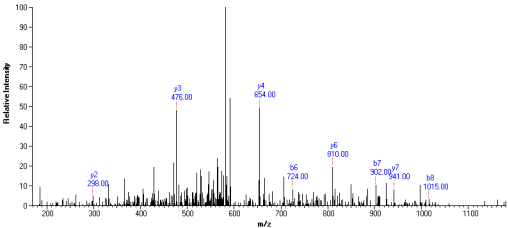

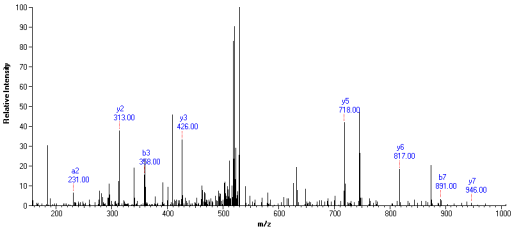

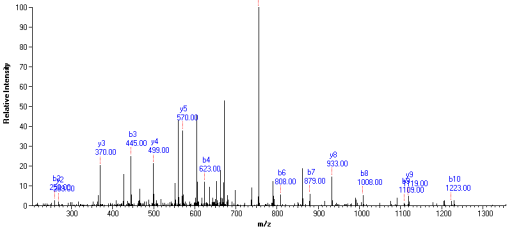



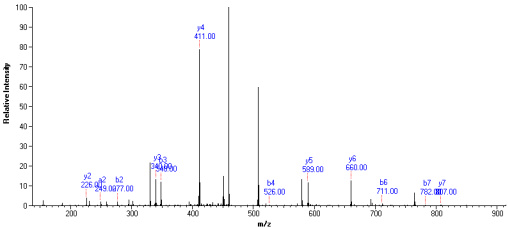

Peptide: \_EFGELK(ac)EETCR\_Charge: 2+\_m/z: 729.34\_MassError: 0.64498371ppm\_RetentionTime: 25.073min\_MascotScore: 75.26

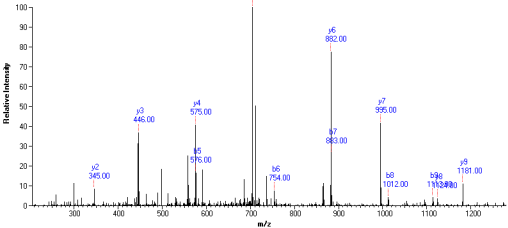

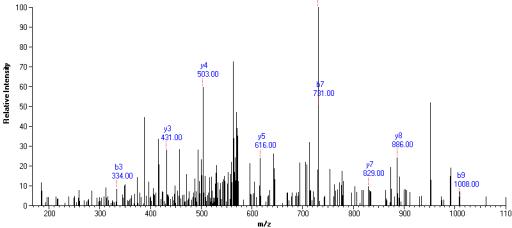

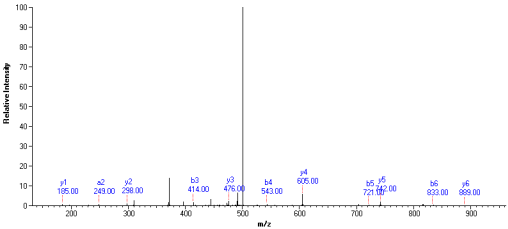

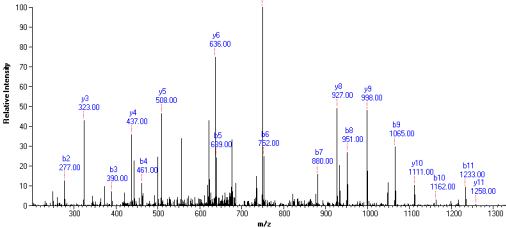

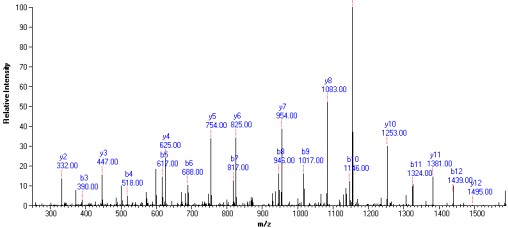

Peptide: \_EFNVEANVGK(ac)PGVAYR\_Charge: 2\*\_m/z: 940.99\_MassError: 2.0837641ppm\_RetentionTime: 30.023min\_MascotScore: 35.11

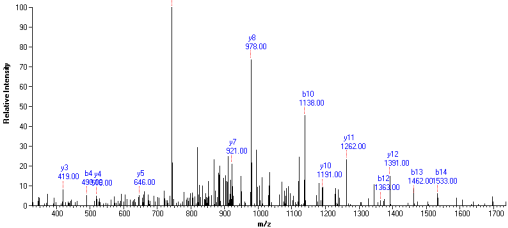

Peptide: \_EFSK(ac)LDYYGLK[ly]\_Charge: 2+\_m/z: 710.87\_MassError: 0.68050456ppm\_RetentionTime: 34.903min\_MascotScore: 51.22

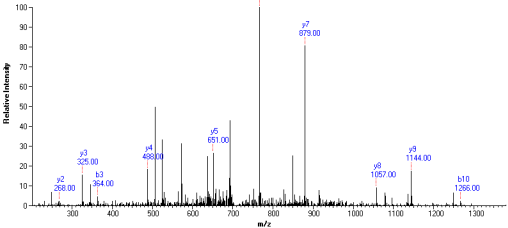



Peptide: \_EFYTAK(ac)FAK(ly)\_Charge: 2+\_m/z: 549.81\_MassError: 0.41221466ppm\_RetentionTime: 26.741min\_MascotScore: 35.77

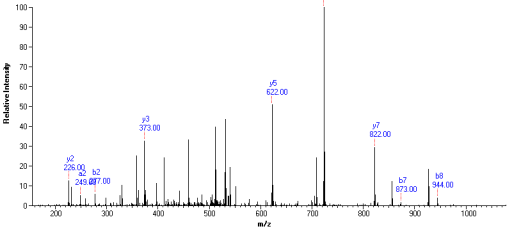

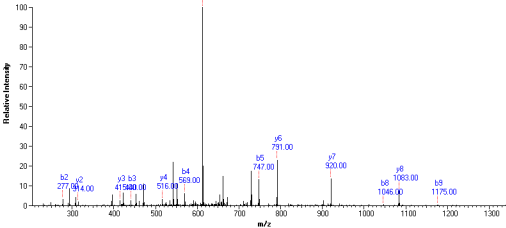

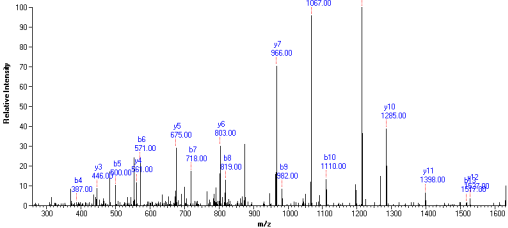

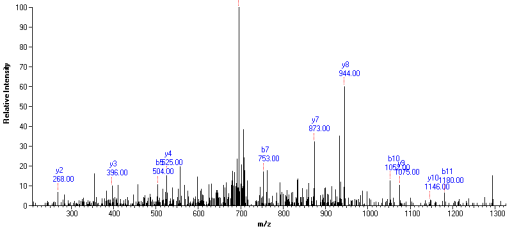

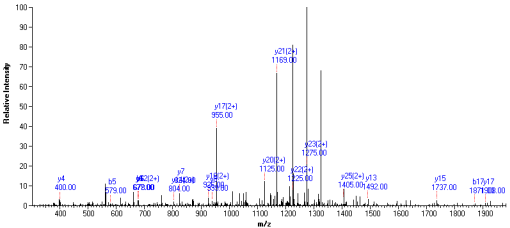

Peptide: \_EGEATLAPSLDLVGK(ac)\_ Charge: 2+\_ m/z: 831.96\_MassError:4.6516379ppm\_RetentionTime:50.372min\_MascotScore:24.57

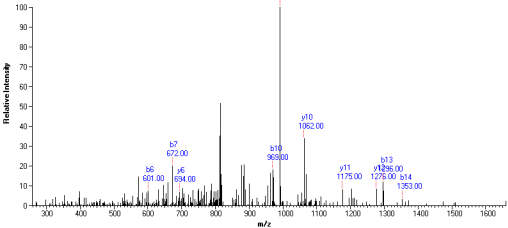

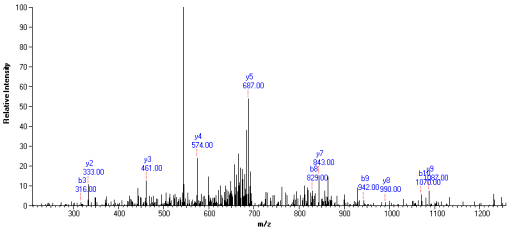

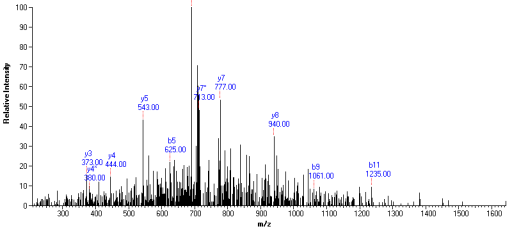



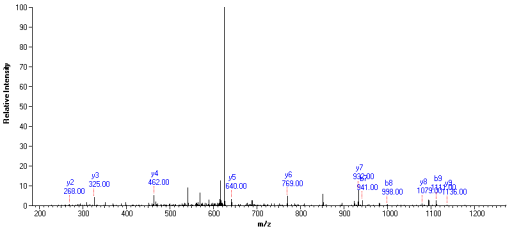

Peptide: \_EGGIDAYPVDPK(ac)EVDYIQLK(Iy)\_Charge:2+\_m/z:1116.07\_MassError:0.20397183ppm\_RetentionTime:37.164min\_MascotScore:31.44

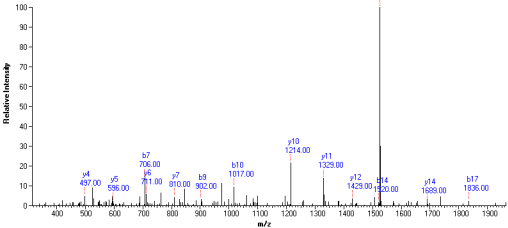

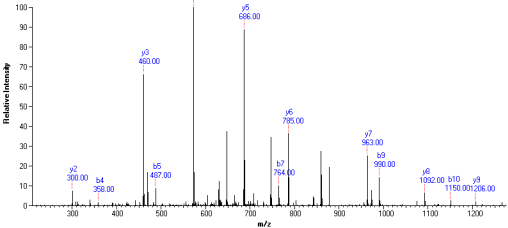

Peptide: \_EGIEK(ac)GIANSILIK(Iy)\_Charge: 2+\_m/z: 771.96\_MassError: 1.0961532ppm\_RetentionTime: 37.526min\_MascotScore: 65.16

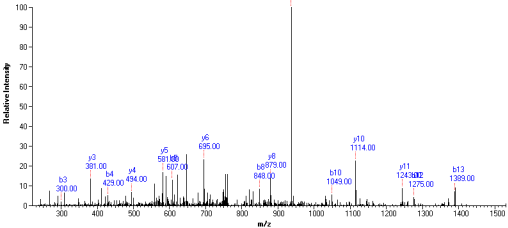

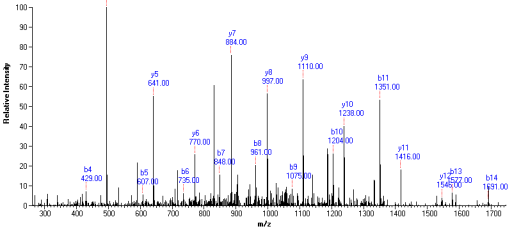

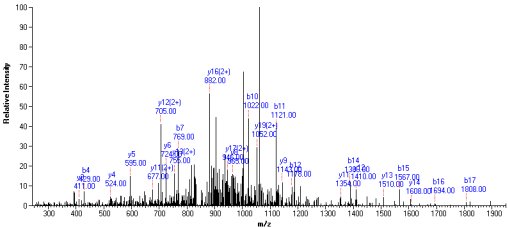

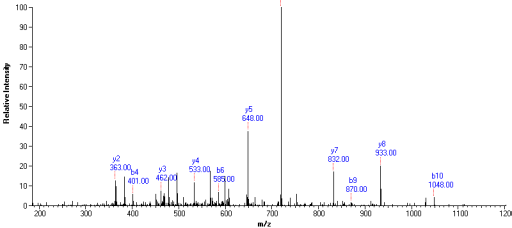

Peptide: \_EGIWIEK(ac)LEHNPGQYIQELR\_Charge: 3+\_m/z: 870.46\_MassError: 3.6864842ppm\_RetentionTime: 46.329min\_MascotScore: 34.02

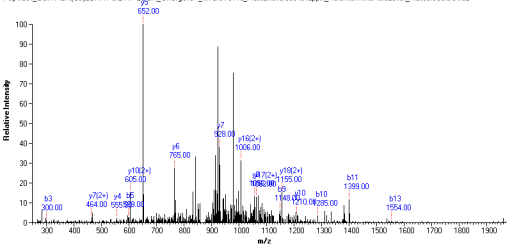



Peptide: \_EGK(ac)VFLNIGDK(Iy)\_Charge: 2+\_m/z: 639.36\_MassError: 1.7596379ppm\_RetentionTime: 25.691min\_MascotScore: 45.37

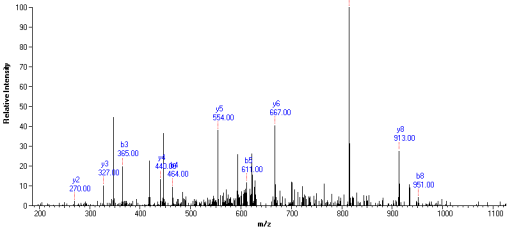

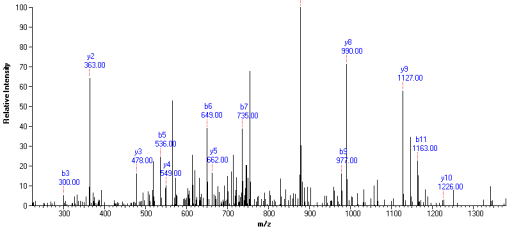

Peptide: \_EGMIQK(ac)IDK(Iy)\_Charge: 2+\_m/z: 560.31\_MassError: 0.53943874ppm\_RetentionTime: 18.769min\_MascotScore: 31.2

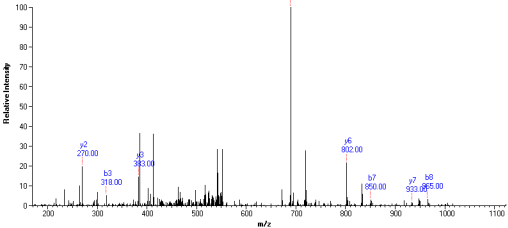

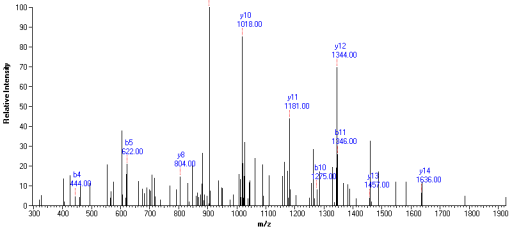

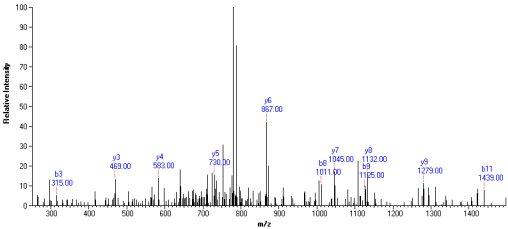

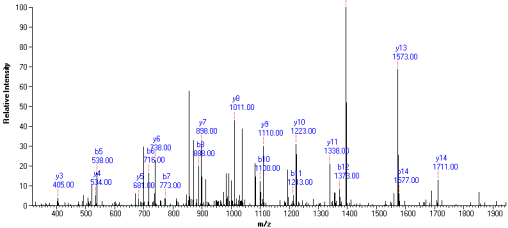

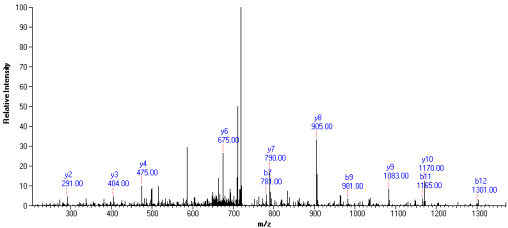

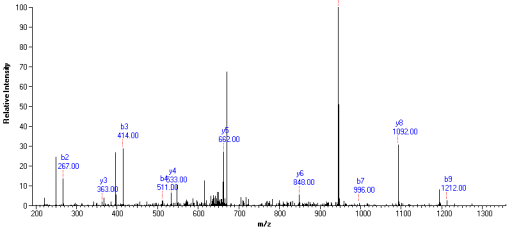



Peptide: \_EHHWVTYAEVEIDK(ac)LHALR\_Charge: 3+\_m/z: 803.08\_MassError: 0.17726194ppm\_RetentionTime: 40.135min\_MascotScore: 61.74

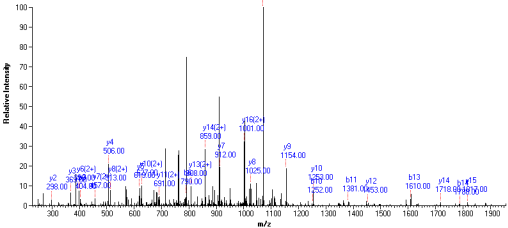

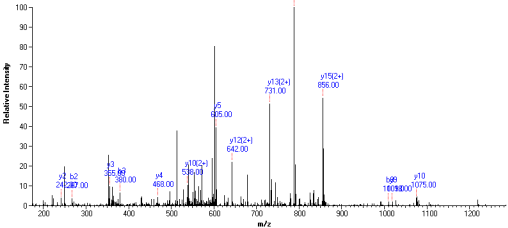

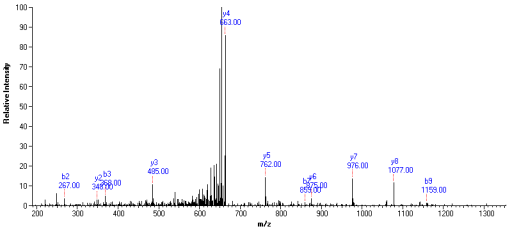

Peptide: \_EIAAK(ac)LGR\_Charge:2+\_m/z: 459.29\_MassError:-2117.1189ppm\_RetentionTime:18.233min\_MascotScore:38.13

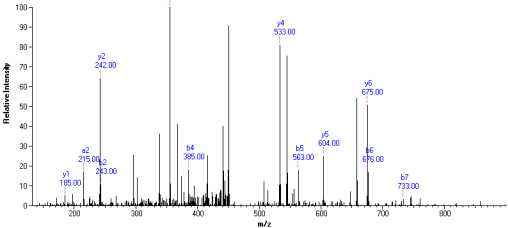

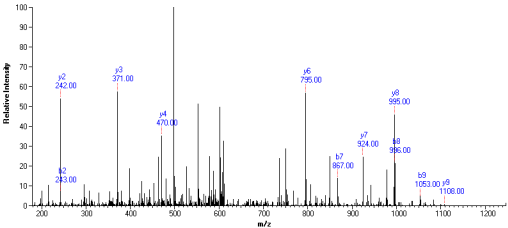

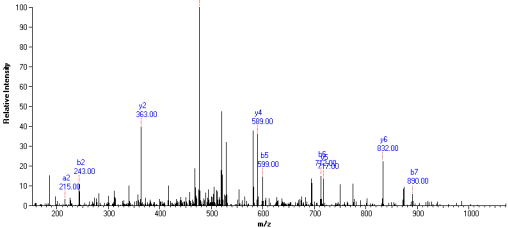

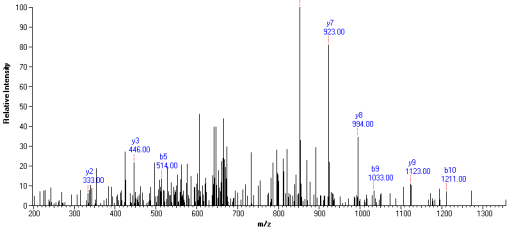

Peptide: \_EIEIYK(ac)QELR\_Charge: 2+\_m/z: 690.88\_MassError: 0.94079591ppm\_RetentionTime: 24.276min\_MascotScore: 61.82

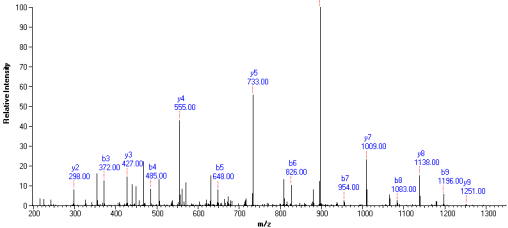



Peptide: \_EIGAAIQK(ac)FVEAEGFSYVR\_Charge: 3+\_m/z: 704.38\_MassError: -0.16722319ppm\_RetentionTime: 50.795min\_MascotScore: 55.89

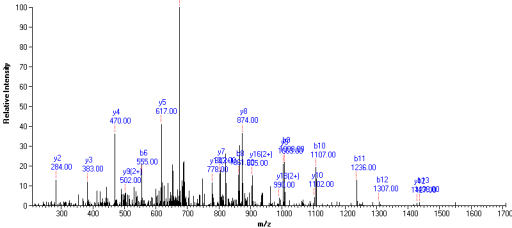

Peptide: \_EIK(ac)ELLPPVALLEK([y]<sub>Charge</sub>: 2+<sub>m/z</sub>: 825.51<sub>Mass Error</sub>: 1.35764ppm<sub>Retention Time</sub>: 47.829min<sub>Mascot Score</sub>: 21.5

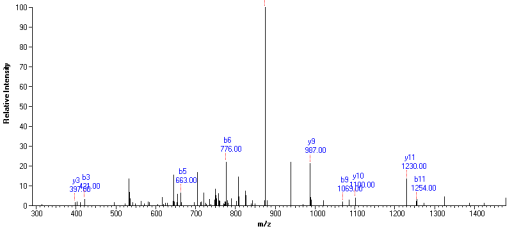

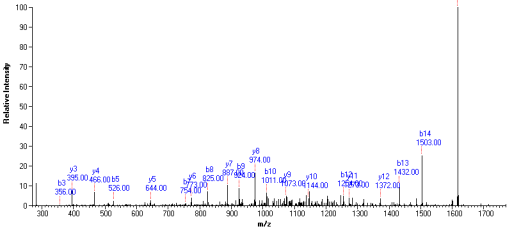

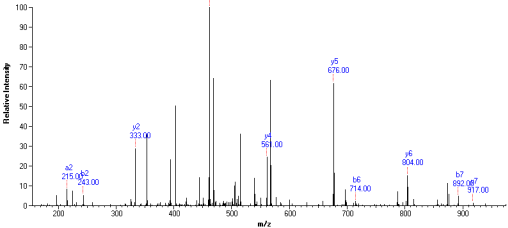

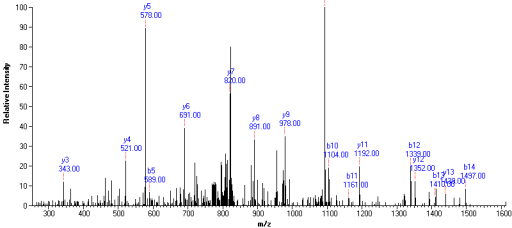

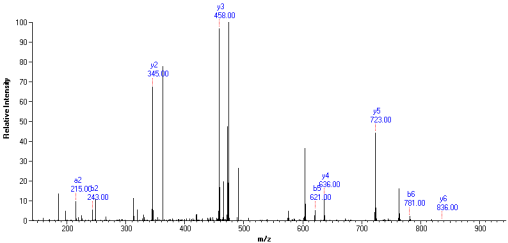

Peptide: \_EISMSIK(ac)R\_Charge: 2+\_m/z: 512.28\_MassError: 0.11036248ppm\_RetentionTime: 17.424min\_MascotScore: 20.95

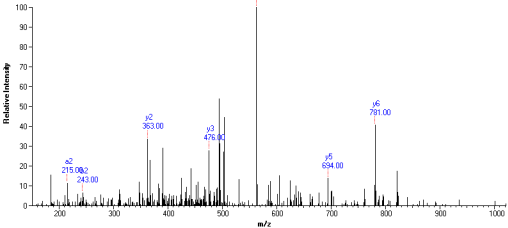

Relative Intensity

100

90

80

70

60

50

40

30

20

10

0

200

300

400

500

600

700

800

900

1000

m/z

b2

243.00

b3

344.00

y3

309.00

y4

422.00

y5

521.00

y6

650.00

b5

661.00

b6

750.00

y7

829.00

b7

863.00

y8

929.00

b8

960.00

b9

1017.00



Relative Intensity

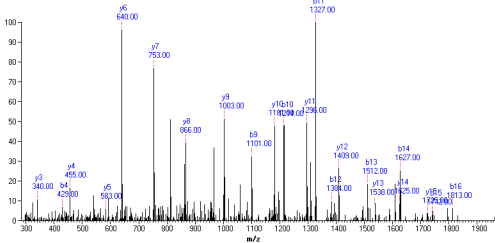

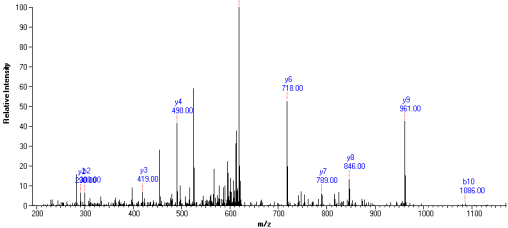

Peptide: \_EK[ac]DPSLSFR\_Charge: 2+\_m/z: 569.8\_MassError: 2.0575618ppm\_RetentionTime: 17.756min\_MascotScore: 34.33

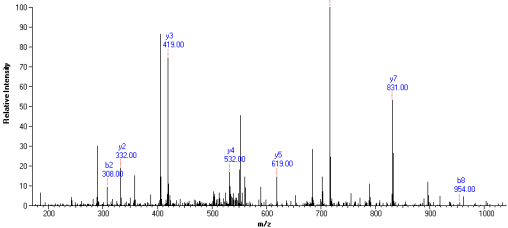

Peptide: \_EK[ac]FGFLLDALK (ly)\_Charge: 2+\_m/z: 669.89\_MassError: 1.3903366ppm\_RetentionTime: 50.09min\_MascotScore: 62.14

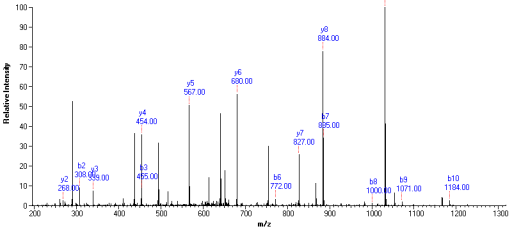

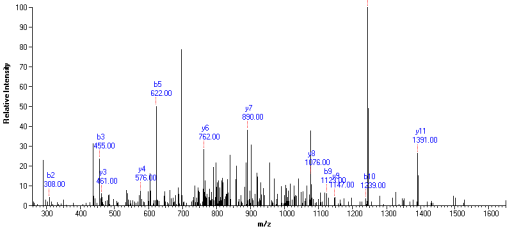

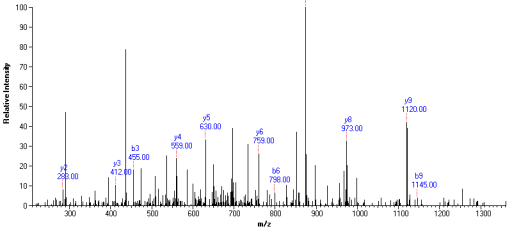

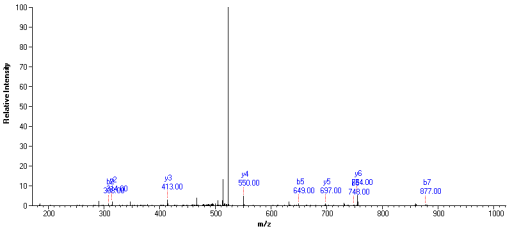

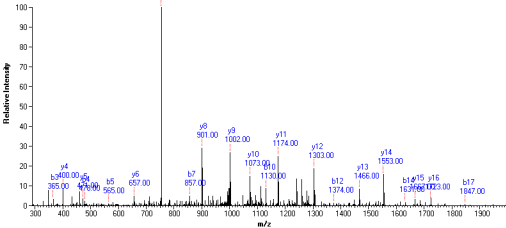



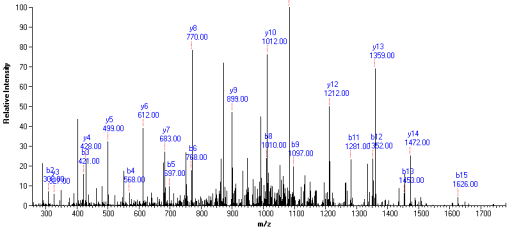

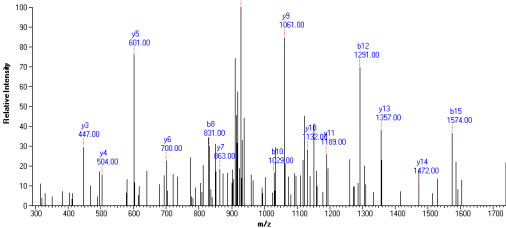

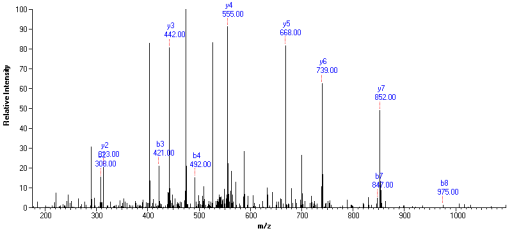

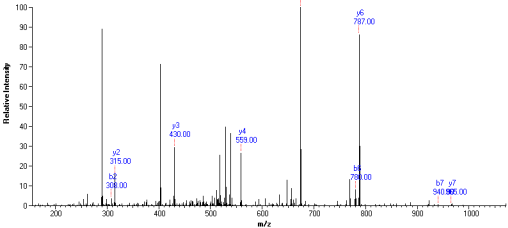

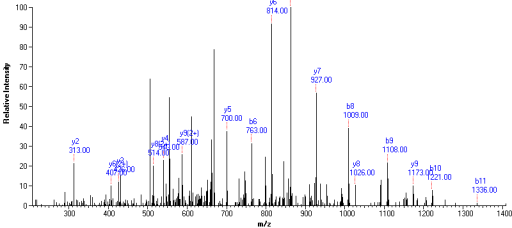

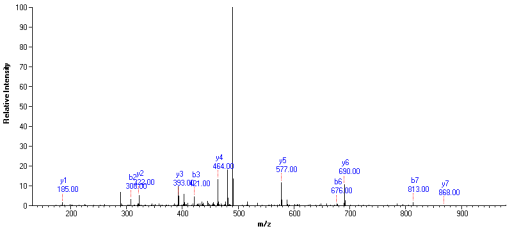

Peptide: \_EK[ac]LLSLLR\_Charge: 2+\_m/z: 516.33\_MassError: 0.67715192ppm\_RetentionTime: 35.935min\_MascotScore: 35.13

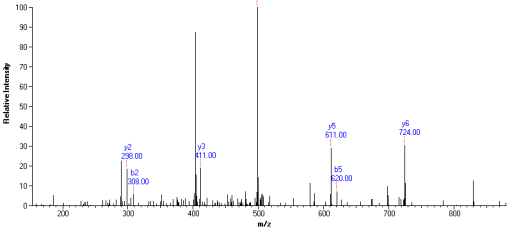

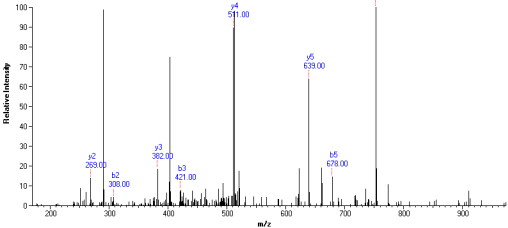



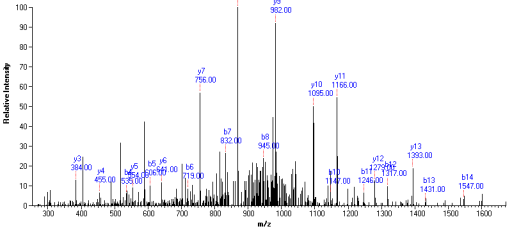

Peptide: \_EK[ac]PTWLEVDAGK[ly]\_ Charge: 2+\_m/z: 715.88\_MassError: 1.8558819ppm\_RetentionTime: 26.465min\_MascotScore: 27.87

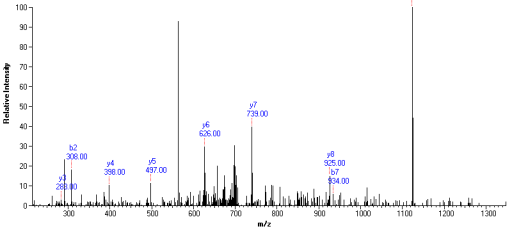

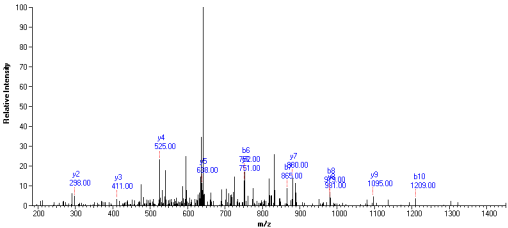

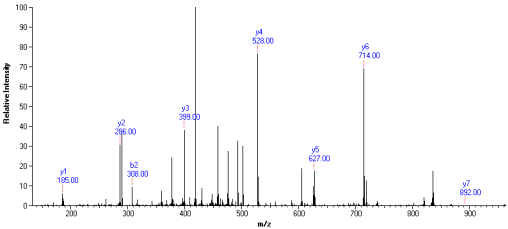

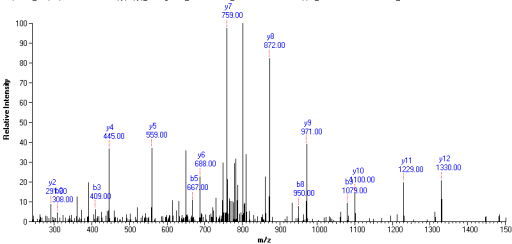

Peptide: \_EK[ac]VDA TK[ly]\_ Charge: 2+\_m/z: 424.74\_MassError: 2.184214ppm\_RetentionTime: 2.4071min\_MascotScore: 27.14

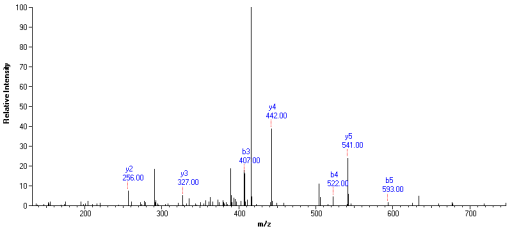

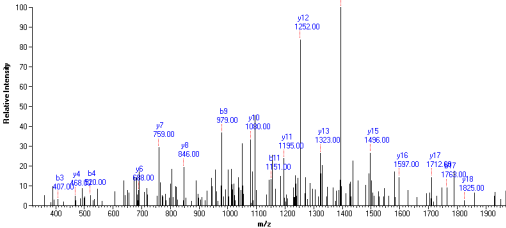

Peptide: \_EK[ac]VIEQER\_Charge: 2+\_m/z: 545.8\_MassError: 0.67974735ppm\_RetentionTime: 12.683min\_MascotScore: 38.34

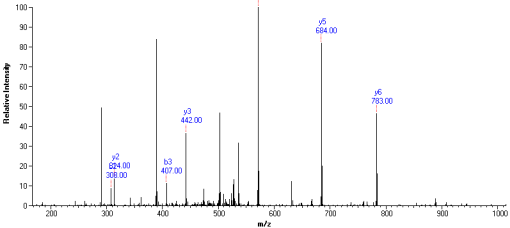



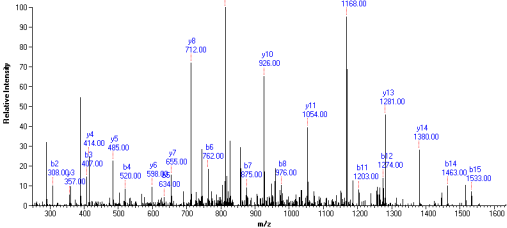

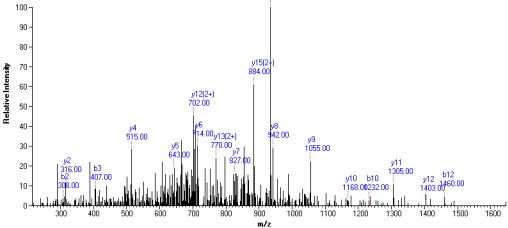

Peptide: \_EK(IY)PTWLEVDAGK(ac)MEGTFK(IY)\_Charge: 2+\_m/z: 1066.54\_MassError: -1.0991654ppm\_RetentionTime: 40.881min\_MascotScore: 78.4

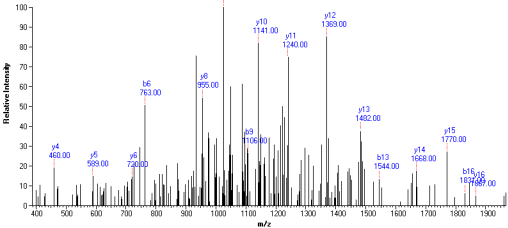

Peptide: \_ELEFK[ac]VIK[ly]\_ Charge: 2+  $m/z$ : 532.32\_MassError: 0.42475713ppm\_RetentionTime: 25.552min\_MascotScore: 28.56

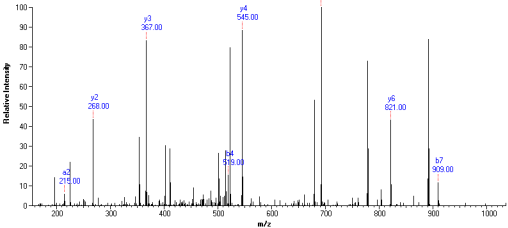

Peptide: \_ELEK(ac)LENSLGGIK(Iy)\_Charge:2+\_m/z:744.42\_MassError:-1367.1617ppm\_RetentionTime:28.835min\_MascotScore:63.5

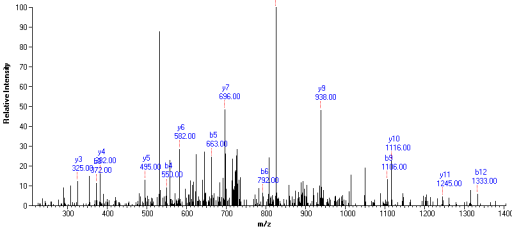

Peptide: \_ELEK(ac)PGR\_Charge: 2+\_m/z: 444.75\_MassError: 1.6874532ppm\_RetentionTime: 14.307min\_MascotScore: 27

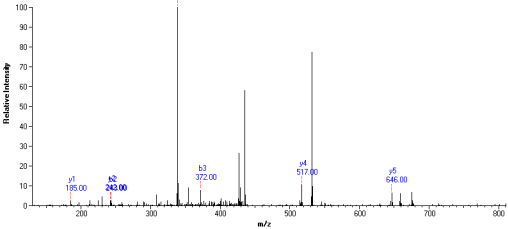

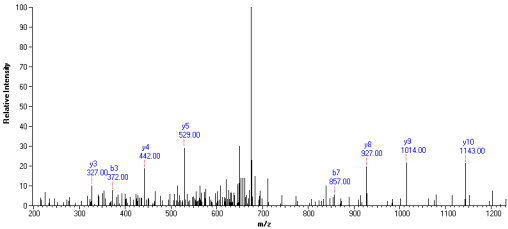

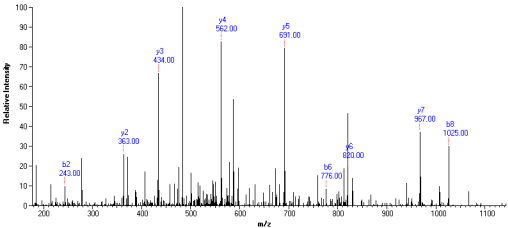



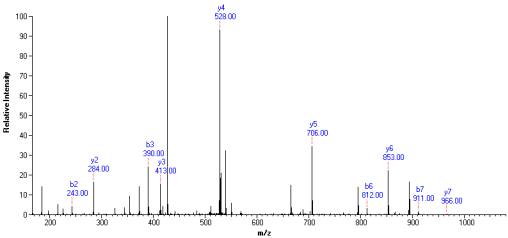

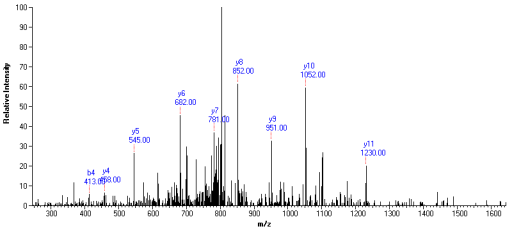

Peptide: \_ELIDAGK(ac)ELPQYIK(Iy)\_Charge: 2+\_m/z: 837.97\_MassError: -0.50134621ppm\_RetentionTime: 37.334min\_MascotScore: 31.88

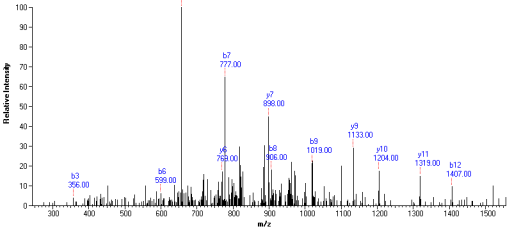

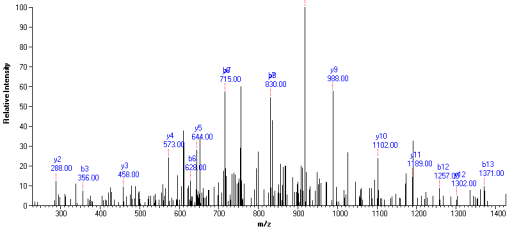

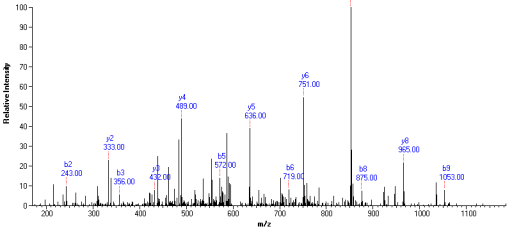

Peptide: \_ELK(ac)AVQDVILK(Iy)\_Charge: 2+\_m/z: 657.41\_MassError: 1.3300979ppm\_RetentionTime: 32.556min\_MascotScore: 53.71

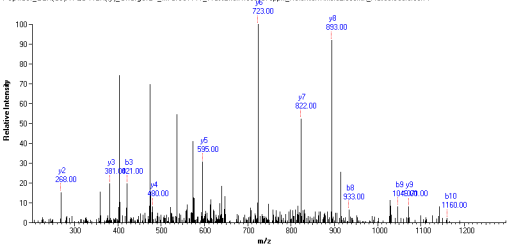

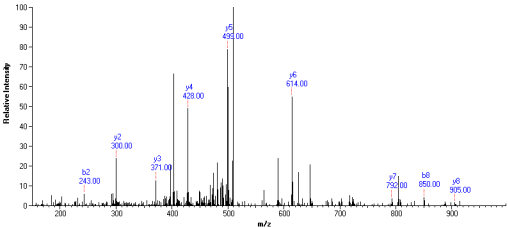

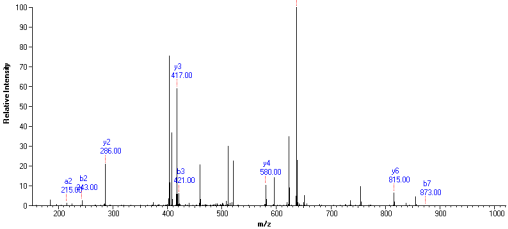



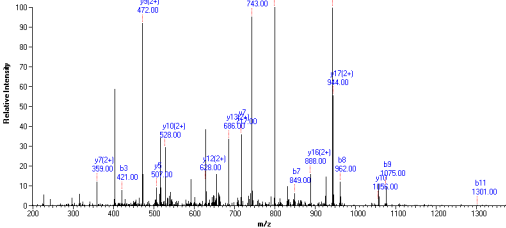

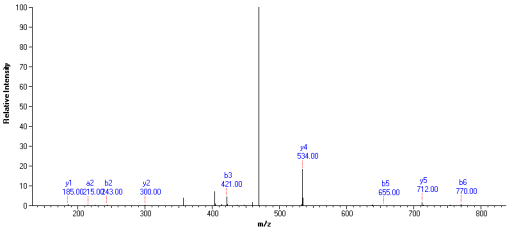

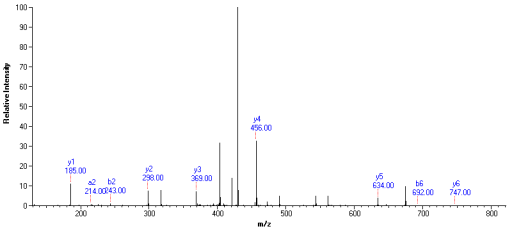

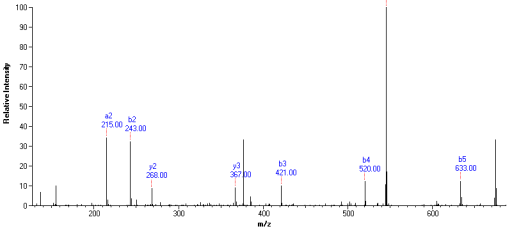

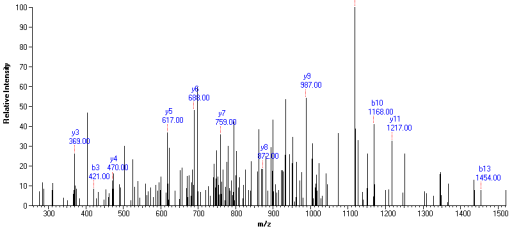

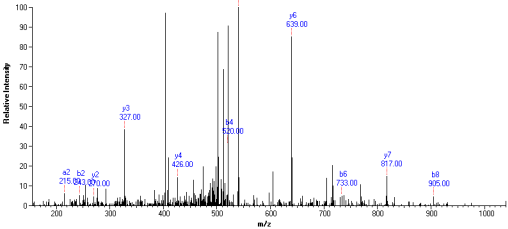

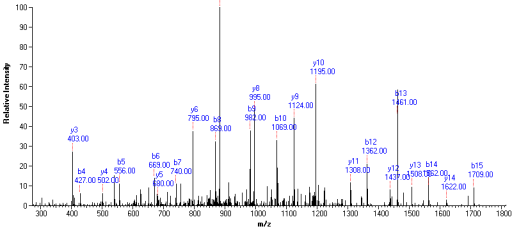

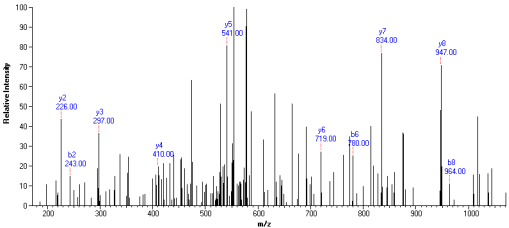



Peptide: \_ELLK(ac)LGDLPTSGQIR\_Charge:2+\_m/z:850.49\_MassError:1.6148728ppm\_RetentionTime:31.647min\_MascotScore:52.28

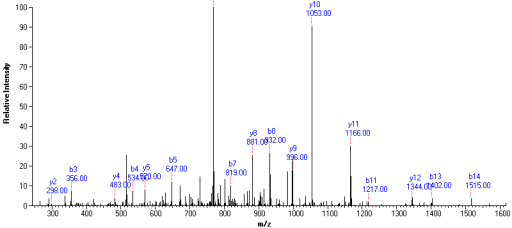

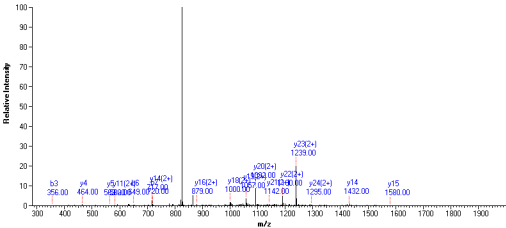

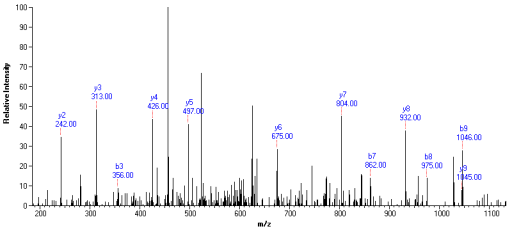

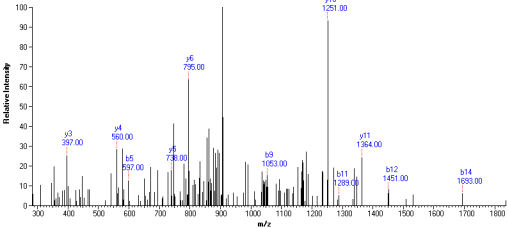

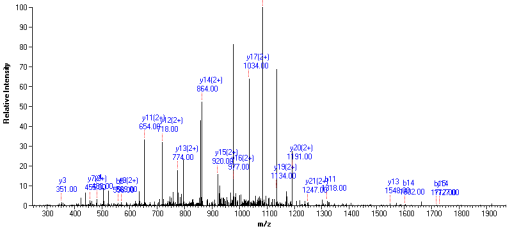

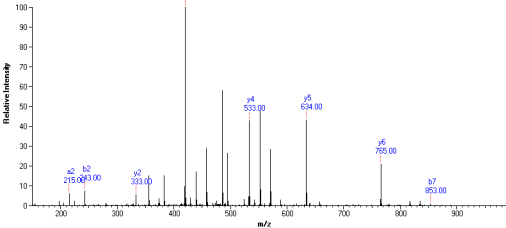

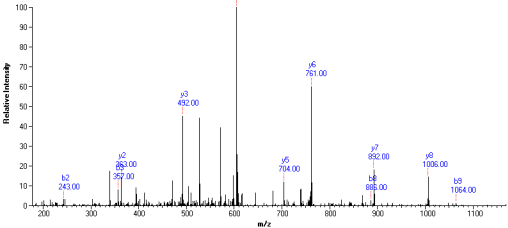

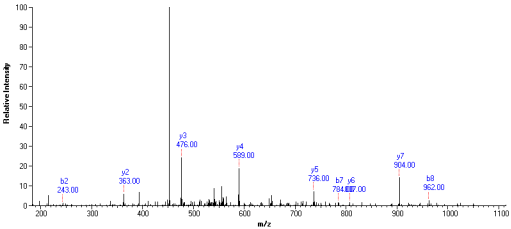



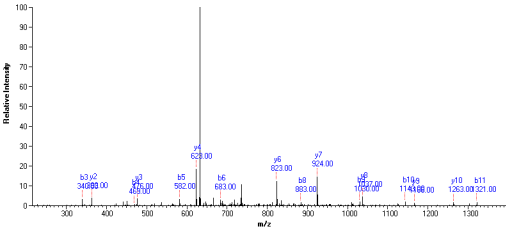

Peptide: \_ELTYK(ac)ANDYLK(ly)\_Charge: 2+\_m/z: 676.38\_MassError: 0.24580577ppm\_RetentionTime: 27.276min\_MascotScore: 47.5

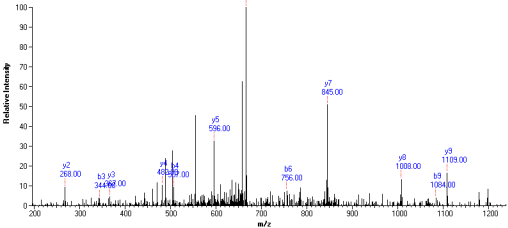

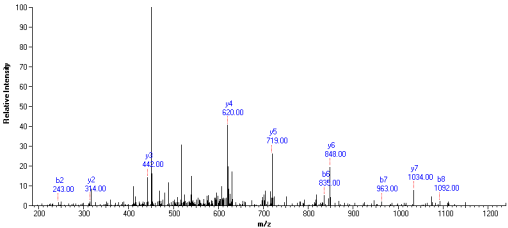

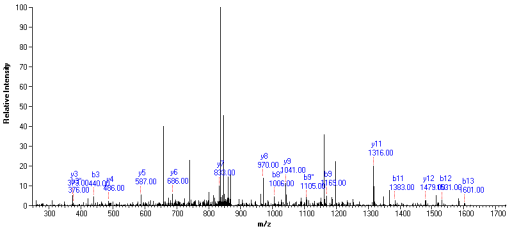

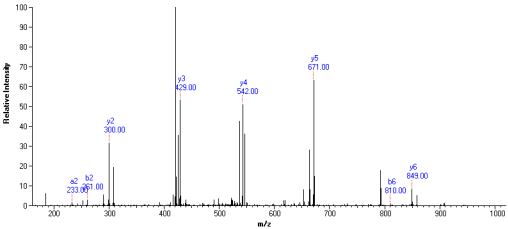

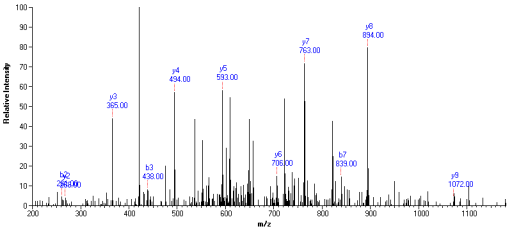

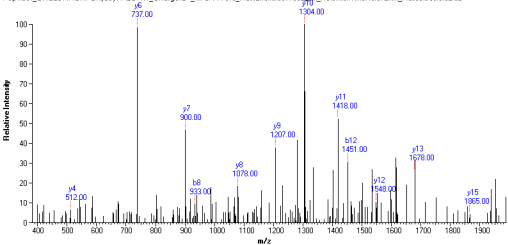

Peptide: \_EMSEK(ac)LQAHAEK(Iy)\_Charge: 2+\_m/z: 729.87\_MassError: 2.8264161ppm\_RetentionTime: 10.149min\_MascotScore: 45.71

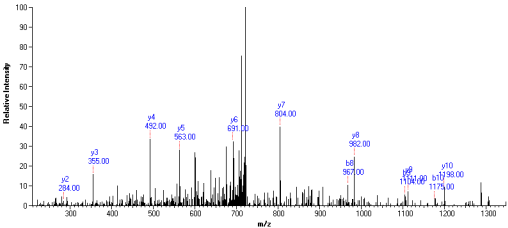



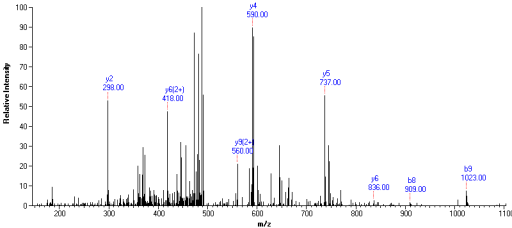

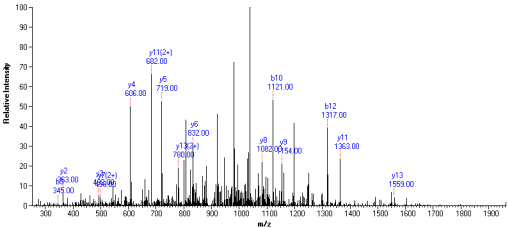

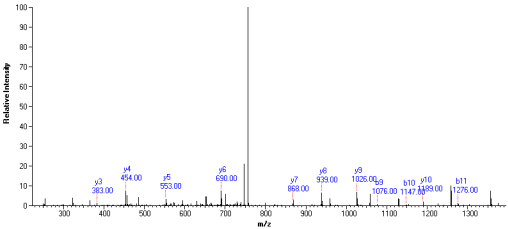

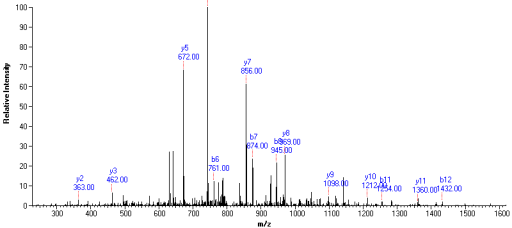

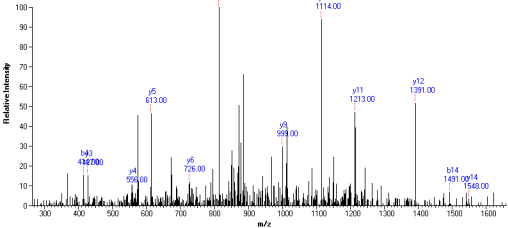

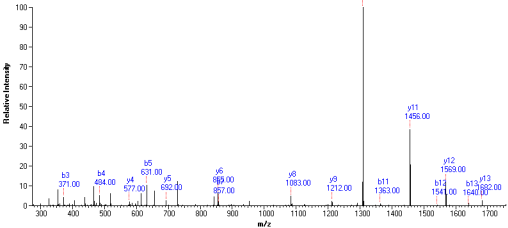

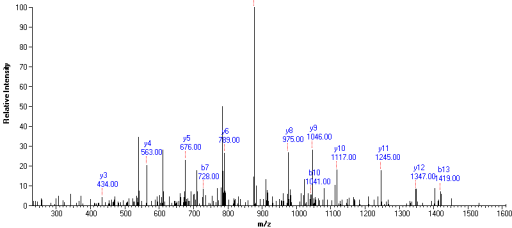

Peptide: \_EQVAYYK(ac)EDEK(ly)\_Charge: 2+\_m/z: 730.35\_MassError: 0.89720026ppm\_RetentionTime: 12.719min\_MascotScore: 42.22

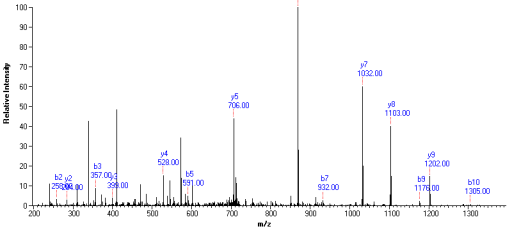



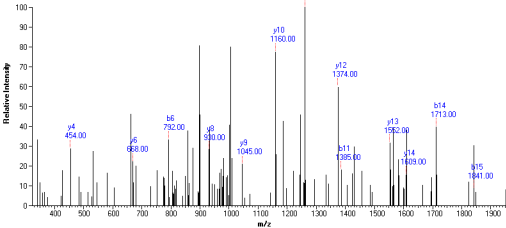

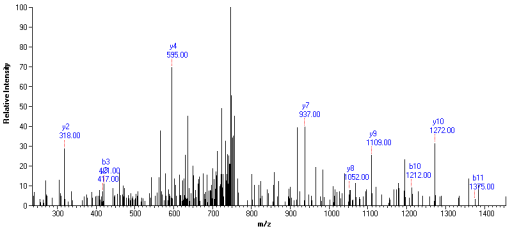

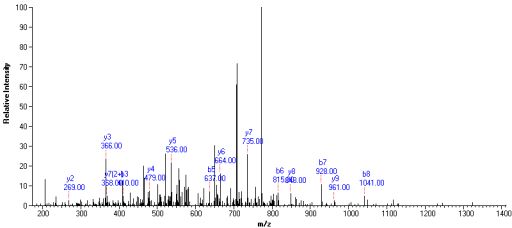

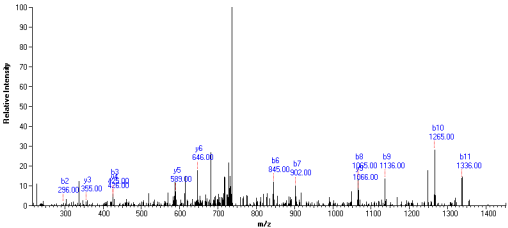

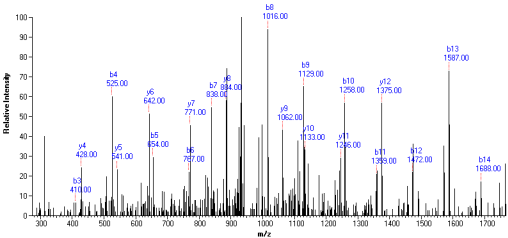

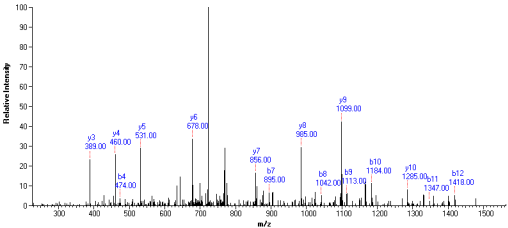

Peptide: \_ESDELIAK(ac)K(l)<sub>y</sub>\_ Charge: 2+ <sub>m/z</sub>: 545.8\_MassError: 0.72868055ppm\_RetentionTime: 17.199min\_MascotScore: 49.07

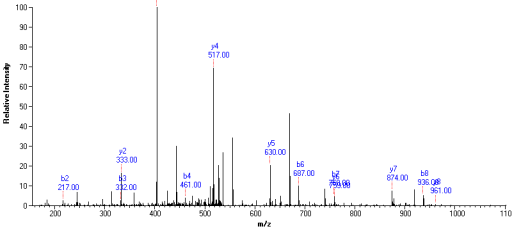

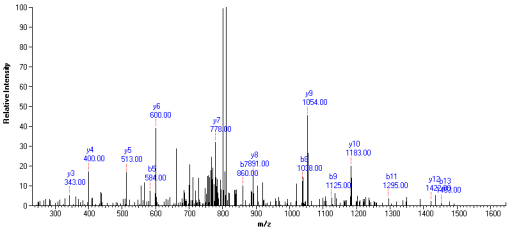



Peptide: \_ESVLPK(ac)AVTAR\_Charge: 2+\_m/z: 615.86\_MassError: 0.80678714ppm\_RetentionTime: 23.376min\_MascotScore: 49.13

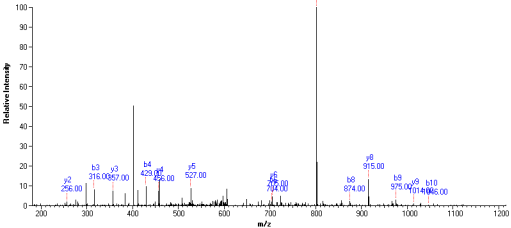

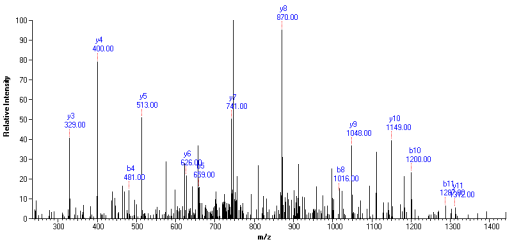

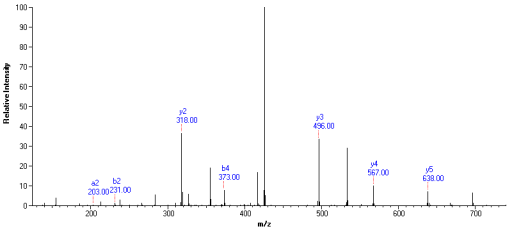

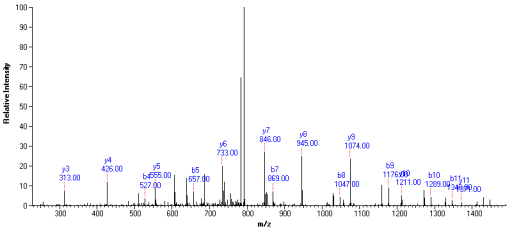

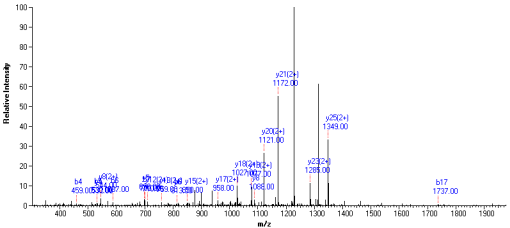

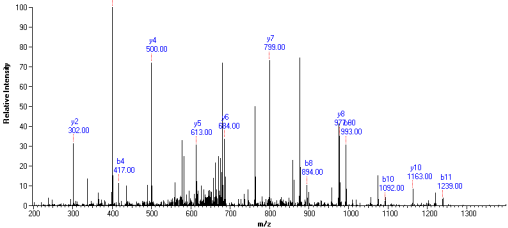

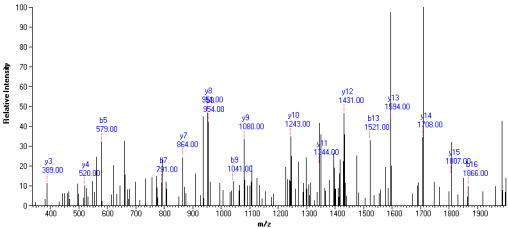

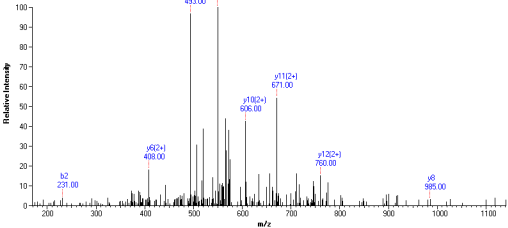



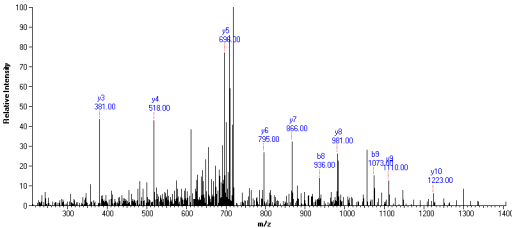

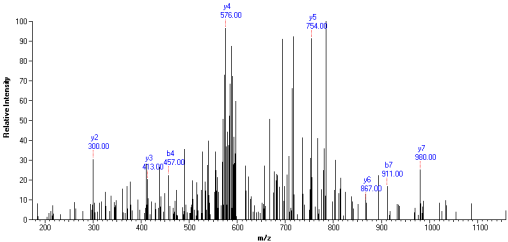

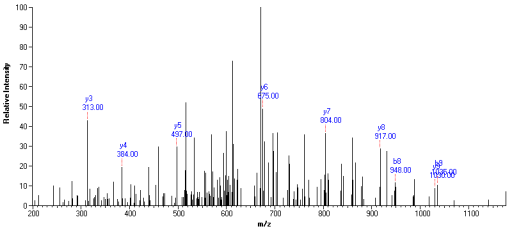

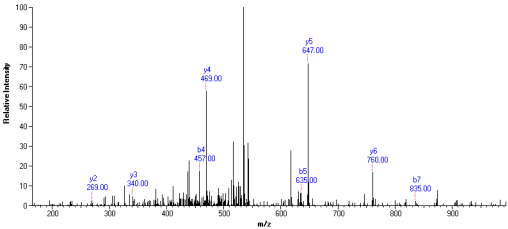

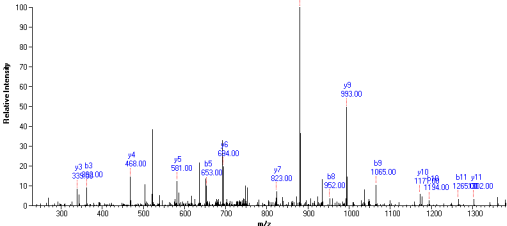

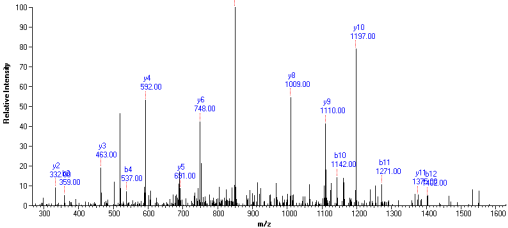

Peptide: \_ETVK(ac)YADM(ox)LAM(ox)SAK(Iy)\_Charge: 2+\_m/z: 856.4\_MassError: 3.5590167ppm\_RetentionTime: 25.874min\_MascotScore: 30.69

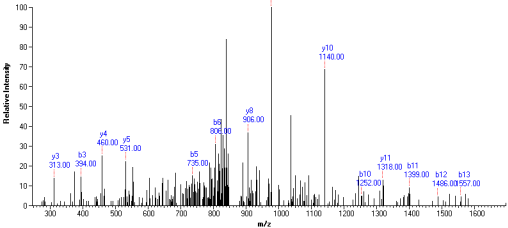

Peptide: \_EVAK(ac)IEGEISR\_Charge: 2+\_m/z: 645.86\_MassError: 1.433095ppm\_RetentionTime: 21.843min\_MascotScore: 61.87

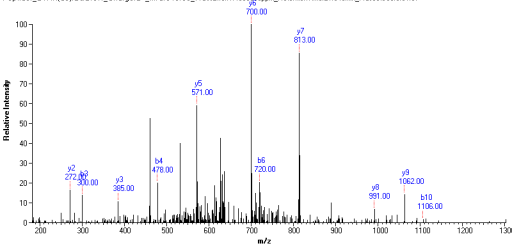



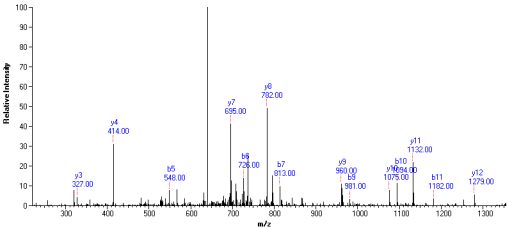

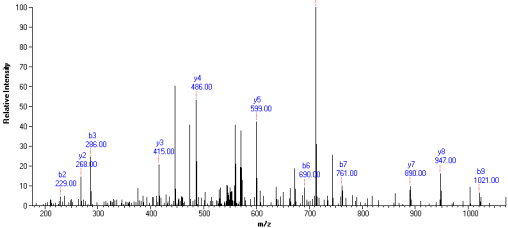

Peptide: \_EVIEFYSK(ac)NK(Iy)\_Charge: 2+\_m/z: 657.85\_MassError: 0.32804279ppm\_RetentionTime: 25.073min\_MaxcotScore: 52.52

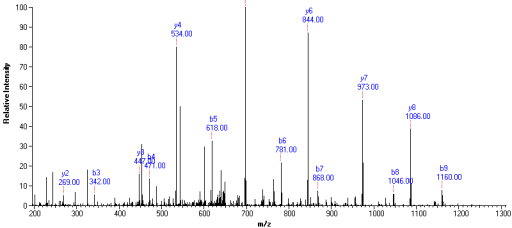

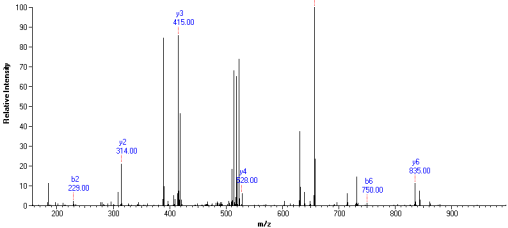

Peptide: \_EVK(ac)LCVAYR\_Charge: 2+\_m/z: 599.32\_MassError: 0.33813323ppm\_RetentionTime: 24.309min\_MascotScore: 51.75

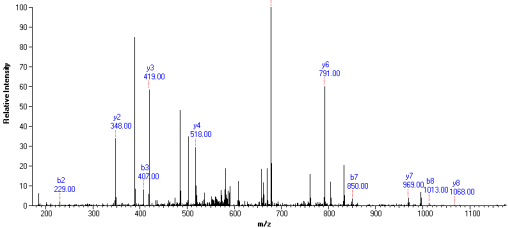

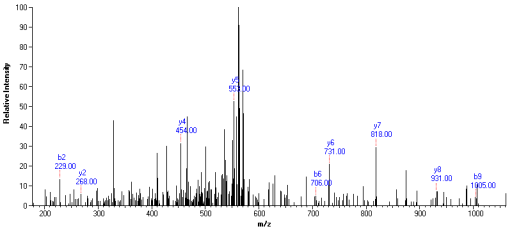

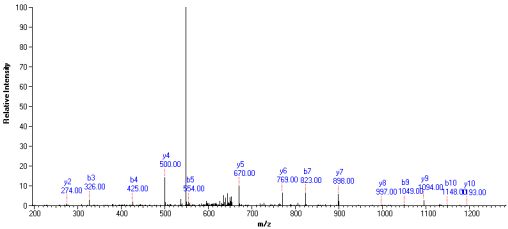

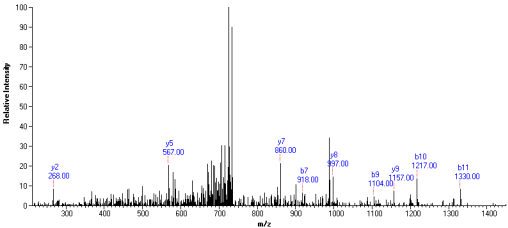



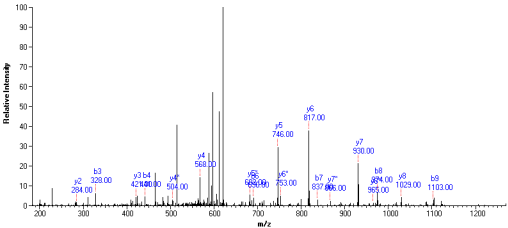

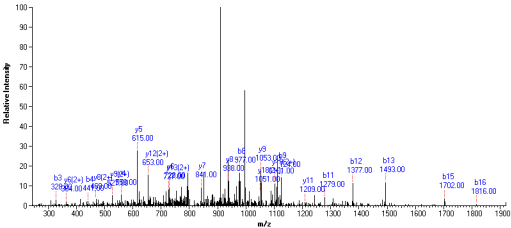

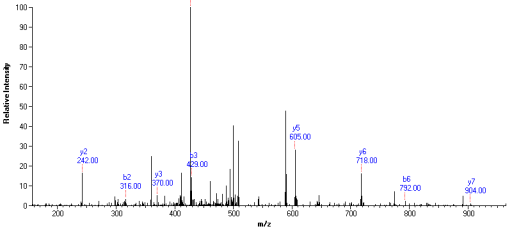

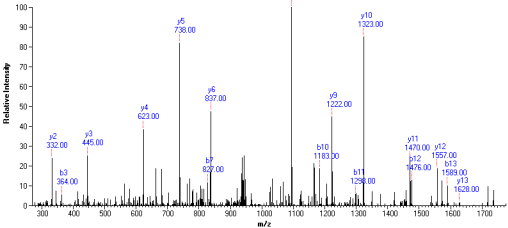

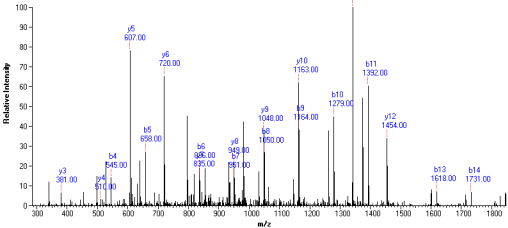

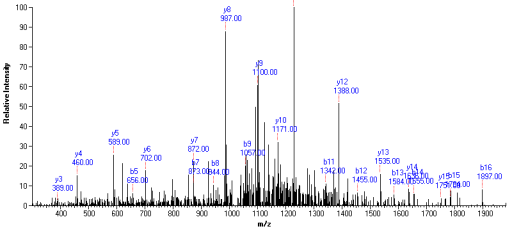

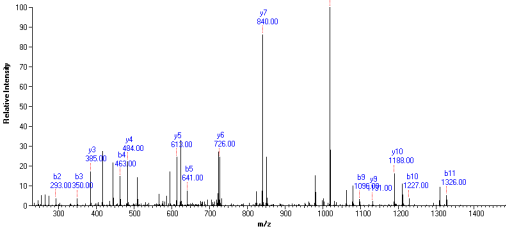

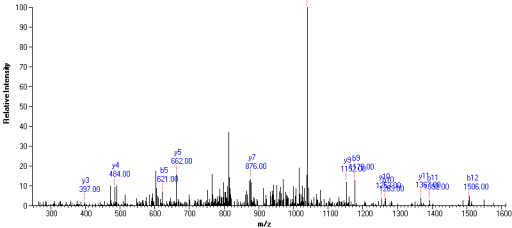



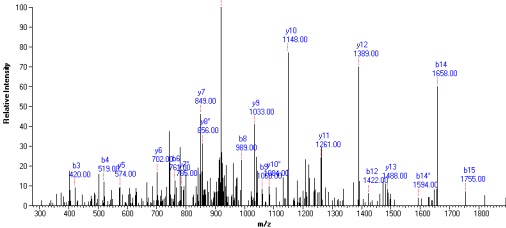

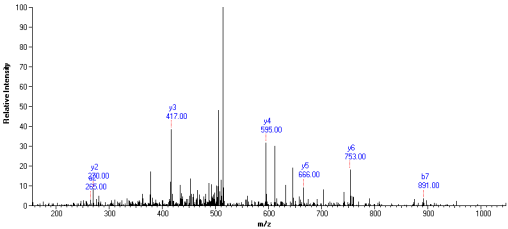

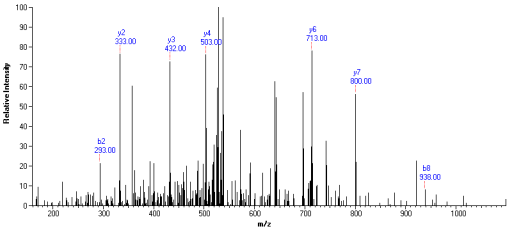

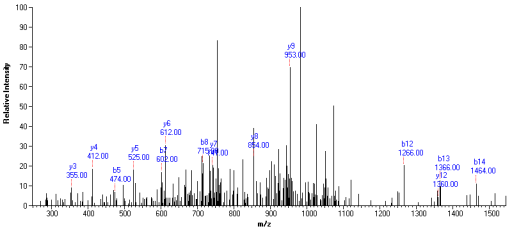

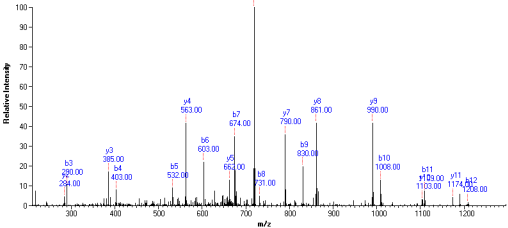

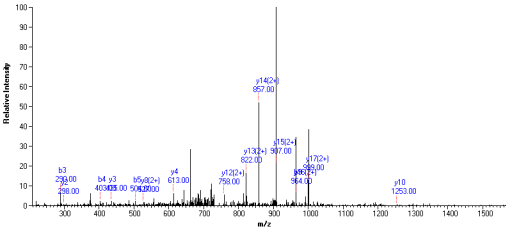

Peptide: \_FAAYAK(ac)AYPQEAAEFTR\_Charge:2+\_m/z: 997.99\_MassError:1.0043648ppm\_RetentionTime:33.803min\_MascotScore:67.46

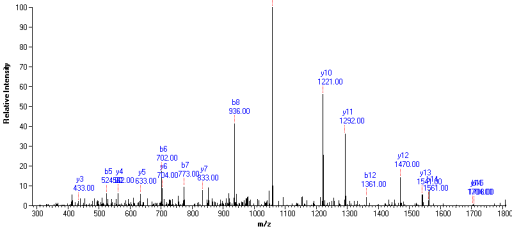

Peptide: \_FADK(ac)LPSEPR\_Charge:2+\_m/z: 610.33\_MassError:0.23912646ppm\_RetentionTime:23.653min\_MascotScore:31.72

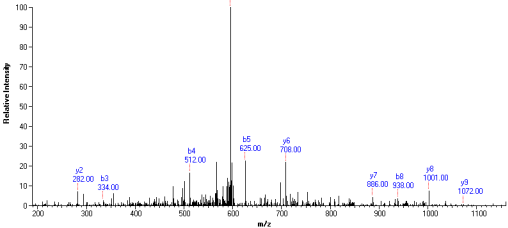



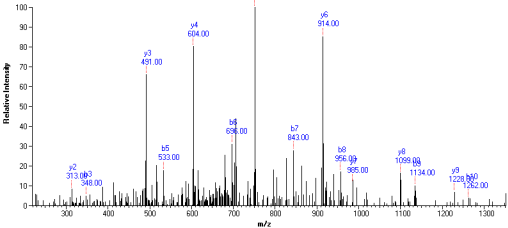

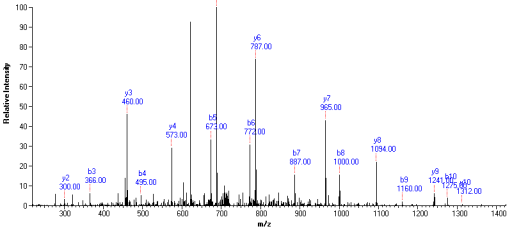

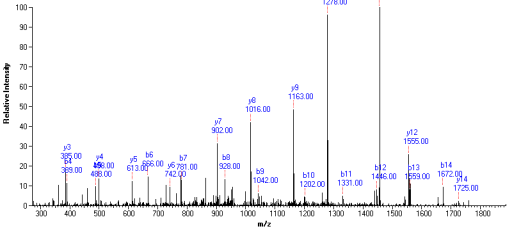

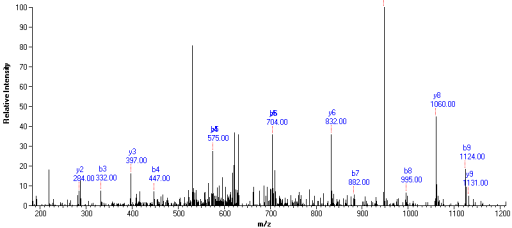

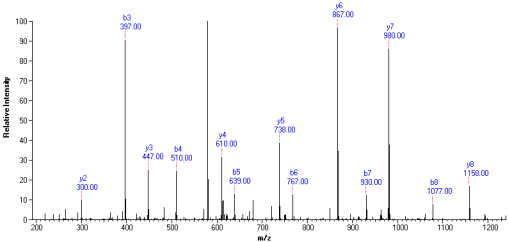

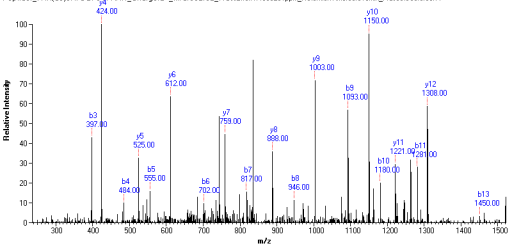

Peptide: \_FALEK(ac)FINELLPVIDSLDR\_Charge: 3+\_m/z: 765.09\_MassError: 1.5133569 ppm\_RetentionTime: 49.818min\_MascotScore: 28.51

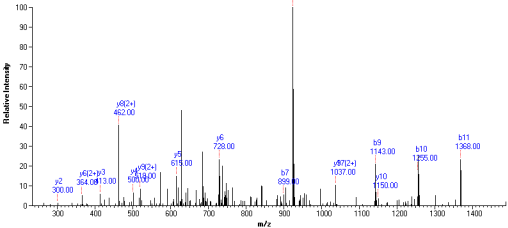

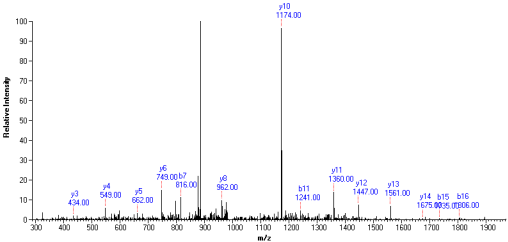



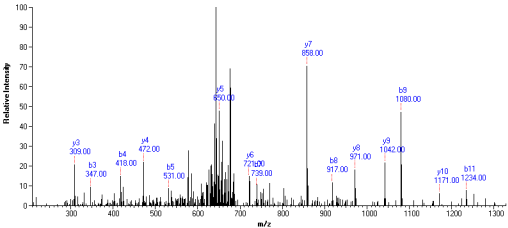

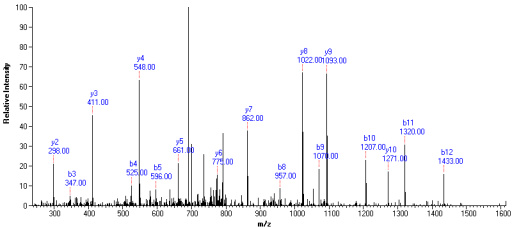

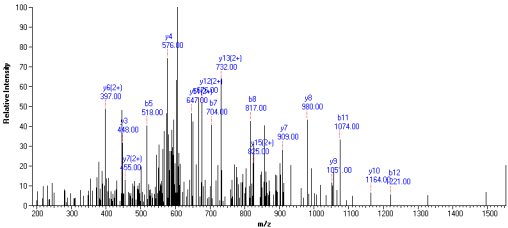

Peptide: \_FATHGGYLLQGK(ac)ELK(y)\_Charge: 2+\_m/z: 860.47\_MassError: 0.81041377ppm\_RetentionTime: 27.271min\_MascotScore: 69.91

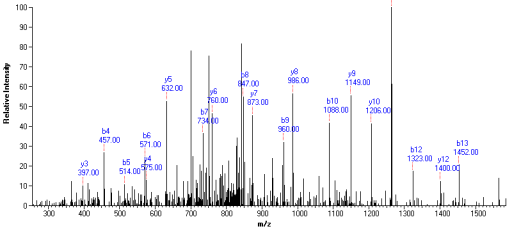

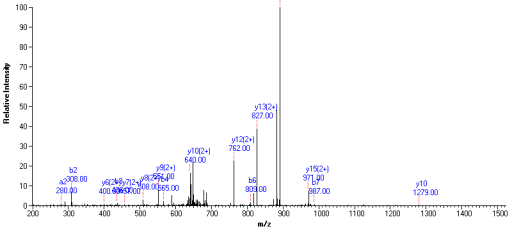

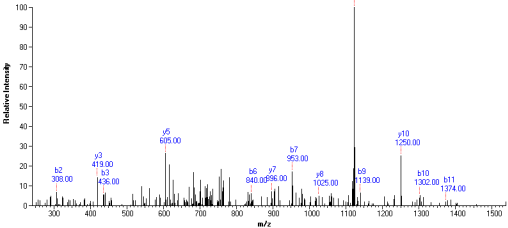

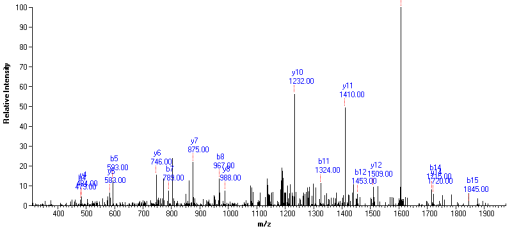

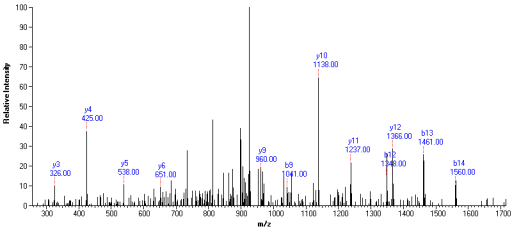



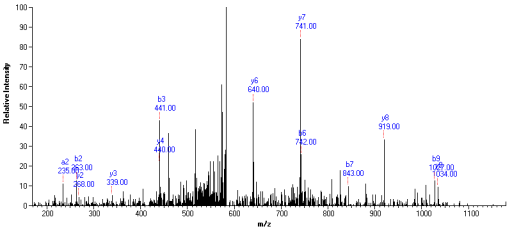

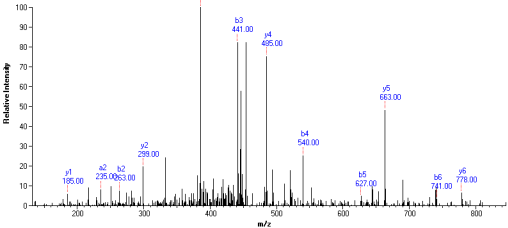

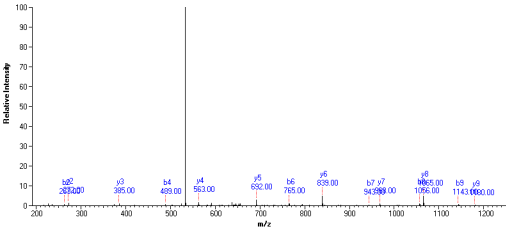

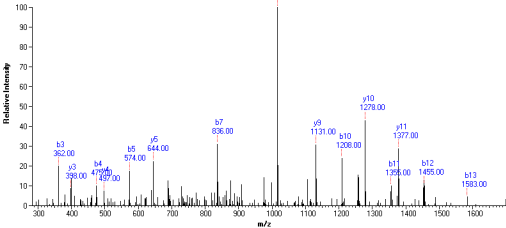

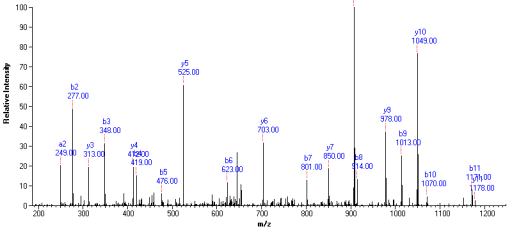

Peptide: \_FEALAEK(ac)LGVR\_Charge: 2+\_m/z: 646.87\_MassError: 0.10396911ppm\_RetentionTime: 36.853min\_MascotScore: 35.6

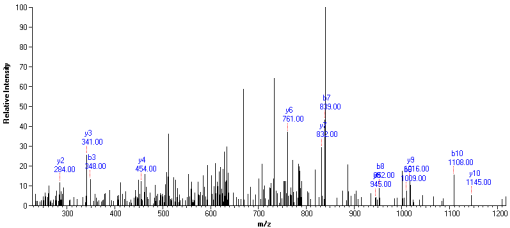

Peptide: \_FEEK(ac)FAALGK(Iy)\_Charge: 2+\_m/z: 599.33\_MassError: 1.8585693ppm\_RetentionTime: 29.84min\_MascotScore: 53.55

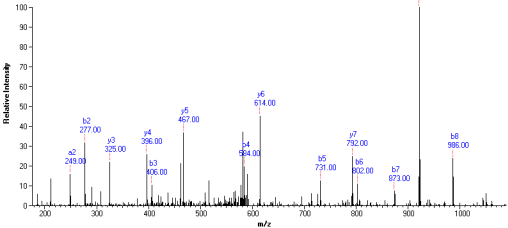

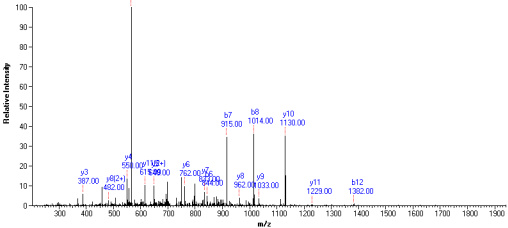



Peptide: \_FEK(ac)LDAIR\_Charge: 2+\_m/z: 526.3\_MassError: 0.17470464ppm\_RetentionTime: 20.983min\_MascotScore: 43.74

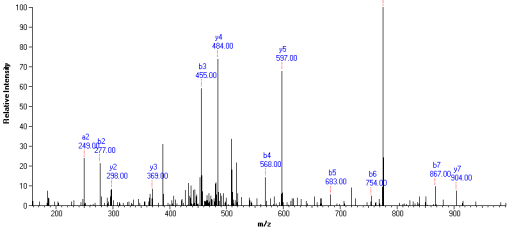

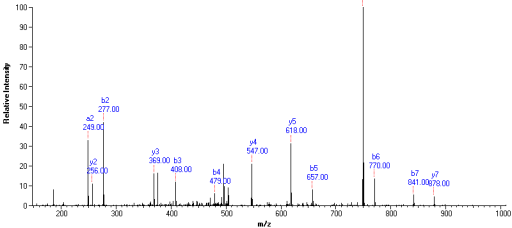

Peptide: \_FENPYLK(ac)DDVER\_Charge: 2+\_m/z: 792.89\_MassError: 0.75227876ppm\_RetentionTime: 29.313min\_MascotScore: 54.59

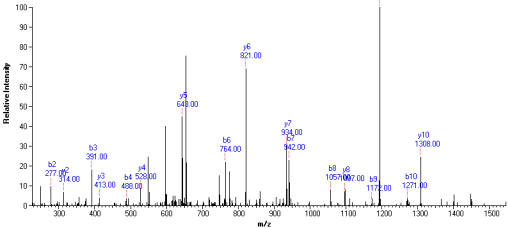

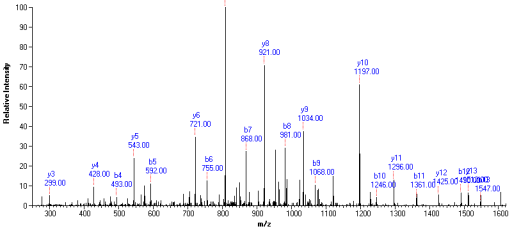

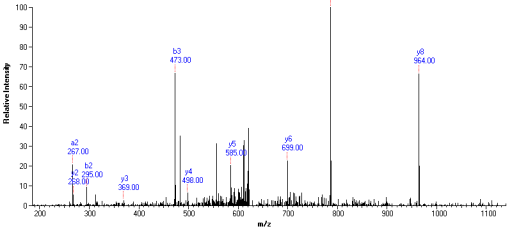

Relative Intensity

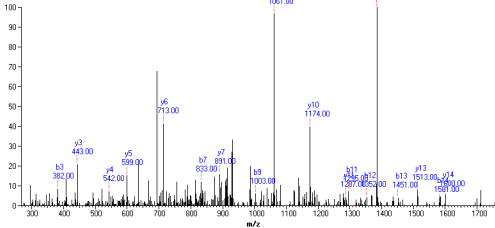

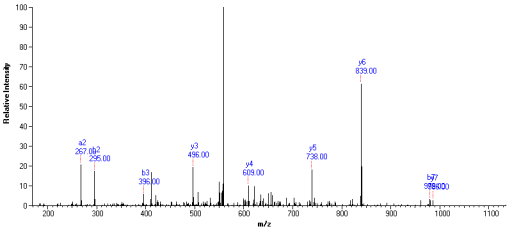

Peptide: \_FGATDCINPNDYDK(ac)PIK([ly]\_Charge:2+\_m/z:1013.98\_MassError:0.40088532ppm\_RetentionTime:30.85min\_MascotScore:40.94

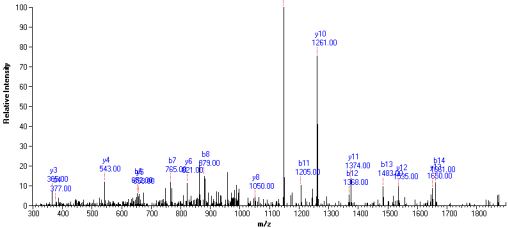



Peptide: \_FGGNEK(ac)QALELPR\_Charge: 2+\_m/z: 759.9\_MassError: -0.96375309ppm\_RetentionTime: 28.363min\_MascotScore: 55.31

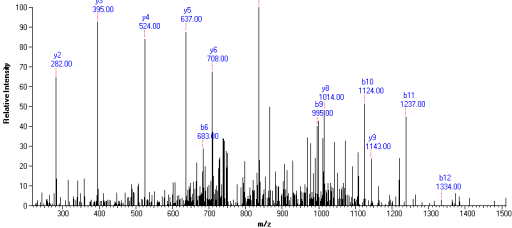

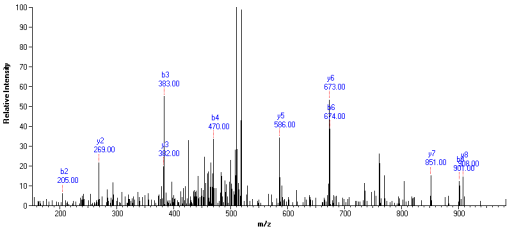

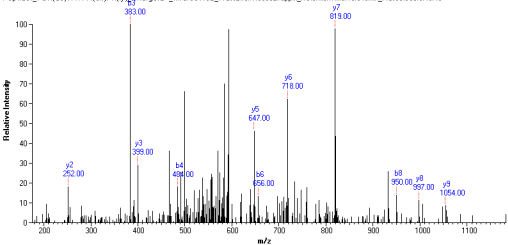

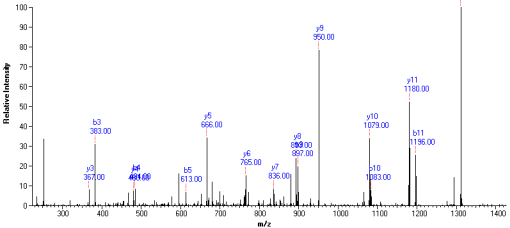

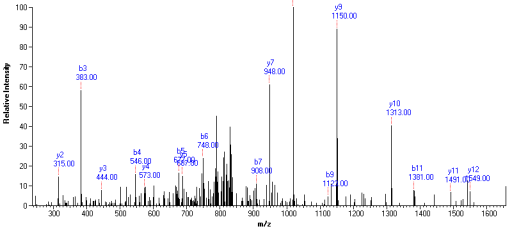

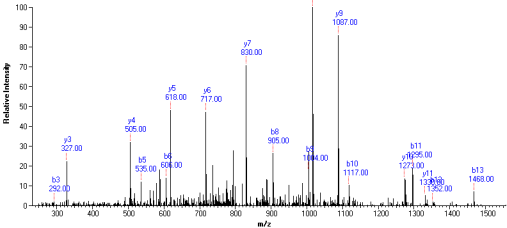

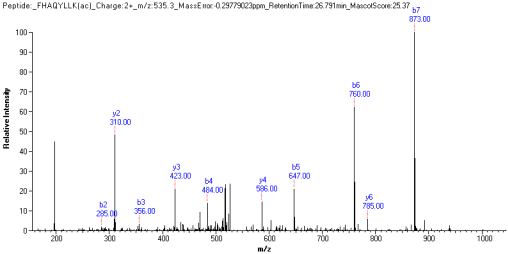

Peptide: \_FICADASK(ac)QVDILGK(y)\_Charge: 2+\_m/z: 918.5\_MassError: 0.80808842ppm\_RetentionTime: 41.344min\_MascotScore: 44.71

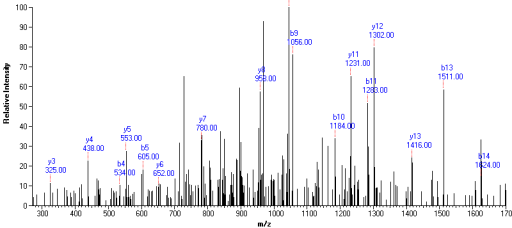



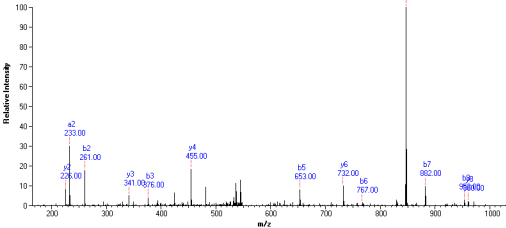

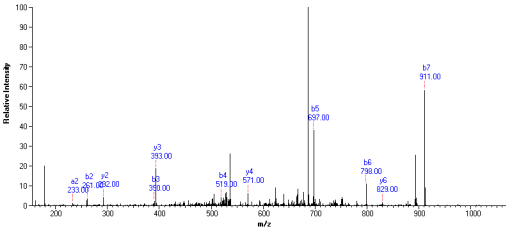

Peptide: \_FIK(ac)ILTGNIR\_Charge: 2+\_m/z: 608.88\_MassError: 1.5660104ppm\_RetentionTime: 32.346min\_MassotScore: 39.21

Relative Intensity

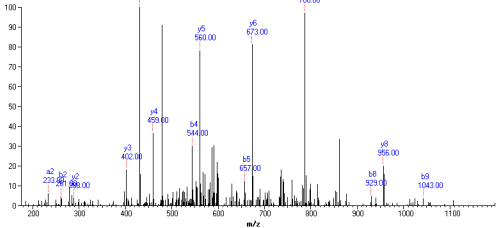

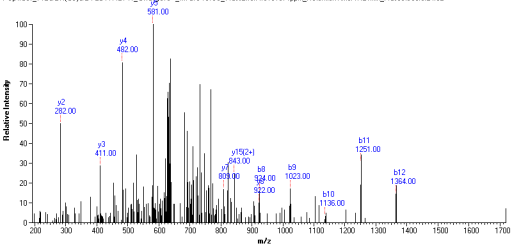

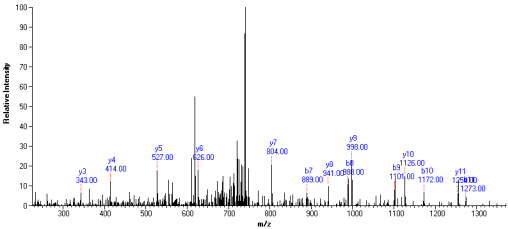

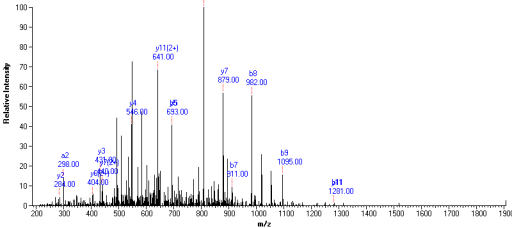

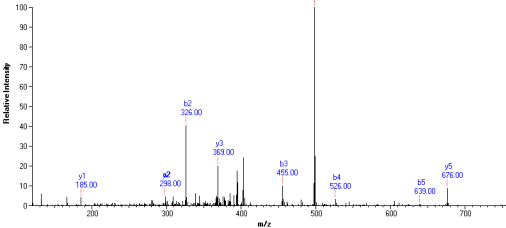

Peptide: \_FK(ac)EYWTEYFQIMK(Iy)\_Charge:2+\_m/z: 936.46\_MassError:3.532127ppm\_RetentionTime:44.483min\_MascotScore:61.6

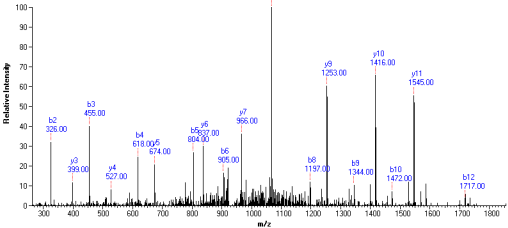



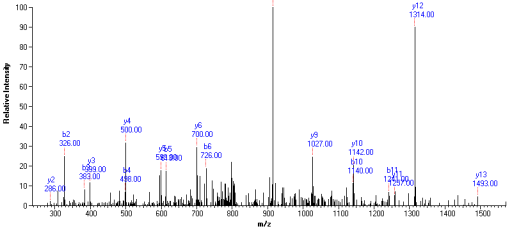

Peptide: \_FK(ac)VEER\_Charge: 2+\_m/z: 434.24\_MassError: 1.5711138ppm\_RetentionTime: 12.515min\_MascotScore: 38.01

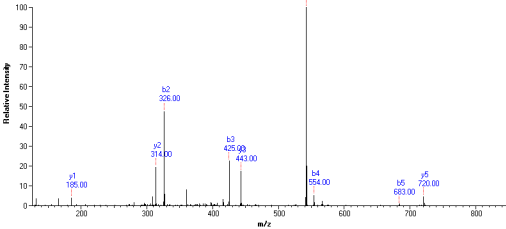

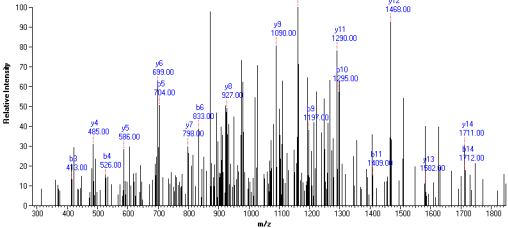

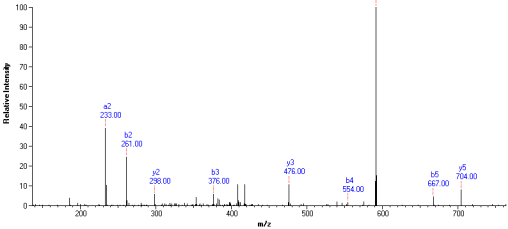

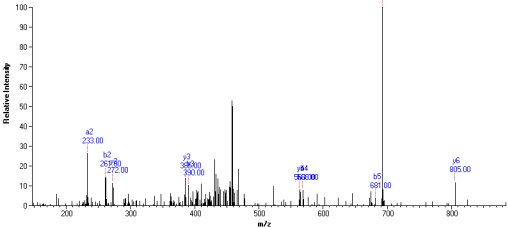

Peptide: \_FLGK(ac)GYTK(Iy)\_Charge: 2+\_m/z: 454.28\_MassError: 2.9734799ppm\_RetentionTime: 13.284min\_MascotScore: 39.82

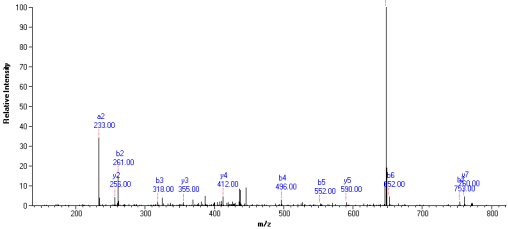

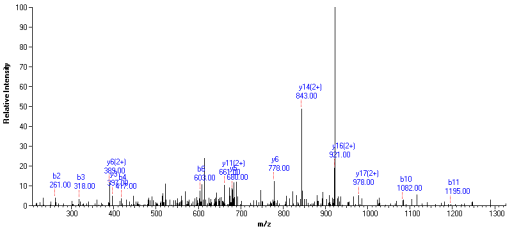

Peptide: \_FLGYK(ac)LK(Iy)\_Charge: 2+\_m/z: 463.79\_MassError: 0.49613835ppm\_RetentionTime: 26.618min\_MascotScore: 23.26

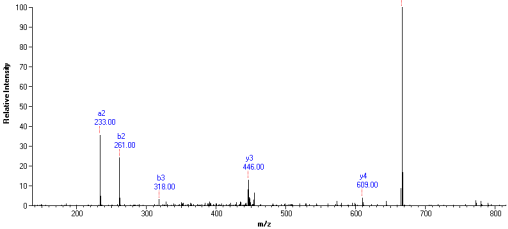



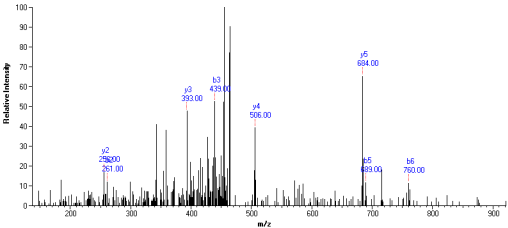

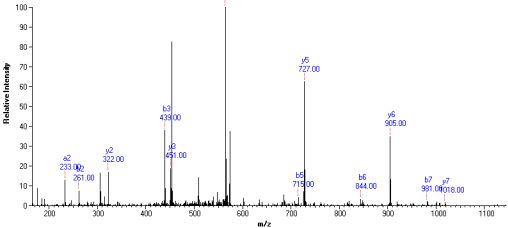

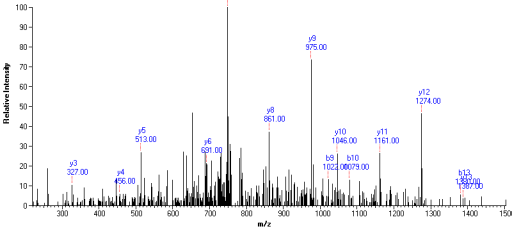

Peptide: \_FLLVEGVHQK(ac)ALESLR\_Charge:2+\_m/z:950.55\_MassError:0.41946563ppm\_RetentionTime:37.786min\_MascotScore:75.14

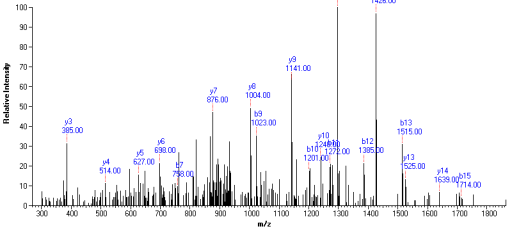

Peptide: \_FM( $\alpha$ )AQYQELK(ac)K(Iy)\_Charge: 2+\_m/z: 680.35\_MassError: 1.5643017ppm\_RetentionTime: 22.485min\_MascotScore: 45.94

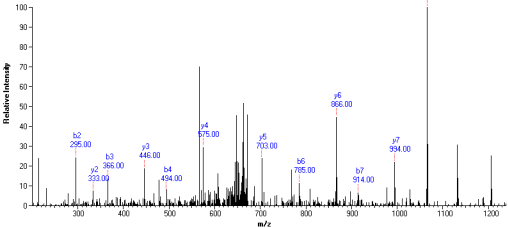

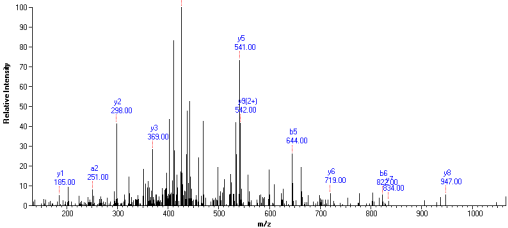

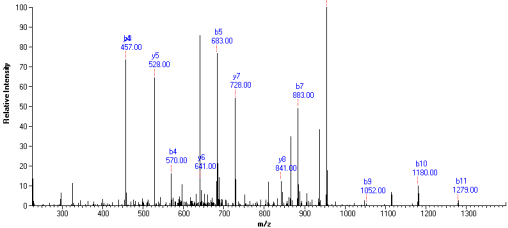

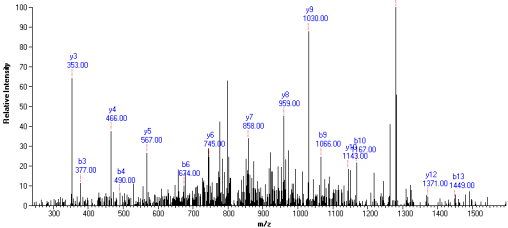



Peptide: \_FNFEK(ac)FAGANDR\_Charge: 2+\_m/z: 738.36\_MassError: 0.71286848ppm\_RetentionTime: 34.262min\_MascotScore: 80.49

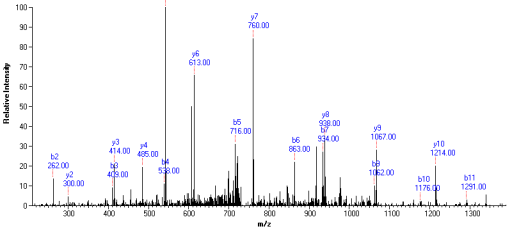

Peptide: \_FNIDADK(ac)VNPR\_Charge: 2+\_m/z: 665.84\_MassError: 0.40079465ppm\_RetentionTime: 21.202min\_MascotScore: 75.71

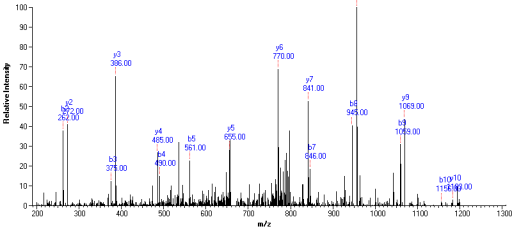

Peptide: \_FNK(ac)GEK(Iy)\_Charge: 2+\_m/z: 390.72\_MassError: 2.3032175ppm\_RetentionTime: 5.2399min\_MascotScore: 34.03

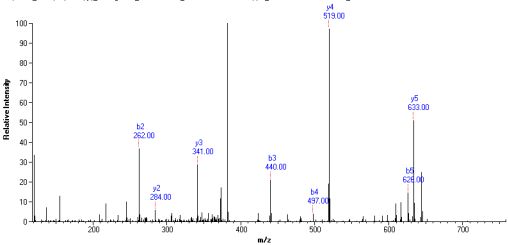

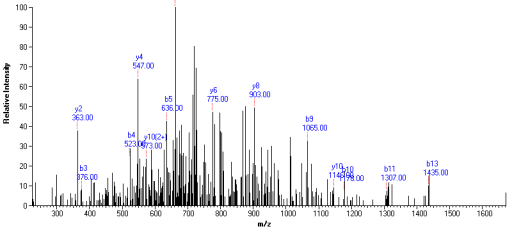

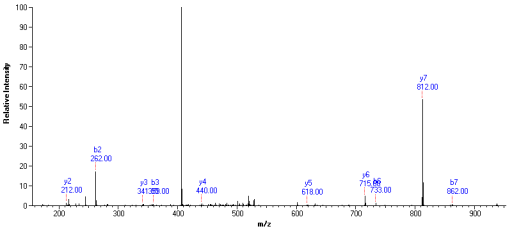

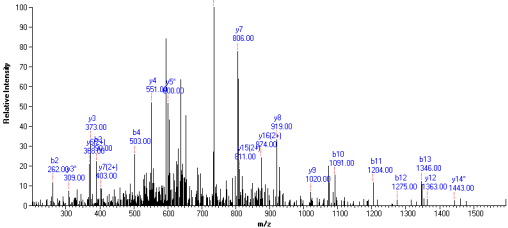

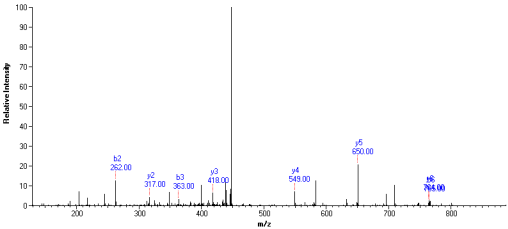

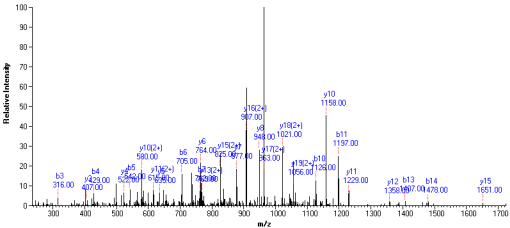



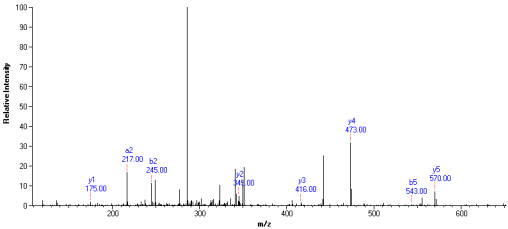

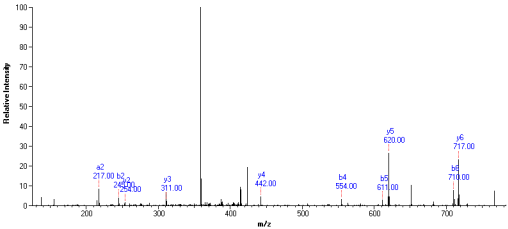

Peptide: FQDEVG GK(ac)LR\_Charge: 2+\_m/z: 604.82\_MassEng: 1.3600465ppm\_RetentionTime: 20.43min\_MascotScore: 46.29

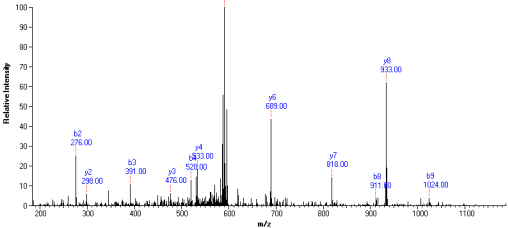

Peptide: FQEVFILK(ac)GR\_Charge: 2+\_m/z: 648.88\_MassError: 1.3670181ppm\_RetentionTime: 34.644min\_MascotScore: 53.81

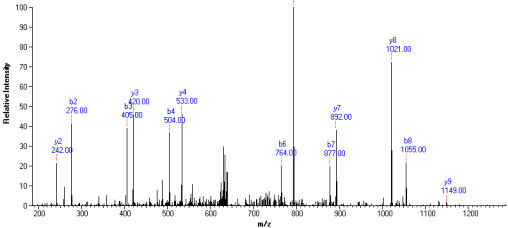

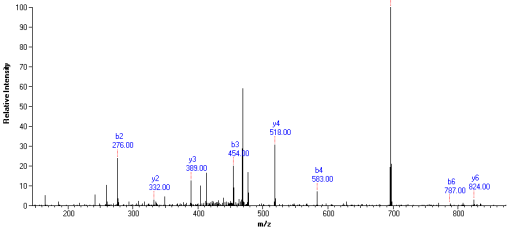

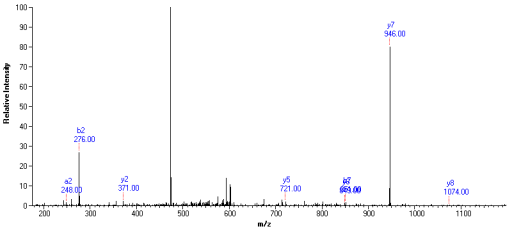

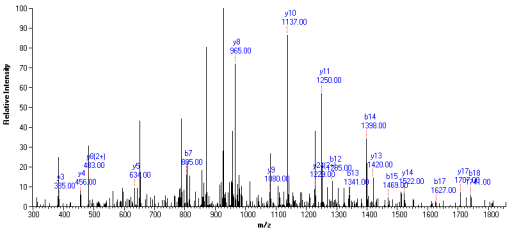

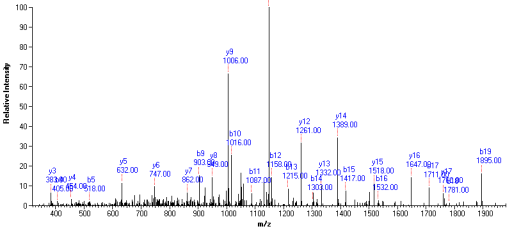



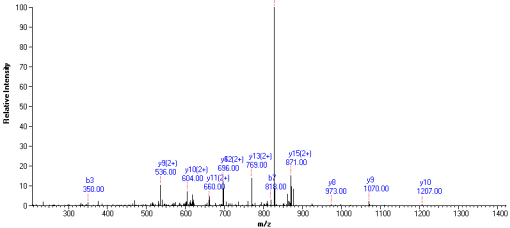

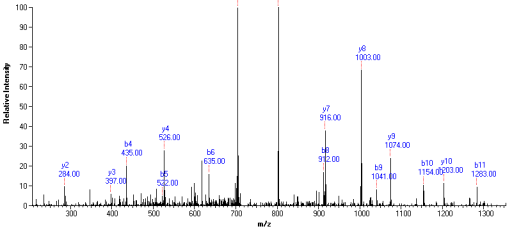

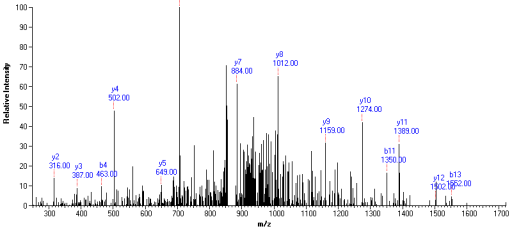

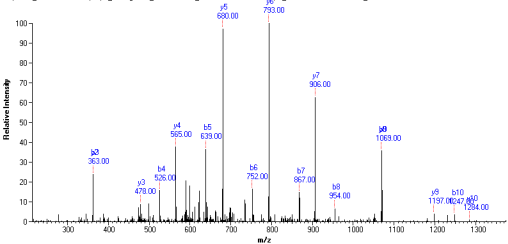

Relative Intensity

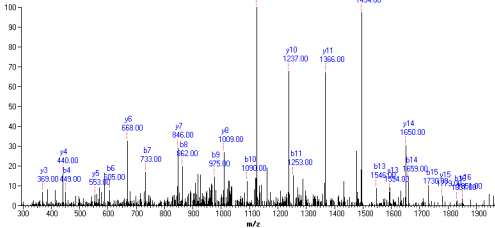

Peptide: \_FTEGAFK(ac)DWGYQLAR\_Charge: 2+\_m/z: 924.96\_MassError: 1.5665889ppm\_RetentionTime: 42.937min\_MascotScore: 80.29

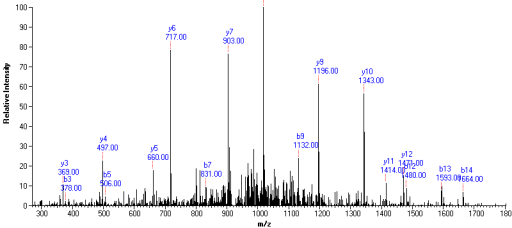

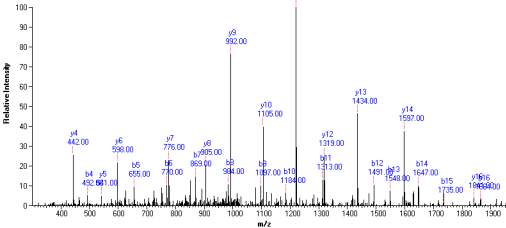

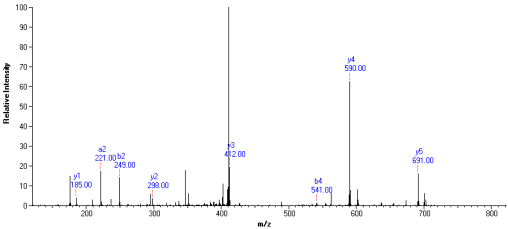



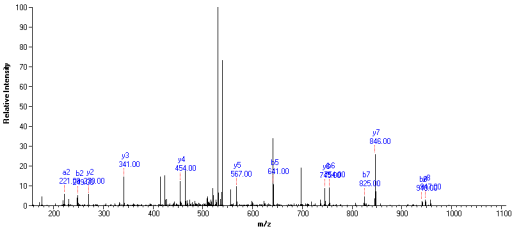

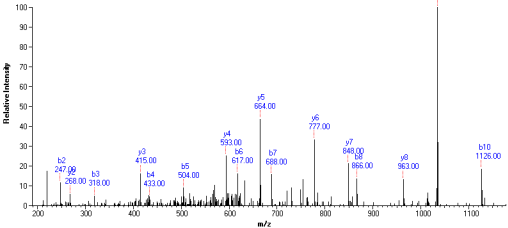

Peptide: \_FVDHLQK(ac)IDQQYDVFSIR\_Charge: 3+\_m/z: 809.74\_MassError: 0.40317828ppm\_RetentionTime: 40.871min\_MascotScore: 65.24

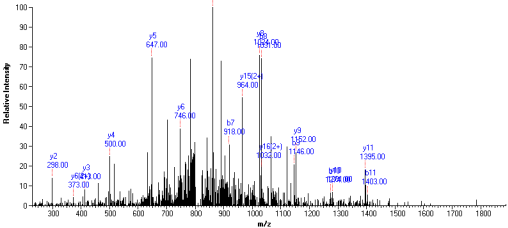

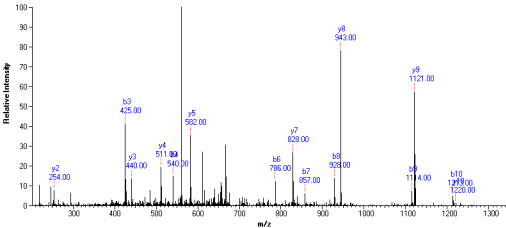

Peptide: \_FVK(ac)HPIYGK(Iy)\_Charge: 2+\_m/z: 573.84\_MassError: 1.9495856ppm\_RetentionTime: 10.44min\_MascotScore: 48.48

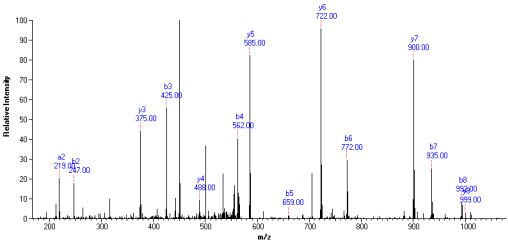

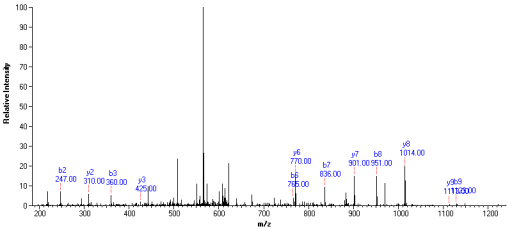

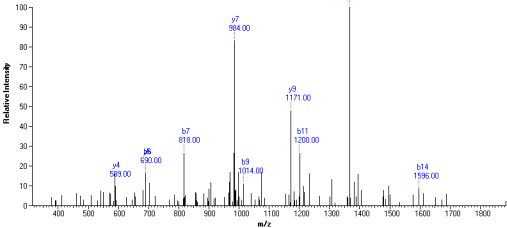

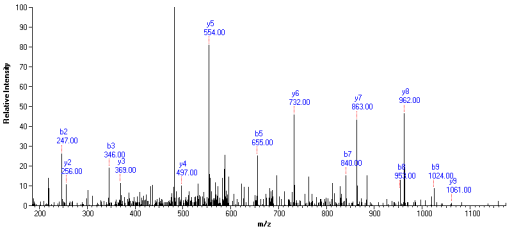



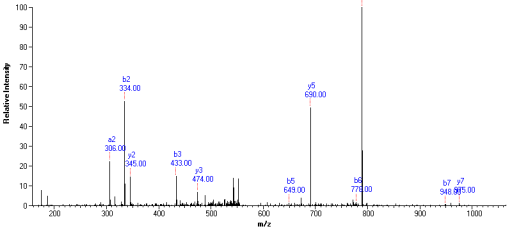

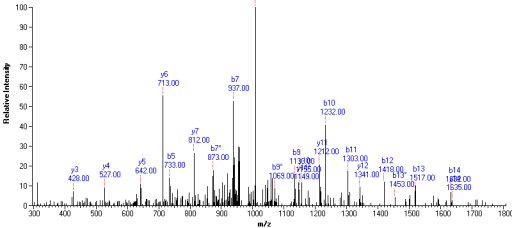

Peptide: **FYINDK(ac)QGK(ly)**\_Charge: 2+\_m/z: 585.81\_MassError: 1.7742705ppm\_RetentionTime: 19.003min\_MascotScore: 31.82

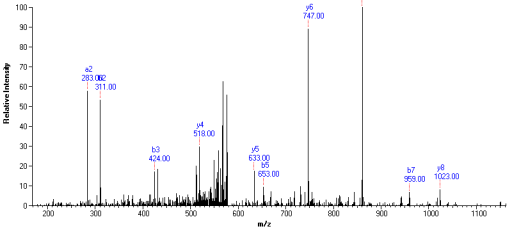

Peptide: \_GAANFYQK[ac]K[ly]\_Charge: 2+\_m/z: 542.79\_MassError: 1.3424467ppm\_RetentionTime: 11.789min\_MascotScore: 51.62

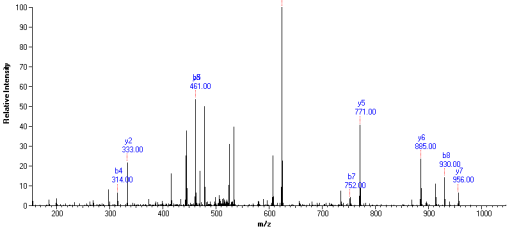

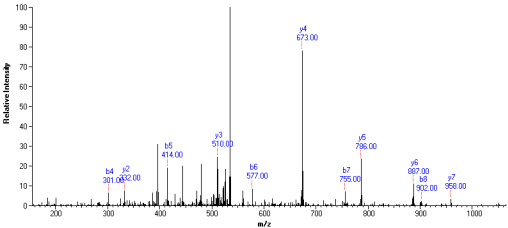

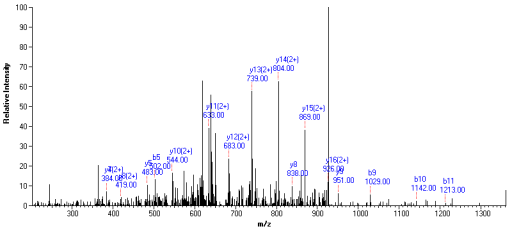

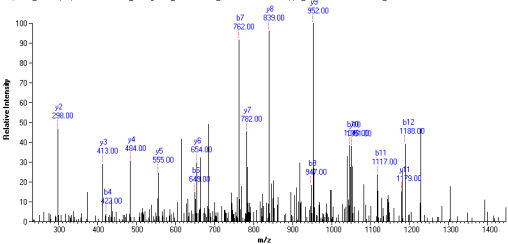

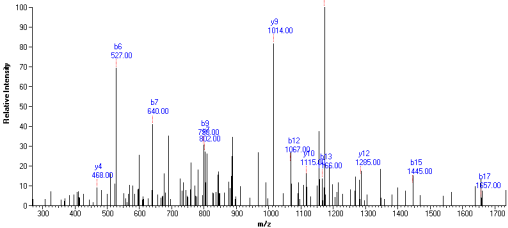



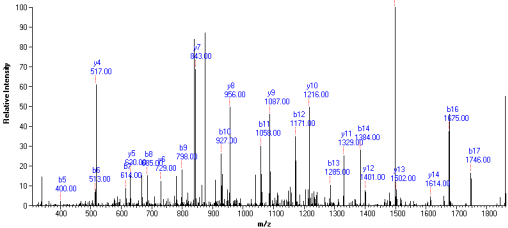

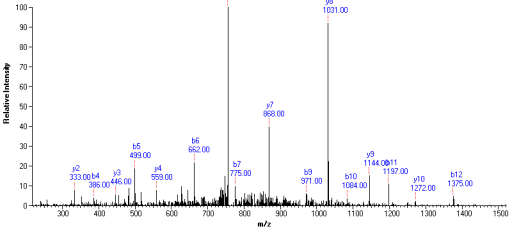

Peptide: \_GAIIDK(ac)QR\_Charge: 2+\_m/z: 480.78\_MassError: 1.8230584ppm\_RetentionTime: 14.856min\_MascotScore: 33.71

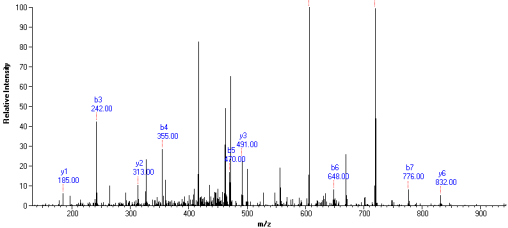

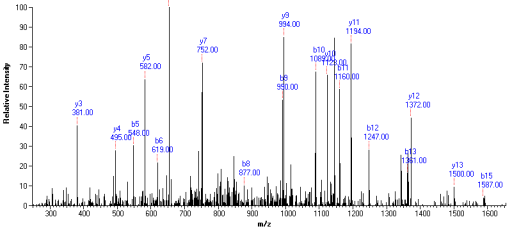

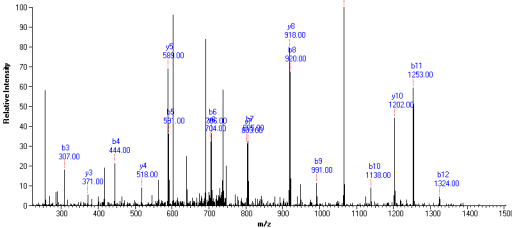

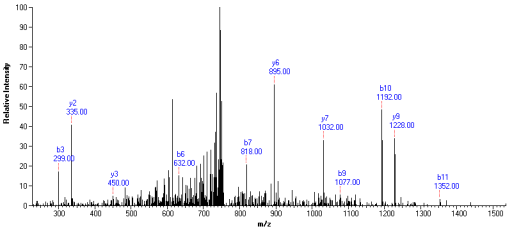

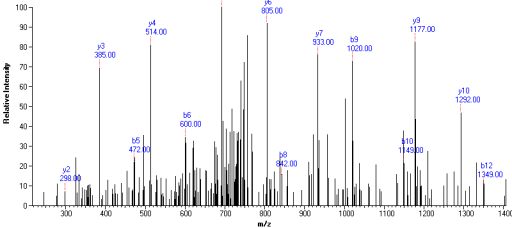

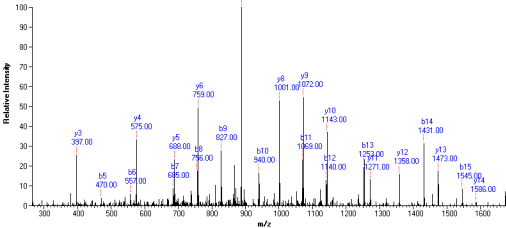



Peptide: \_GALK(ac)SILSELVR\_Charge: 2+\_m/z: 673.41\_MassError: 2.2888516ppm\_RetentionTime: 50.443min\_MascotScore: 71.35

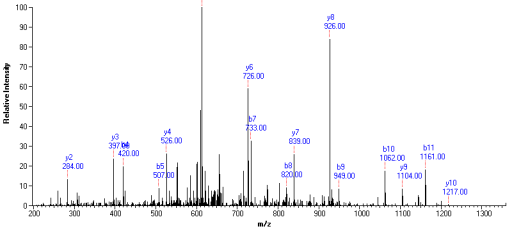

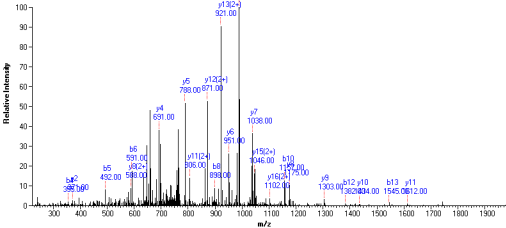

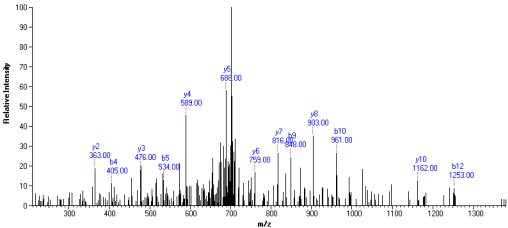

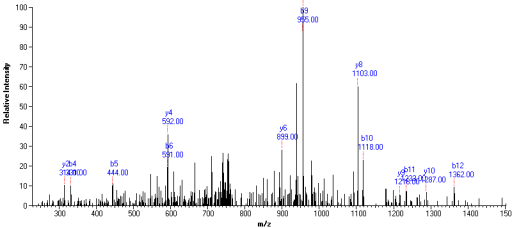

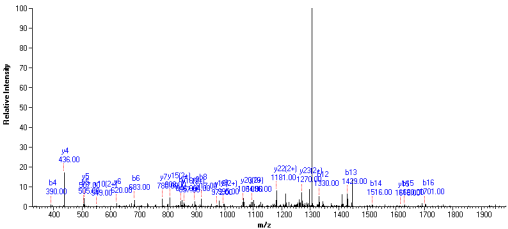

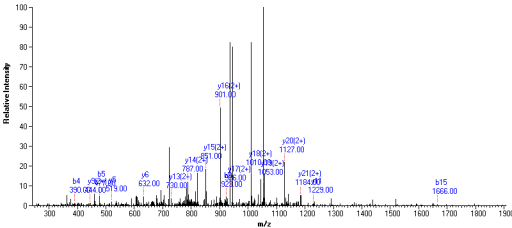

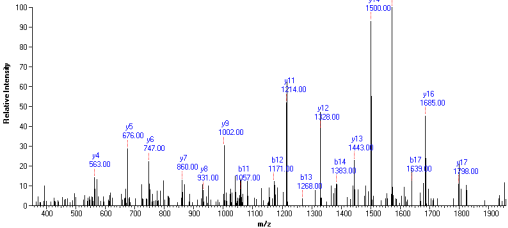

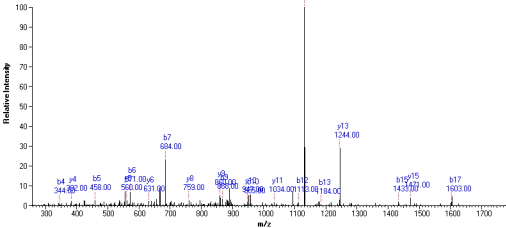



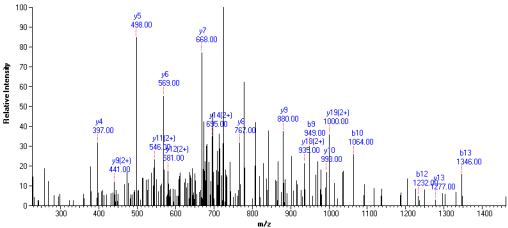

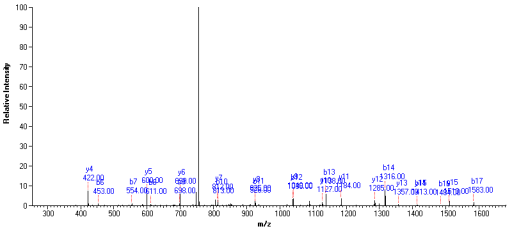

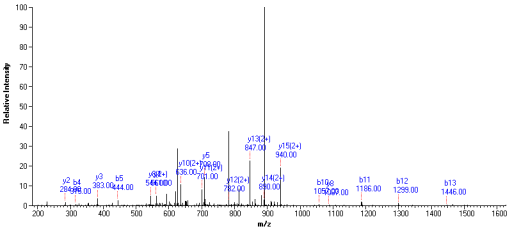

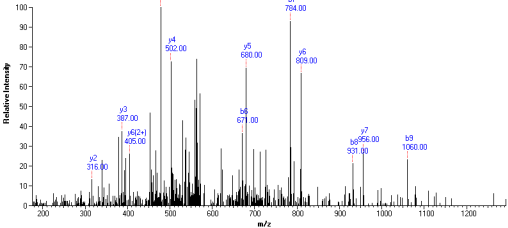

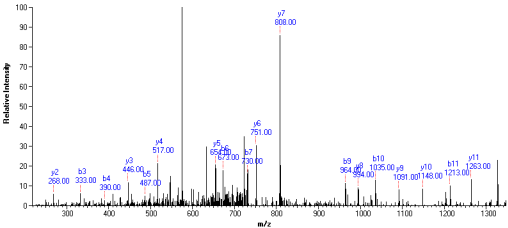

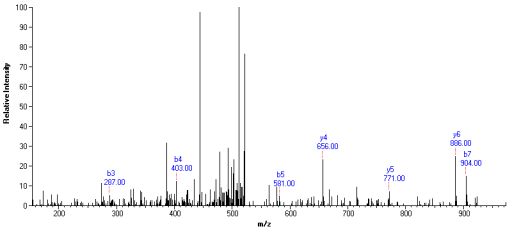

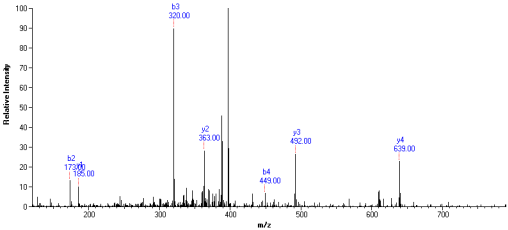

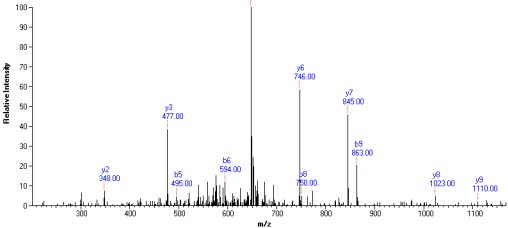



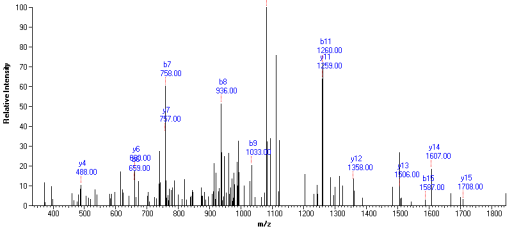

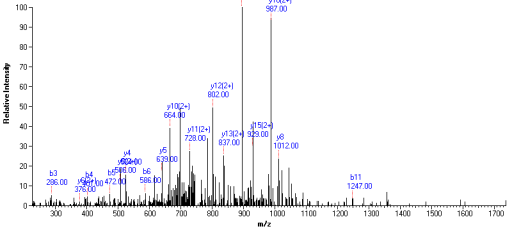

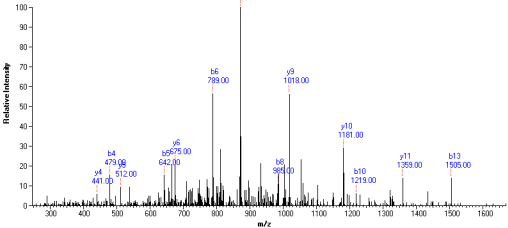

Peptide: \_GDSNNLADK(ac)YR\_Charge: 2+\_m/z: 624.82\_MassError: -1.0014581ppm\_RetentionTime: 13.797min\_MascotScore: 41.99

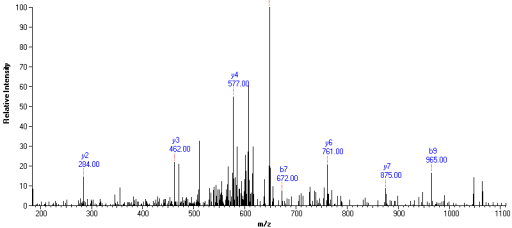

Peptide: \_GDTK(ac)VINYLK\_Charge: 2+\_m/z: 653.86\_MassError: 2.1297548ppm\_RetentionTime: 22.042min\_MascotScore: 26.9

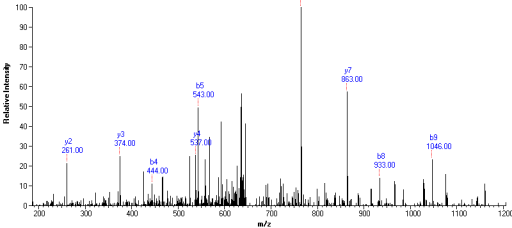

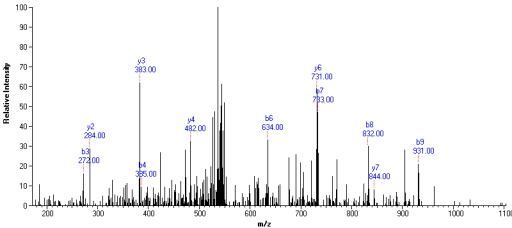

Peptide: \_GDYGGYK(ac)DDSGVHHLNVLDFQR\_Charge:3+\_m/z: 851.4\_MassError:1.2104049ppm\_RetentionTime:31.321min\_MascotScore:44.48

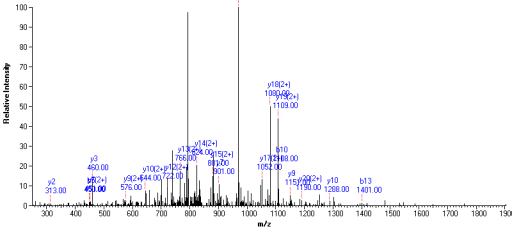

Peptide: \_GEAFSYIYSK(ac)DCNR\_Charge:2+\_m/z: 885.4\_MassError:1.5258936ppm\_RetentionTime:25.221min\_MascotScore:78.07

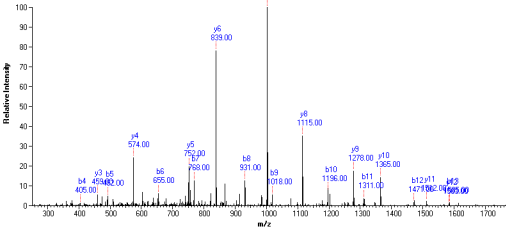



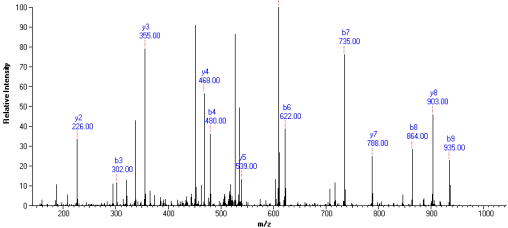

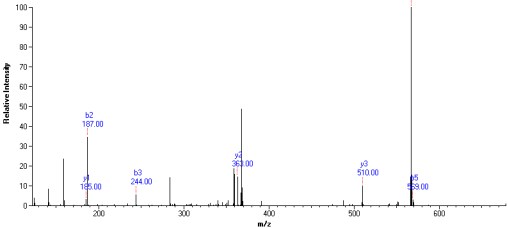

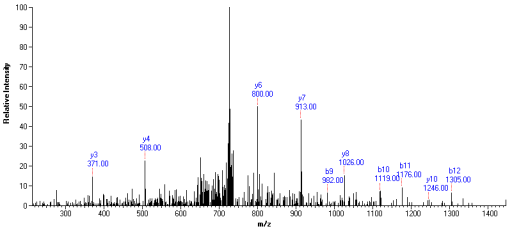

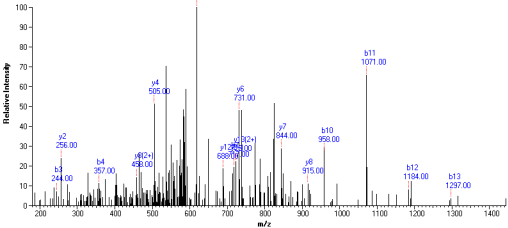

Peptide: \_GEK(ac)FDVIVM(ox)DPPK(y)\_Charge:2+\_m/z:774.9\_MassError:1.3034231ppm\_RetentionTime:30.705min\_MascotScore:28.78

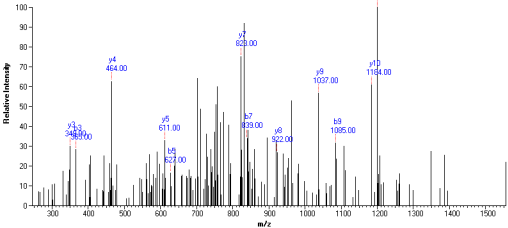

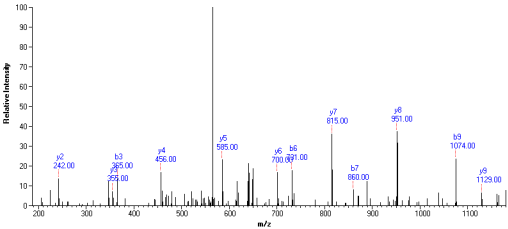

Peptide: \_GEK(ac)VLNVK(l)<sub>y</sub>\_ Charge: 2+ <sub>m/z</sub>: 472.79 <sub>MassError</sub>: 0.54820173ppm <sub>RetentionTime</sub>: 15.706min <sub>MascotScore</sub>: 48.49

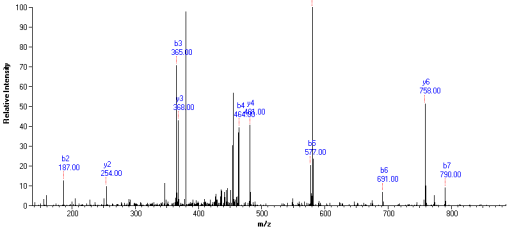

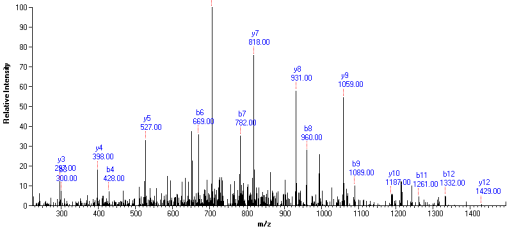



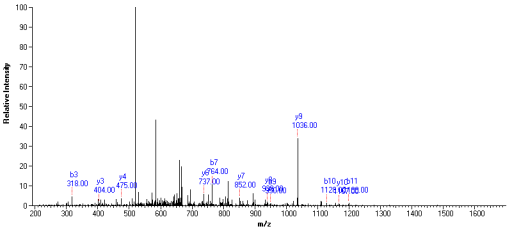

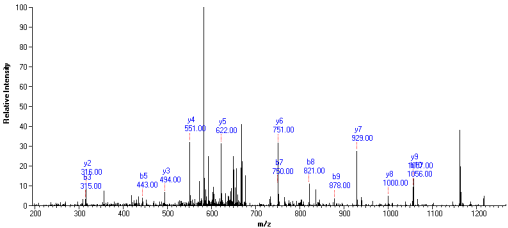

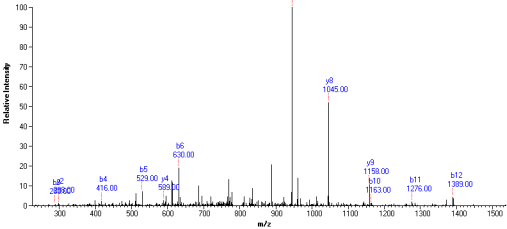

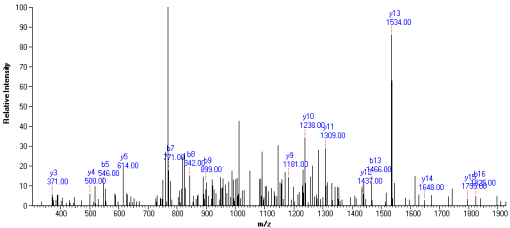

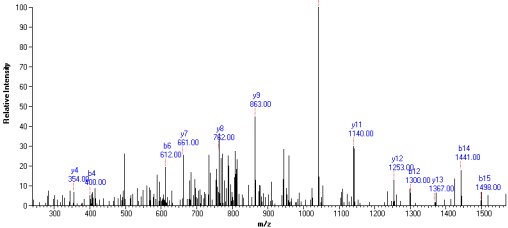

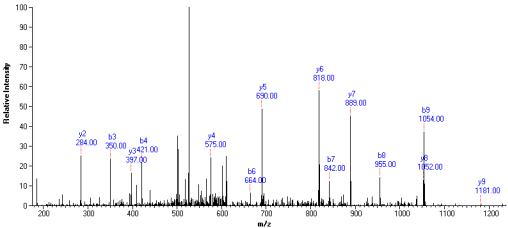

Peptide: \_GFGEQFK(ac)LGIPLGK(Iy)\_Charge: 2+\_m/z: 774.94\_MassError: 0.50664357ppm\_RetentionTime: 37.789min\_MascotScore: 27.47

Relative Intensity

100  
90  
80  
70  
60  
50  
40  
30  
20  
10  
0

m/z

y4  
422.00

y5  
535.00

y6  
592.00

b6  
686.00

y7  
705.00

b7  
844.00

y8  
883.00

b8  
957.00

b10  
1127.00

b11  
1224.00

b12  
1337.00

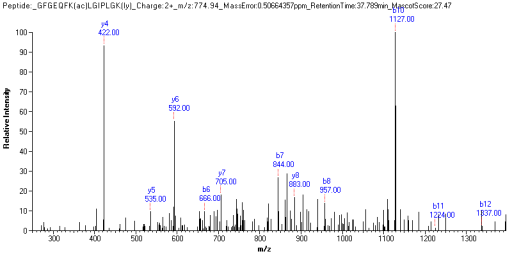

Peptide: \_GFK(ac)EAEAK(Iy)\_Charge: 2+\_m/z: 469.25\_MassError: -0.95896796ppm\_RetentionTime: 12.185min\_MascotScore: 47.51

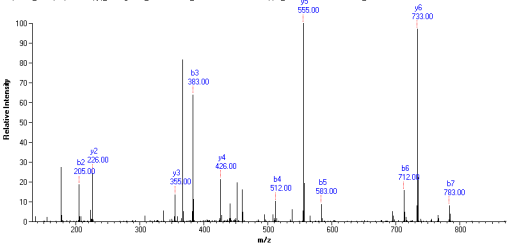



Peptide: \_GFK(ac)LDYDK(Iy)\_Charge: 2+\_m/z: 490.28\_MassError: 0.76823432ppm\_RetentionTime: 18.57min\_MascotScore: 39.42

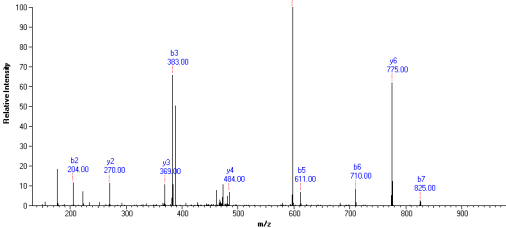

Peptide: \_GFNIK(ac)M(ox)EDGDLDVLR\_Charge: 2+\_m/z: 899.44\_MassError: -2213.2451ppm\_RetentionTime: 38.774min\_MascotScore: 77.95

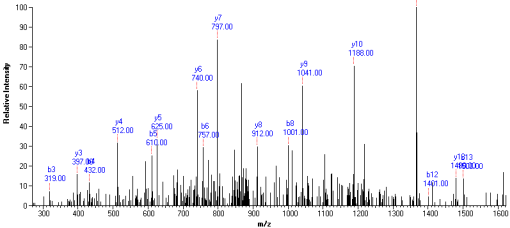

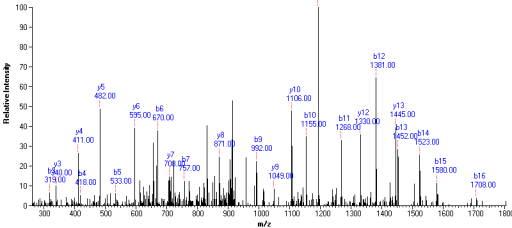

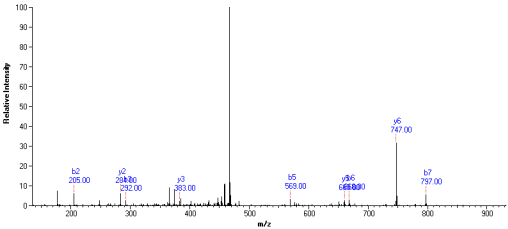

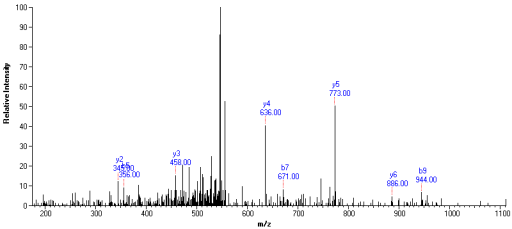

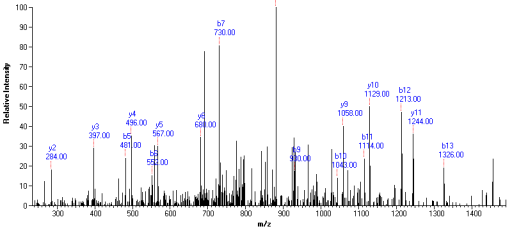

Peptide: \_GGEFK[ac]DTGHVAITQLHGK(Iy)\_Charge: 3+ m/z: 727.39\_MassError:0.50784489ppm\_RetentionTime:21.21min\_MascotScore:35.34

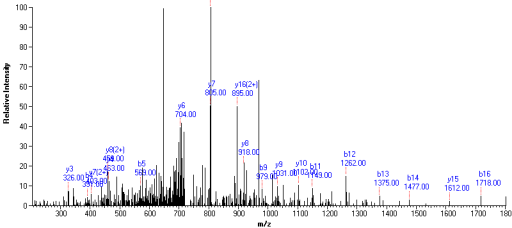

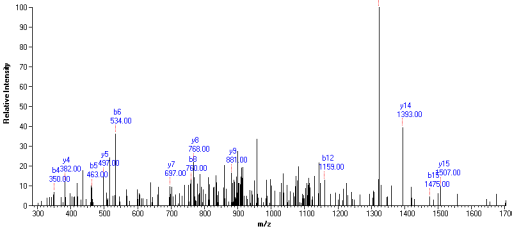



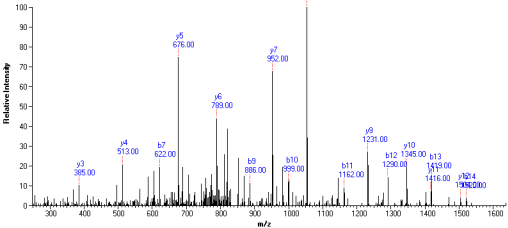

Peptide: \_GGIYLYPSTASHPDGK(jac)LR\_Charge: 2+\_m/z: 996.52\_MassError: 2.5632379ppm\_RetentionTime: 22.27min\_MascotScore: 57.9

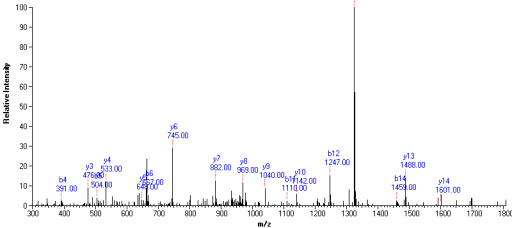

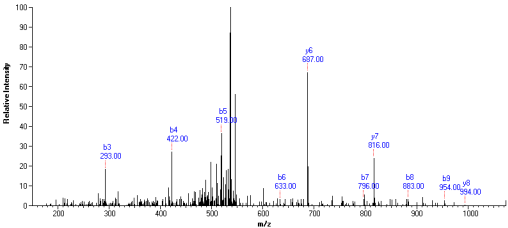

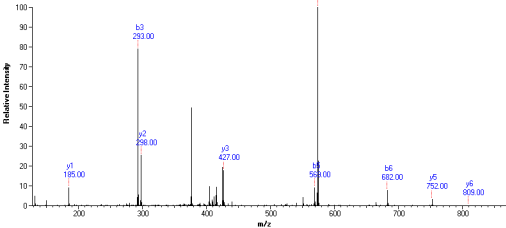

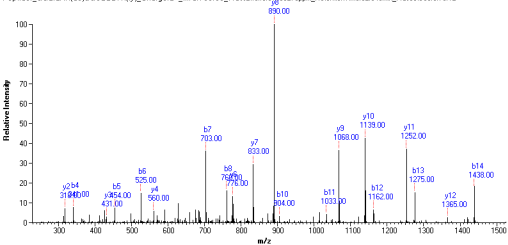

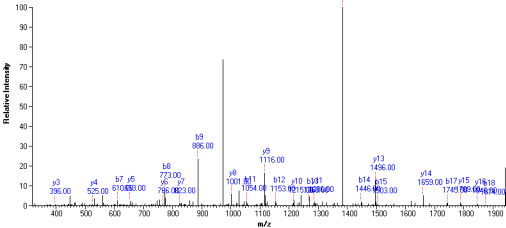

Peptide: \_GHATLGGPNTTYVFK(ac)AGEEAVPLEAGHR\_Charge: 3+\_m/z: 980.83\_MassError: 3.4484841ppm\_RetentionTime: 34.302min\_MascotScore: 46.48

Relative Intensity

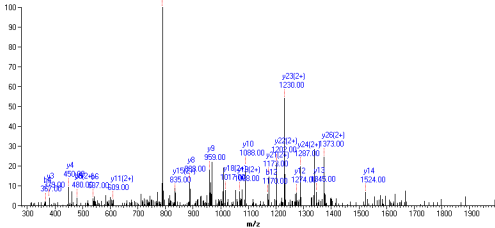

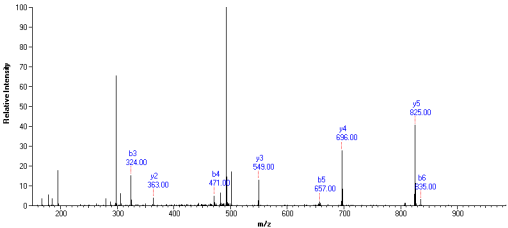



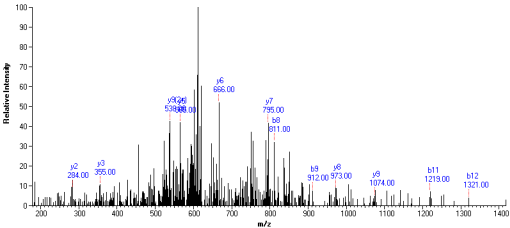

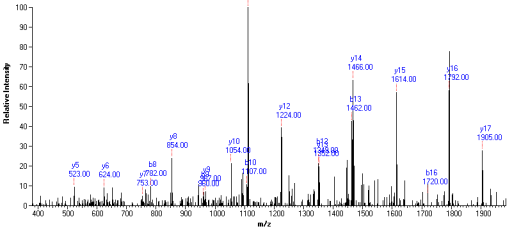

Peptide: \_GIDK(ac)AVTAAVEELK(Iy)\_ Charge: 2+\_m/z: 751.43\_MassError: 2.6816812ppm\_RetentionTime: 34.764min\_MaxCotScore: 77.01

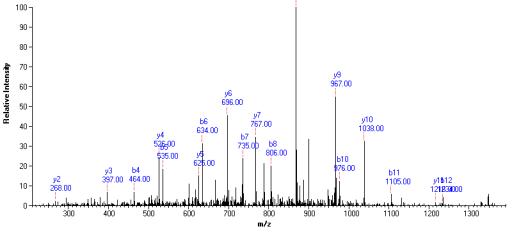

Peptide: \_GIEVGHIFQLGTK(ac)YSEALK(Iy)\_ Charge: 3+\_ m/z: 717.06\_MassError: 3.9201449ppm\_RetentionTime: 42.749min\_MascotScore: 32.69

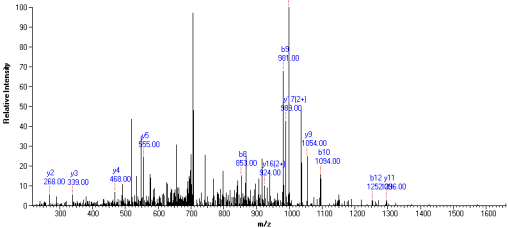

Peptide: \_GIFSEYGLLK(ac)FR\_Charge: 2+\_m/z: 736.4\_MassError: 5.4025967ppm\_RetentionTime: 47.526min\_MascotScore: 29.42

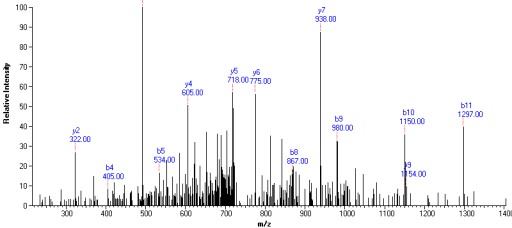

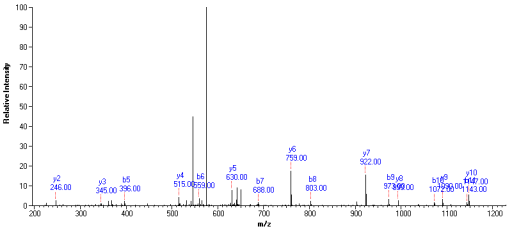

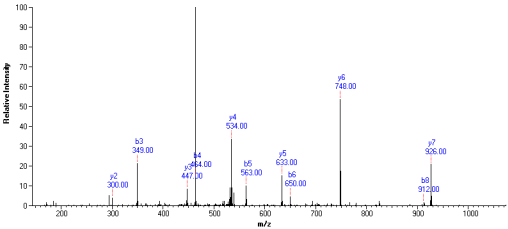

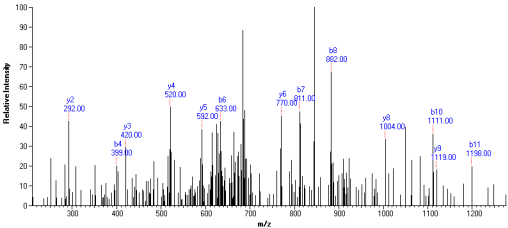



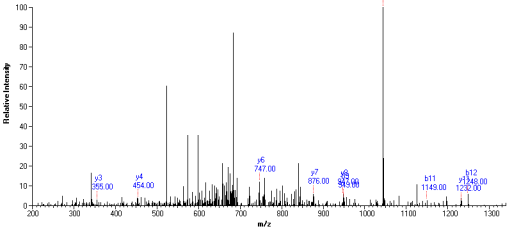

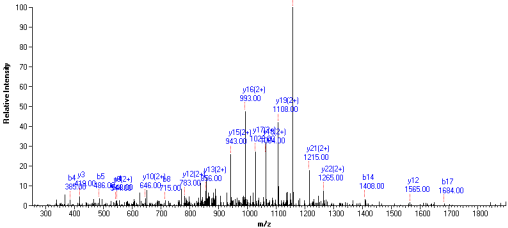

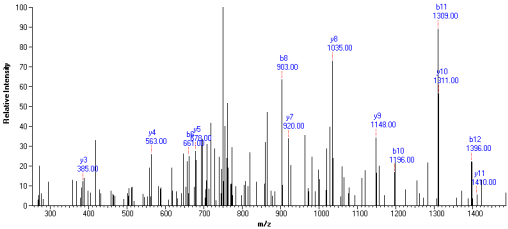

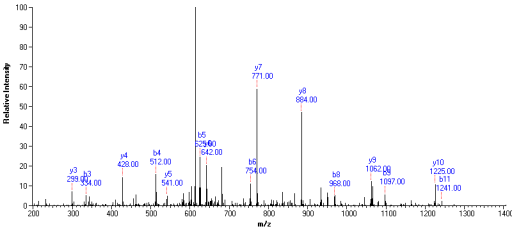

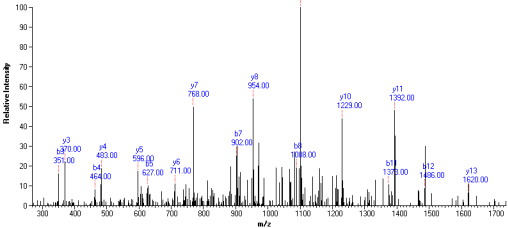

Peptide: \_GK(ac)EFIQVAEEAEK[ly]\_ Charge: 2+\_m/z: 768.4\_MassError: 1.0818042ppm\_RetentionTime: 29.912min\_MascotScore: 80.39

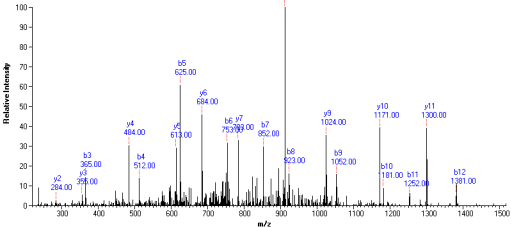

Peptide: \_GK(ac)FYALPQSPQLFK(I) Charge: 2+ m/z: 841.47 MassError: 0.36906285ppm RetentionTime: 34.897min MascotScore: 40

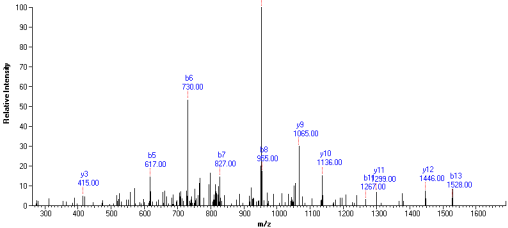

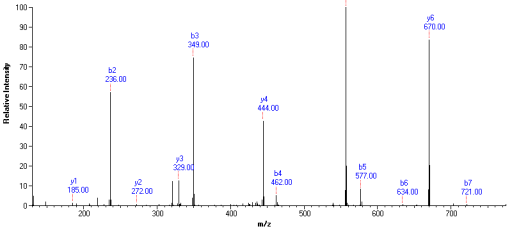



Peptide: \_GK(ac)ILFVGTK(Iy)\_Charge: 2+\_m/z: 510.83\_MassError: 0.81561597ppm\_RetentionTime: 24.796min\_MascotScore: 47.86

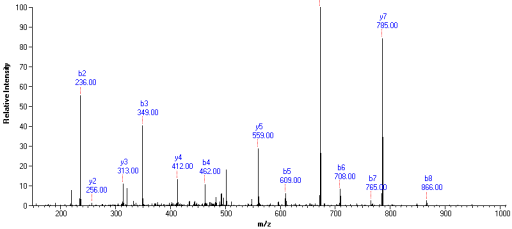

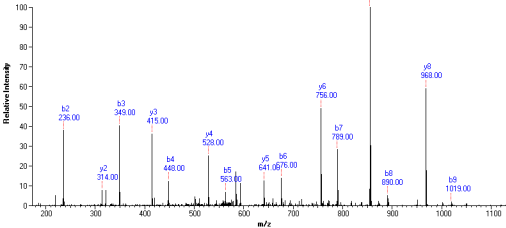

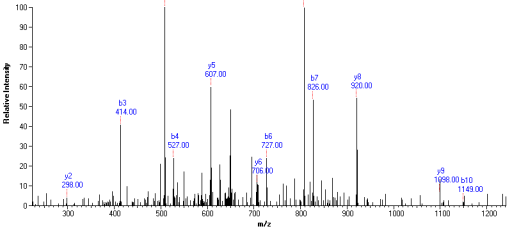

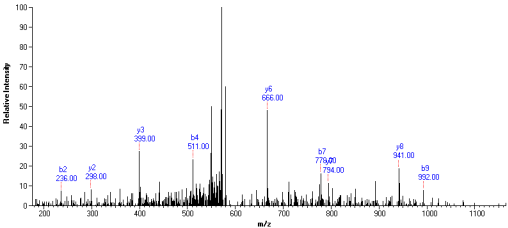

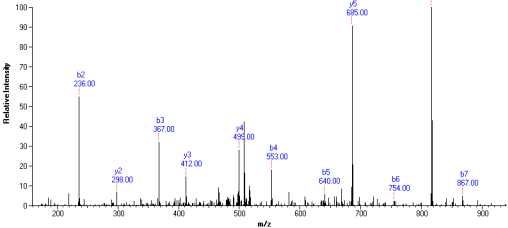

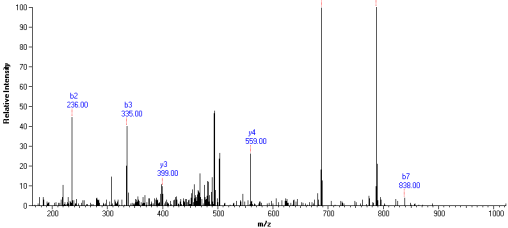

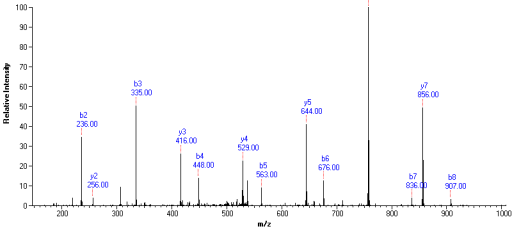

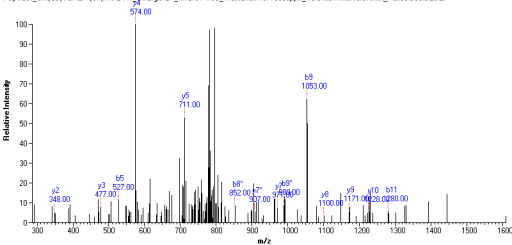



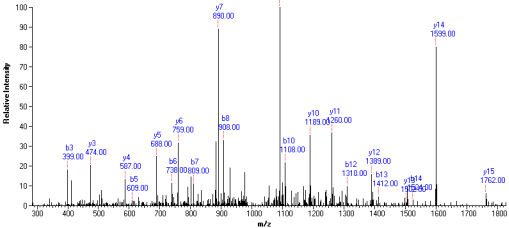

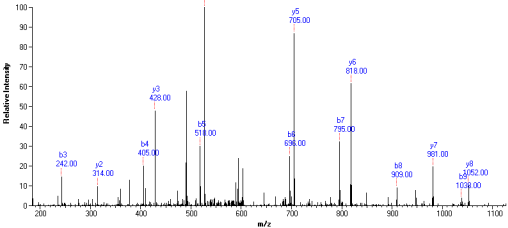

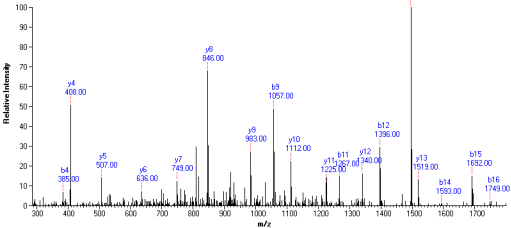

Peptide: \_GLEQLK(ac)MIR\_Charge:2+\_m/z: 558.35\_MassError:1.3772043ppm\_RetentionTime:25.713min\_MascotScore:57.87

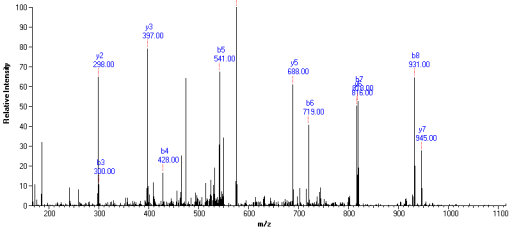

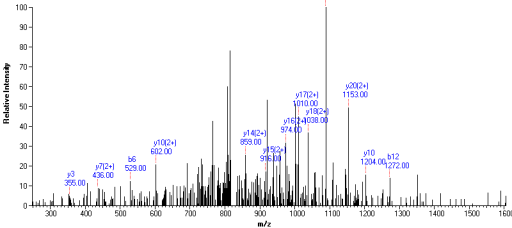

Peptide: \_GLFVK(ac)ELEVALLNR\_Charge: 3+\_m/z: 597.34\_MassError: 0.17716537ppm\_RetentionTime: 47.51min\_MascotScore: 24.43

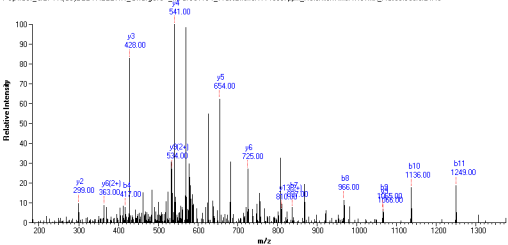

Peptide: \_GLGEAK(ac)LNAK(ac)PAR\_Charge:2+\_m/z: 717.92\_MassError:-0.022910685ppm\_RetentionTime:22.392min\_MassotScore:53.19

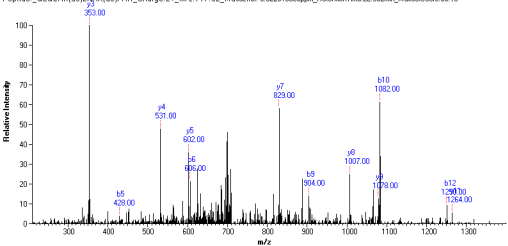

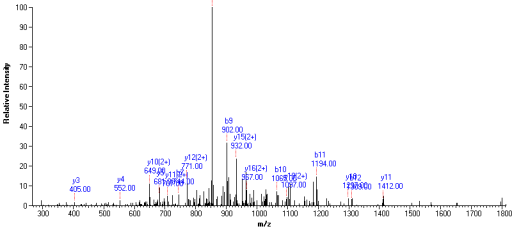



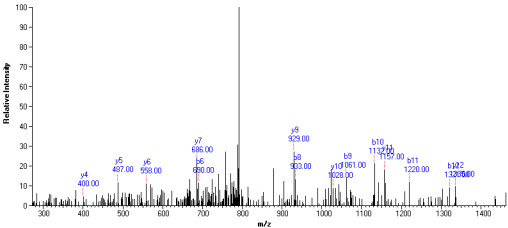

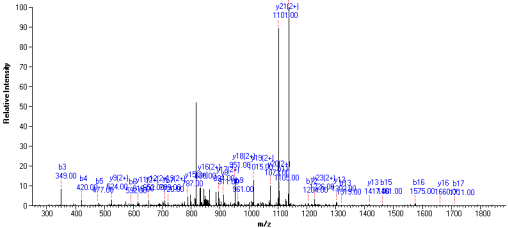

Peptide: \_GLK(ac)AVGPYVYTK(Iy)\_Charge:2+\_m/z:645.39\_MassError:0.83452793ppm\_RetentionTime:24.756min\_MascotScore:34.39

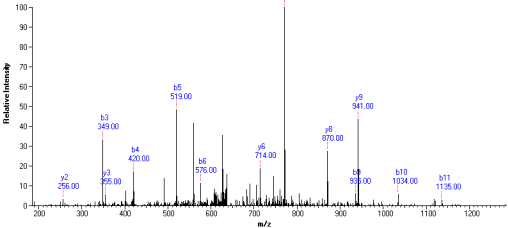

Peptide: \_GLK(ac)FGETYINR\_Charge: 2+\_m/z: 670.35\_MassError: 1.5286958ppm\_RetentionTime: 29.164min\_MascotScore: 57.74

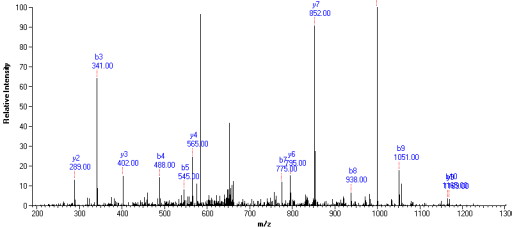

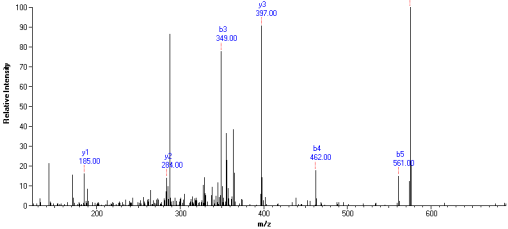

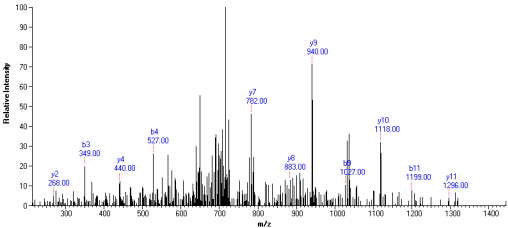

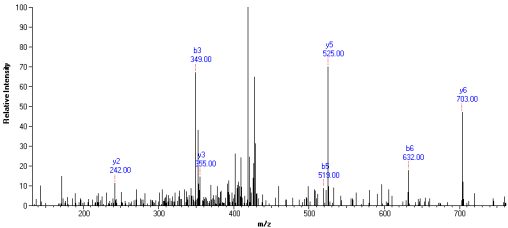

Peptide: \_GLM(ox)LNVTDPASIEVLEK(ac)IR\_Charge: 3+\_m/z: 754.41\_MassError: 2.3529662ppm\_RetentionTime: 50.976min\_MascotScore: 40.53

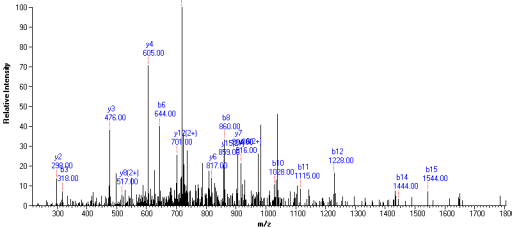



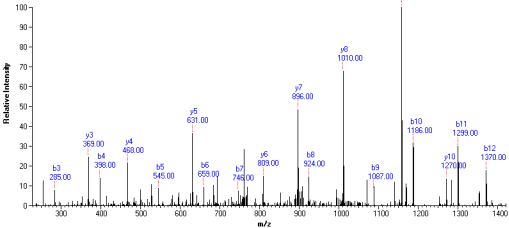

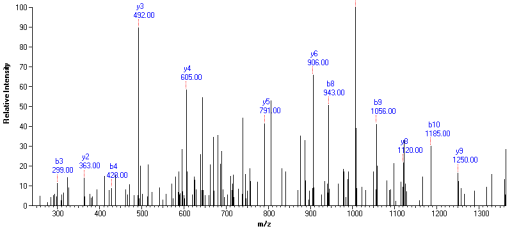

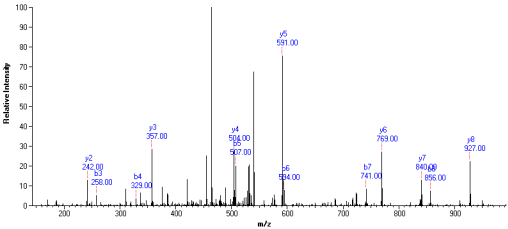

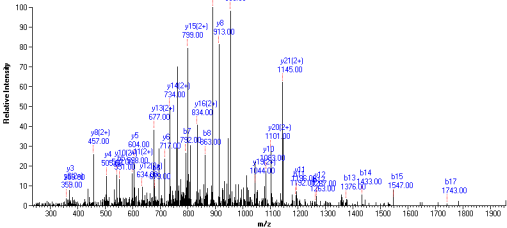

Peptide: \_GLTFTYEPK(ac)YLR\_Charge:2+\_m/z:742.42\_MassError:2.639149ppm\_RetentionTime:36.718min\_MascotScore:41.23

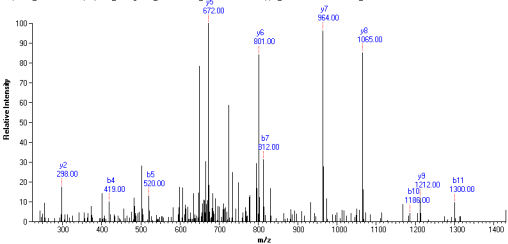

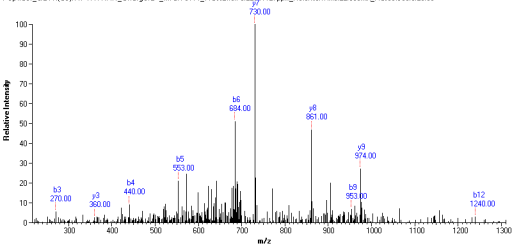

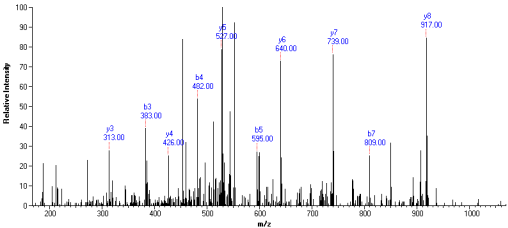

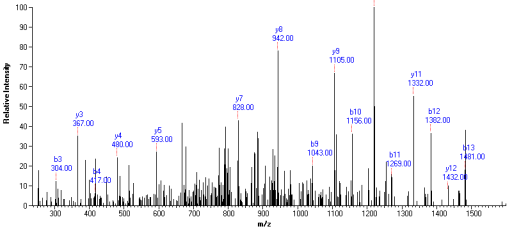



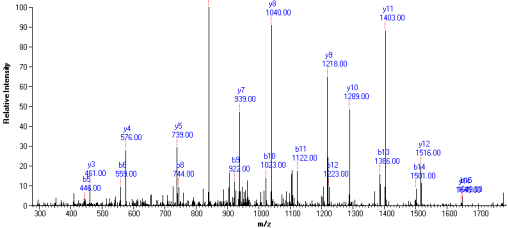

Peptide: \_GMK(ac)GAIQK(ly)\_Charge: 2+\_m/z: 445.76\_MassError: 1.1534672ppm\_RetentionTime: 11.803min\_MascotScore: 30.58

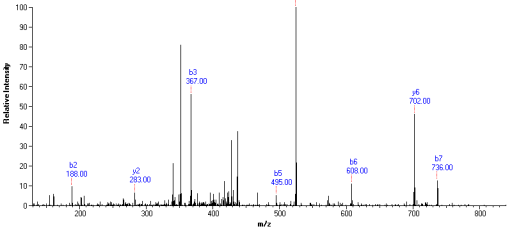

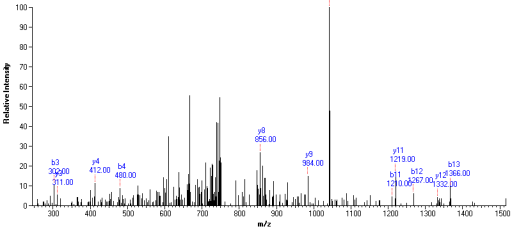

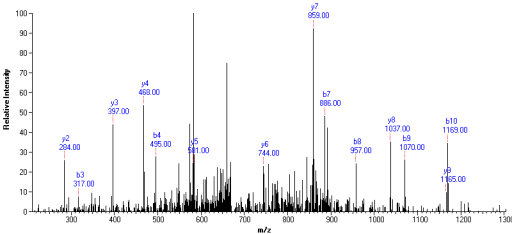

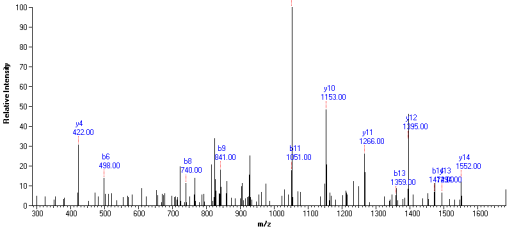

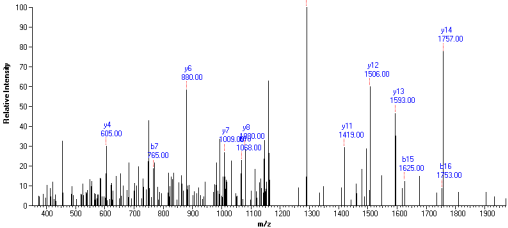

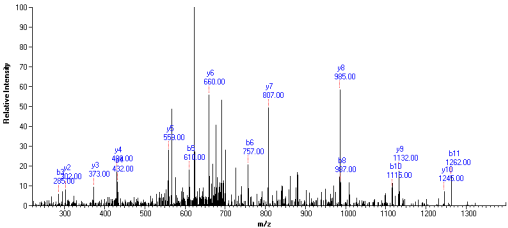

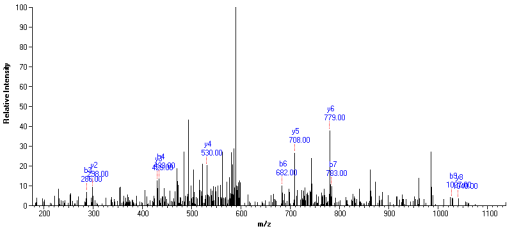



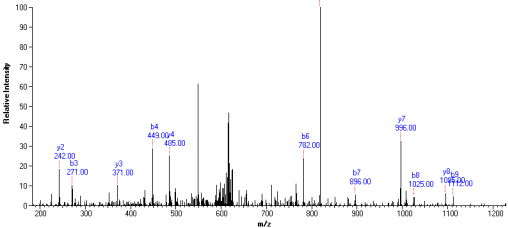

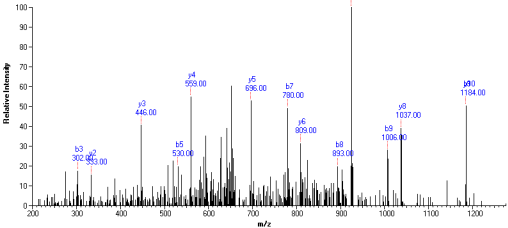

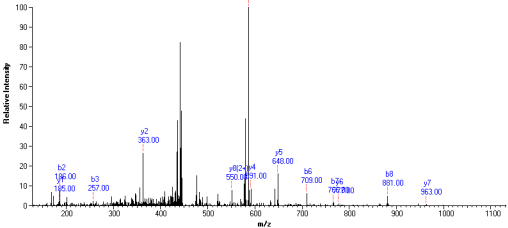

Peptide: \_GQALK(ac)ILLLDALR\_Charge: 2+\_m/z: 685.93\_MassError: 2.9518678ppm\_RetentionTime: 50.5min\_MascotScore: 81.81

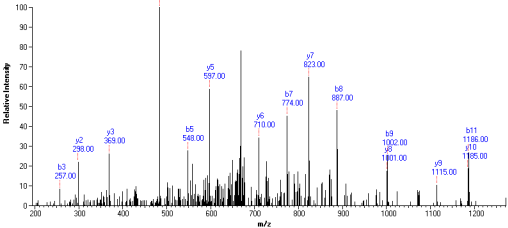

Peptide: \_GQDSEEVIAK(ac)R\_Charge: 2+\_m/z: 646.34\_MassError: 3.3973341ppm\_RetentionTime: 16.212min\_MascotScore: 65.8

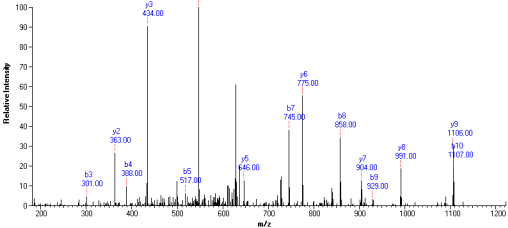

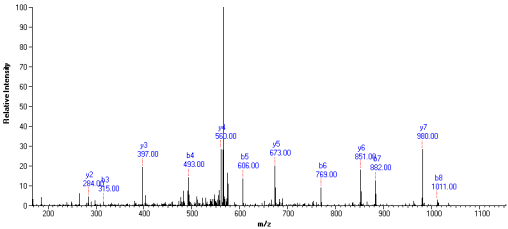

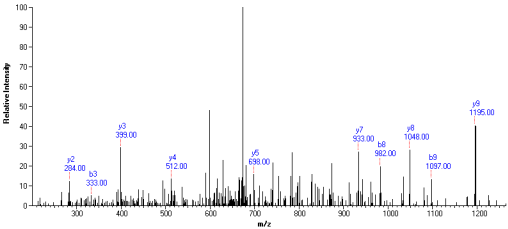

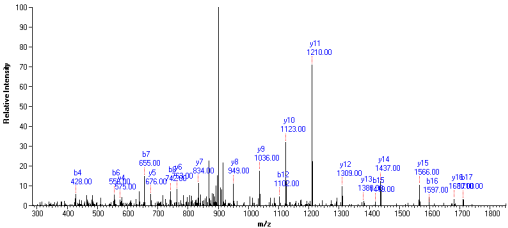



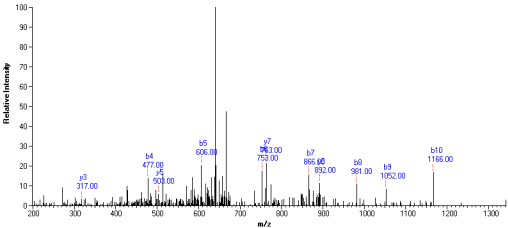

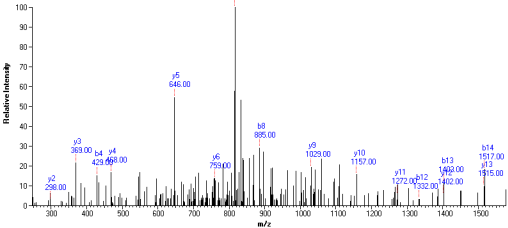

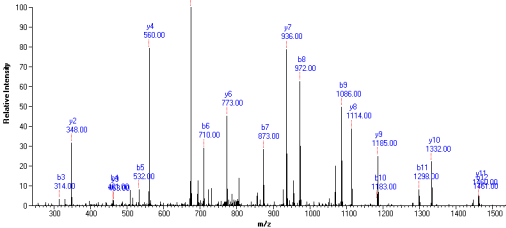

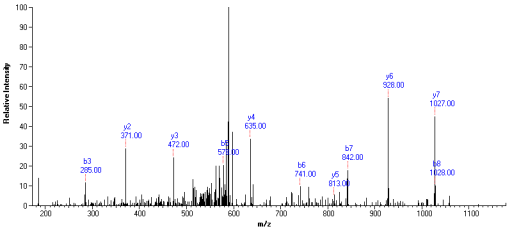

Peptide: \_GQYLAK(ac)PGTIK(Iy)PHIK(Iy)\_Charge:2+\_m/z:821\_MassError:0.6550001ppm\_RetentionTime:9.1599min\_MascotScore:67.51

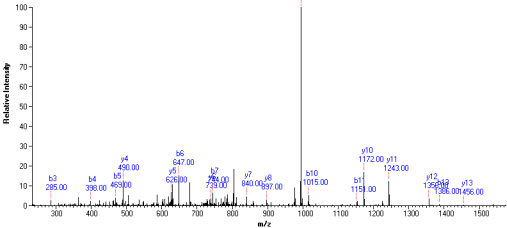

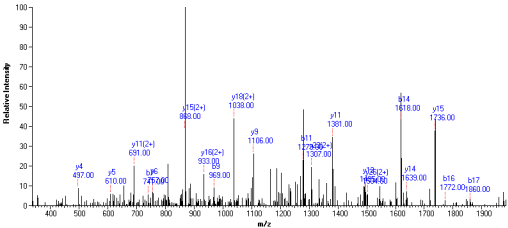

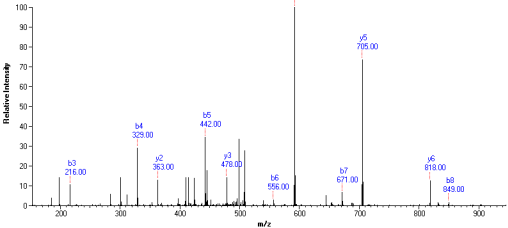

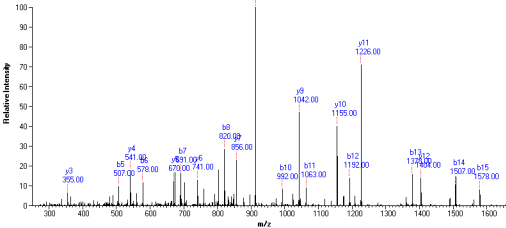



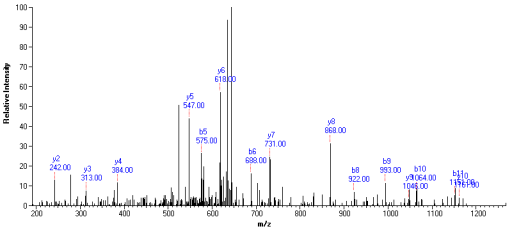

Peptide: \_GSFIK(ac)YGIDQQETSLK([y]\_Charge: 2+\_m/z: 936.99\_MassError: 3.4768465ppm\_RetentionTime: 33.264min\_MascotScore: 21.98

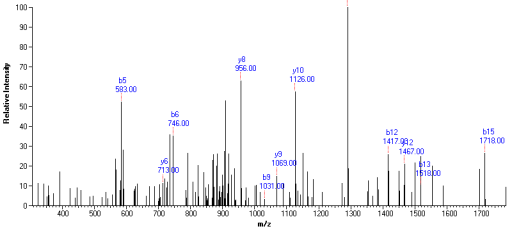

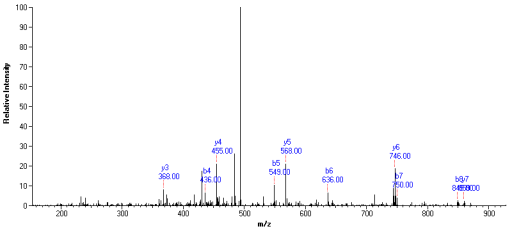

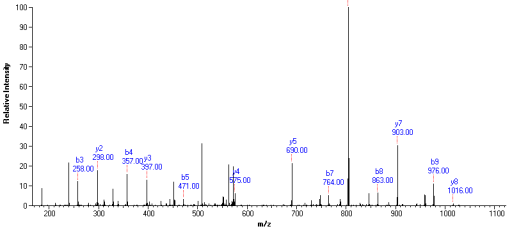

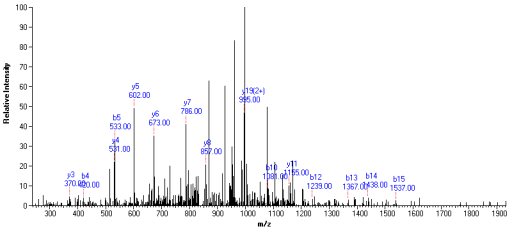

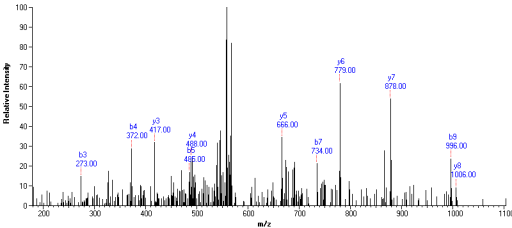

Peptide: \_GSSLQQGFQK(ac)PAQAVNR\_Charge:2+\_m/z: 938.49\_MassError:1.5308681ppm\_RetentionTime:18.45min\_MascotScore:80.64

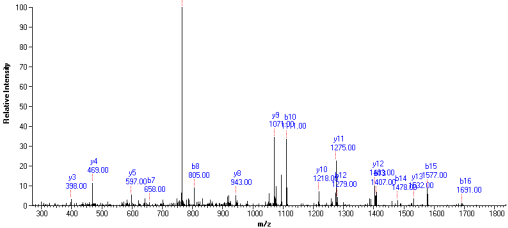

Peptide: \_GTADEK(ac)FAALEAAGVK(ly)\_Charge: 2+\_m/z: 818.43\_MassError: 1.5888ppm\_RetentionTime: 38.172min\_MaxcotScore: 98

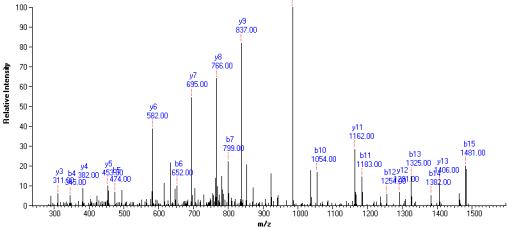



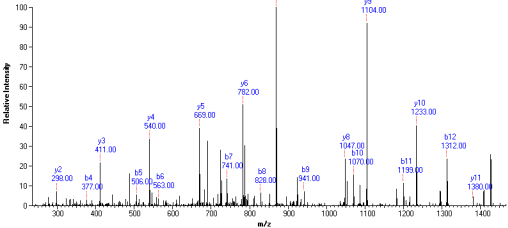

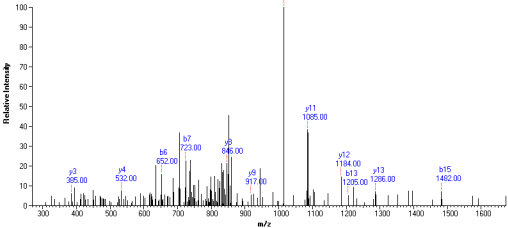

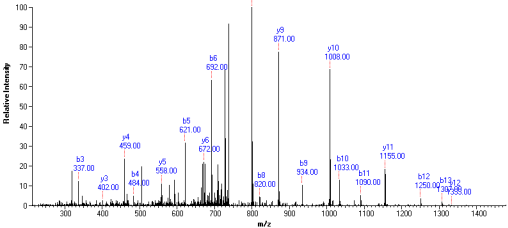

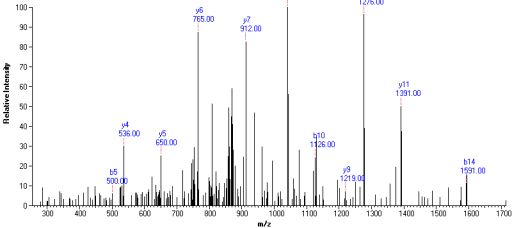

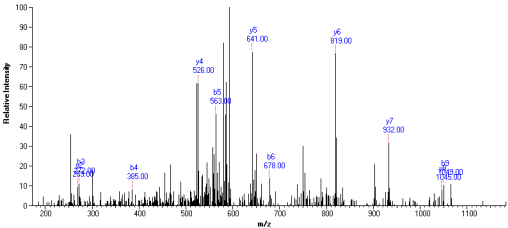

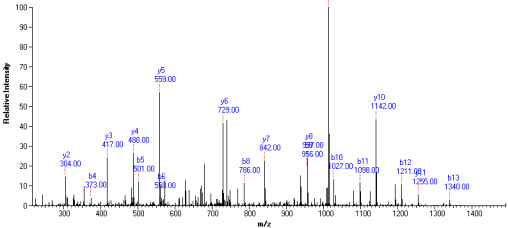

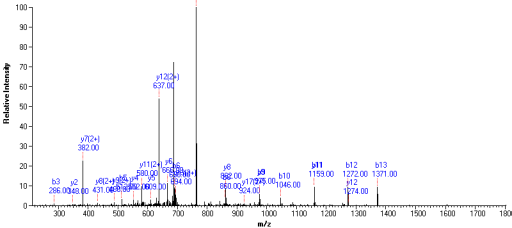

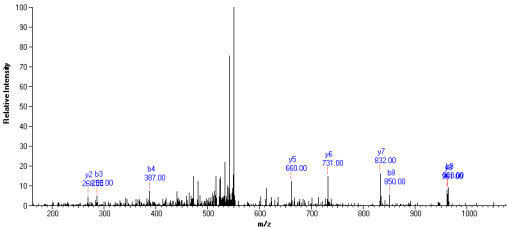



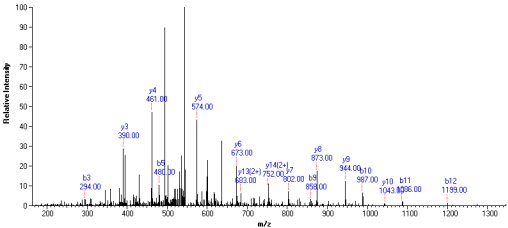

Peptide: \_GVICEK(ac)IGVEVTQTK(y)\_Charge:2+\_m/z: 883.44\_MassError:1.7862832ppm\_RetentionTime:17.788min\_MascotScore:87.49

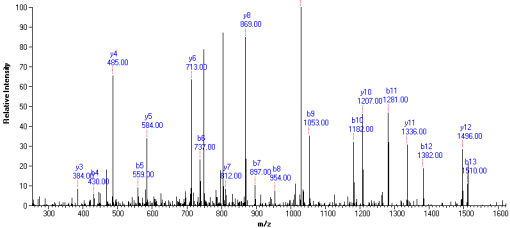

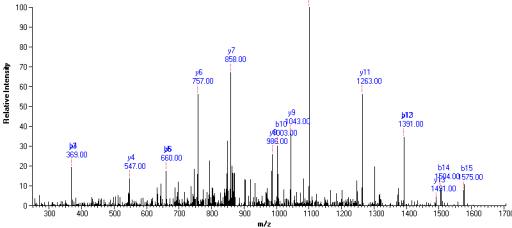

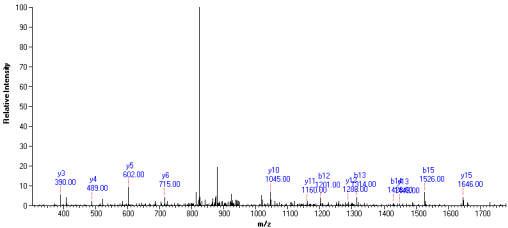

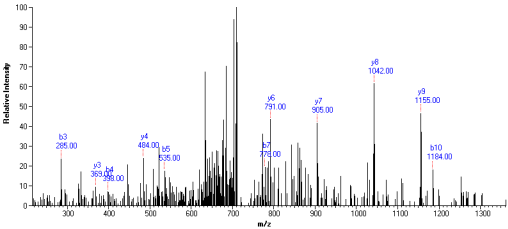

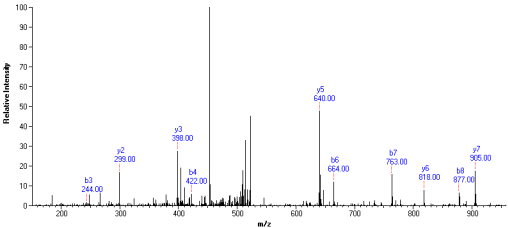

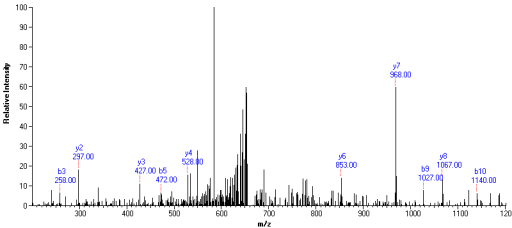

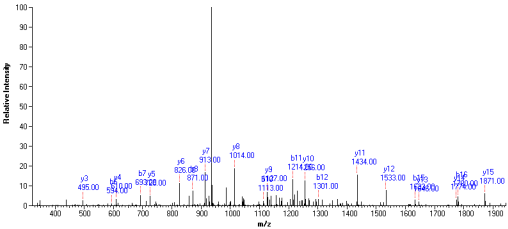



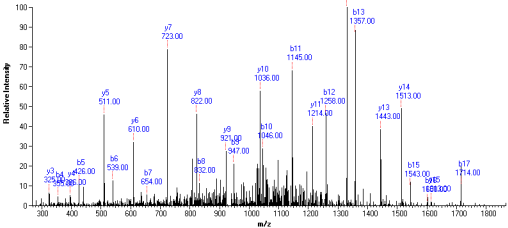

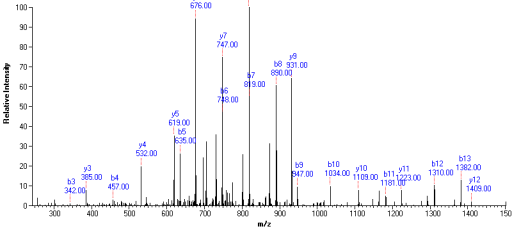

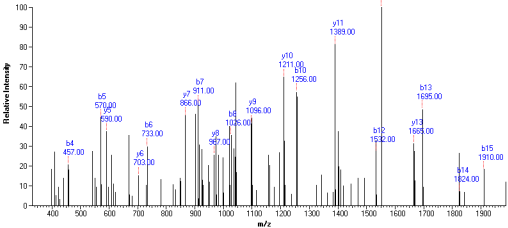

Peptide: \_GYAQK(ac)DPK(Iy)\_Charge: 2+\_m/z: 482.76\_MassError: 1.2484696ppm\_RetentionTime: 6.9369min\_MascotScore: 39.17

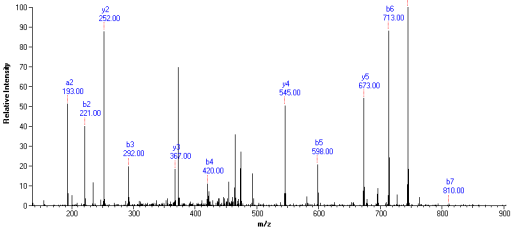

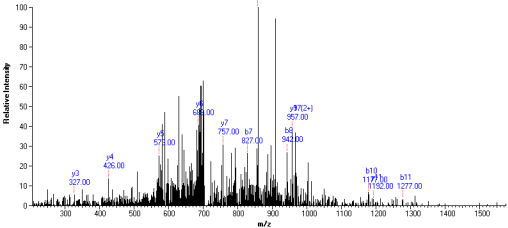

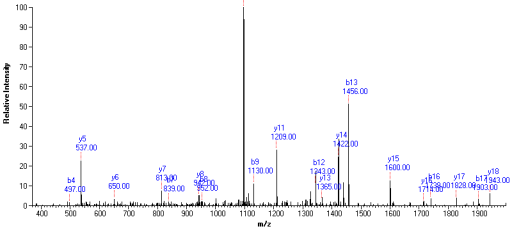

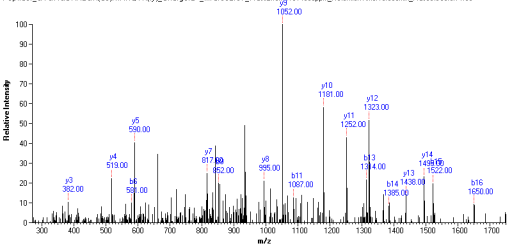

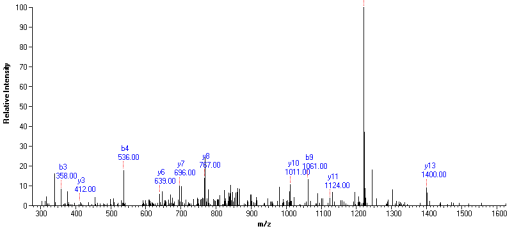



Peptide: \_GK(ac)MVSGGTDNHLFLYDLVDK(Iy)\_ Charge: 3+\_ m/z: 779.08, Mass Error: 0.44558194ppm, RetentionTime: 42.449min, MascotScore: 20.89

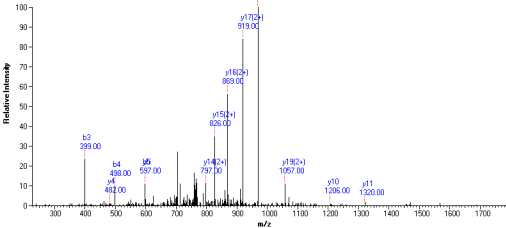

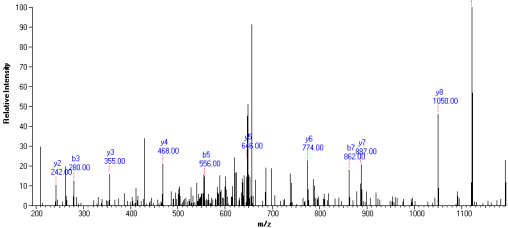

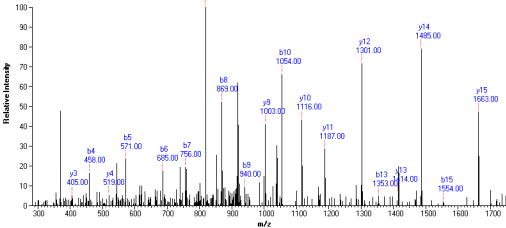

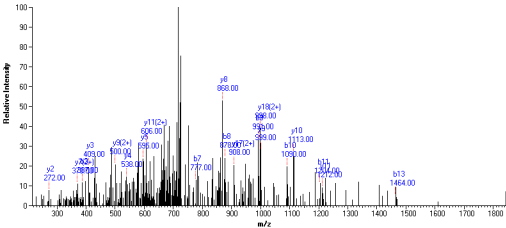

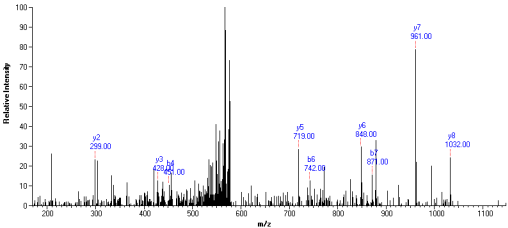

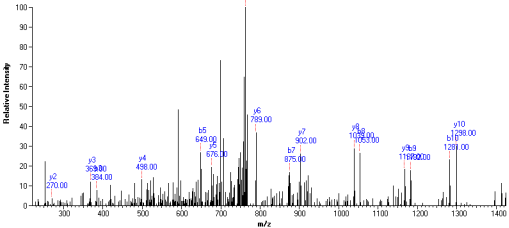

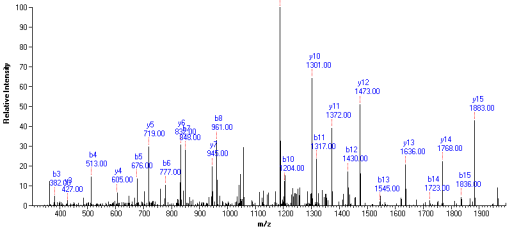

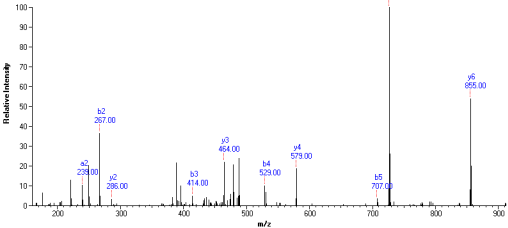



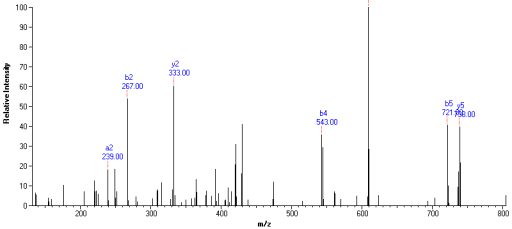

Peptide: \_HEIHK(ac)TTLPK(Iy)\_Charge:2+\_m/z:619.38\_MassError:0.95059907ppm\_RetentionTime:13.975min\_MascotScore:57.22

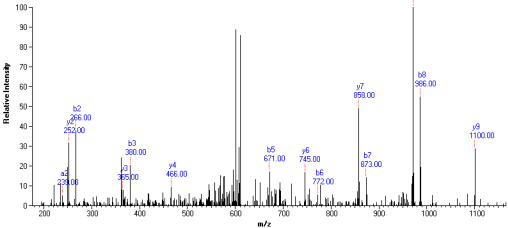

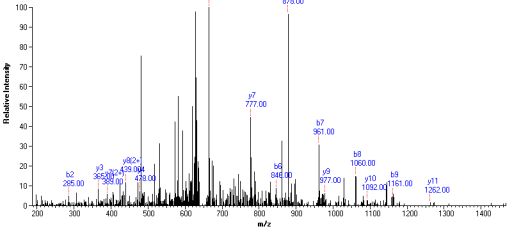

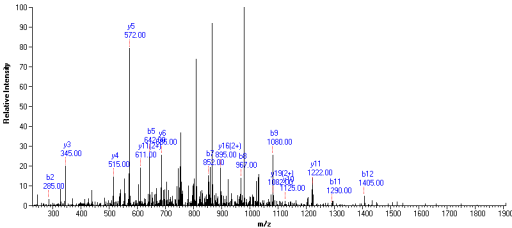

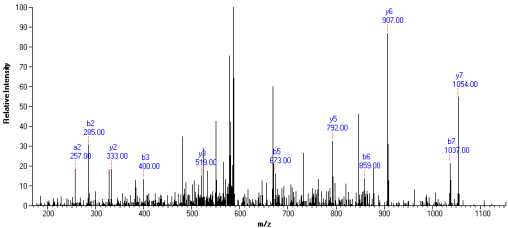

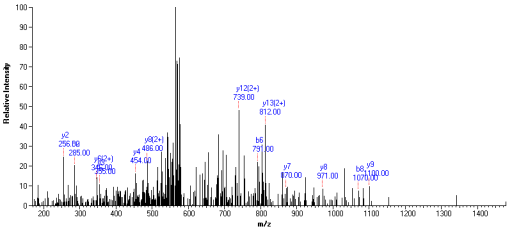

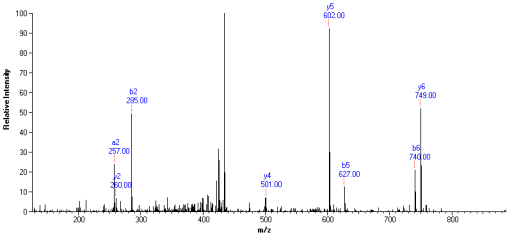

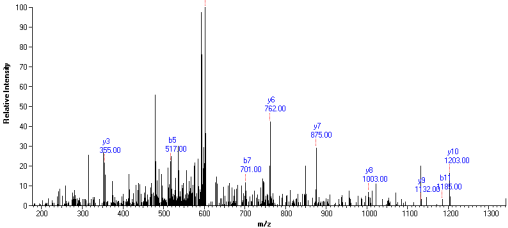



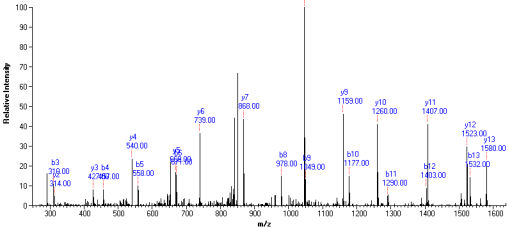

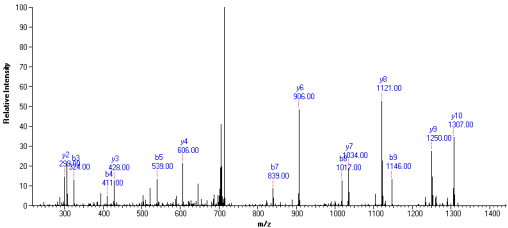

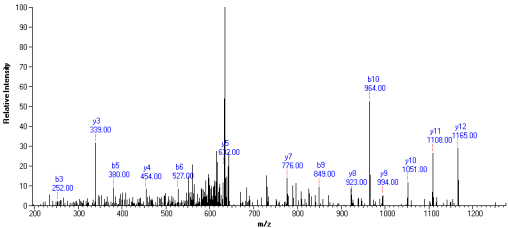

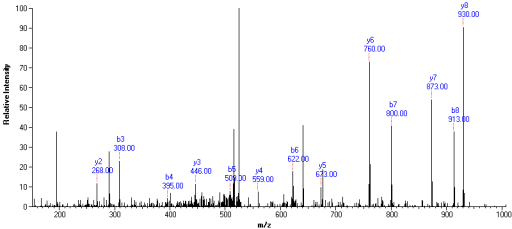

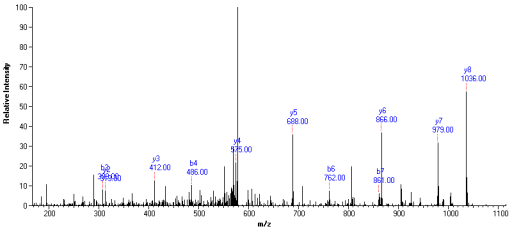

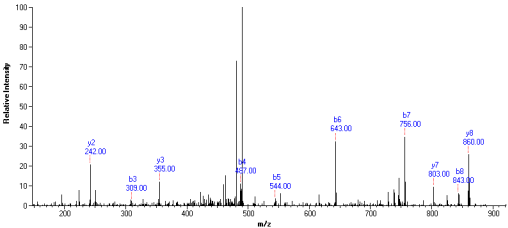

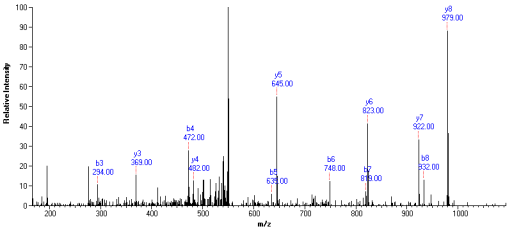

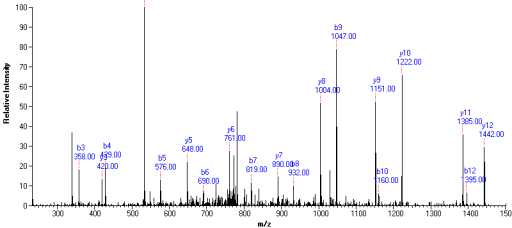



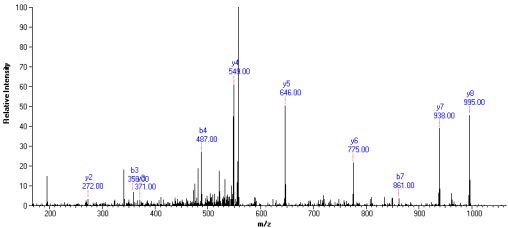

Peptide: \_HHCEK(ac)TYLYTLESPVADDTAEQFAK(Iy)\_Charge: 3+\_m/z: 983.48\_MassError: 2.185511ppm\_RetentionTime: 27.279min\_MascotScore: 51.2

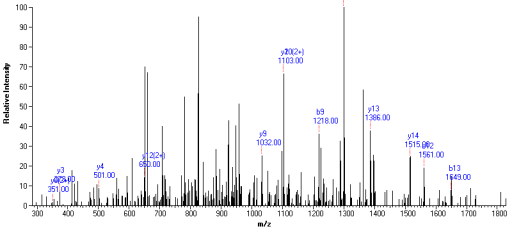

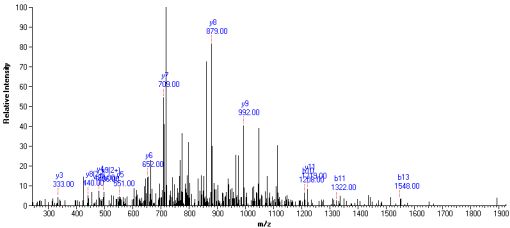

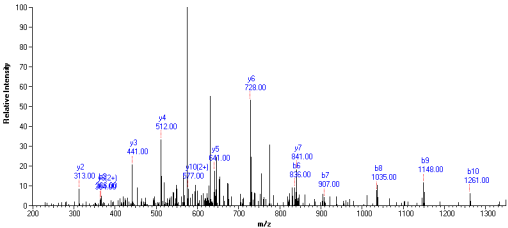

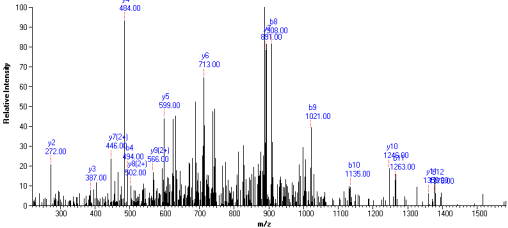

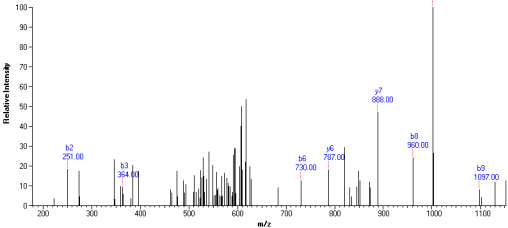

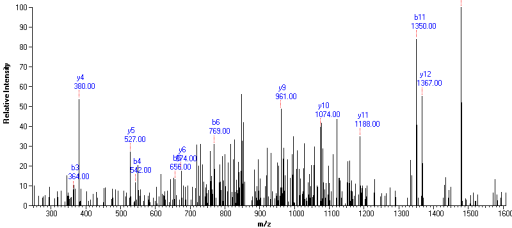

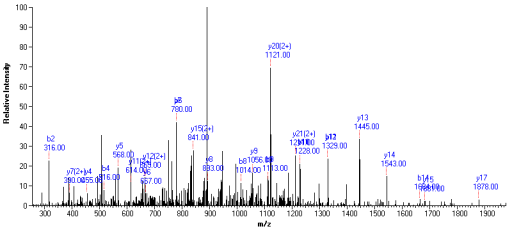



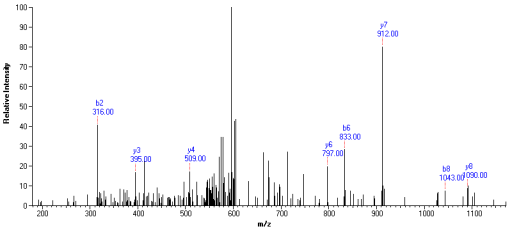

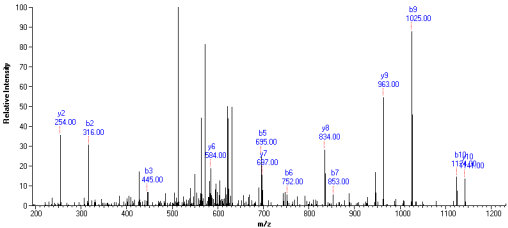

Peptide: **\_HK(ac)IFNADwVIDGEQQPK(y)** Charge: 2+  $m/z$ : 1042.54\_MassError: 0.82118199ppm\_RetentionTime: 33.514min\_MascotScore: 54.27

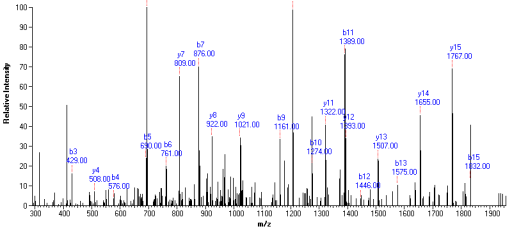

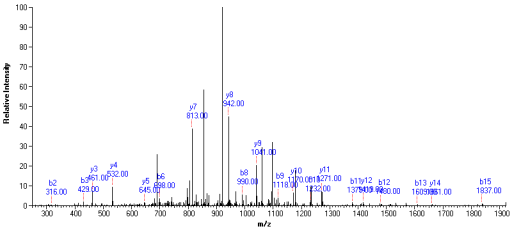

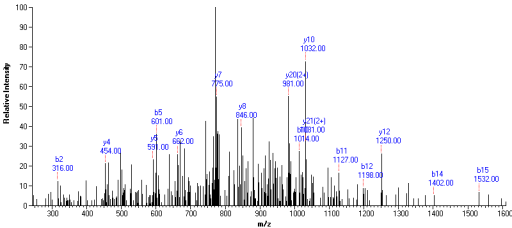

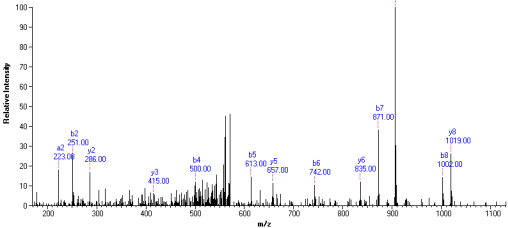

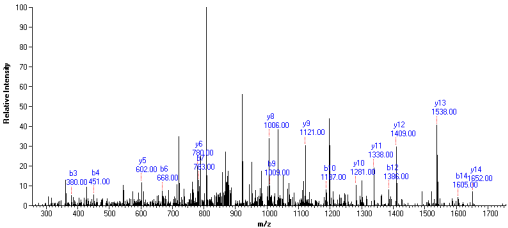

Peptide: \_HLGHPVK(ac)LEIEPGR\_Charge:2+\_m/z: 821.46\_MassError:0.67304589ppm\_RetentionTime:18.498min\_MascotScore:59.96

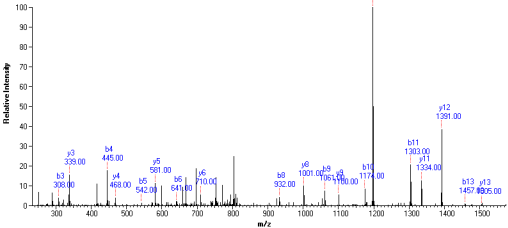



Peptide: \_HLINK(ac)K(Iy)\_Charge: 2+\_m/z: 405.76\_MassError: 2.7499059ppm\_RetentionTime: 5.7557min\_MascotScore: 22.3

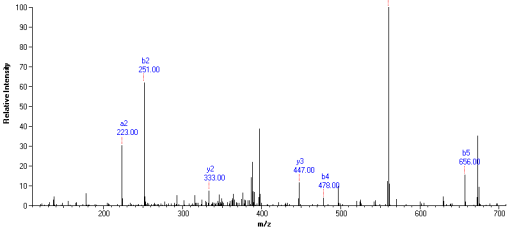

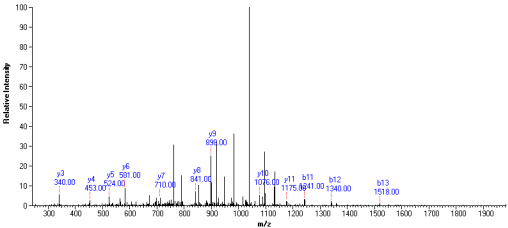

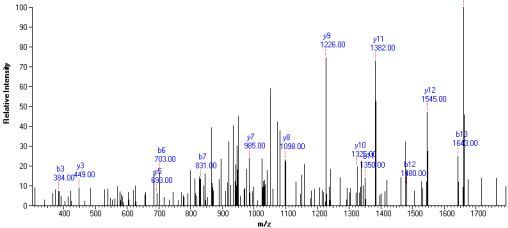

Peptide: \_HNEEYEK(ac)IEGCDDGVIMHLK(Iy)\_Charge:3+\_m/z:825.72\_MassError:1.6648309ppm\_RetentionTime:24.316min\_MascotScore:61.1

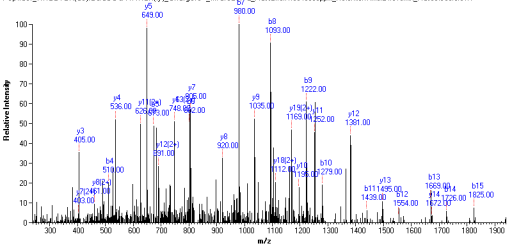

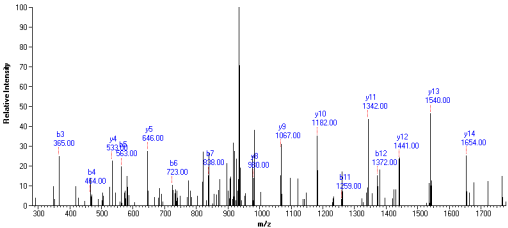

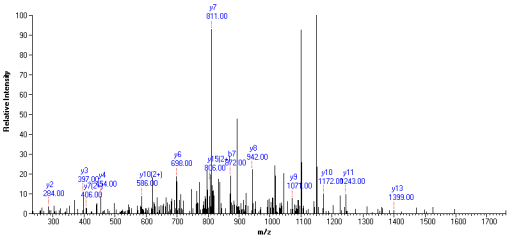

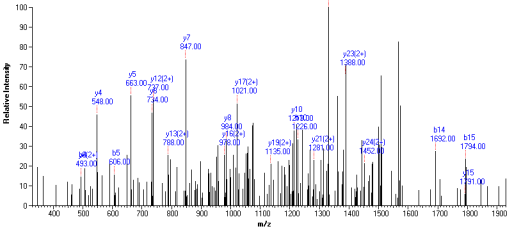

Peptide: \_HNQQVVL FHK(ac)LENLRF\_Charge: 3+\_m/z: 645.69\_MassError: 0.58852692ppm\_RetentionTime: 27.99min\_MascotScore: 68.59

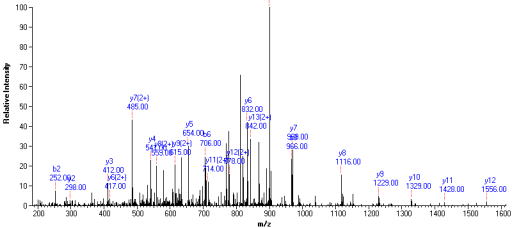



Peptide: \_HPEK(ac)Y<sup>3</sup>PQLTIR\_Charge: 3+ m/z: 481.27\_MassError: 0.10669251ppm\_RetentionTime: 22.207min\_MascotScore: 36.14

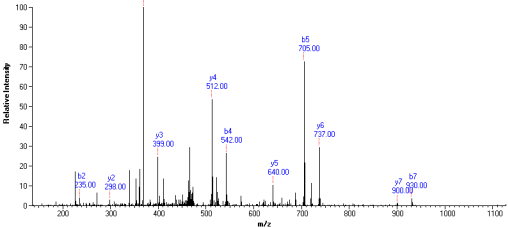

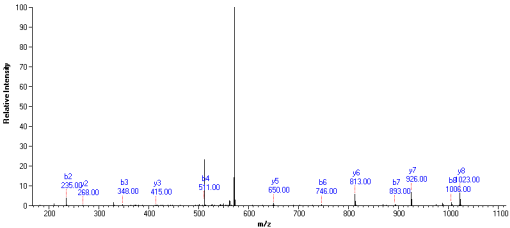

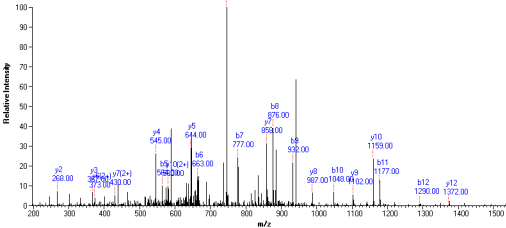

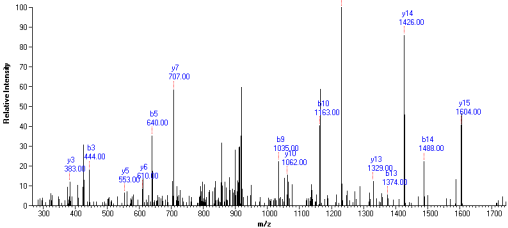

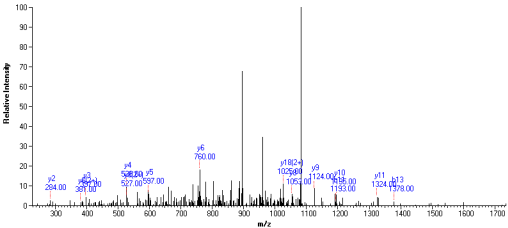

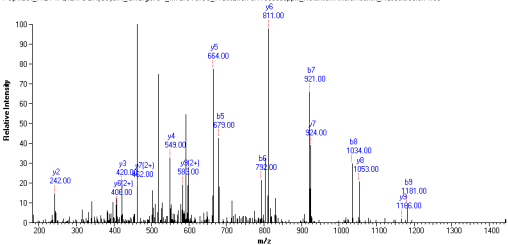

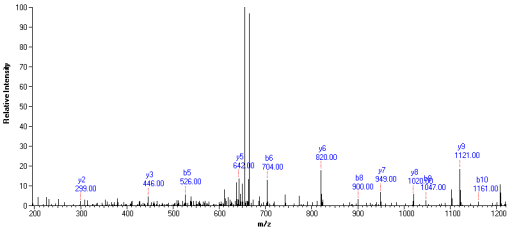

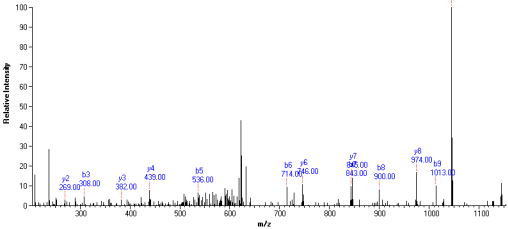



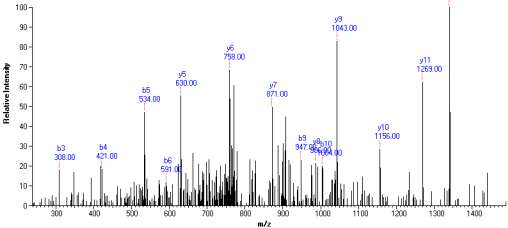

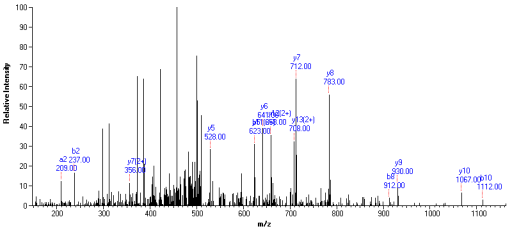

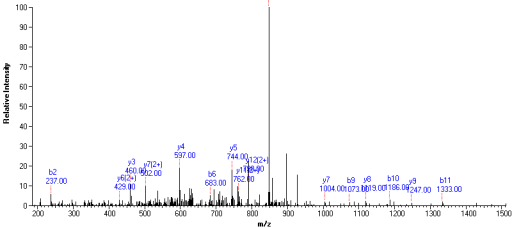

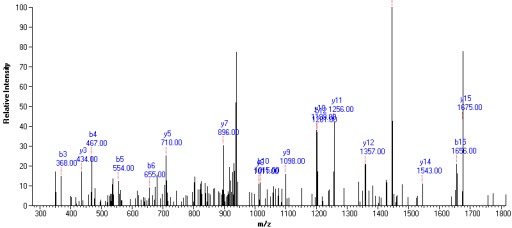

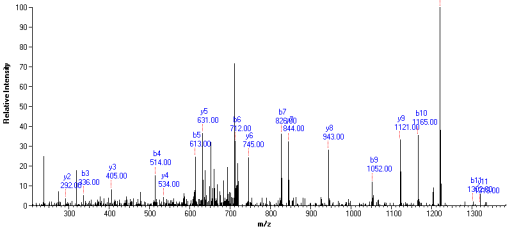

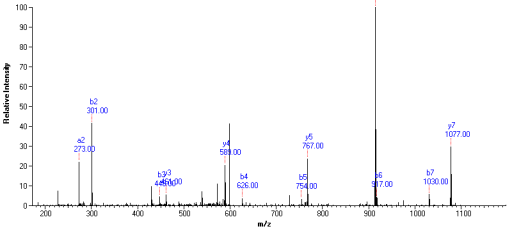

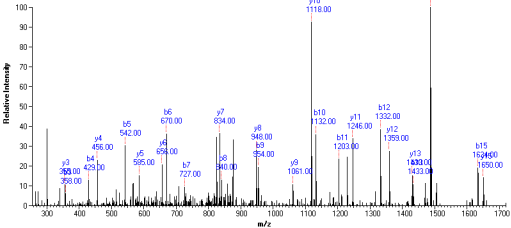

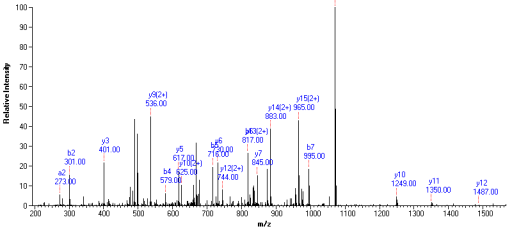



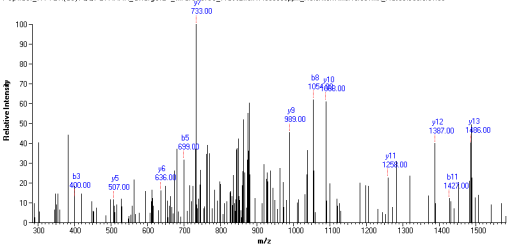

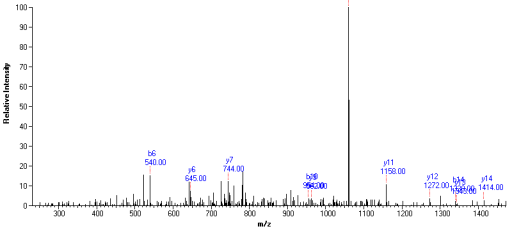

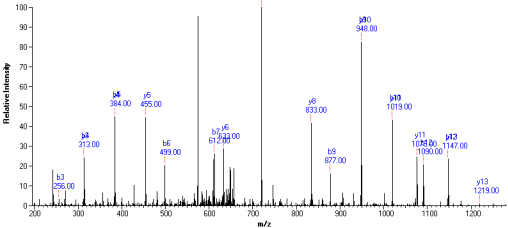

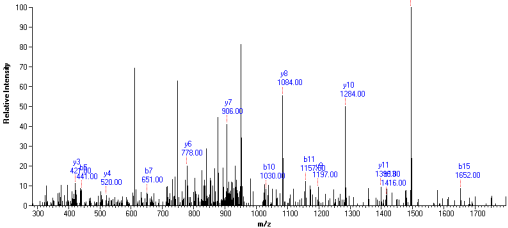

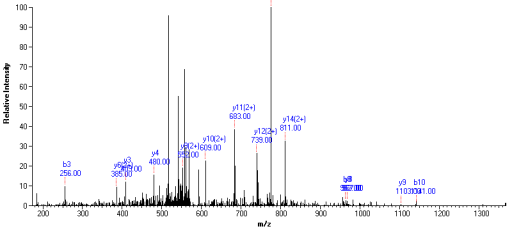

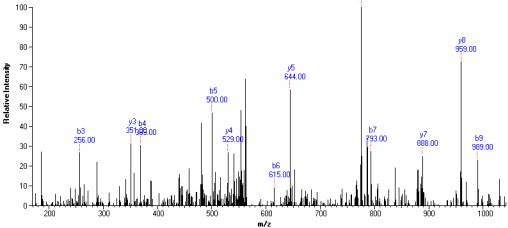

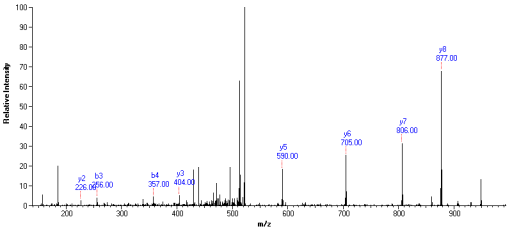

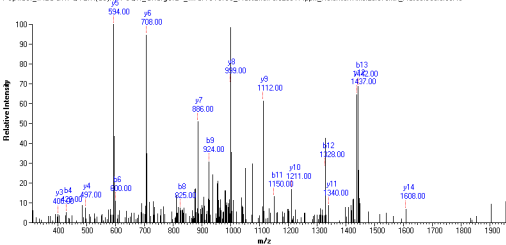



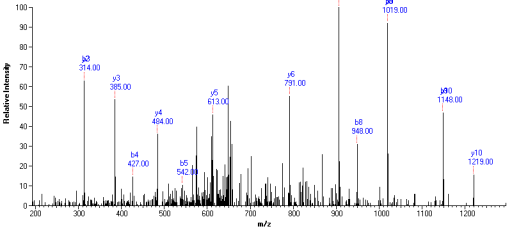

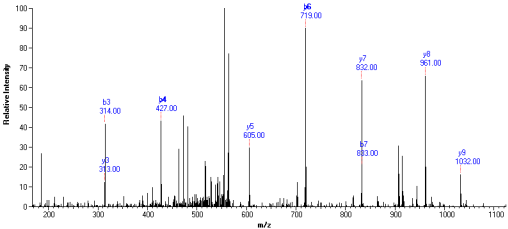

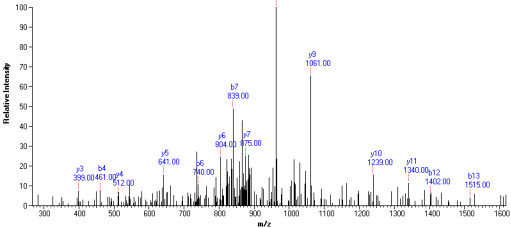

Peptide: \_IAEVDGNDPLFK(ac)VK(Iy)\_Charge:2+\_m/z:801.94\_MassError:6.5396736ppm\_RetentionTime:32.583min\_MascotScore:53.13

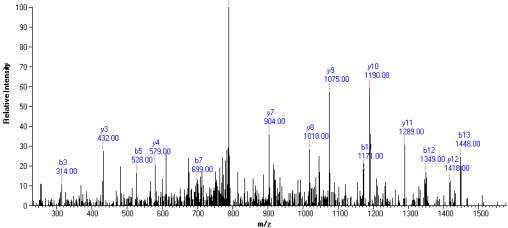

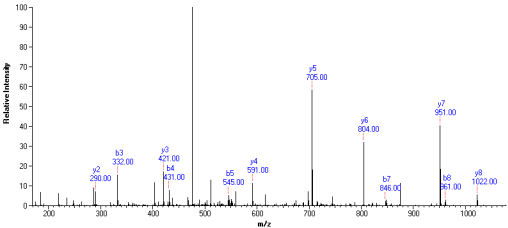

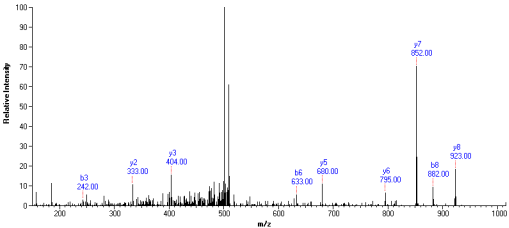

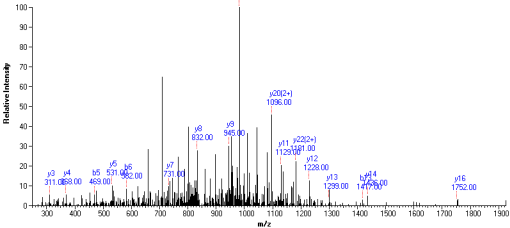

Peptide: \_LAGLEVK(ac)R\_Charge:2+\_m/z: 473.3\_MassError:0.2782727ppm\_RetentionTime:18.82min\_MaxcotScore:50.75

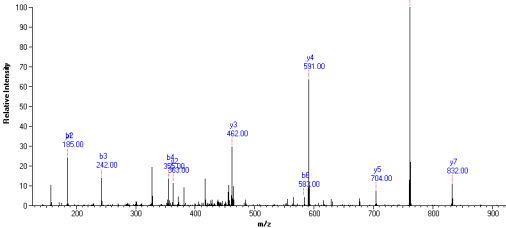



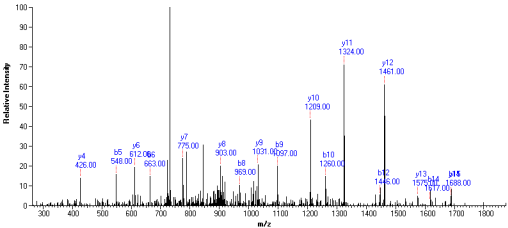

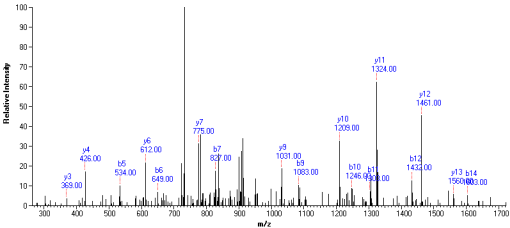

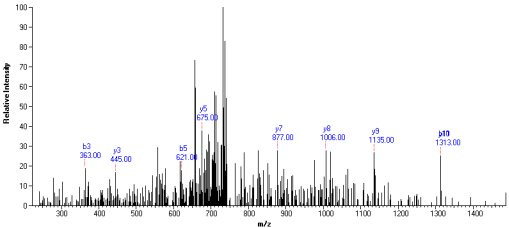

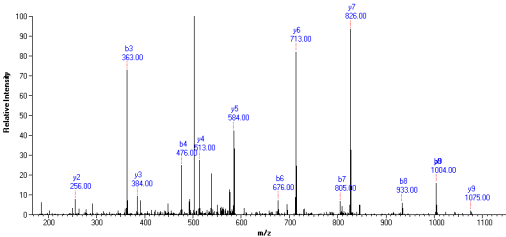

Peptide: \_IAK(ac)LGDR\_Charge: 2+\_m/z: 416.75\_MassError: 0.63359553ppm\_RetentionTime: 12.811min\_MascotScore: 28.33

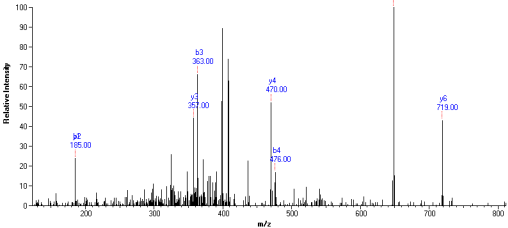

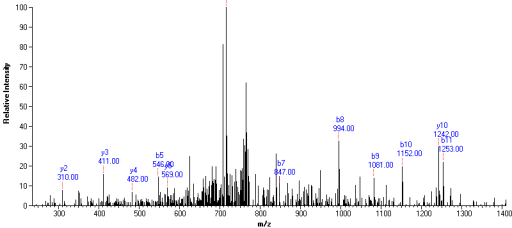

Peptide: \_IALESVLLGDK(ac)E\_Charge: 2+\_m/z: 668.88\_MassError: 3.1071814ppm\_RetentionTime: 47.304min\_MascotScore: 37.57

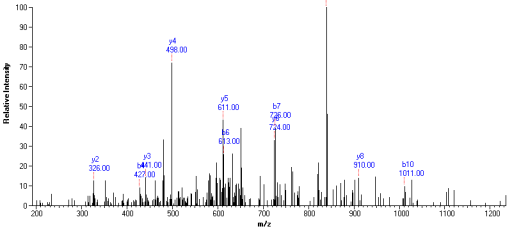

Peptide: \_IALFCNVPEK(ac)AVISLK(fy)\_Charge: 2+\_m/z: 930.54\_MassError: 3.5027539ppm\_RetentionTime: 44.655min\_MascotScore: 61

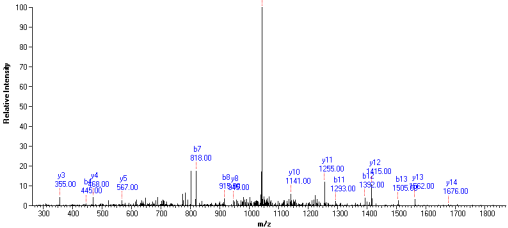



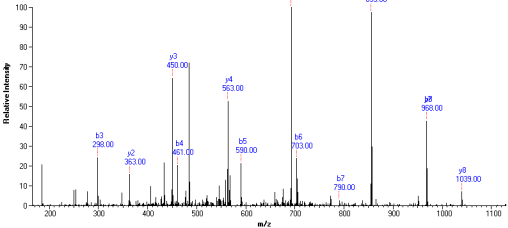

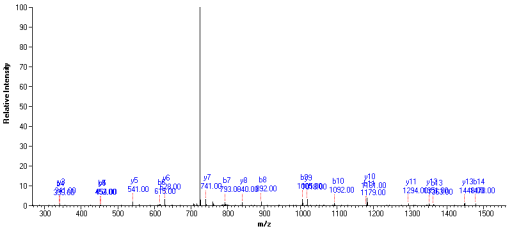

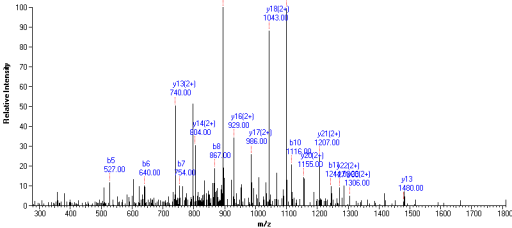

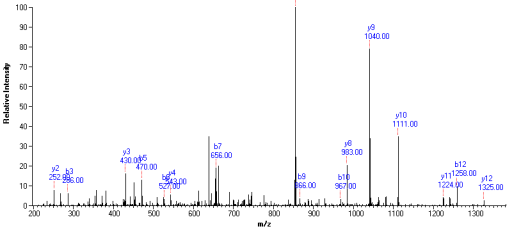

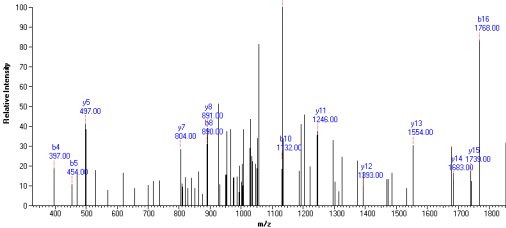

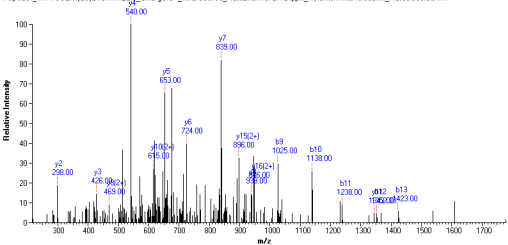

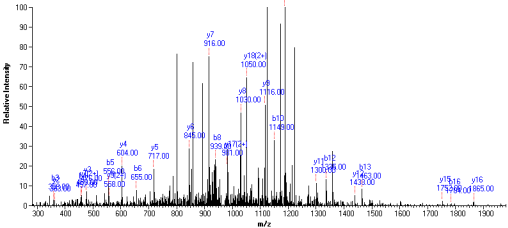

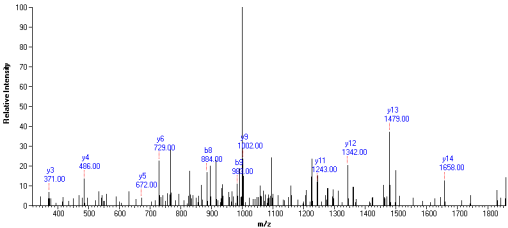



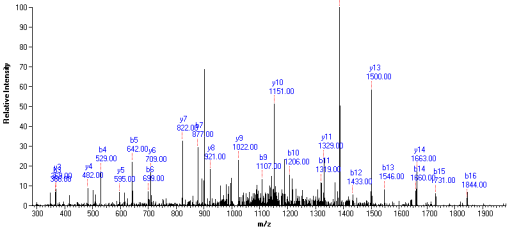

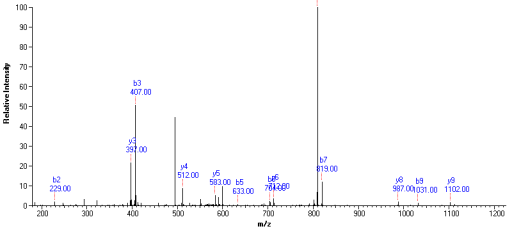

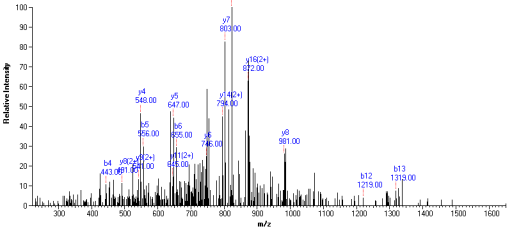

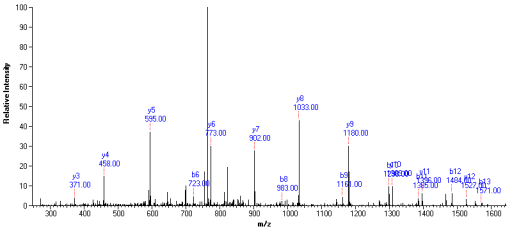

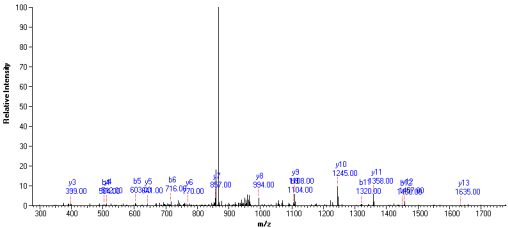

Peptide: \_IDVK(ac)ILDPB\_Charge: 2+\_m/z: 564.84\_MassError: 0.8154547ppm\_RetentionTime: 30.981min\_MascotScore: 40.46

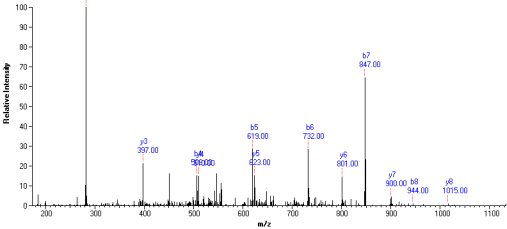

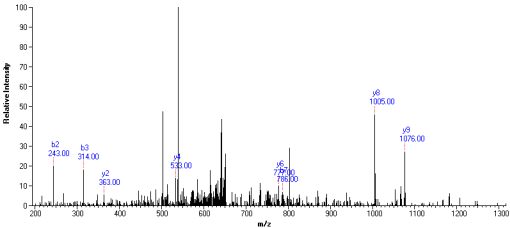

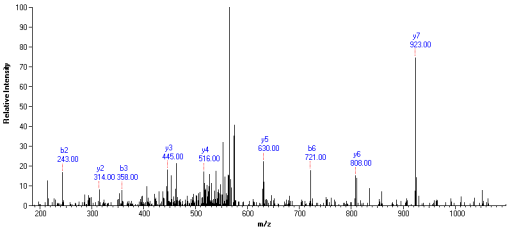



Peptide: \_IEEALGEEK(ac)APYNGR\_Charge:2+\_m/z: 803.91\_MassError:1.6771735ppm\_RetentionTime:23.372min\_MascotScore:84.4

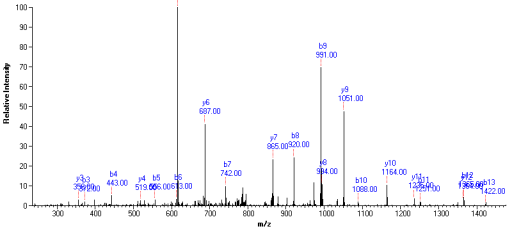

Peptide: \_IEEDK(ac)ILQAK(Iy)\_Charge: 2+\_m/z: 622.86\_MassError: -3263.0223ppm\_RetentionTime: 19.011min\_MassotScore: 61.11

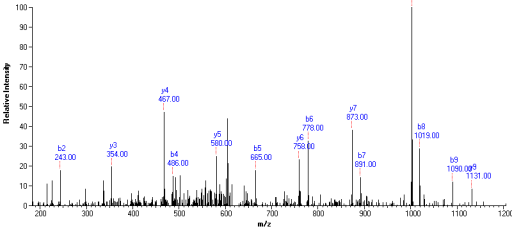

Peptide: \_IEGILEK(ac)LK(Iy)\_Charge: 2+\_m/z: 550.85\_MassError: -0.82977825ppm\_RetentionTime: 35.993min\_MascotScore: 31.8

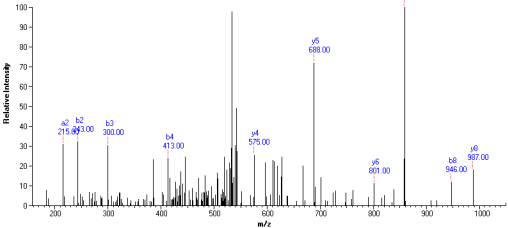

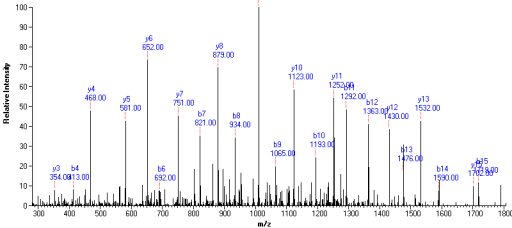

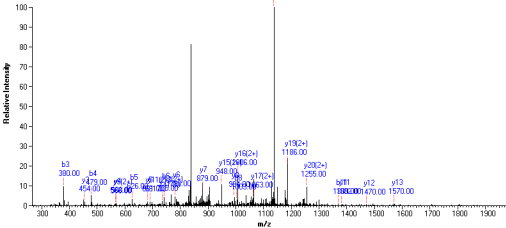

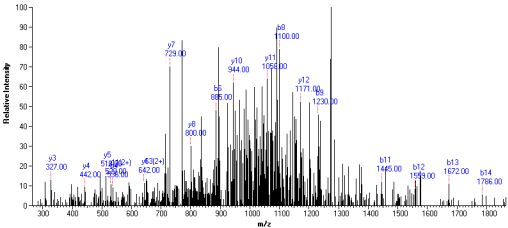

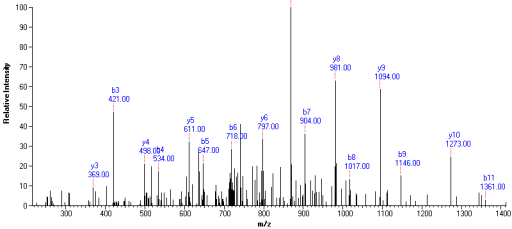

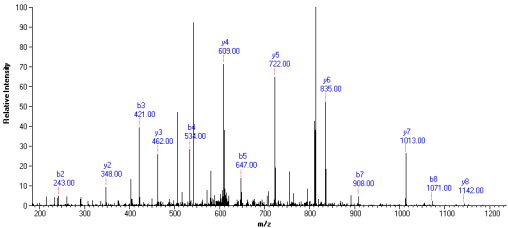



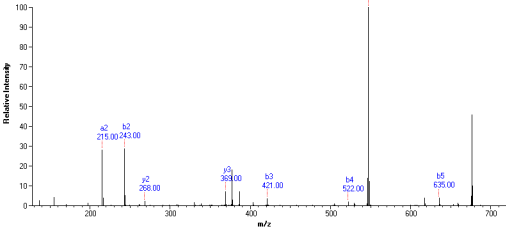

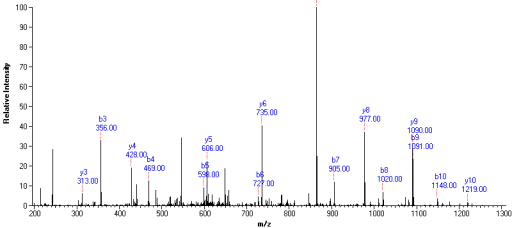

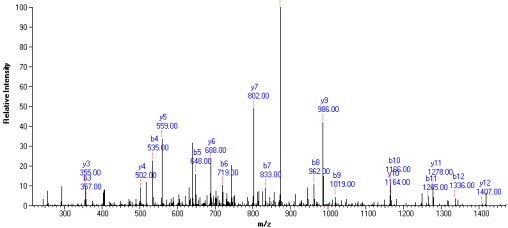

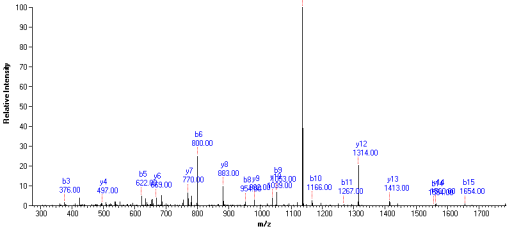

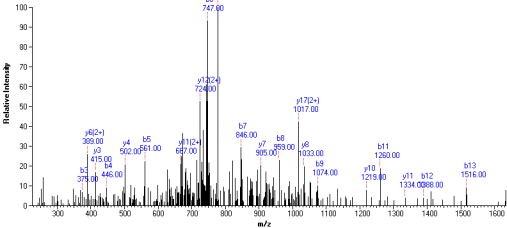

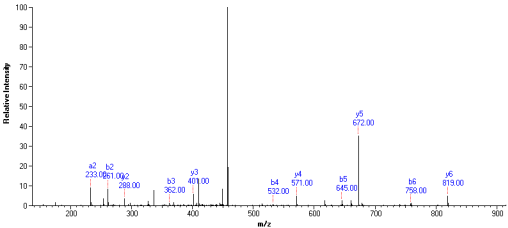

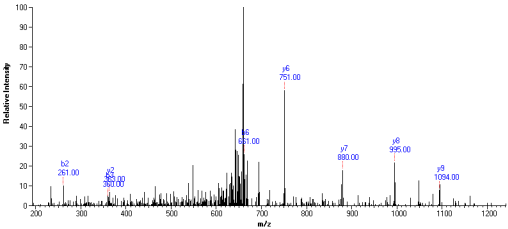

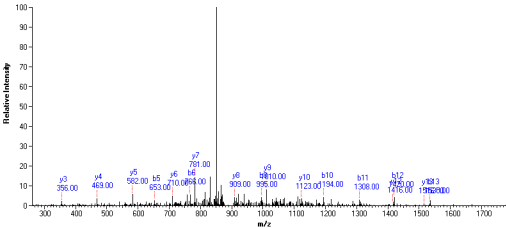



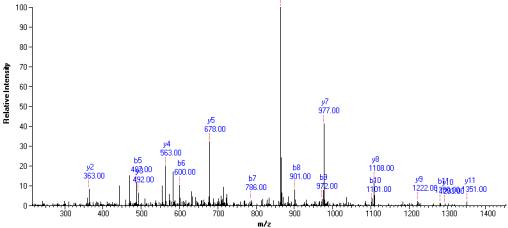

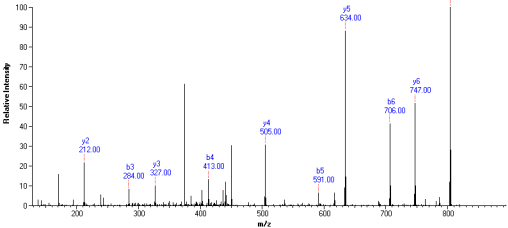

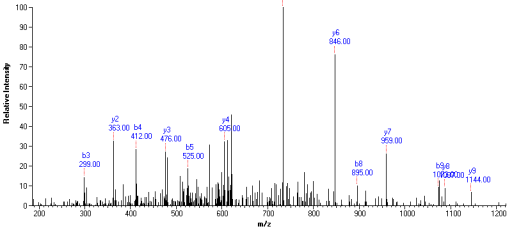

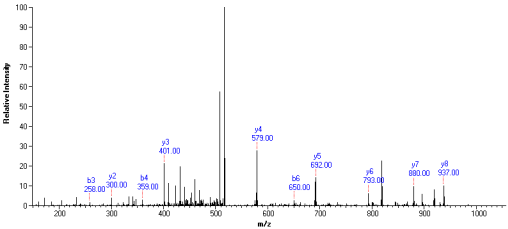

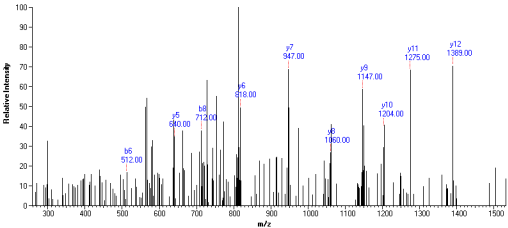

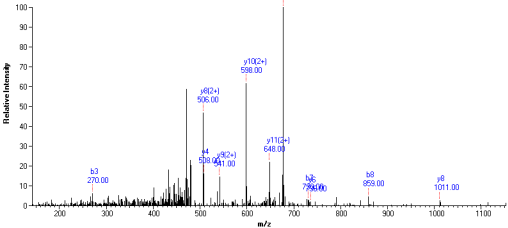

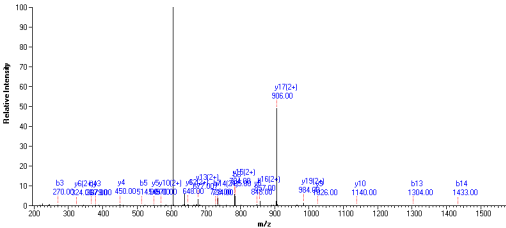

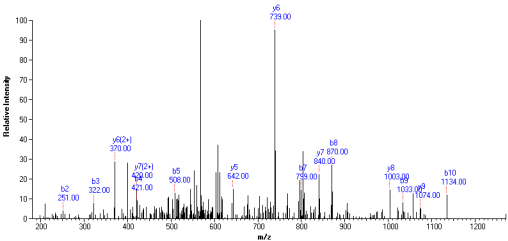



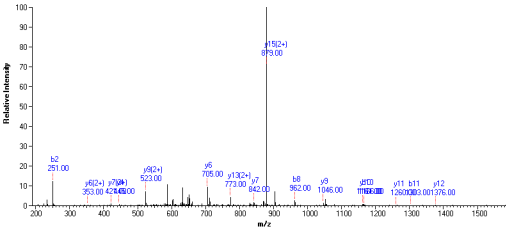

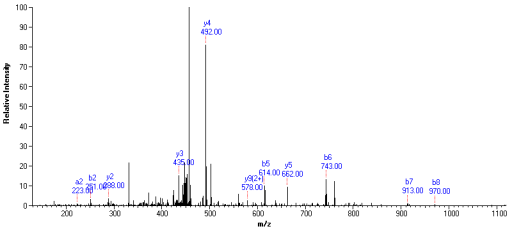

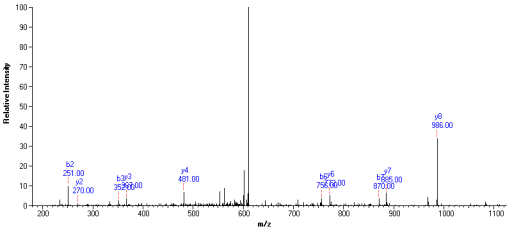

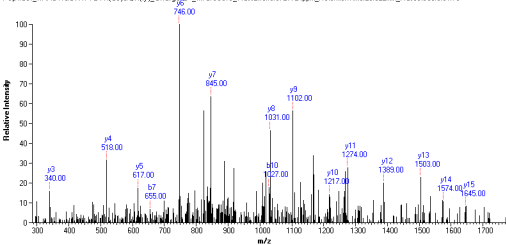

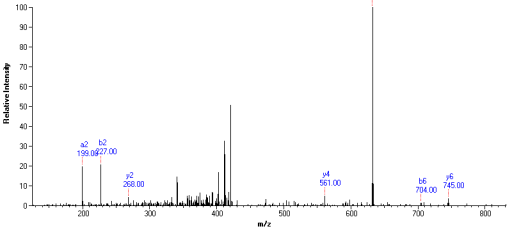

Relative Intensity

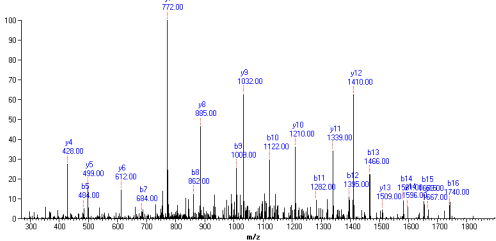

Peptide: \_IIAVIHSEK(ac)ER\_Charge: 2+\_m/z: 677.89\_MassError: 0.24319046ppm\_RetentionTime: 12.171min\_MascotScore: 59.5

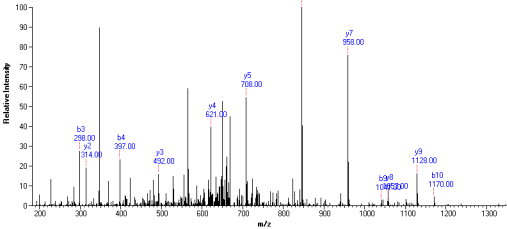

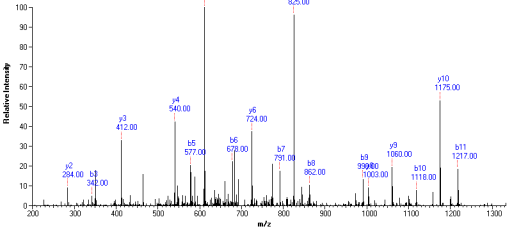



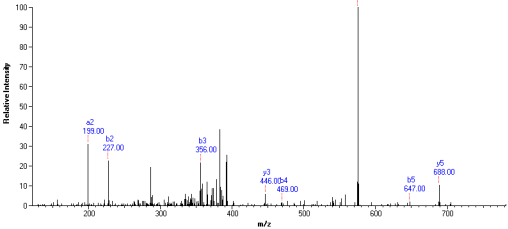

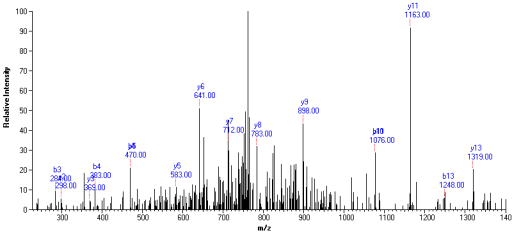

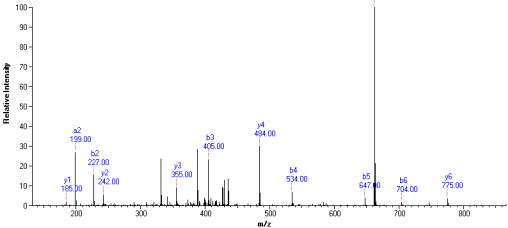

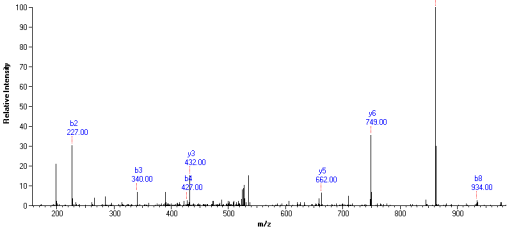

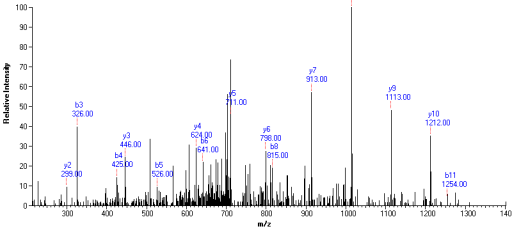

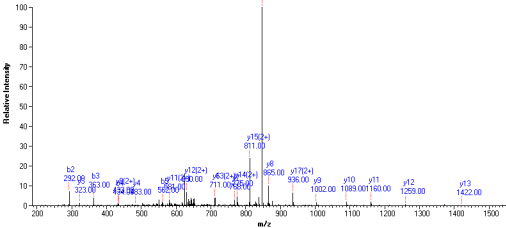

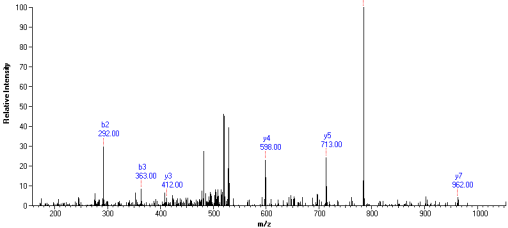

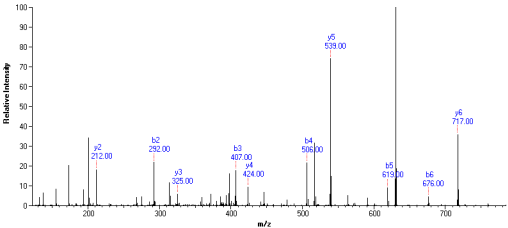



Peptide: **\_IK(ac)EELFYPSTNEEK(Iy)\_Charge:2+\_m/z:842.43\_MassError:3.4648837ppm\_RetentionTime:27.635min\_MascotScore:44.82**

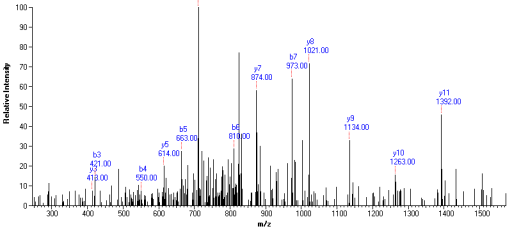

Peptide: \_IK(ac)ELAVK(Iy)\_Charge: 2+\_m/z: 429.79\_MassError: 1.3347053ppm\_RetentionTime: 12.183min\_MascotScore: 38.53

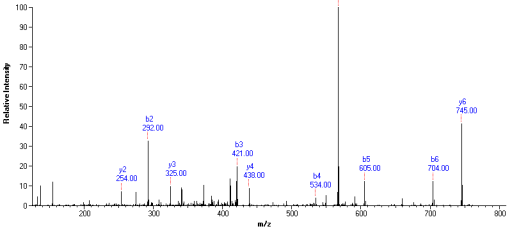

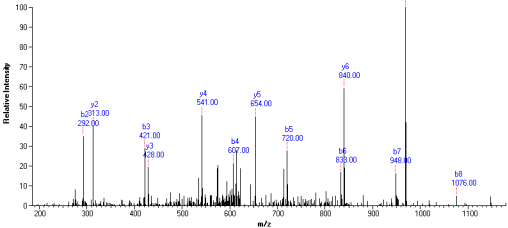

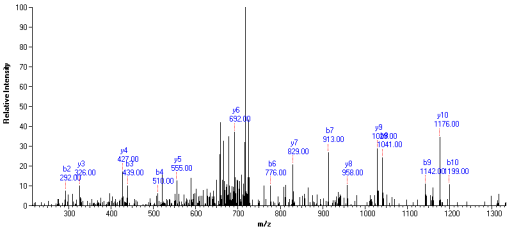

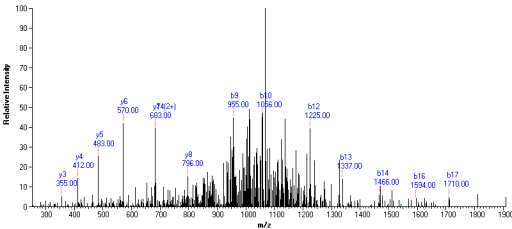

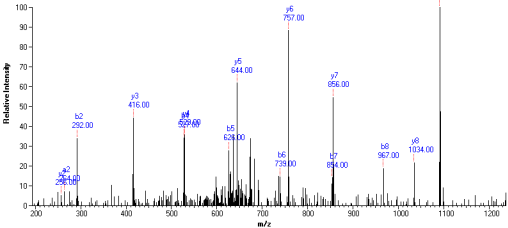

Peptide: \_IK(ac)GVVK(ac)K(Iy)\_Charge: 2+\_m/z: 440.31\_MassError: 0.58136821ppm\_RetentionTime: 9.1861min\_MascotScore: 27.55

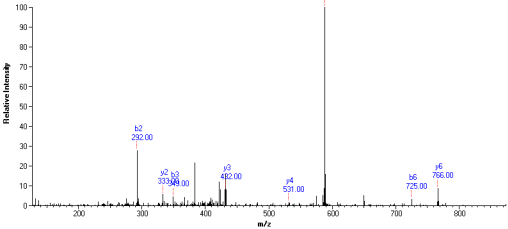

Peptide: \_IK(ac)K(ac)HPTPR\_Charge: 3+\_m/z: 362.89\_MassError: 1.4643959ppm\_RetentionTime: 9.4228min\_MascotScore: 21.55

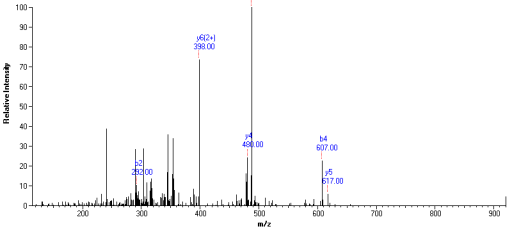



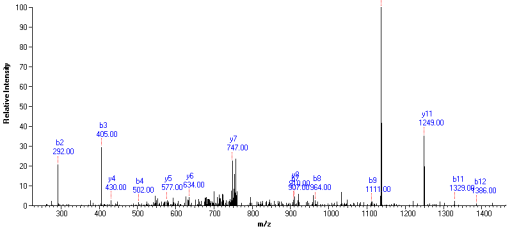

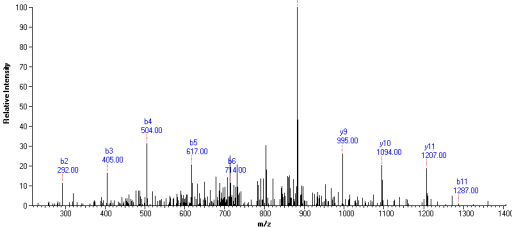

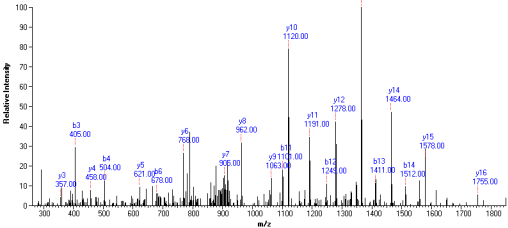

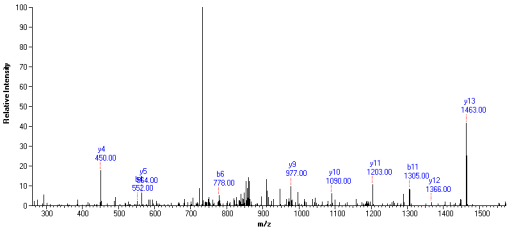

Peptide: \_IK(ac)YAMIGDPTGALTR\_Charge:2+\_m/z:833.95\_MassError:0.93127155ppm\_RetentionTime:34.74min\_MascotScore:55.89

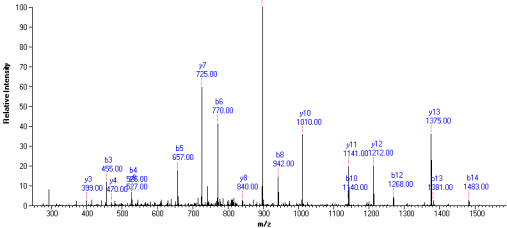

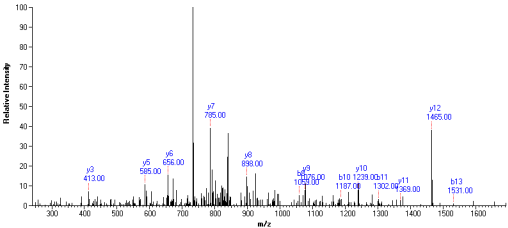

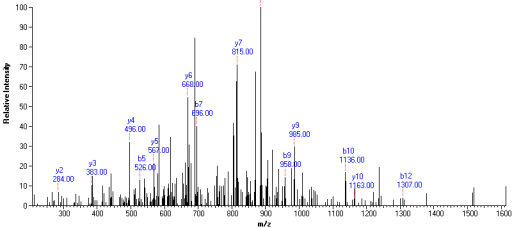

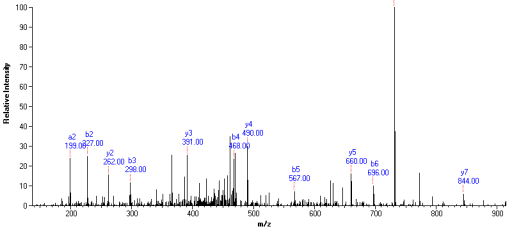



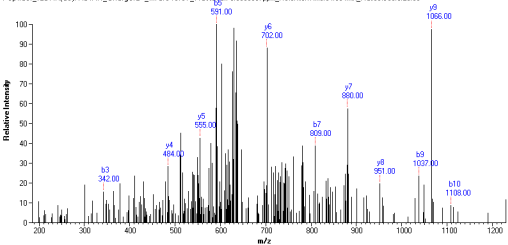

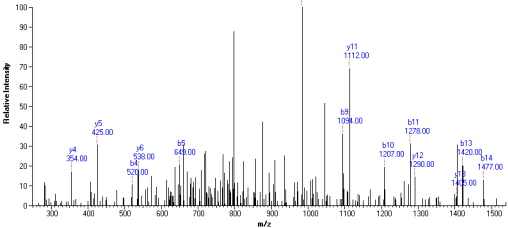

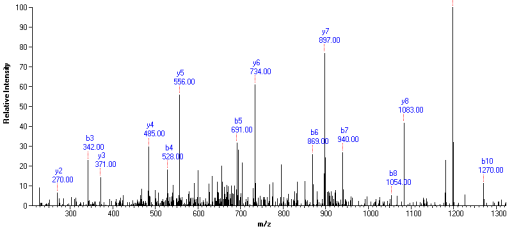

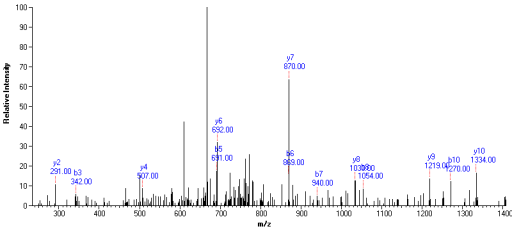

Peptide: \_ILENGEVK(ac)PLDVK(ly)\_ Charge: 2+ m/z: 756.44\_MassError:0.059121581ppm\_RetentionTime:27.178min\_MascotScore:50.32

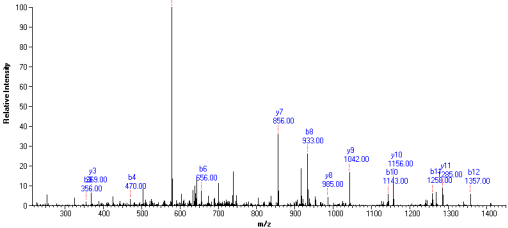

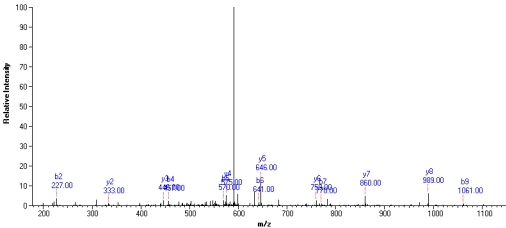

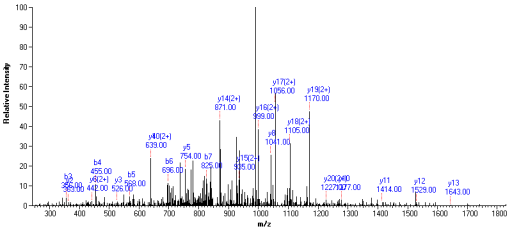

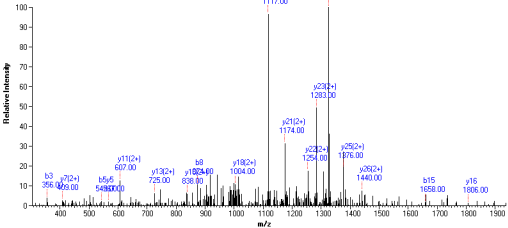



Peptide: \_ILFICGGAFAGLDK(ac)VISHR\_Charge:3+\_m/z:712.06\_MassError:4.8246395ppm\_RetentionTime:41.504min\_MascotScore:22.21

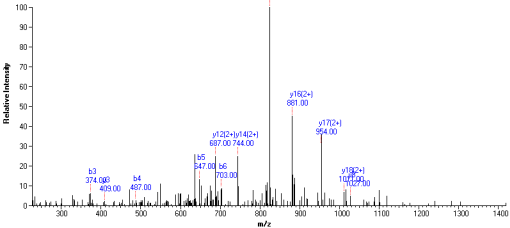

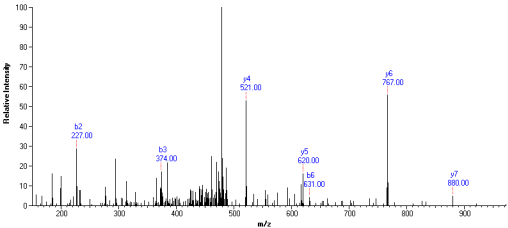

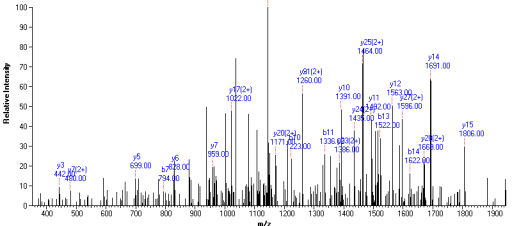

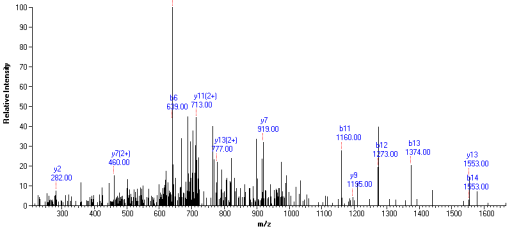

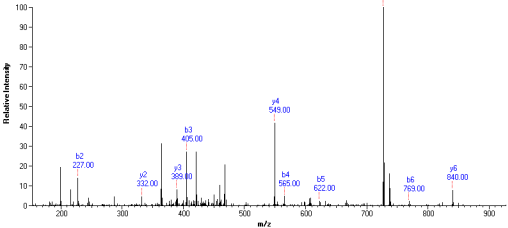

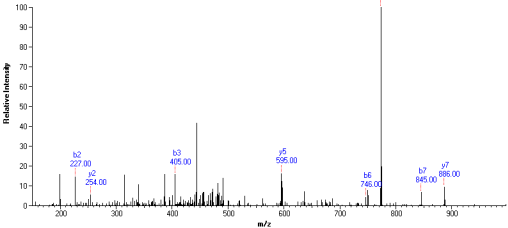

Peptide: \_ILK(ac)EGIEK(Iy)\_ Charge: 2+\_ m/z: 494.31\_MassError:0.96441267ppm\_RetentionTime:12.169min\_MascotScore:39.42

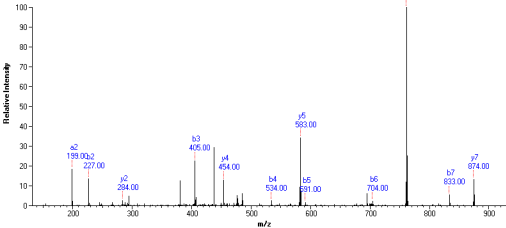

Peptide: \_ILK(ac)GNDDR\_Charge:2+\_m/z: 495.77\_MassError:1.5867587ppm\_RetentionTime:11.408min\_MascotScore:27.92

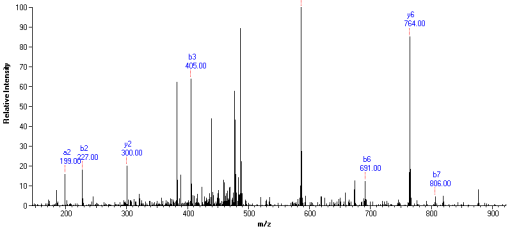



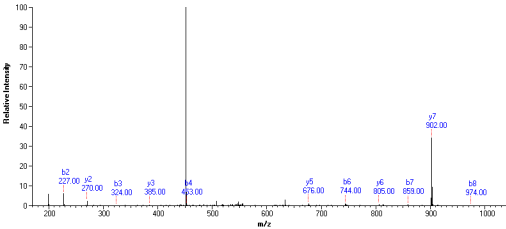

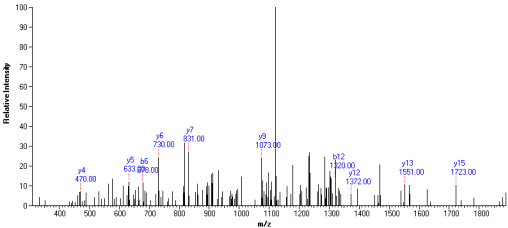

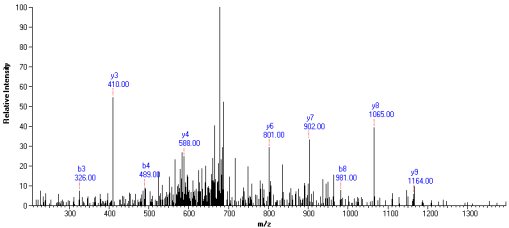

Peptide: \_ILYQEK(ac)DPK(Iy)\_Charge:2+\_m/z: 596.33\_MassError:-0.11812488ppm\_RetentionTime:12.421min\_MascotScore:24.73

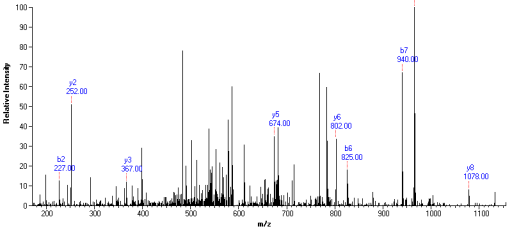

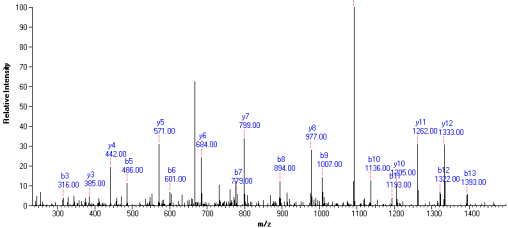

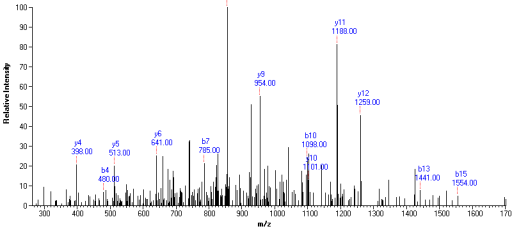

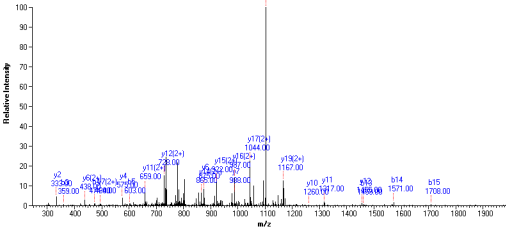

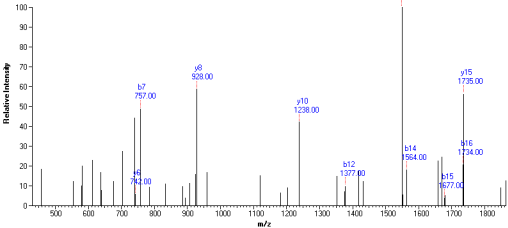



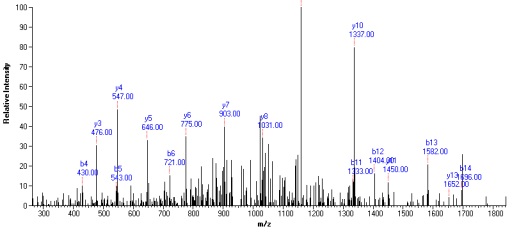

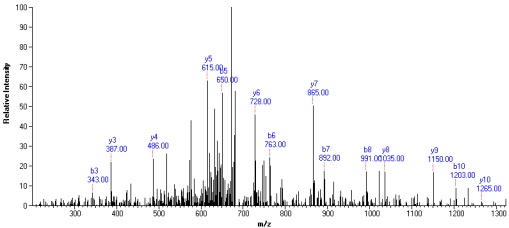

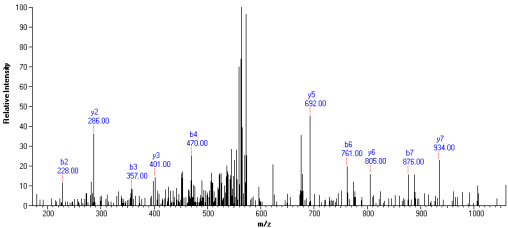

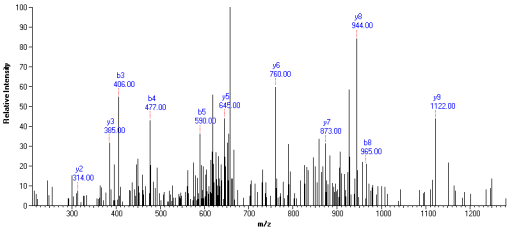

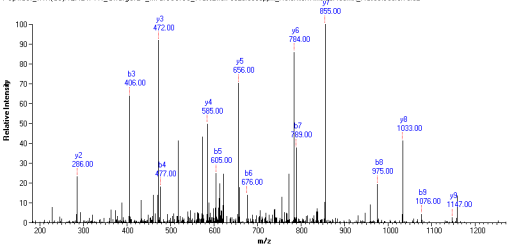

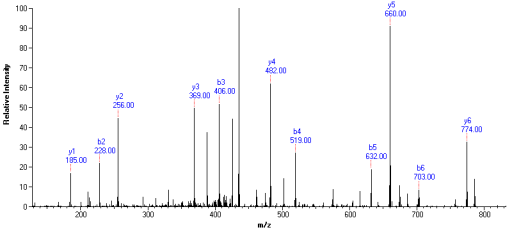

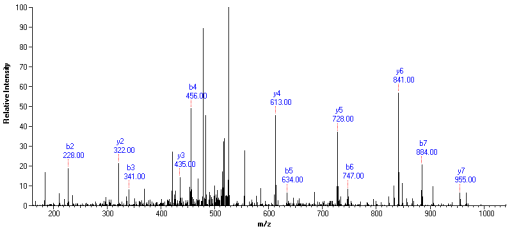

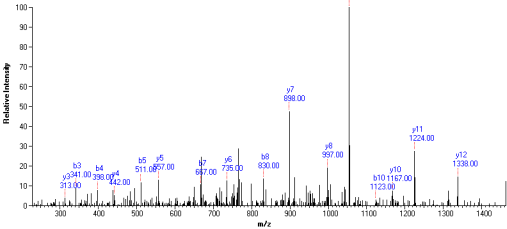



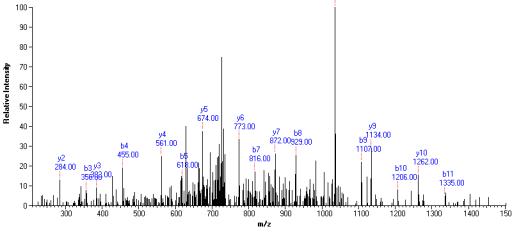

Peptide: \_INSNEELALPK(ac)EK(Iy)\_Charge: 2+\_m/z: 771.92\_MassError: -1.6466364ppm\_RetentionTime: 24.935min\_MascotScore: 30.4

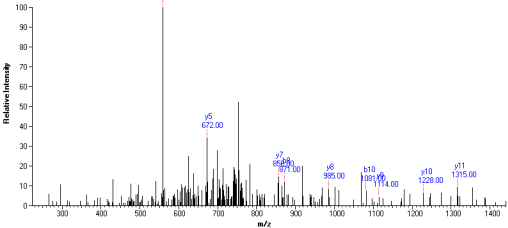

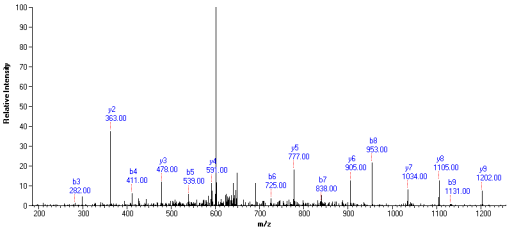

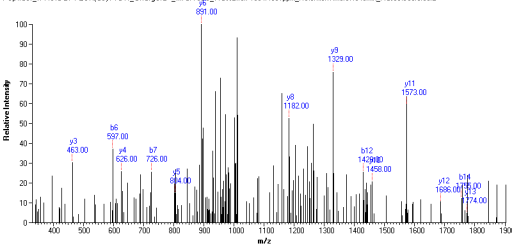

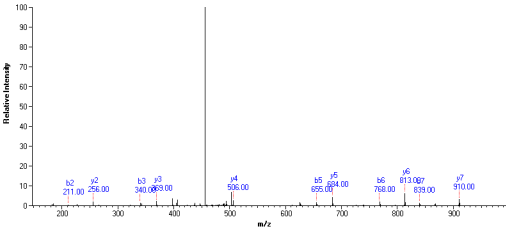

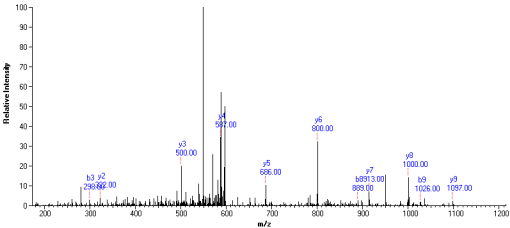

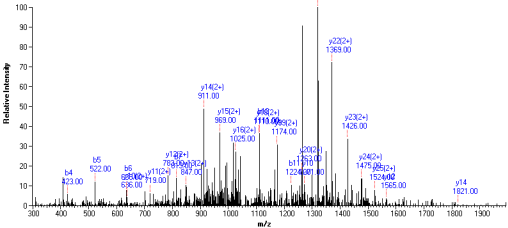

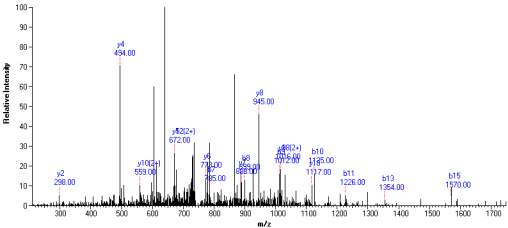



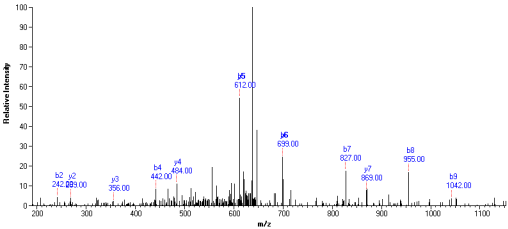

Peptide: IQAIIEDIK(ac)ER\_Charge: 2+\_m/z: 694.4\_MassError: -0.79400303ppm\_RetentionTime: 27.651min\_MascotScore: 26.09

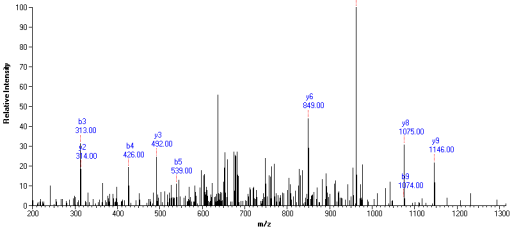

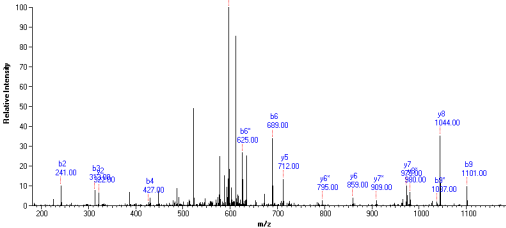

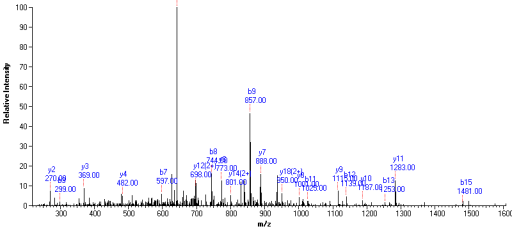

Peptide: IQK(ac)ISGANLSR\_Charge:2+\_m/z: 623.87\_MassError:1.159256ppm\_RetentionTime:14.414min\_MascotScore:54.04

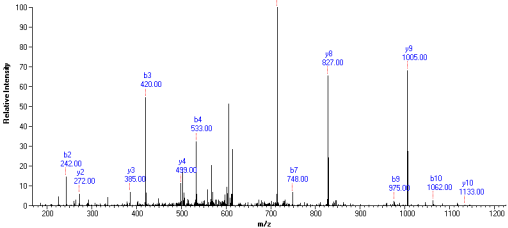

Peptide: IQK(ac)LGLQIK(y) Charge: 2+ m/z: 549.86 MassError: 0.074083847ppm RetentionTime: 22.429min MascotScore: 47.14

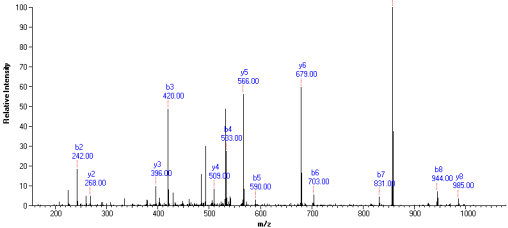

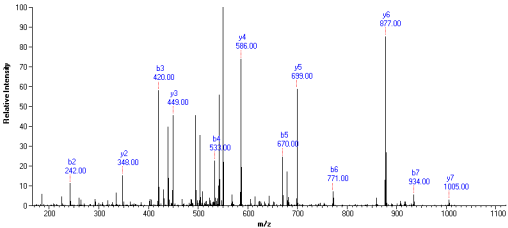

Peptide: **IQLVGD<sup>2</sup>LFVTNTK**[ac]ILK[ly]  
Charge: 2+  
m/z: 988.08  
MassError: 3.0494335ppm  
RetentionTime: 45.81min  
MascotScore: 87.02

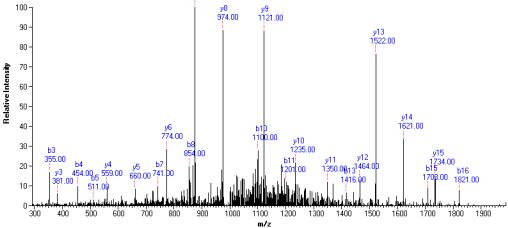



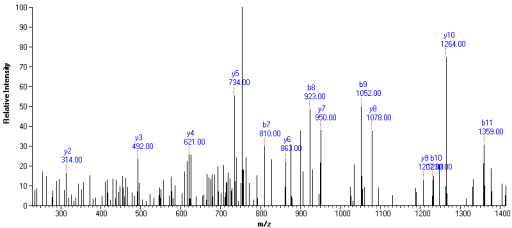

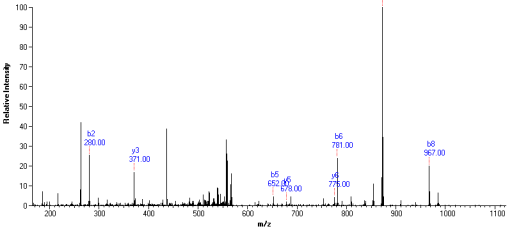

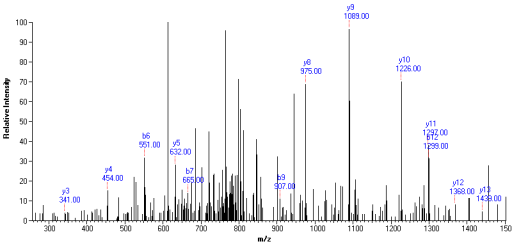

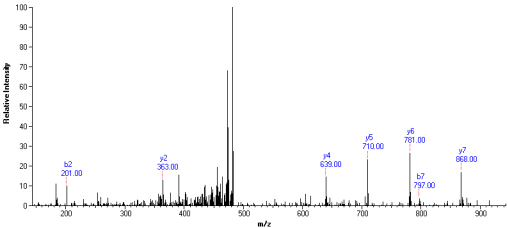

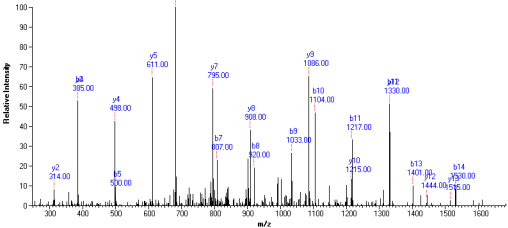

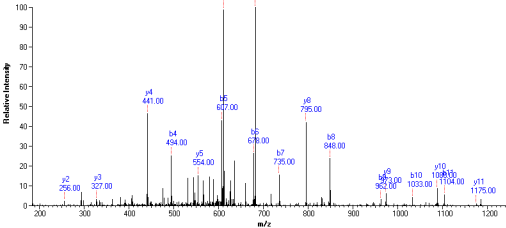

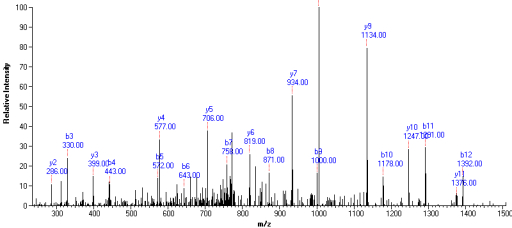

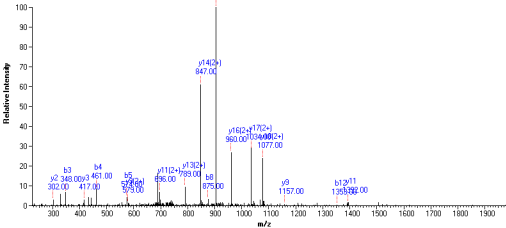



Peptide: \_ISGAGIQESHVHDVTITK[ac]ESPNYR\_Charge: 3+\_m/z: 900.46\_MassError:1.9075714ppm\_RetentionTime:18.82min\_MascotScore:78.14

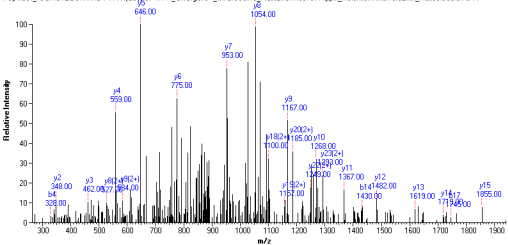

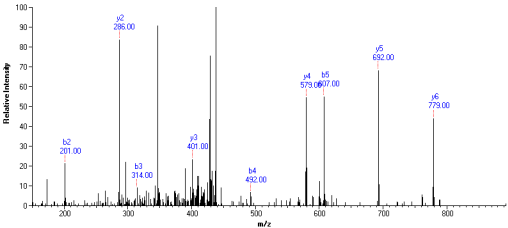

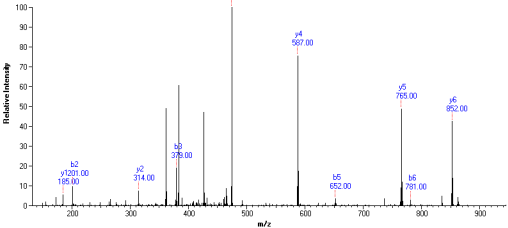

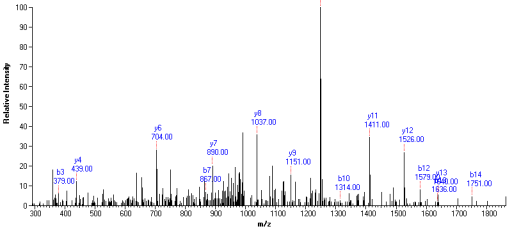

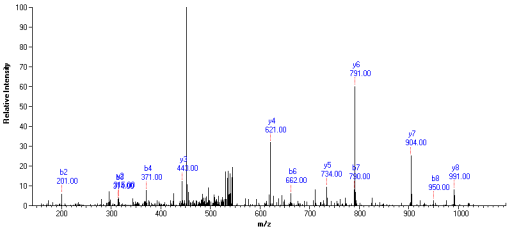

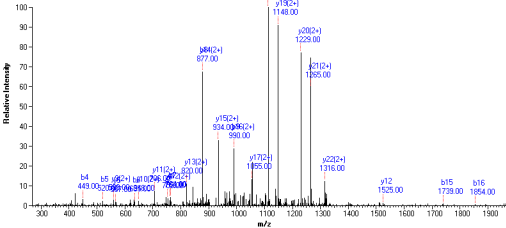

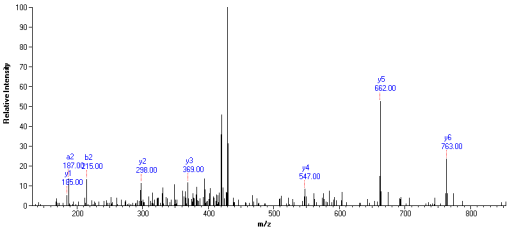

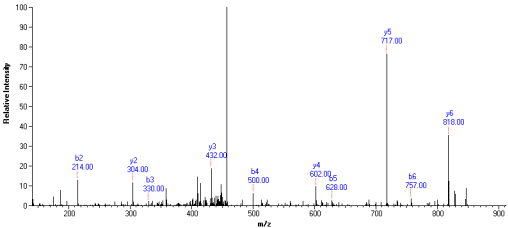



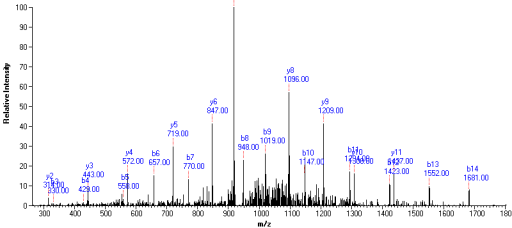

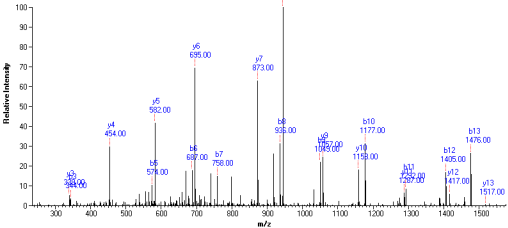

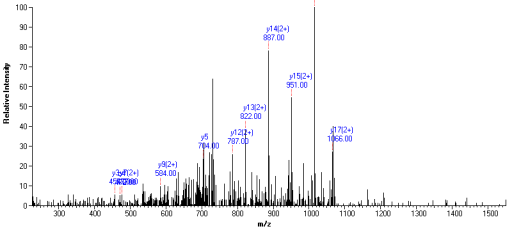

Peptide: \_ITEYEK(ac)DANGELVAK(y)\_Charge: 2+\_m/z: 869.45\_MassErr: 1.6716112ppm\_RetentionTime: 19.113min\_MascotScore: 74.4

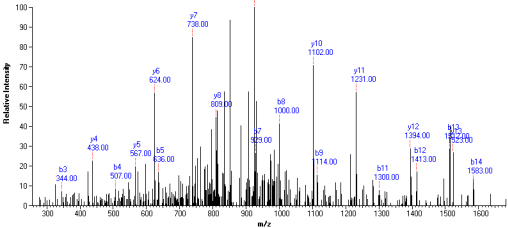

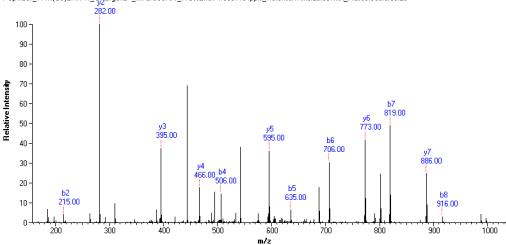

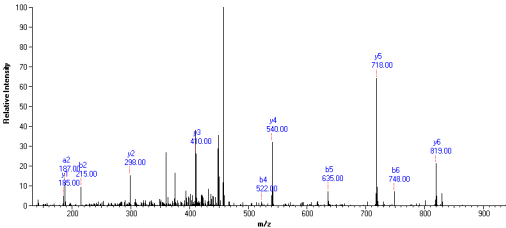

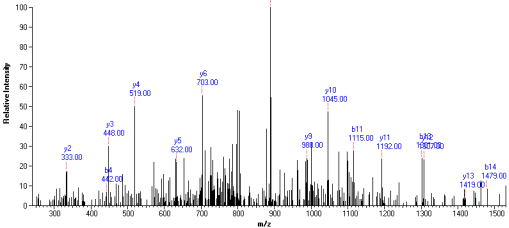

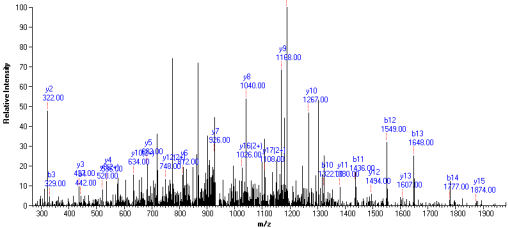



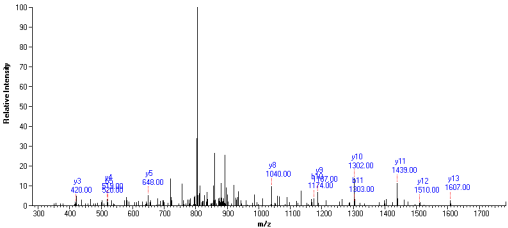

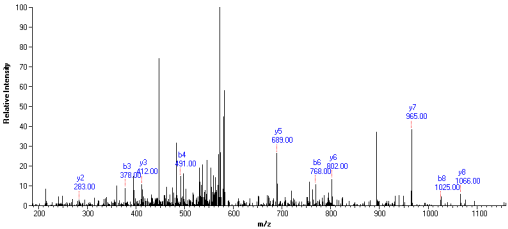

Peptide: \_IVCTIGPK(ac)TESEEMLAK(y)\_ Charge: 2+\_ m/z: 982.51\_MassError: 2.3196123ppm\_RetentionTime: 31.22min\_MascotScore: 84.14

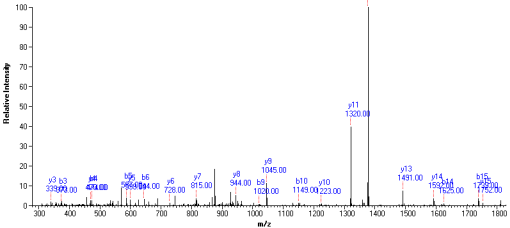

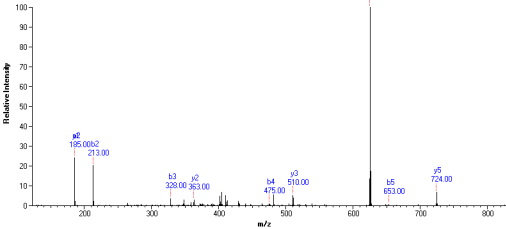

Peptide: \_IVDIDK(ac)K(Iy)\_Charge:2+\_m/z:444.77\_MassError:2.6651543ppm\_RetentionTime:11.083min\_MascotScore:22.67

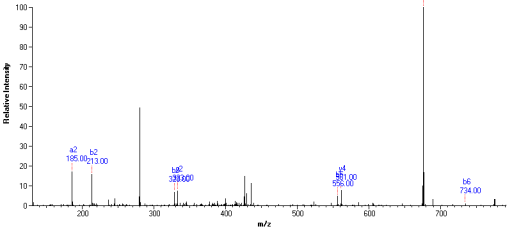

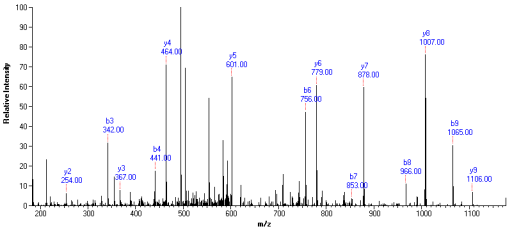

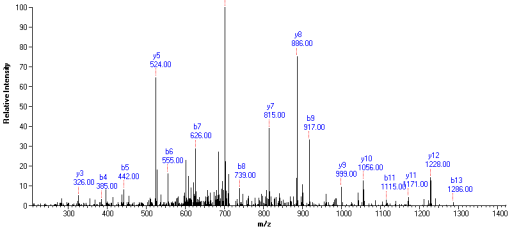

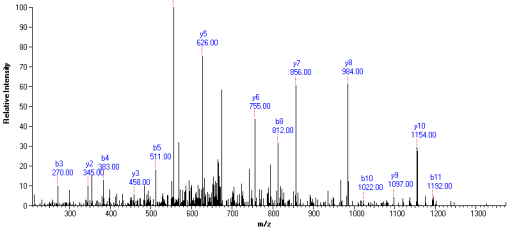



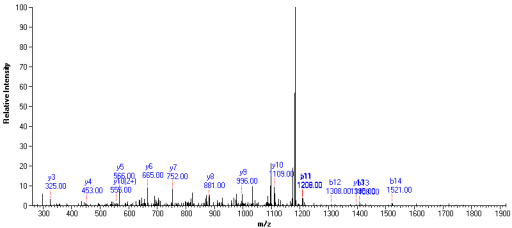

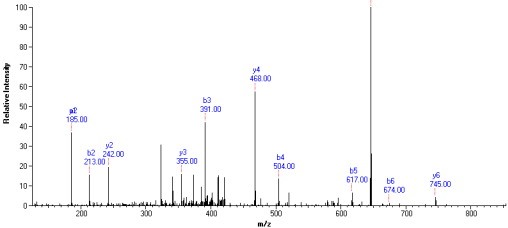

Peptide: \_IVK(ac)M(ox)IK(Iy)\_Charge: 2+\_m/z: 403.26\_MassError: 2.5504448ppm\_RetentionTime: 12.275min\_MascotScore: 22.52

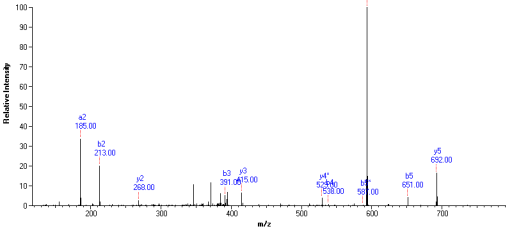

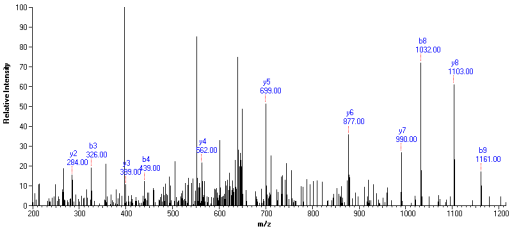

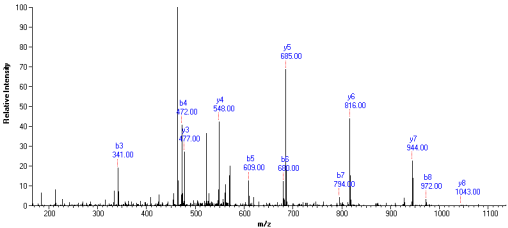

Relative Intensity

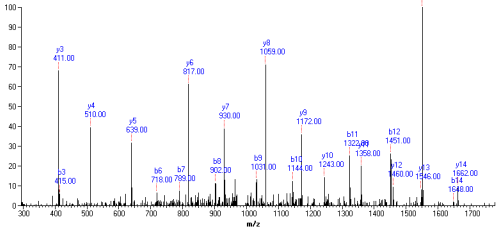

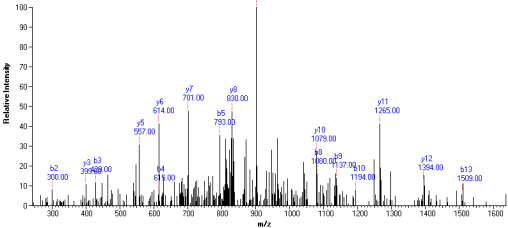

Peptide: \_FYAAFK(ac)K(Iy)\_Charge: 2+\_m/z: 449.77\_MassError: 1.5145292ppm\_RetentionTime: 14.582min\_MascotScore: 30.09

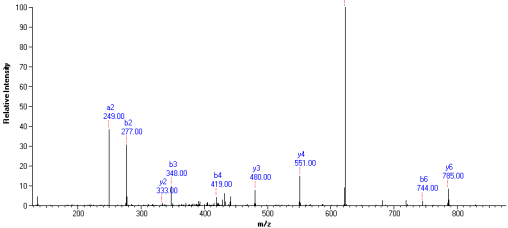



Peptide: **\_IYGITAK(ac)ER**\_Charge: 2+\_m/z: 555.82\_MassError: 0.062862873ppm\_RetentionTime: 20.548min\_MascotScore: 29.12

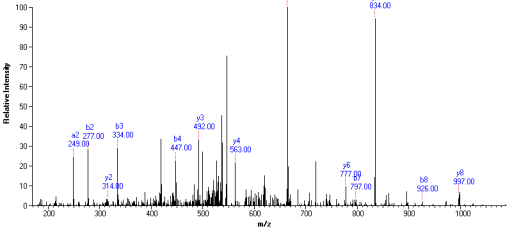

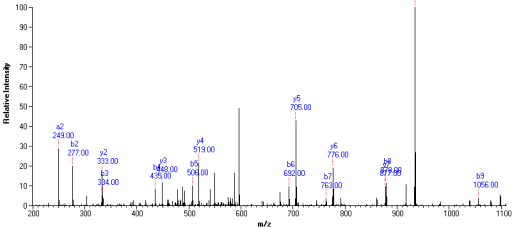

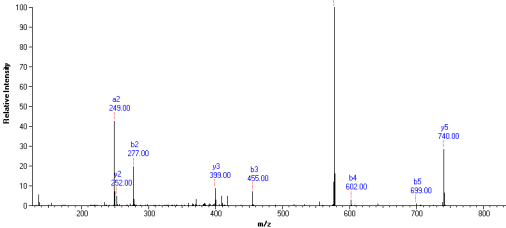

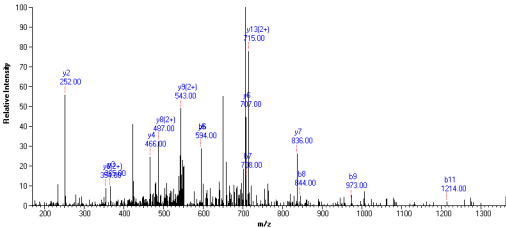

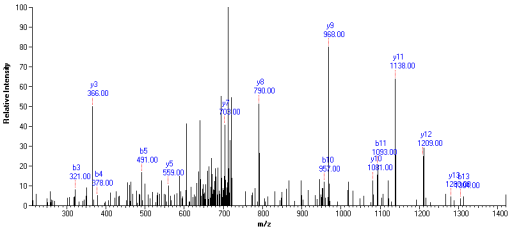

Peptide: **K(ac)AEDTLALLR**\_Charge: 2+\_m/z: 586.34\_MassError: 0.69124684ppm\_RetentionTime: 25.349min\_MascotScore: 60.93

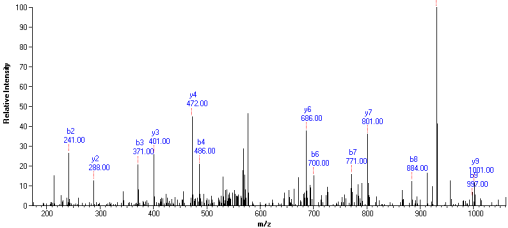

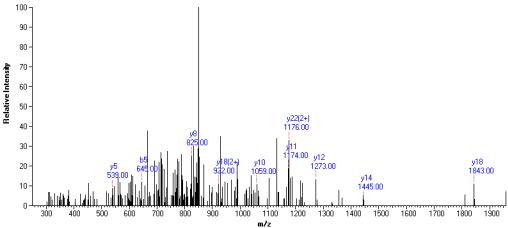

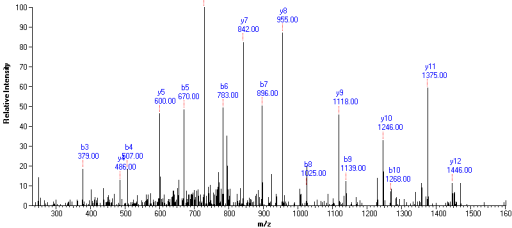



Peptide: \_K(ac)AGFYTR\_Charge: 2+\_m/z: 419.75\_MassError: 2.4973849ppm\_RetentionTime: 13.208min\_MascotScore: 51.03

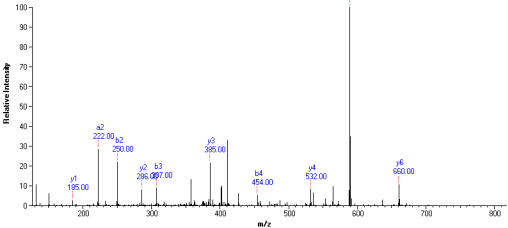

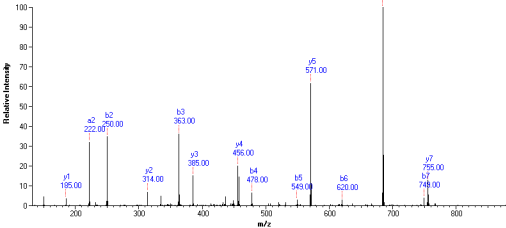

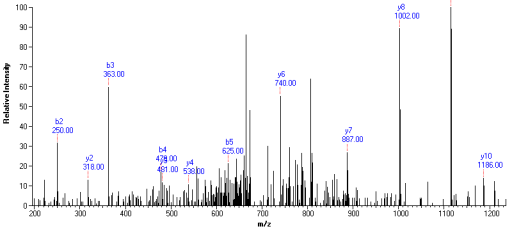

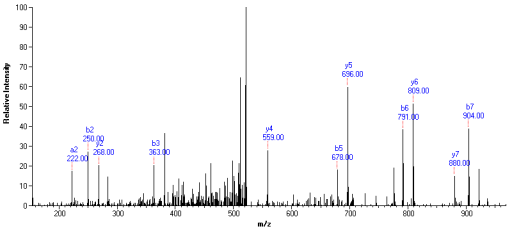

Peptide: **K(ac)AK(ac)ITLYDR**\_Charge: 2+\_m/z: 577.36\_MassError: -0.025031412ppm\_RetentionTime: 19.279min\_MascotScore: 49.77

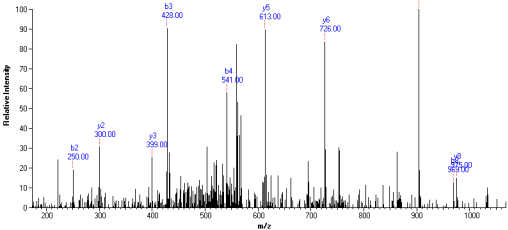

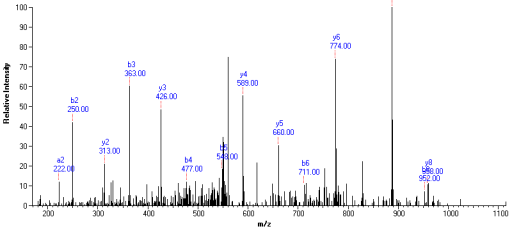

Peptide: **K(ac)ANIYK(ly)\_Charge: 2+\_m/z: 397.74\_MassError: 2.4696574ppm\_RetentionTime: 7.2073min\_MascotScore: 28.84**

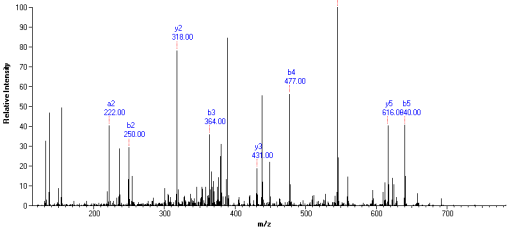

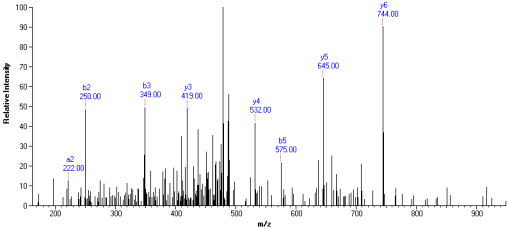



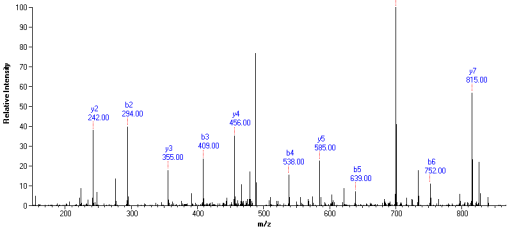

Peptide: **\_K(ac)DDFSR**\_Charge: 2+\_m/z: 414.2\_MassError: 0.78285249ppm\_RetentionTime: 10.569min\_MascotScore: 28.73

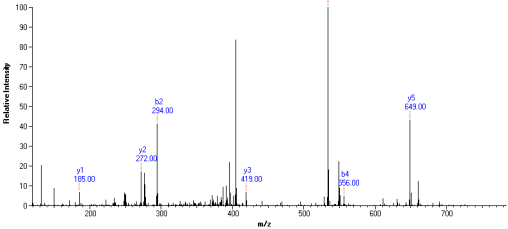

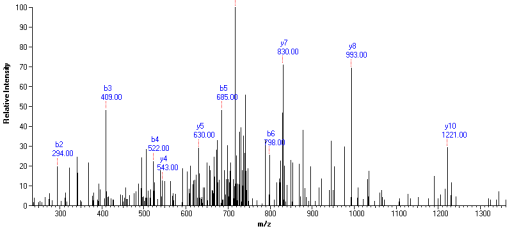

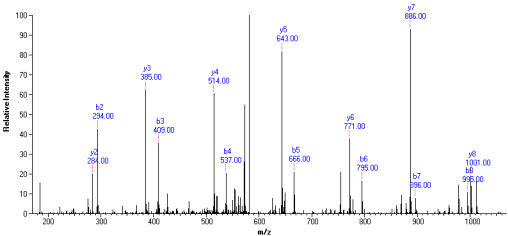

Peptide: **K(ac)DE**DGN**Y**LVD**V**ILDE**A**A**NK**(ly)\_ Charge: 3+ m/z: 727.03\_MassError: 0.44261857ppm\_RetentionTime: 50.473min\_MascotScore: 31

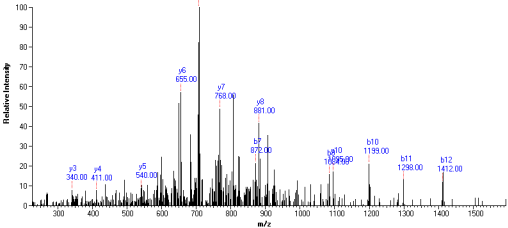

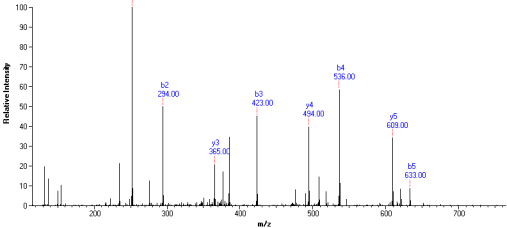

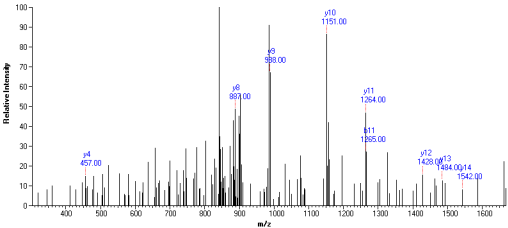

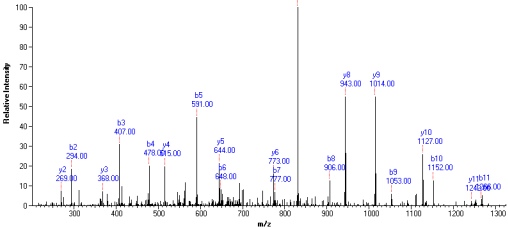



Relative Intensity

100  
90  
80  
70  
60  
50  
40  
30  
20  
10  
0

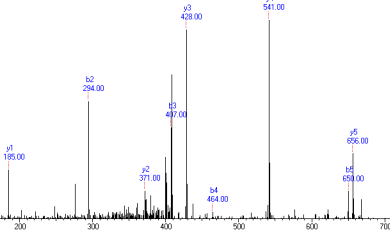

m/z

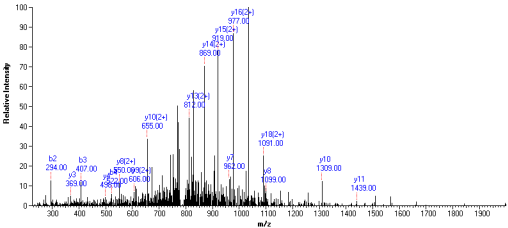

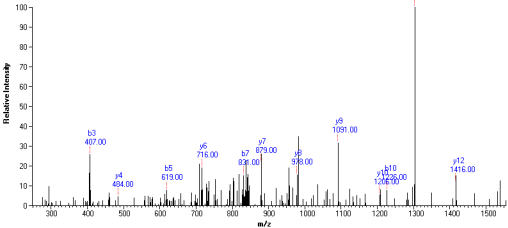

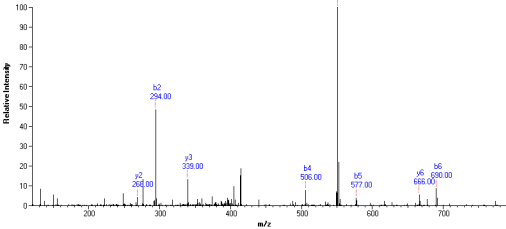

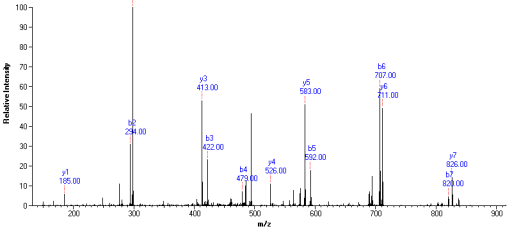

Peptide: **K(ac)DVDVWHPDVR**\_Charge: 2\_  $m/z$ : 713.37\_MassError: 2.0465979ppm\_RetentionTime: 24.539min\_MascotScore: 54.17

Relative Intensity

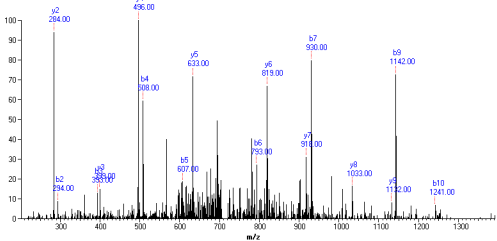

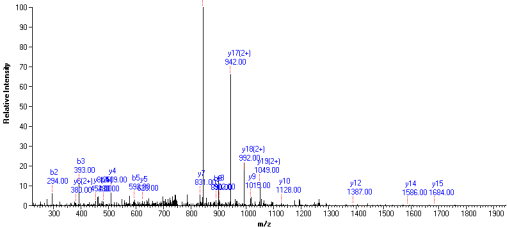

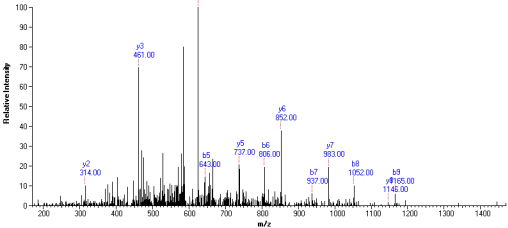



Peptide: **K(ac)EGDSIGAK**(ly)\_Charge: 2+\_m/z: 481.76\_MassError: 1.5845802ppm\_RetentionTime: 6.868min\_MascotScore: 21.42

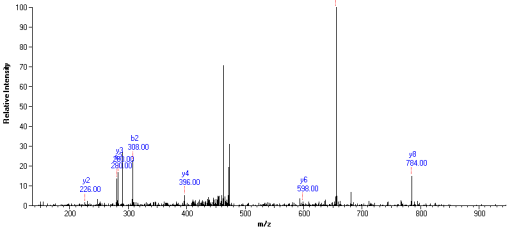

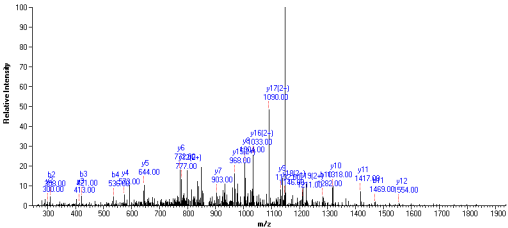

Peptide: **K(ac)EIEIYK**(ly)\_Charge: 2+\_m/z: 490.79\_MassError: 1.9913649ppm\_RetentionTime: 16.446min\_MascotScore: 40.33

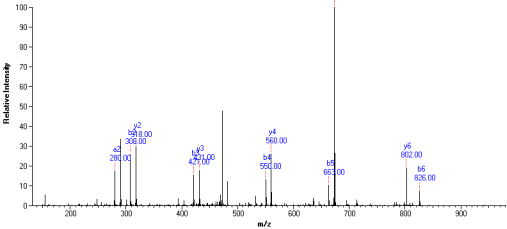

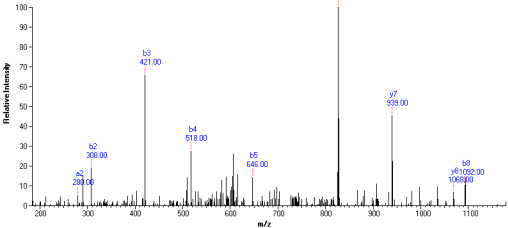

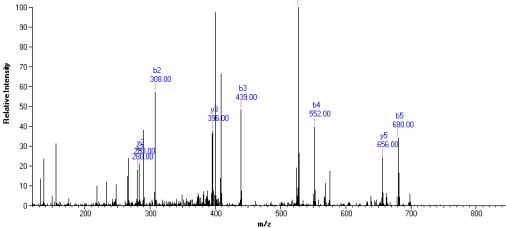

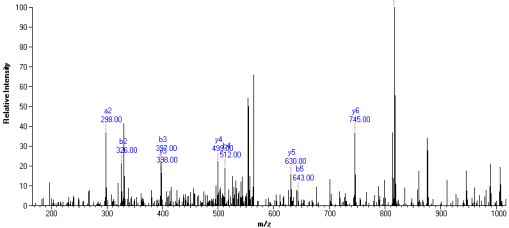

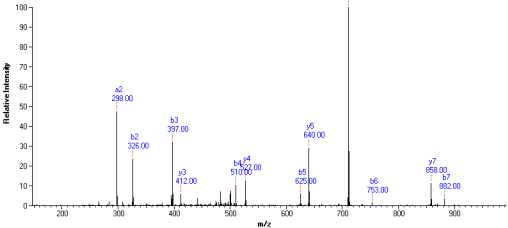

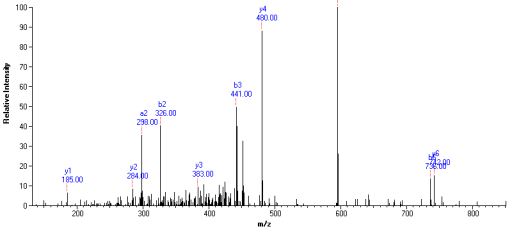



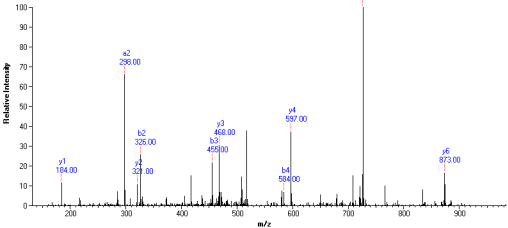

Peptide: **K(ac)FEELVQTR**\_Charge: 2+\_m/z: 605.33\_MassError: -0.2967405ppm\_RetentionTime: 19.389min\_MascotScore: 51.65

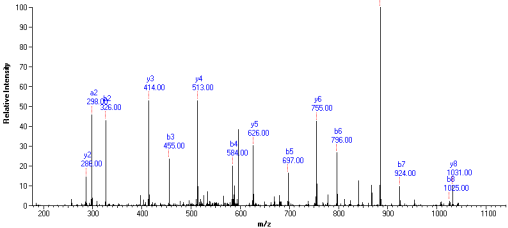

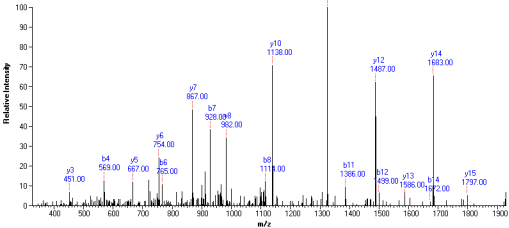

Peptide: **K(ac)FGLSR**\_Charge: 2+\_m/z: 384.23\_MassError: 3.9210929ppm\_RetentionTime: 17.76min\_MascotScore: 31.32

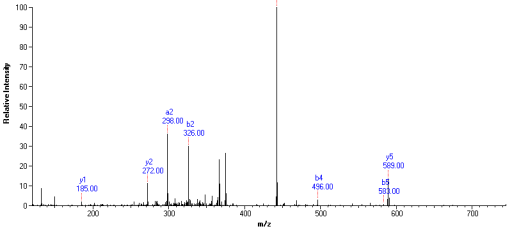

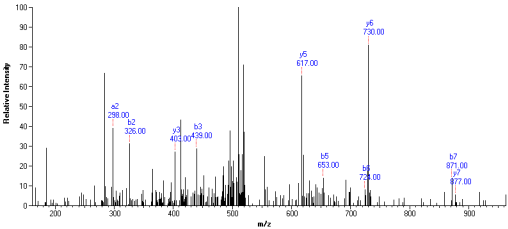

Peptide: **K(ac)FNLMLETK**(ly)\_Charge:2+\_m/z:591.33\_MassError:2.1749419ppm\_RetentionTime:27.09min\_MascotScore:51.86

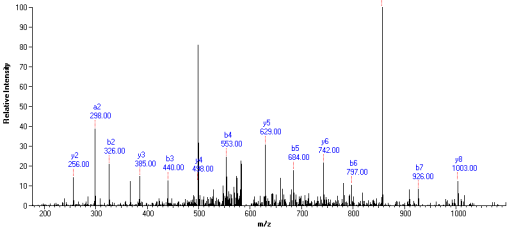

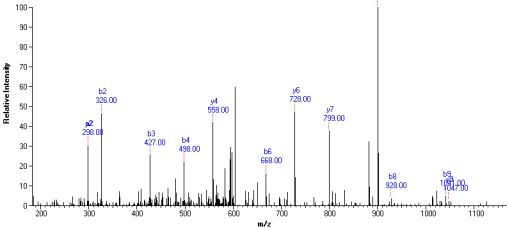

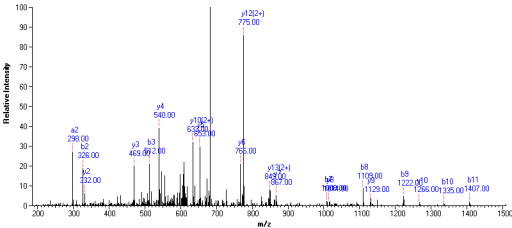



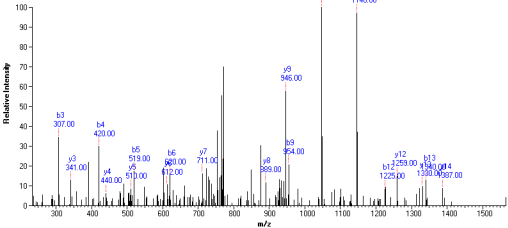

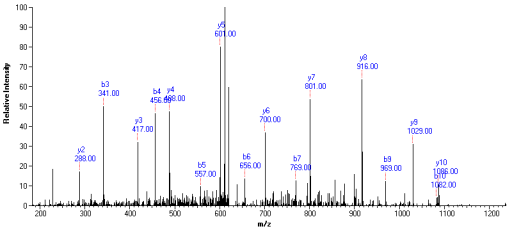

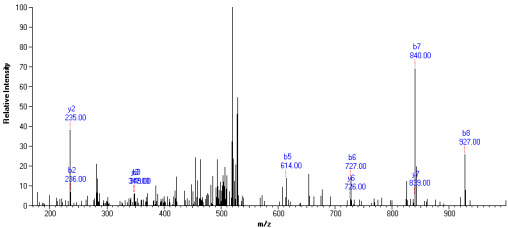

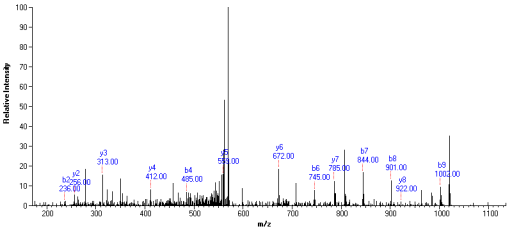

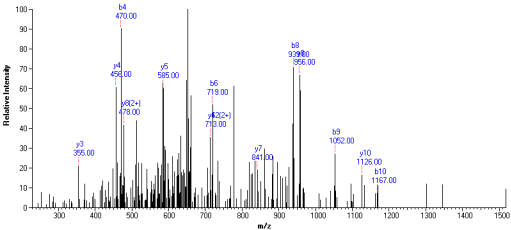

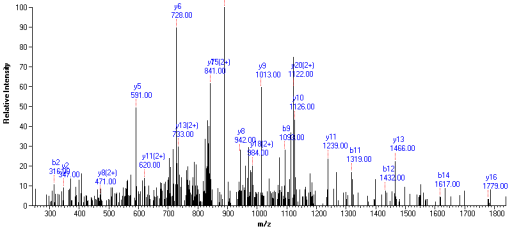

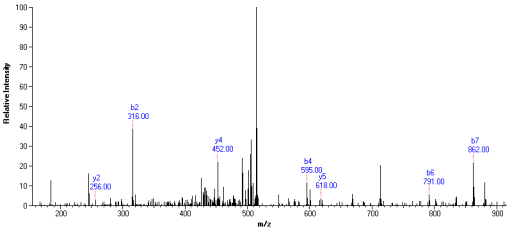

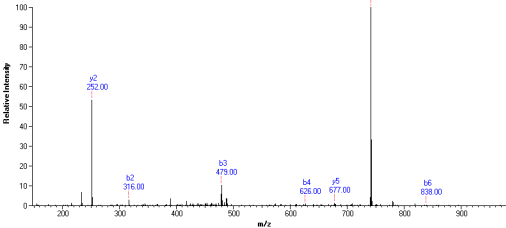



Peptide: **K(ac)IAEK(ac)R** Charge: 2+ m/z: 428.24 MassError: 1.7310047ppm RetentionTime: 10.234min MascotScore: 21.11

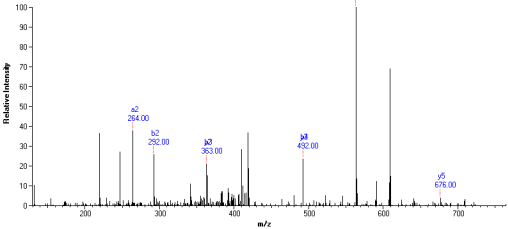

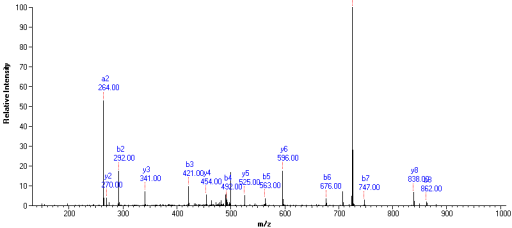

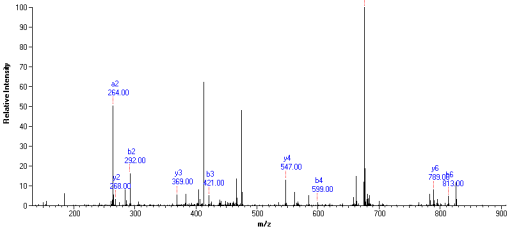

Peptide: **K(ac)IFALPVIEQISPVLSR**\_Charge: 3+\_m/z: 657.4\_MassError: 3.3355617ppm\_RetentionTime: 50.492min\_MascotScore: 30.48

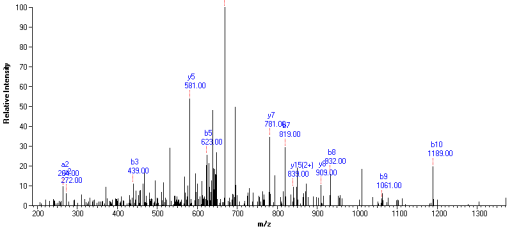

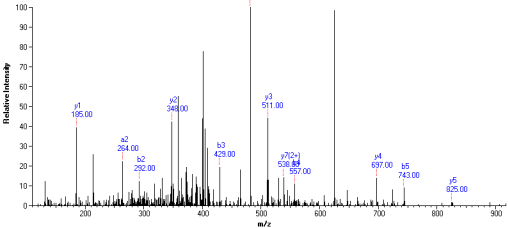

Peptide: **K(ac)IIELK(Iy)**\_Charge: 2+\_m/z: 401.27\_MassError: 0.75987718ppm\_RetentionTime: 20.451min\_MascotScore: 25.15

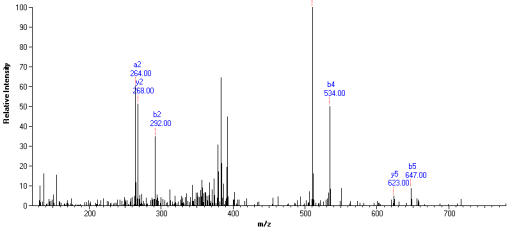

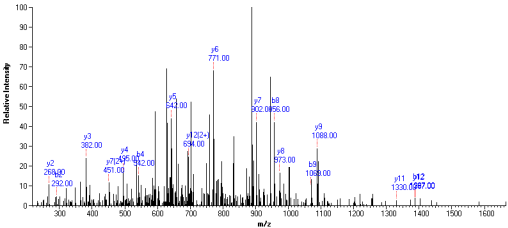

Peptide: \_K(ac)IIIGK(Iy)\_Charge: 2+\_m/z: 365.26\_MassError: 1.0125834ppm\_RetentionTime: 13.987min\_MascotScore: 32.83

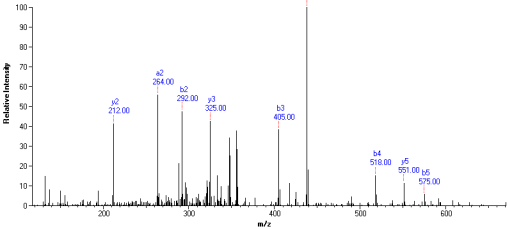



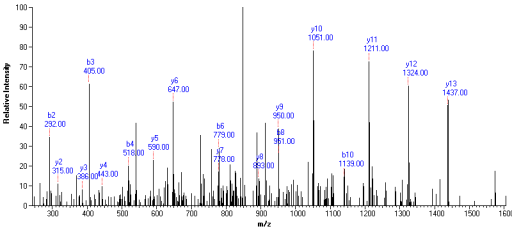

Peptide: **K(ac)IIVDTYGGMAR**\_Charge: 2+\_m/z: 692.38\_MassError: 4.3085432ppm\_RetentionTime: 22.489min\_MassotScore: 34.13

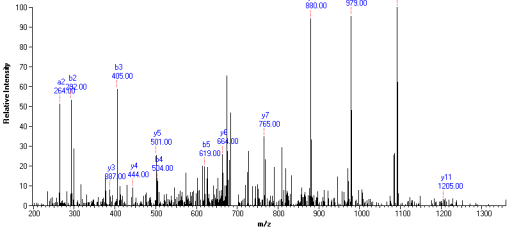

Peptide: **K(ac)ISNIR**\_Charge:2+\_m/z:395.75\_MassError:1.1292416ppm\_RetentionTime:10.27min\_MascotScore:33.54

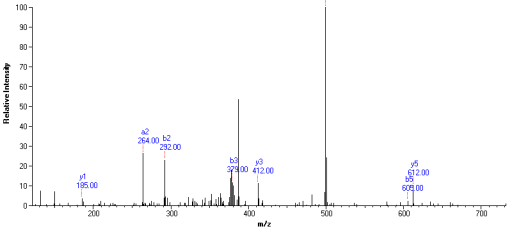

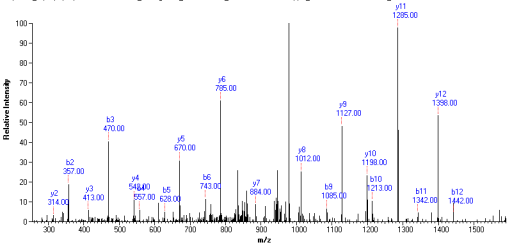

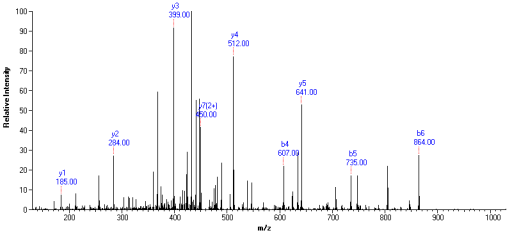

Peptide: **K(ac)LADSGLNIIAAK**(ly)\_Charge:2+\_m/z:686.41\_MassError:1.921088ppm\_RetentionTime:30.654min\_MascotScore:41.04

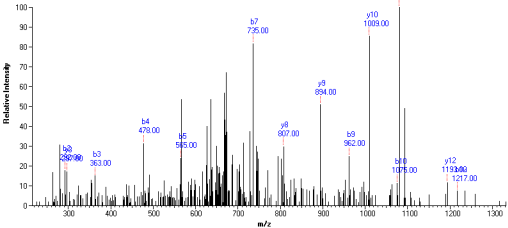

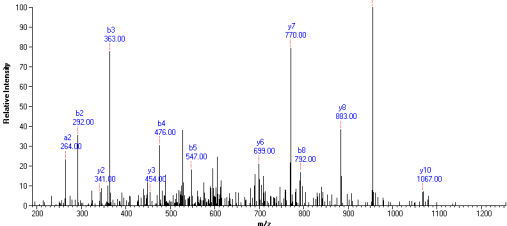

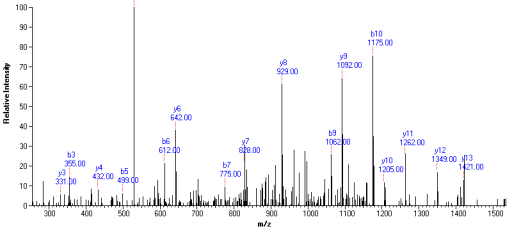



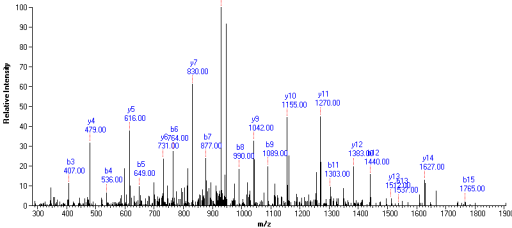

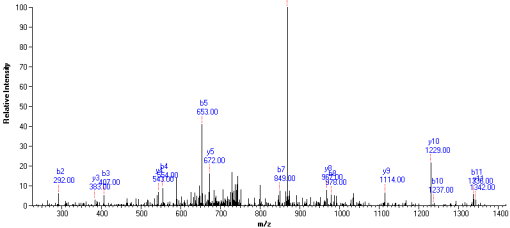

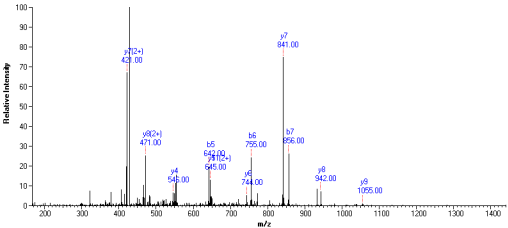

Peptide: **K(ac)LEDLLAAK**(ly)\_Charge: 2+\_m/z: 529.82\_MassError: -1.477163ppm\_RetentionTime: 29.273min\_MascotScore: 25.6

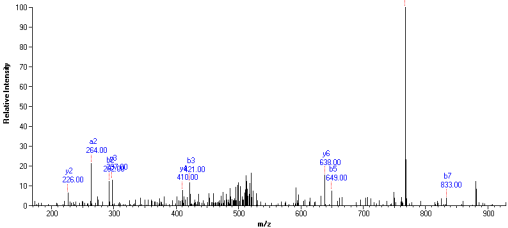

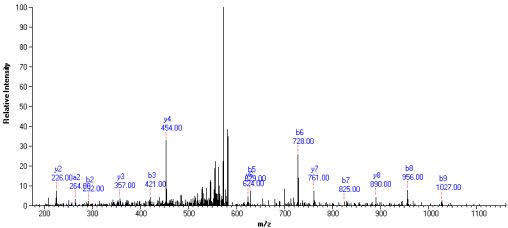

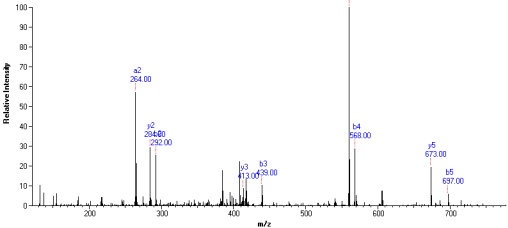

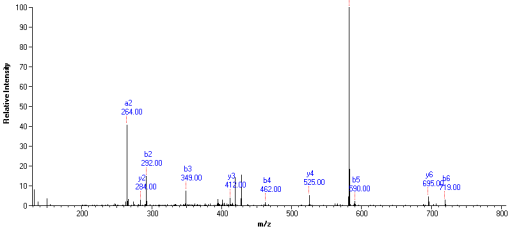

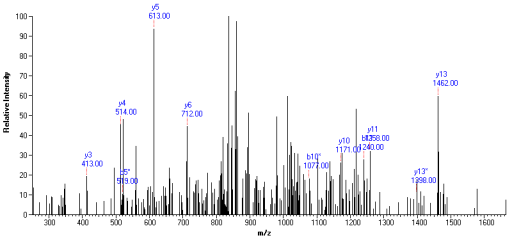



Peptide: **K(ac)LGMAPR**\_Charge: 2+\_m/z: 416.75\_MassError: 1.545908ppm\_RetentionTime: 9.6724min\_MascotScore: 38.74

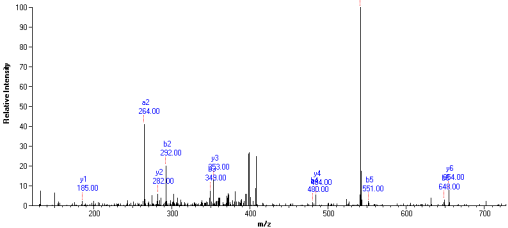

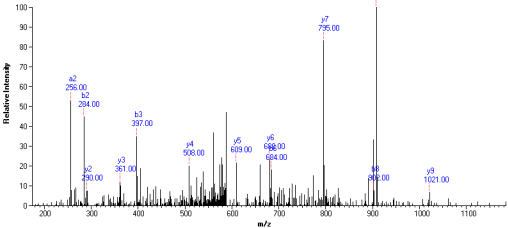

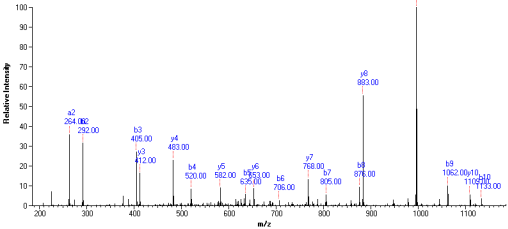

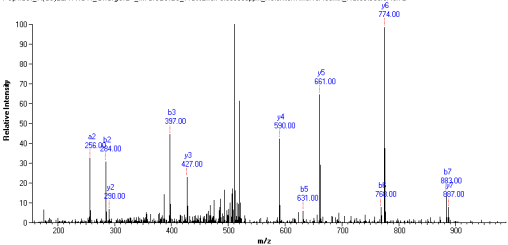

Peptide: **K(ac)LLDEGR** Charge: 2+ m/z: 445.76 MassError: 1.4025ppm RetentionTime: 11.698min MascotScore: 43.7

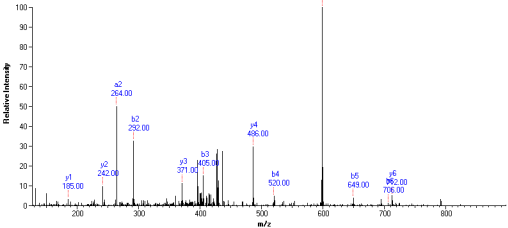

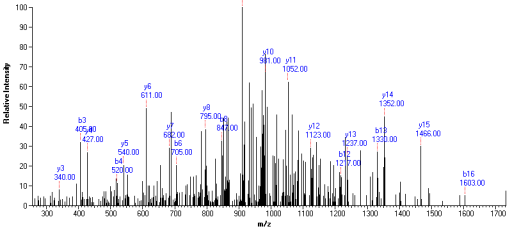

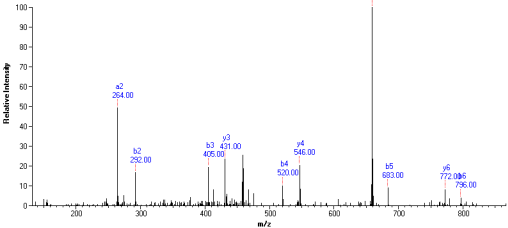

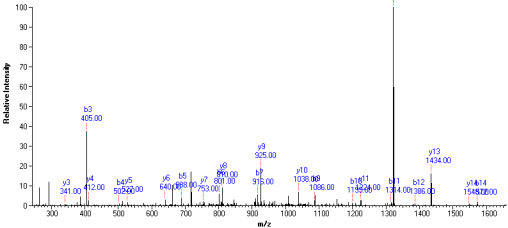



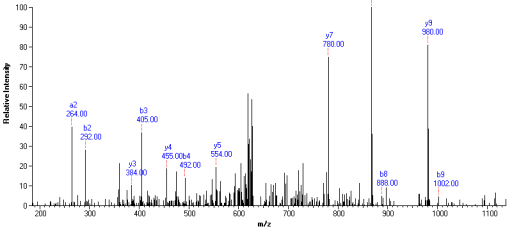

Peptide: **K(ac)LLTWR** Charge: 2+  $m/z$ : 438.78 MassError: 0.97762683ppm RetentionTime: 26.148min MascotScore: 28.59

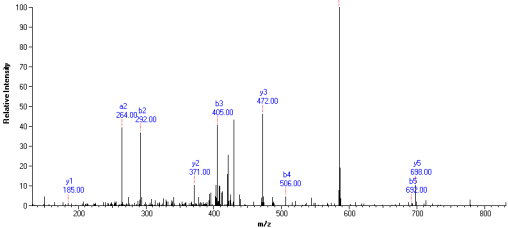

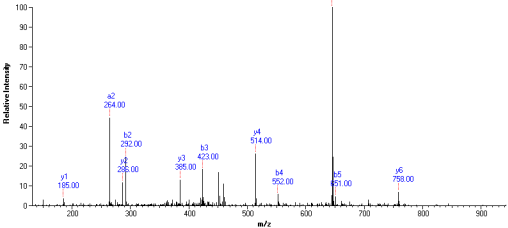

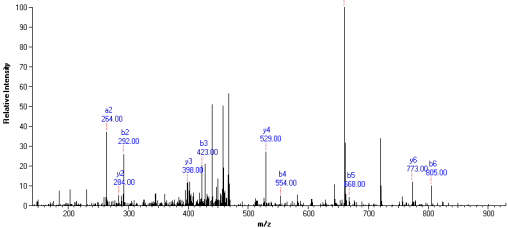

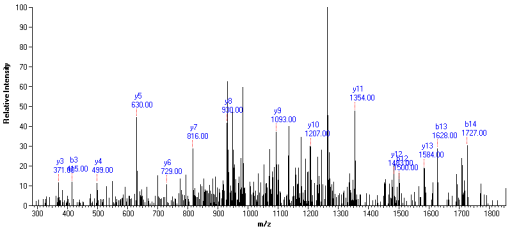

Peptide: **K(ac)LNLLVTDK**(ly\_Charge: 2+\_m/z: 551.35\_MassError: 1.4886597ppm\_RetentionTime: 27.623min\_MascotScore: 58.14

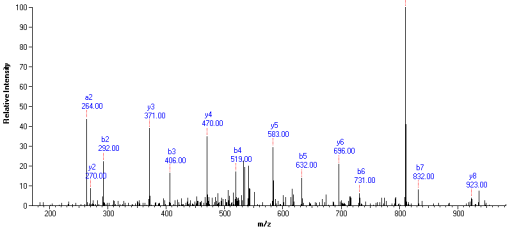

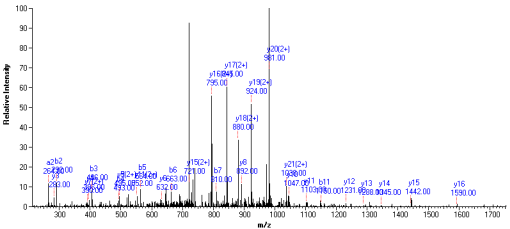

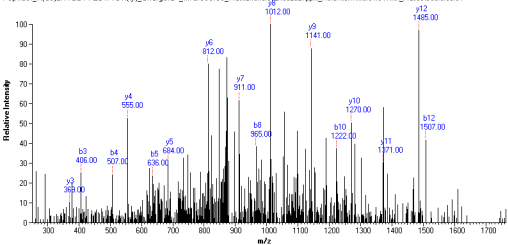



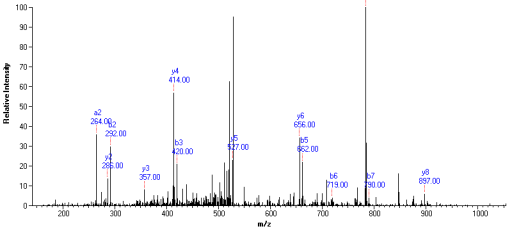

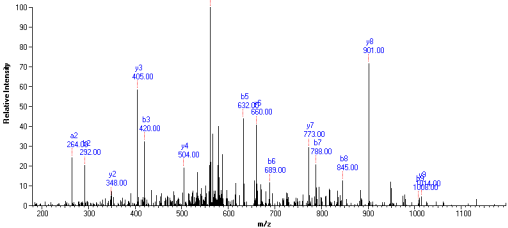

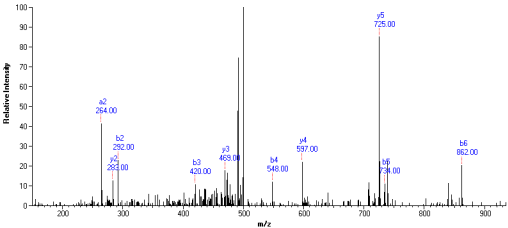

Peptide: **K(ac)LQQYR** Charge: 2+  $m/z$ : 448.26 MassError: 1.1490088ppm RetentionTime: 7.4253min MascotScore: 41.19

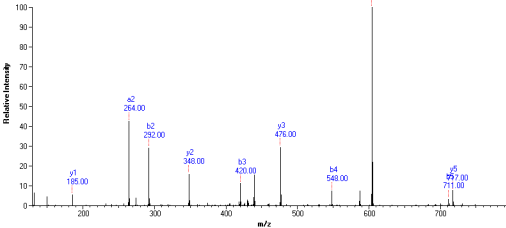

Peptide: \_K(ac)LQTWIGYPGYDQSR\_Charge: 2+\_m/z: 872.48\_MassError: 0.80917715ppm\_RetentionTime: 35.801min\_MascotScore: 69.82

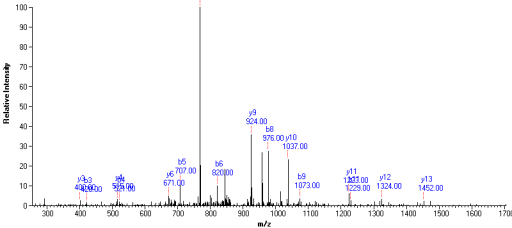

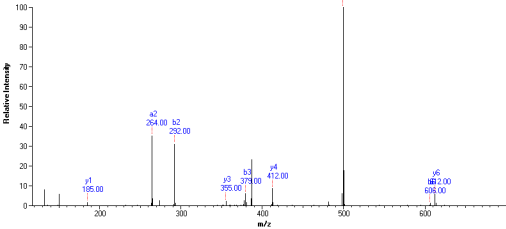

Peptide: **K(ac)LSMAPSYFSSK**(ly)\_Charge: 2+\_m/z: 702.36\_MassError: 0.7920537ppm\_RetentionTime: 24.134min\_MascotScore: 36.56

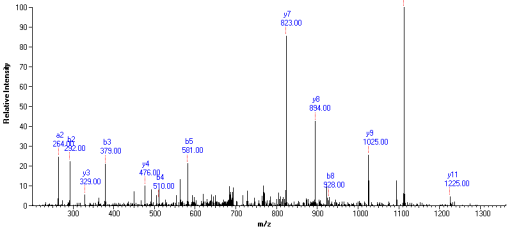

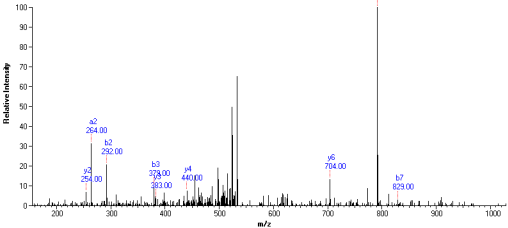



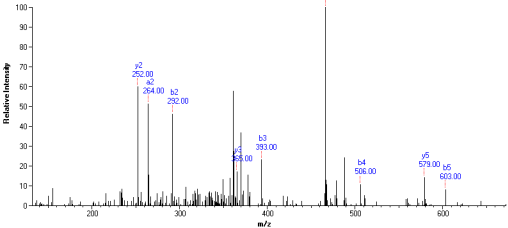

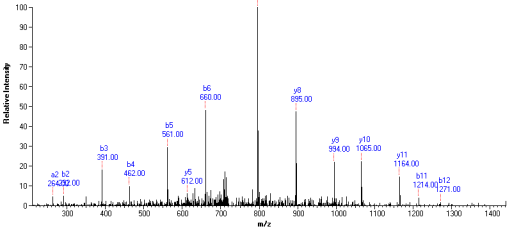

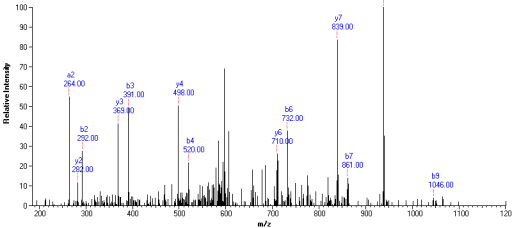

Peptide: **K(ac)MALELFK(y)PFIYGK(y)**\_Charge:2+\_m/z:876.01\_MassError:1.522261ppm\_RetentionTime:39.193min\_MascotScore:25.36

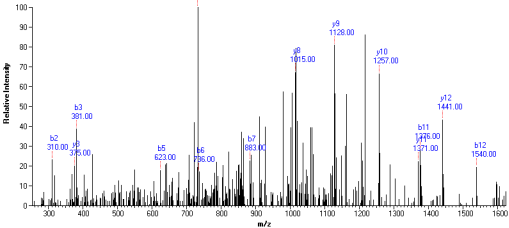

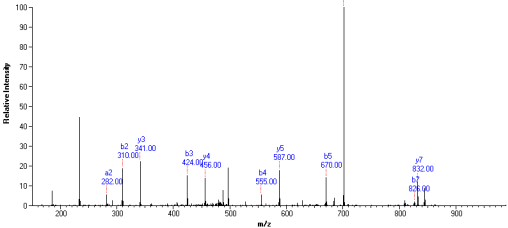

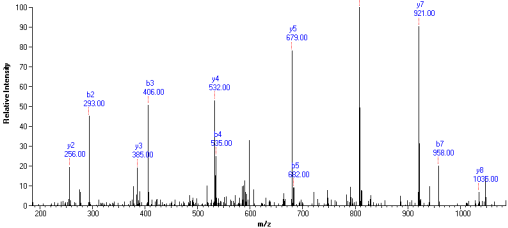

Peptide: **K(ac)NVEYLVVEAAGETR**\_Charge: 2+\_m/z: 869.46\_MassError: 16492301ppm\_RetentionTime: 37.132min\_MascotScore: 100.65

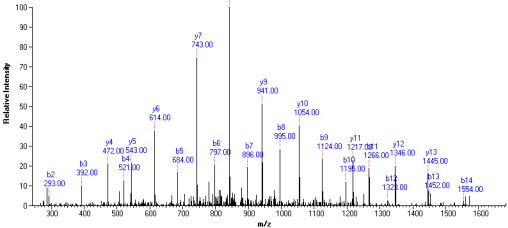

Peptide: \_K(ac)NYCLICWK(Iy)\_Charge:2+\_m/z:671.84\_MassError:0.90149122ppm\_RetentionTime:32.708min\_MascotScore:38.9

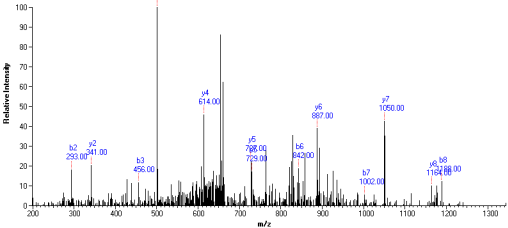



Peptide: **K(ac)PFYVGK**(ly)\_Charge: 2+\_m/z: 448.76\_MassError: 0.90383729ppm\_RetentionTime: 18.703min\_MascotScore: 24.59

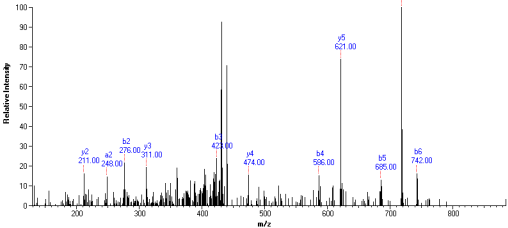

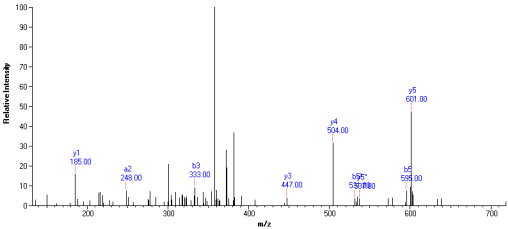

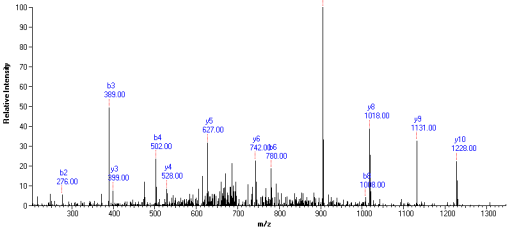

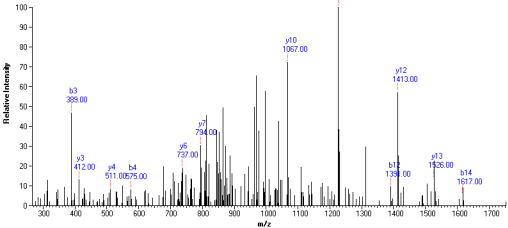

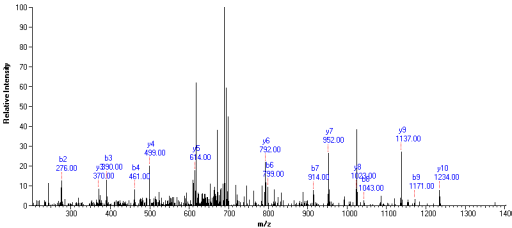

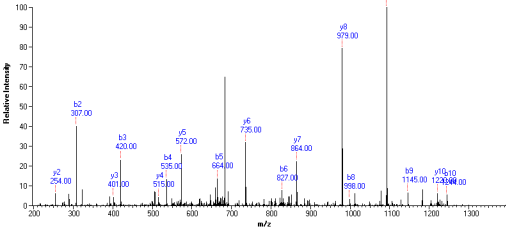

Peptide: **K(ac)QLIPQLK**(ly)\_Charge:2+\_m/z:513.34\_MassError:0.47091558ppm\_RetentionTime:27.551min\_MascotScore:41.4

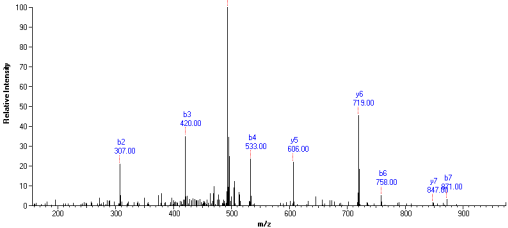

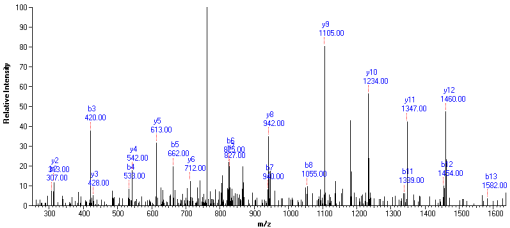



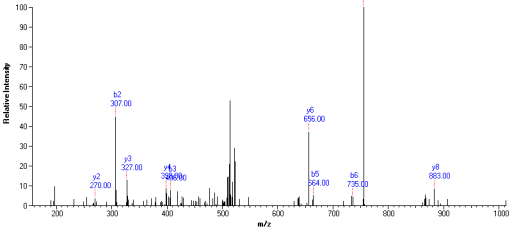

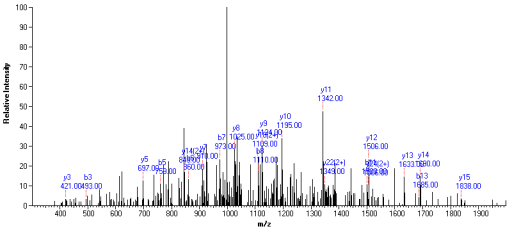

Peptide: \_K(ac)SDFDLTPFR\_Charge: 2+ m/z: 643.33\_MassError: -0.057041432ppm\_RetentionTime: 33.199min\_MascotScore: 45.47

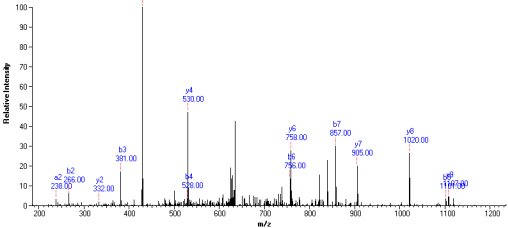

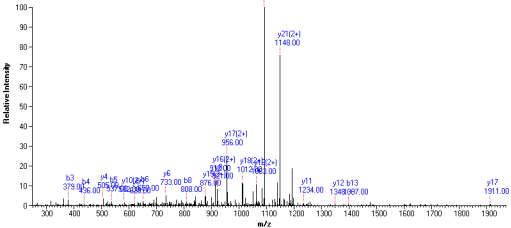

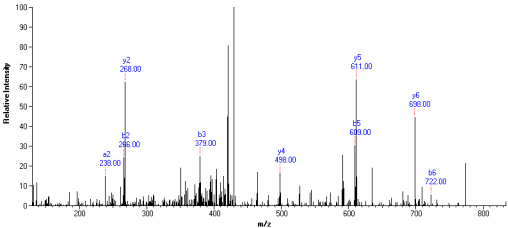

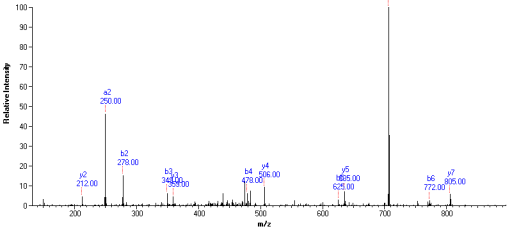

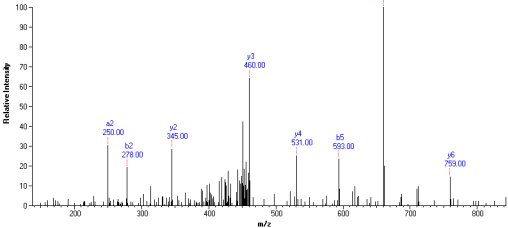

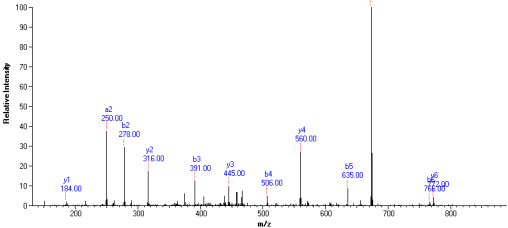



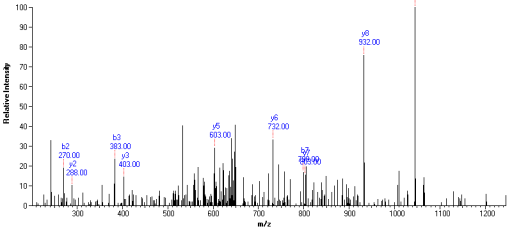

Peptide: **K[ac]VK[ac]VYVNGLGK**(ly\_Charge: 2+\_m/z: 575.37\_MassError: -0.082086864ppm\_RetentionTime: 15.145min\_MascotScore: 38.68

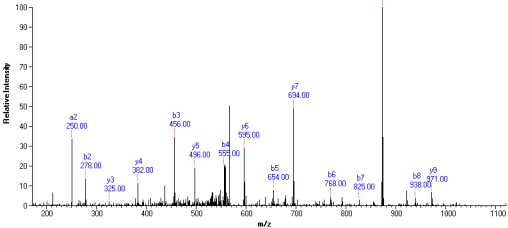

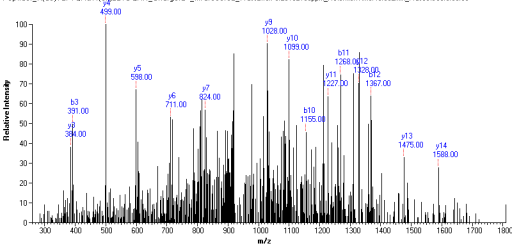

Peptide: **K(ac)VYLA<sup>2</sup>AAPEIR** Charge: 2+  $m/z$ : 689.4  $\Delta$ MassError: 0.565231 ppm RetentionTime: 22.507min MascotScore: 47.14

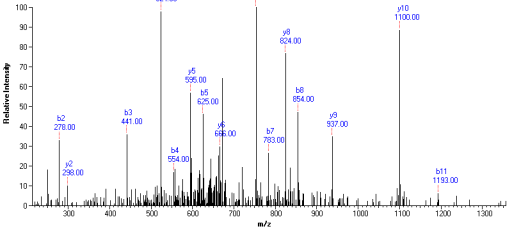

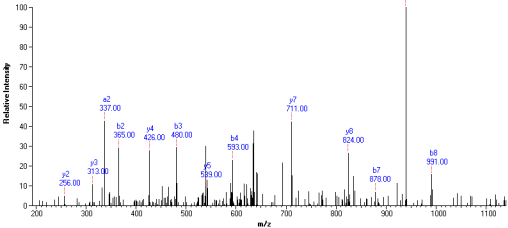

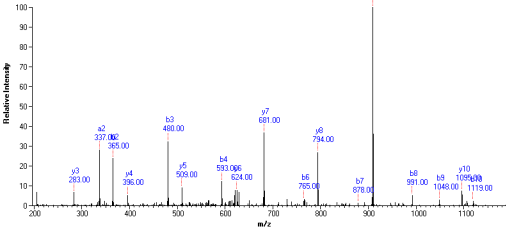

Peptide: **K(ac)WFGTEPK**(ly)\_Charge: 2+\_m/z: 525.78\_MassError: -1.746146ppm\_RetentionTime: 23.294min\_MascotScore: 21.2

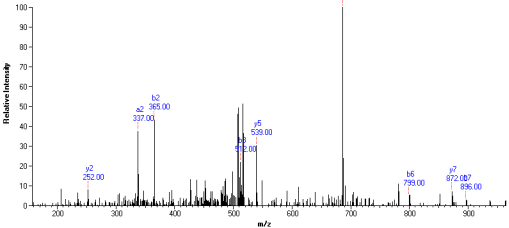

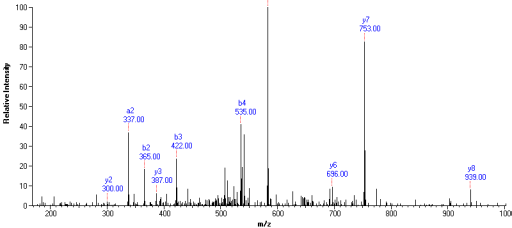



Peptide: **K(ac)WQGVIK(Iy)\_Charge:2+\_m/z:458.78\_MassError:2.5790581ppm\_RetentionTime:16.023min\_MascotScore:33.66**

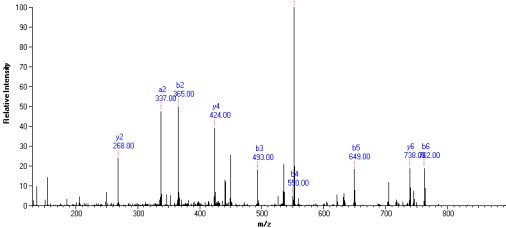

Peptide: **K(ac)WTDQSGQDR**\_Charge: 2+\_m/z: 640.8\_MassError: 1.446311ppm\_RetentionTime: 8.7859min\_MascotScore: 50.82

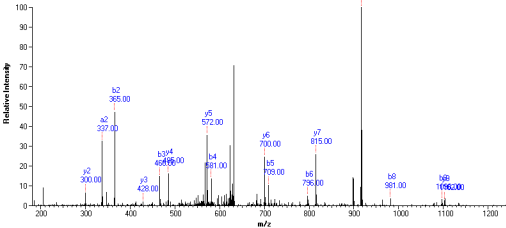

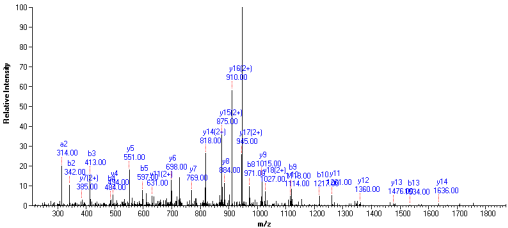

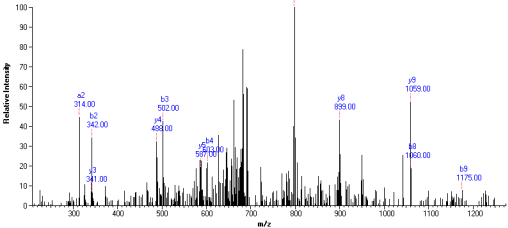

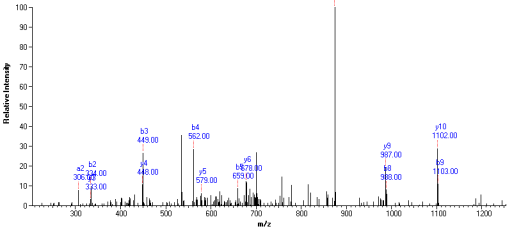

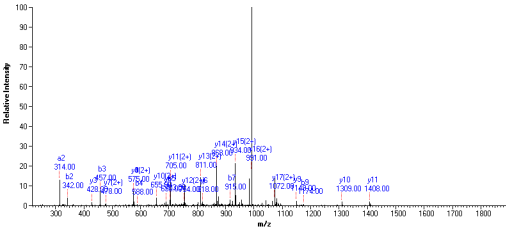

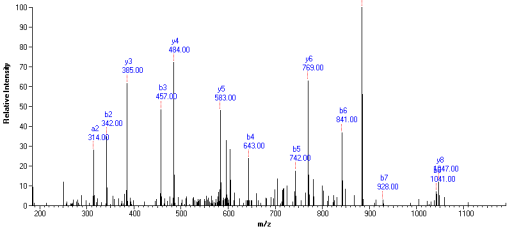

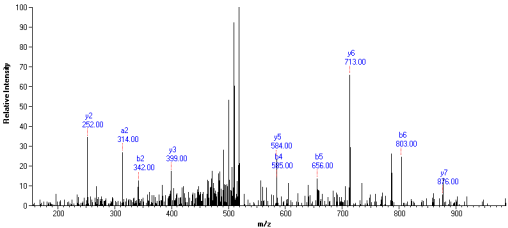



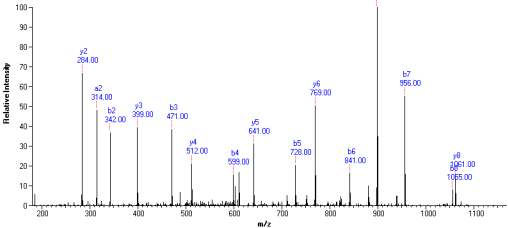

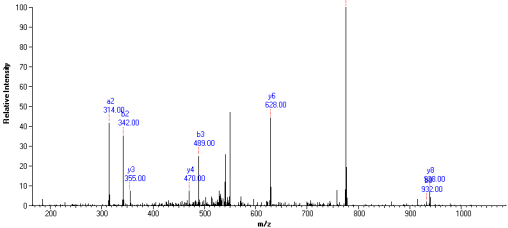

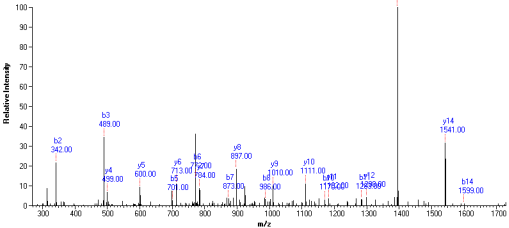

Peptide: **K(ac)YGDMINHR** Charge: 2+  $m/z$ : 597.3  $MassError$ : 2.2238756ppm  $RetentionTime$ : 9.8399min  $MassotScore$ : 59.99

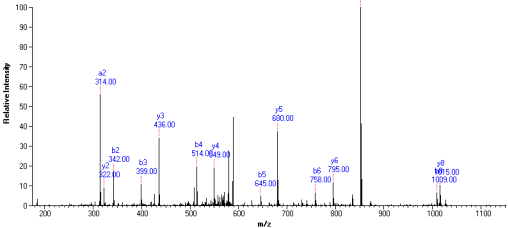

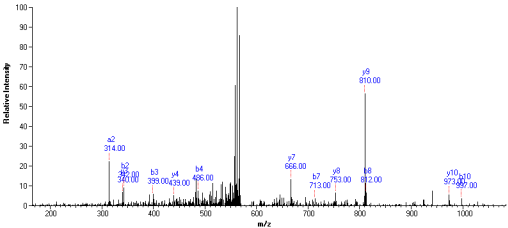

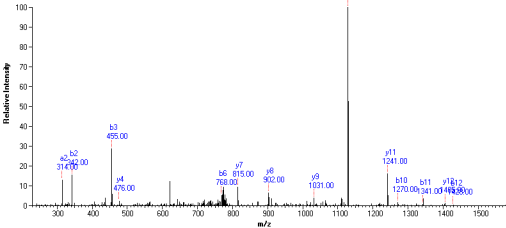

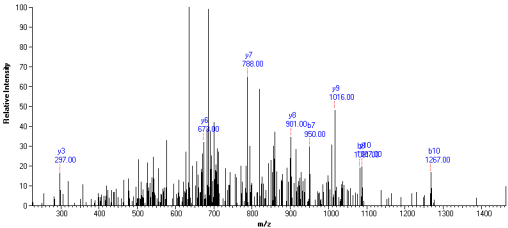

Peptide: **K**(ac)YRPETDMADLDNFDSA**K**(ly)\_Charge:3+\_m/z:728.68\_MassError:1.1703254ppm\_RetentionTime:24.229min\_MascotScore:51.35

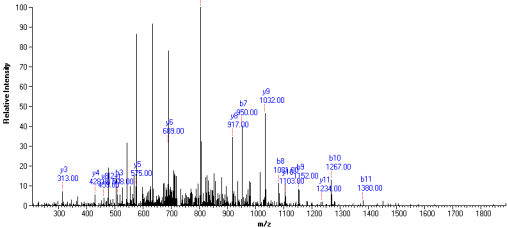



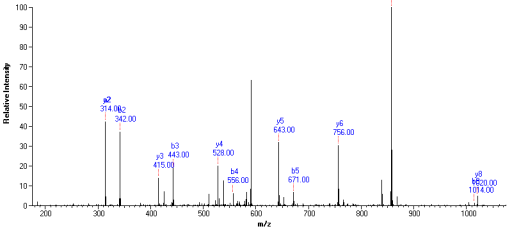

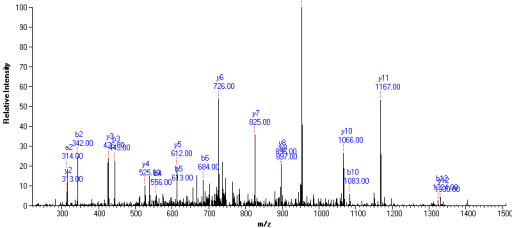

Peptide: \_K(ac)YYDPR\_Charge: 2+\_m/z: 451.23\_MassError: 1.7895288ppm\_RetentionTime: 9.1564min\_MascotScore: 28.77

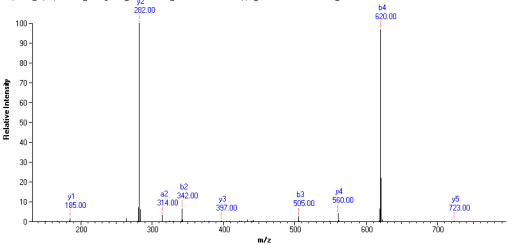

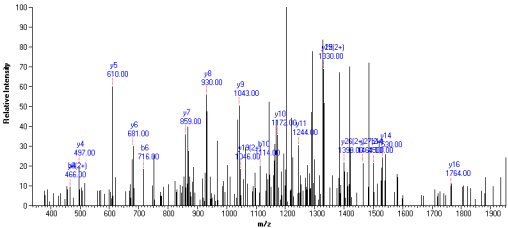

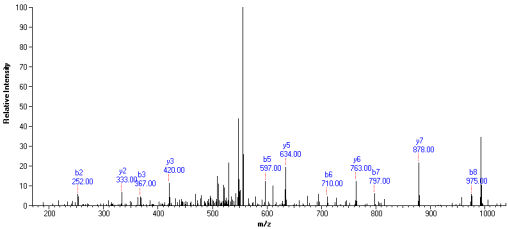

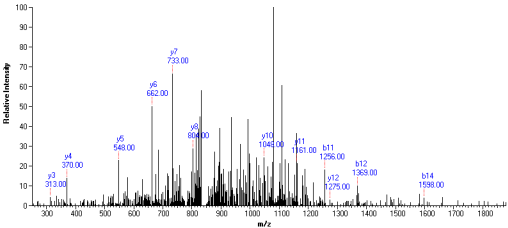

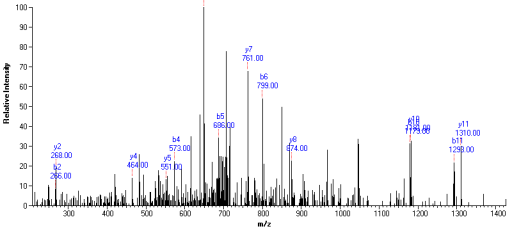

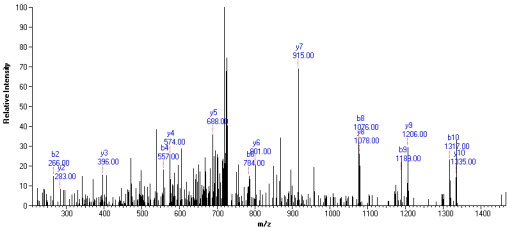



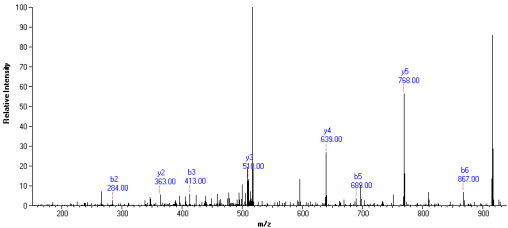

Peptide: \_K(IY)GMASGAVIESFLDK(ac)GR\_Charge: 2+\_m/z: 917.49\_MassError: 0.63352124ppm\_RetentionTime: 33.069min\_MascotScore: 100.82

Relative Intensity

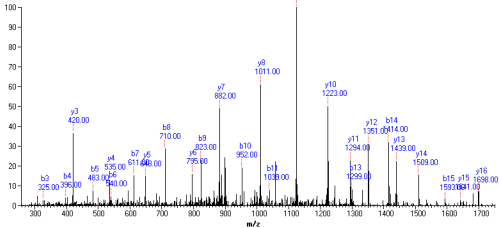

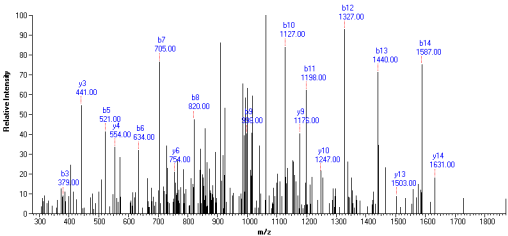

Peptide: \_K(IY)YADK(ac)LEQEK(IY)\_Charge: 2+\_m/z: 715.9\_MassError: 1.786492ppm\_RetentionTime: 12.157min\_MascotScore: 57.96

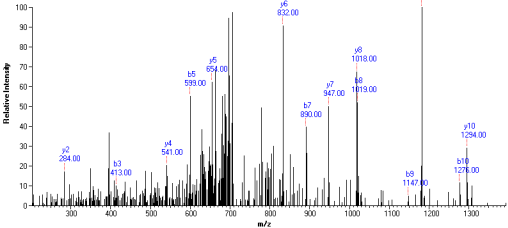

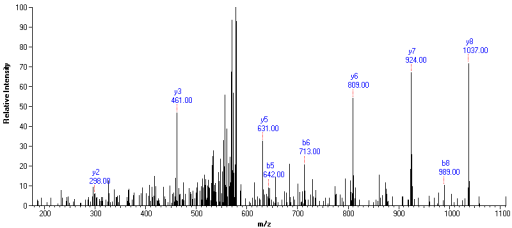

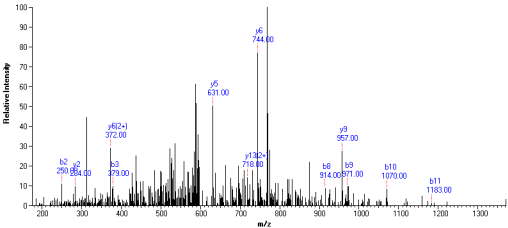

Peptide: \_K(IY)LEMHGHLVK(ac)AAVELAK(IY)\_Charge: 3+\_m/z: 690.4\_MassError: 1012.3693ppm\_RetentionTime: 24.823min\_MascotScore: 22.8

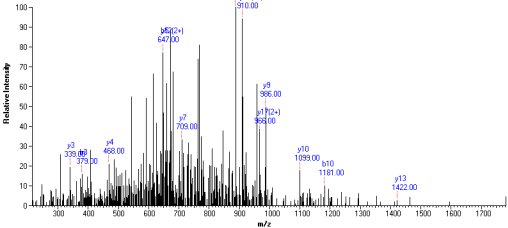

Peptide: **K**(I)Y)PQDLFDEFAGK(ac)HK(I)Y)\_ Charge: 3+ \_m/z: 575.97\_ MassError: 0.54893167ppm\_ RetentionTime: 29.595min\_ MascotScore: 51.12

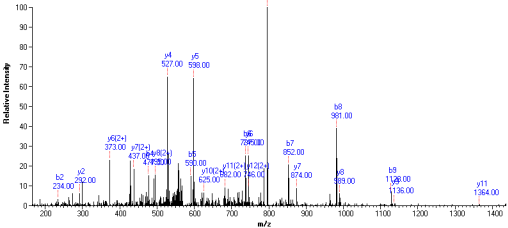



Peptide: **K**(**y**)**Q**D**I**I**F**A**I**L**K**(**ac**)**Q**H**A**K(**y**)\_Charge:3+\_m/z:573.68\_MassError:-1.078252ppm\_RetentionTime:29.541min\_MascotScore:25.29

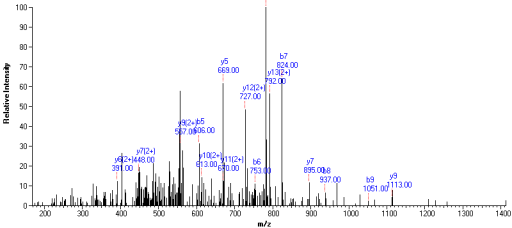

Peptide: **K**(**l**)**Q**I**D**E**Y**G**N**F**V**K(**ac**)**I****Y****G****A**K(**l**)**y**\_Charge:2+\_m/z:970.53\_MassError:2.7533756ppm\_RetentionTime:30.803min\_MascotScore:68.66

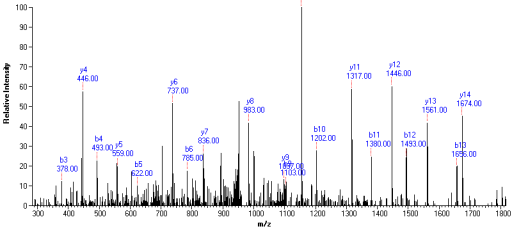

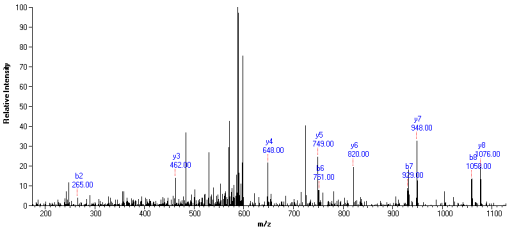

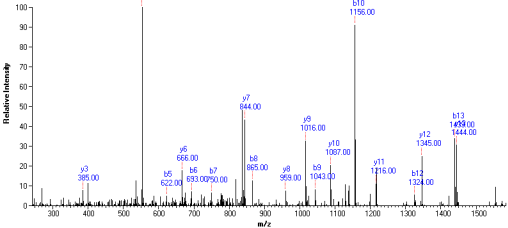

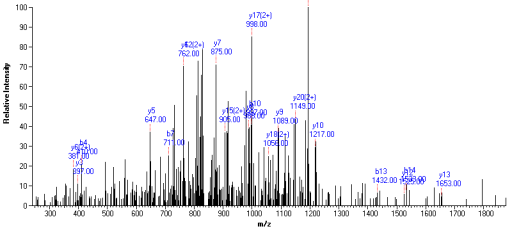

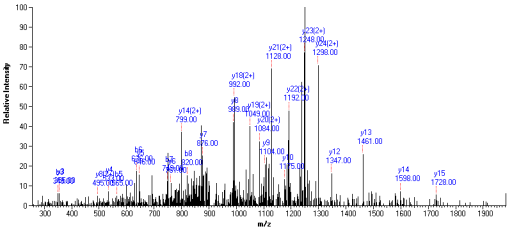

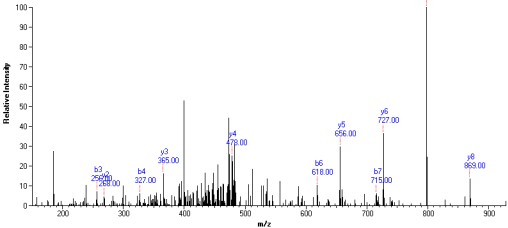

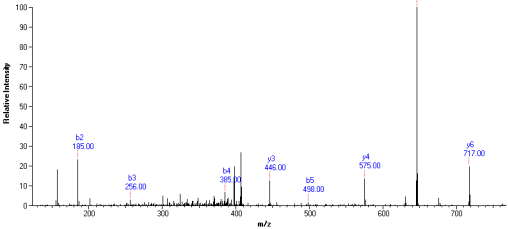



Peptide: LAALDLVK(ac)[K](ly)\_Charge: 2+\_m/z: 514.84\_MassError: -0.56742425ppm\_RetentionTime: 29.815min\_MascotScore: 41.27

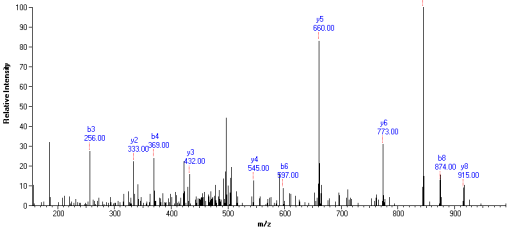

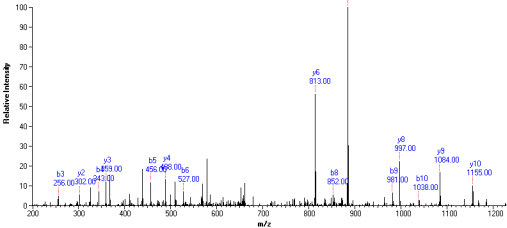

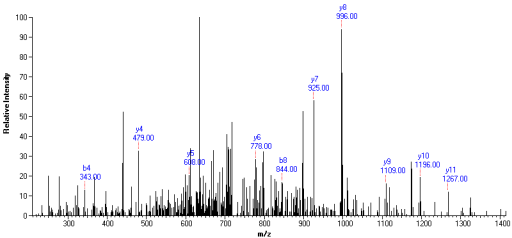

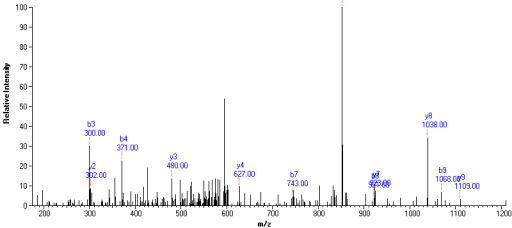

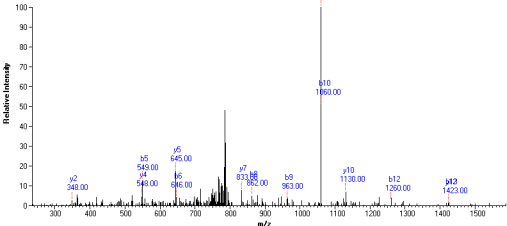

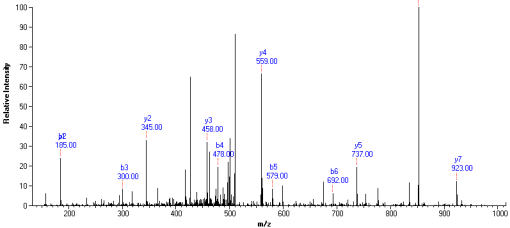

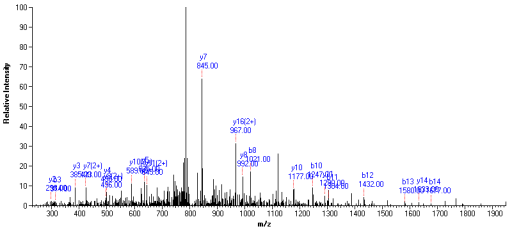

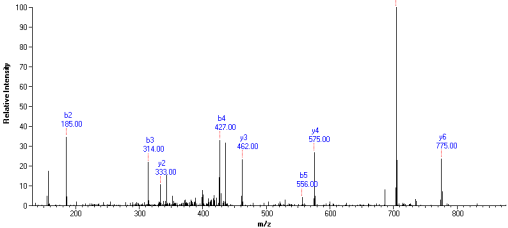



Peptide: \_LAGAK(ac)TEAK(Iy)\_Charge:2+\_m/z:473.78\_MassError:0.69029539ppm\_RetentionTime:8.436min\_MascotScore:32.21

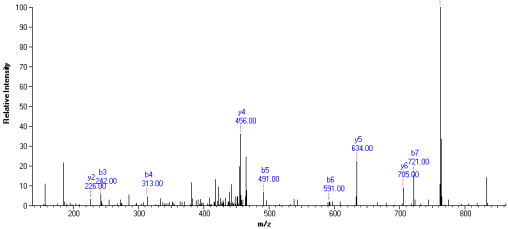

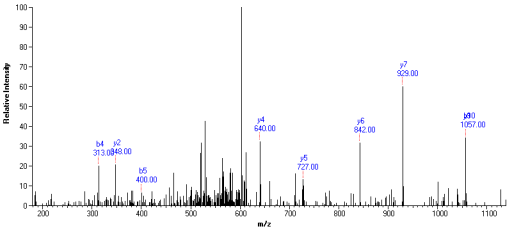

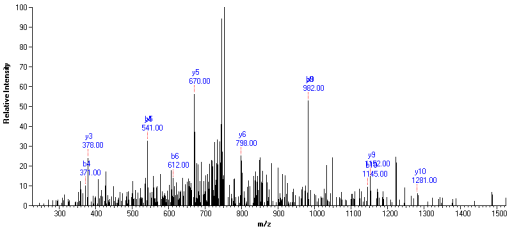

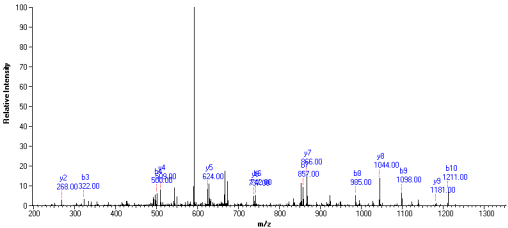

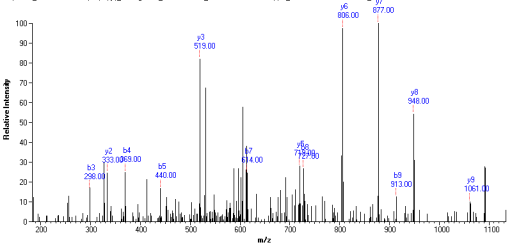

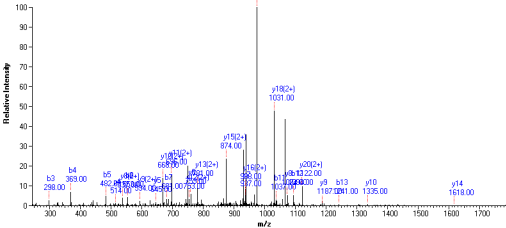

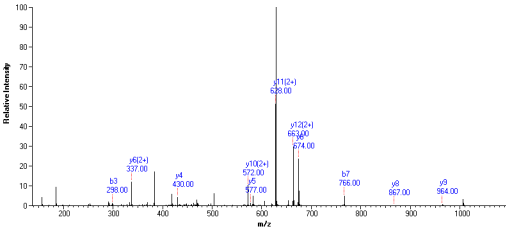

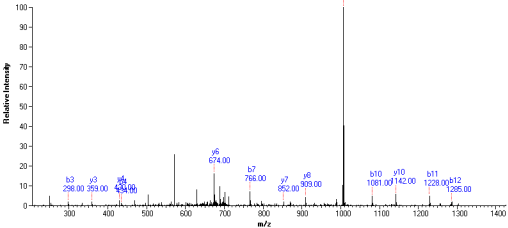



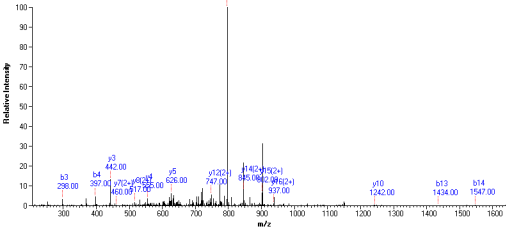

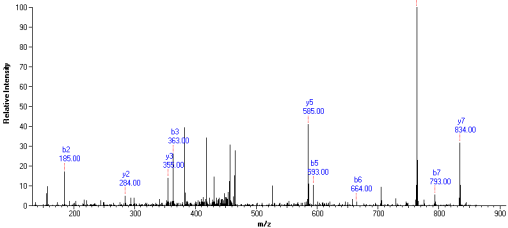

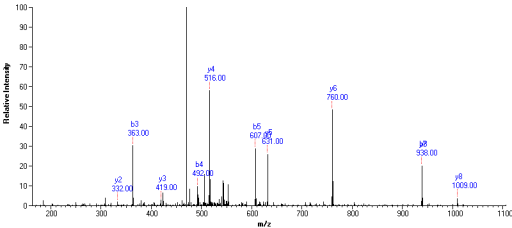

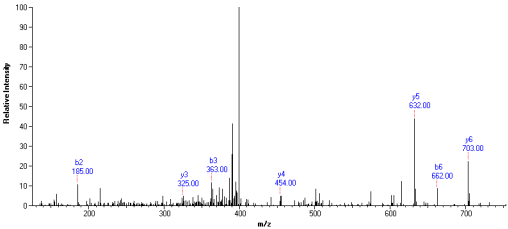

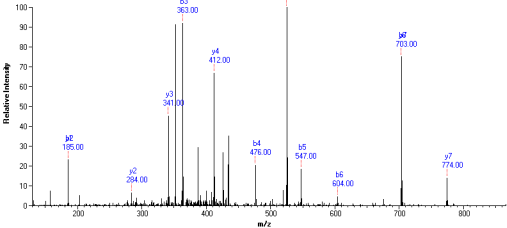

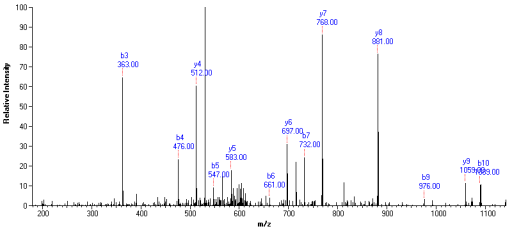

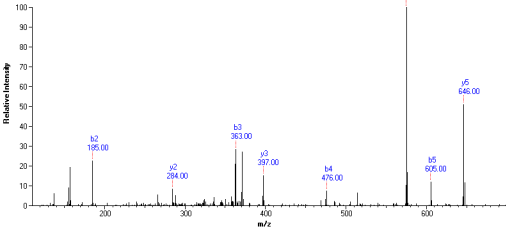

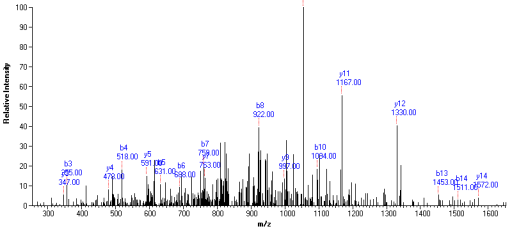



Peptide: \_LAMK(ac)YHPDR\_Charge: 2+\_m/z: 595.81\_MassError: 3.8379817ppm\_RetentionTime: 10.519min\_MascotScore: 37.18

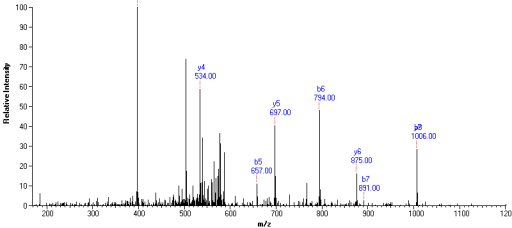

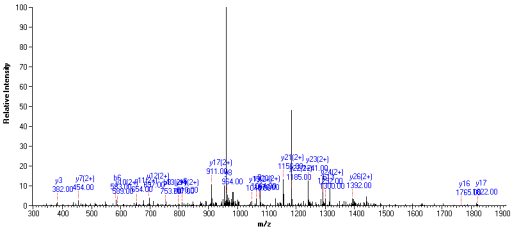

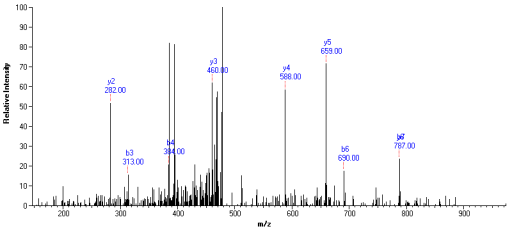

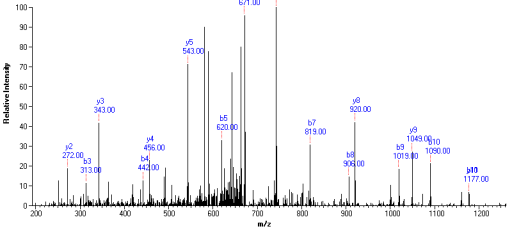

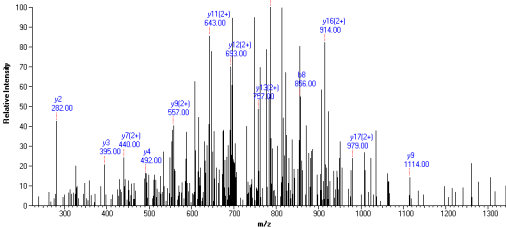

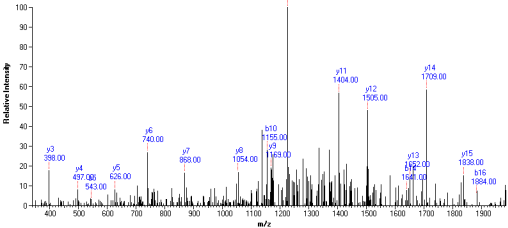

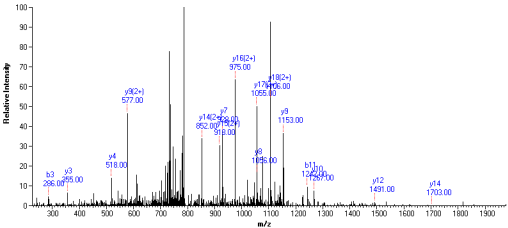

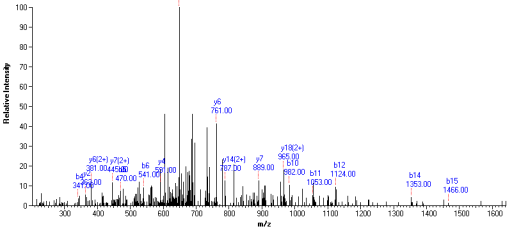



Peptide: \_LAVSK(ac)Y PVER\_Charge: 2+\_m/z: 611.35\_MassError: 1.0287947ppm\_RetentionTime: 20.882min\_MascotScore: 44.07

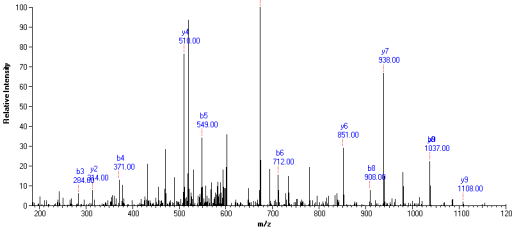

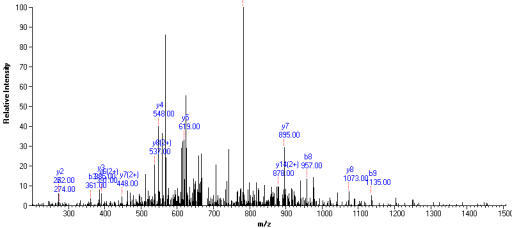

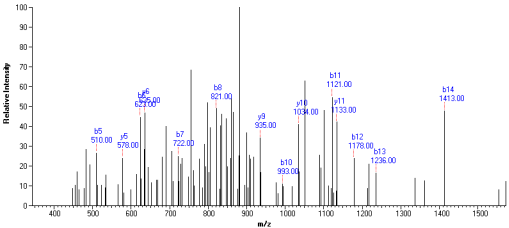

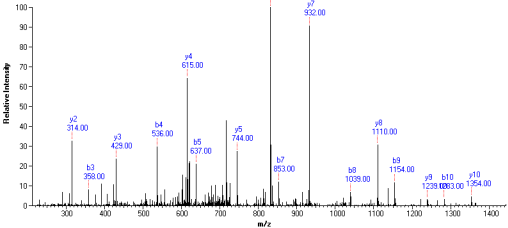

Peptide: LDGK(ac)PLLTGK(Iy)\_Charge:2+\_m/z: 550.34\_MassError:0.80880074ppm\_RetentionTime:23.819min\_MascotScore:60.79

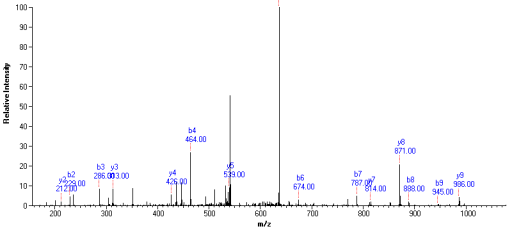

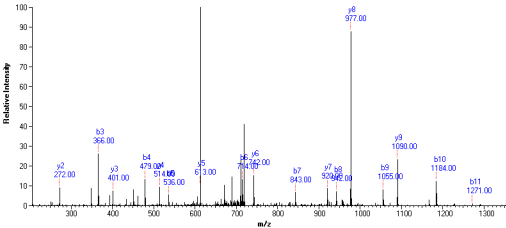

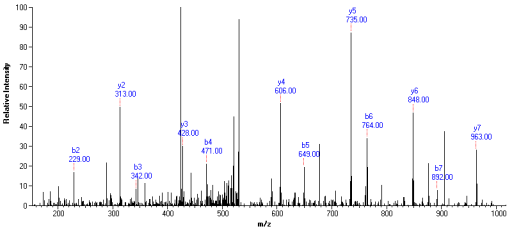

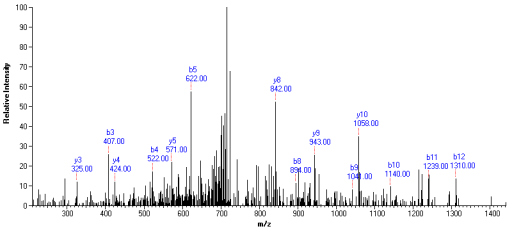



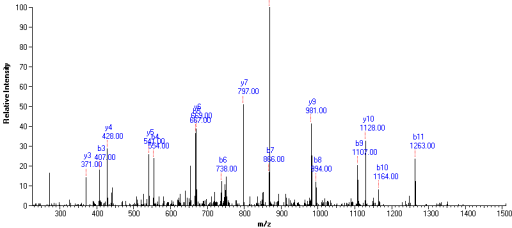

Peptide: \_LDK(ac)LPR\_Charge: 2+\_m/z: 401.25\_MassError: 3.4235261ppm\_RetentionTime: 11.576min\_MaxcortScore: 34.13

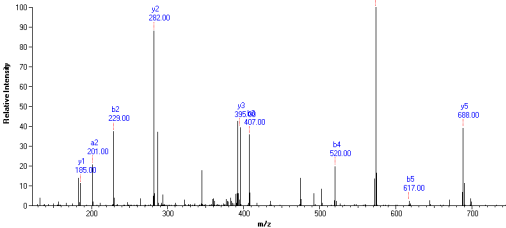

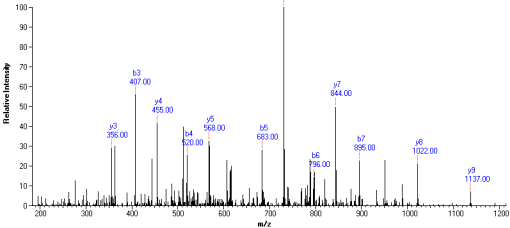

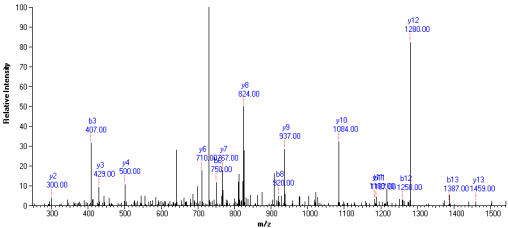

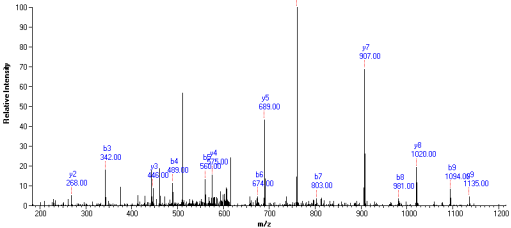

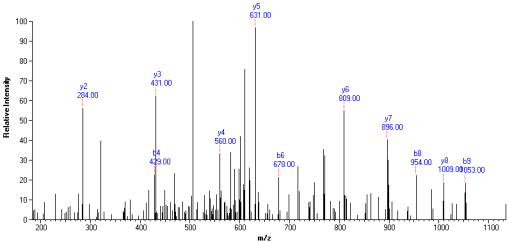

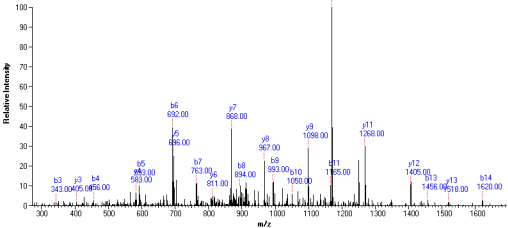

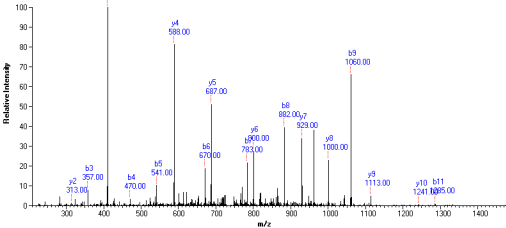



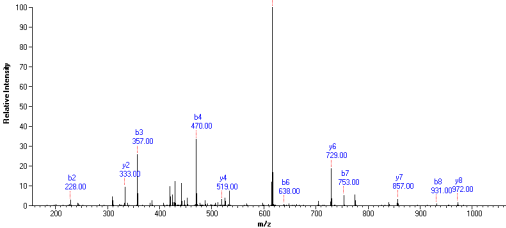

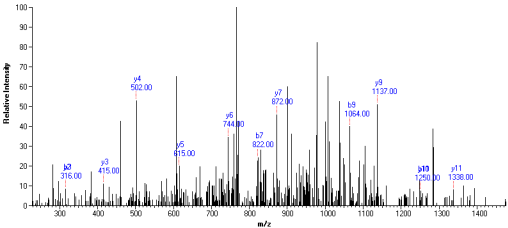

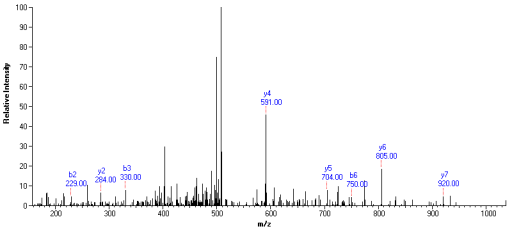

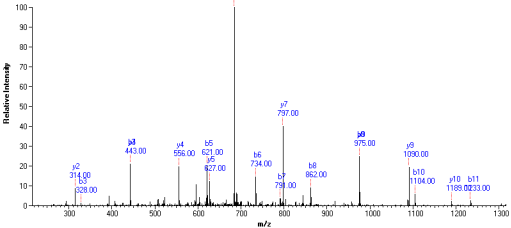

Peptide: LDVEIK(ac)DR\_Charge: 2+\_m/z: 524.29\_MassError: 1.102931ppm\_RetentionTime: 22.542min\_MascotScore: 49.1

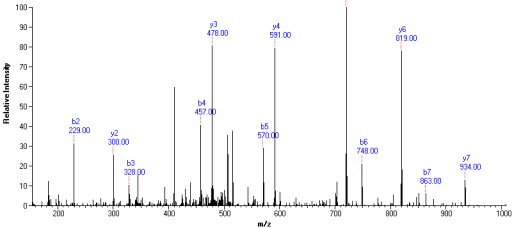

Peptide: LDVK(ac)IPVVFIMK(Iy)\_Charge:2+\_m/z:780.98\_MassError:6.0744748ppm\_RetentionTime:40.995min\_MascotScore:46.54

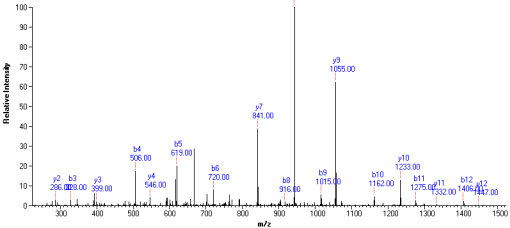

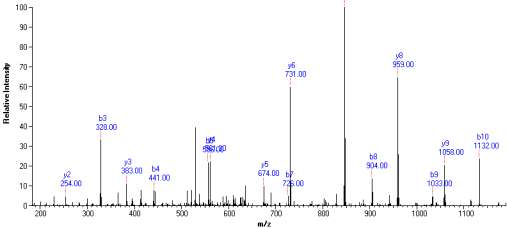

Relative Intensity

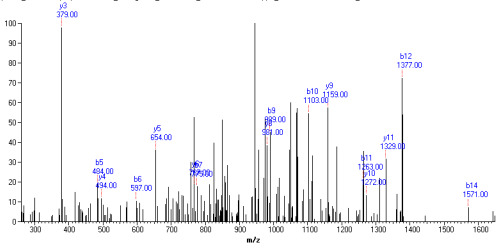



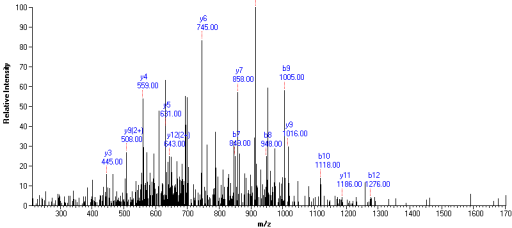

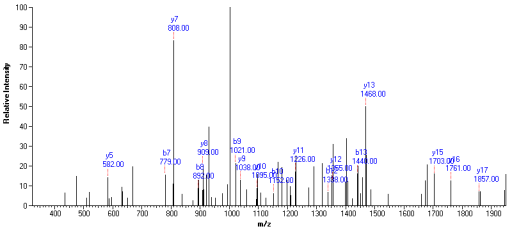

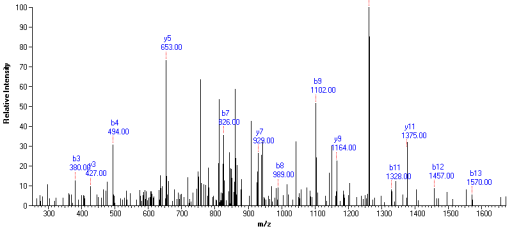

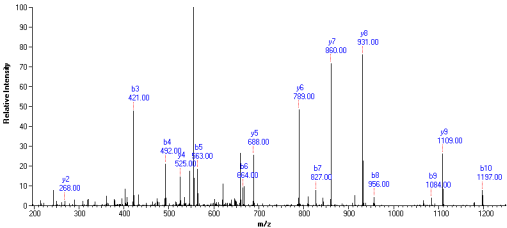

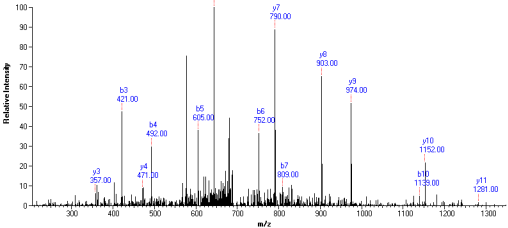

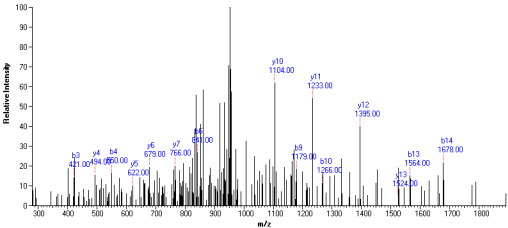

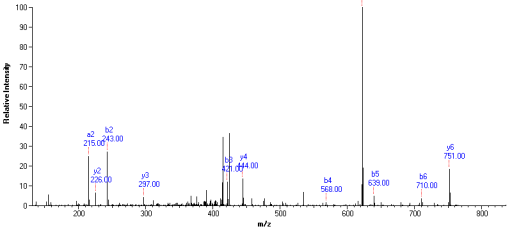

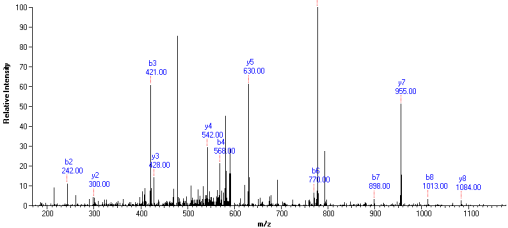



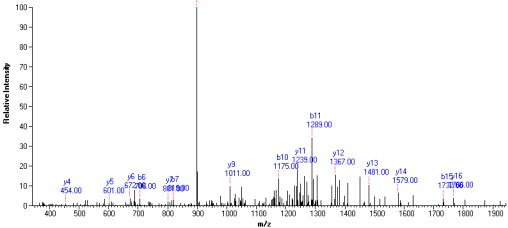

Peptide: \_LEK(ac)LTQLISAAQK(Iy)\_Charge: 2+\_m/z: 750.95\_MassError: 1.636684ppm\_RetentionTime: 38.967min\_MascotScore: 100.4

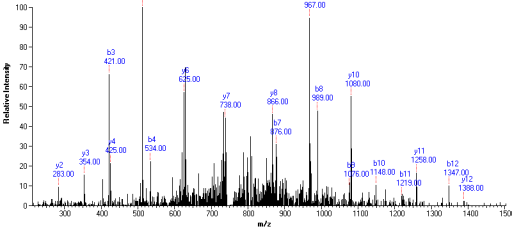

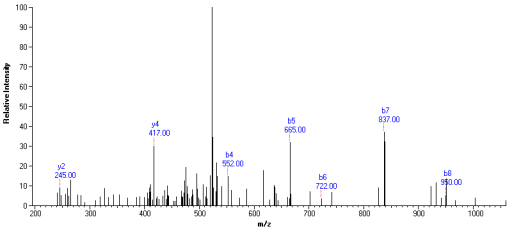

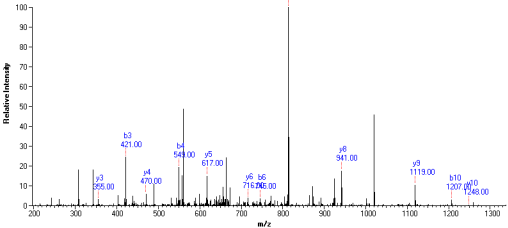

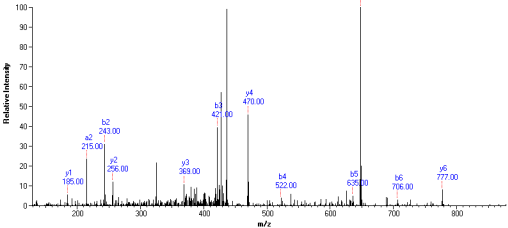

Peptide: \_LEK(ac)VLK(Iy)\_Charge: 2+\_m/z: 394.27\_MassError: 1.8542116ppm\_RetentionTime: 14.45min\_MascotScore: 32.75

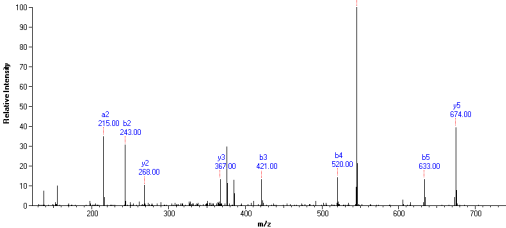

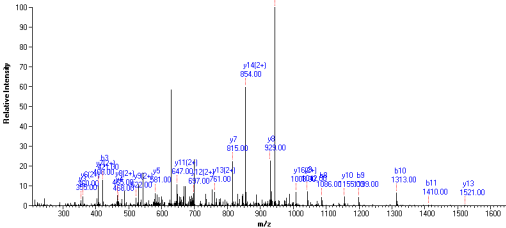

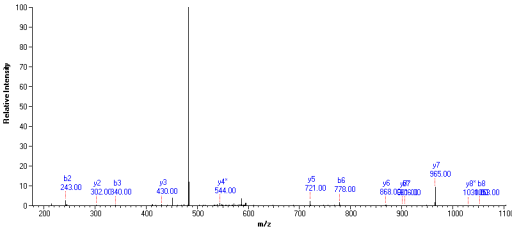



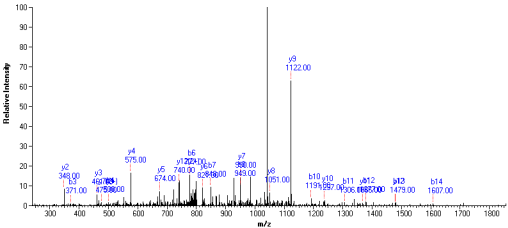

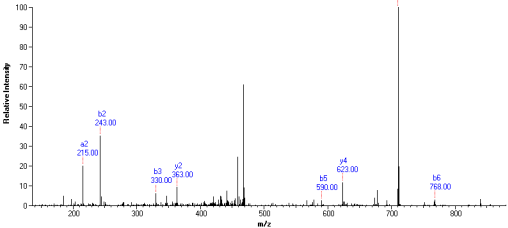

Peptide: \_LESGYLYLGSPYK(ac)QIR\_Charge: 2+\_m/z: 942.02\_MassError: 1.6629334ppm\_RetentionTime: 38.014min\_MaxcotScore: 56.28

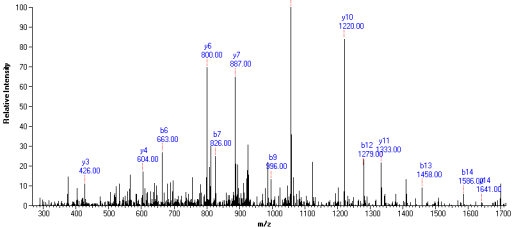

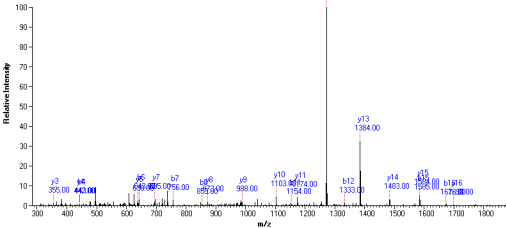

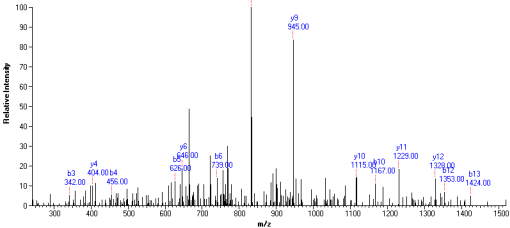

Relative Intensity

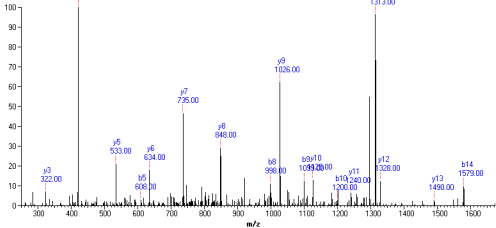

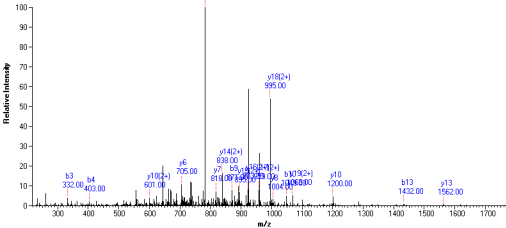

Peptide: \_LFEEK(ac)R\_Charge:2+\_m/z: 441.25\_MassError:1.9435432ppm\_RetentionTime:11.314min\_MaxcotScore:30.78

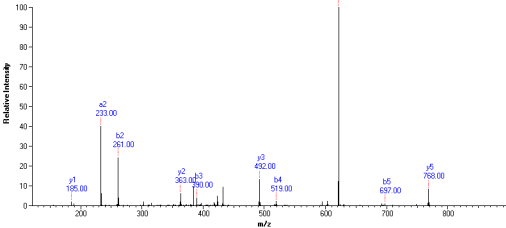



Peptide: \_LFGK(ac)PEIDGSR\_Charge:2+\_m/z: 639.84\_MassError:0.29555314ppm\_RetentionTime:26.384min\_MassotScore:32.75

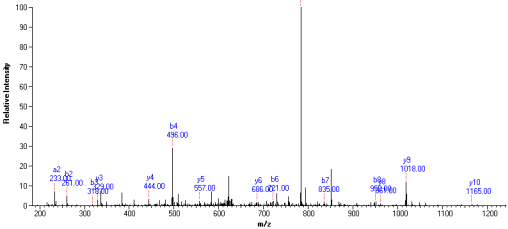

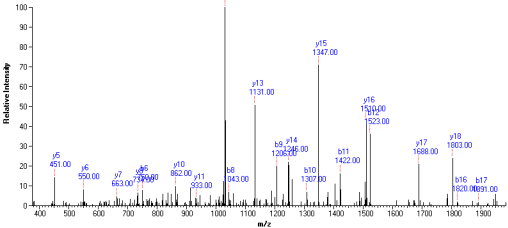

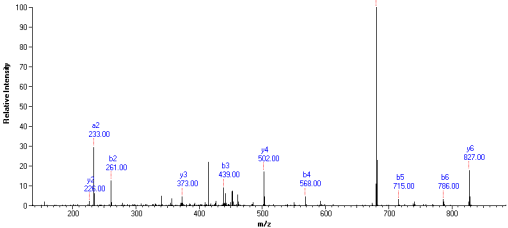

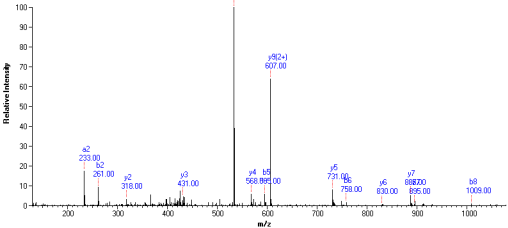

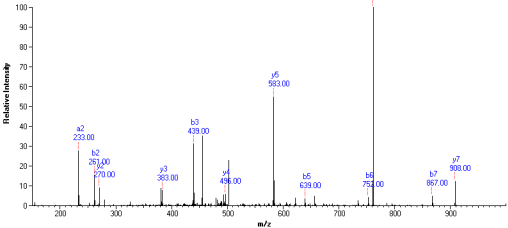

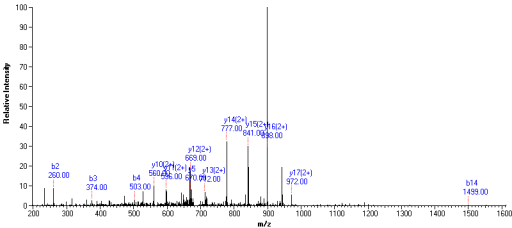

Peptide: \_LFVEPNPIPVK(ac)WACK(y) Charge: 2+ m/z: 928.51 MassError: 1.1543466ppm RetentionTime: 40.066min MascotScore: 42.98

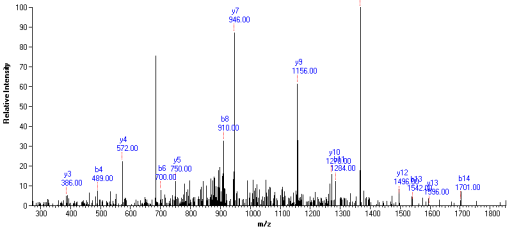

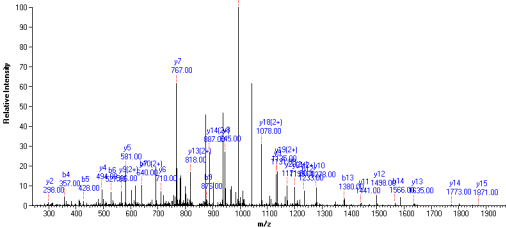



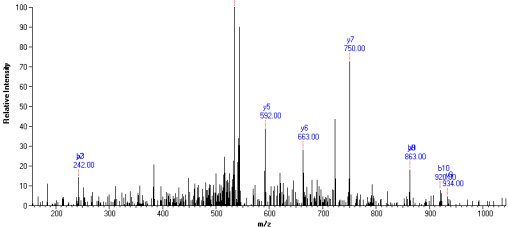

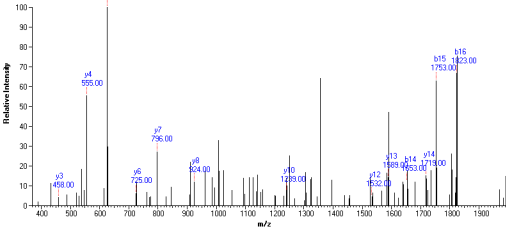

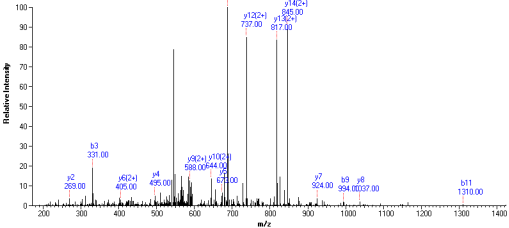

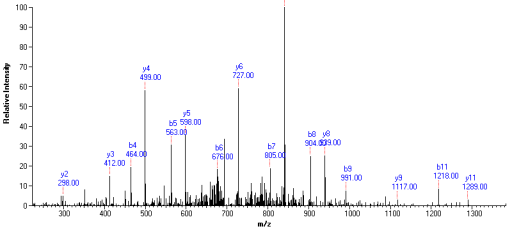

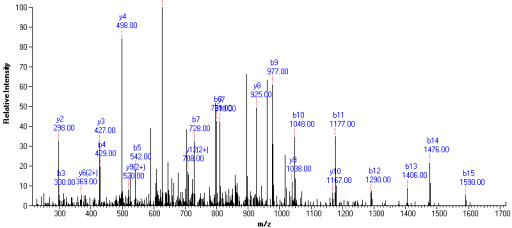

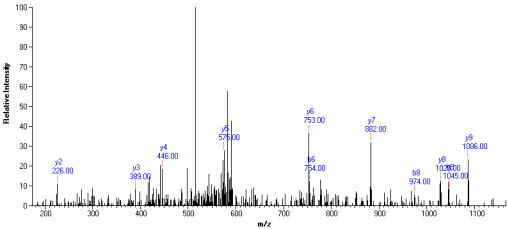

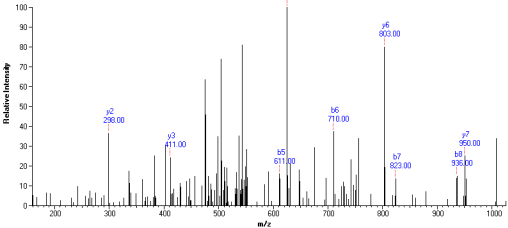

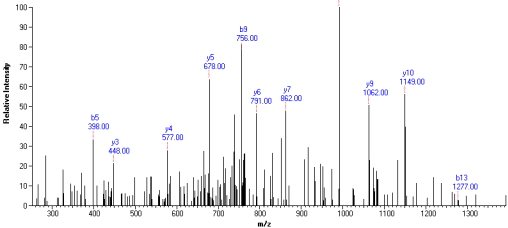



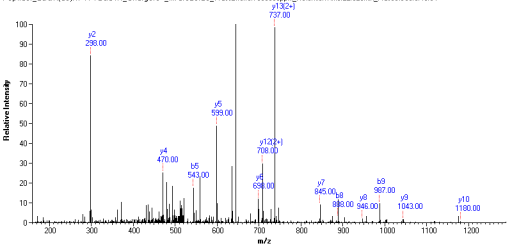

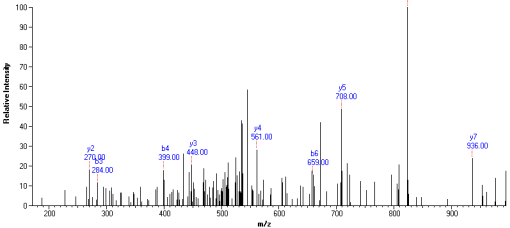

Peptide: **LGINPDFYEK(ac)R**\_Charge: 2+\_m/z: 706.37\_MassError: 1.1439274ppm\_RetentionTime: 31.005min\_MascotScore: 63.32

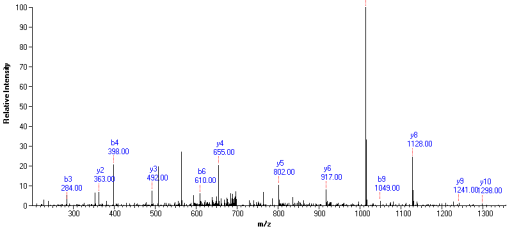

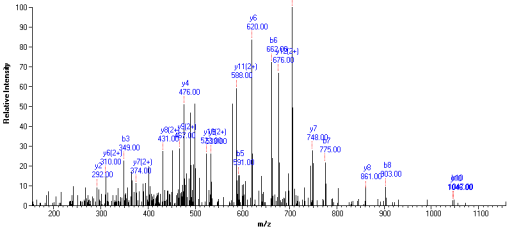

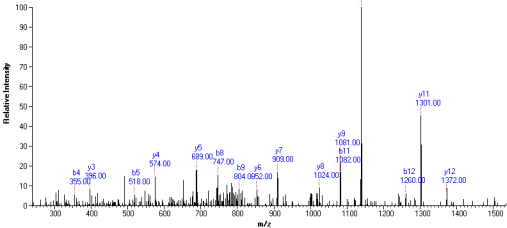

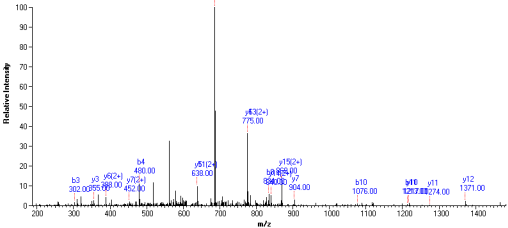

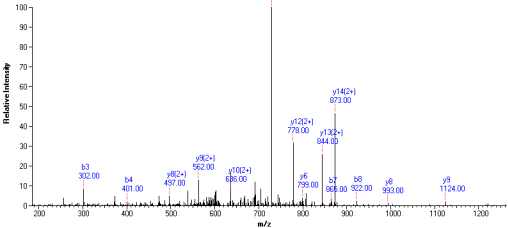

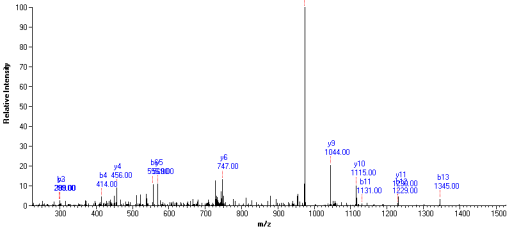



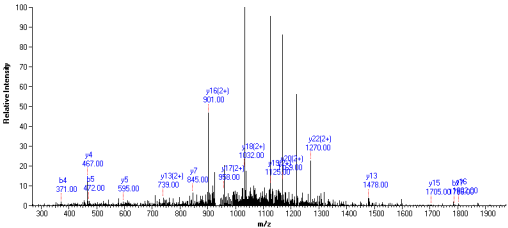

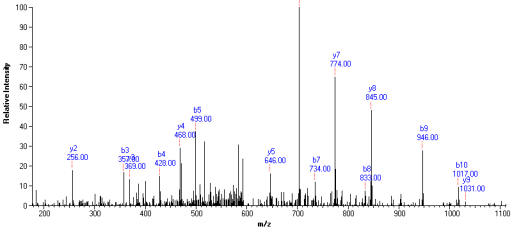

Peptide: LGWK(ac)AEK(lv)\_Charge:2+\_m/z:445.26\_MassError:0.95194124ppm\_RetentionTime:16.85min\_MascotScore:44.1

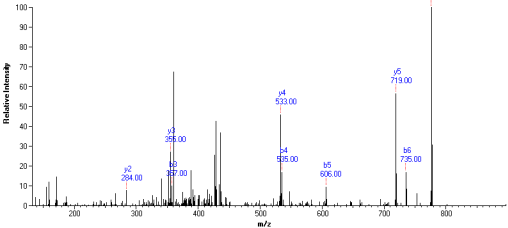

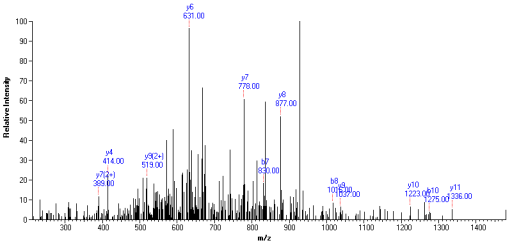

Peptide: LHDYYK(ac)DEVYK(Iy)\_Charge: 2+\_m/z: 733.88\_MassError: 0.71870276ppm\_RetentionTime: 19.639min\_MascotScore: 70.12

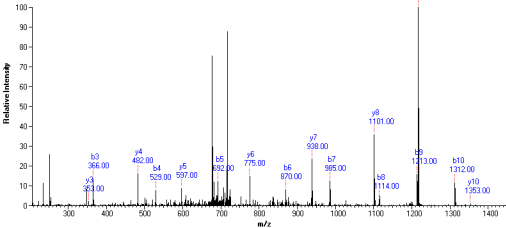

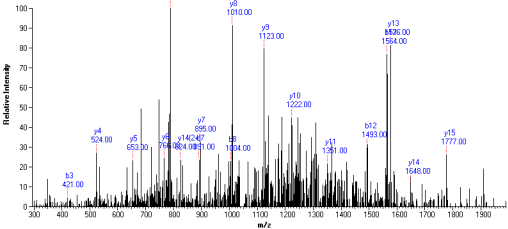

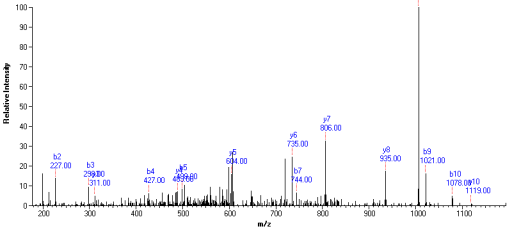

Peptide: \_LIAGILPDLLVK(ac)GGDYK(y)PEELAGSK(y)\_Charge: 3+\_m/z: 888.51\_MassError: 4.0780314ppm\_RetentionTime: 40.793min\_MascotScore: 24.69

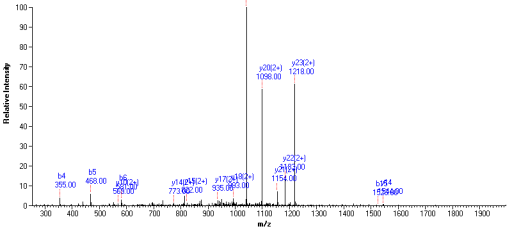



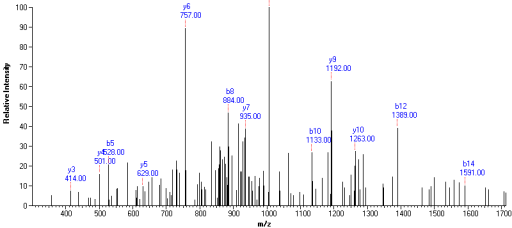

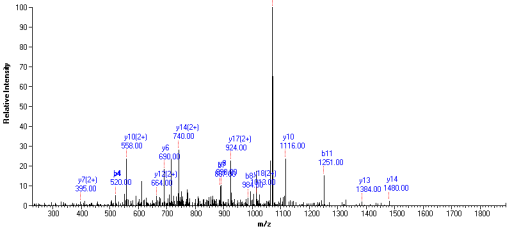

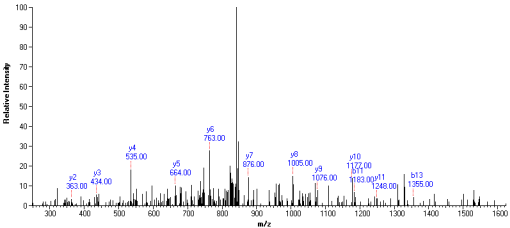

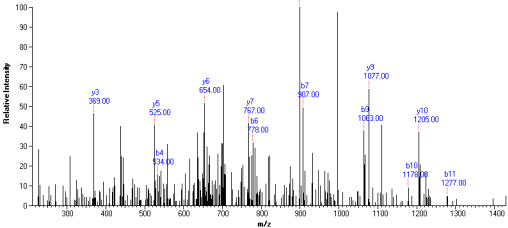

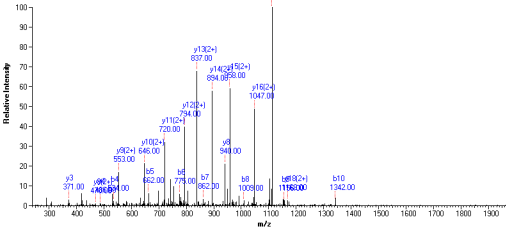

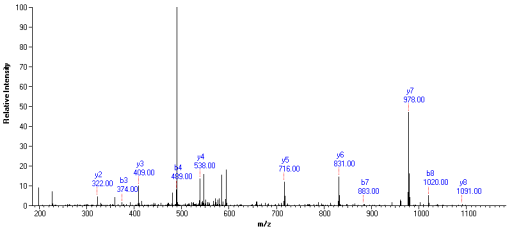

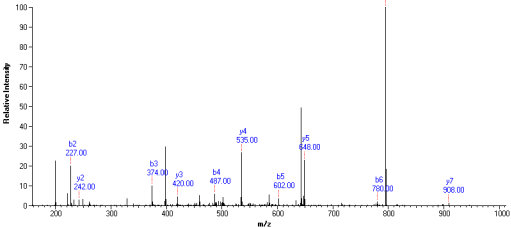

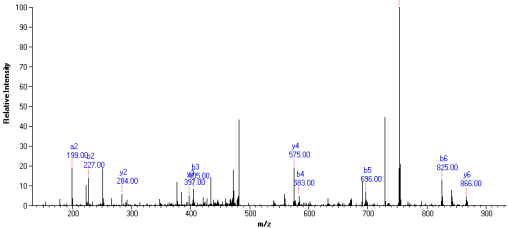



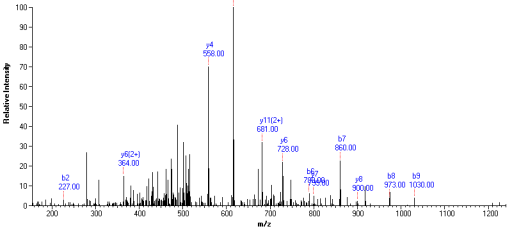

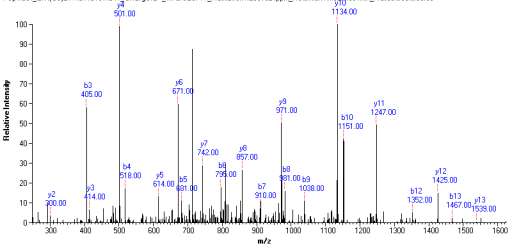

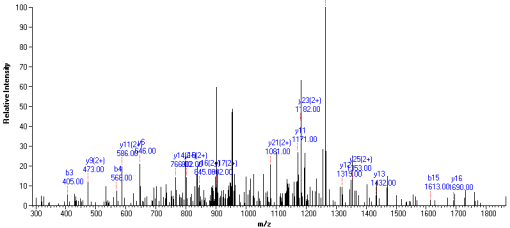

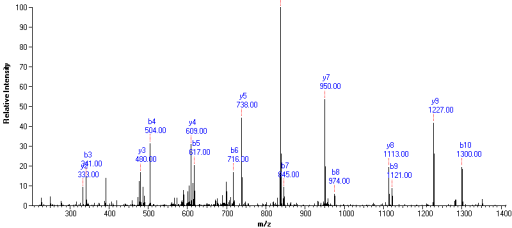

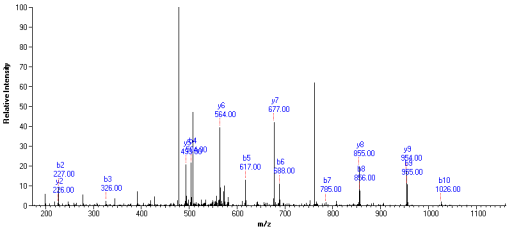

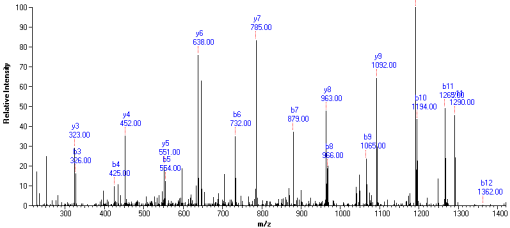

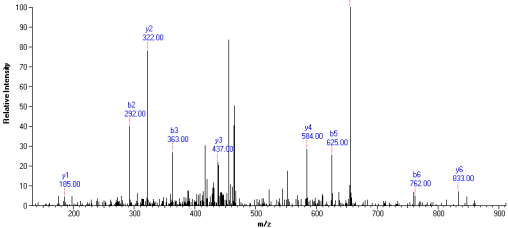

Peptide: **LK(ac)DLDFEVPYSR**\_Charge: 2+  $m/z$ : 739.41\_MassError: 1.5805879ppm\_RetentionTime: 35.072min\_MascotScore: 44.13

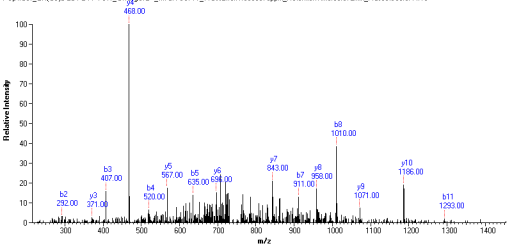



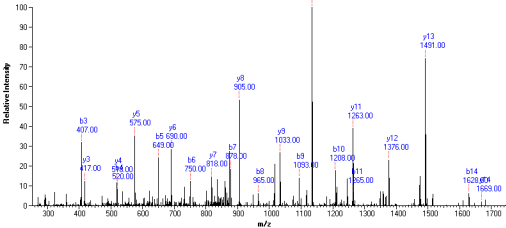

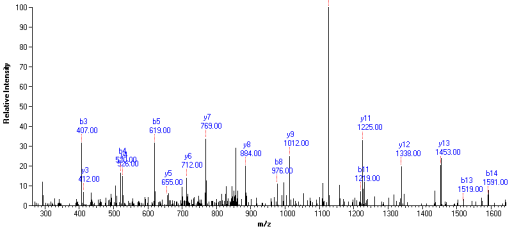

Peptide: \_LK(ac)DPLK(Iy)\_Charge:2+\_m/z: 386.25\_MassError:1.5035943ppm\_RetentionTime:16.283min\_MascotScore:24.58

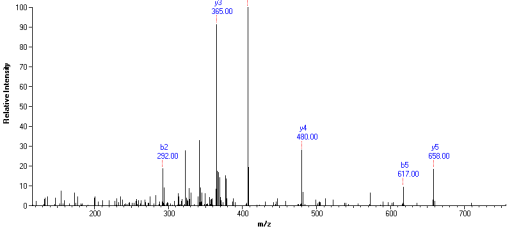

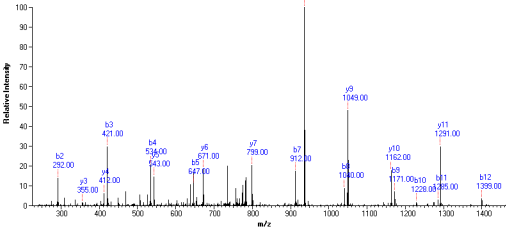

Peptide: \_LK(ac)EITGGK(Iy)\_Charge: 2+\_m/z: 452.28\_MassError: 2.2894996ppm\_RetentionTime: 13.427min\_MascotScore: 28.97

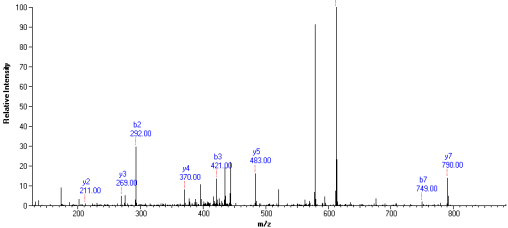

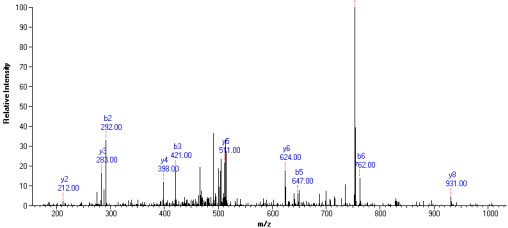

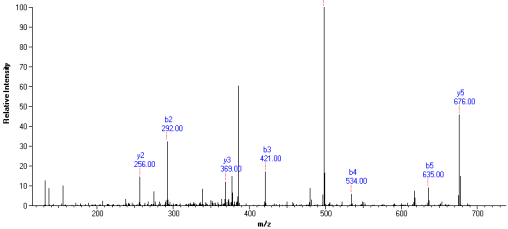

Peptide: \_LK(ac)ELTR\_Charge: 2+\_m/z: 410.26\_MassError: 0.70348804ppm\_RetentionTime: 13.28min\_MascotScore: 40.91

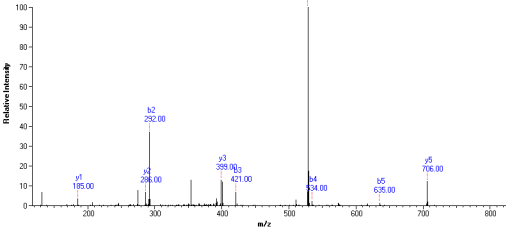



Peptide: \_LK(ac)ENLEALLVALK[ly]\_Charge:2+\_m/z:756.47\_MassError:2.196204ppm\_RetentionTime:50.119min\_MascotScore:68.94

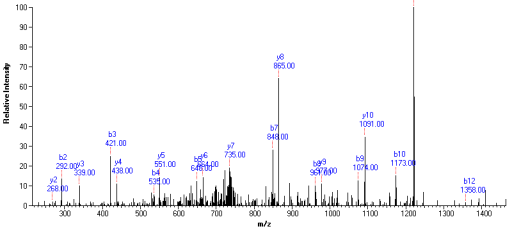

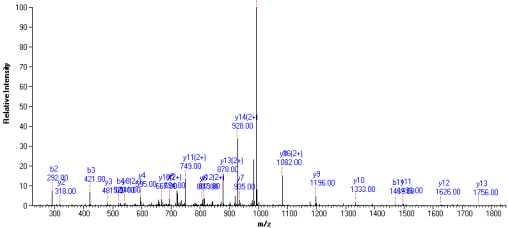

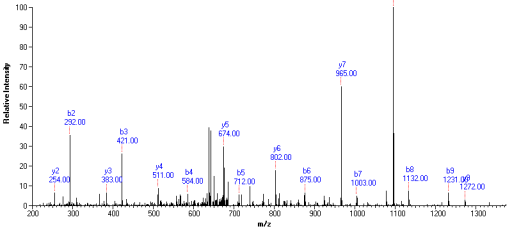

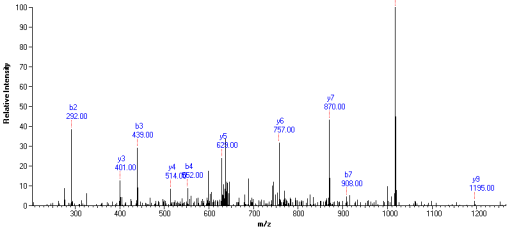

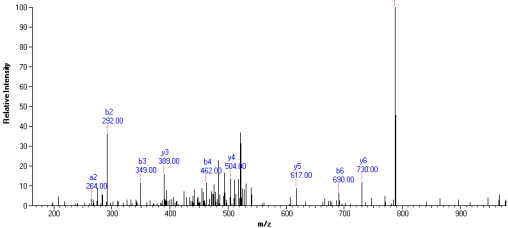

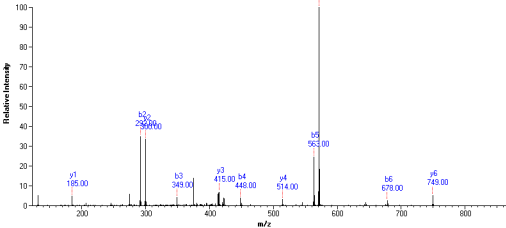

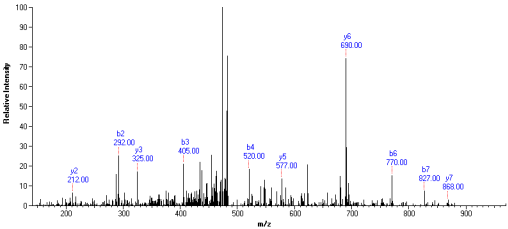

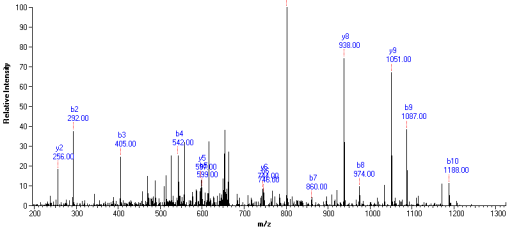



Peptide: \_LK(ac)MMDLISK(Iy)\_Charge: 2+\_m/z: 568.82\_MassError: -1.8837539ppm\_RetentionTime: 30.775min\_MascotScore: 32.74

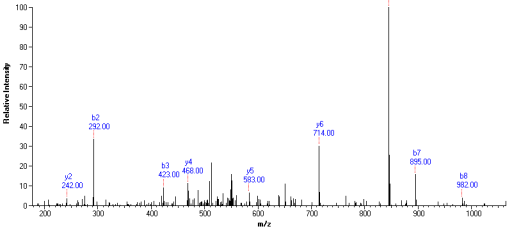

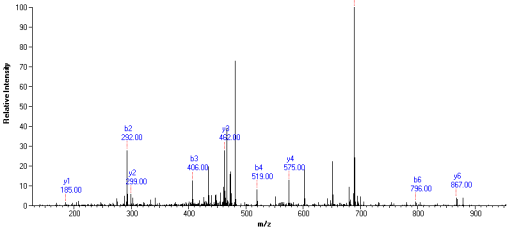

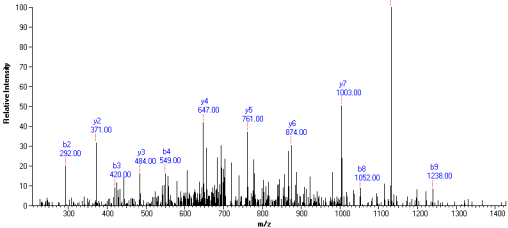

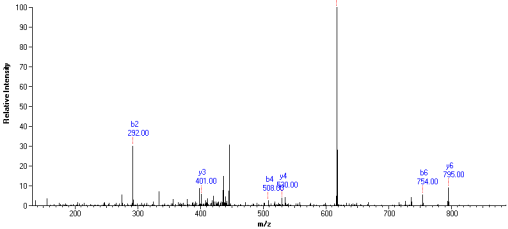

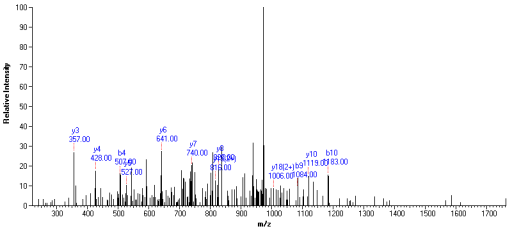

Peptide: \_LK(ac)SLER\_Charge: 2+\_m/z: 403.25\_Mass: Error: 2.269618ppm\_RetentionTime: 13.274min\_MascotScore: 27.43

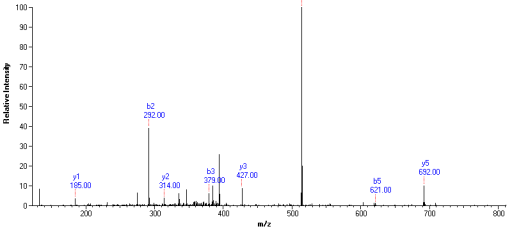

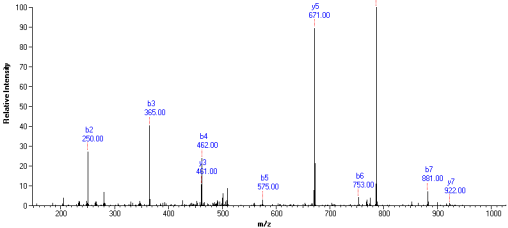

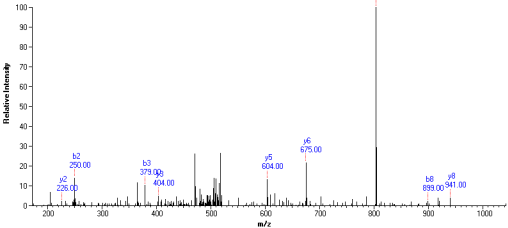



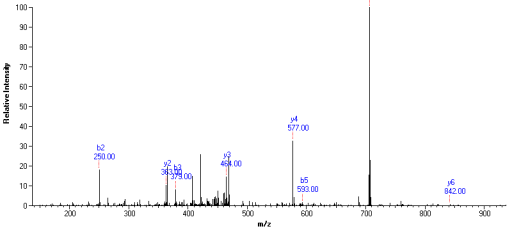

Peptide: \_LK(IY)ENLEALLVALK(ac)K(IY)\_Charge:2+\_m/z: 825.03\_MassError:612.70915ppm\_RetentionTime:44.587min\_MascotScore:111.62

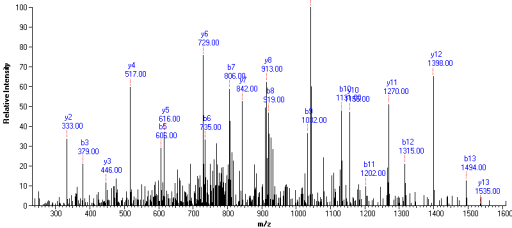

Relative Intensity

100

90

80

70

60

50

40

30

20

10

0

300 400 500 600 700 800 900 1000 1100 1200 1300 1400 1500 1600 1700 1800 1900

m/z

b5  
498.00y9(2+)  
582.00y10(2+)  
639.00y5  
658.00y6  
765.00y7  
885.00y8  
1000.00y18(2+)  
1090.00y19(2+)  
1126.00y9  
1163.00y20(2+)  
1176.00y10  
1276.00y22(2+)  
1286.00y23(2+)  
1322.00y24(2+)  
1388.00y12  
1503.00y15  
1565.00y13  
1617.00y16  
1906.00

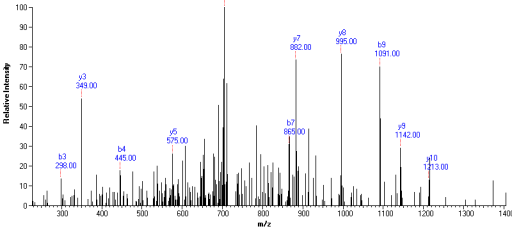

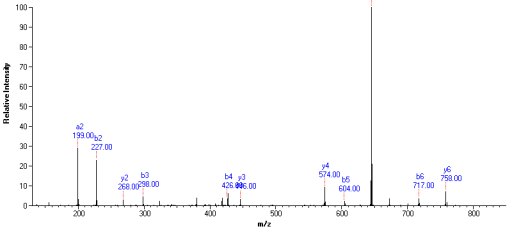

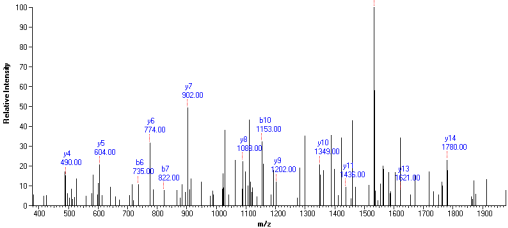

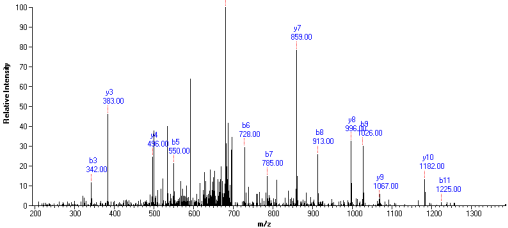

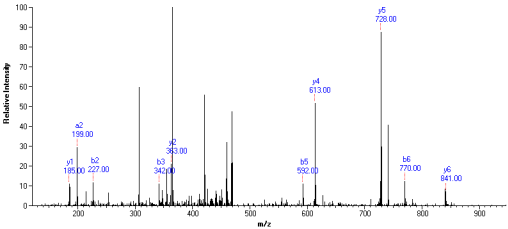



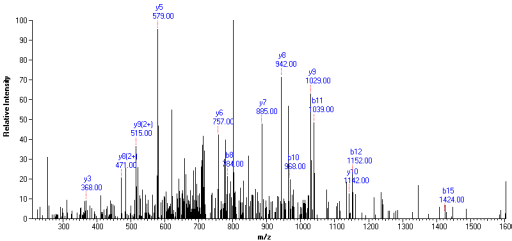

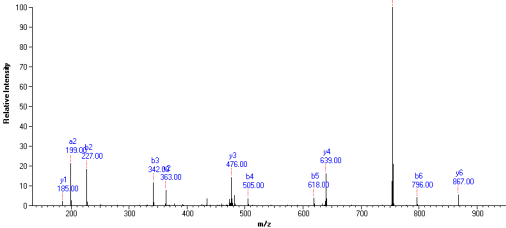

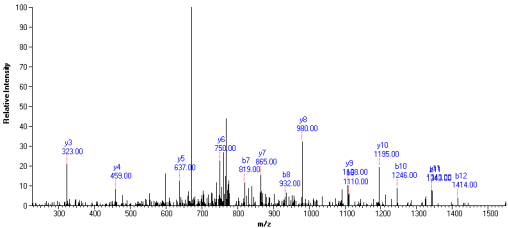

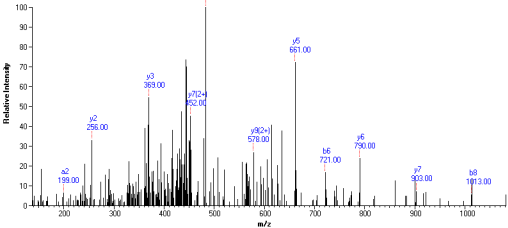

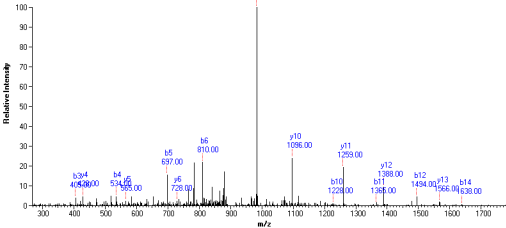

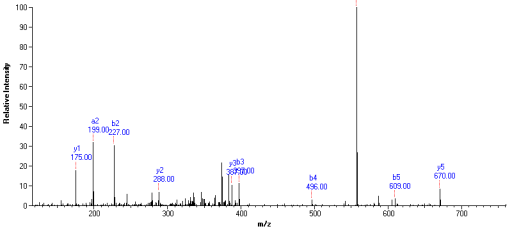

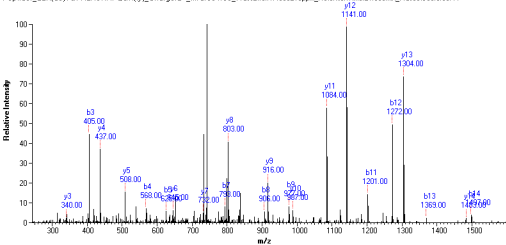

Relative Intensity

100

90

80

70

60

50

40

30

20

10

0

m/z

b3  
340.00b4  
438.00y4  
454.00y5  
541.00b5  
617.00b6  
732.00y7  
782.00b7  
845.00y8  
897.00b8  
960.00y9  
1010.00b9  
1073.00y10  
1125.00b10  
1201.00b11  
1298.00y11  
1303.00y12  
1402.00b12  
1487.00y13  
1515.00



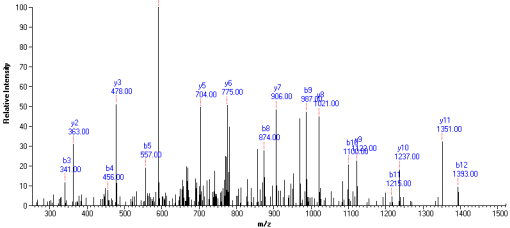

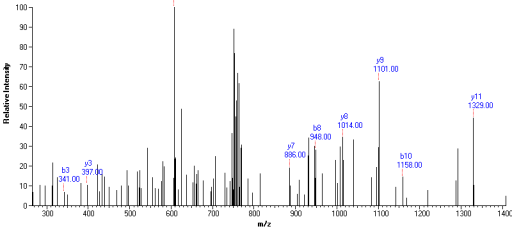

Peptide: LLNLQTYFTAGYK(jac)EVR\_Charge: 3+\_m/z: 638.03\_MassError: 2.0952397ppm\_RetentionTime: 40.329min\_MascotScore: 43.13

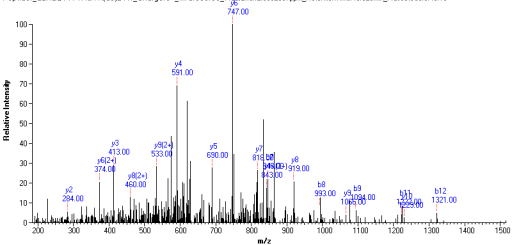

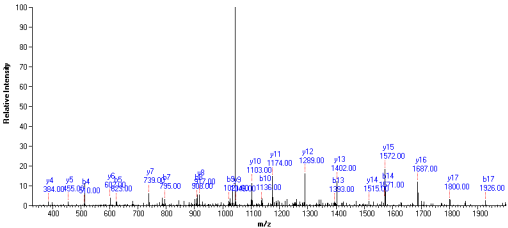

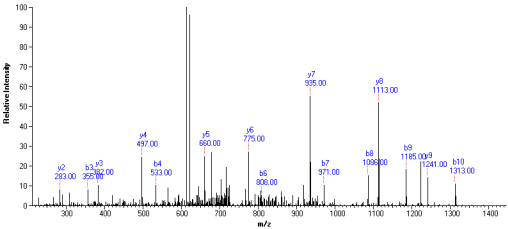

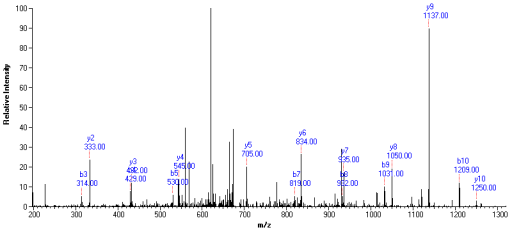

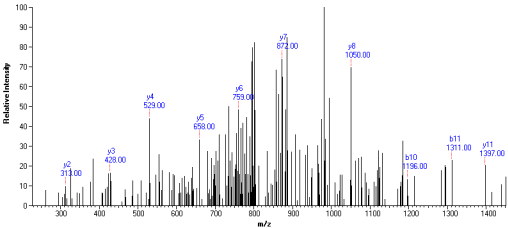

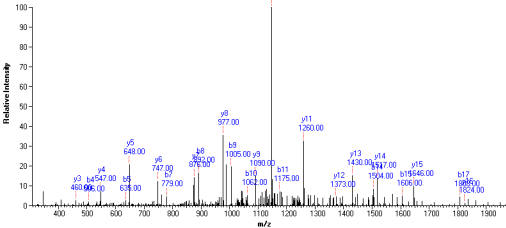



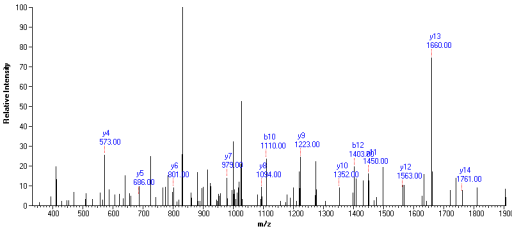

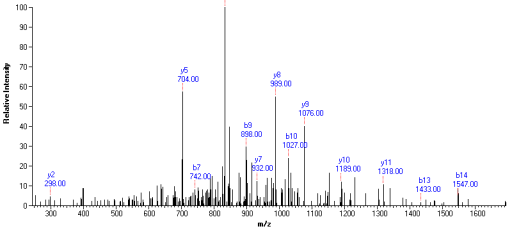

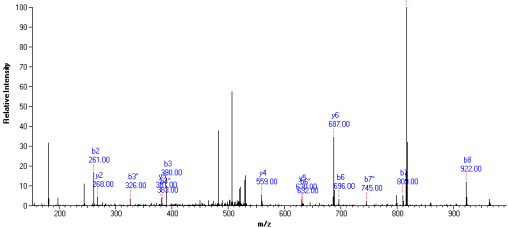

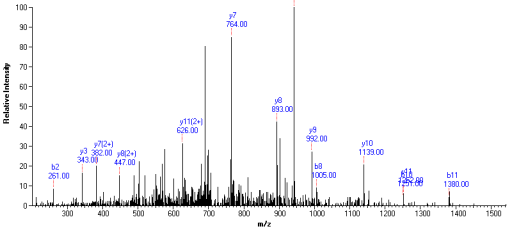

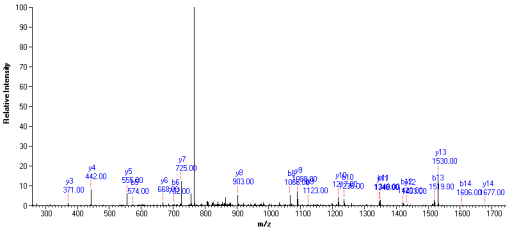

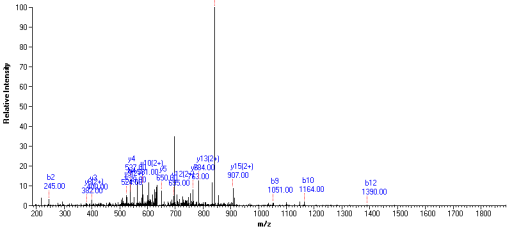

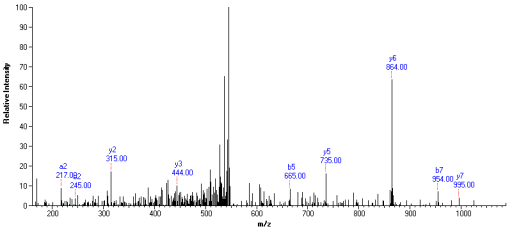

Peptide: \_LMK(ac)TAGAYWR\_Charge: 2+\_m/z: 628.83\_MassError: 0.33089071ppm\_RetentionTime: 22.367min\_MascotScore: 45.02

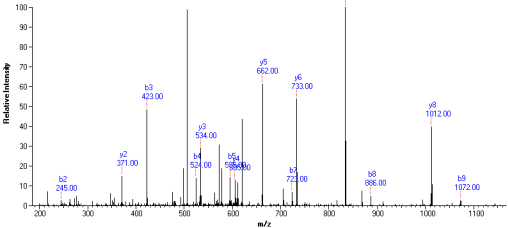



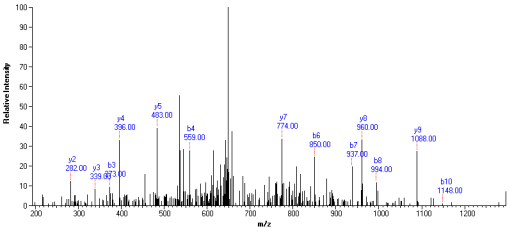

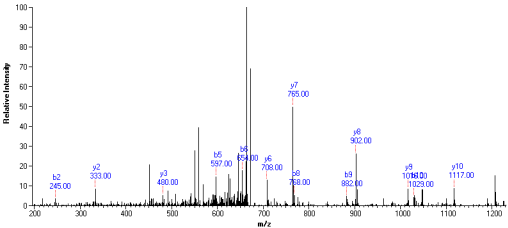

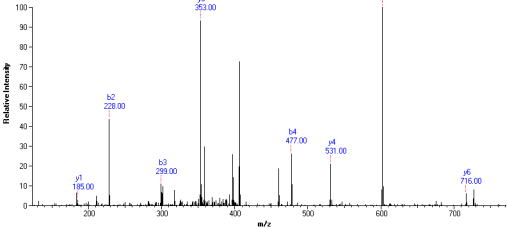

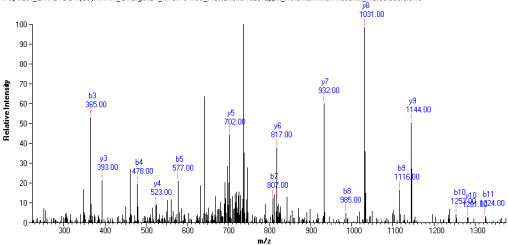

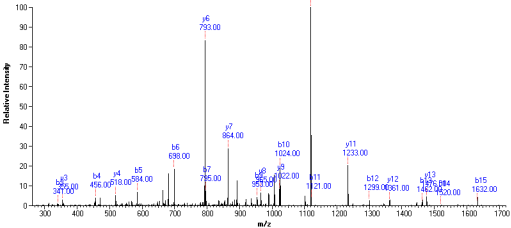

Peptide: \_LNK(ac)AGYEAWLVGGGYR\_Charge: 2+\_m/z: 875.48\_MassError: 1.5867026ppm\_RetentionTime: 39.432min\_MascotScore: 67.53

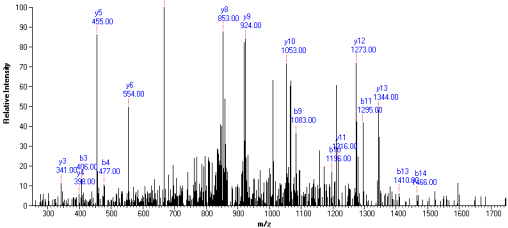

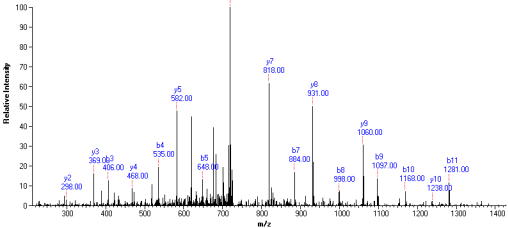

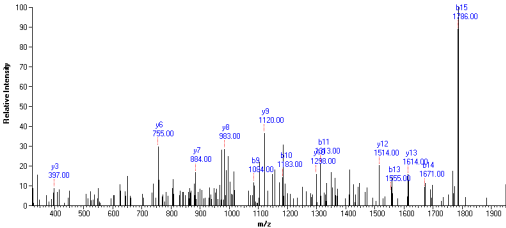



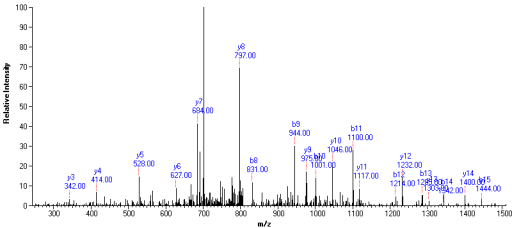

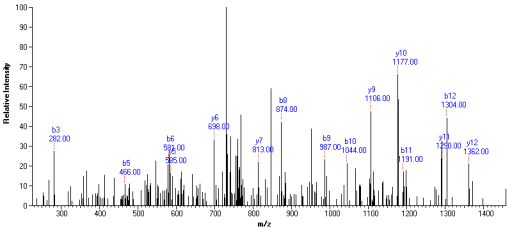

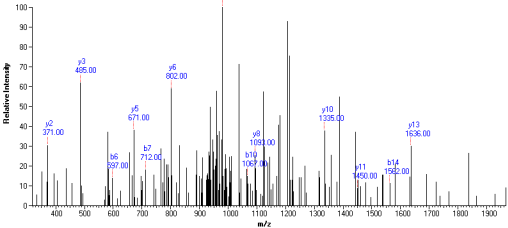

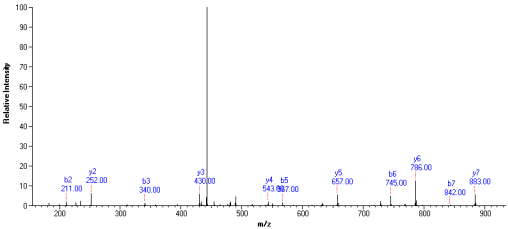

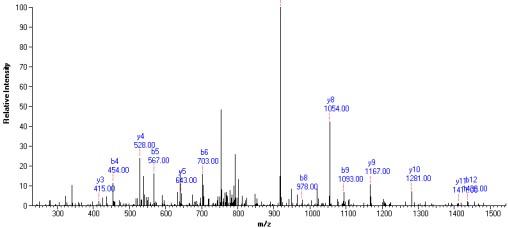

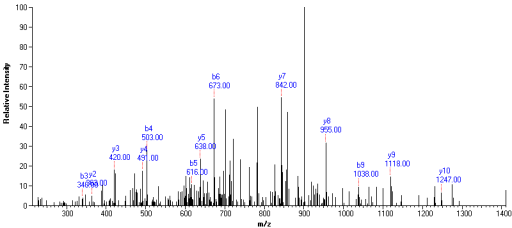

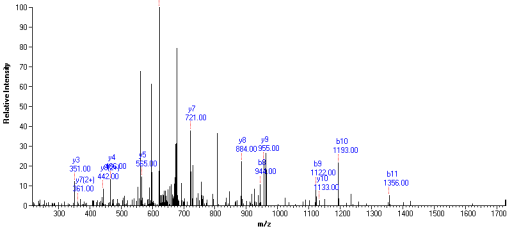

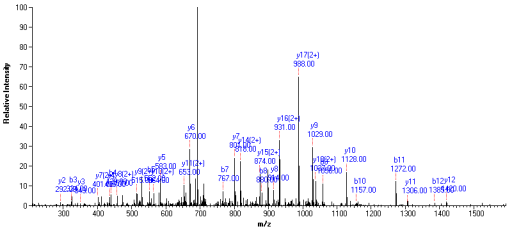



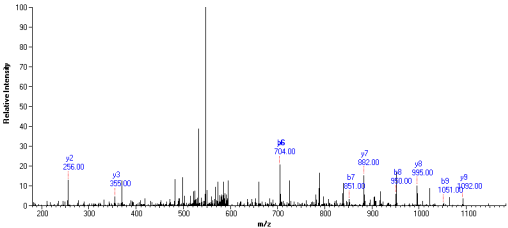

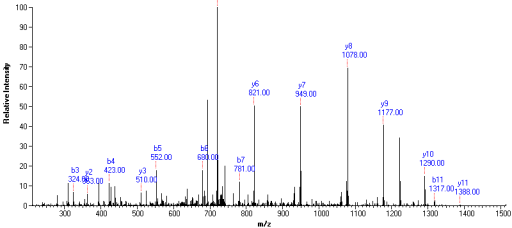

Peptide: \_LPK(ac)DYK(Iy)\_Charge: 2+\_m/z: 379.24\_MassError: 3.4483309ppm\_RetentionTime: 11.534min\_MascotScore: 23.76

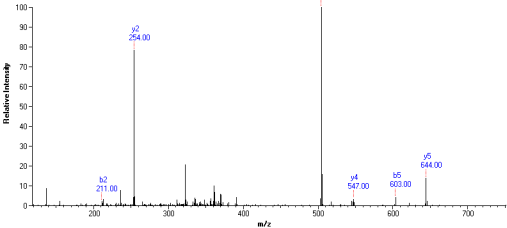

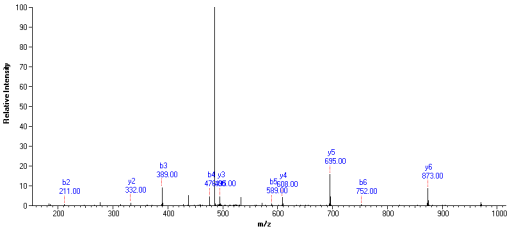

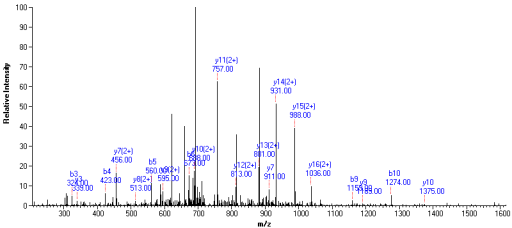

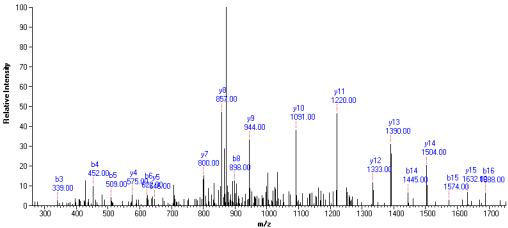

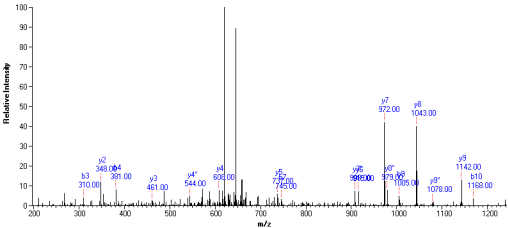

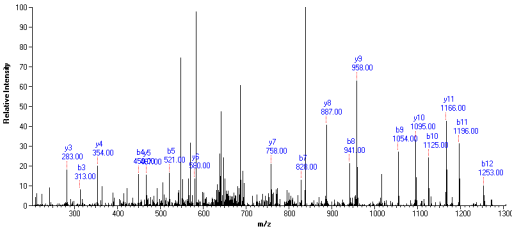



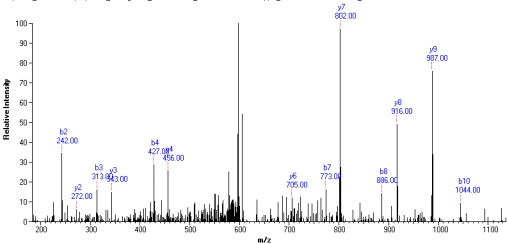

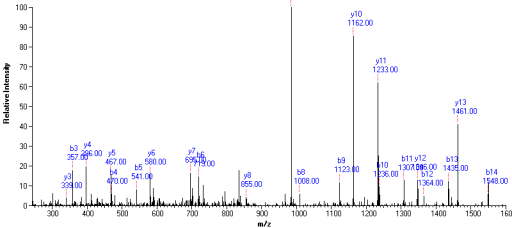

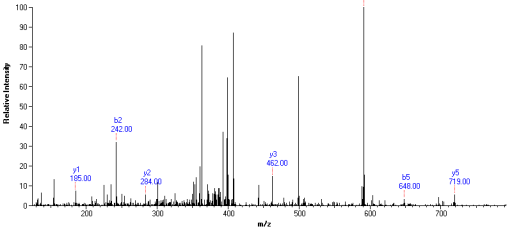

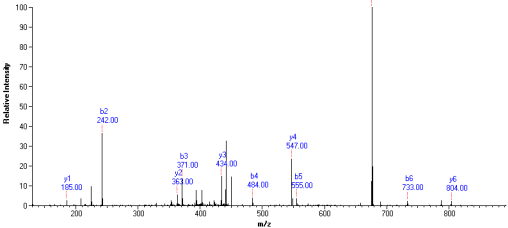

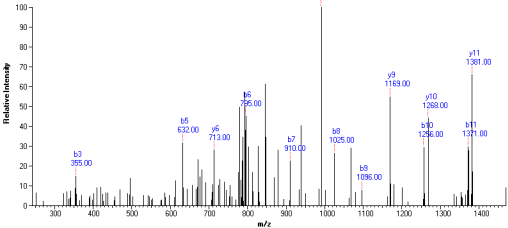

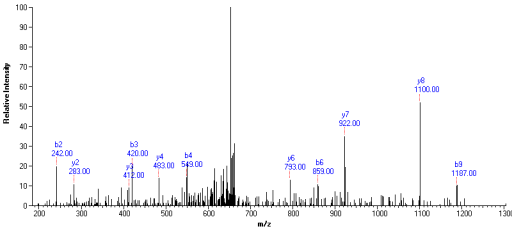

Peptide: \_LQLK(ac)YR\_Charge: 2+\_m/z: 440.77\_MassError: 1.0702586ppm\_RetentionTime: 15.53min\_MassotScore: 36.48

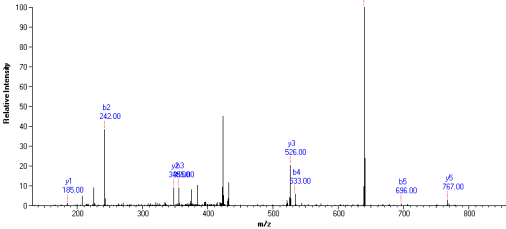

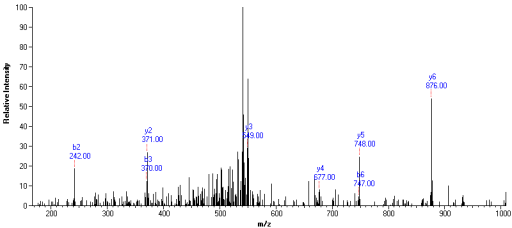



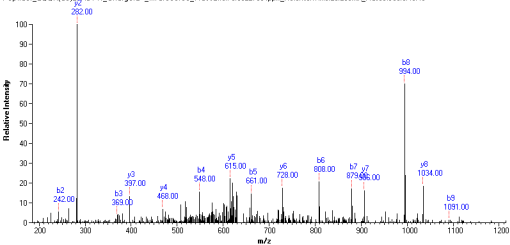

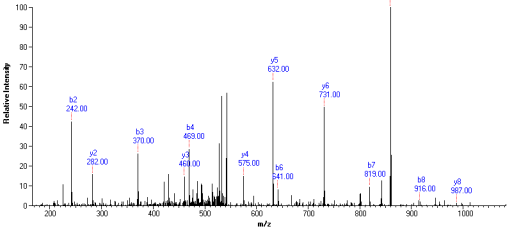

Peptide: LQVEAIK(ac)R\_Charge: 2+\_m/z: 508.81\_MassError: 0.54062078ppm\_RetentionTime: 19.563min\_MascotScore: 39.52

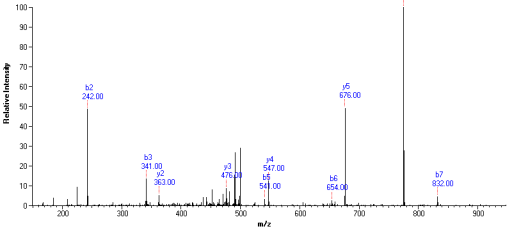

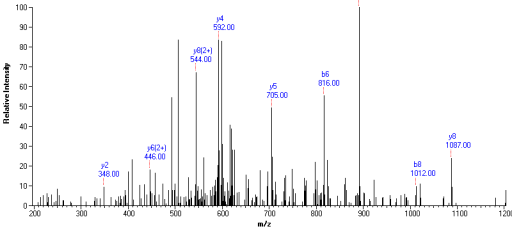

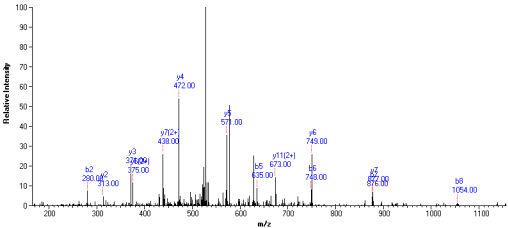

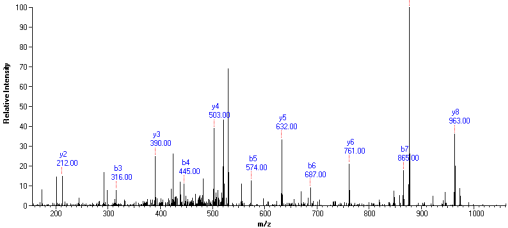

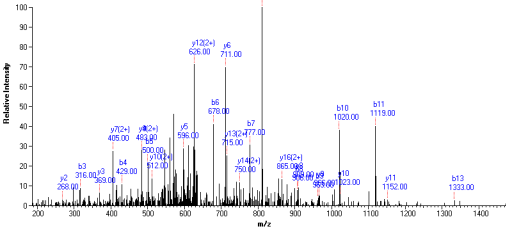

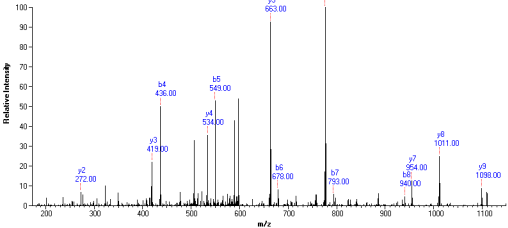



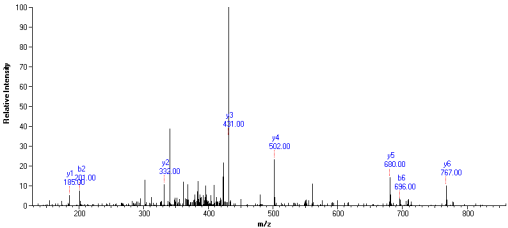

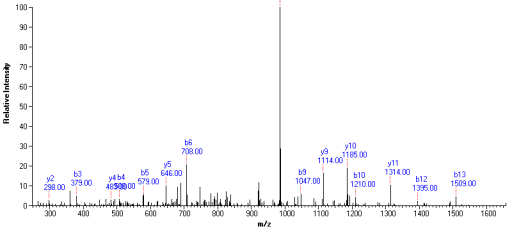

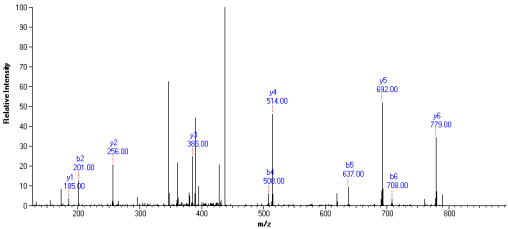

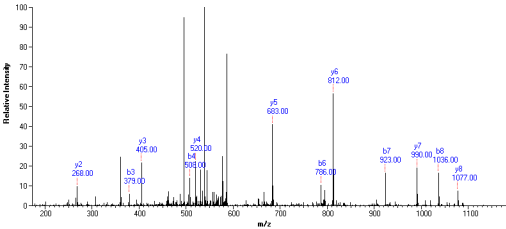

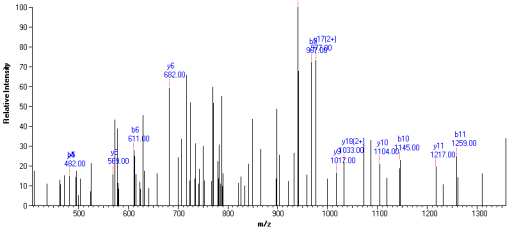

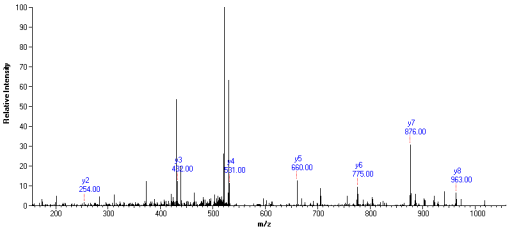

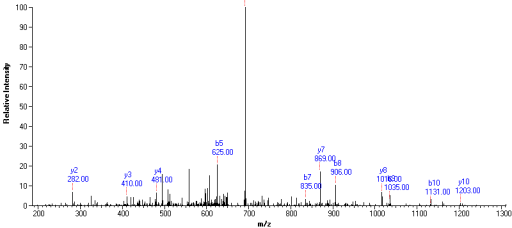

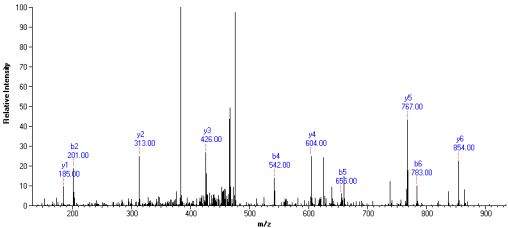



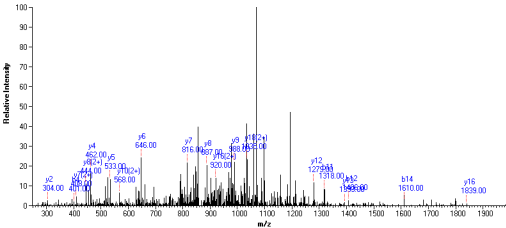

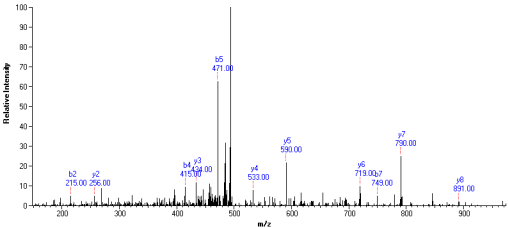

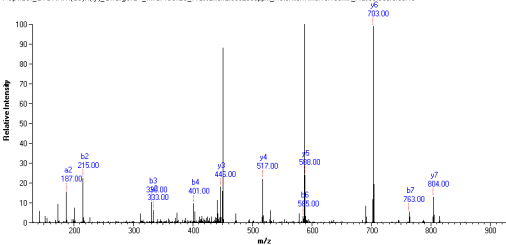

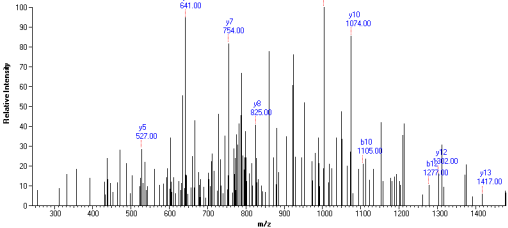

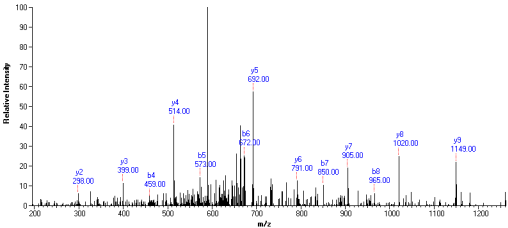

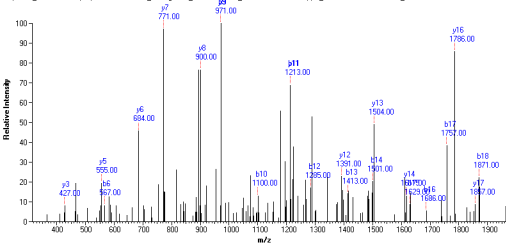

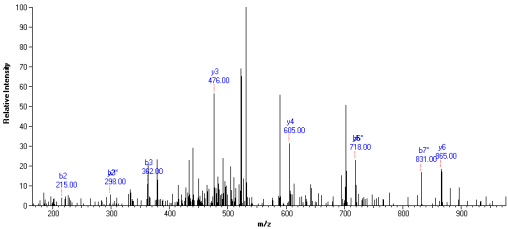

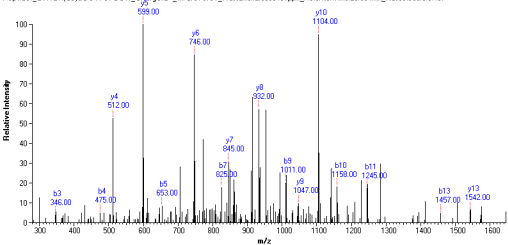



Peptide: **\_LTQPEWFGWSQEK(ac)R** Charge: 2+  $m/z$ : 926.46\_MassError: 0.10581639ppm\_RetentionTime: 38.827min\_MascotScore: 42.73

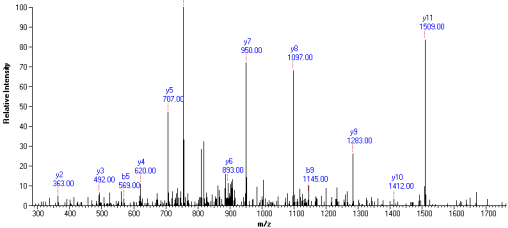

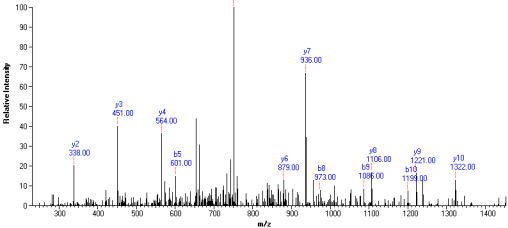

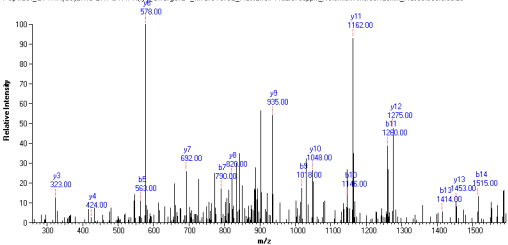

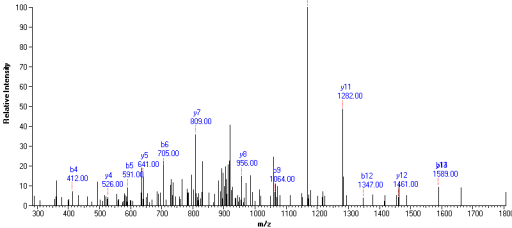

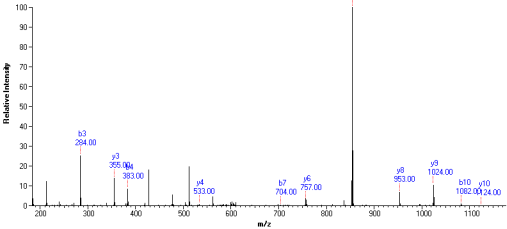

Peptide: LVDEAK(ac)AR\_Charge: 2+\_m/z: 481.28\_MassError: 1.3885314ppm\_RetentionTime: 12.243min\_MascotScore: 37.77

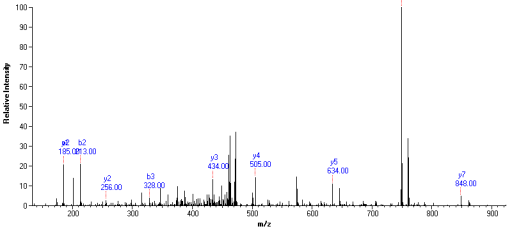

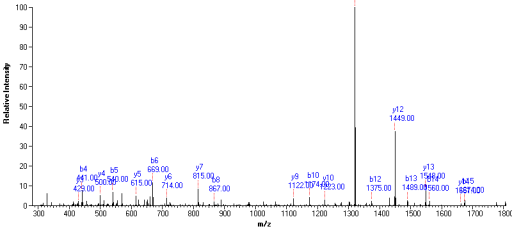

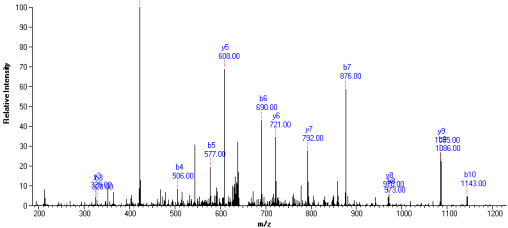



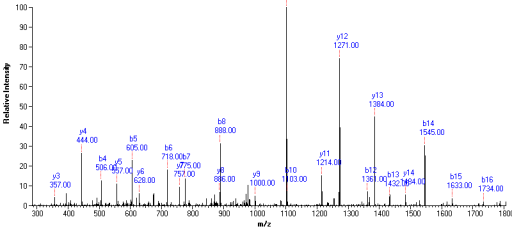

Peptide: \_LVEEK(ac)R\_Charge: 2+\_m/z: 417.25\_MassError: 2.0556064ppm\_RetentionTime: 9.9044min\_MaxcotScore: 54.29

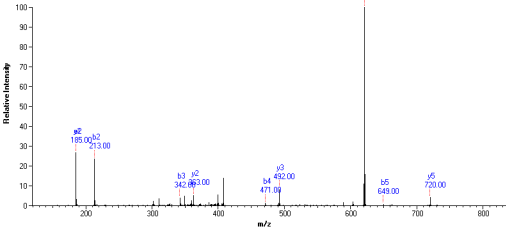

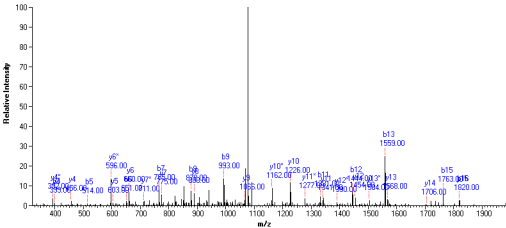

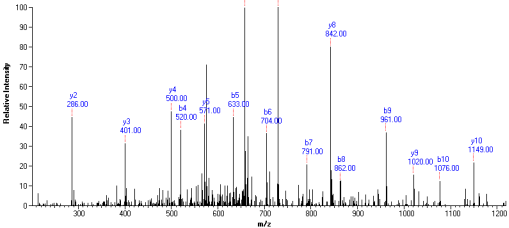

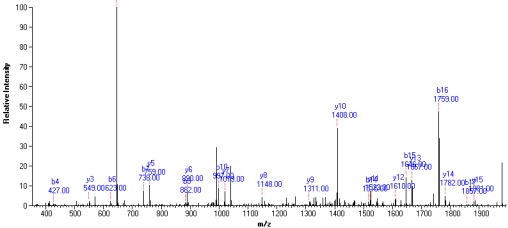

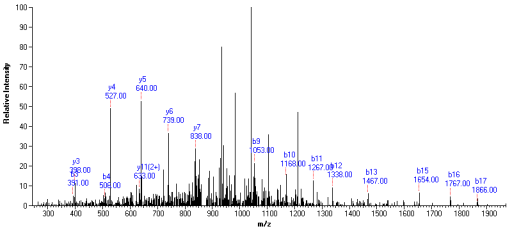

Peptide: \_LVK(ac)PWYGGYTGK(<sup>ly</sup>\_Charge: 2+\_m/z: 681.89\_MassError: 1.6350391ppm\_RetentionTime: 30.319min\_MassotScore: 27.11

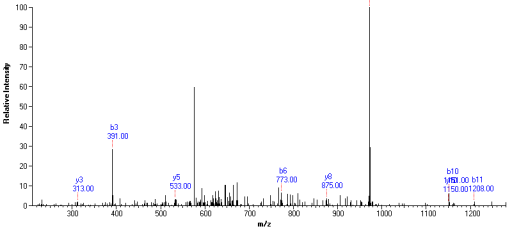

Peptide: \_LVK(IY)PWVGGYTGK(Ac)DPLDNTYTR\_Charge: 3+\_m/z: 816.76\_MassError: 1.1209304ppm\_RetentionTime: 34.132min\_MascotScore: 21.44

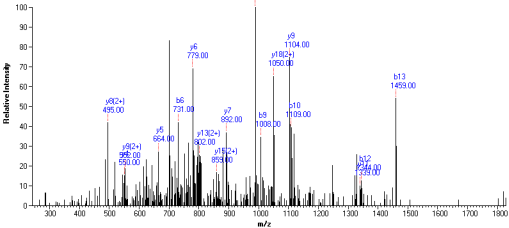



Peptide: LVLGK(ac)EVR\_Charge: 2+\_m/z: 487.31\_MassError: -0.2439607ppm\_RetentionTime: 21.748min\_MascotScore: 34.73

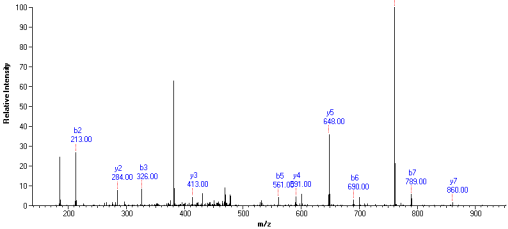

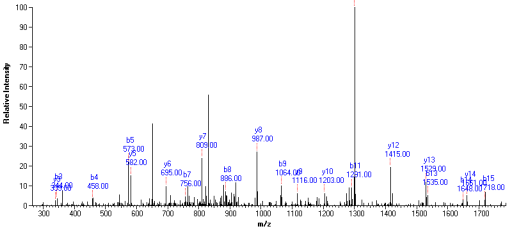

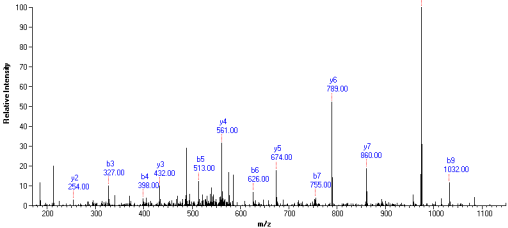

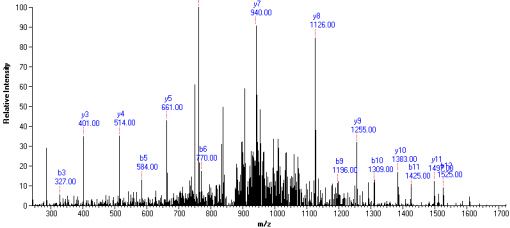

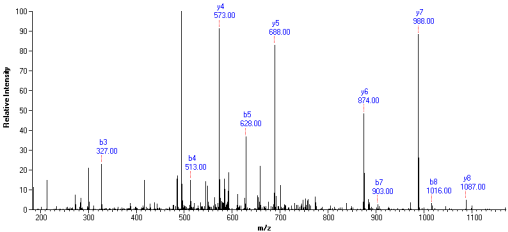

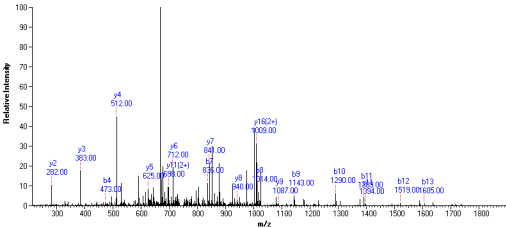

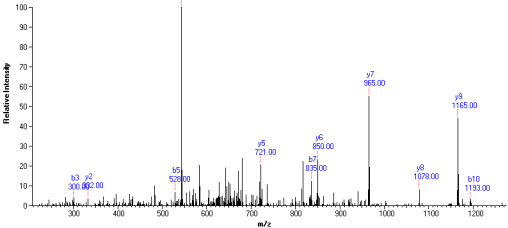

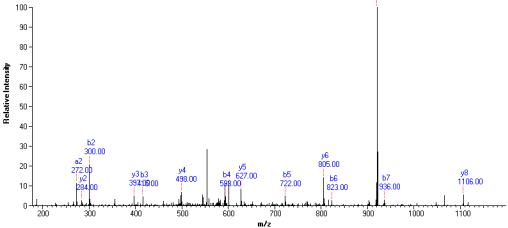



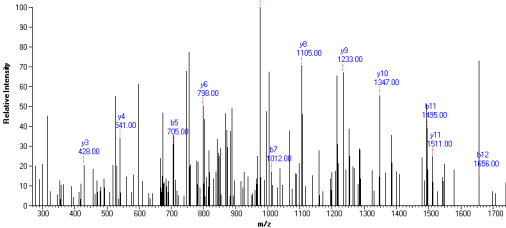

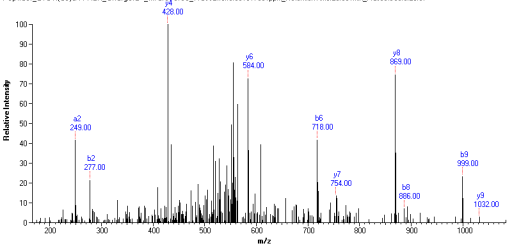

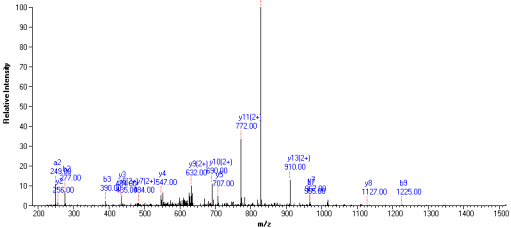

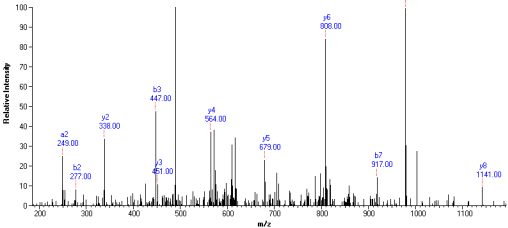

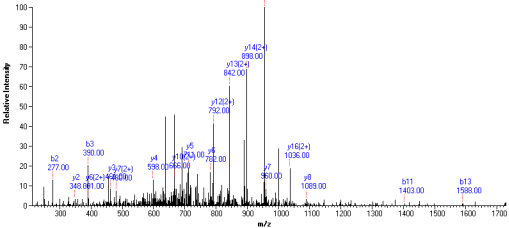

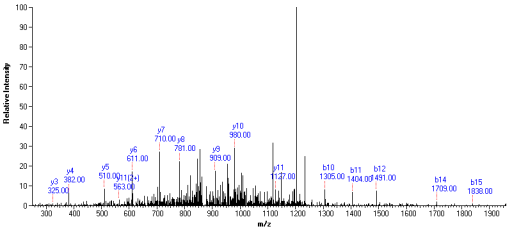

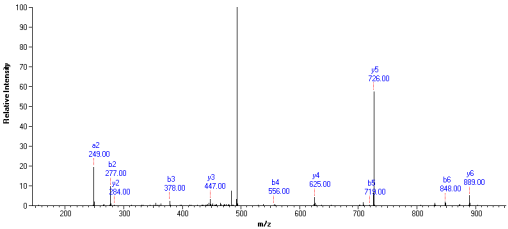

Peptide: **M(ox)AENPQQVLDLFLDLAK(ac)R**\_Charge: 3+\_m/z: 722.37\_MassError: 1.9629248ppm\_RetentionTime: 51.511min\_MascotScore: 57.4

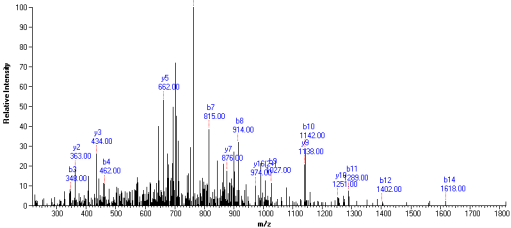



Peptide: **M(ox)DQTYLSLE SFLNHVQK** | **ac** | **R** | Charge: 3+ | **m/z**: 725.02 | **MassError**: 1.8190219 | **Sppm**: RetentionTime: 39.54min | **MascotScore**: 46.27

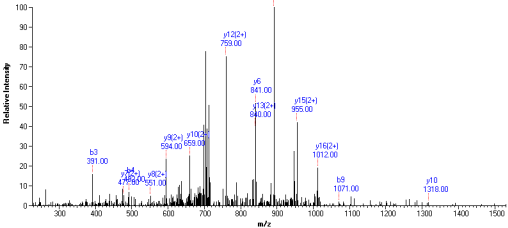

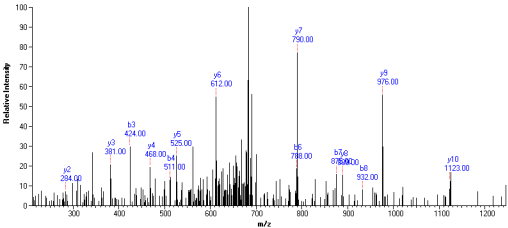

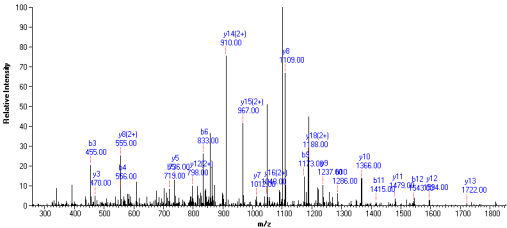

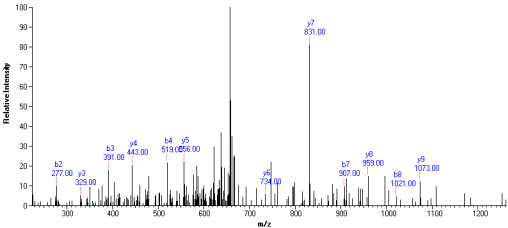

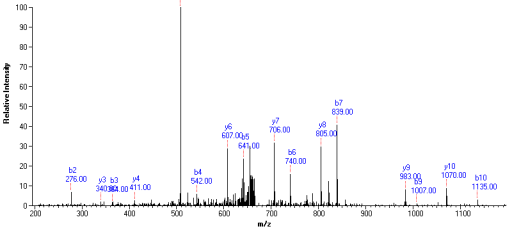

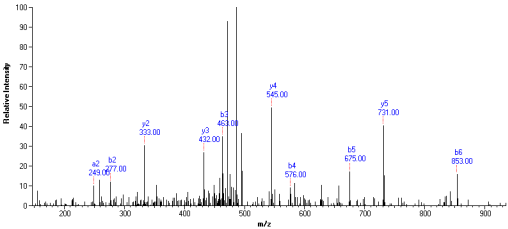

Peptide: **M(ox)GANFLK(ac)IVYNGIK**[y]<sub>2+</sub> **m/z: 768.43** **MassError: 0.7910293** **ppm** **RetentionTime: 33.153** **min** **MascotScore: 96.46**

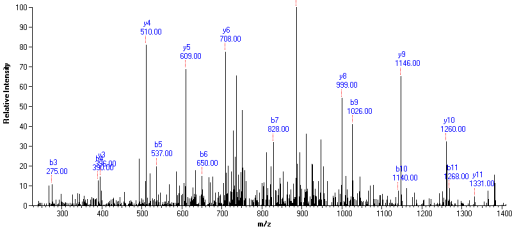

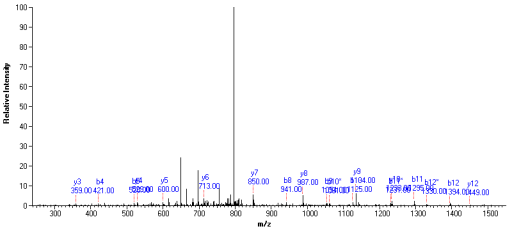



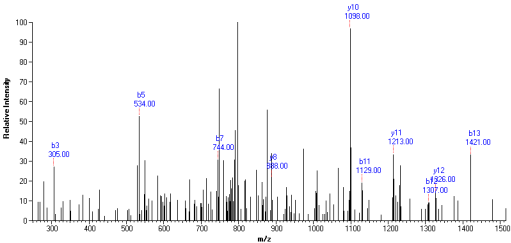

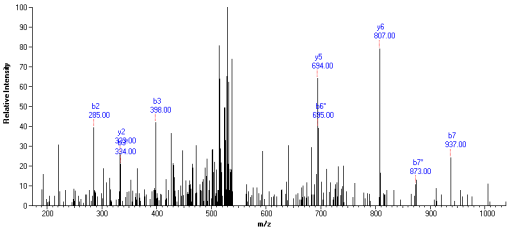

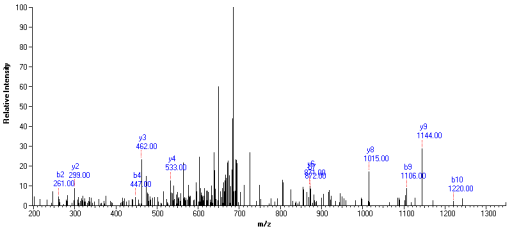

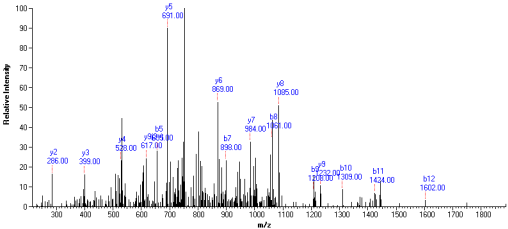

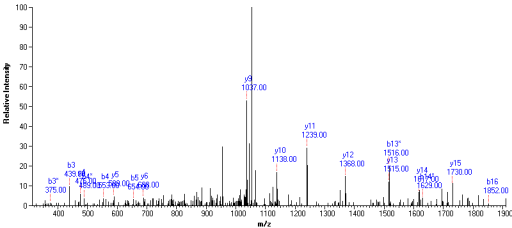

Peptide: **M(ox)K(ac)EGQEK**(ly)IYYITADSYAAAK(ly)\_Charge: 3+\_m/z: 788.4\_MassError: 3.2649953ppm\_RetentionTime: 30.128min\_MascotScore: 47.95

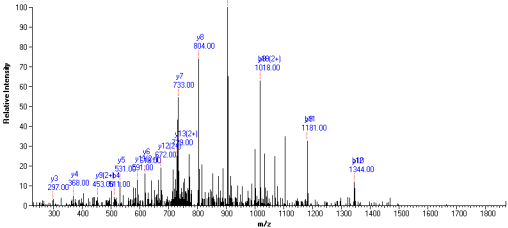

Peptide: \_M(ox)K(ac)FSELWLR\_Charge:2+\_m/z: 643.34\_MassError:0.85578064ppm\_RetentionTime:37.068min\_MascotScore:44.26

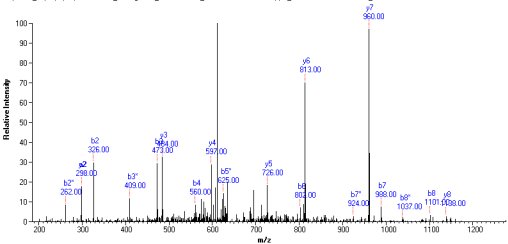

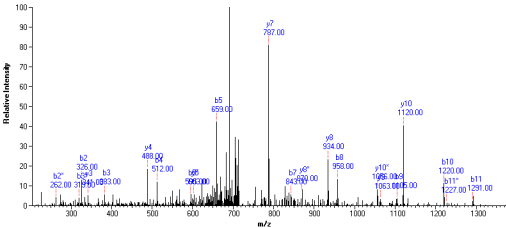



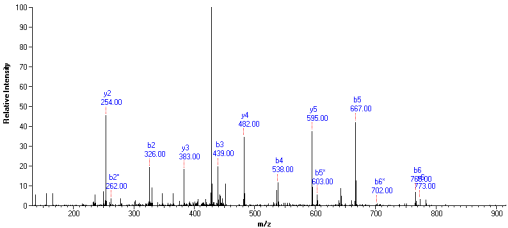

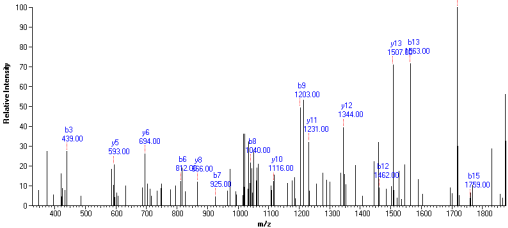

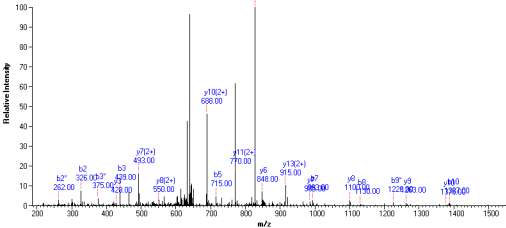

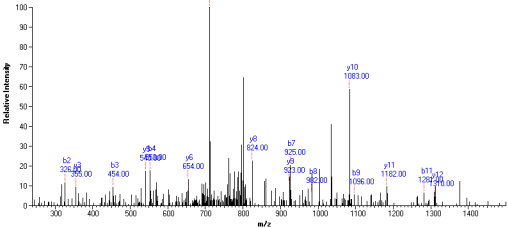

Peptide: **M(ox)K(ac)TIEVDDEL<sup>Y</sup>SYIASHTK(I<sub>y</sub>)**\_Charge:3+\_m/z:773.71\_MassError:2.6521392ppm\_RetentionTime:41.398min\_MascotScore:25.45

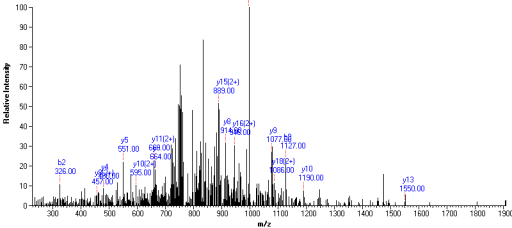

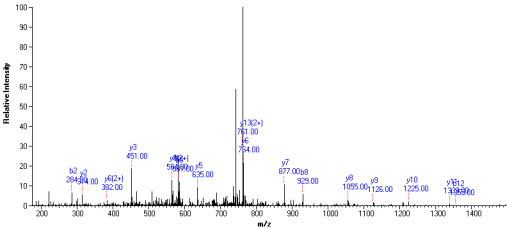

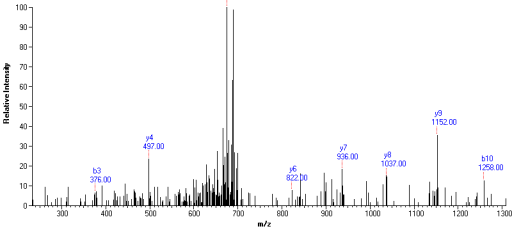

Peptide: **M(ox)LEM(ox)GLNK(ac)EDYWVYR**\_Charge: 2+\_m/z: 1063.48\_MassError: -1362.8407ppm\_RetentionTime: 40.795min\_MascotScore: 56.82

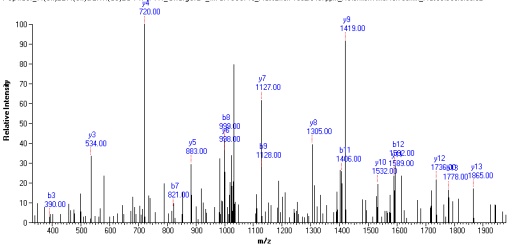



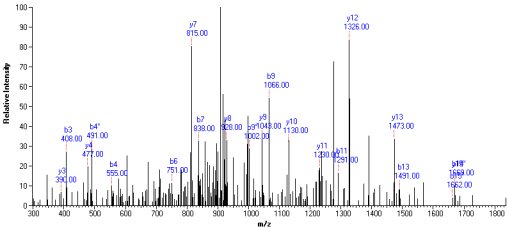

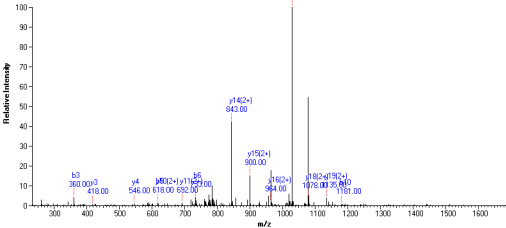

Peptide: **M(ox)NFEQK(ac)IALVTGASR**, Charge: 2+,  $m/z$ : 835.44, MassError: 1221.6481ppm, RetentionTime: 39.446min, MascotScore: 44.86

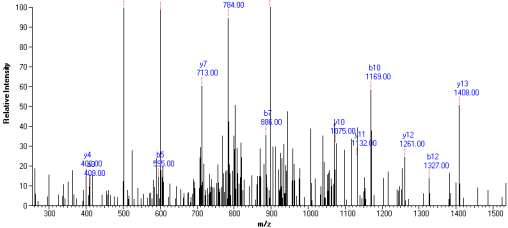

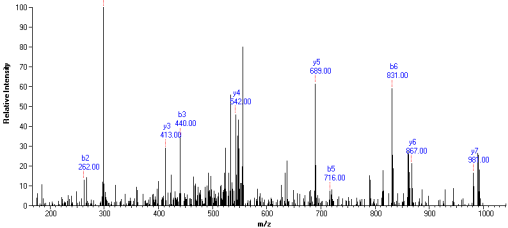

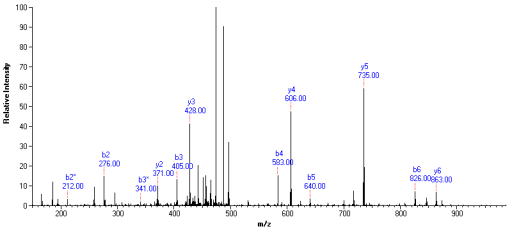

Peptide: **M(ox)QVGPK(ac)SEPIK(Iy)**\_Charge: 2+\_m/z: 644.35\_MassError: 2.5844637ppm\_RetentionTime: 15.717min\_MascotScore: 40.43

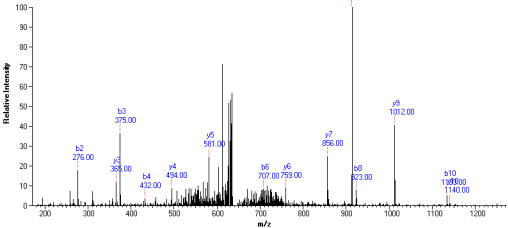

Peptide: **M(ox)SELQYGGK(ac)IPELEK**[y]<sub>2</sub><sup>+</sup> **m/z**: 869.95 **MassError**: -1703.302ppm **RetentionTime**: 31.425min **MascotScore**: 49.54

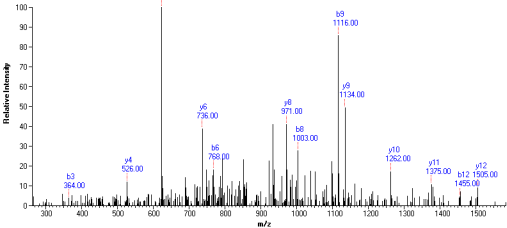

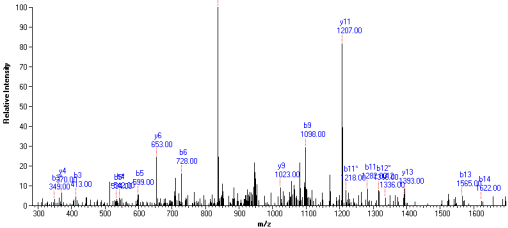



Peptide: **M(ox)TGIVK(ac)WFNADK** (y)  
Charge: 2+  
m/z: 742.38  
MassError: -1.1718029ppm  
RetentionTime: 34.965min  
MascotScore: 51.63

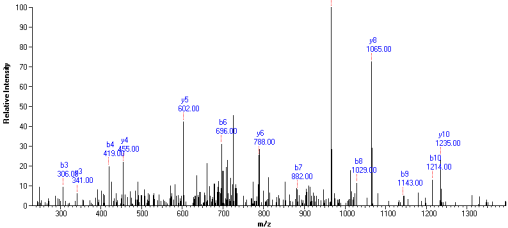

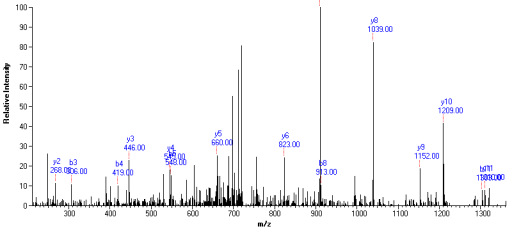

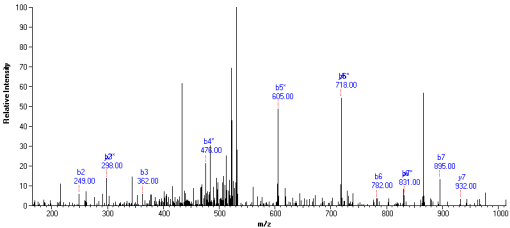

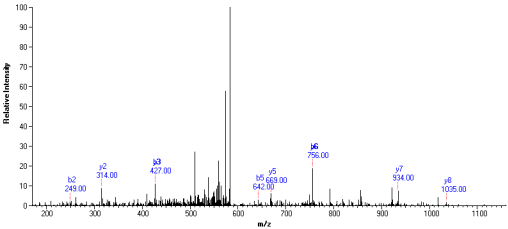

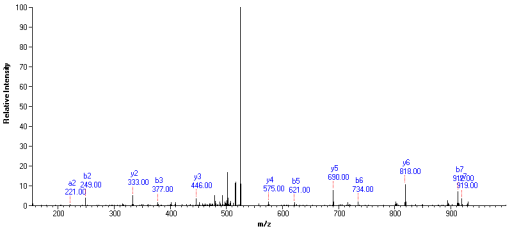

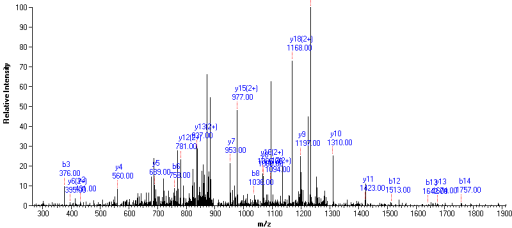

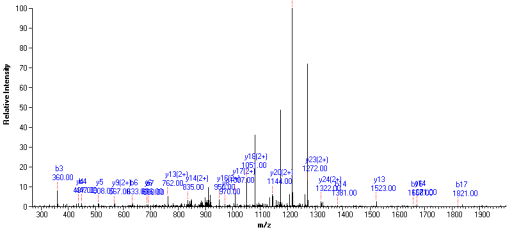

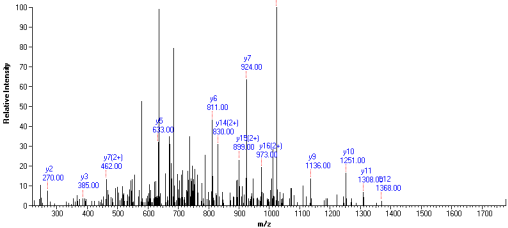



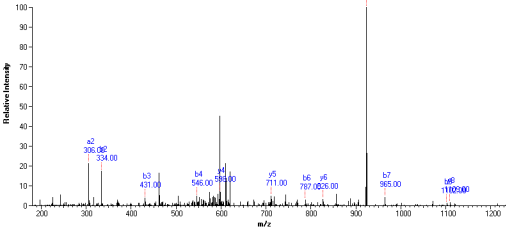

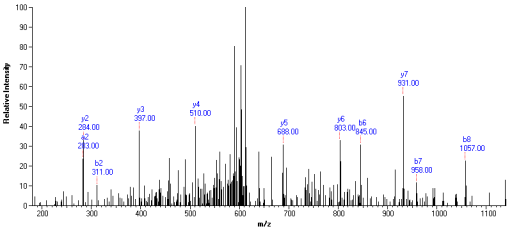

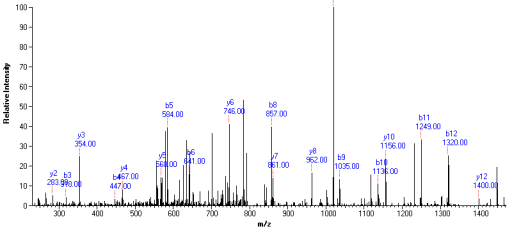

Peptide: \_MAEANK(ac)AFAHYR\_Charge: 2+\_m/z: 734.86\_MassError: 1.9491093ppm\_RetentionTime: 13.661min\_MascotScore: 80.78

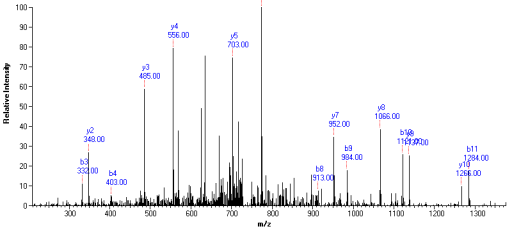

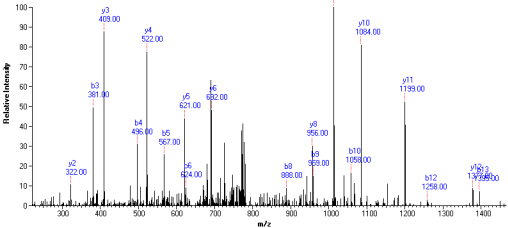

Peptide: \_MALELFK(ac)PFIYGK(Iy)\_Charge:2+\_m/z:807.95\_MassError:2.7424284ppm\_RetentionTime:45.926min\_MascotScore:56.95

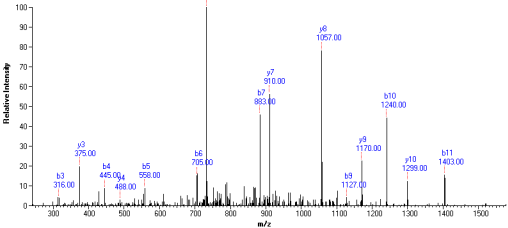

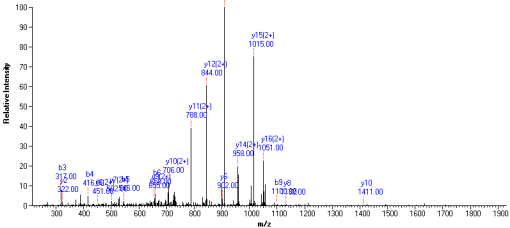

Peptide: \_MAPPGISAQVLEK(ac)K[ly]\_ Charge: 3+ m/z: 490.62\_MassError:1.0457975ppm\_RetentionTime:25.076min\_MascotScore:27.02

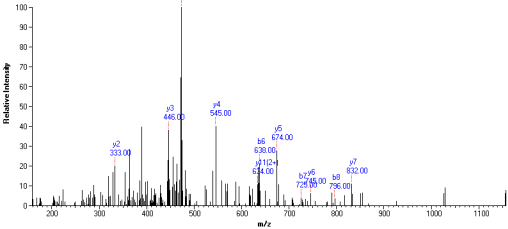



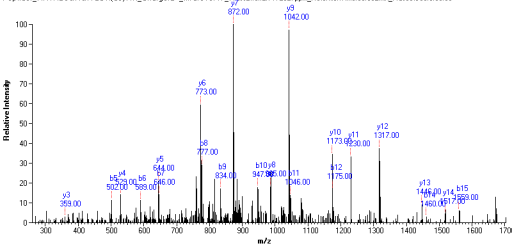

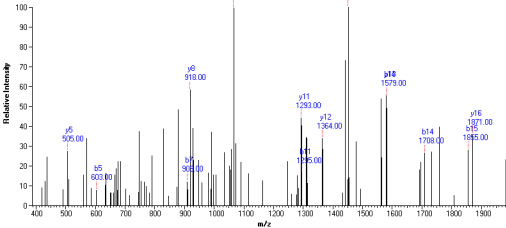

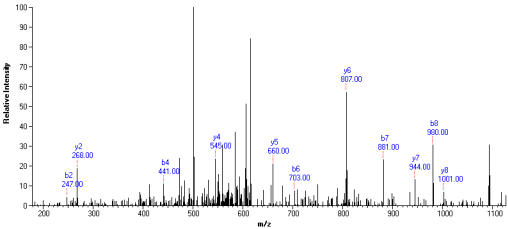

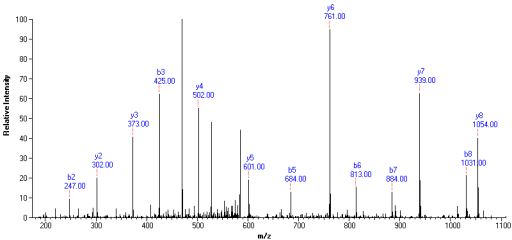

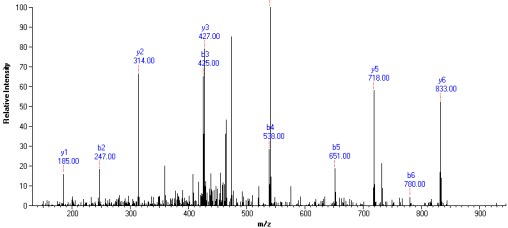

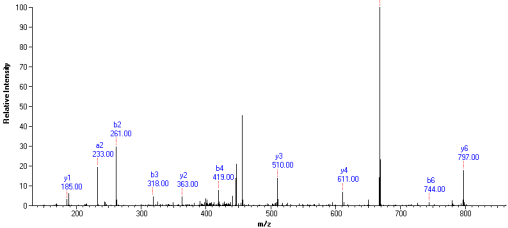

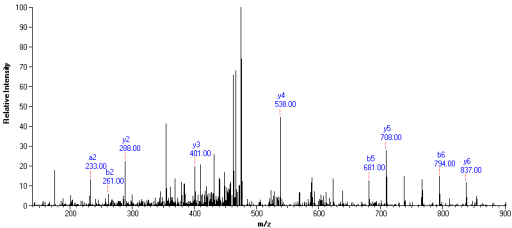

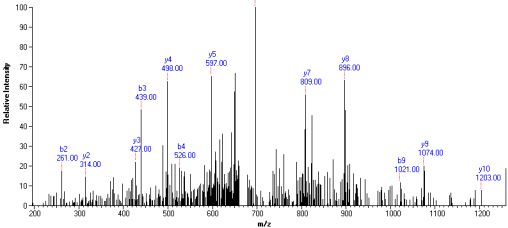



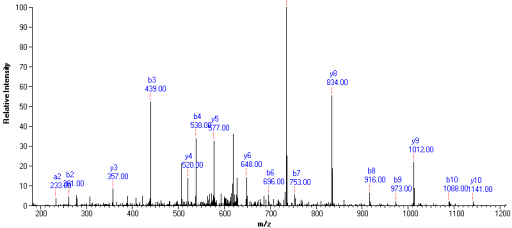

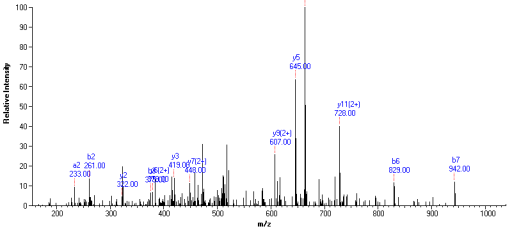

Peptide: METIAK(ac)HR\_Charge:2+\_m/z:523.28\_MassError:-0.25893664ppm\_RetentionTime:10.862min\_MaxcofScore:44.19

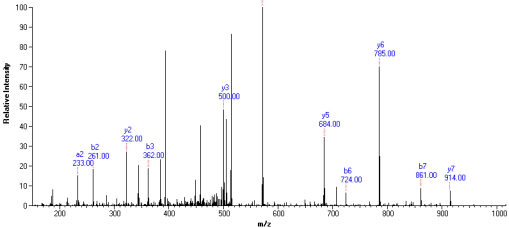

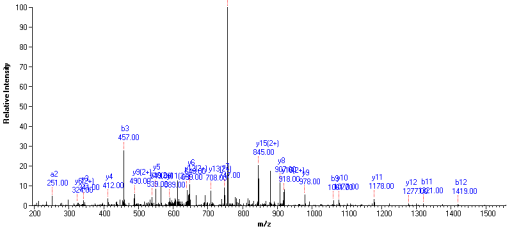

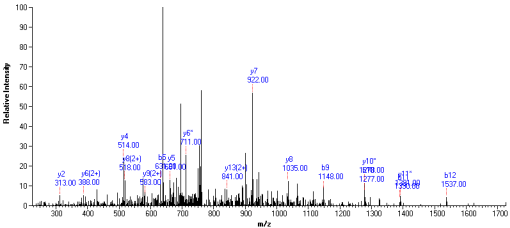

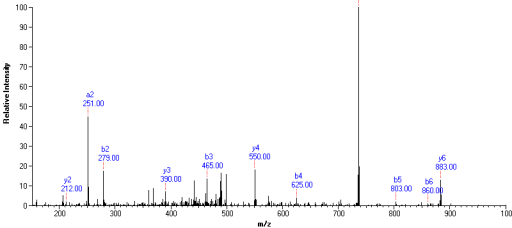

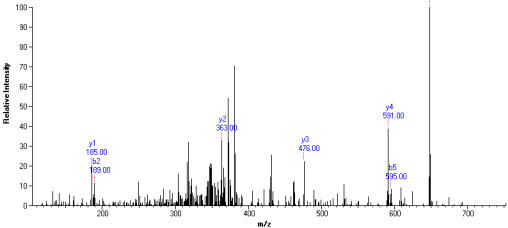

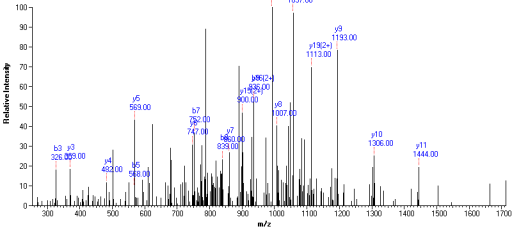



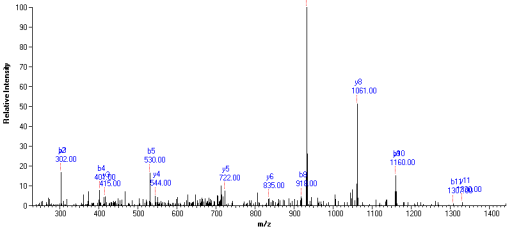

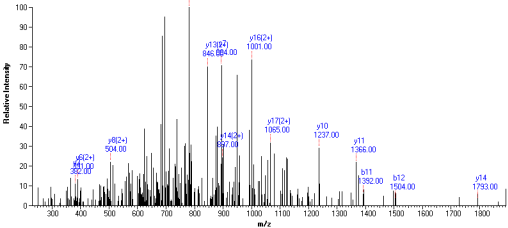

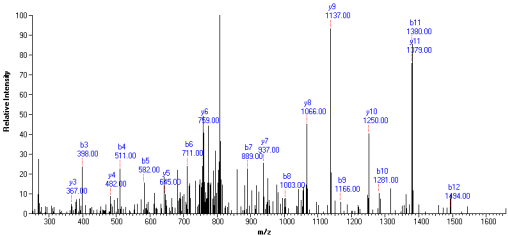

Peptide: \_MIEFK(ac)NYSK(Iy)\_Charge: 2+\_m/z: 577.32\_MassError: 1.100803ppm\_RetentionTime: 20.471min\_MascotScore: 35.14

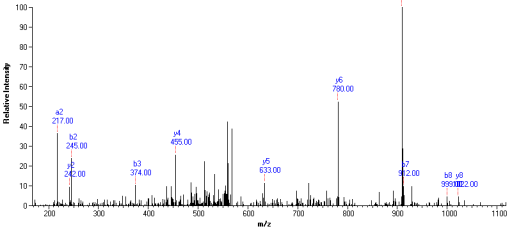

Peptide: \_MIEK(ac)LR\_Charge: 2+\_m/z: 425.25\_MassError: 2.0856694ppm\_RetentionTime: 12.761min\_MascotScore: 31.24

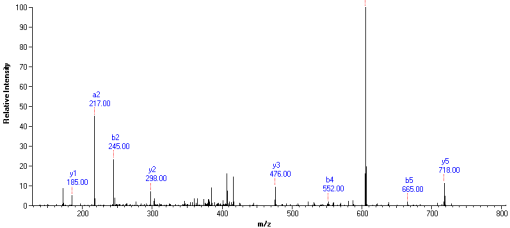

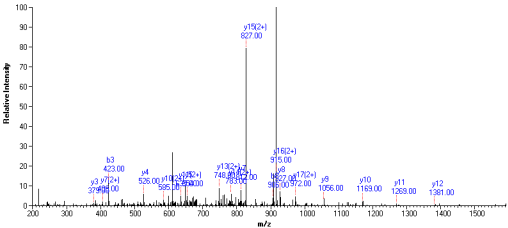

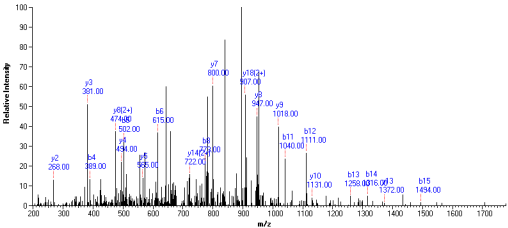

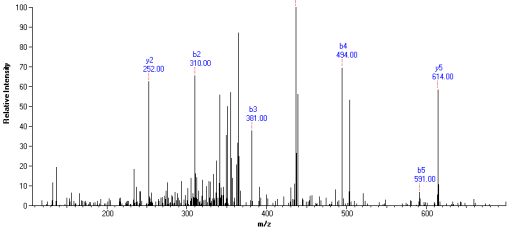



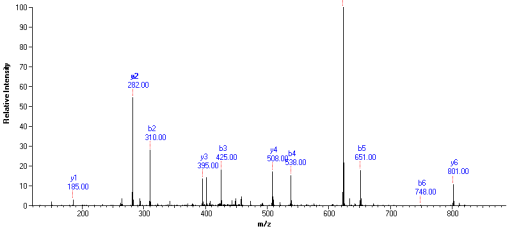

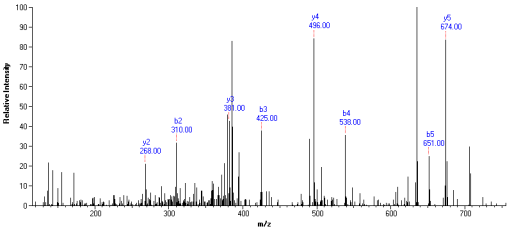

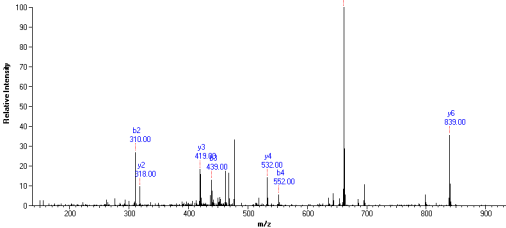

Peptide: \_MK(ac)FEGQK(Iy)\_ Charge: 2+\_m/z: 463.24\_MassError: 2.2288331ppm\_RetentionTime: 12.554min\_MascotScore: 32.16

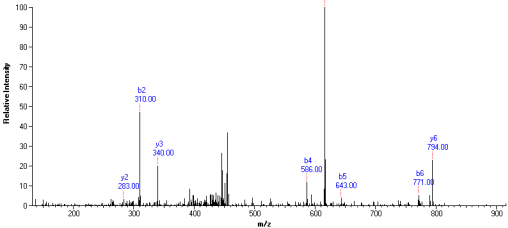

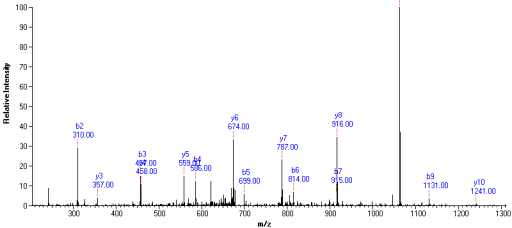

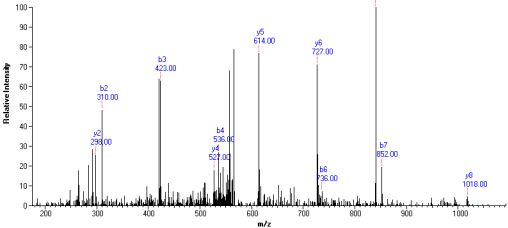

Peptide: **\_MK(ac)LPVR** Charge: 2+  $m/z$ : 402.25  $MassError$ : 1.8056153ppm  $RetentionTime$ : 14.329min  $MasscotScore$ : 28.25

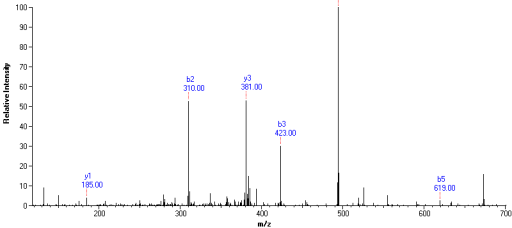

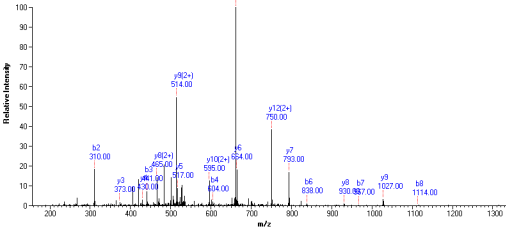



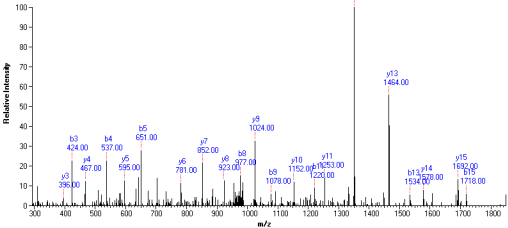

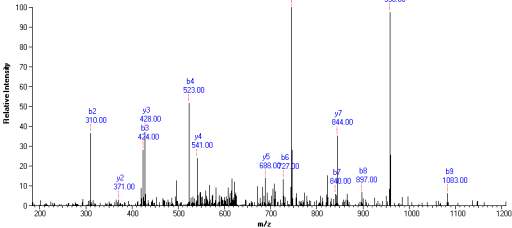

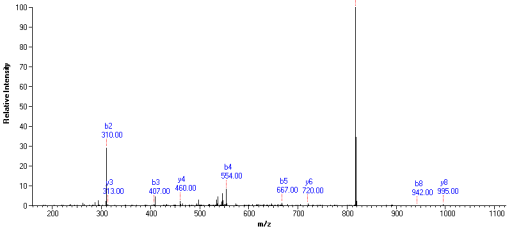

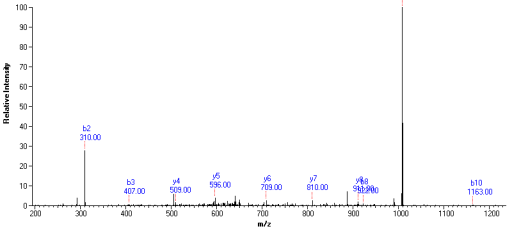

Peptide: **\_MK(ac)QYLELMQK(Iy)\_Charge: 2+\_m/z: 685.36\_MassError: -0.57023363ppm\_RetentionTime: 26.912min\_MascotScore: 65.65**

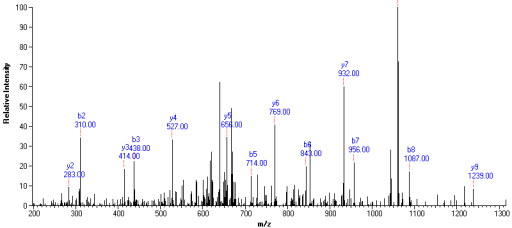

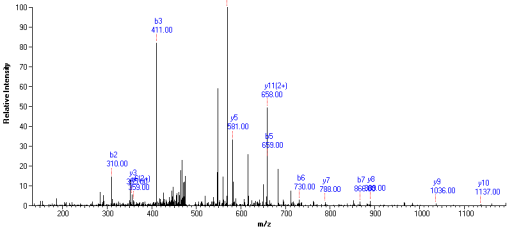

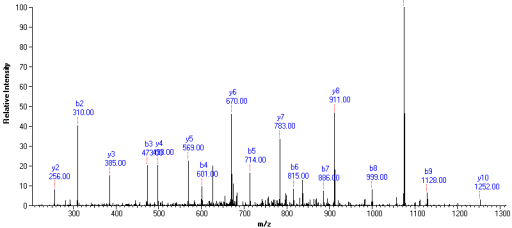

Peptide: \_MK(IY)PSVILYK(ac)ALPDDLLQR\_Charge: 3+\_m/z: 723.42\_MassError: 5.2862033ppm\_RetentionTime: 43.278min\_MascotScore: 26.26

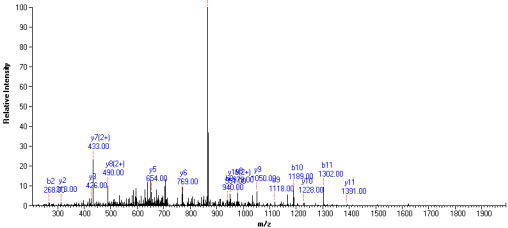



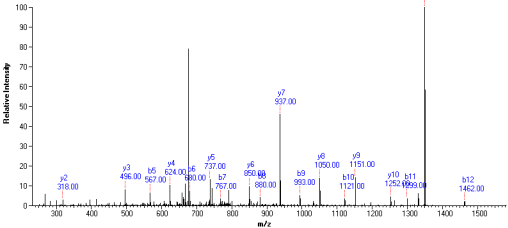

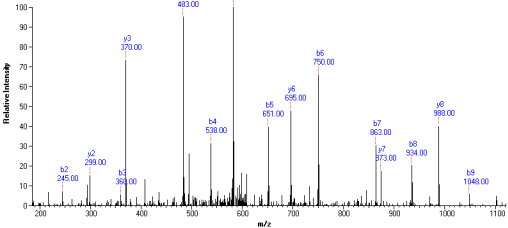

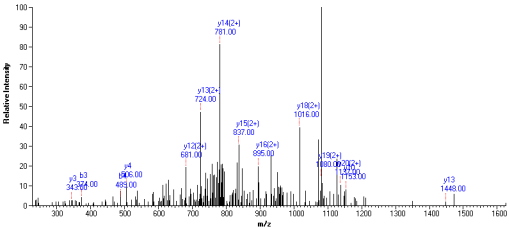

Peptide: \_MLEEISSVK(ac)HIPEFVR\_Charge:2+\_m/z: 987.53\_MassError:3.8241555ppm\_RetentionTime:27.514min\_MascotScore:51.97

Relative Intensity

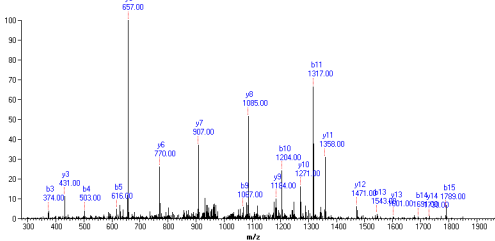

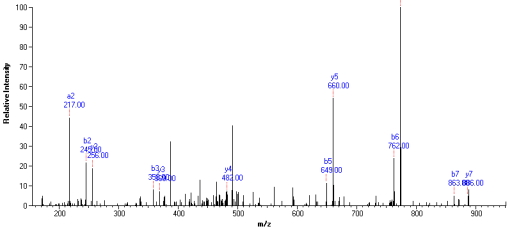

Peptide: \_MLK(ac)IFNTLTR\_Charge:2+\_m/z:648.88\_MassError:2.9330564ppm\_RetentionTime:34.262min\_MascotScore:43.3

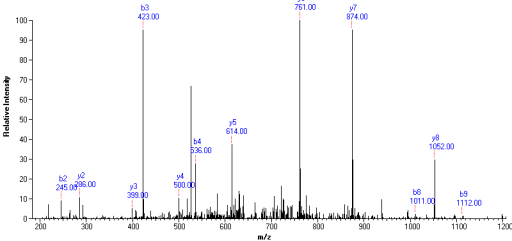

Peptide: \_MLLK(ac)EFDLK(Iy)\_ Charge: 2+\_ m/z: 597.84\_MassError: 1.3125514ppm\_RetentionTime: 32.016min\_MascotScore: 45.49

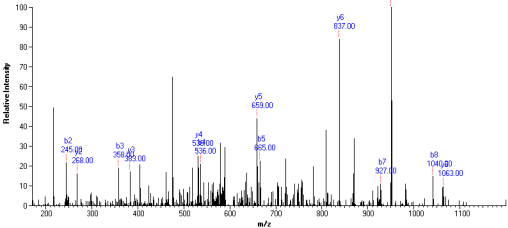

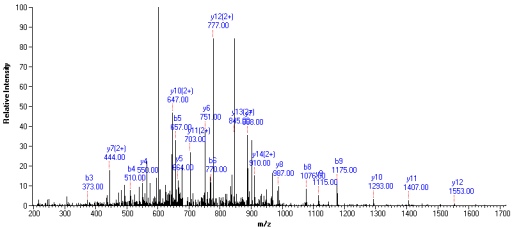



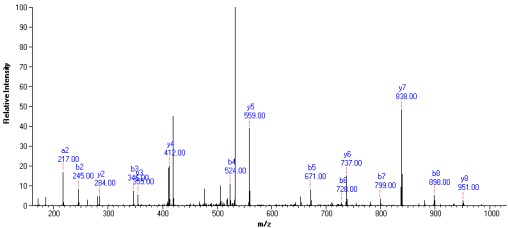

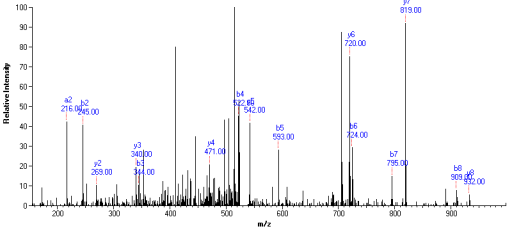

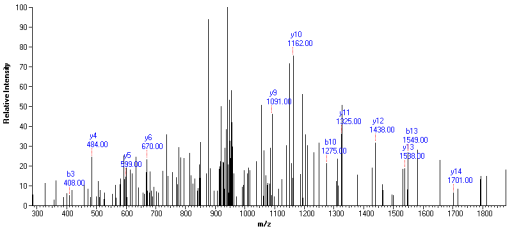

Peptide: \_MMEIAK(ac)K(Iy)\_ Charge: 2+\_m/z: 454.75\_MassError: 1.821815ppm\_RetentionTime: 12.317min\_MascotScore: 37.12

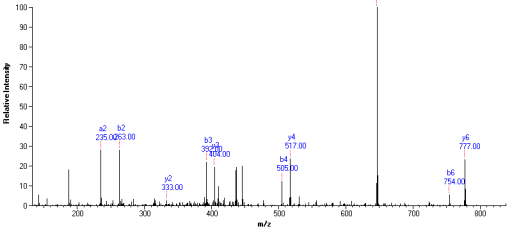

Peptide: \_MMIEK(ac)CIR\_Charge:2+\_m/z: 570.79\_MassError:0.73851839ppm\_RetentionTime:18.656min\_MassotScore:34.14

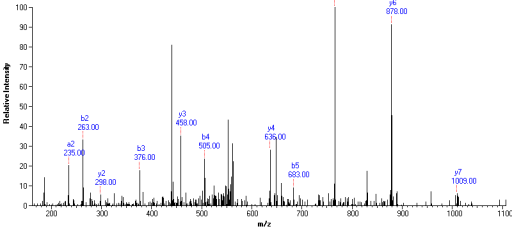

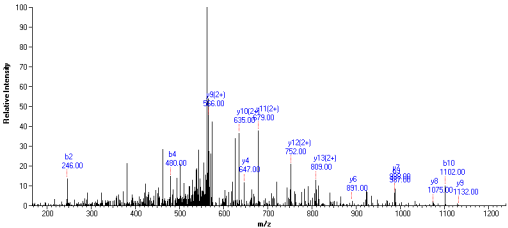

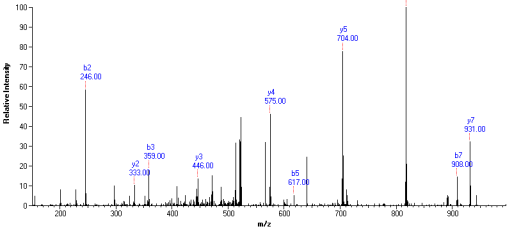

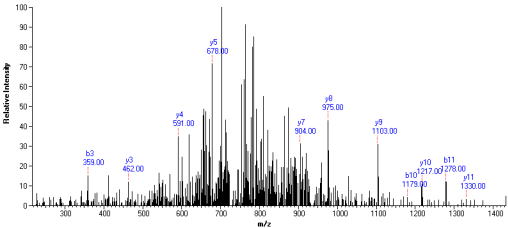



Peptide: \_MNK(ac)EILAVVEAVSNEK(y)\_Charge: 2+\_m/z: 916.5\_MassError: 2.3205479ppm\_RetentionTime: 41.275min\_MascotScore: 40.48

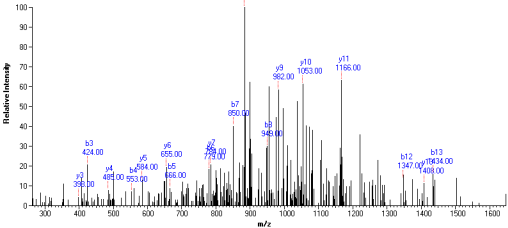

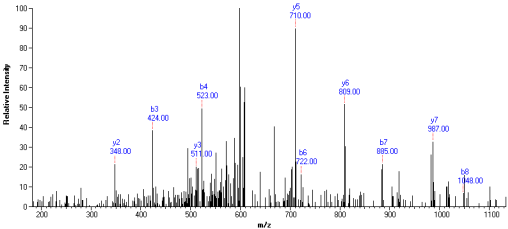

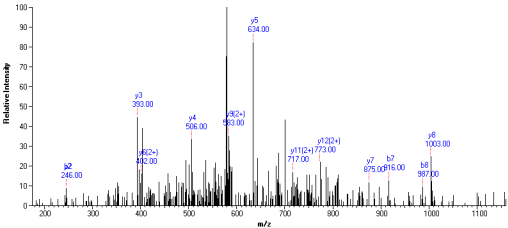

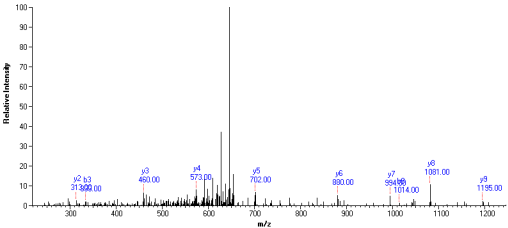

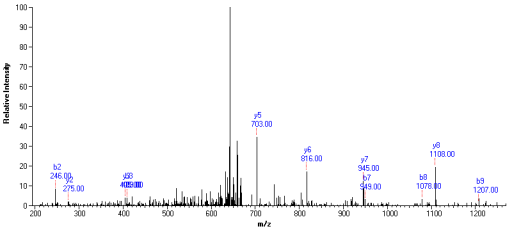

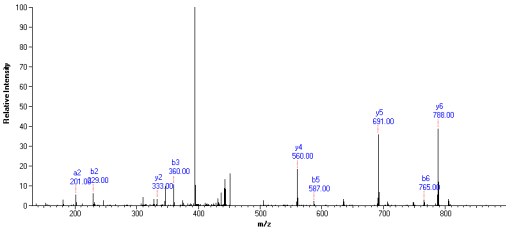

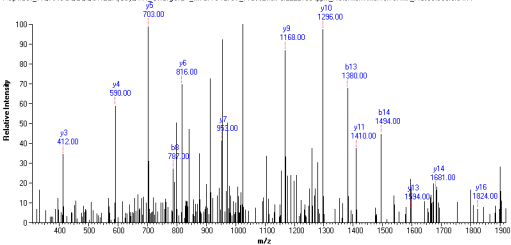

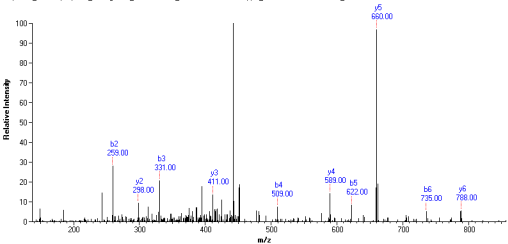



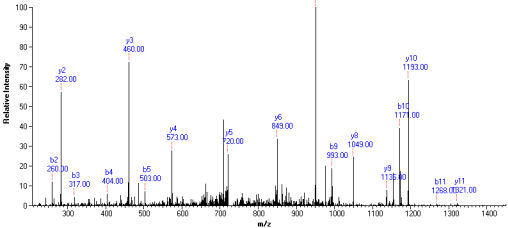

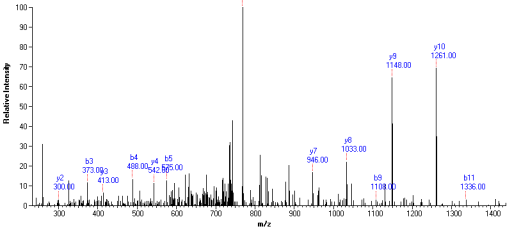

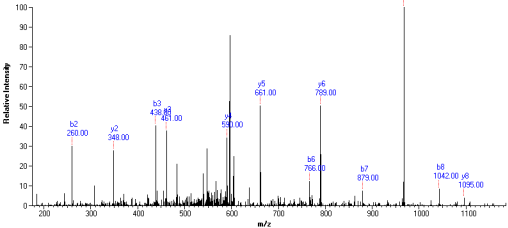

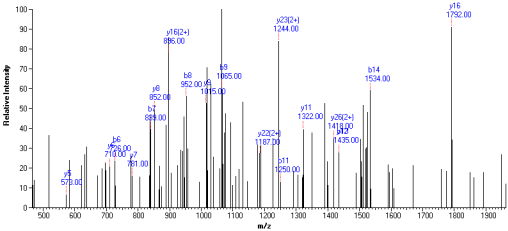

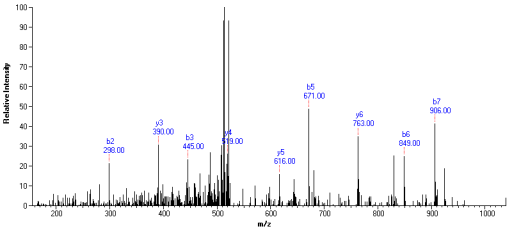

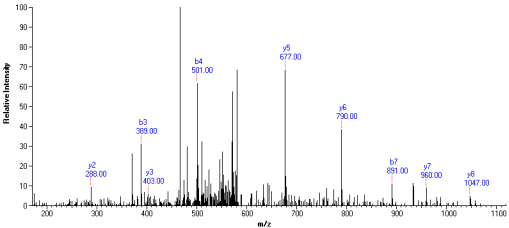

Peptide: \_MTDEAGEDAK[ac]LVAVPHSK[ly]\_Charge:2+\_m/z:978.49\_MassError:1.4102481ppm\_RetentionTime:23.029min\_MascotScore:98.85

Relative Intensity

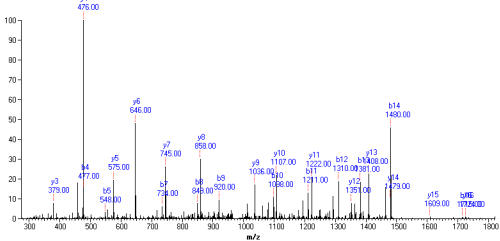

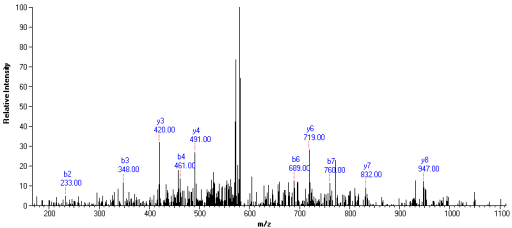



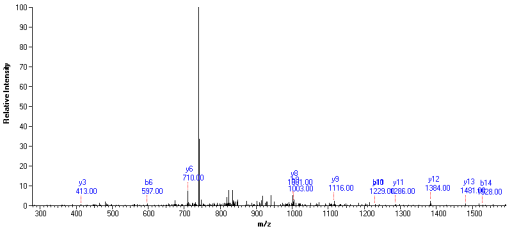

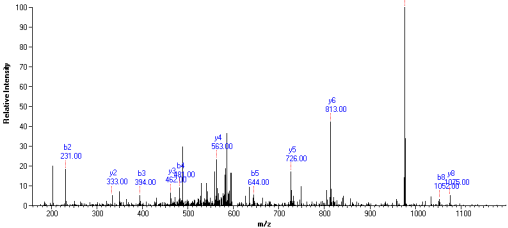

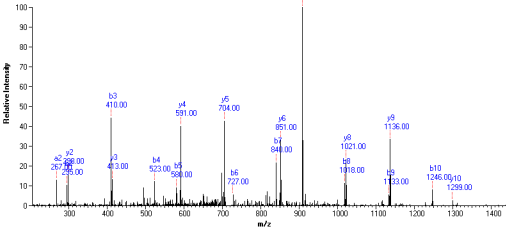

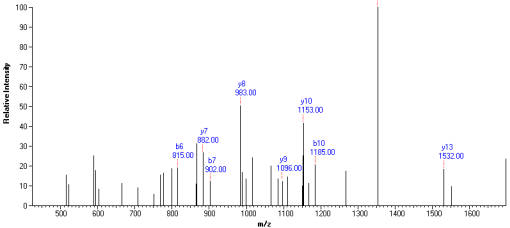

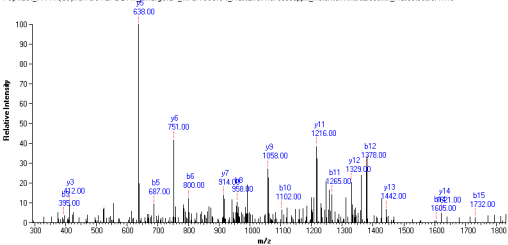

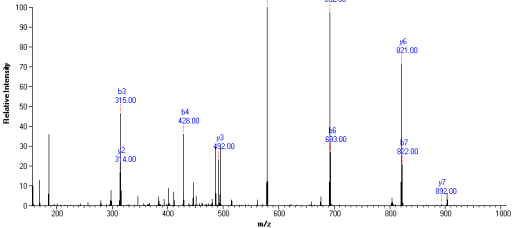

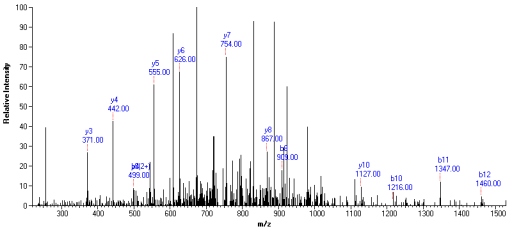

Peptide: \_NAGFINK(ac)R\_Charge: 2+\_m/z: 490.28\_MassError:0.67961925ppm\_RetentionTime:11.882min\_MascotScore:35.79

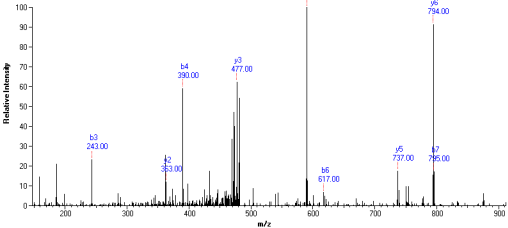



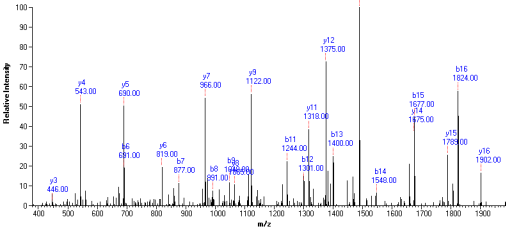

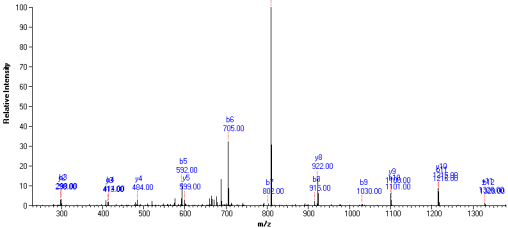

Peptide: \_NALTK(ac)R\_Charge: 2+\_m/z: 381.73\_MassError: 2.3529342ppm\_RetentionTime: 6.9816min\_MaxCotScore: 36.97

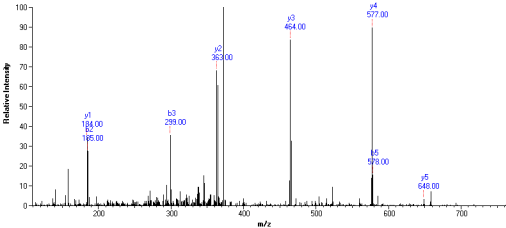

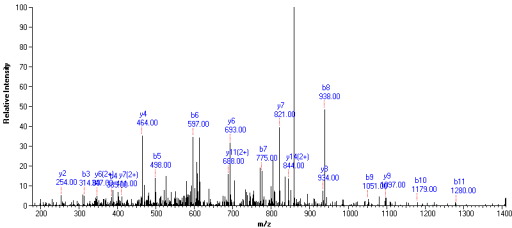

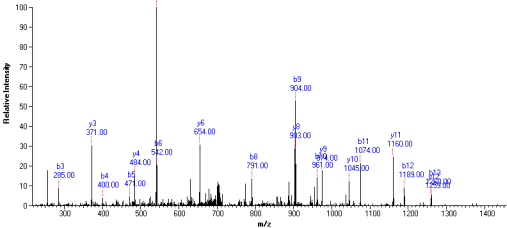

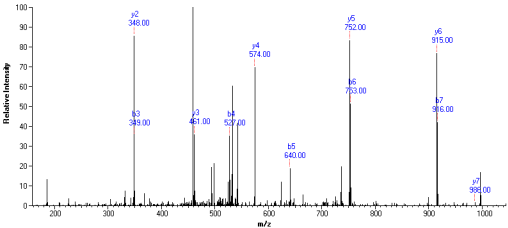

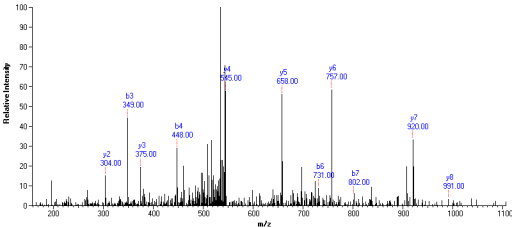

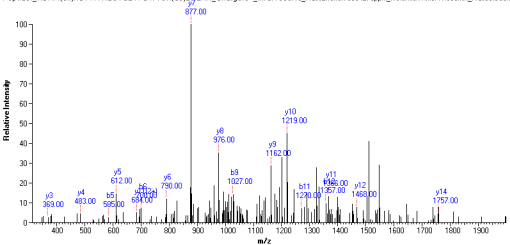



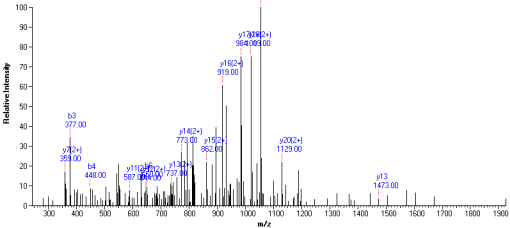

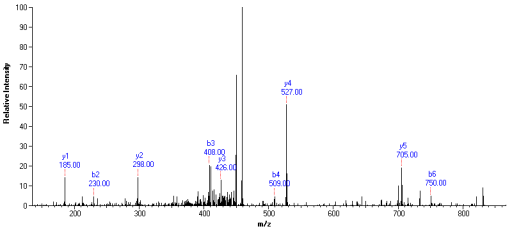

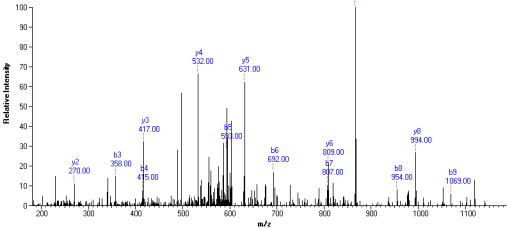

Peptide: \_NEETLEPVYPYFGK(ac)LVSNIDER\_Charge: 3+ \_m/z: 861.11\_MassError: 0.99028491ppm\_RetentionTime: 51.084min\_MascotScore: 62.68

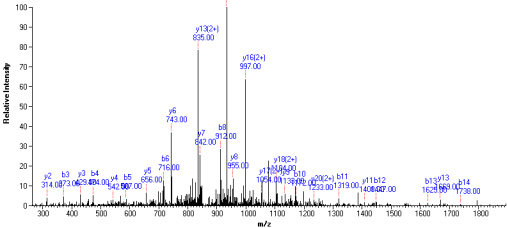

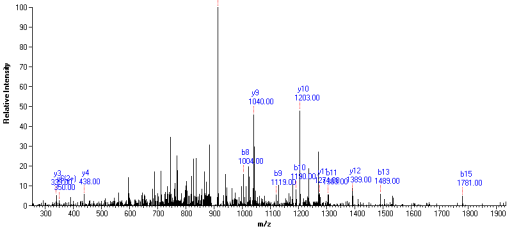

Peptide: \_NEK(ac)IGFK(Iy)\_Charge: 2+\_m/z: 447.26\_MassError: 2.3878813ppm\_RetentionTime: 12.26min\_MascotScore: 38.82

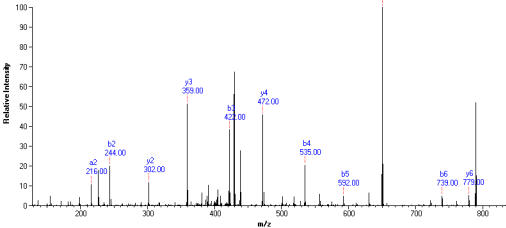

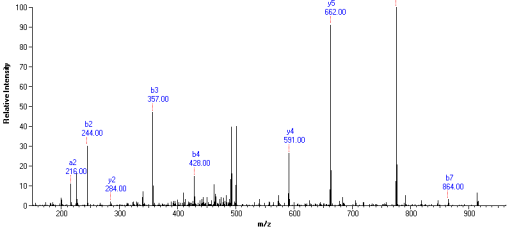

Peptide: \_NELSSYK(ac)QLPLNFYQIQTK(L) Charge: 3+ m/z: 791.75\_MassError: 0.9742978ppm\_RetentionTime: 38.79min\_MascotScore: 50.99

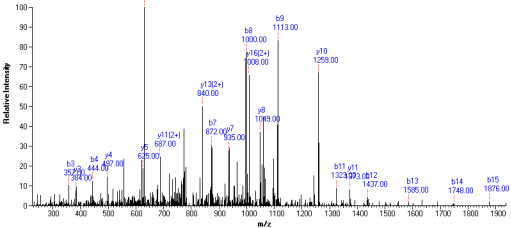



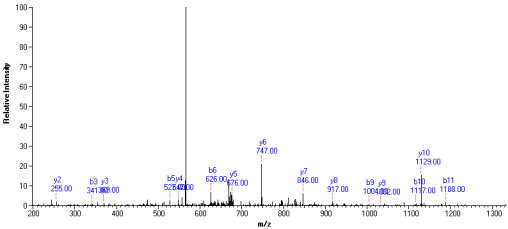

Peptide: \_NFCNK(ac)LWNASR\_Charge: 2+\_m/z: 735.36\_MassError: 2.053835ppm\_RetentionTime: 31.131min\_MascotScore: 51.5

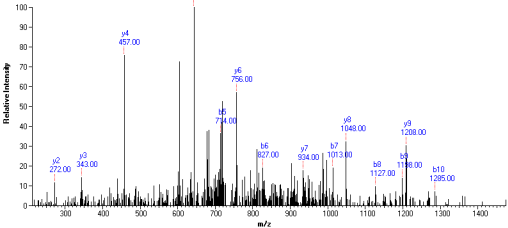

Peptide: \_NFDK(ac)GLQEITDWIEK(y)\_Charge:2+\_m/z: 947.48\_MassError:1.6667757ppm\_RetentionTime:50.714min\_MascotScore:48.52

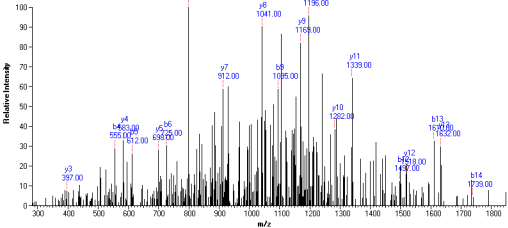

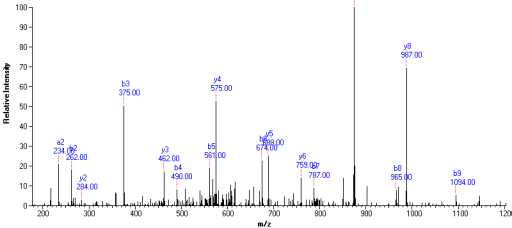

Peptide: \_NFLVEK(ac)MR\_Charge: 2+ \_m/z: 548.8\_MassError: -0.47611728ppm\_RetentionTime: 29.411min\_MascotScore: 22.72

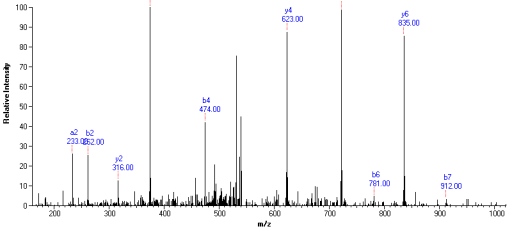

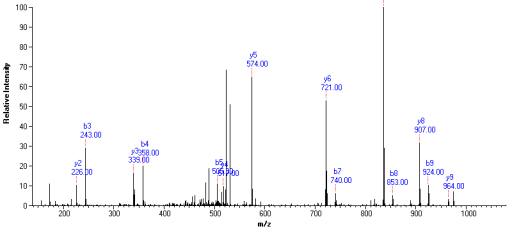

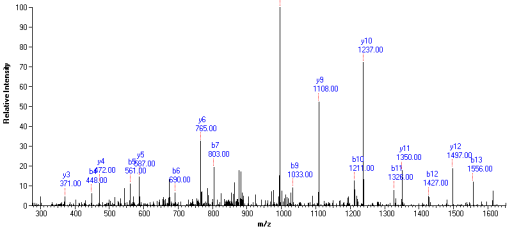

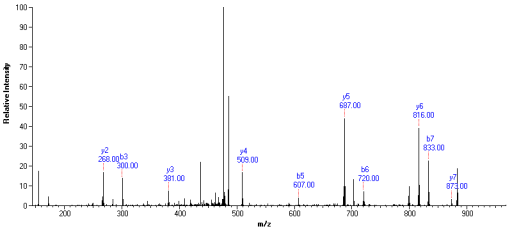



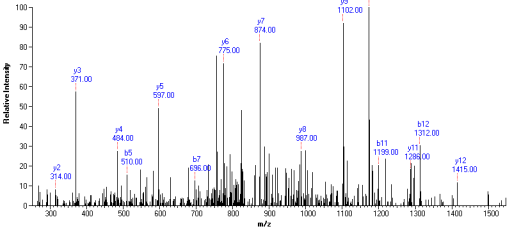

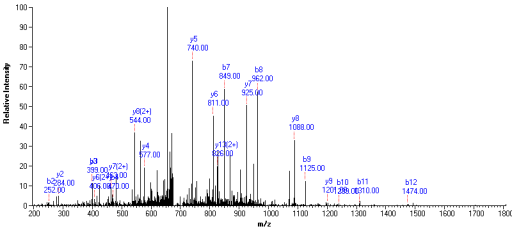

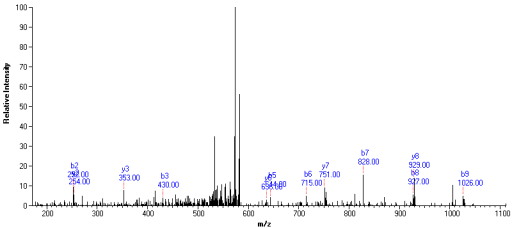

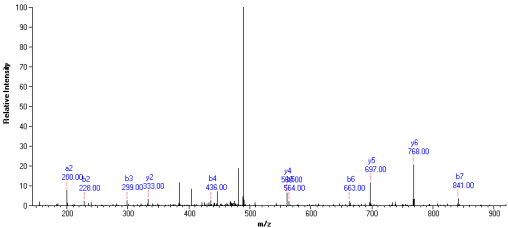

Peptide: \_NIGVNVK(ac)LYNQEWK [y\_Charge:2+\_m/z: 850.48\_MassError:0.98768299ppm\_RetentionTime:35.563min\_MascotScore:59.61

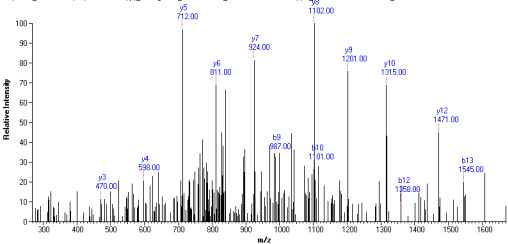

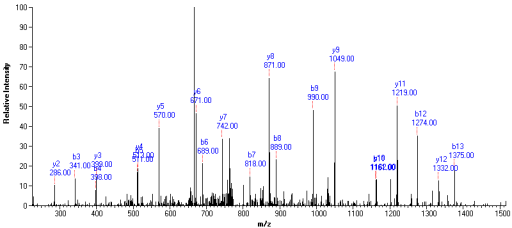

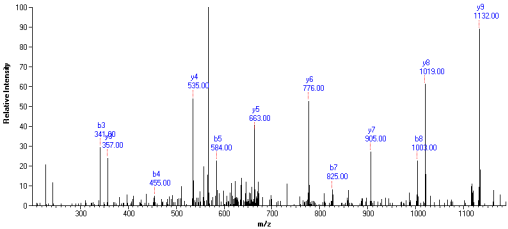

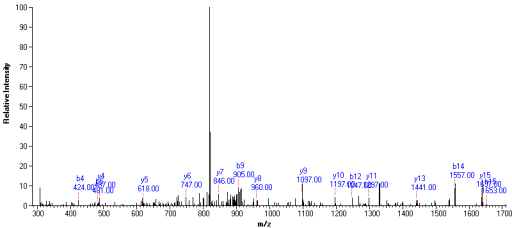



Peptide: \_NITDIDDK(ac)IHK(Iy)\_Charge: 2+\_m/z: 673.38\_MassError: 1.5634212ppm\_RetentionTime: 27.044min\_MascotScore: 59.5

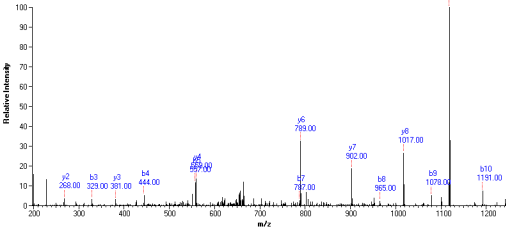

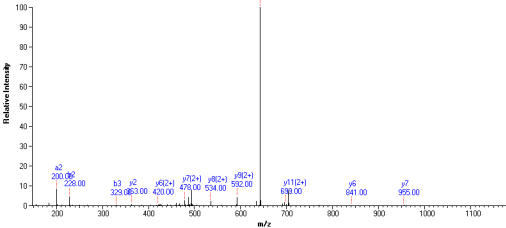

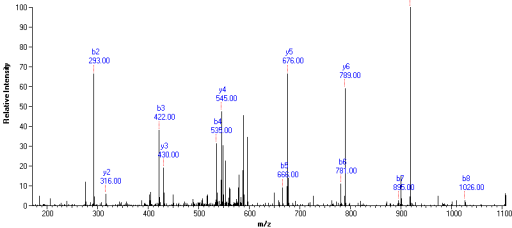

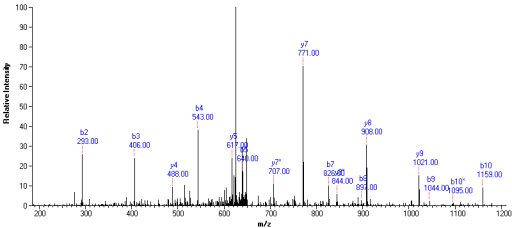

Peptide: **\_NK(ac)LFGYTTLDIR\_Charge:2+\_m/z: 775.46\_MassError:5.6817308ppm\_RetentionTime:45.401min\_MascotScore:84.34**

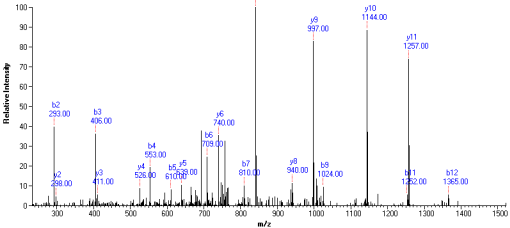

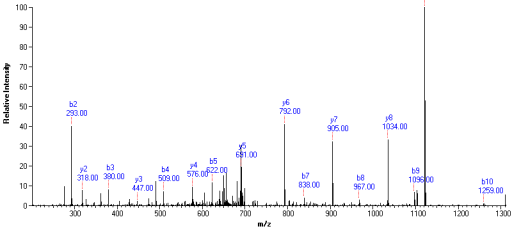

Peptide: **\_NK(ac)SIK(ac)DR**\_Charge: 2+\_m/z: 485.78\_MassError: 0.91326052ppm\_RetentionTime: 7.9221min\_MassotScore: 24.87

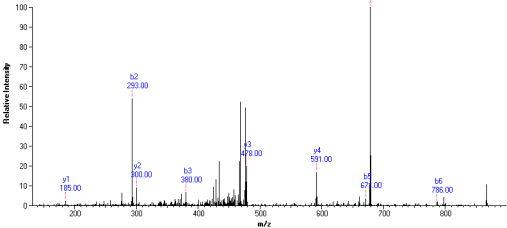

Peptide: **\_NK(ac)YM(ox)ELGPR**\_Charge: 2+\_m/z: 592.3\_MassError: 0.53703734ppm\_RetentionTime: 18.923min\_MascotScore: 44.4

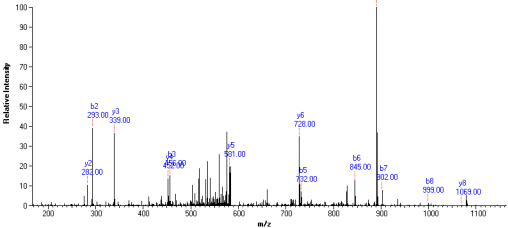



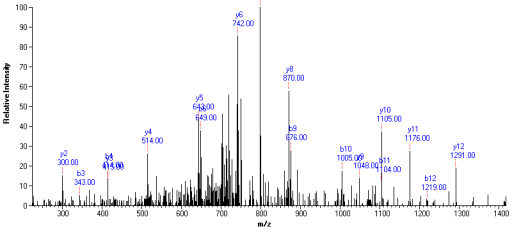

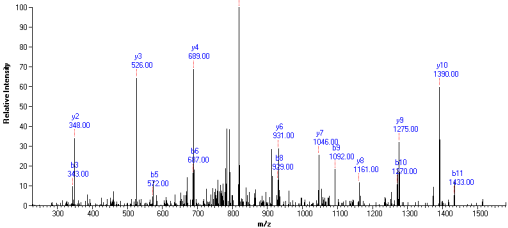

Peptide: **\_NLEVMVK(ac)GPGPGR** Charge: 2+  $m/z$ : 698.37\_MassError: 0.73669781ppm\_RetentionTime: 22.069min\_MascotScore: 61.12

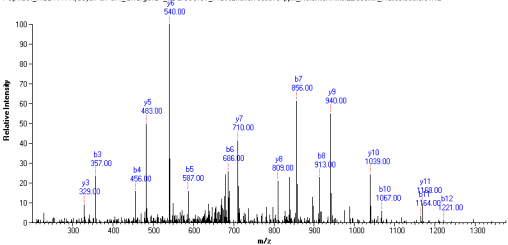

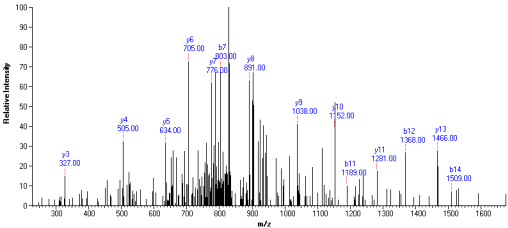

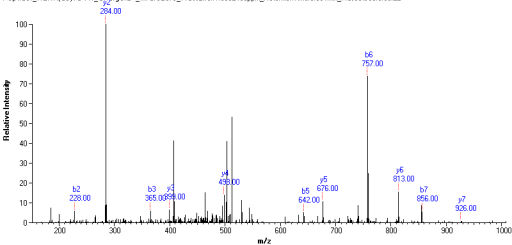

Peptide: \_NLK(ac)IVELEAPQLPR\_Charge:2+ m/z: 840.5\_MassError:1.6515173ppm\_RetentionTime:39.864min\_MascotScore:23.16

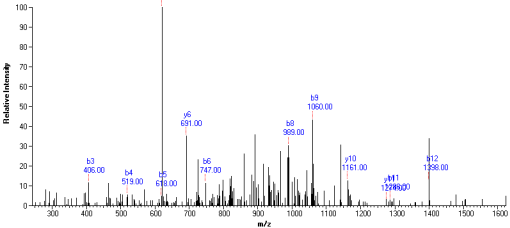

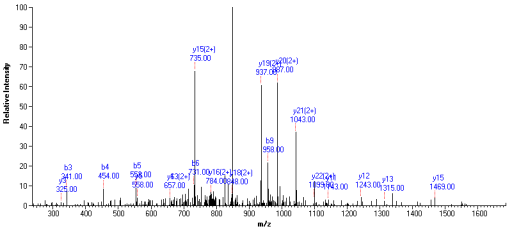

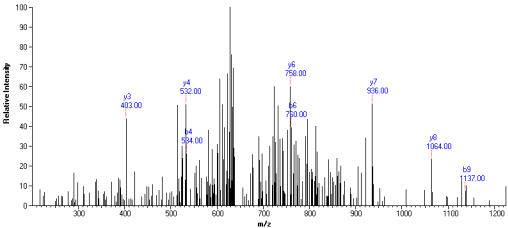



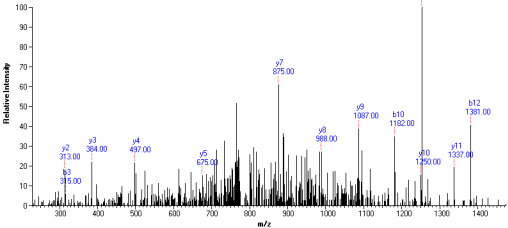

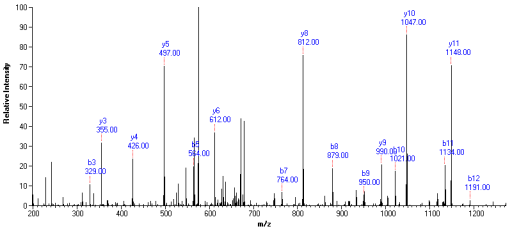

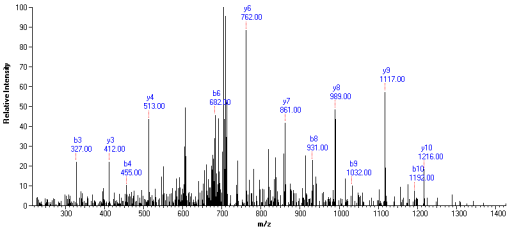

Peptide: **\_NM[ox]AFDLGEK[ac]NIR**\_Charge: 2+\_m/z: 742.37\_MassEng: -2.9234557ppm\_RetentionTime: 28.614min\_MascotScore: 55.21

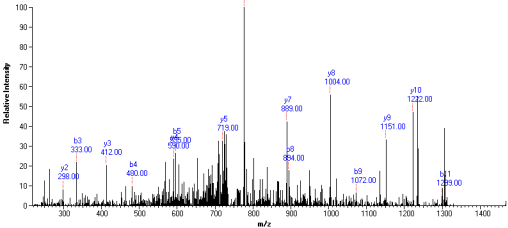

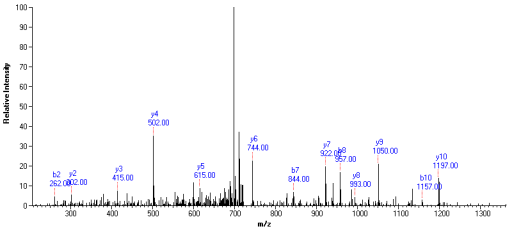

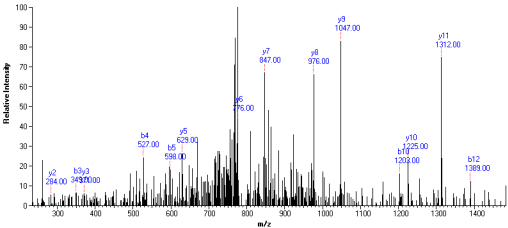

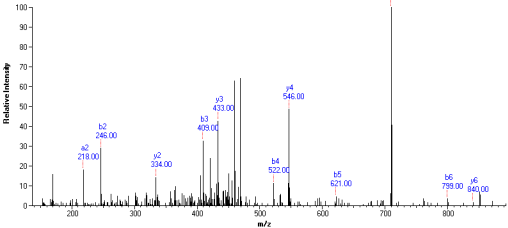

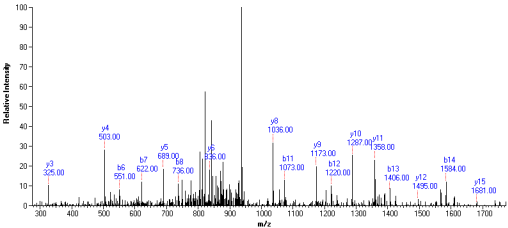



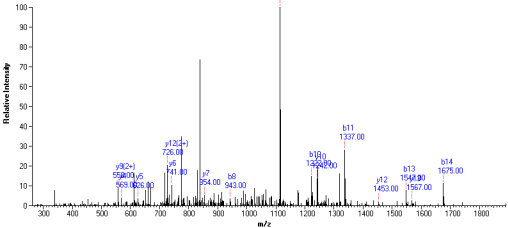

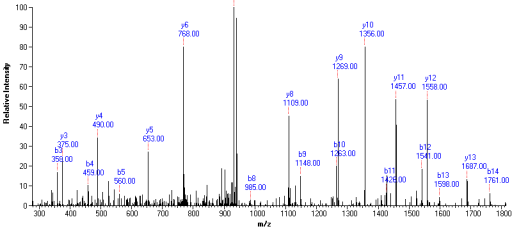

Peptide: **\_NNYDVIK(ac)GFAR\_Charge:2+\_m/z:646.86\_MassError:0.85610575ppm\_RetentionTime:30.415min\_MascotScore:46.58**

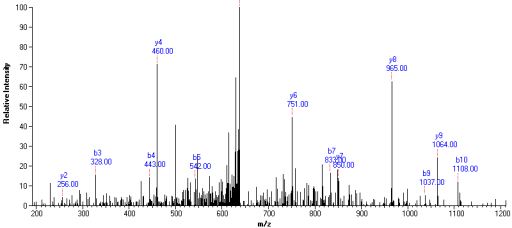

Peptide: **\_NNVIGLLEDPK(ac)SVYK**[y]<sub>Charge: 2+</sub>\_m/z: 841.99\_MassError: -0.76538914ppm\_RetentionTime: 42.818min\_MassotScore: 59.75

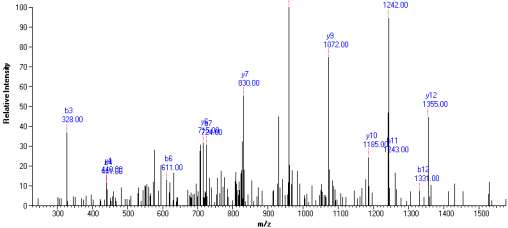

Relative Intensity

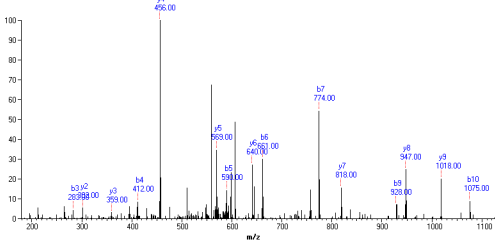

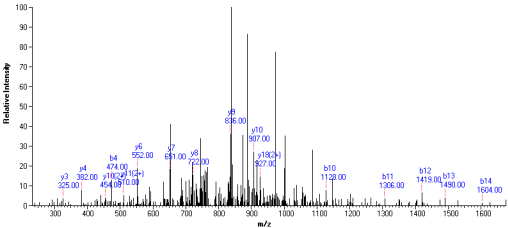

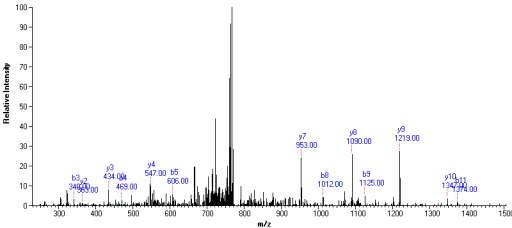

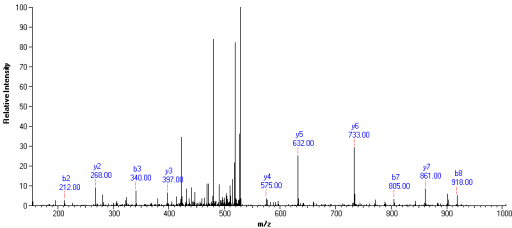



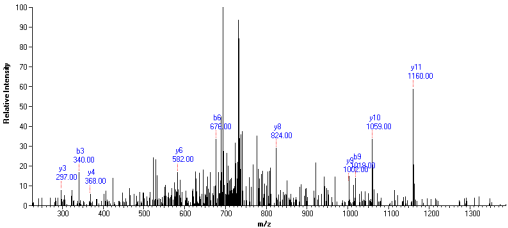

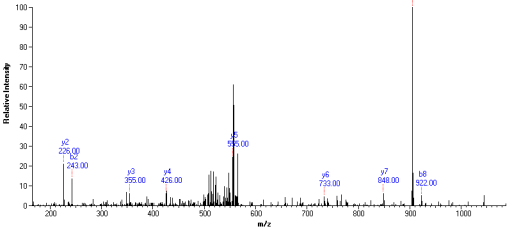

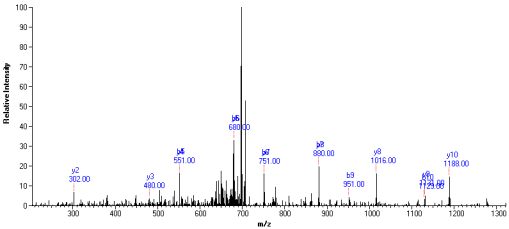

Peptide: \_NQITLPVILK(ac)NER\_Charge: 2+\_m/z: 799.47\_MassError: 1.6517104ppm\_RetentionTime: 37.373min\_MascotScore: 38.72

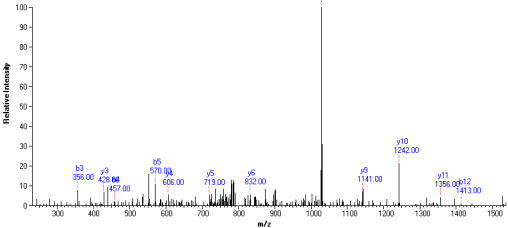

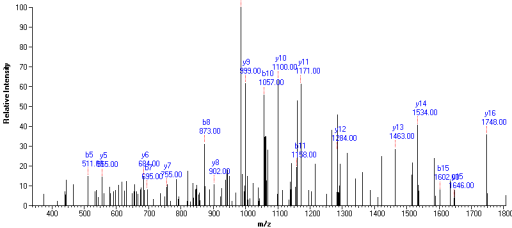

Peptide: \_NSIK(ac)SIQDYPK (ly)\_Charge: 2+\_m/z: 675.87\_MassError: 1.3941307ppm\_RetentionTime: 23.334min\_MaxcotScore: 56.34

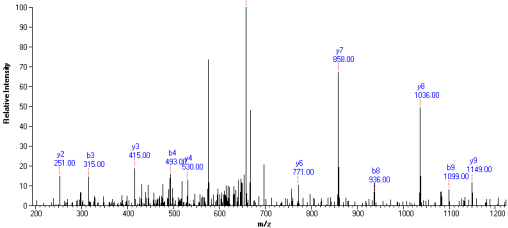

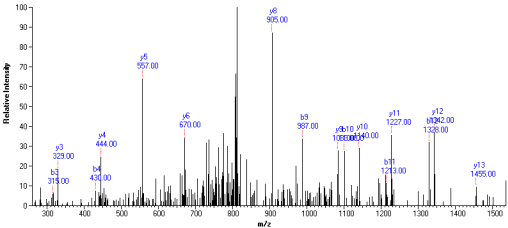

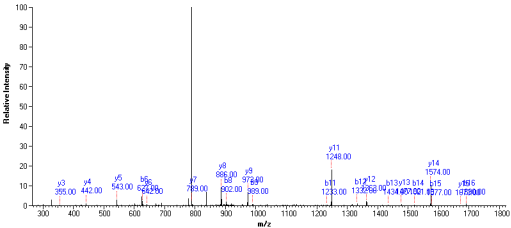



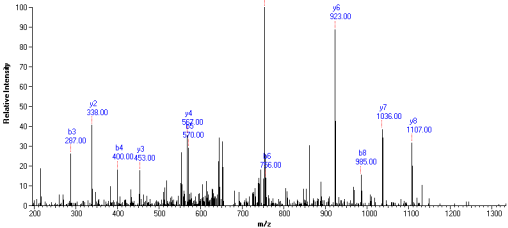

Peptide: \_NTASDQVTQHVHFYDK(ac)K(Iy)\_Charge: 3+\_m/z: 671.34\_MassError: 1.1286914ppm\_RetentionTime: 20.503min\_MascotScore: 31.55

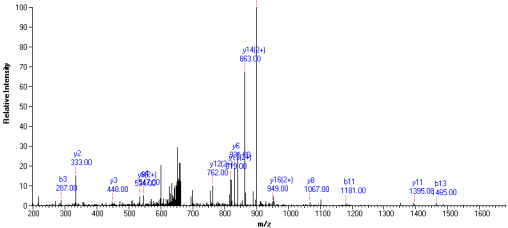

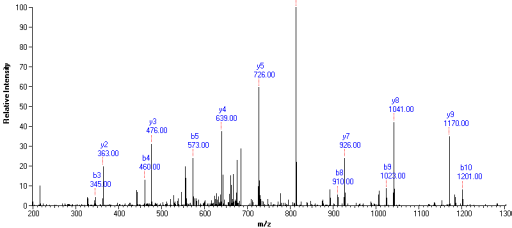

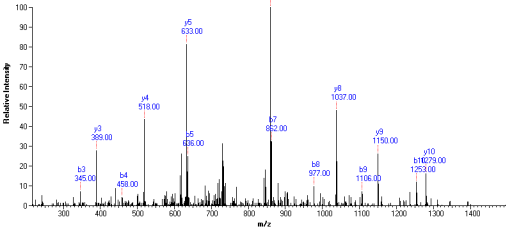

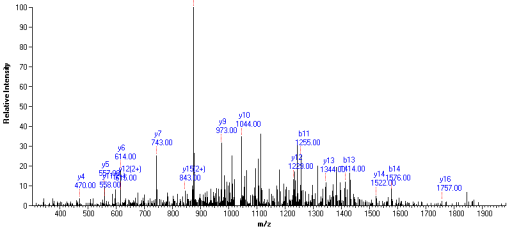

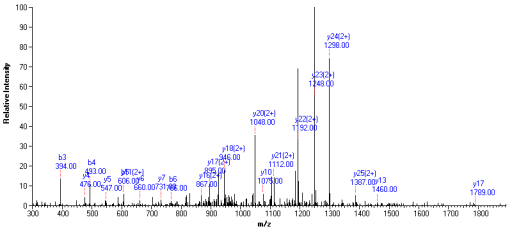

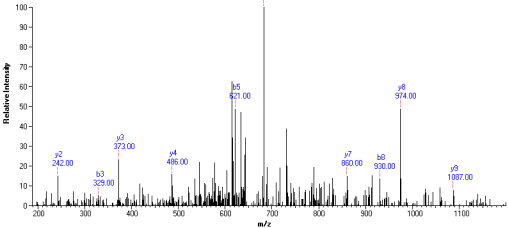

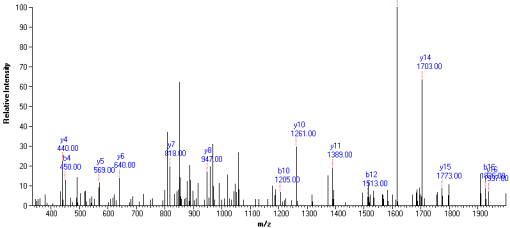



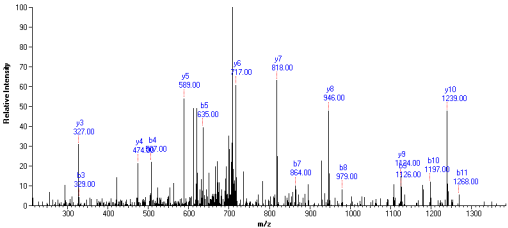

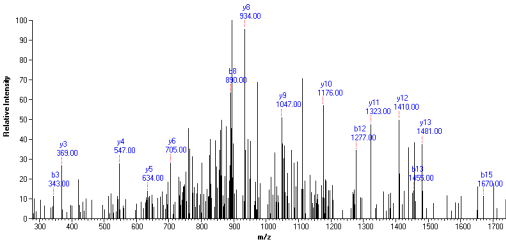

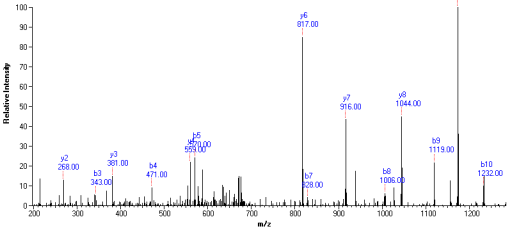

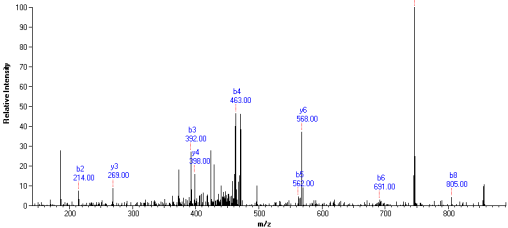

Peptide: \_NVVLDK(ac)SFGAPTITK\_Charge:2+\_m/z:816.46\_MassError:1.486569ppm\_RetentionTime:27.967min\_MascotScore:47.83

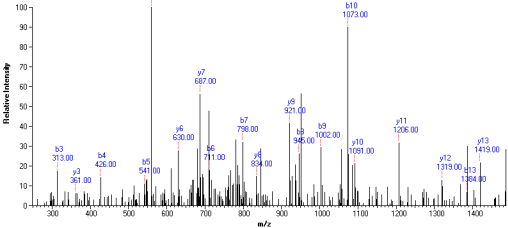

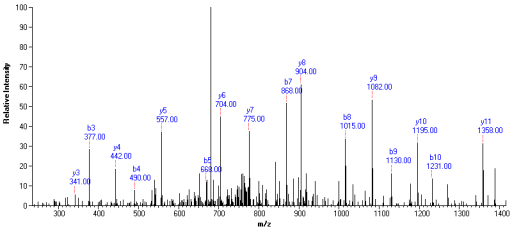

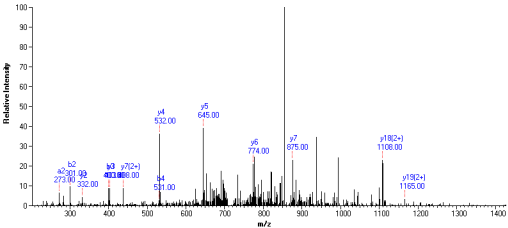

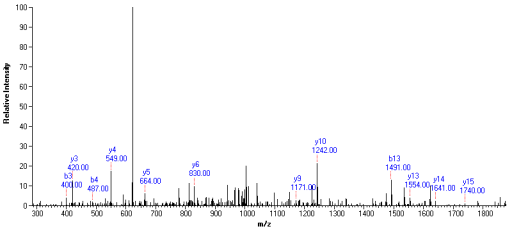



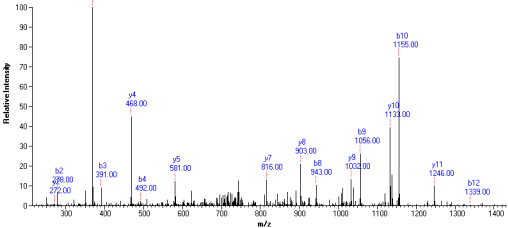

Peptide: **\_NYLVEK(ac)**MR\_Charge:2+\_m/z:556.8\_MassError:0.32723665ppm\_RetentionTime:25.827min\_MassotScore:48.08

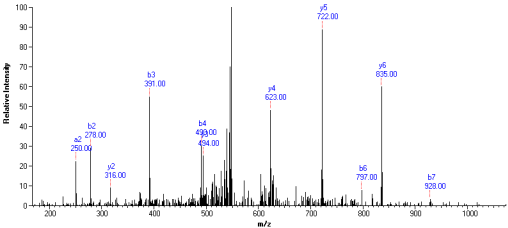

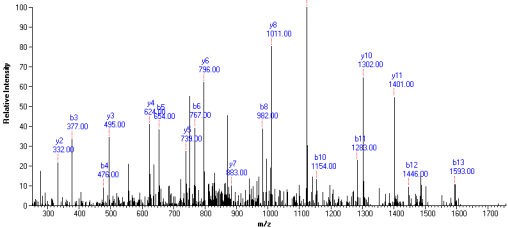

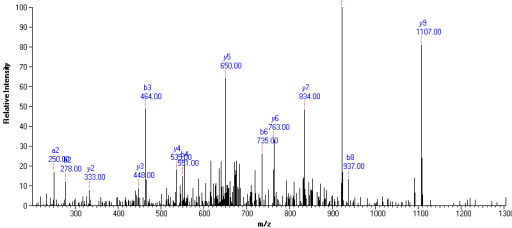

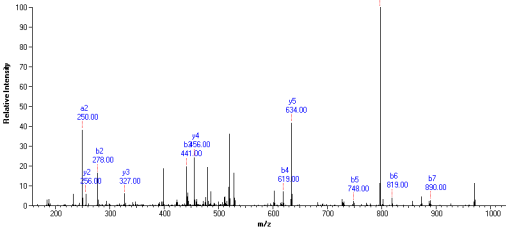

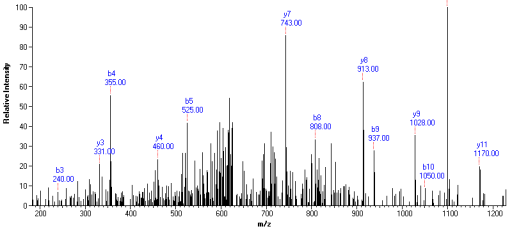

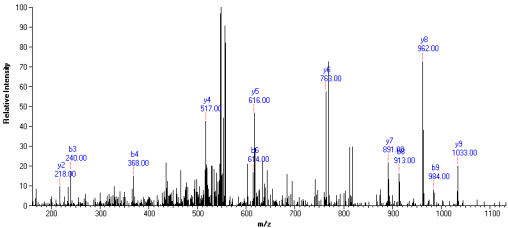

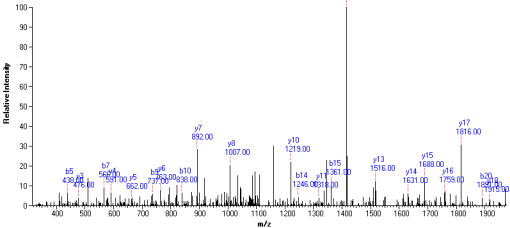



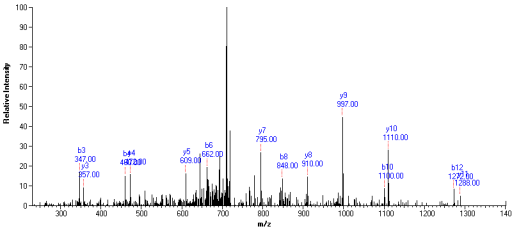

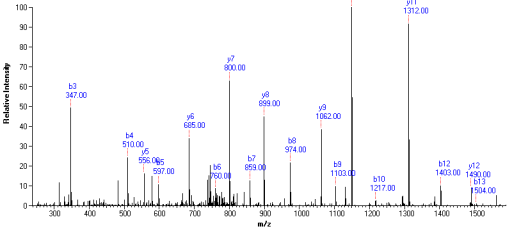

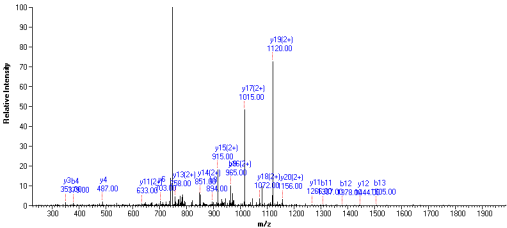

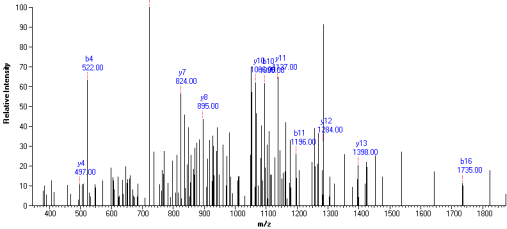

Peptide: \_PEFIK(ac)PEDVSAEVVEK(y)\_Charge:2+\_m/z:937.49\_MassError:0.90144645ppm\_RetentionTime:34.804min\_MascotScore:51.45

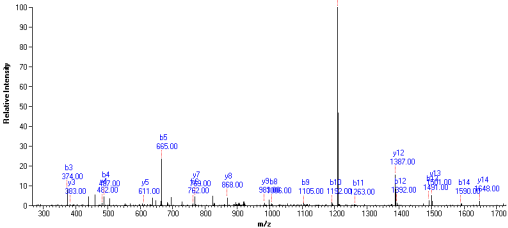

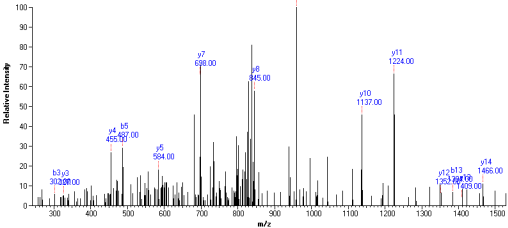

Peptide: \_PFIGDK(ac)AGNFQR\_Charge: 2+\_m/z: 705.37\_MassError: 0.58950198ppm\_RetentionTime: 26.797min\_MascotScore: 30.78

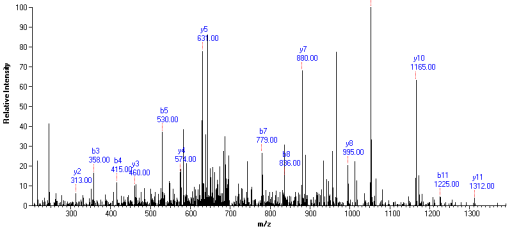

Peptide: PFIYGK(ac)LELR\_Charge: 2+\_m/z: 648.38\_MassError: 0.29328875ppm\_RetentionTime: 30.857min\_MascotScore: 62.89

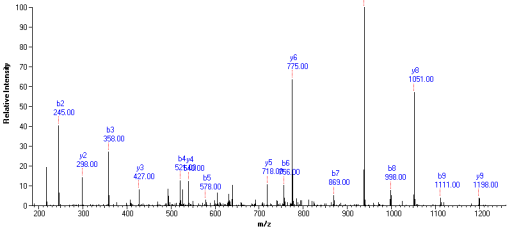



Peptide: \_PGEAIEHPWVTK(ac)ALANQR\_Charge: 3+\_m/z: 716.72\_MassError: 0.33345592ppm\_RetentionTime: 26.35min\_MaxCotScore: 45.59

Relative Intensity

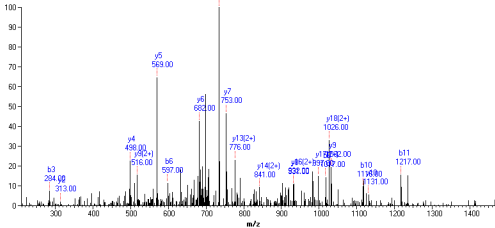

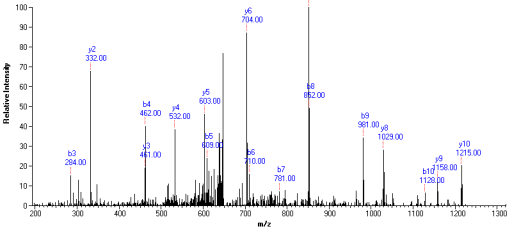

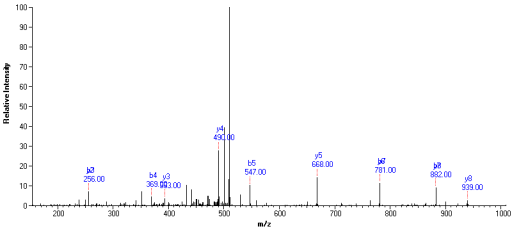

Peptide: \_PHTK(ac)FESEVYILSK(y)\_Charge: 2+\_m/z: 868.47\_MassError: 2.2547553ppm\_RetentionTime: 26.739min\_MascotScore: 79.05

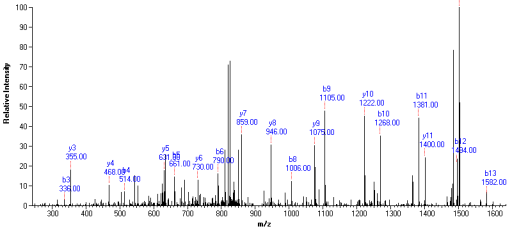

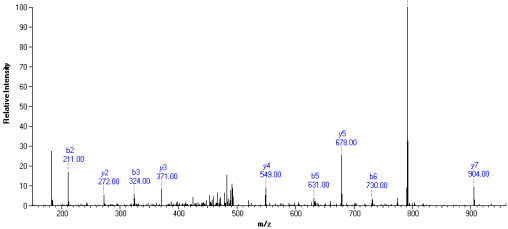

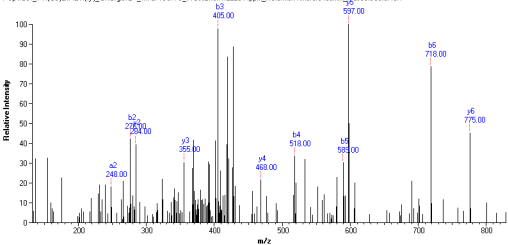

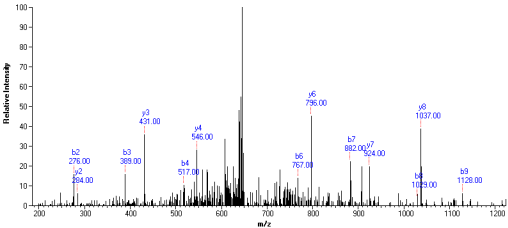

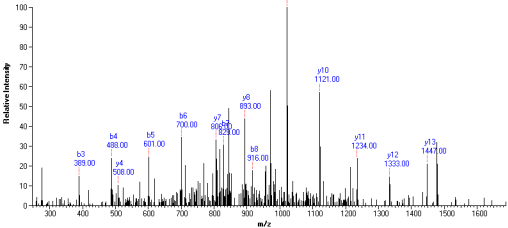



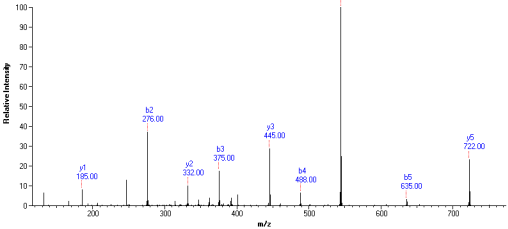

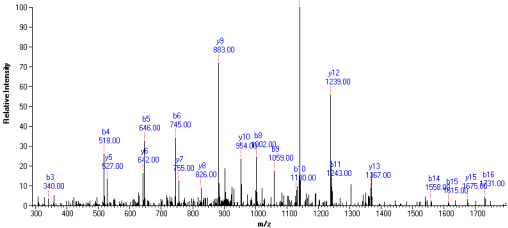

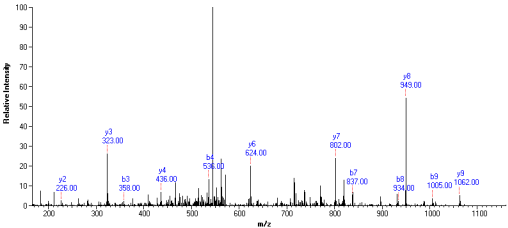

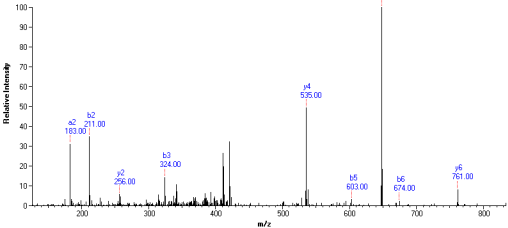

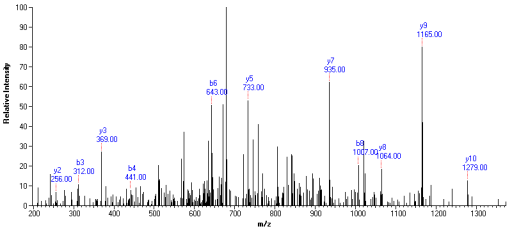

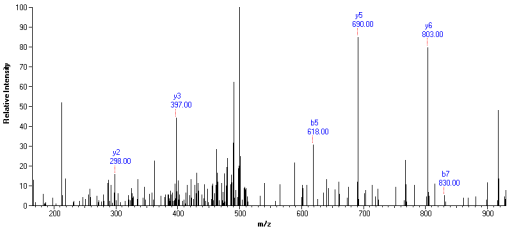

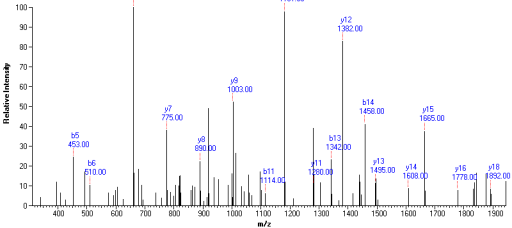

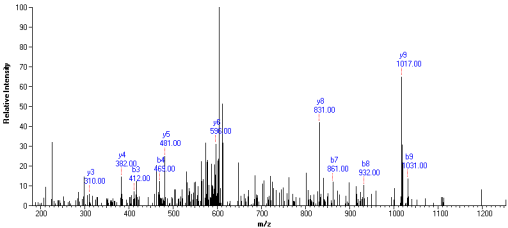



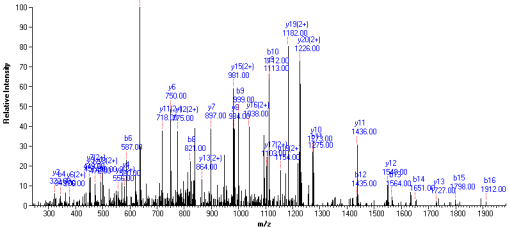

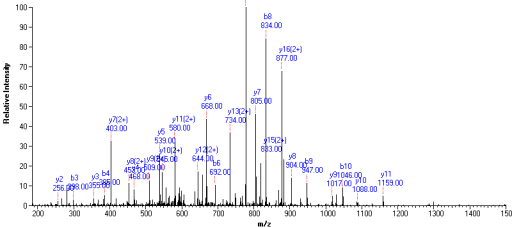

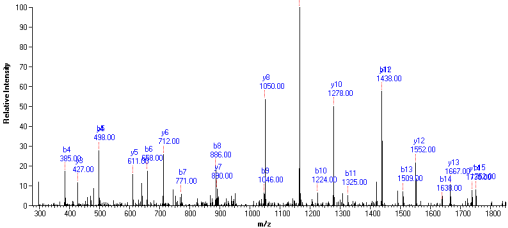

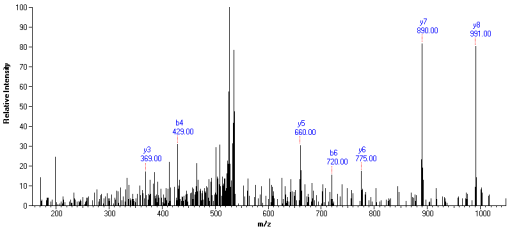

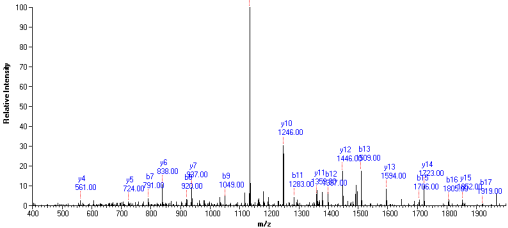

Peptide: PVMEGK(ac)GVLFK(Iy)\_Charge: 2+\_m/z: 631.86\_MassError: 1571.2686ppm\_RetentionTime: 25.942min\_MascotScore: 51.97

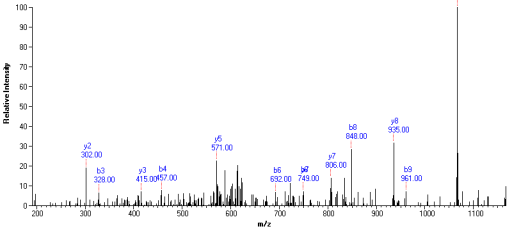

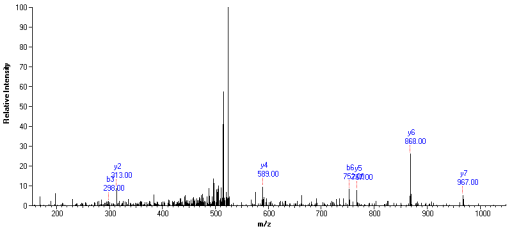

Peptide: \_PWDK(ac)ER\_Charge: 2+\_m/z: 445.73\_MassError: 1.9814698ppm\_RetentionTime: 9.5947min\_MascotScore: 42.94

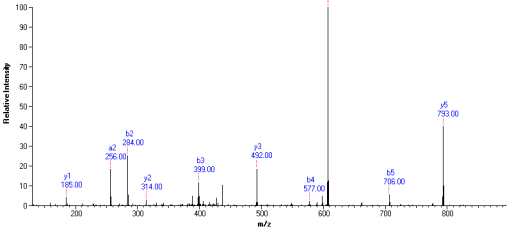



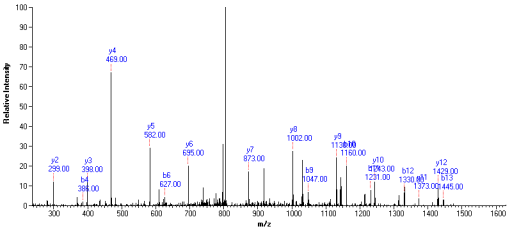

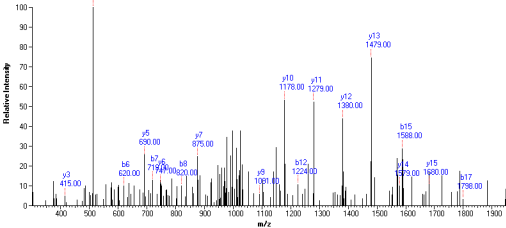

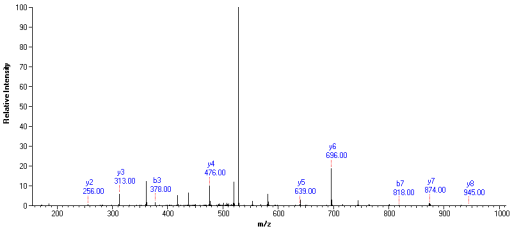

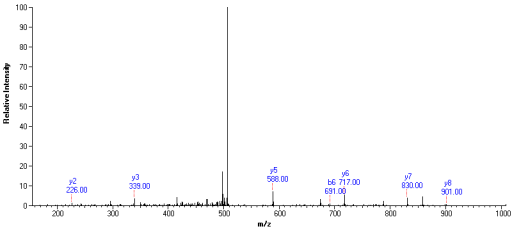

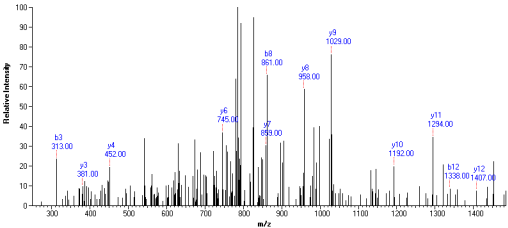

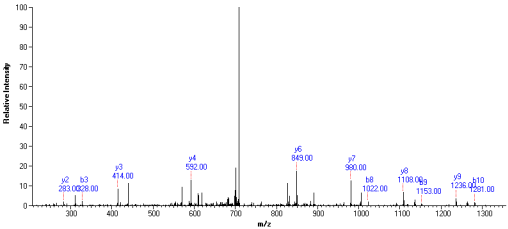

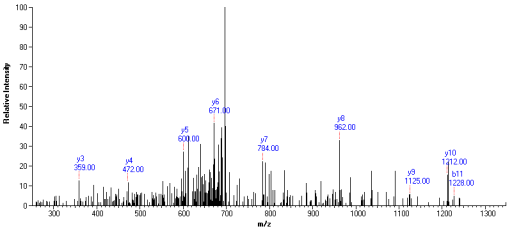

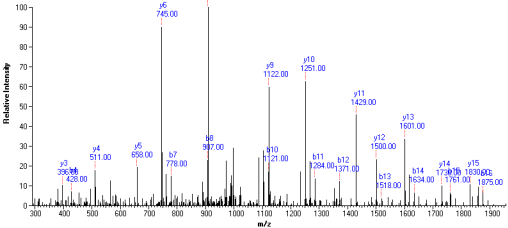



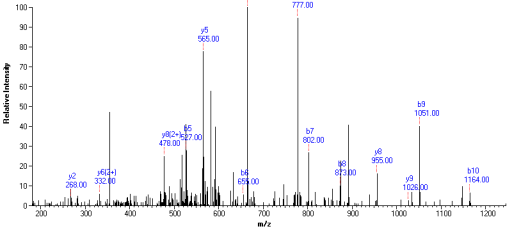

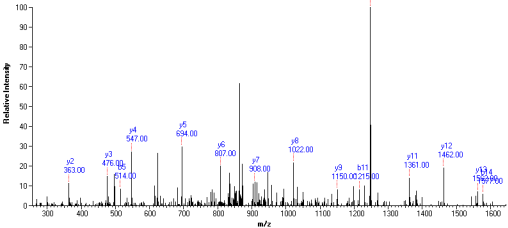

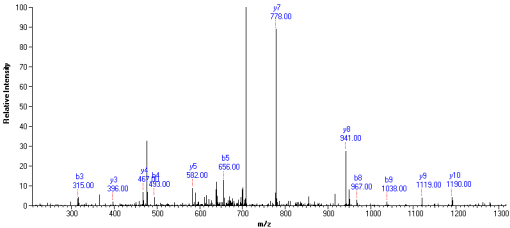

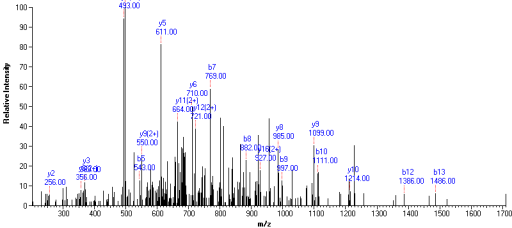

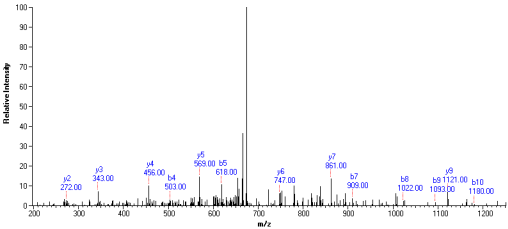

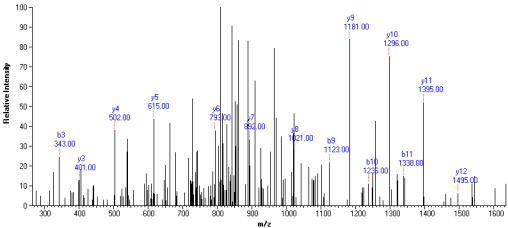

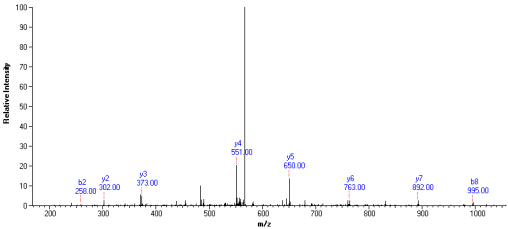

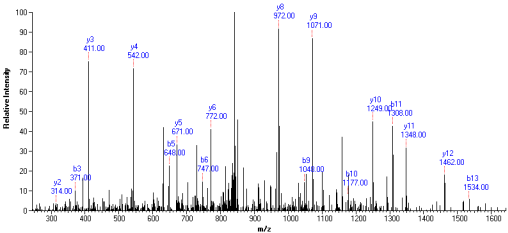



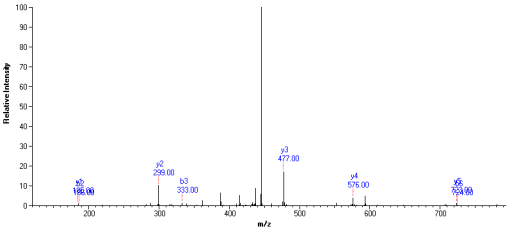

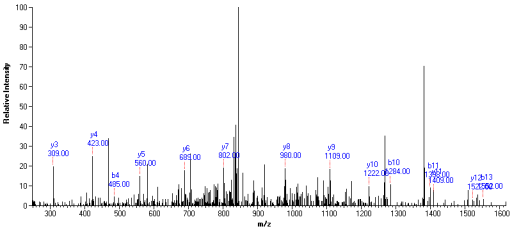

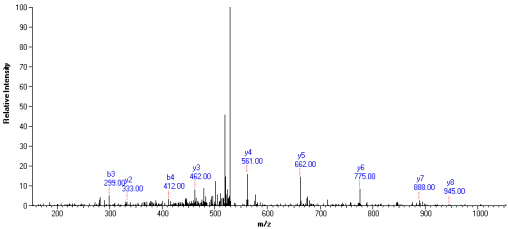

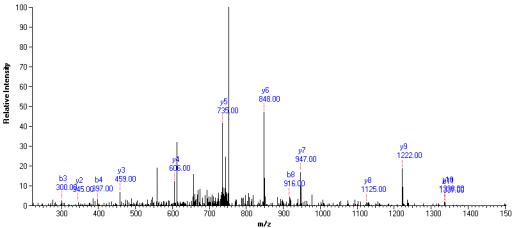

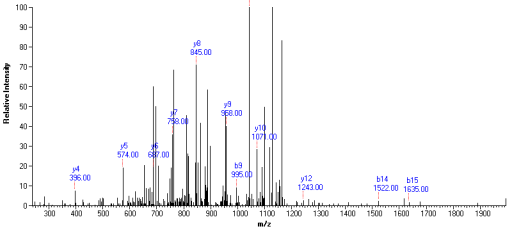

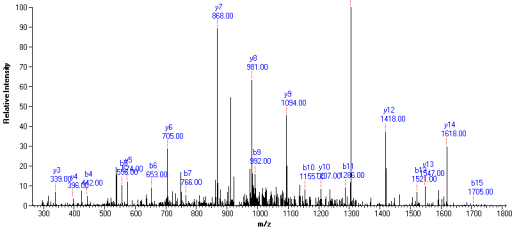

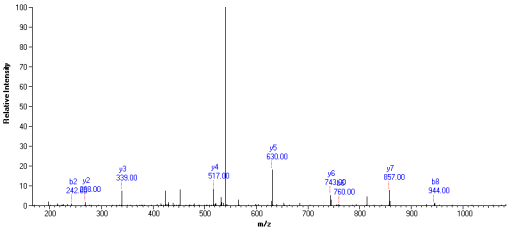

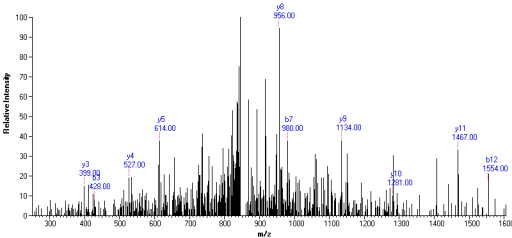



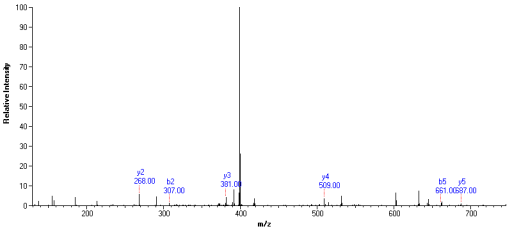

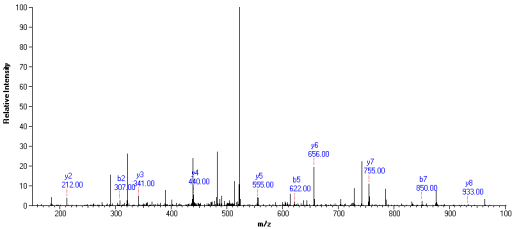

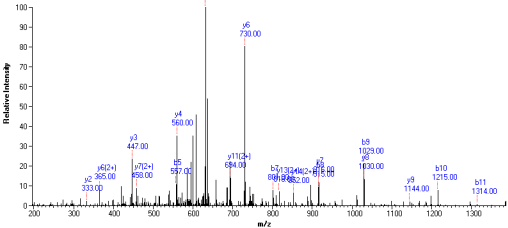

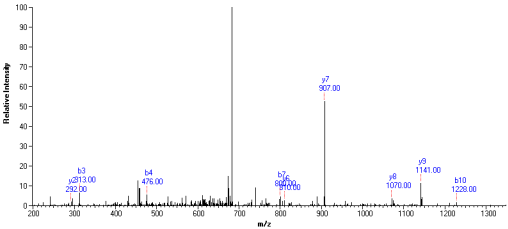

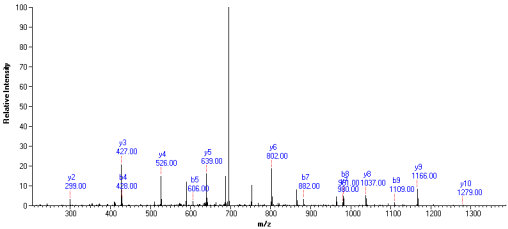

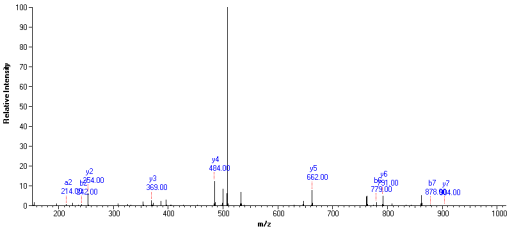

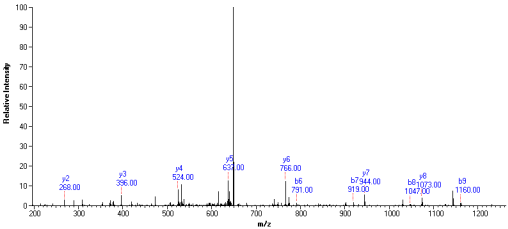

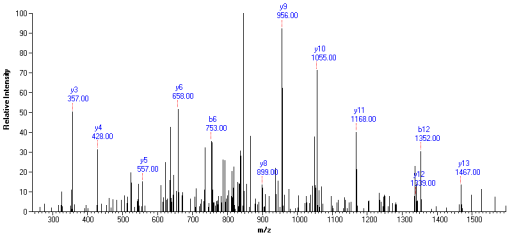



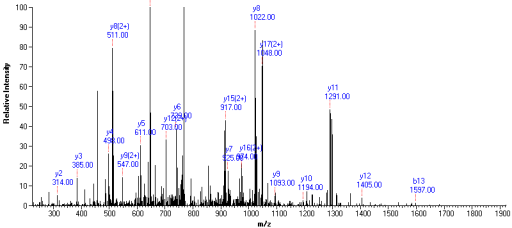

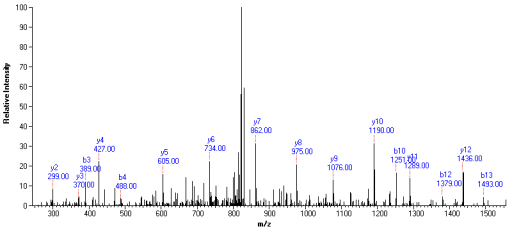

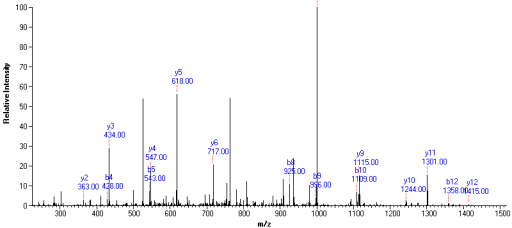

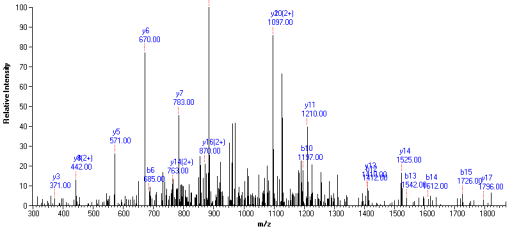

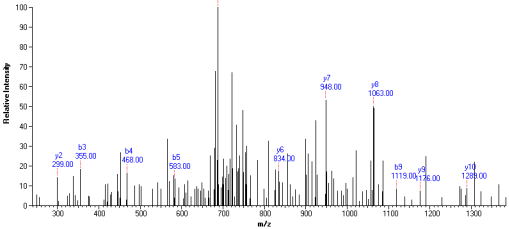

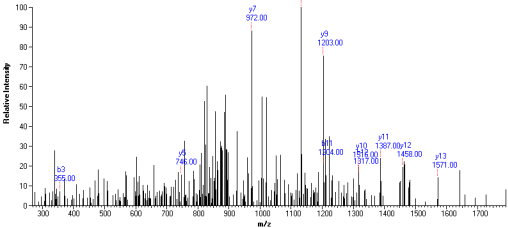

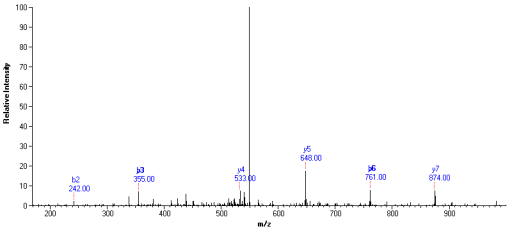

Peptide: \_QLLNEFPELK(ac)GVR\_Charge: 2+\_m/z: 801.95\_MassError: 0.022994406ppm\_RetentionTime: 34.055min\_MascotScore: 53.1

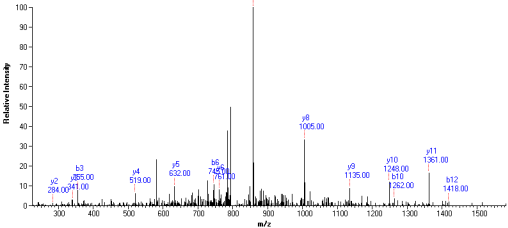



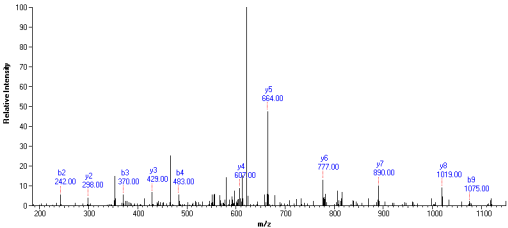

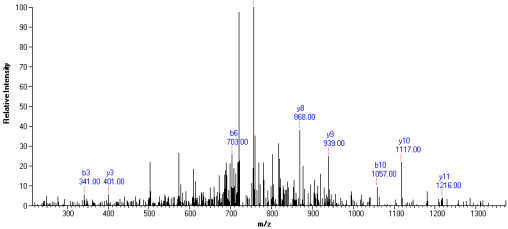

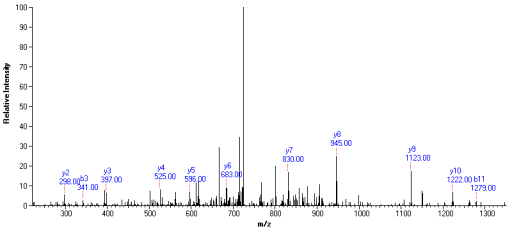

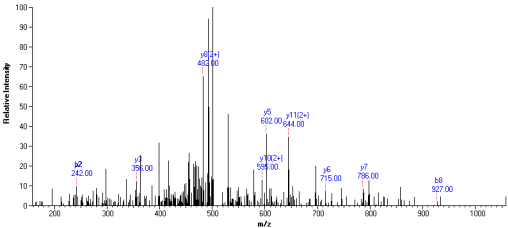

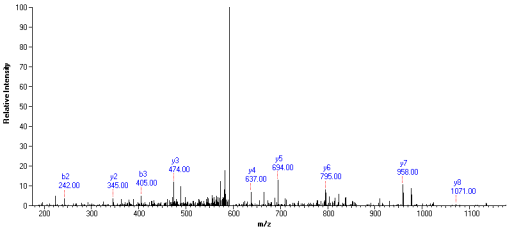

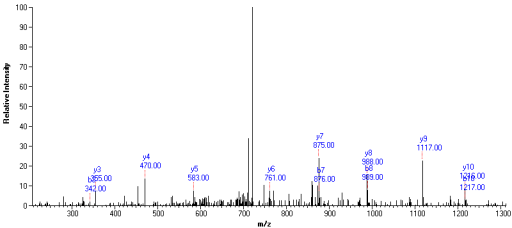

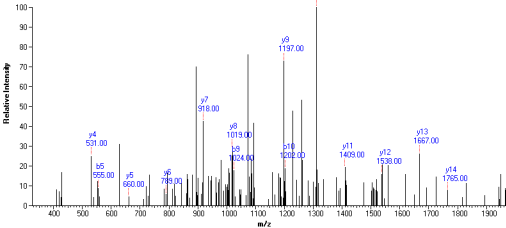

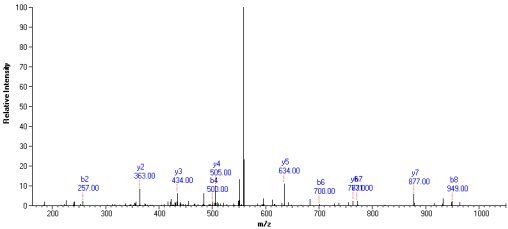



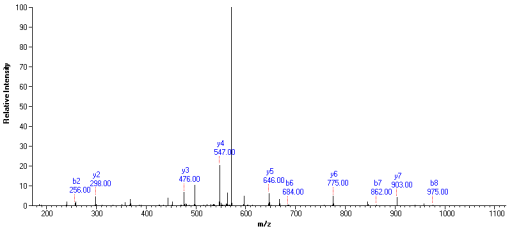

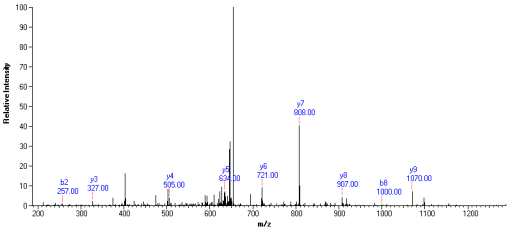

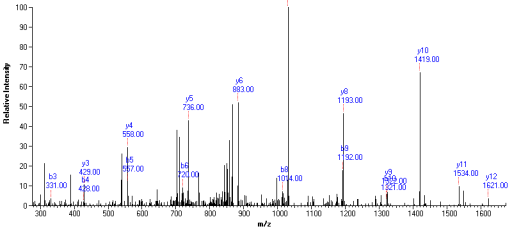

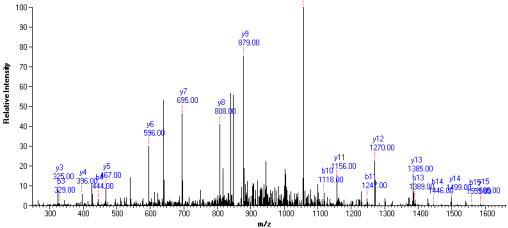

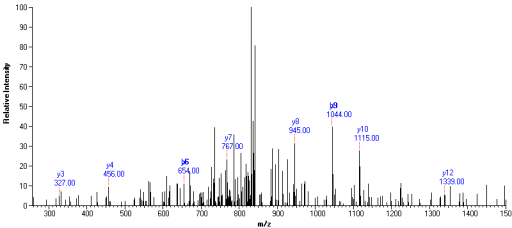

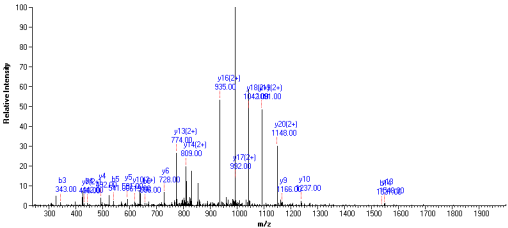

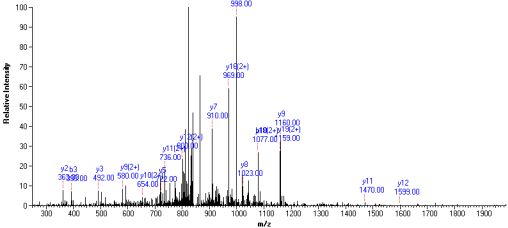

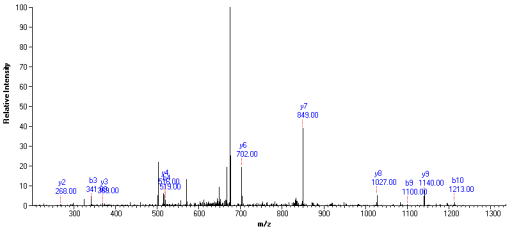



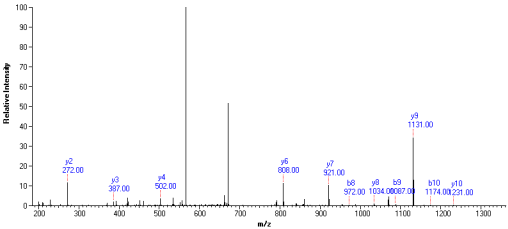

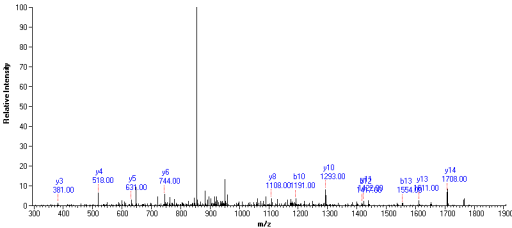

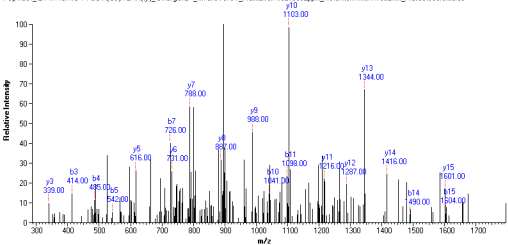

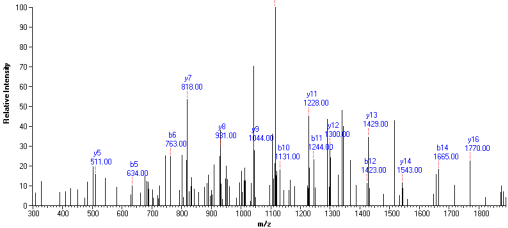

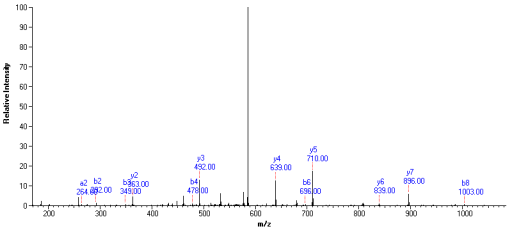

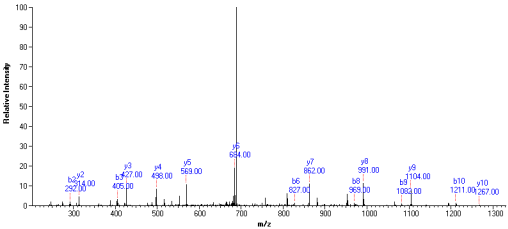

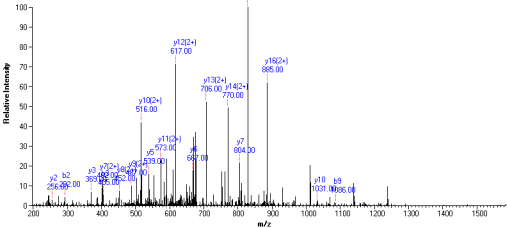

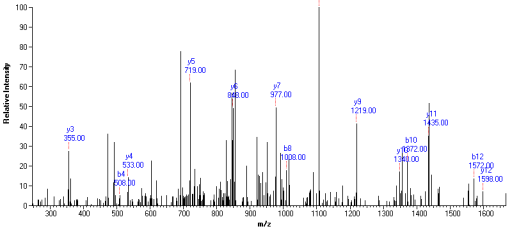



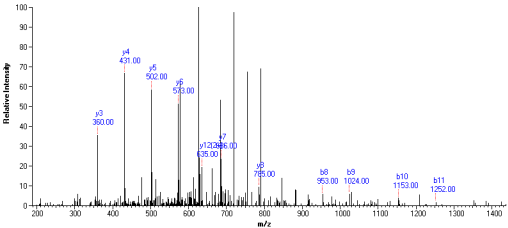

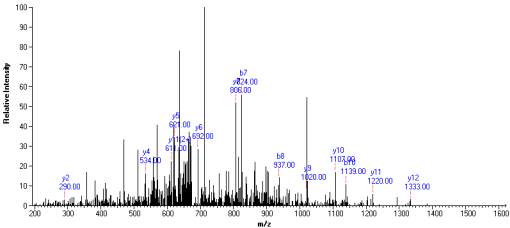

Peptide: \_RDGVVYLPCIK(ac)PEPR\_Charge: 3+ m/z: 623.67\_MassError:0.42806428ppm\_RetentionTime:30.296min\_MascotScore:24.44

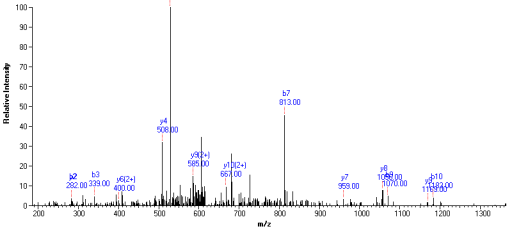

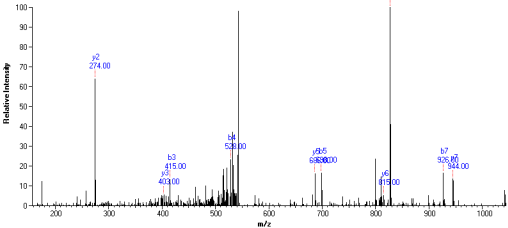

Peptide: \_REEK(ac)DGETVISWEK (y<sub>1</sub>-Charge: 2+ m/z: 887.45\_MassError: 0.64101522ppm\_RetentionTime: 19.131min\_MascotScore: 52.6

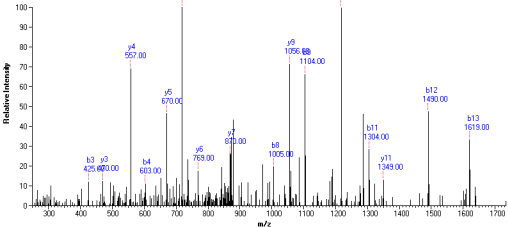

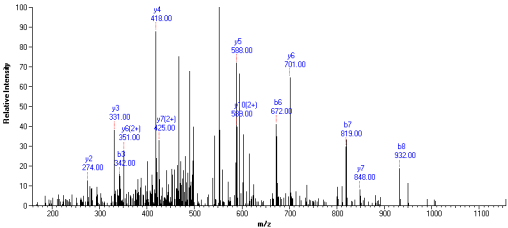

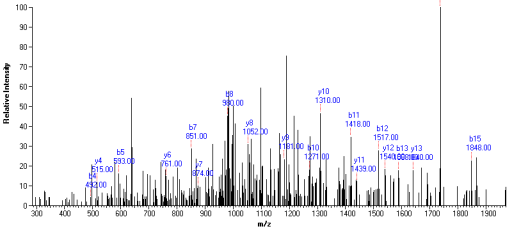

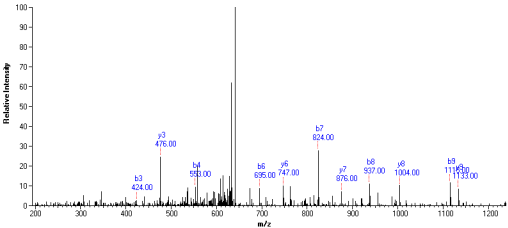



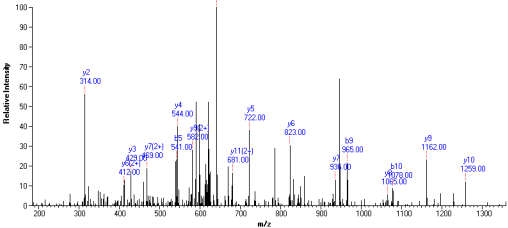

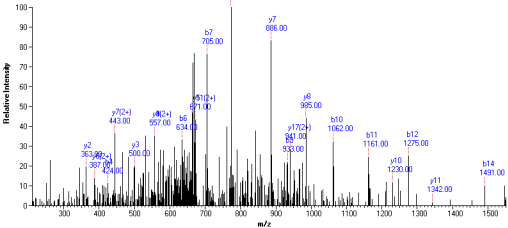

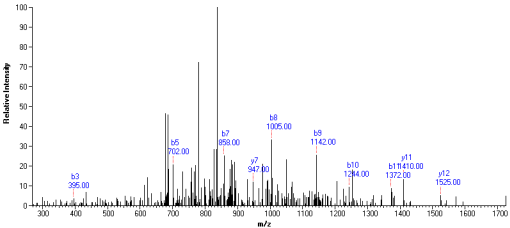

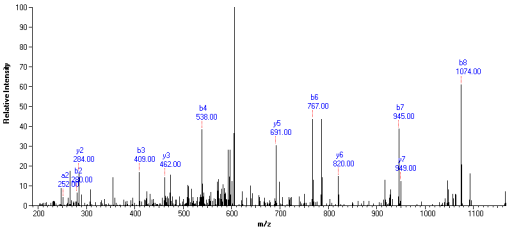

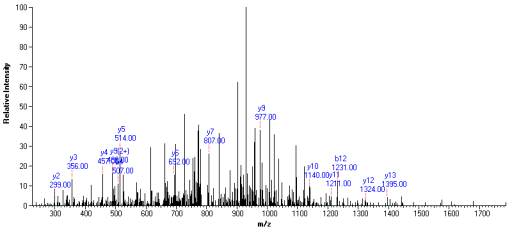

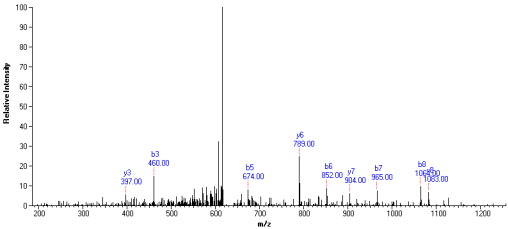

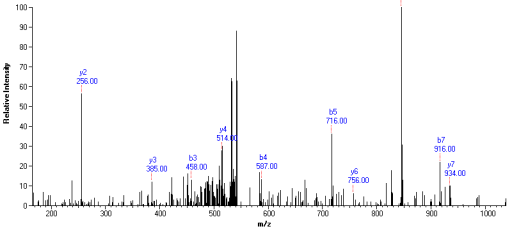

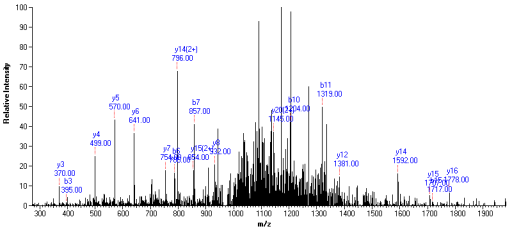



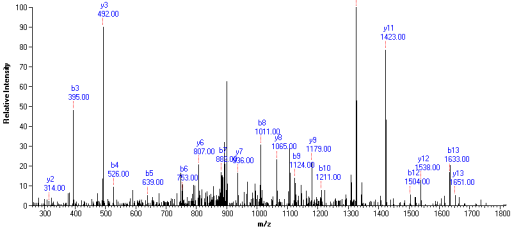

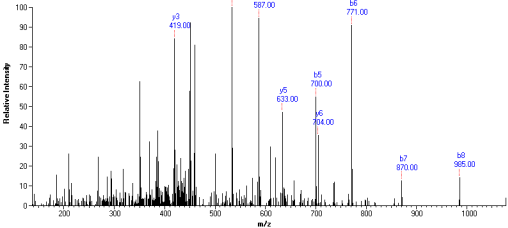

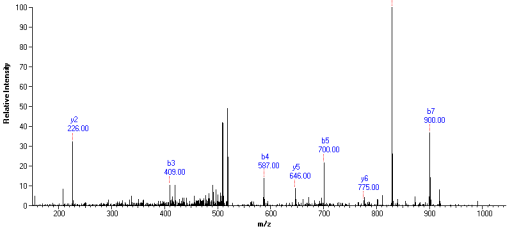

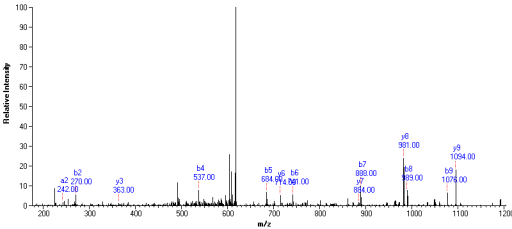

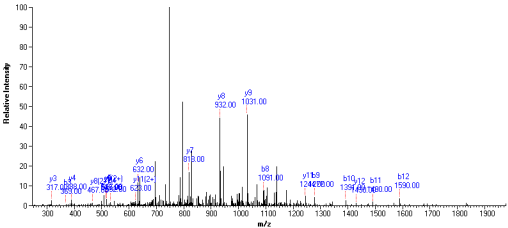

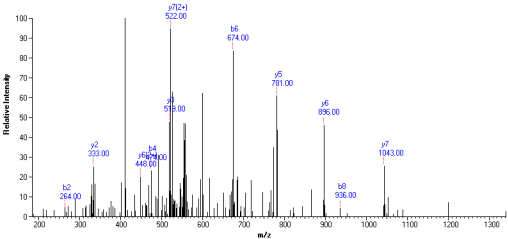

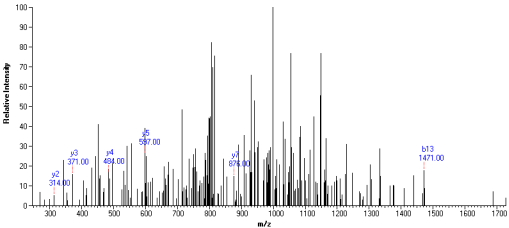

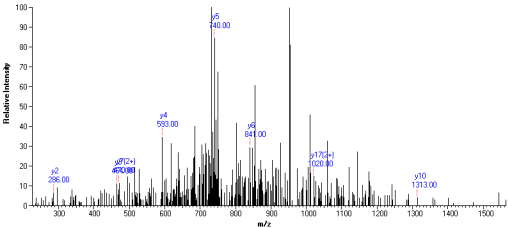



Peptide: **\_RYEDPDK(ac)E**\_Charge: 2+\_m/z: 556.26\_MassError: 3.2514226ppm\_RetentionTime: 11.527min\_MassotScore: 22.94

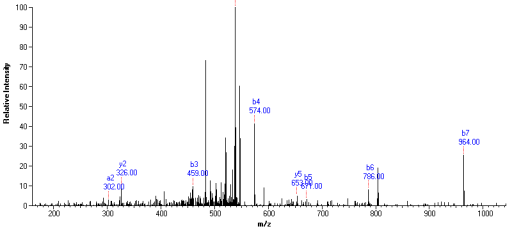

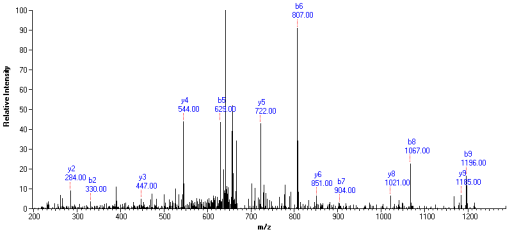

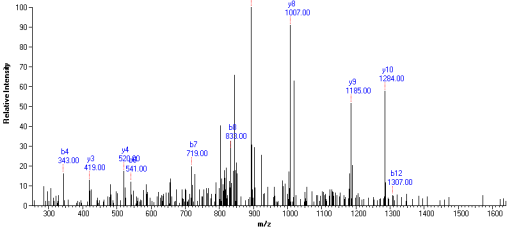

Peptide: \_SADK(ac)APLAAEAM(ox)GIIAPR\_Charge:2+\_m/z: 929.5\_MassError:0.18583672ppm\_RetentionTime:35.184min\_MascotScore:34.63

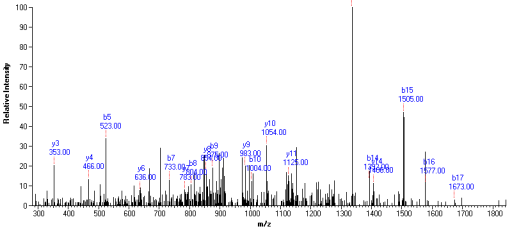

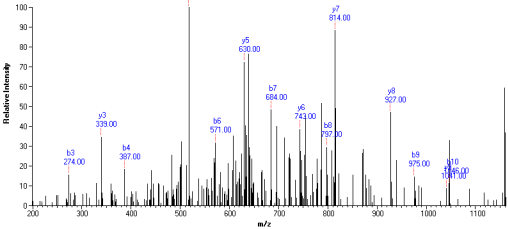

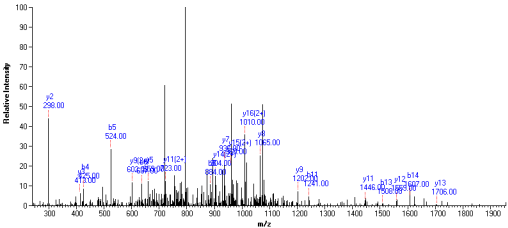

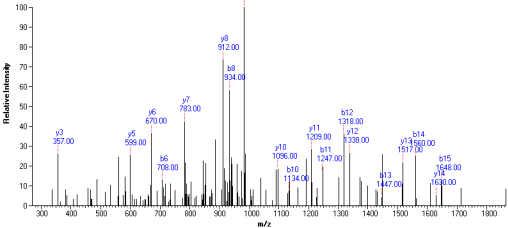

Peptide: \_SAEQLAQAWK(ac)YAQQGGR\_Charge: 2+ m/z: 976.49\_MassError: 2.0275653ppm\_RetentionTime: 35.11min\_MascotScore: 61.91

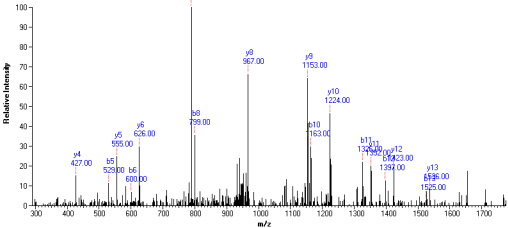



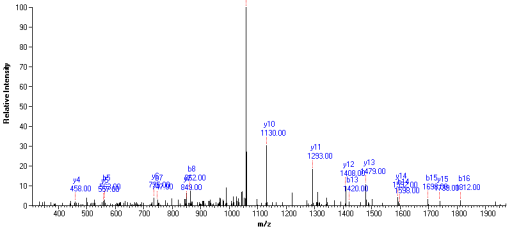

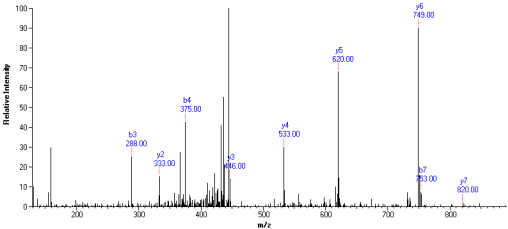

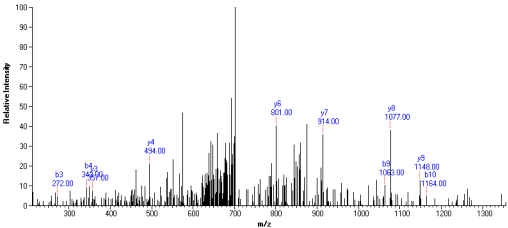

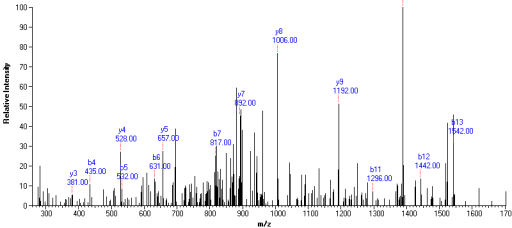

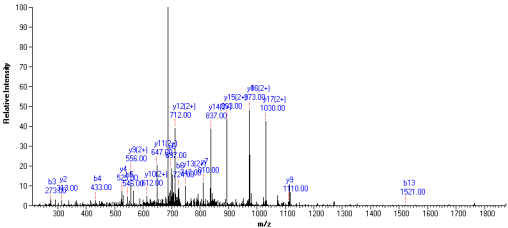

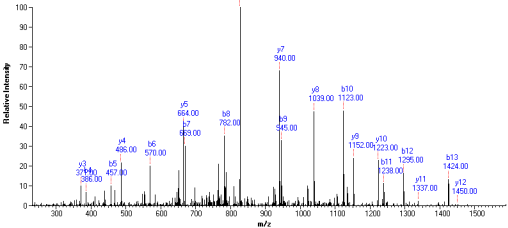

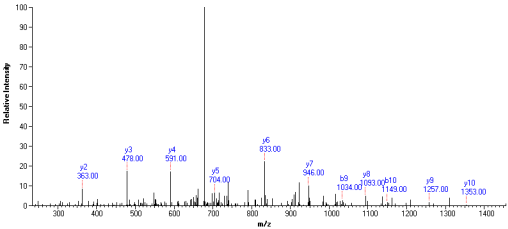

Peptide: \_SAQADLLNLK(ac)R\_Charge:2+\_m/z:644.87\_MassError:1.1488599ppm\_RetentionTime:27.868min\_MascotScore:55.46

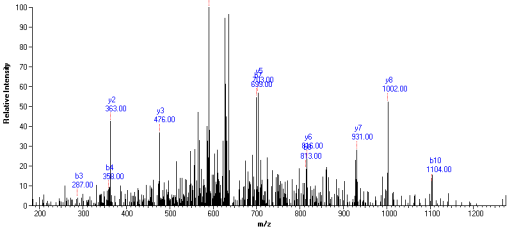



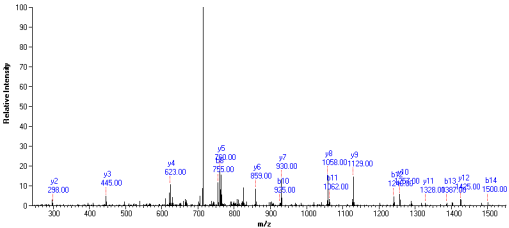

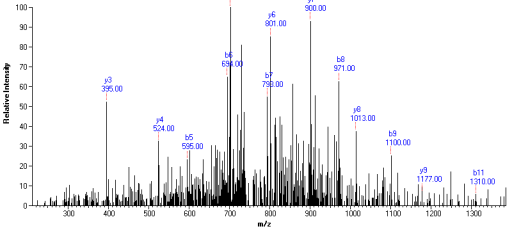

Peptide: \_SCEK(ac)AGVLAIEVR\_Charge: 2+\_m/z: 689.86\_Mass: Error: 1.1135501 ppm\_RetentionTime: 23.69min\_MascotScore: 85.34

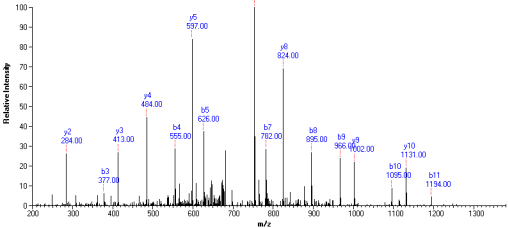

Peptide: \_SDK(ac)IIHLTDDSFDTDVLK(Iy)\_Charge:2+\_m/z:1061.04\_MassError:1.9200919ppm\_RetentionTime:39.503min\_MascotScore:69.1

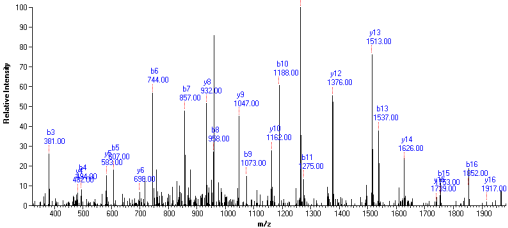

Peptide: \_SDLFNYNAGIVK(ac)NLVQQVAK(Iy)\_Charge:3+\_m/z:739.42\_MassError:2.8701799ppm\_RetentionTime:51.124min\_MaxcotScore:30.3

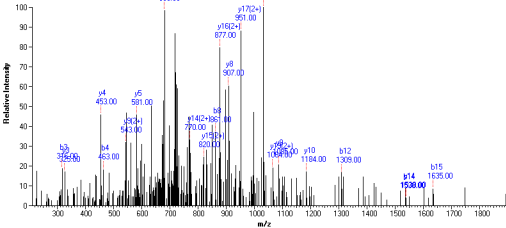

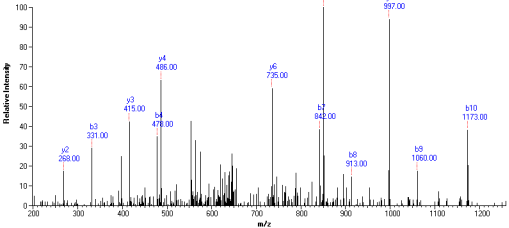

Peptide: \_SDVK(ac)LIFPNPK(Iy)\_Charge: 2+\_m/z: 658.38\_MassError: 0.46463615ppm\_RetentionTime: 31.375min\_MascotScore: 38.51

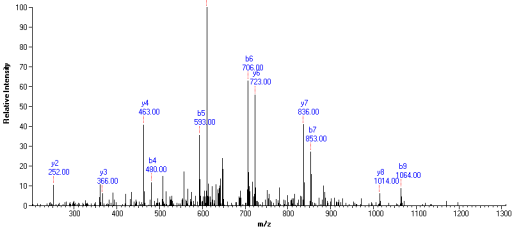

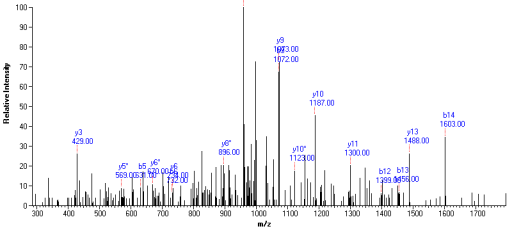



Peptide: \_SEALK(jac)ILNNIR\_Charge: 2+\_m/z: 665.89\_MassError: -0.95563281ppm\_RetentionTime: 30.68min\_MascotScore: 74.2

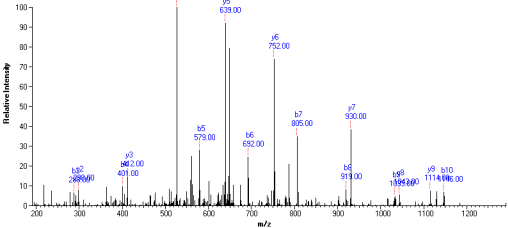

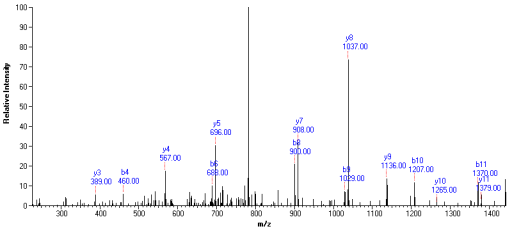

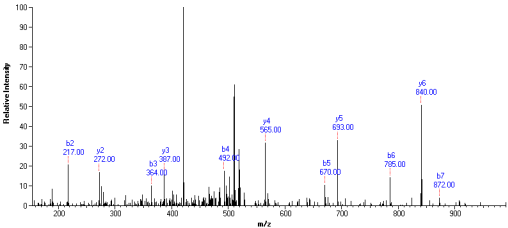

Peptide: \_SEITDEEYK(ac)EFYK(Iy)\_Charge:2+\_m/z:869.91\_MassError:1.8621701ppm\_RetentionTime:25.898min\_MascotScore:86.54

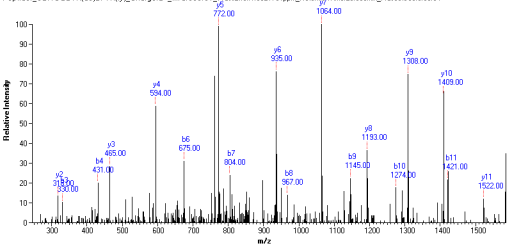

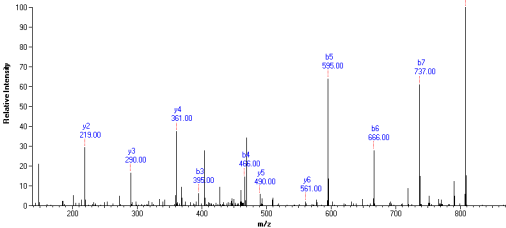

Peptide: \_SEK(ac)DSMGAIDV PADK(y) Charge: 2+ m/z: 810.89 MassError: 0.67705922ppm RetentionTime: 25.271min MascotScore: 85.11

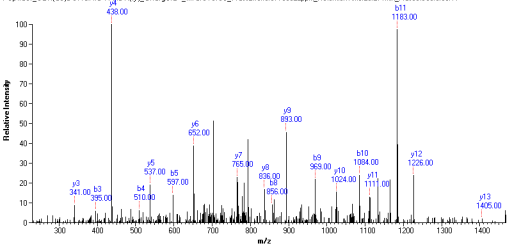

Peptide: \_SEK(ac)FM(ox)K(Iy)\_Charge: 2+\_m/z: 422.22\_MassError: 0.90016678ppm\_RetentionTime: 9.6046min\_MascotScore: 34.76

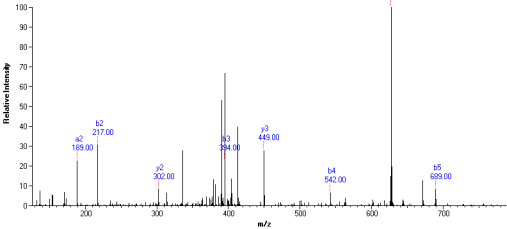

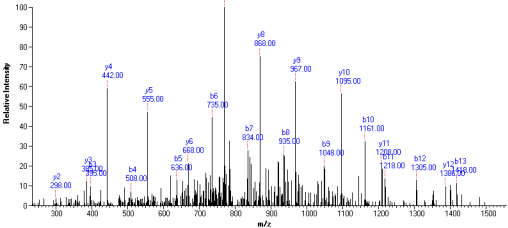



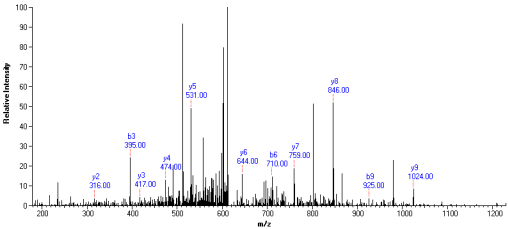

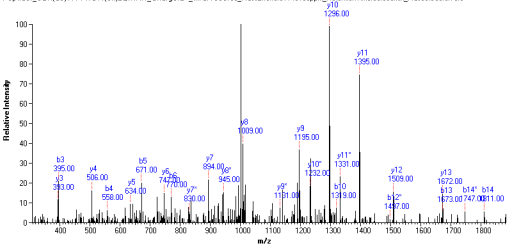

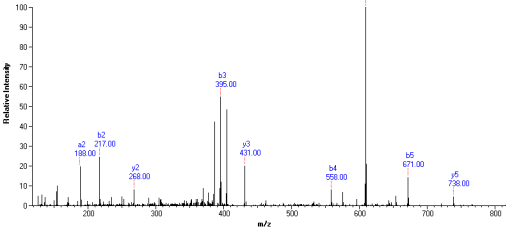

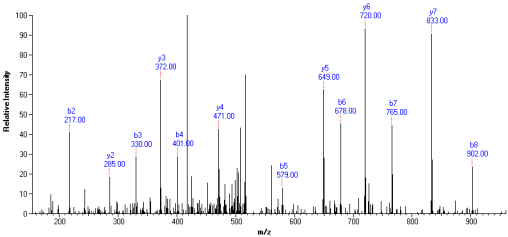

Peptide: \_SELNEK(ac)LATAWEGFTK(j)\_Charge: 2+\_m/z: 941.48\_MassErr: 2.7407023ppm\_RetentionTime: 41.131 min\_MascotScore: 83.83

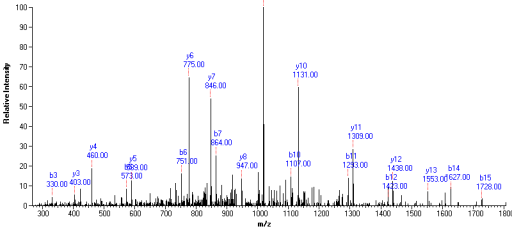

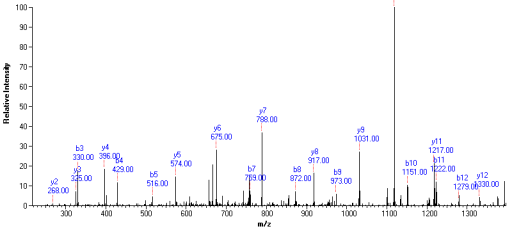

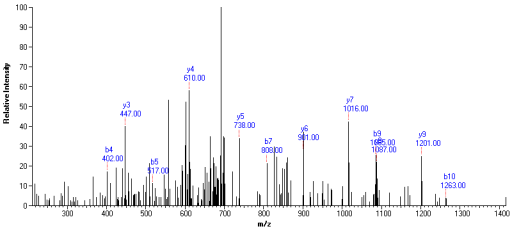

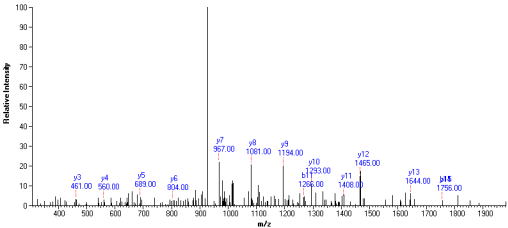



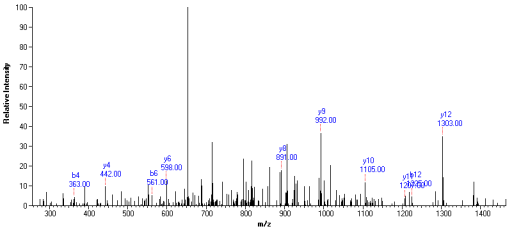

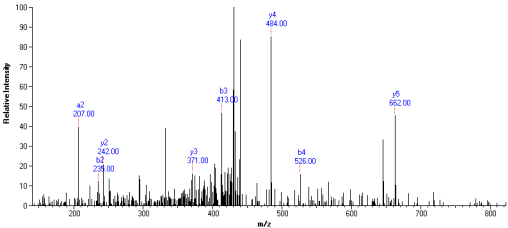

Peptide: \_SGAVK[ac]YALVVGSDVLR\_Charge: 2+ m/z: 883\_MassError: 1.9243353ppm\_RetentionTime: 44.452min\_MascotScore: 65.13

Relative Intensity

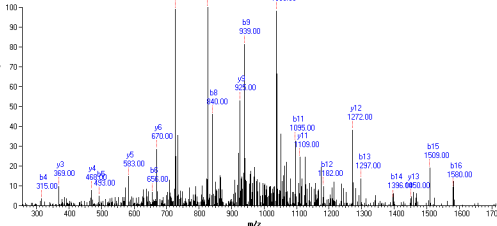

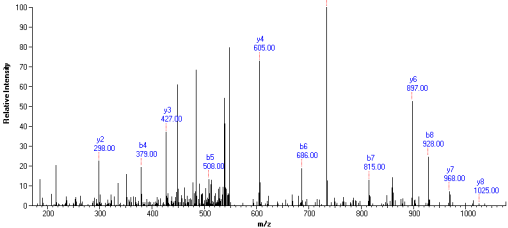

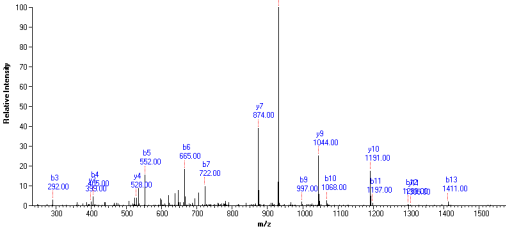

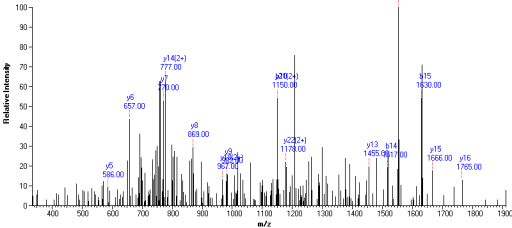

Peptide: \_SGILALLK(ac)R\_Charge: 2+\_m/z: 515.84\_MassError: -1.055204ppm\_RetentionTime: 35.735min\_MascotScore: 43.88

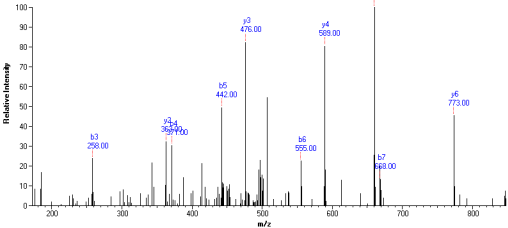

Peptide: \_SGITFSQELK(ac)DSGMR\_Charge: 2+\_m/z: 849.41\_MassError: 1.5393959ppm\_RetentionTime: 33.07min\_MascotScore: 45.06

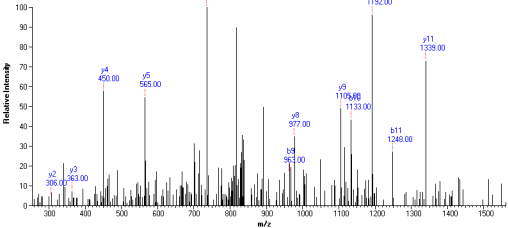



Peptide: \_SGK(ac)IMR\_Charge: 2+\_m/z: 376.22\_MassError: 3.1110867ppm\_RetentionTime: 7.1228min\_MaxcotScore: 47.19

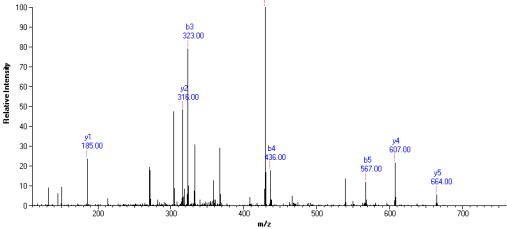

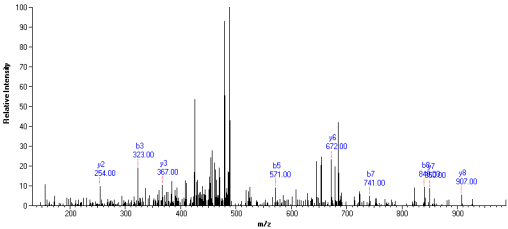

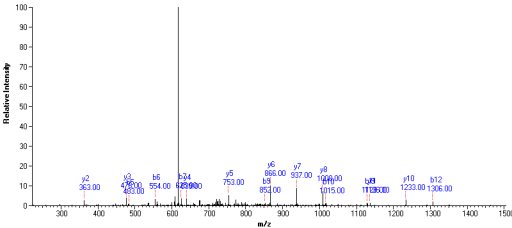

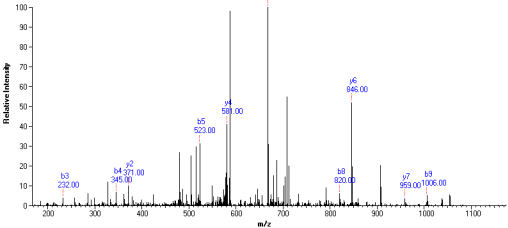

Peptide: \_SGTGSVDYAK(ac)ANIK(Iy)\_Charge: 2+\_m/z: 734.89\_MassError: 12441555ppm\_RetentionTime: 21.183min\_MascotScore: 75.25

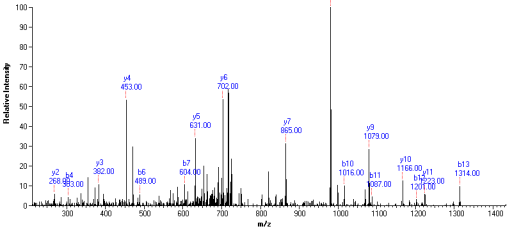

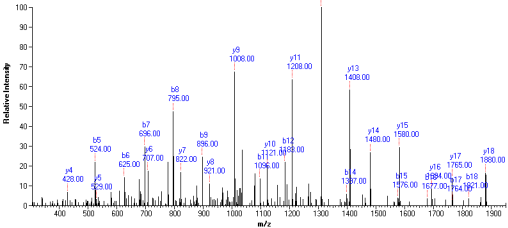

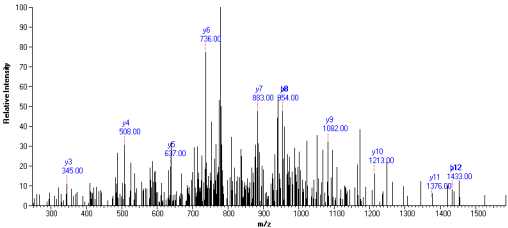

Peptide: \_SHHISVYEIVGEGQLLHEK(ac)GR\_Charge: 3+\_m/z: 817.1\_MassError: 1.775939ppm\_RetentionTime: 30.916min\_MascotScore: 61.04

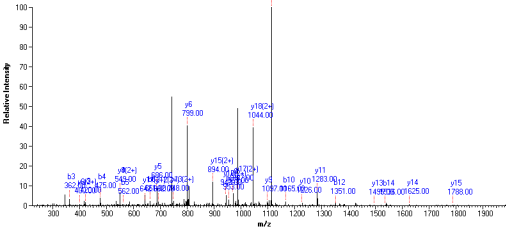



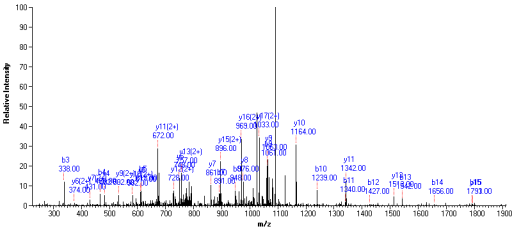

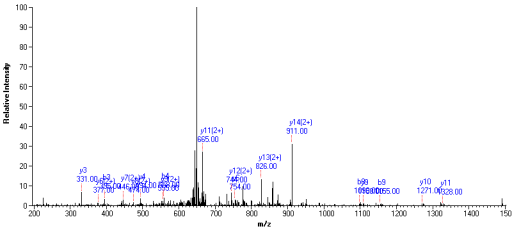

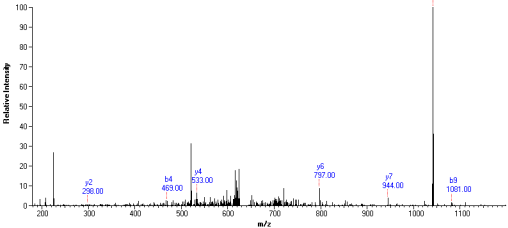

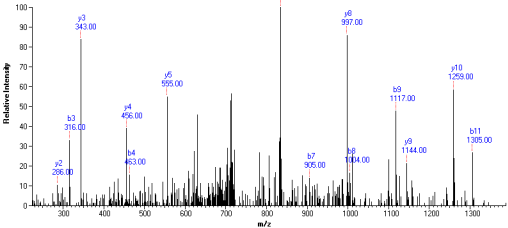

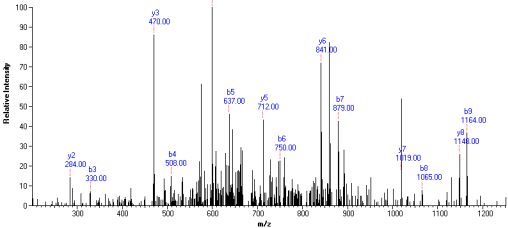

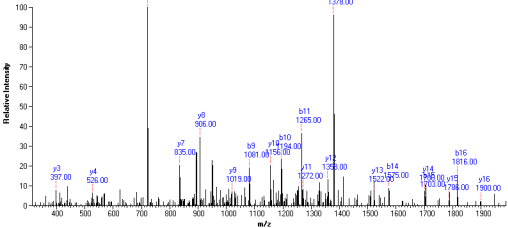

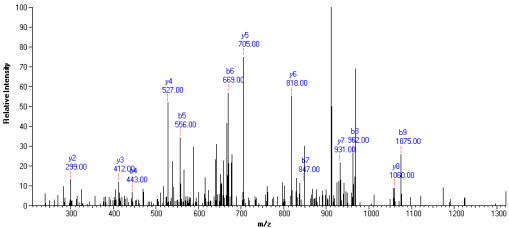

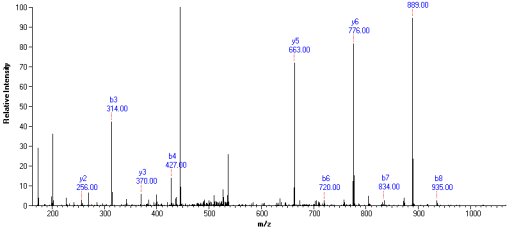



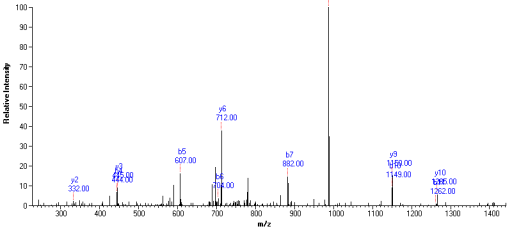

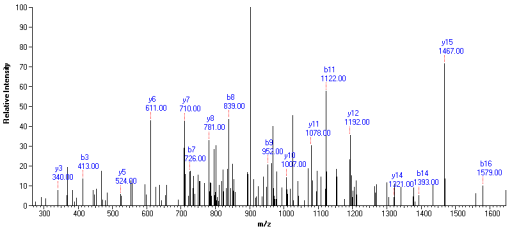

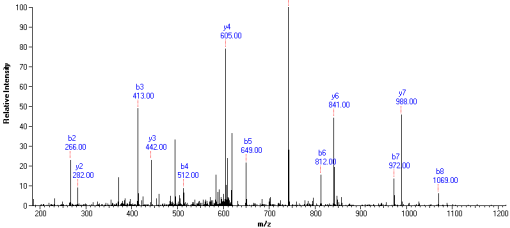

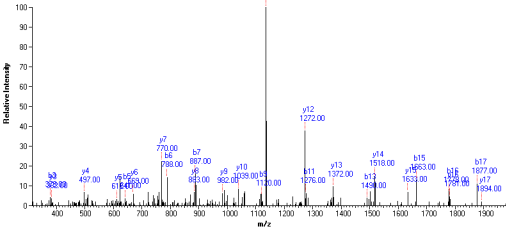

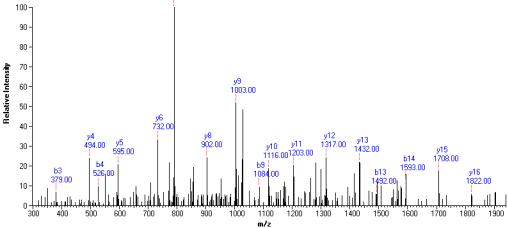

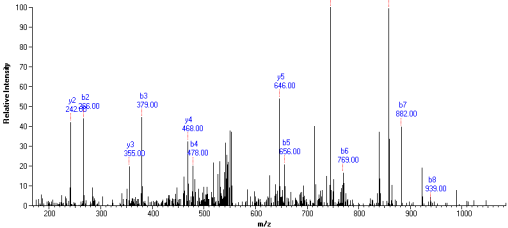

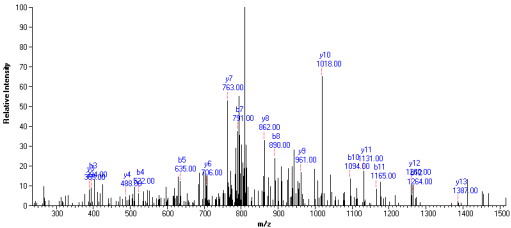

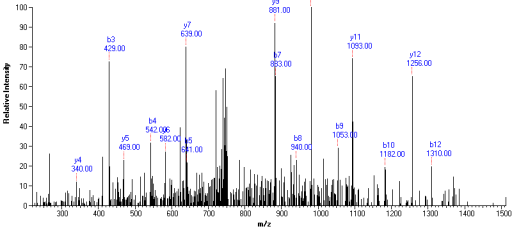



Peptide: \_SLADIGEALK(ac)TVLK(y)\_Charge: 2+\_m/z: 758.45\_MassError: 2.105234ppm\_RetentionTime: 47.089min\_MascotScore: 83.52

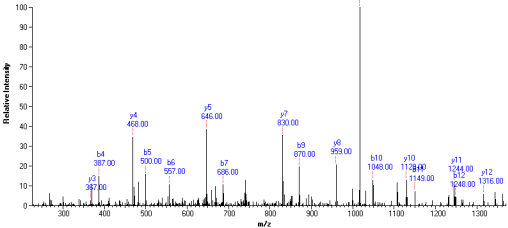

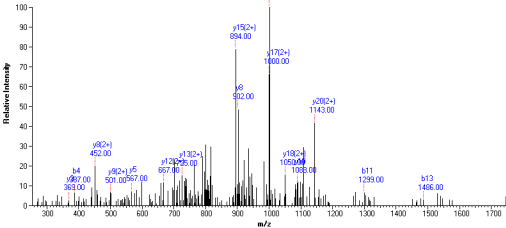

Peptide: SLAEQGVTK(ac)EVIPPYYSVK(Iy)\_Charge:2+\_m/z:1084.09\_MassError:1.9224204ppm\_RetentionTime:35.618min\_MascotScore:32.34

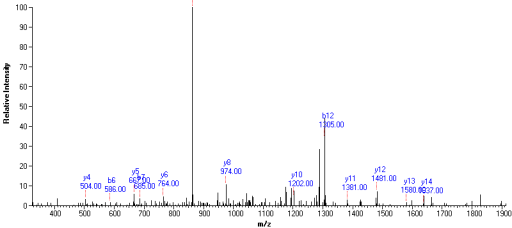

Peptide: \_SLAICTLLDK(ac)PSR\_Charge: 2+\_m/z: 767.43\_MassError: 1.7744698ppm\_RetentionTime: 33.921min\_MascotScore: 71.2

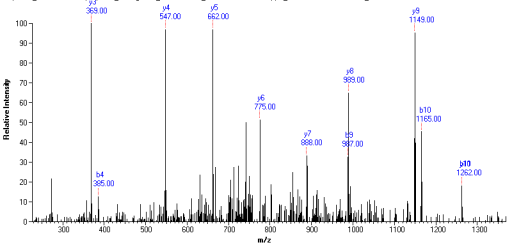

Peptide: \_SLDDFLIK(ac)Q\_Charge: 2+\_m/z: 564.81\_MassError: 0.76048564ppm\_RetentionTime: 40.783min\_MascotScore: 40.67

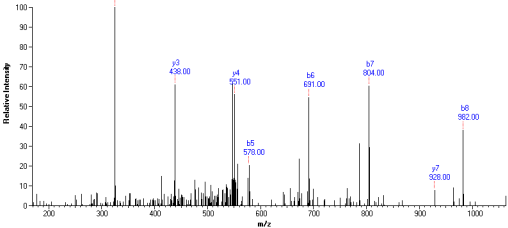

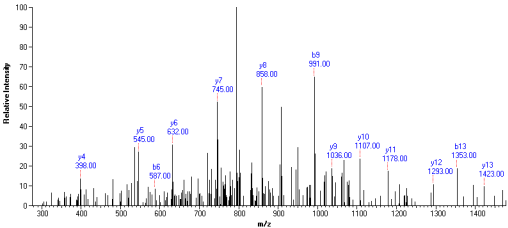

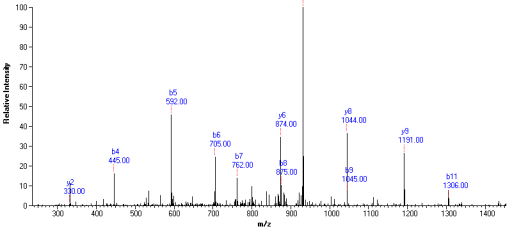

Peptide: \_SLFK(ac)MIK(Iy)\_Charge:2+\_m/z:462.78\_MassError:2.9651415ppm\_RetentionTime:26.213min\_MascotScore:46.28

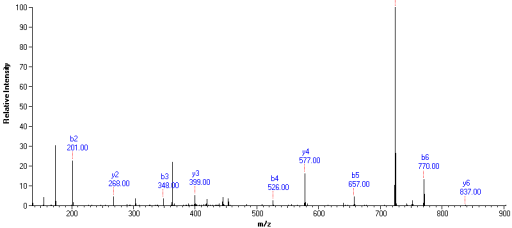



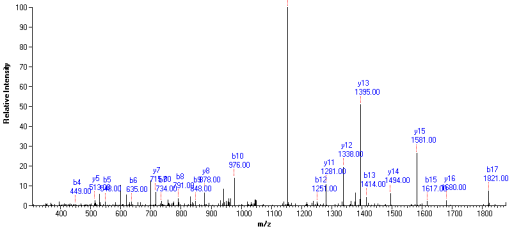

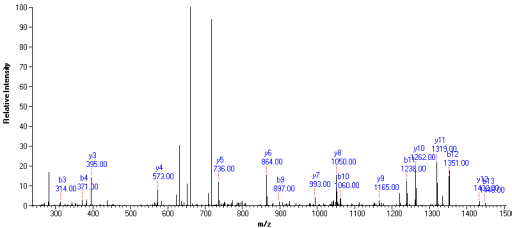

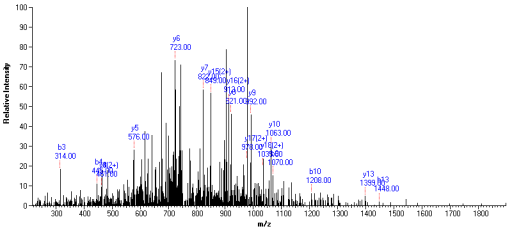

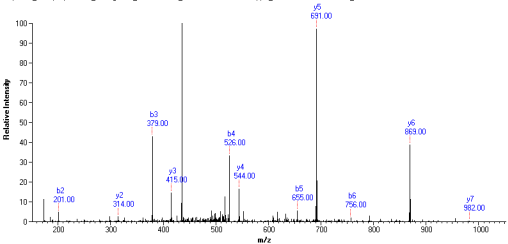

Peptide: \_SLK(ac)NYDIILNAQTTEVK(y)\_Charge:2+\_m/z: 973.06\_MassError:1.8742875ppm\_RetentionTime:37.52min\_MascotScore:35.51

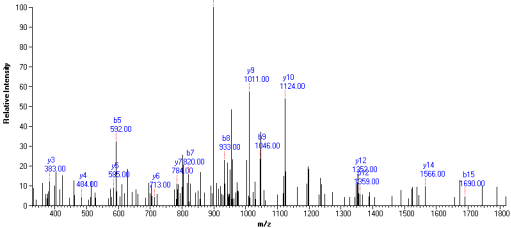

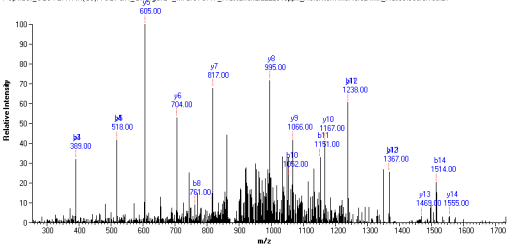

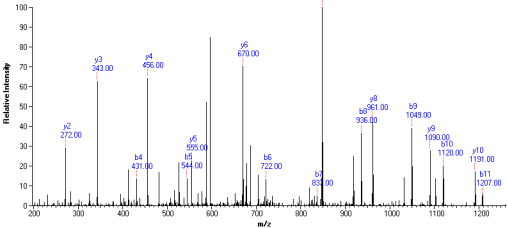

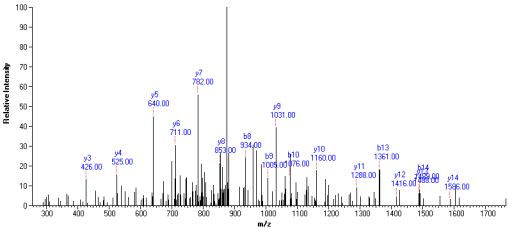



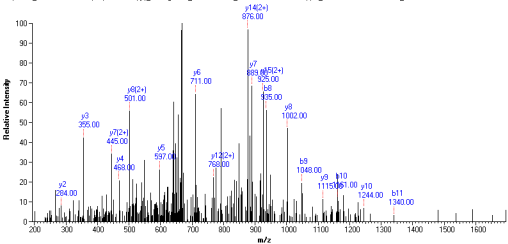

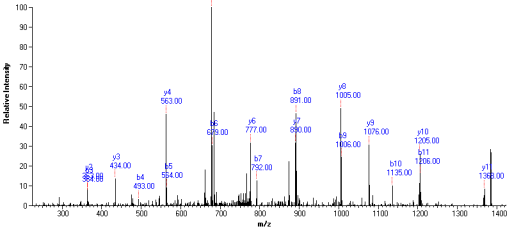

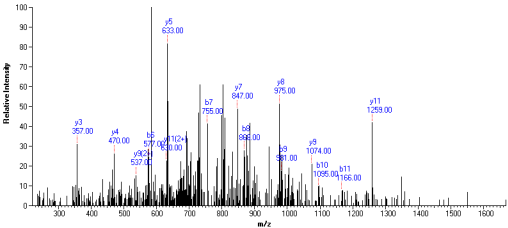

Peptide: \_SMEK(ac)PSDHAPVWATFR\_Charge:2+\_m/z: 959.96\_MassError:-0.72402615ppm\_RetentionTime:29.799min\_MascotScore:26.55

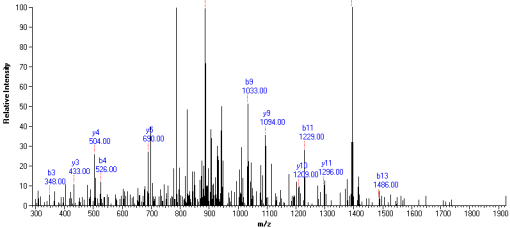

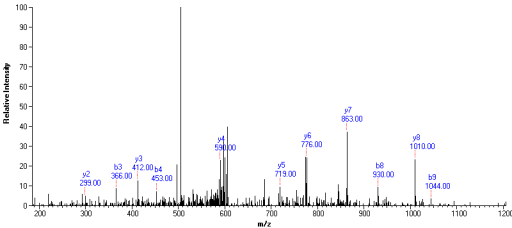

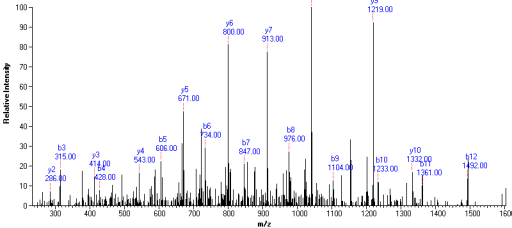

Peptide: \_SNK(IY)PFHYQAPFPLK(ac)K(IY)\_Charge: 3+\_m/z: 623.35\_MassError: 0.95549825ppm\_RetentionTime: 20.042min\_MascotScore: 31.49

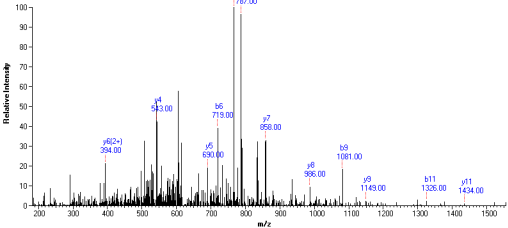

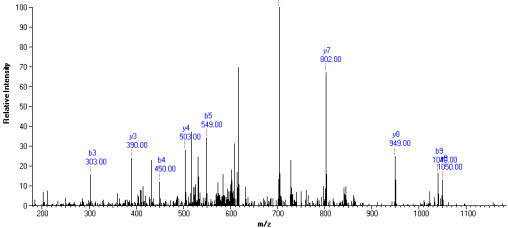



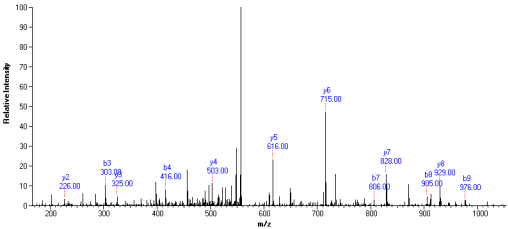

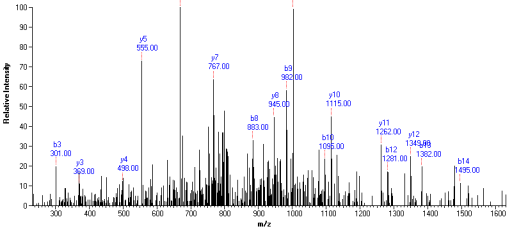

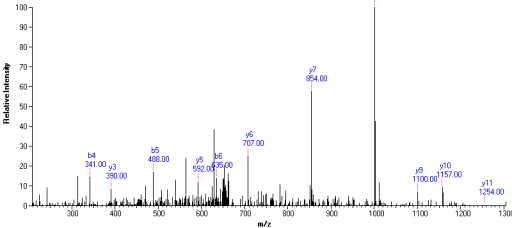

Peptide: \_SPK(ac)FGAIAGCMYTEGVVK(Iy)\_ Charge: 2+\_ m/z: 955\_MassError: 2109.945ppm\_RetentionTime: 30.575min\_MascotScore: 71.03

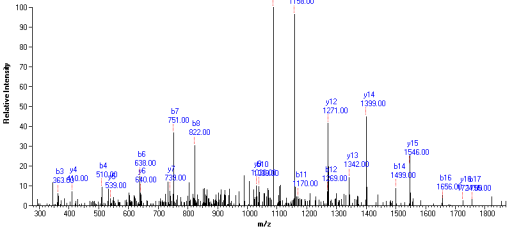

Peptide: \_SPVLLALDYNPTGDK(ac)EAPVYACLVGK(Iy)\_Charge: 3+\_m/z:950.17\_MassError:4.9323773ppm\_RetentionTime:49.607min\_MascotScore:43.23

Relative Intensity

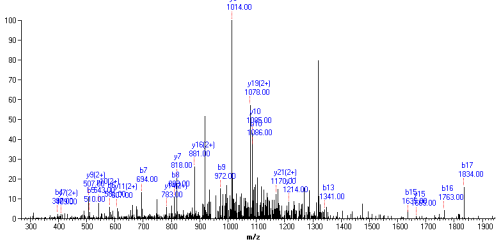

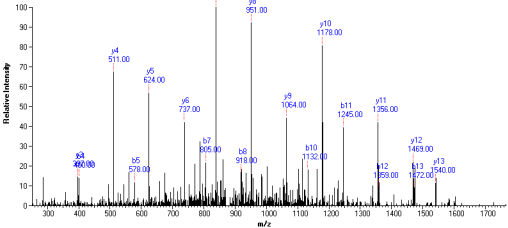

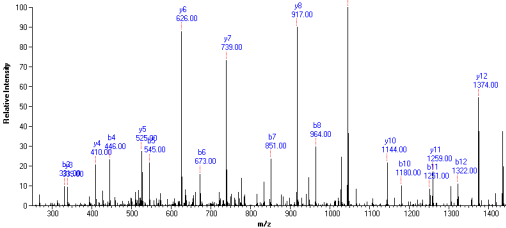

Peptide: \_SQGLDDYICK(ac)R\_Charge: 2+\_m/z: 707.84\_MassError: -0.62274259ppm\_RetentionTime: 25.473min\_MascotScore: 73.94

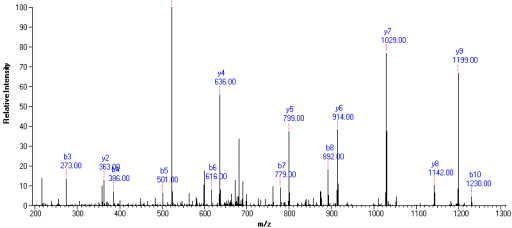



Peptide: \_SQLIDK(ac)IAAGADISK(I)\_Charge:2+\_m/z: 794.45\_MassError:1.3938888ppm\_RetentionTime:37.974min\_MascotScore:114.98

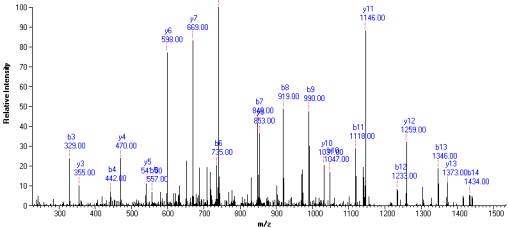

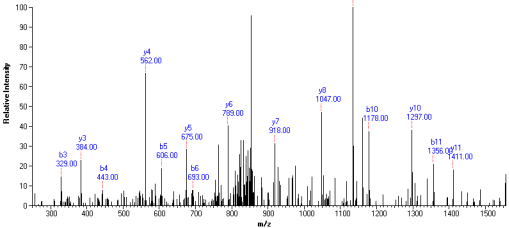

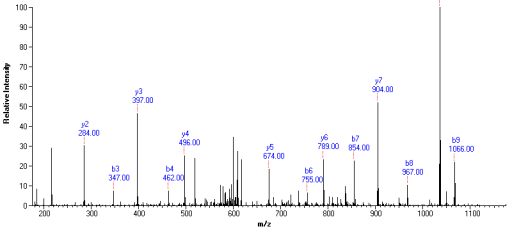

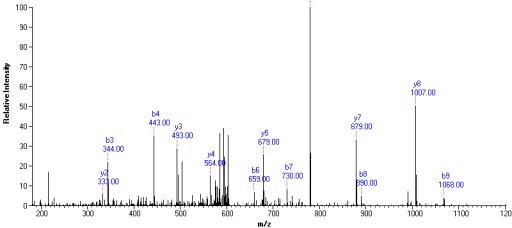

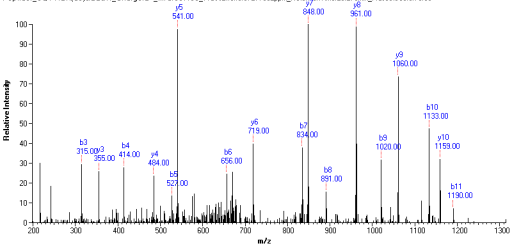

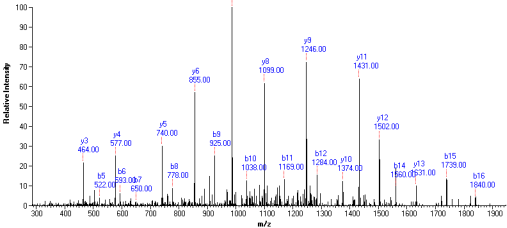

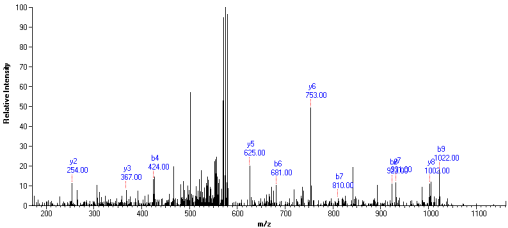

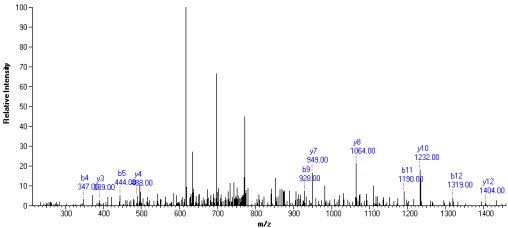



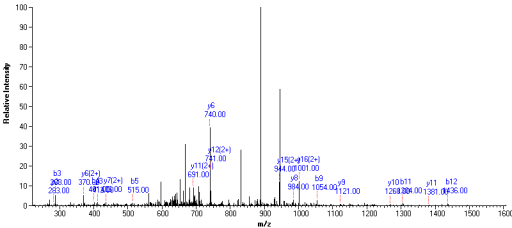

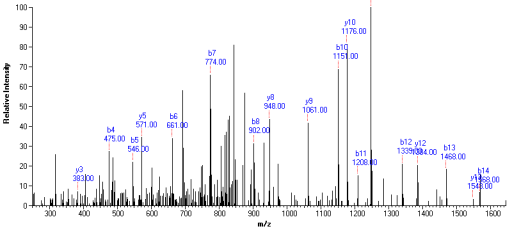

Peptide: \_STFQQLPGTGVK(ac)PDGFHSQTR\_Charge: 3+\_m/z: 807.08\_MassError: 1.3567114ppm\_RetentionTime: 27.417min\_MascotScore: 36.45

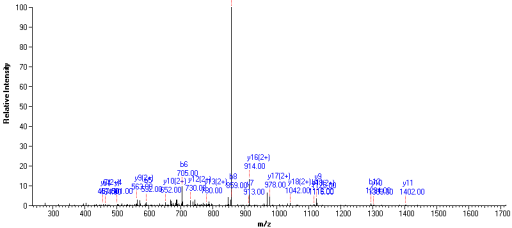

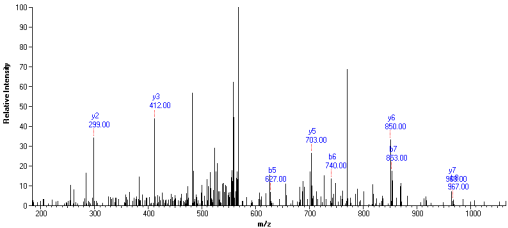

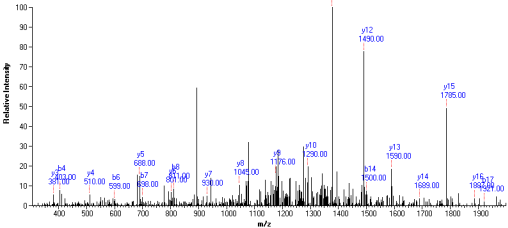

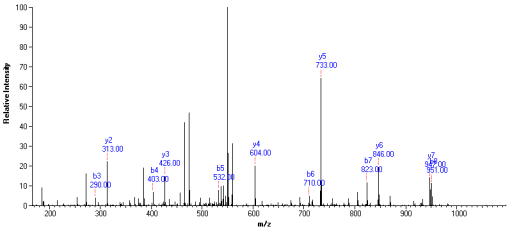

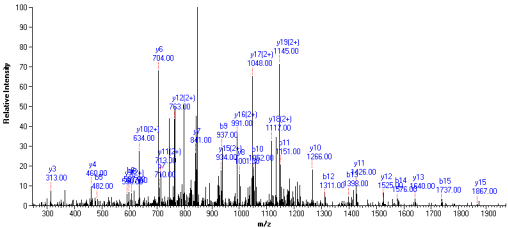

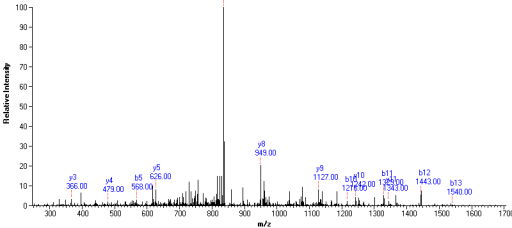



Peptide: \_SVADQLPK(ac)YVNLQQAIK(Iy)\_Charge: 2+\_m/z: 990.58\_MassError: 3.5485218ppm\_RetentionTime: 34.607min\_MascotScore: 24.98

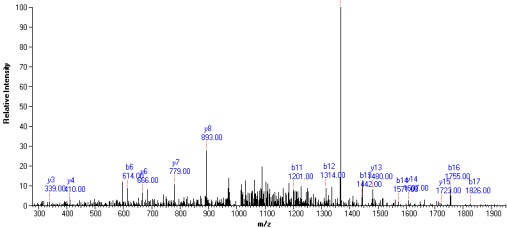

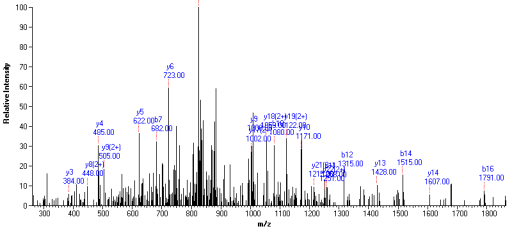

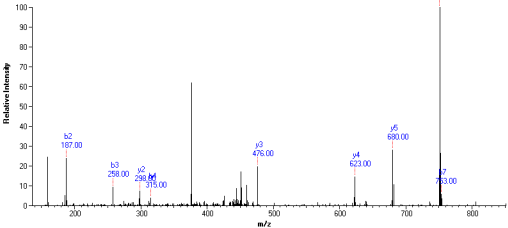

Peptide: \_SVEILGK[ac]\_Charge: 2+\_m/z: 462.76\_MassError: 1.6623181ppm\_RetentionTime: 30.282min\_MascotScore: 38.14

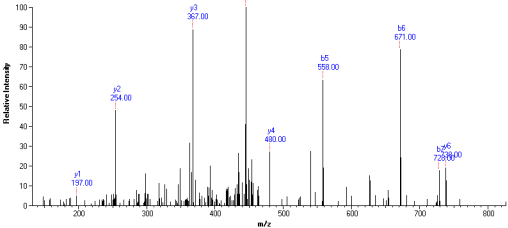

Peptide: \_SVEENLALFEK(ac)MR\_Charge: 2+\_m/z: 813.42\_MassError: 1.1607415ppm\_RetentionTime: 41.325min\_MascotScore: 39.14

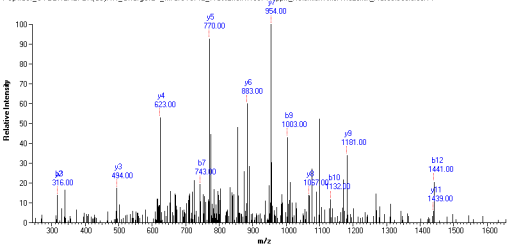

Peptide: \_SVEFAVFAGPANDPK(ac)GR\_Charge:2+\_m/z:911.47\_MassError:1.1154651ppm\_RetentionTime:34.753min\_MascotScore:54.1

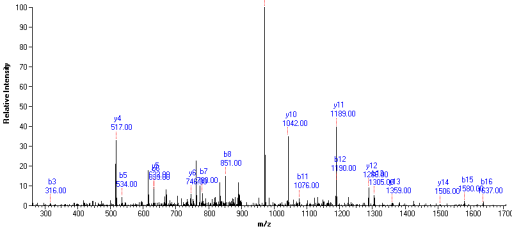

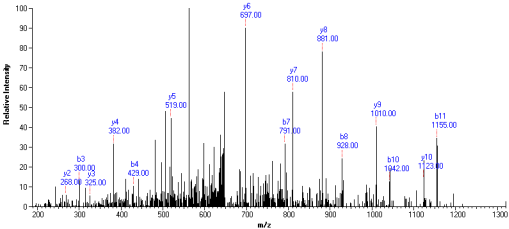

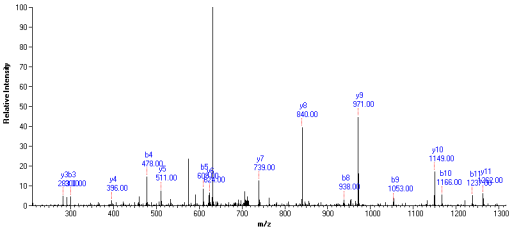



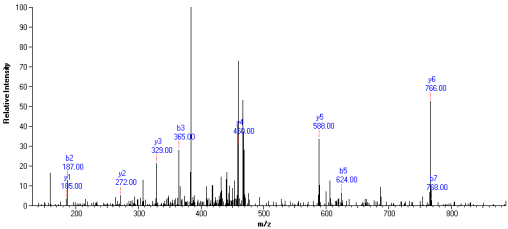

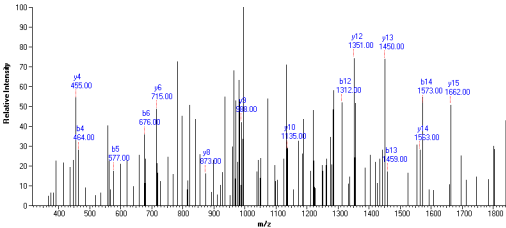

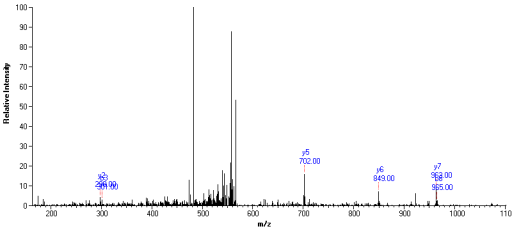

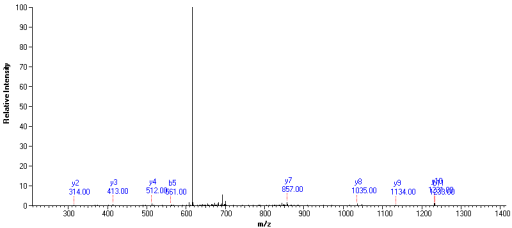

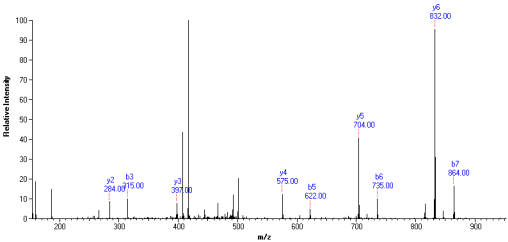

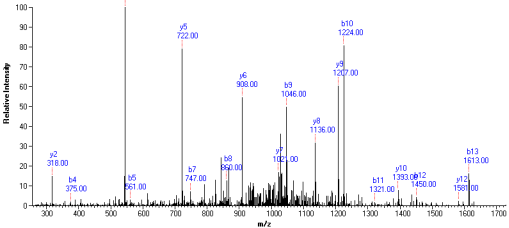

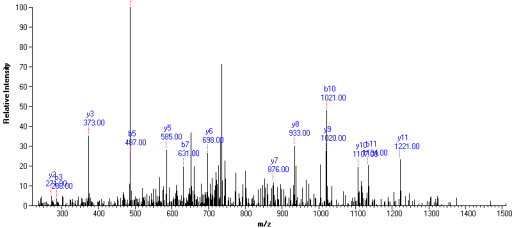

Peptide: \_SWK(ac)LNER\_Charge:2+\_m/z: 496.77\_MassError:0.8567119ppm\_RetentionTime:20.131min\_MascotScore:28.25

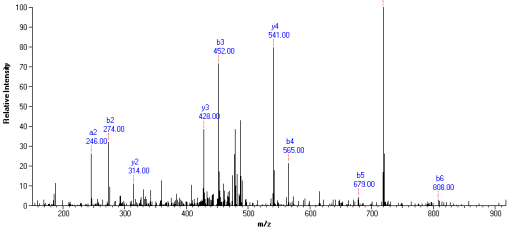



Peptide: \_SWSFGGEVK(ac)K(Iy)PETINYR\_Charge: 3+\_m/z: 670.35\_MassError: 1.2315392ppm\_RetentionTime: 25.879min\_MascotScore: 33.54

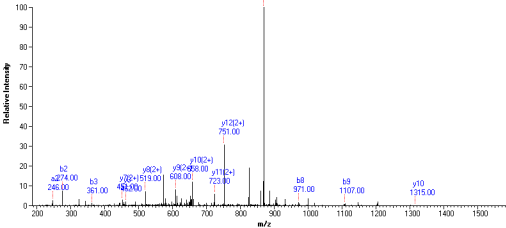

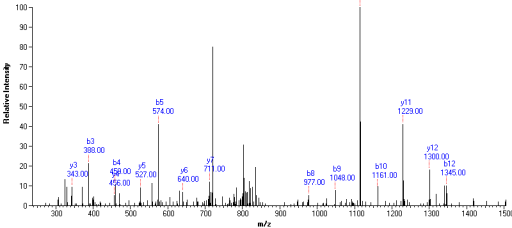

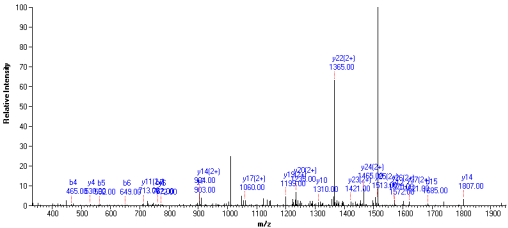

Peptide: \_TAAALHILVK(ac)EEK(Iy)\_Charge:2+\_m/z:740.94\_MassError:1.668799ppm\_RetentionTime:25.009min\_MascotScore:88.42

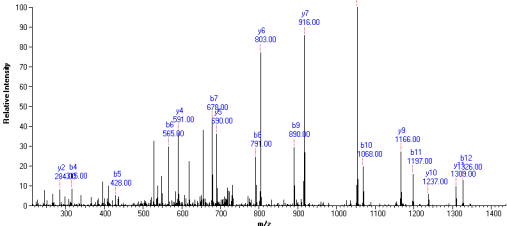

Peptide: \_TAAILLDTK(ac)GPEIR\_Charge:2+\_m/z:779.45\_MassError:2.2937954ppm\_RetentionTime:32.754min\_MascotScore:81.95

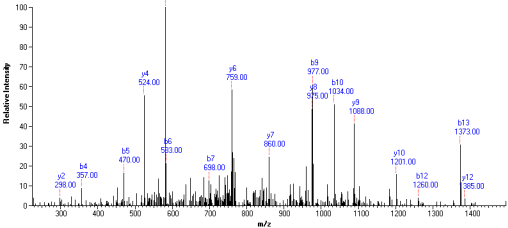

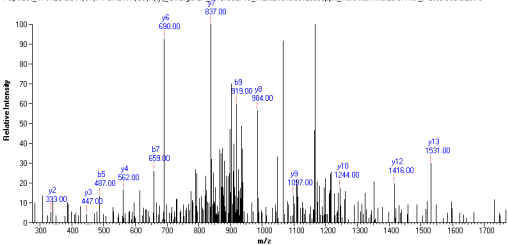

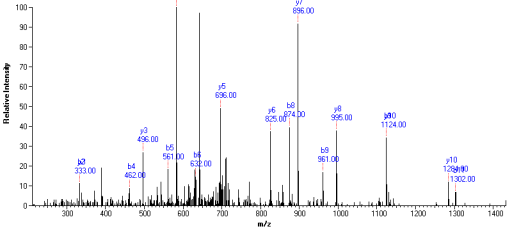

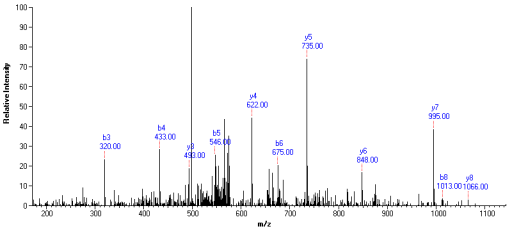



Relative Intensity

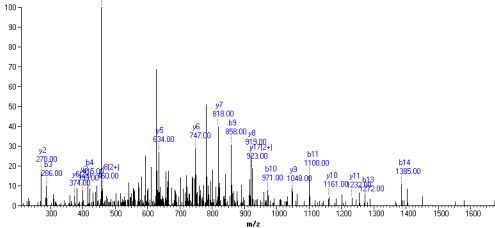

Peptide: \_TAISQFEGYIK(ac)LNK(Iy)\_Charge:2+\_m/z: 835.46\_MassError:3.40133ppm\_RetentionTime:34.297min\_MascotScore:49.99

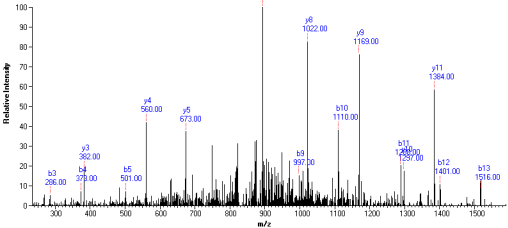

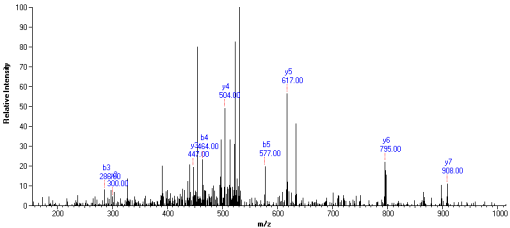

Peptide: \_TALYTK(ac)AEQQLDK(Iy)\_Charge:2+\_m/z:783.92\_MassError:1.954996ppm\_RetentionTime:29.79min\_MascotScore:77.89

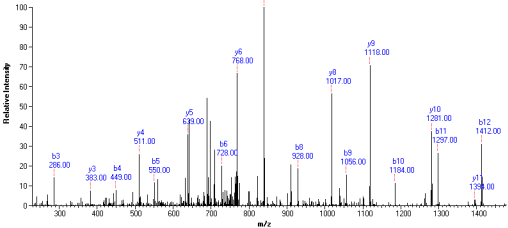

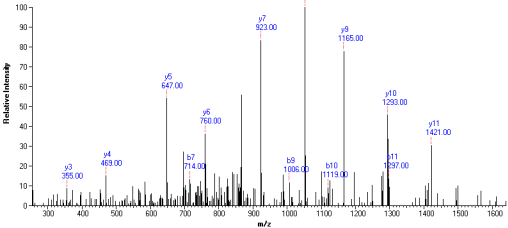

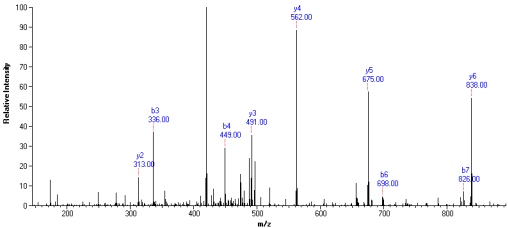

Peptide: \_TCEK(ac)AGIELTLFHGR\_Charge: 3+\_m/z: 597.98\_MassError: 0.30894616ppm\_RetentionTime: 33.35min\_MascotScore: 73.51

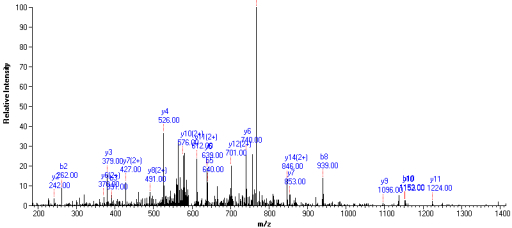

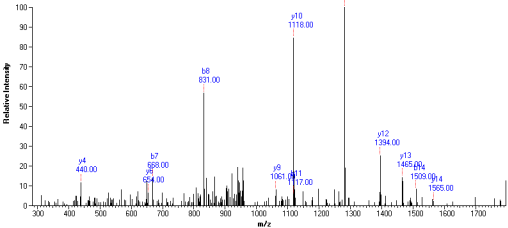



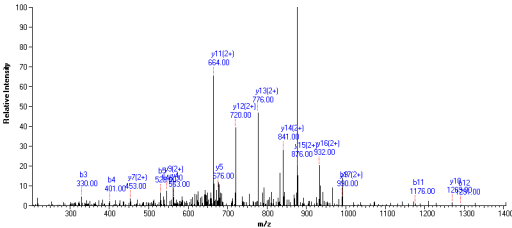

Peptide: \_TDIDK(ac)IR\_Charge: 2+\_m/z: 460.76\_MassError: 2.4826673ppm\_RetentionTime: 11.977min\_MascotScore: 42.71

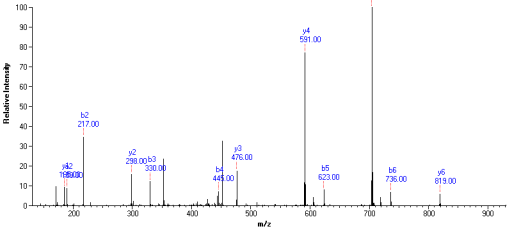

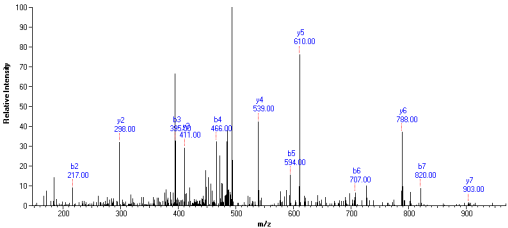

Peptide: \_TDK(ac)DSLFWGEQTIER\_Charge: 2+\_m/z: 943.46\_MassError: 4.8949757ppm\_RetentionTime: 33.449min\_MascotScore: 20.31

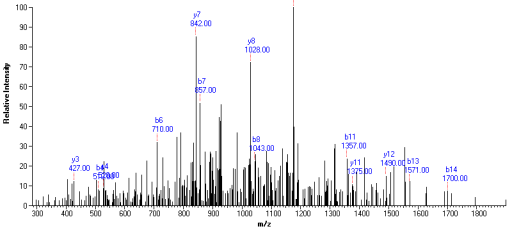

Peptide: \_TDK(ac)FIVR\_Charge: 2+\_m/z: 460.76\_MassError: 0.57640943ppm\_RetentionTime: 16.539min\_MascotScore: 51.74

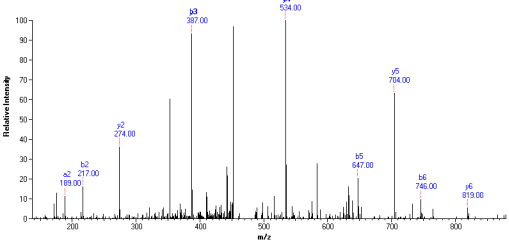

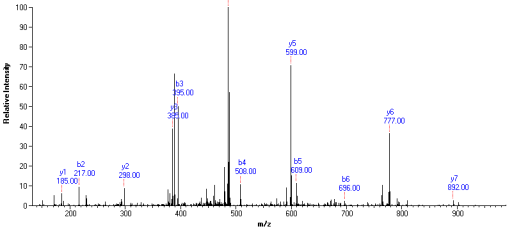

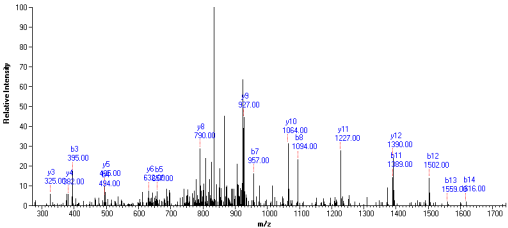

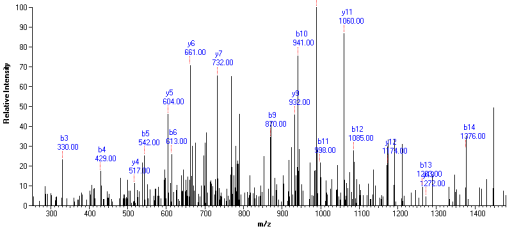



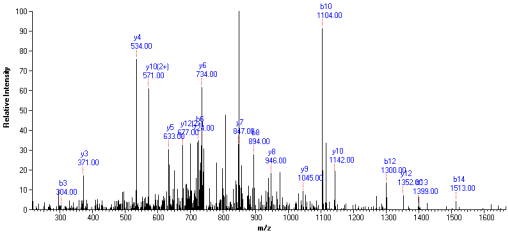

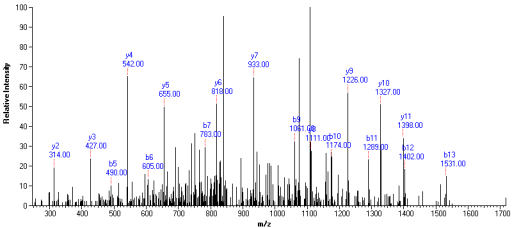

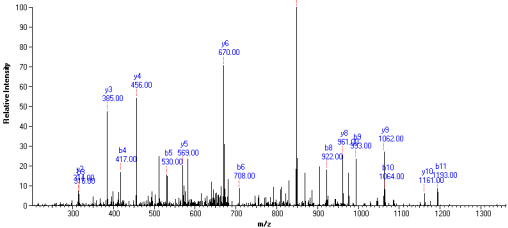

Peptide: \_TEFDVILK(ac)AAGANK(Iy)\_Charge: 2+\_m/z: 767.93\_MassError: 1.8844341ppm\_RetentionTime: 34.558min\_MascotScore: 101.76

Relative Intensity

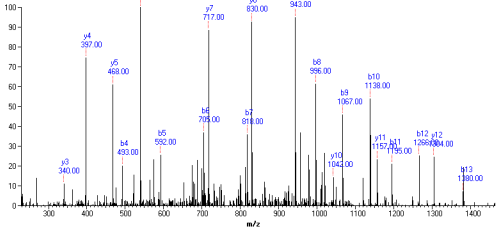

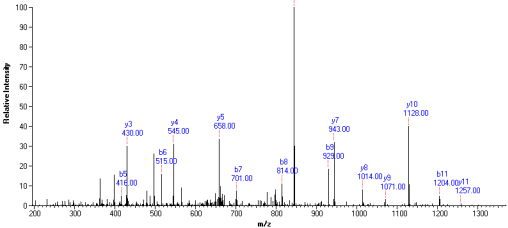

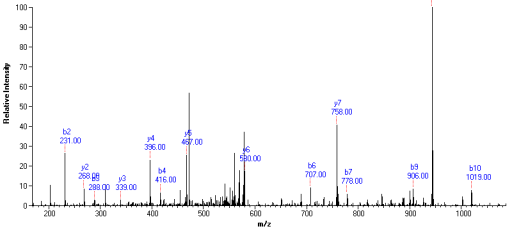

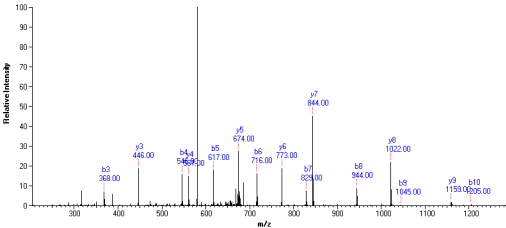

Peptide: \_TEIDK(ac)HIYLR\_Charge: 3+\_m/z: 449.92\_MassError: 0.63258639ppm\_RetentionTime: 23.548min\_MascotScore: 24.41

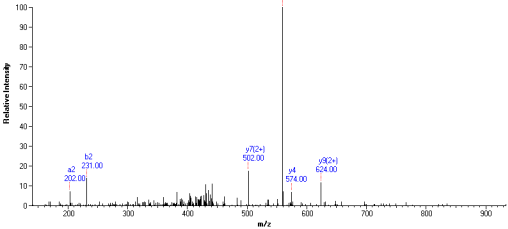



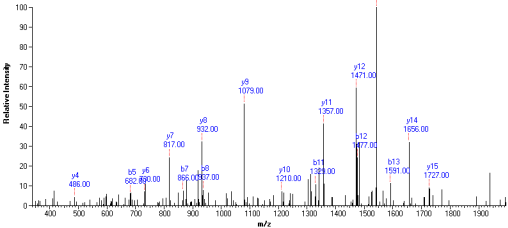

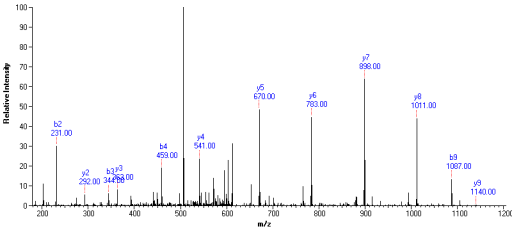

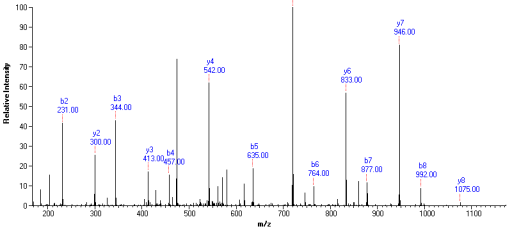

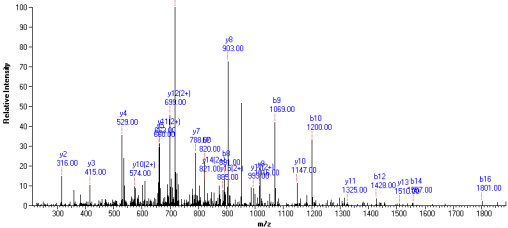

Relative Intensity

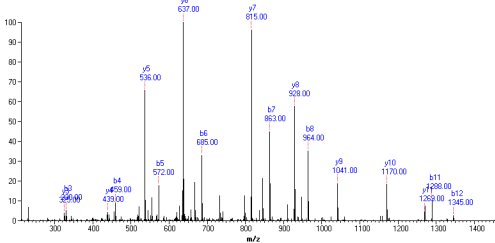

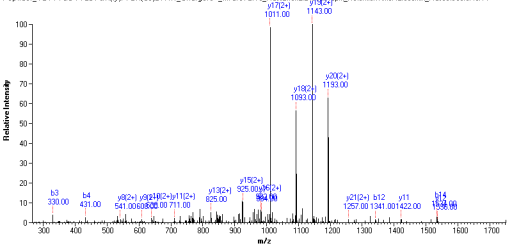

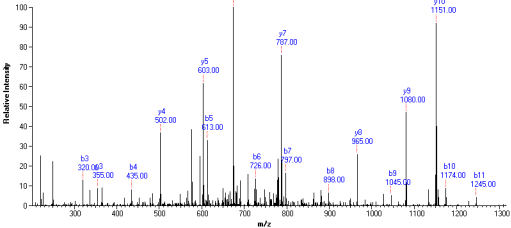

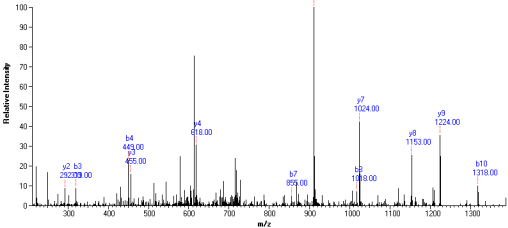



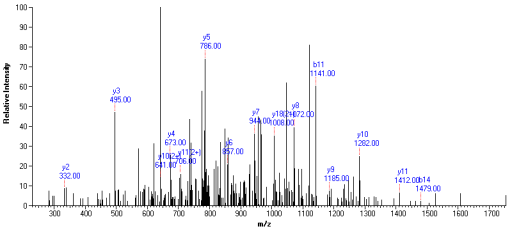

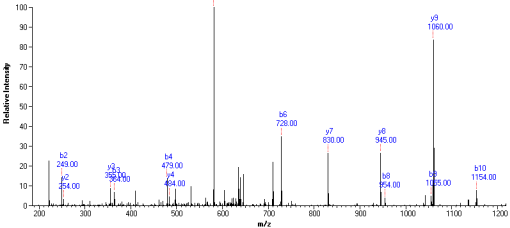

Peptide: \_TFEAIQYYLLK(ac)ASNELAK(Iy)\_Charge:3+\_m/z:720.73\_MassError:2.9875507ppm\_RetentionTime:51.715min\_MascotScore:35.86

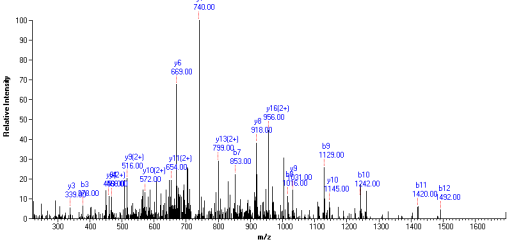

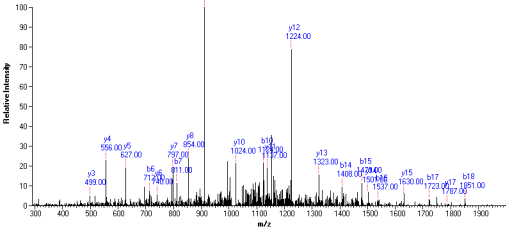

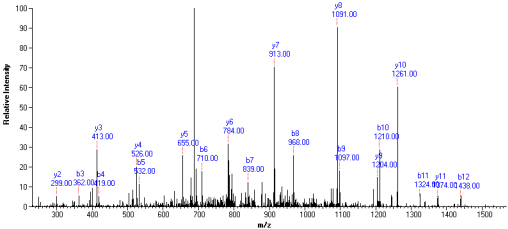

Peptide: \_TFK(ac)PER\_Charge: 2+\_m/z: 419.23\_MassError: 1.8243698ppm\_RetentionTime: 8.2057min\_MaxcotScore: 23.44

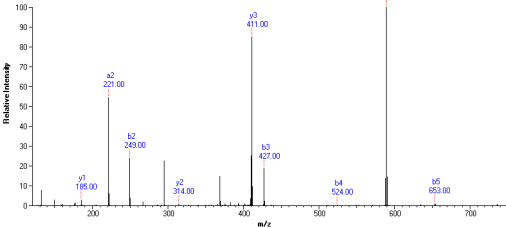

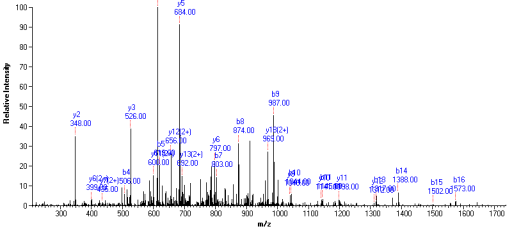

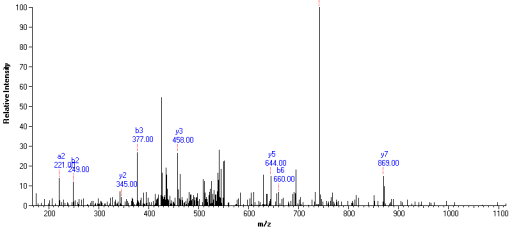



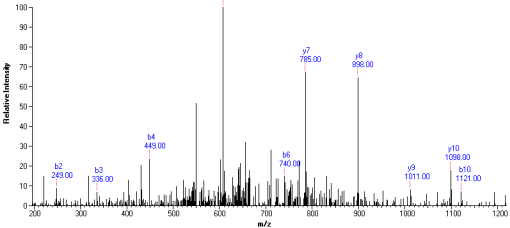

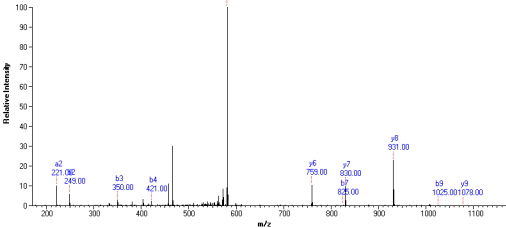

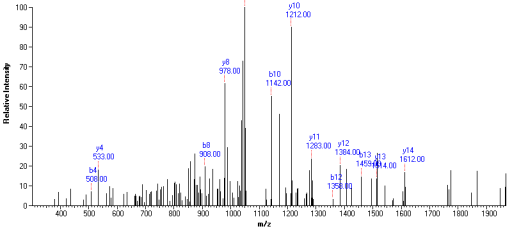

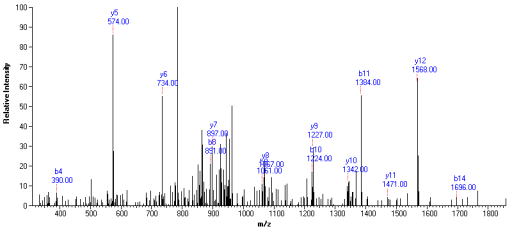

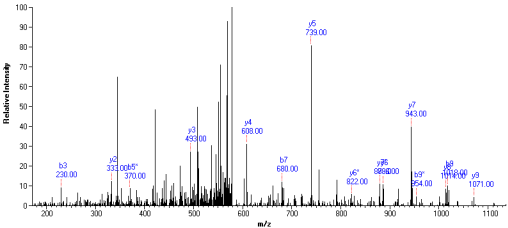

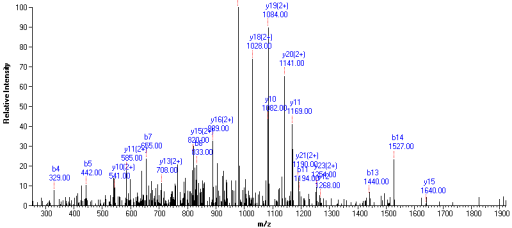

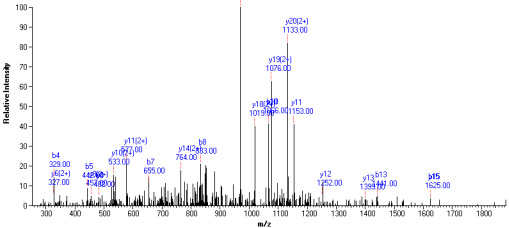

Peptide: \_TGDIVEYLVK(ac)QIK(Iy)\_Charge: 2+\_m/z: 782.45\_MassError: 1.6566729ppm\_RetentionTime: 43.043min\_MascotScore: 64.27

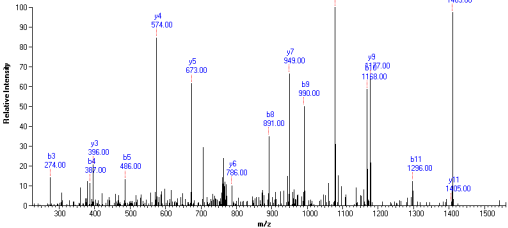



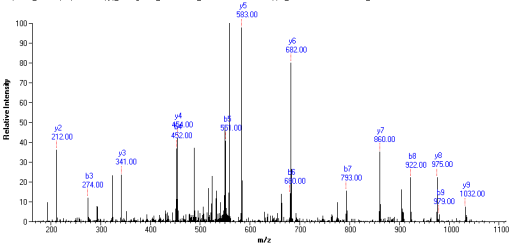

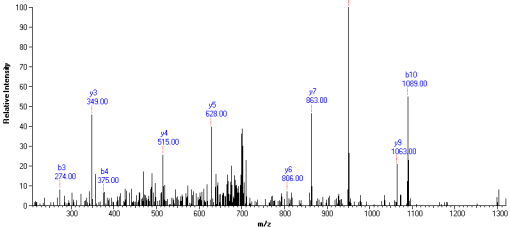

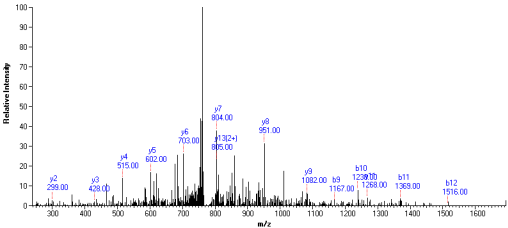

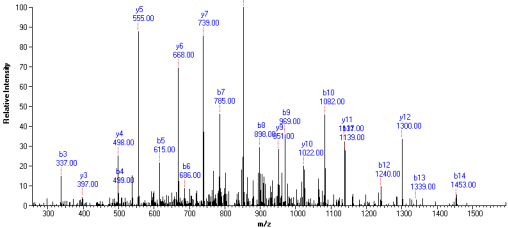

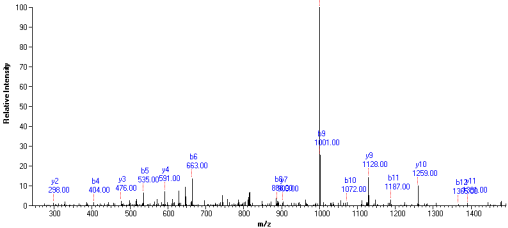

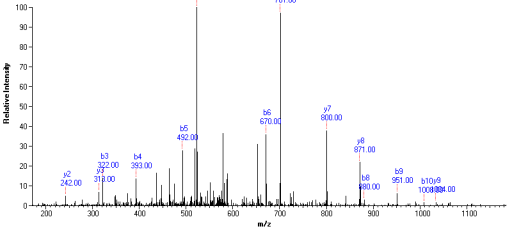

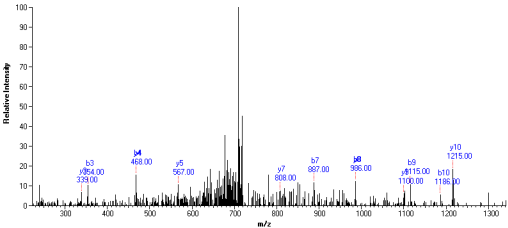

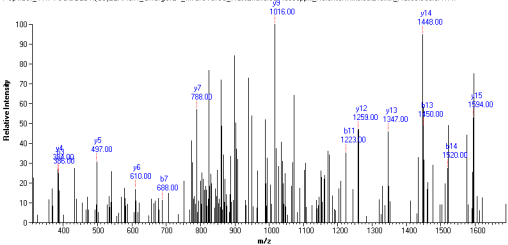



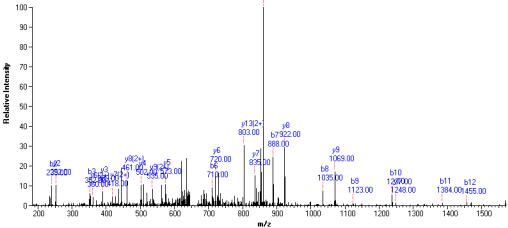

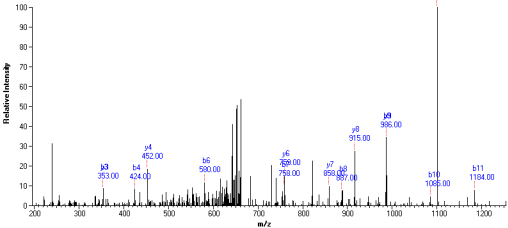

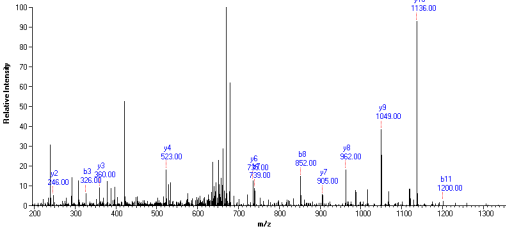

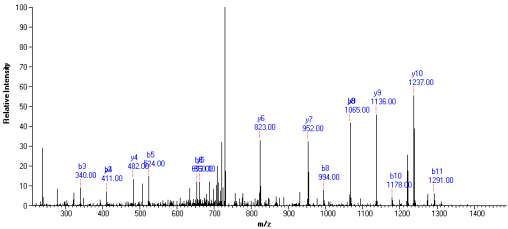

Peptide: \_TIDK(ac)LAELQER\_Charge: 2+\_m/z: 688.38\_MassError: 0.35235259ppm\_RetentionTime: 29.963min\_MascotScore: 53.24

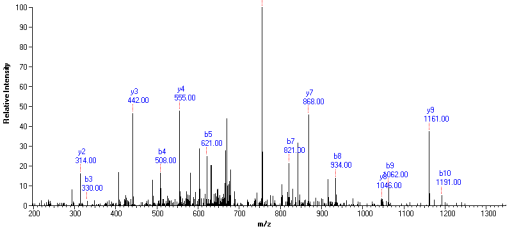

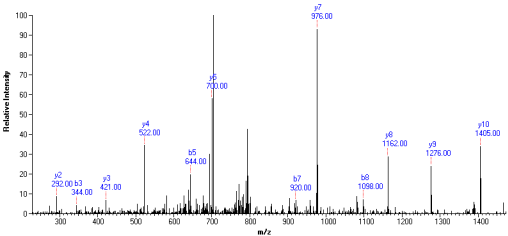

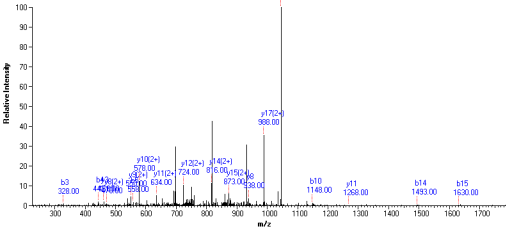

Peptide: \_TINK(ac)YLGSDYVVK[ly]\_ Charge: 2+\_ m/z: 779.43\_MassError: 1.2457195ppm\_RetentionTime: 24.557min\_MascotScore: 45.88

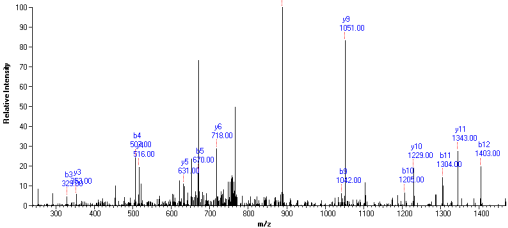



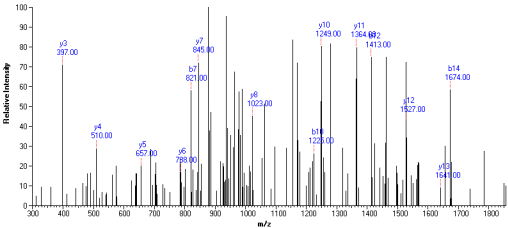

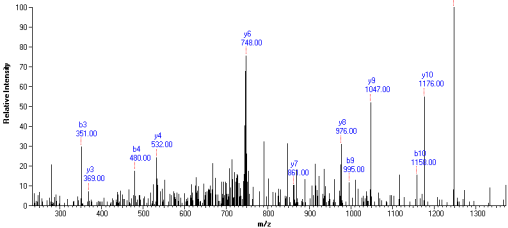

Peptide: \_TK(ac)AEFVR\_Charge: 2+\_m/z: 455.76\_MassError: 0.83797795ppm\_RetentionTime: 14.588min\_MascotScore: 38.57

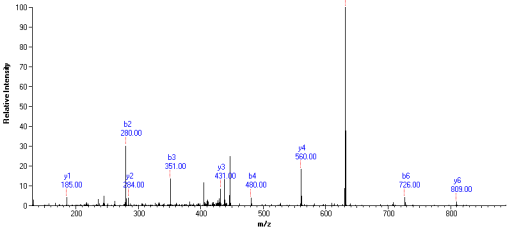

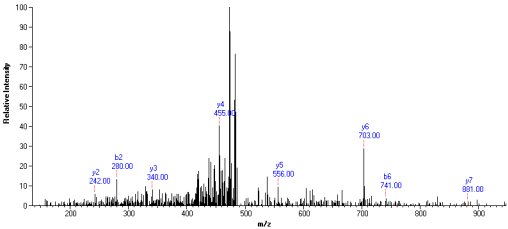

Peptide: \_TK[ac]GIDGLTAQLK[ly]\_ Charge: 2+ \_m/z: 651.88\_MassError: 0.21715133ppm\_RetentionTime: 29.594min\_MascotScore: 23.31

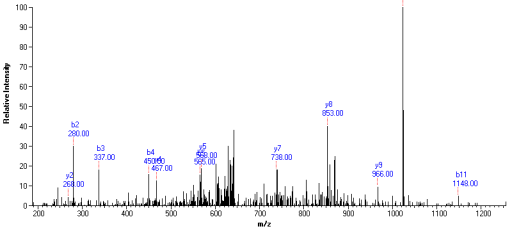

Peptide: \_TK[ac]LLAQK[ly]\_ Charge: 2+ m/z: 430.28 MassError: 0.81021516ppm RetentionTime: 8.9484min MascotScore: 43.64

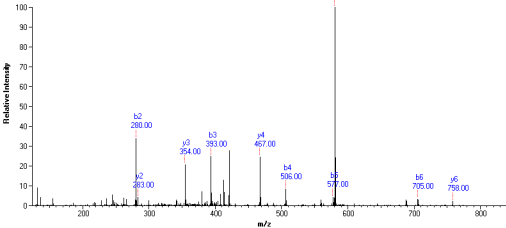

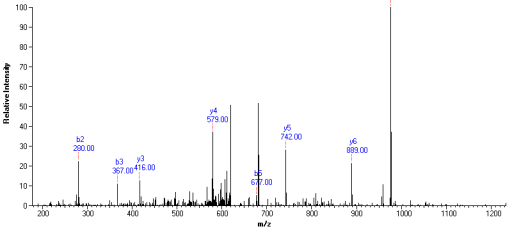

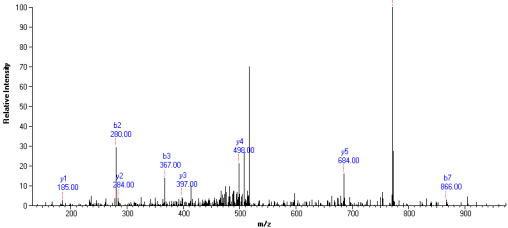



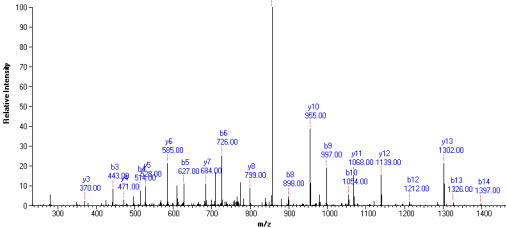

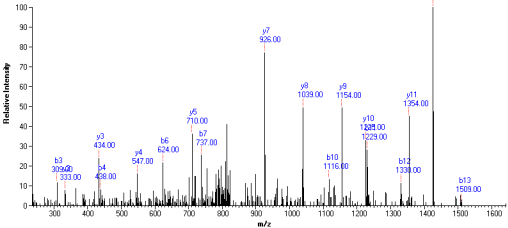

Peptide: \_TK(IY)PEK(ac)LELK(IY)\_Charge: 2+\_m/z: 576.36\_MassError: 0.58646525ppm\_RetentionTime: 15.155min\_MascotScore: 44.04

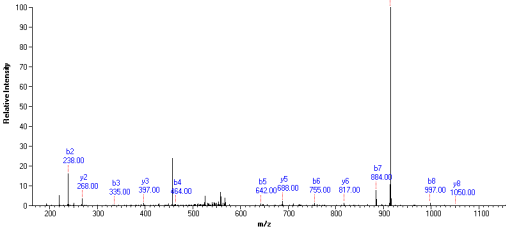

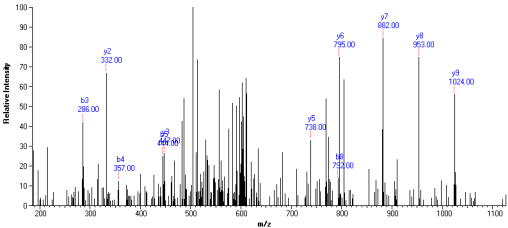

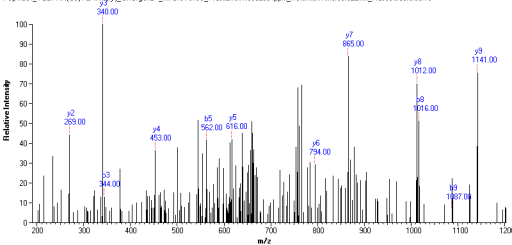

Peptide: \_TLEFLGHK[ac]VIR\_Charge: 2+\_m/z: 686.91\_MassError: -0.066770115ppm\_RetentionTime: 30.92min\_MascotScore: 54.13

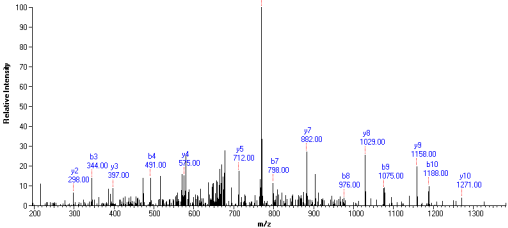

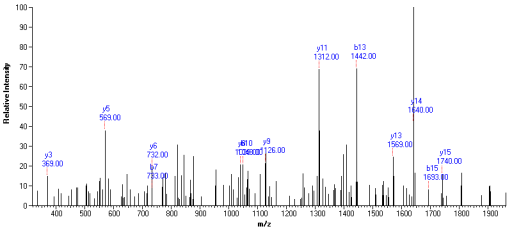

Peptide: TLHLADEK(jac)LIR\_Charge: 3+\_m/z: 456.94\_MassError: 0.8732978ppm\_RetentionTime: 26.718min\_MascotScore: 30.48

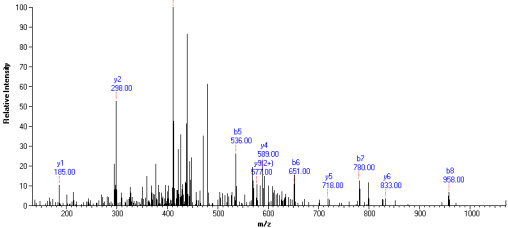



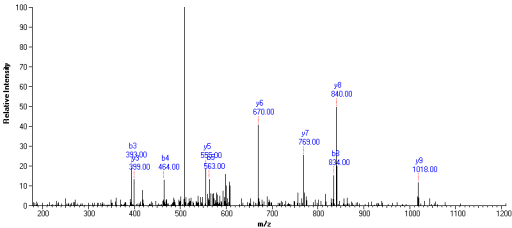

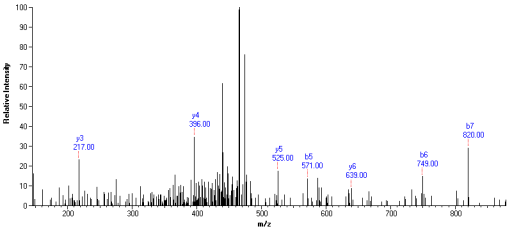

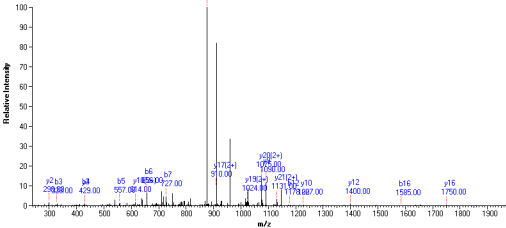

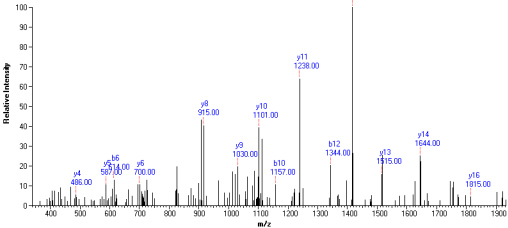

Peptide: TLNLFNIK(ac)K(Iy)\_Charge: 2+\_m/z: 574.85\_MassError: -0.6498541ppm\_RetentionTime: 31.496min\_MascotScore: 34.31

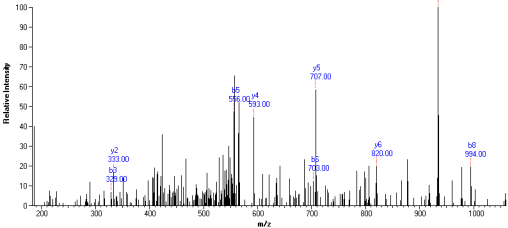

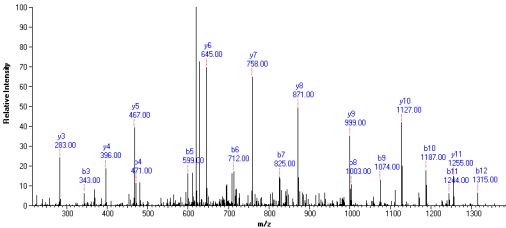

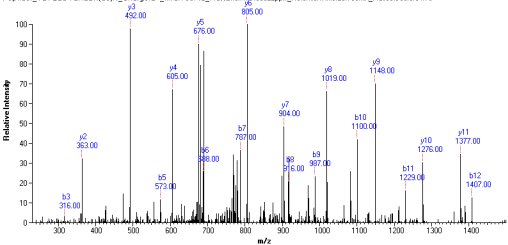

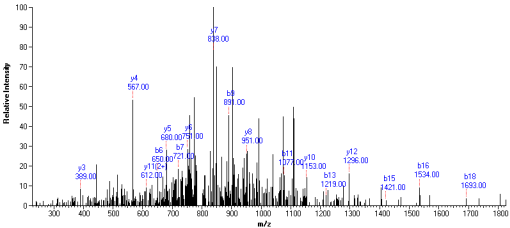



Peptide: \_TM(ox)LYAINGGYDEK(ac)LK(Iy)\_Charge:2+\_m/z: 863.46\_MassError:0.50789986ppm\_RetentionTime:30.793min\_MascotScore:94.01

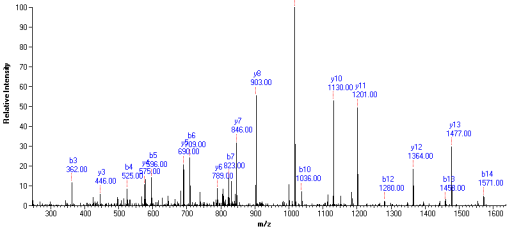

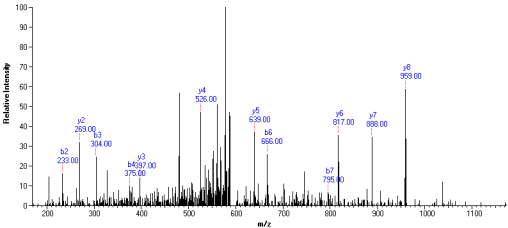

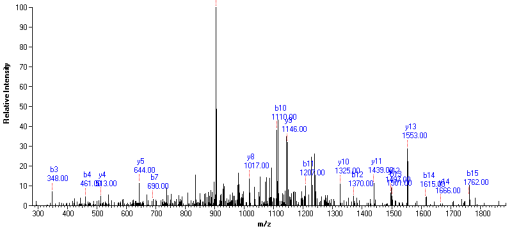

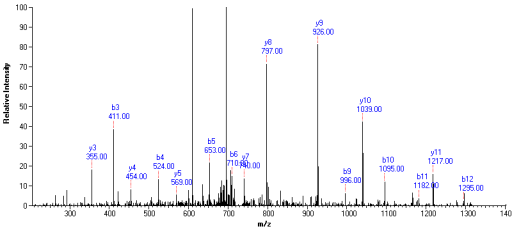

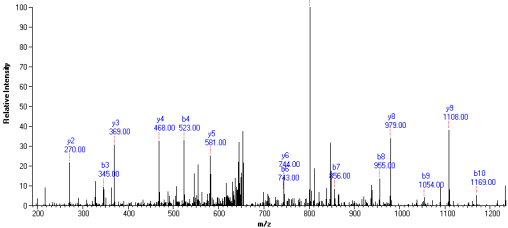

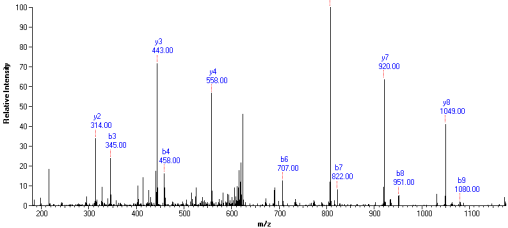

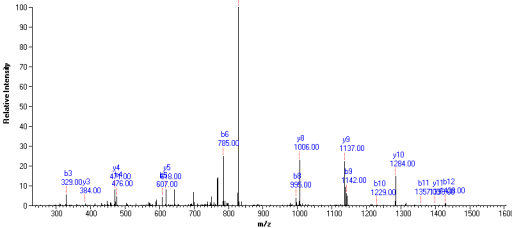

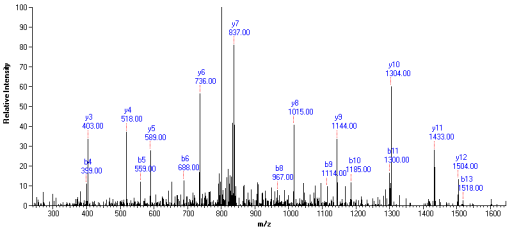



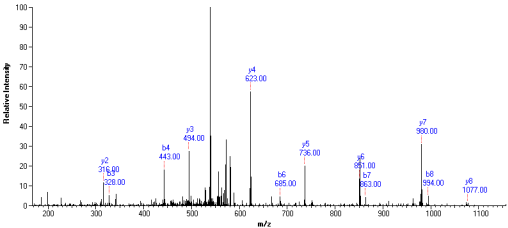

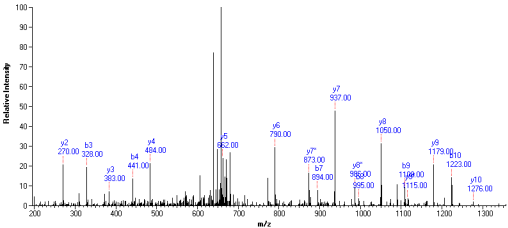

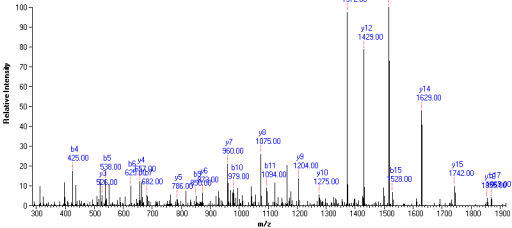

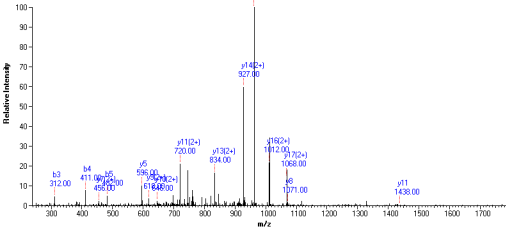

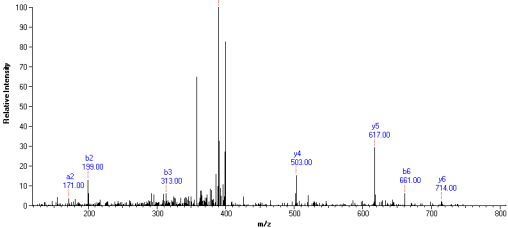

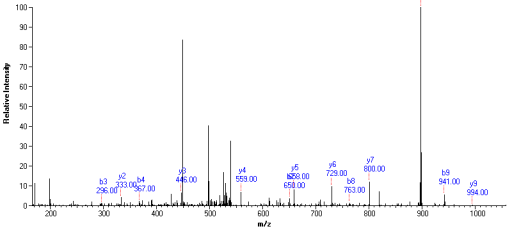

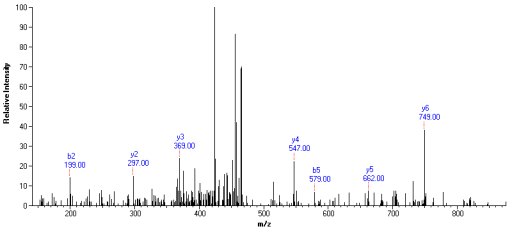

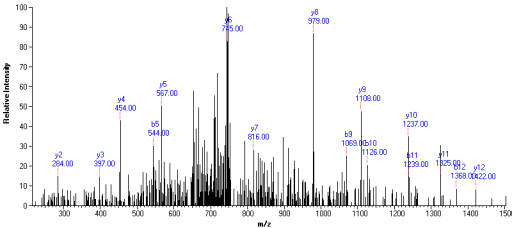



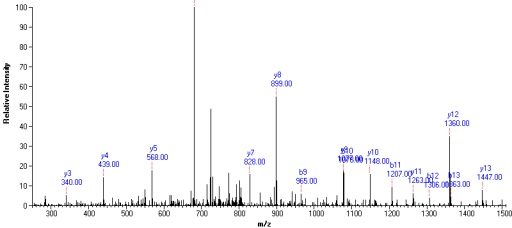

Peptide: \_TQANLSETLFK(ac)PR\_Charge: 2+\_m/z: 782.93\_MassError: -0.20948147ppm\_RetentionTime: 31.409min\_MascotScore: 59.58

Relative Intensity

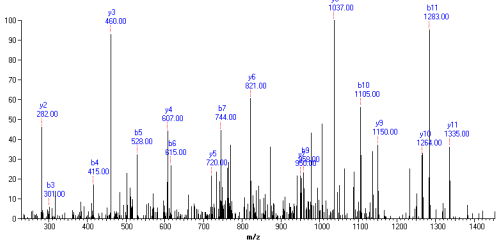

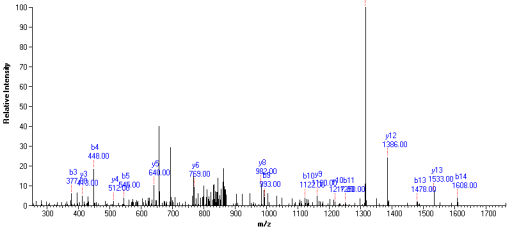

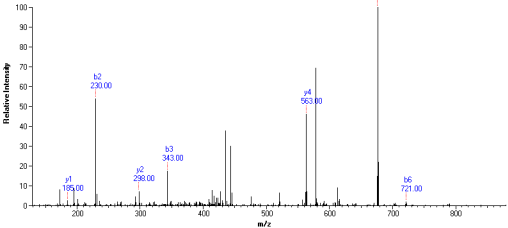

Peptide: \_TQLIDYIAEK(ac)AELSK(y) Charge: 2+ m/z: 858.5 MassError: 4.2463233ppm RetentionTime: 46.819min MascotScore: 79.51

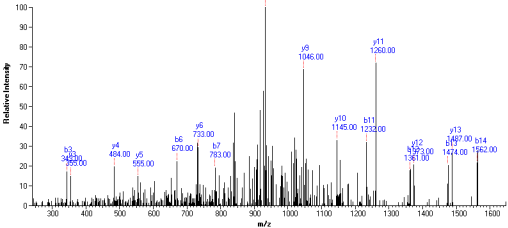

Peptide: \_TQLK(ac)AYLEK(Iy)\_ Charge: 2+\_ m/z: 576.34\_MassError:0.67263884ppm\_RetentionTime:25.109min\_MascotScore:41.78

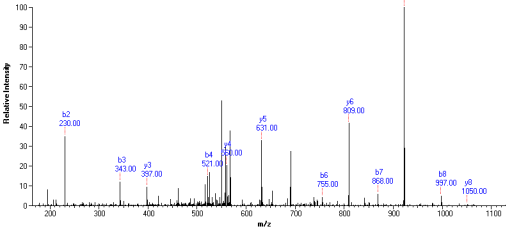

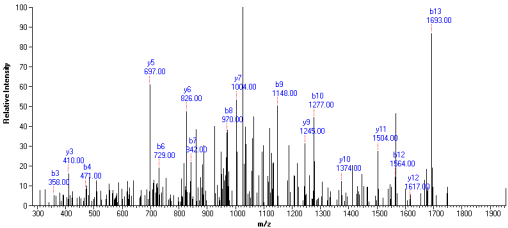

Peptide: \_TQQITLIK(ac)DK(Iy)\_Charge: 2+\_m/z: 623.37\_MassError: 0.11761649ppm\_RetentionTime: 18.41min\_MascotScore: 48.04

Relative Intensity

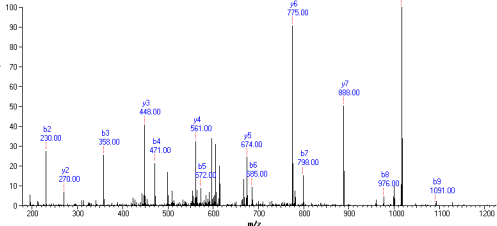



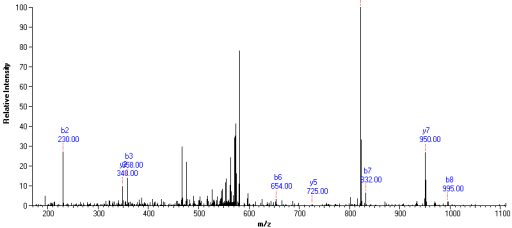

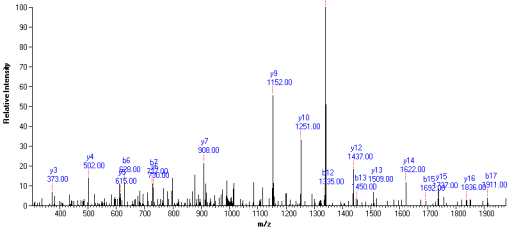

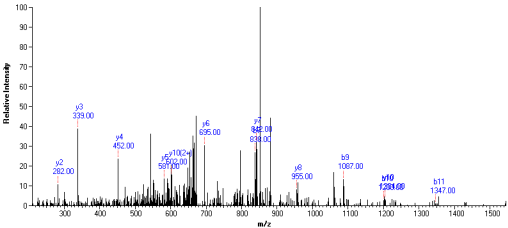

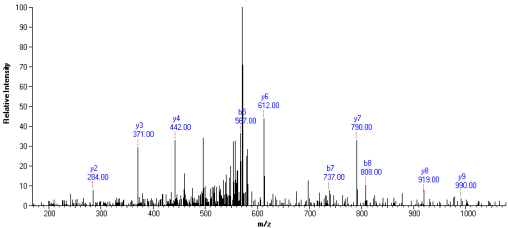

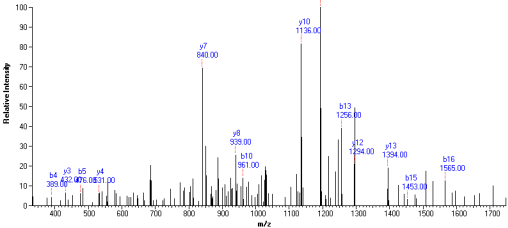

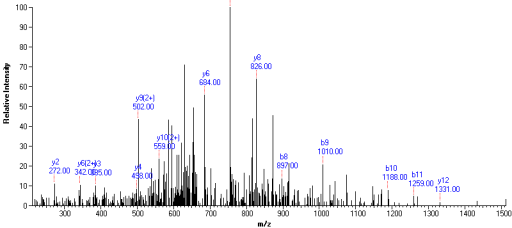

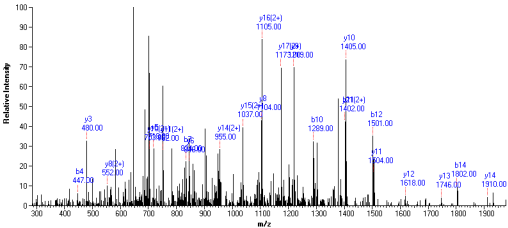

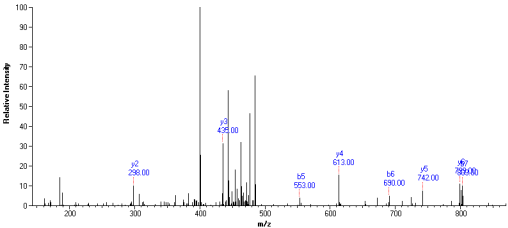



Peptide: \_TSGK(ac)FAEQK(ly)\_Charge: 2+\_m/z:527.28\_MassError:0.6882597ppm\_RetentionTime:7.5987min\_MascotScore:421

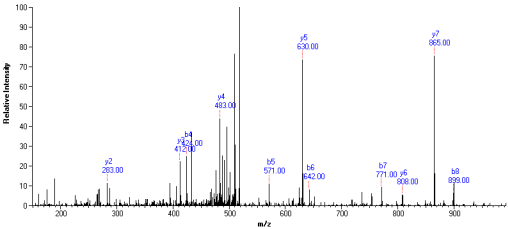

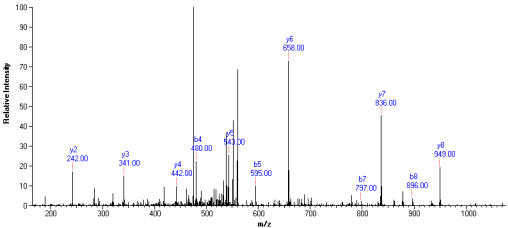

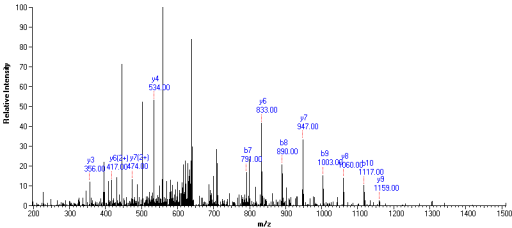

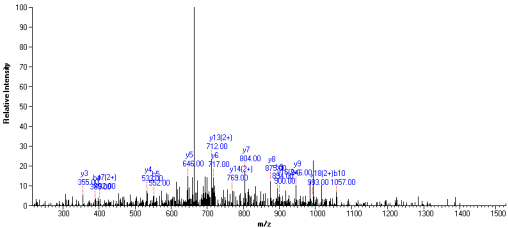

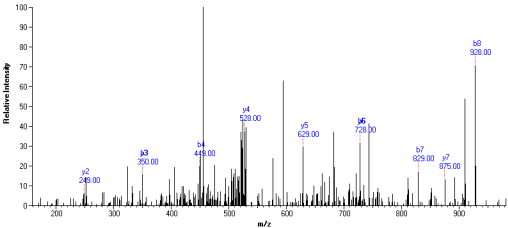

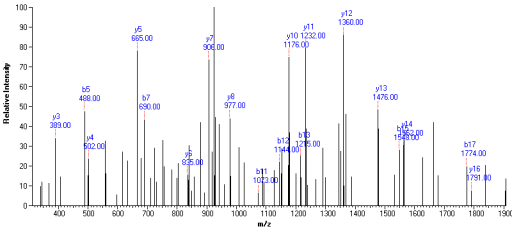

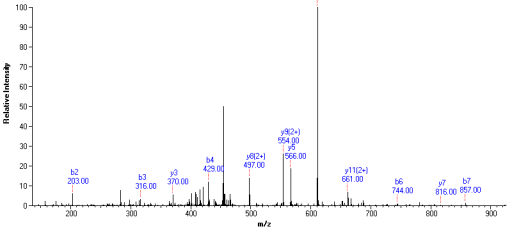

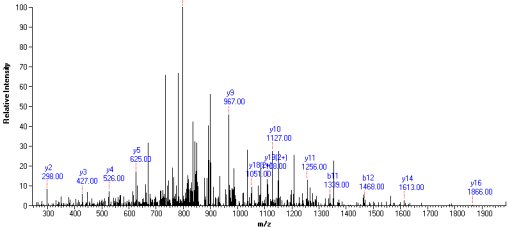



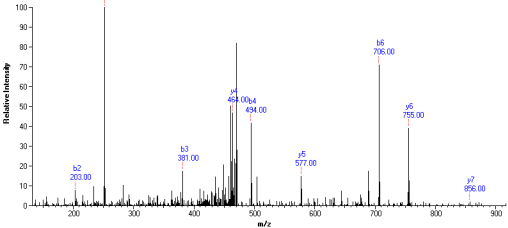

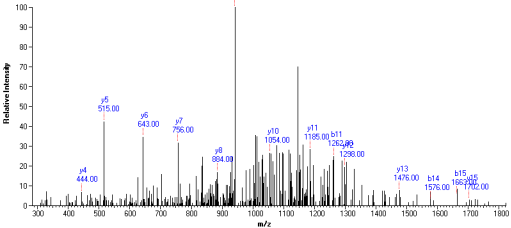

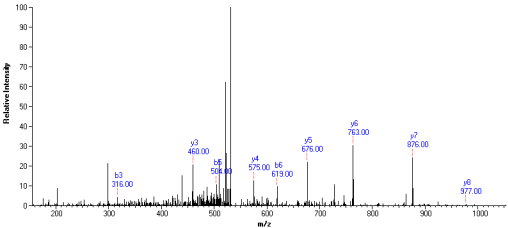

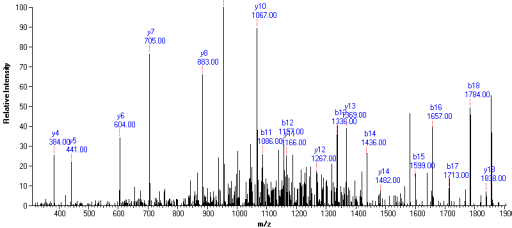

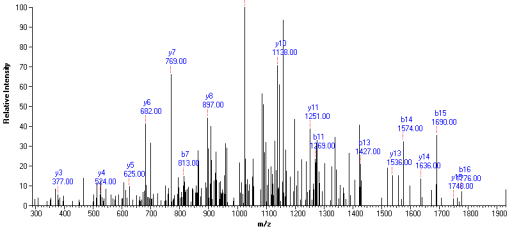

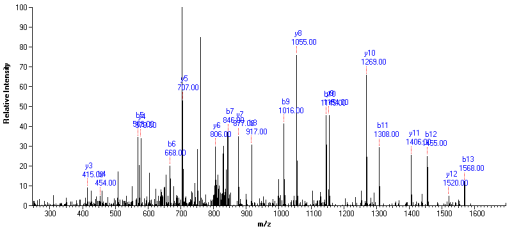

Peptide: \_TTQK(ac)YINELQANPAK(y) Charge: 2+ m/z: 888.98 MassError: 1.4558253ppm RetentionTime: 25.652min MascotScore: 61.81

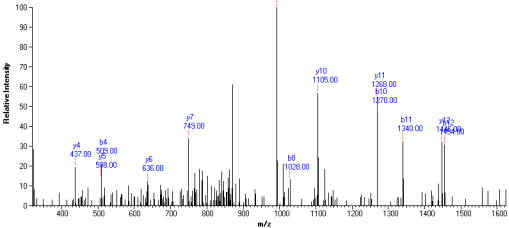

Peptide: \_TTYVIK(ac)ELNDK(Iy)\_Charge:2+\_m/z:691.38\_MassError:1.5226584ppm\_RetentionTime:26.858min\_MaxcotScore:45.17

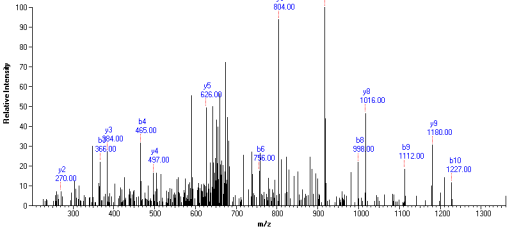



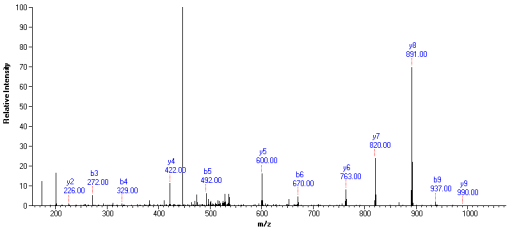

Relative Intensity

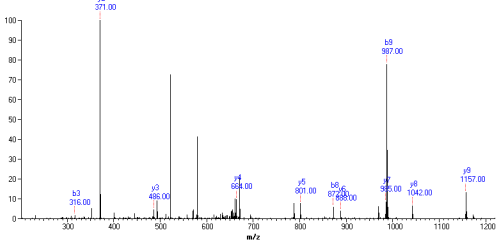

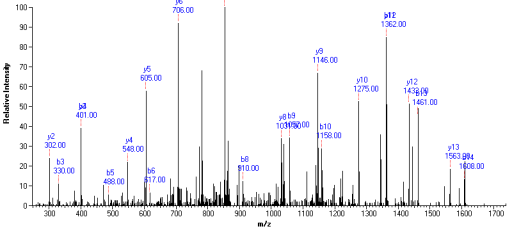

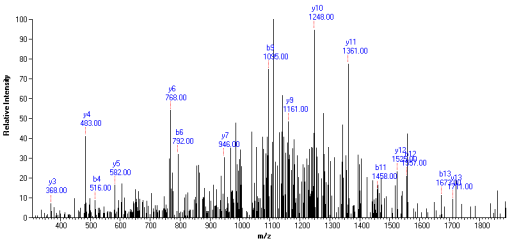

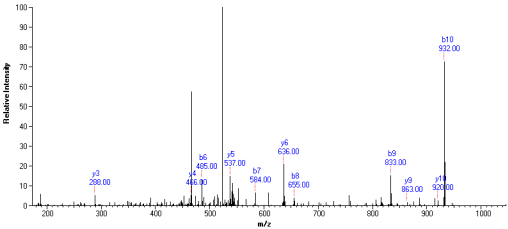

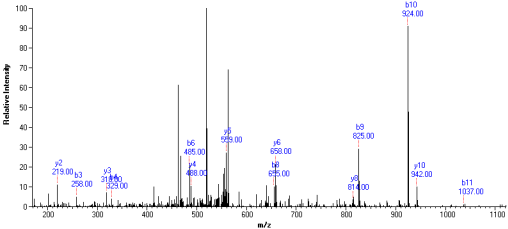

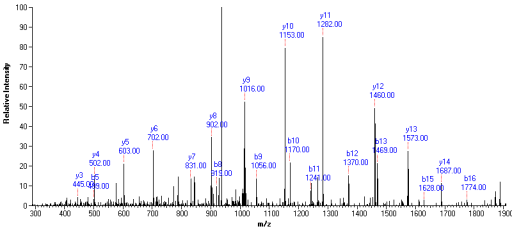

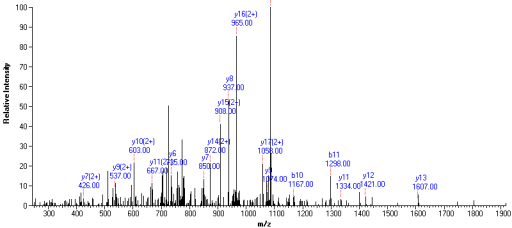



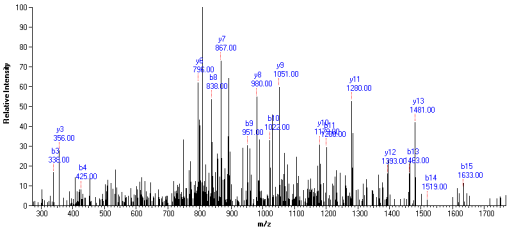

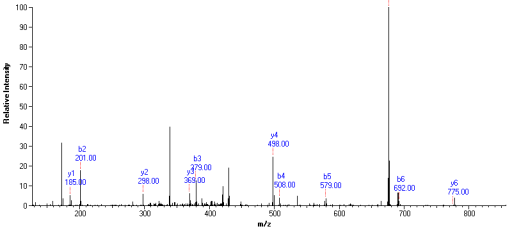

Peptide: \_TVK(ac)TLLYK[ly]\_Charge: 2+\_m/z: 480.33\_MassError: 0.70996815ppm\_RetentionTime: 19.309min\_MascotScore: 35.3

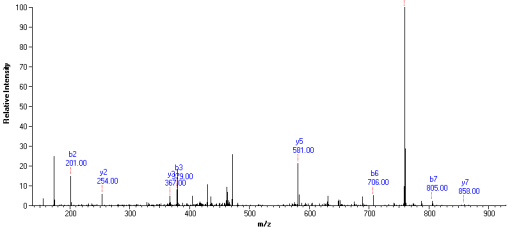

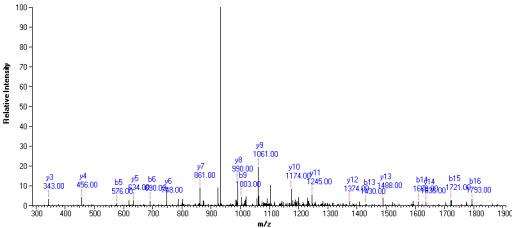

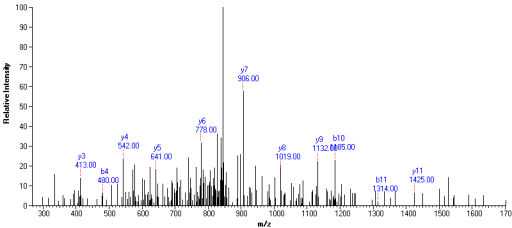

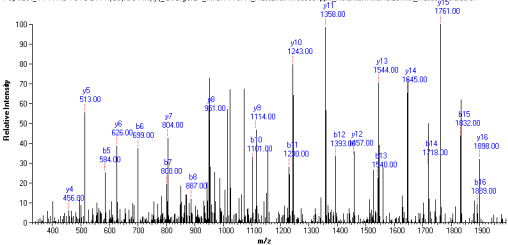

Peptide: \_TWFVEAK(ac)LK(Iy)\_Charge: 2+\_m/z: 590.34\_MassError: -0.50631712ppm\_RetentionTime: 35.569min\_MascotScore: 42.84

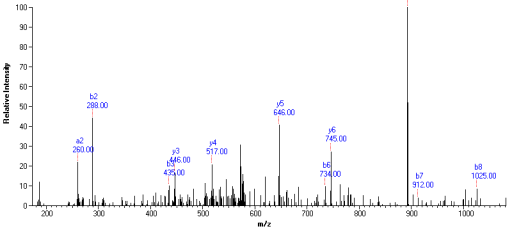

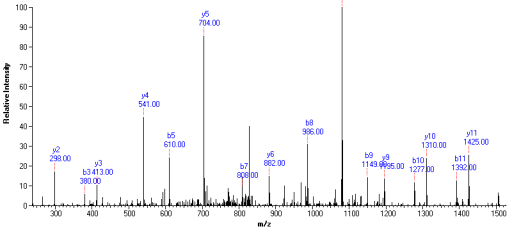



Peptide: \_TYEEK(ac)YNSHNGEELR\_Charge: 2+\_m/z: 932.95\_MassError: 2.2851092ppm\_RetentionTime: 17.083min\_MascotScore: 38.21

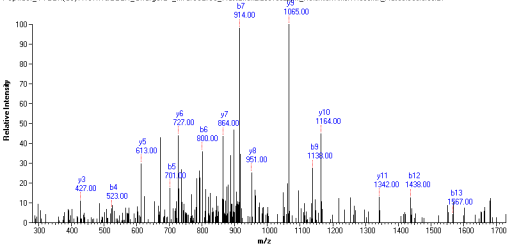

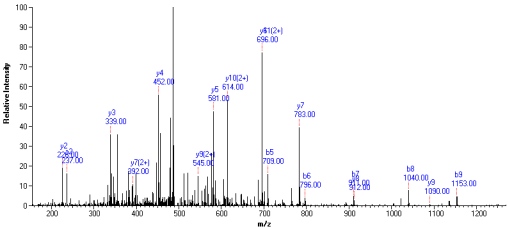

Peptide: \_TYLYQETK(ac)ALLTPGK(y) Charge: 2+ m/z: 892.5 MassError: -2261.953ppm RetentionTime: 38.386min MascotScore: 45.03

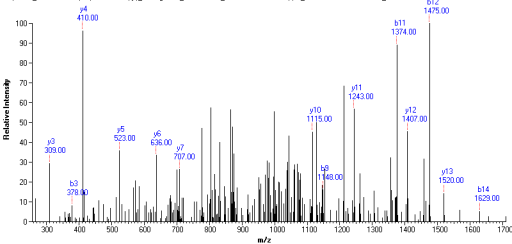

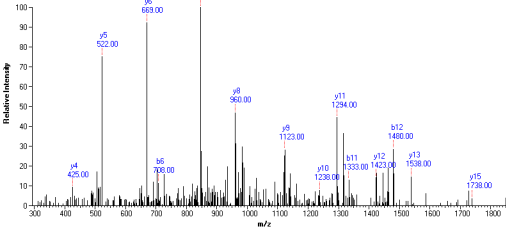

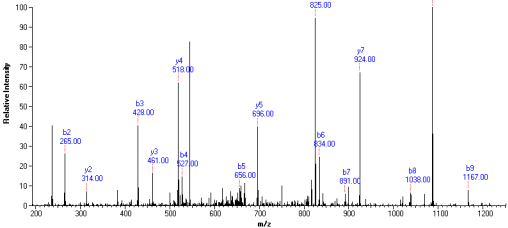

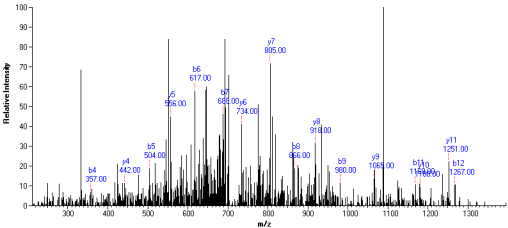

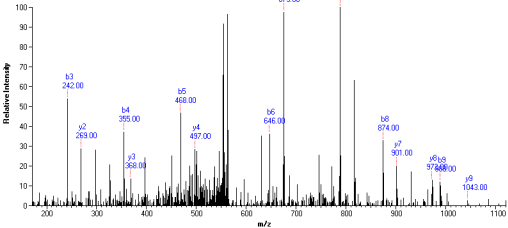

Peptide: \_VAASK(ac)VLSGPQAQPAGDK(Iy)\_Charge: 2+\_m/z: 891.49\_MassError: 1.1433997ppm\_RetentionTime: 19.679min\_MascotScore: 78.72

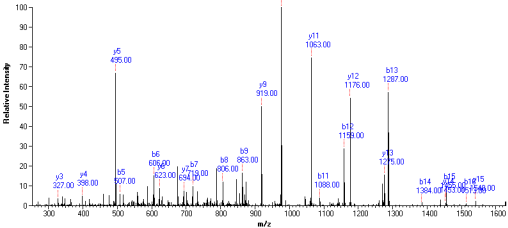



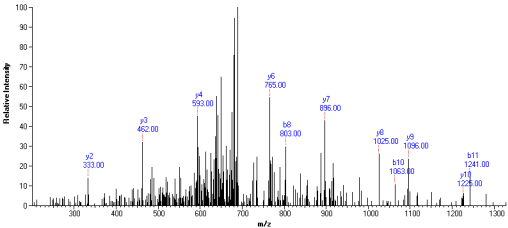

Peptide: \_VAEFFGK(ac)EPR\_Charge:2+\_m/z: 620.33\_MassError:0.16633571gm\_RetentionTime:22.099min\_MascotScore:55.13

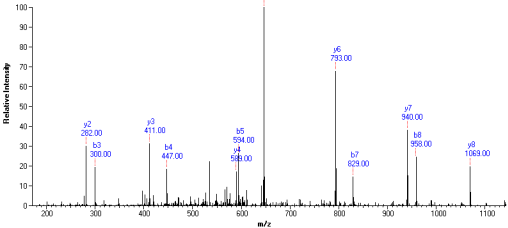

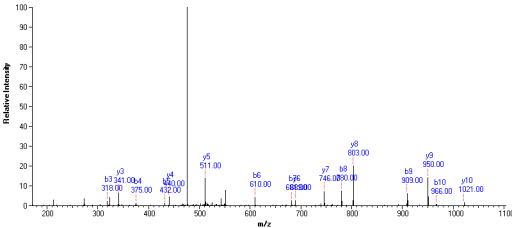

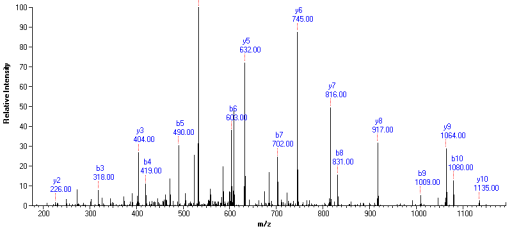

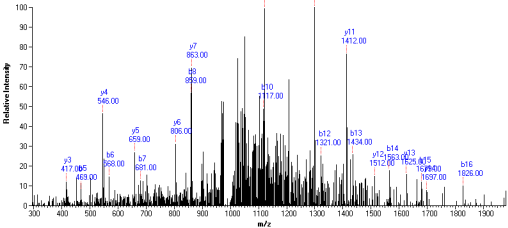

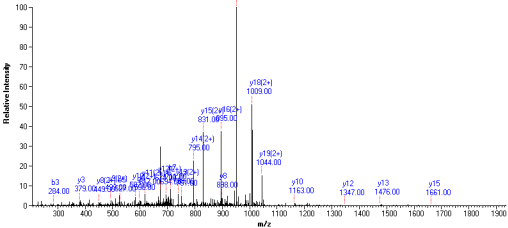

Peptide: \_VAK(ac)FVK\_Charge: 2+\_m/z: 367.23\_MassError: 2.5063829ppm\_RetentionTime: 12.504min\_MaxcortScore: 28.7

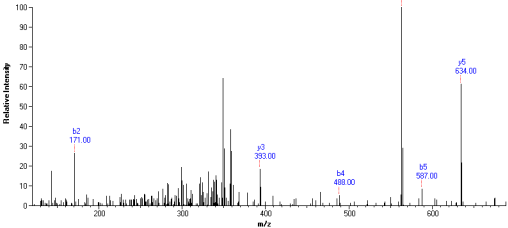

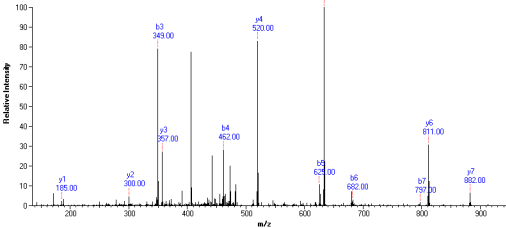



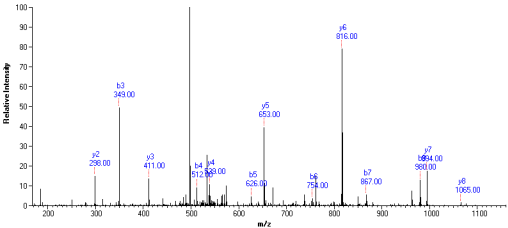

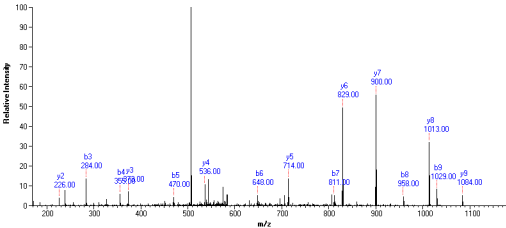

Peptide: \_VALELVK(ac)EGR\_Charge:2+\_m/z: 587.35\_MassError:-0.29348146ppm\_RetentionTime:21.618min\_MascotScore:61.62

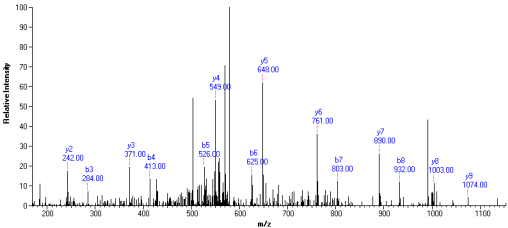

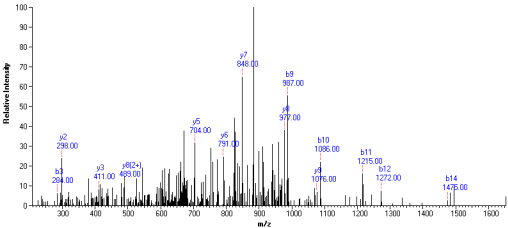

Relative Intensity

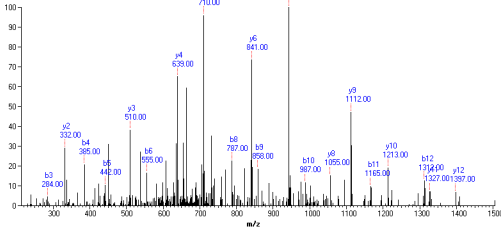

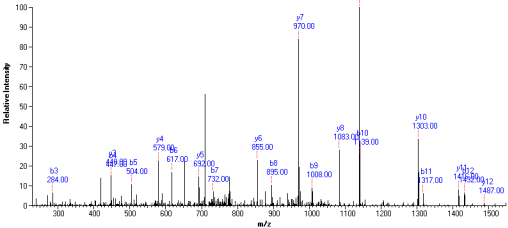

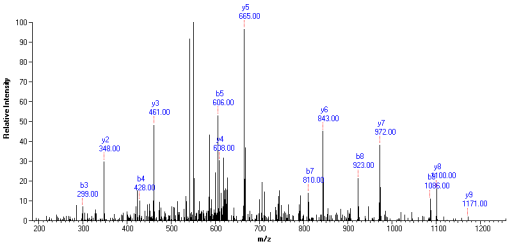

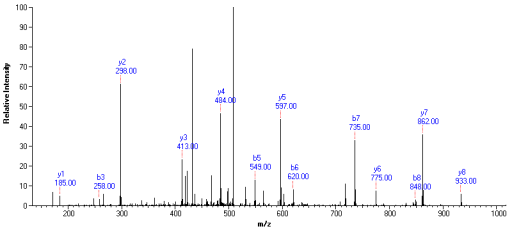



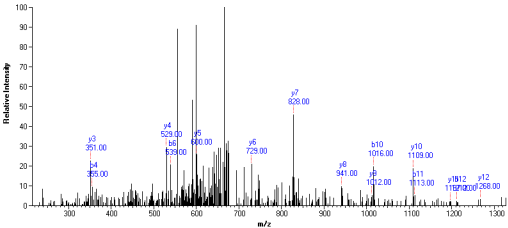

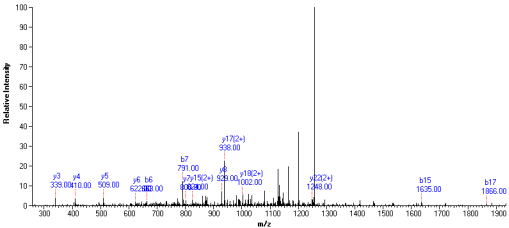

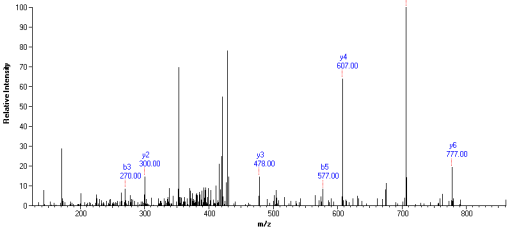

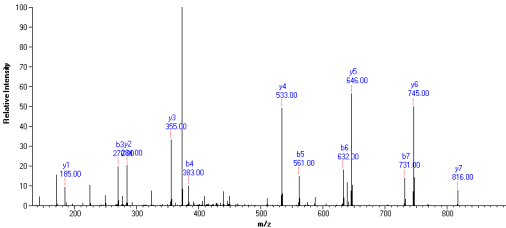

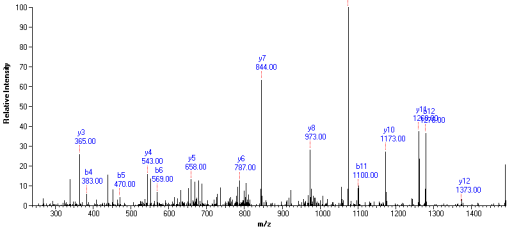

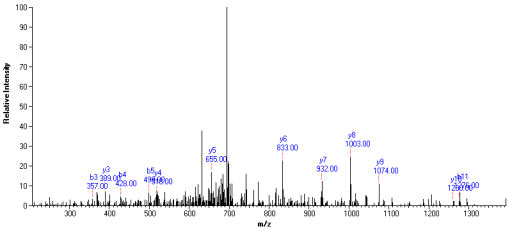

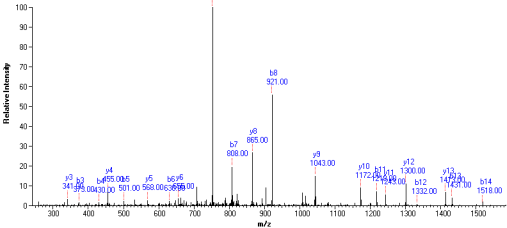

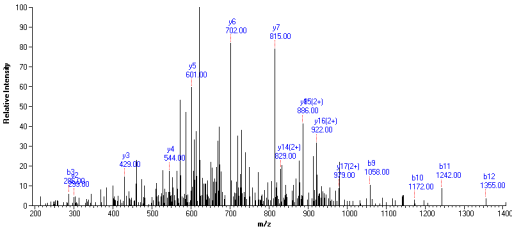



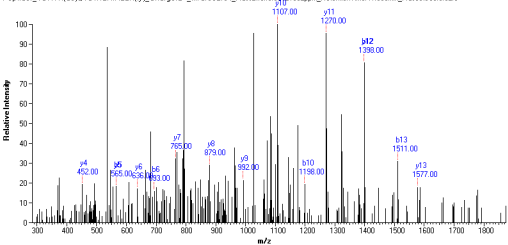

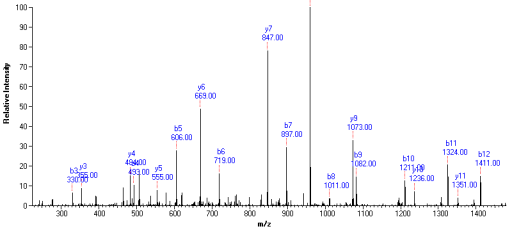

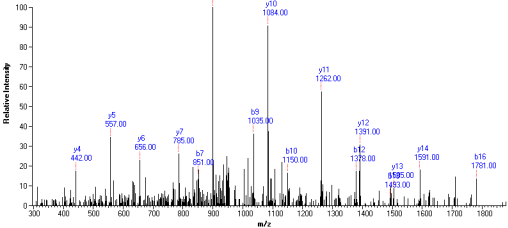

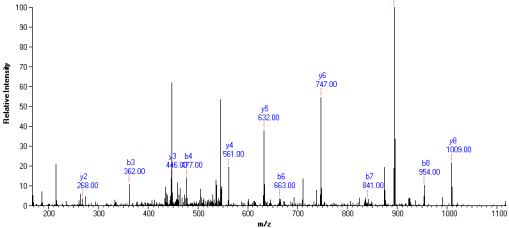

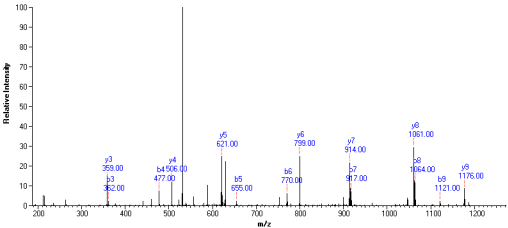

Peptide: \_VDFSK(ac)FGEIEEVELGR\_Charge:2+\_m/z:948.98\_MassError:2.7380599ppm\_RetentionTime:40.813min\_MascotScore:68.16

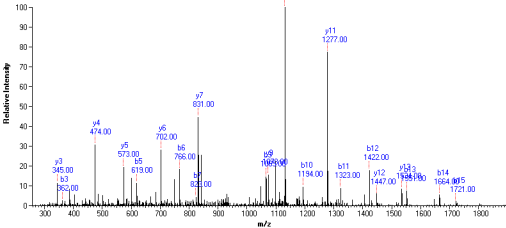

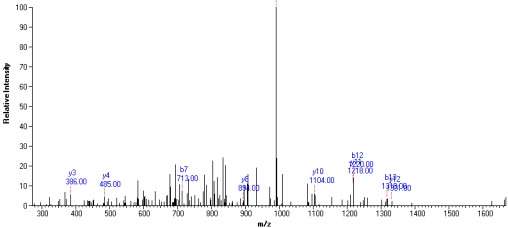

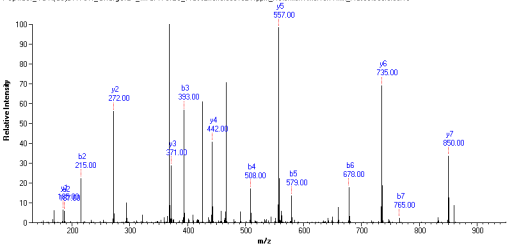



Peptide: \_VDK(ac)QLR\_Charge: 2+\_m/z: 409.75\_MassError: 2.4182659ppm\_RetentionTime: 10.384min\_MascotScore: 44.63

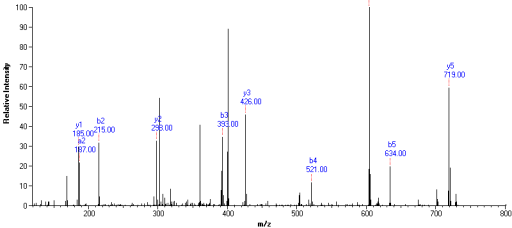

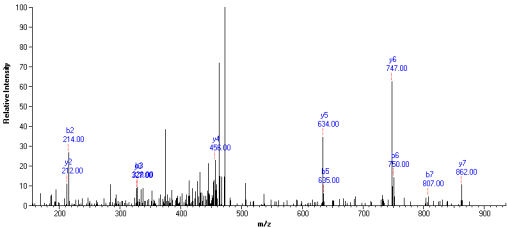

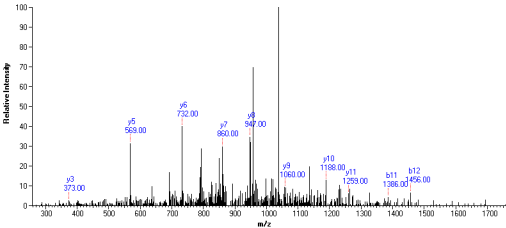

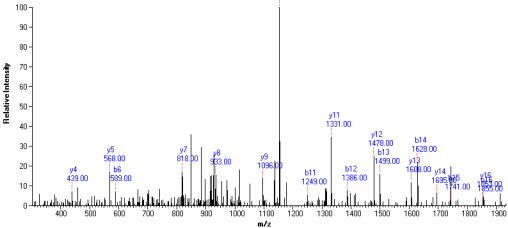

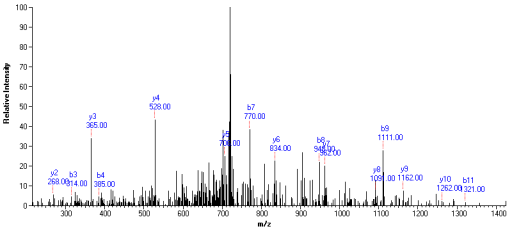

Peptide: \_VDVLK(ac)SLVNTYQEILK(y)\_Charge:2+\_m/z:960.56\_MassErr:3.7617553ppm\_RetentionTime:51.944min\_MascotScore:51.47

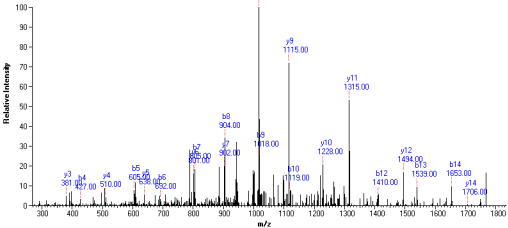

Peptide: \_VEDVLFAMVK(ac)EVENR\_Charge: 3+\_m/z: 613.32\_MassError: 0.71703166ppm\_RetentionTime: 51.046min\_MascotScore: 46.85

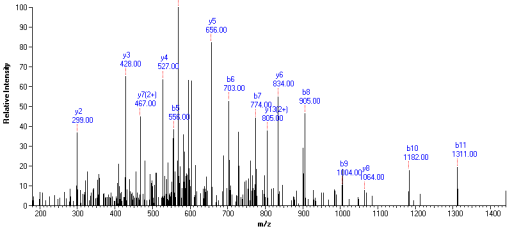

Peptide: \_VEGDTK(ac)PELELTLK(I) Charge: 2+ m/z: 815.45\_MassError: 1.2773425 ppm\_RetentionTime: 33.683min\_MascotScore: 45.75

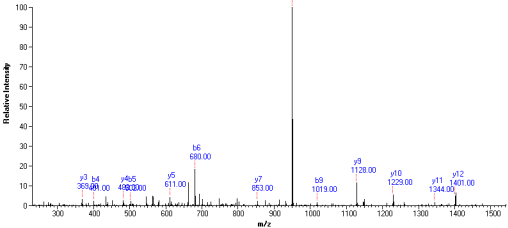



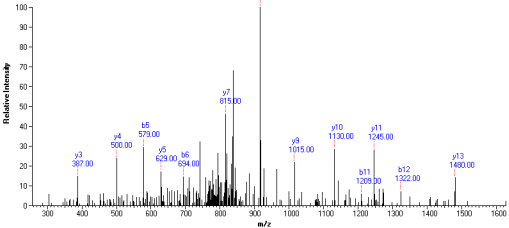

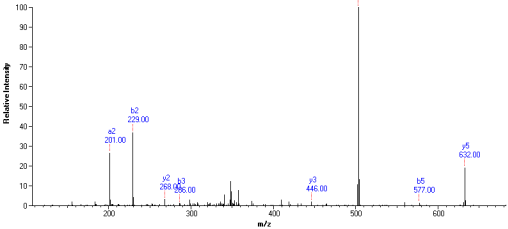

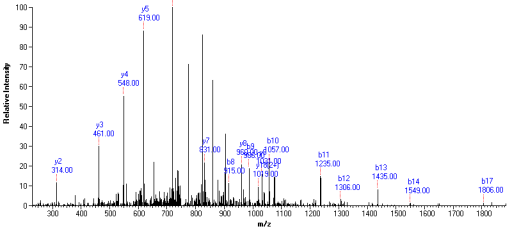

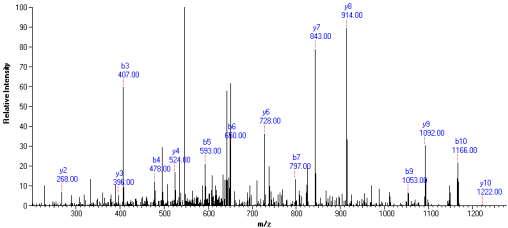

Peptide: \_VEK(ac)AVESGDK(ly)\_Charge: 2+\_m/z: 560.3\_MassError: 1.0999375ppm\_RetentionTime: 7.0253min\_MassotScore: 54.96

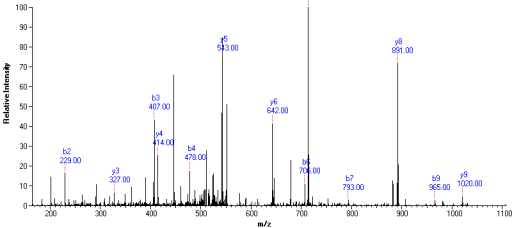

Peptide: \_VEK(ac)IAALMDK(Iy)\_Charge: 2+\_m/z: 588.34\_MassError: 1.1945225ppm\_RetentionTime: 27.631min\_MascotScore: 40.36

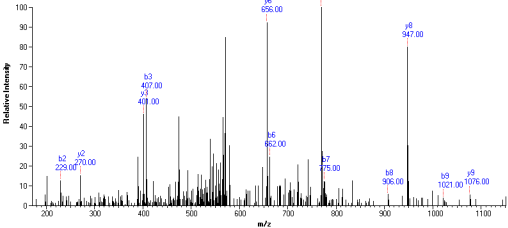

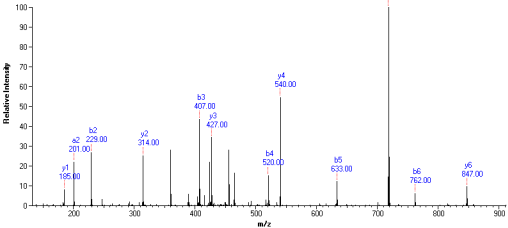

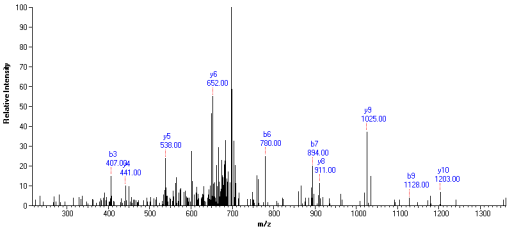



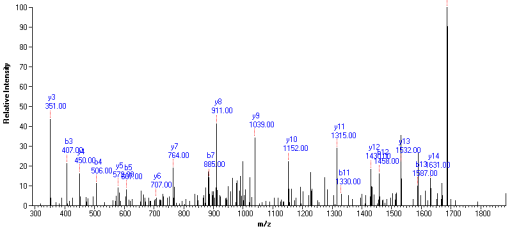

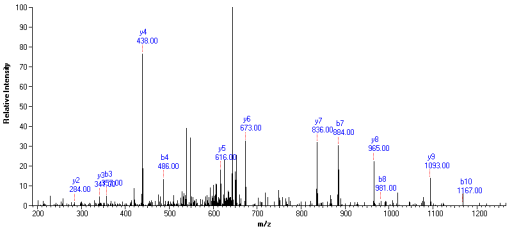

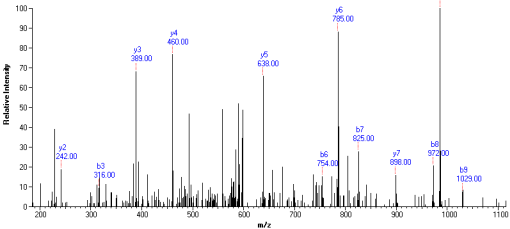

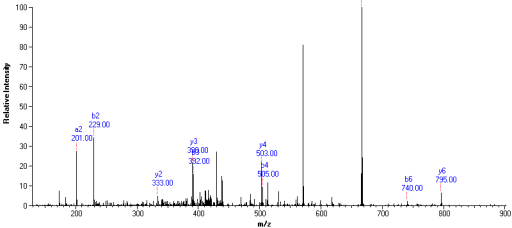

Peptide: \_VFGQVDDAK(ac)LR\_Charge: 2+\_m/z: 654.36\_MassError: 1.399341ppm\_RetentionTime: 24.167min\_MascotScore: 42.12

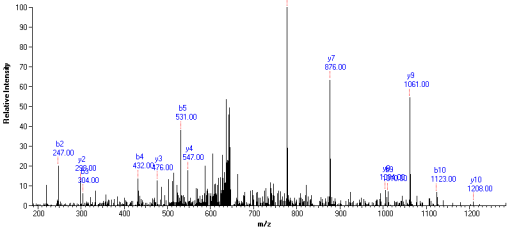

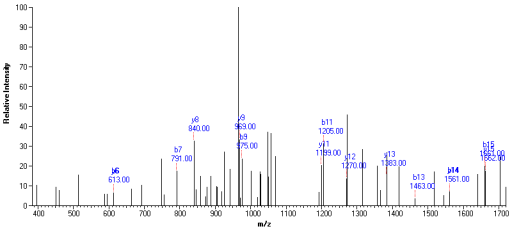

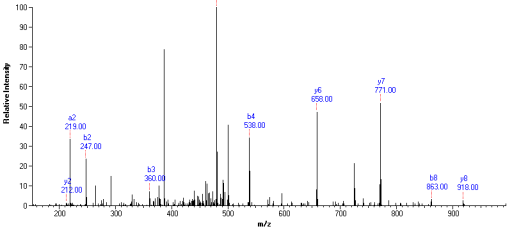

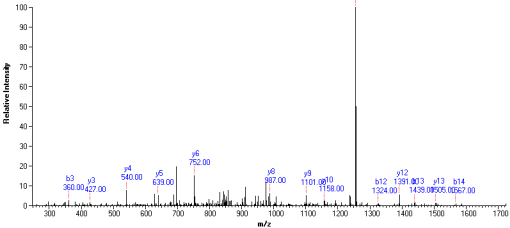



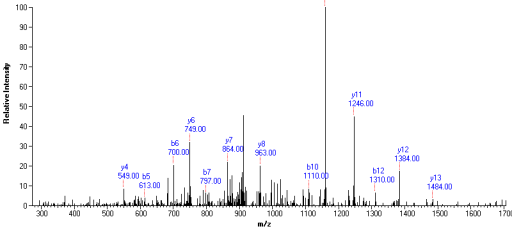

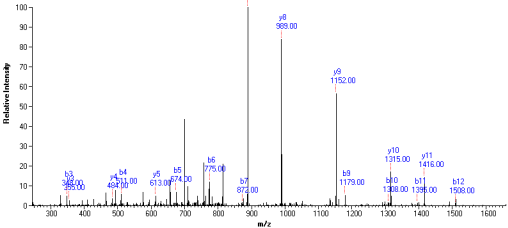

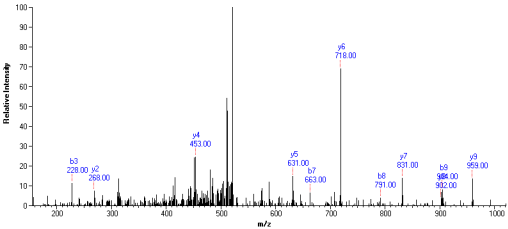

Peptide: \_VGDIVIFNDGYGYK(ac)SEK(Iy)\_Charge: 2+\_m/z: 949.49\_MassError: -6.2968531ppm\_RetentionTime: 34.724min\_MascotScore: 44.73

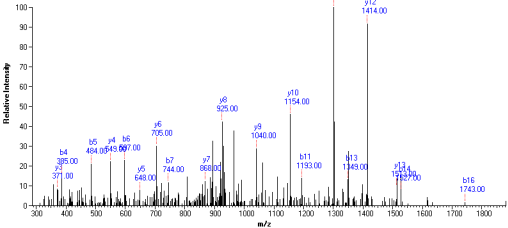

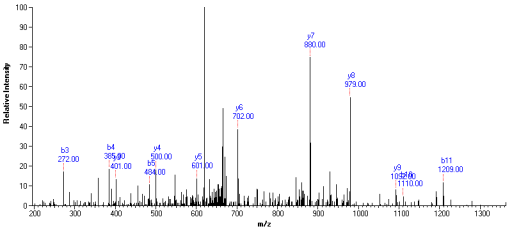

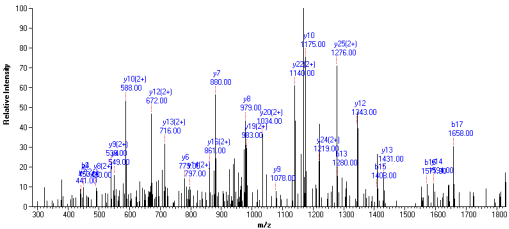

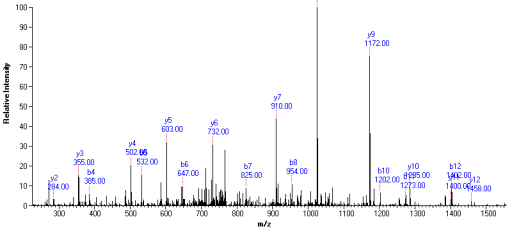

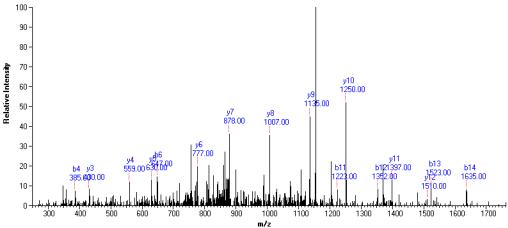



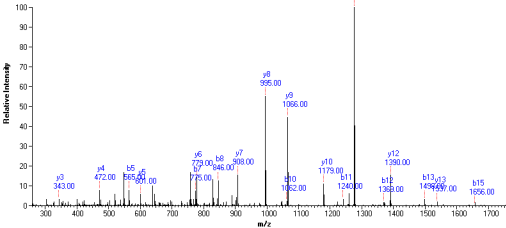

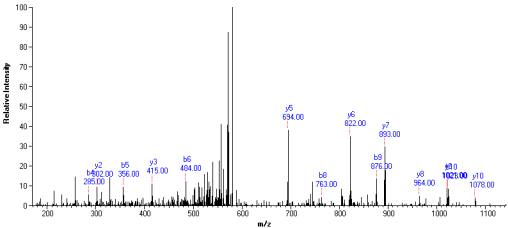

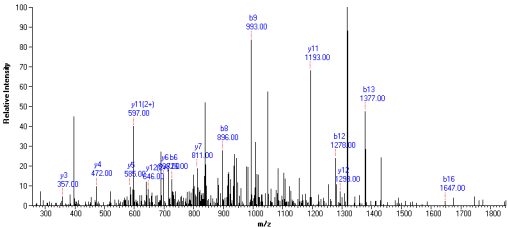

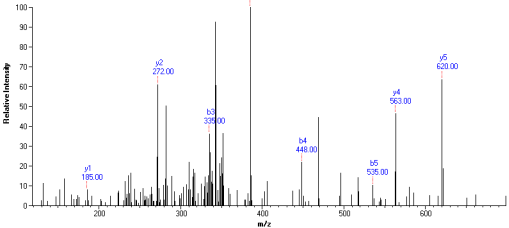

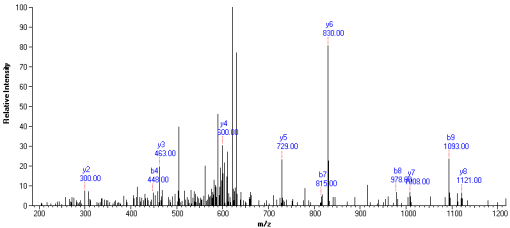

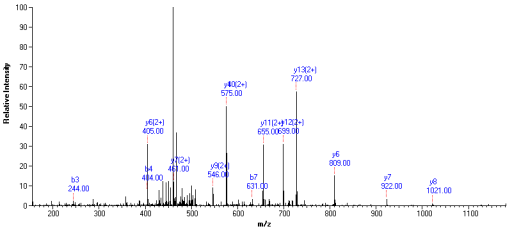

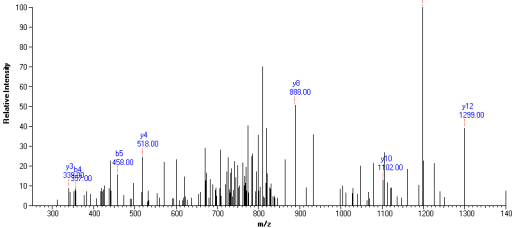

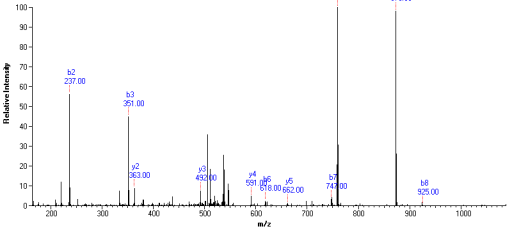



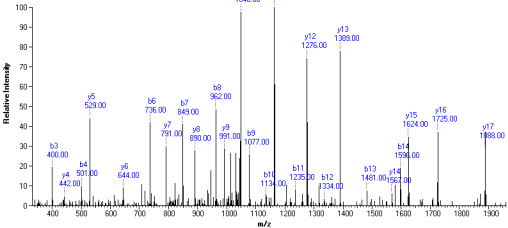

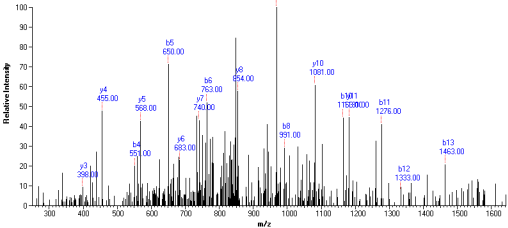

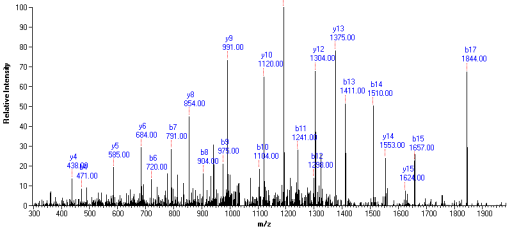

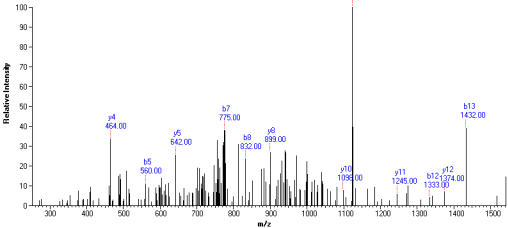

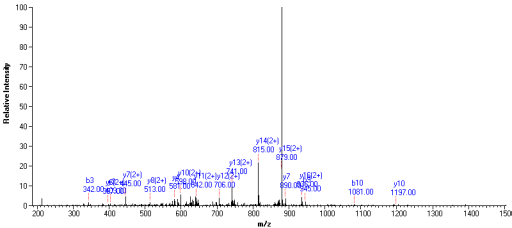

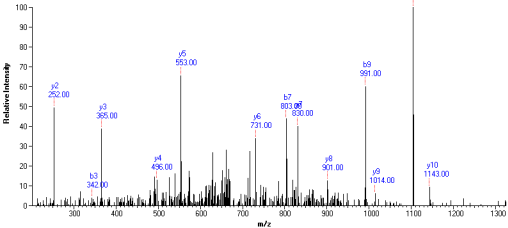

Peptide: \_VIHQALEDK(ac)IAQAPAFLK(Iy)\_Charge: 3+\_m/z: 684.06\_MassError: 1.3230342ppm\_RetentionTime: 39.339min\_MascotScore: 33.07

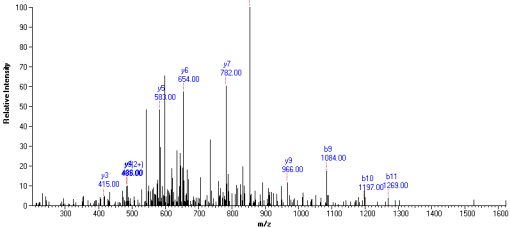

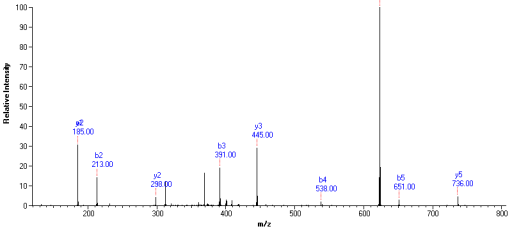



Peptide: \_VIK(ac)LDQK(Iy)\_ Charge: 2+\_ m/z: 451.29\_MassError: 1.6999668ppm\_RetentionTime: 12.735min\_MascotScore: 34.27

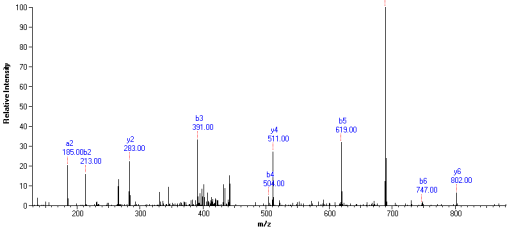

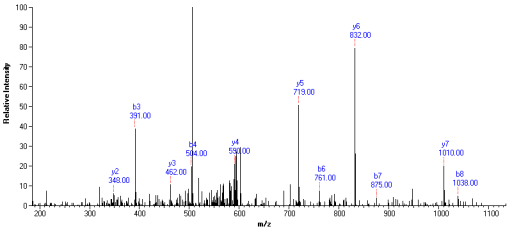

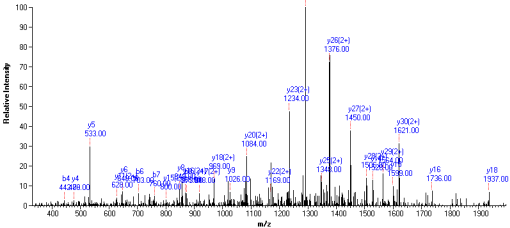

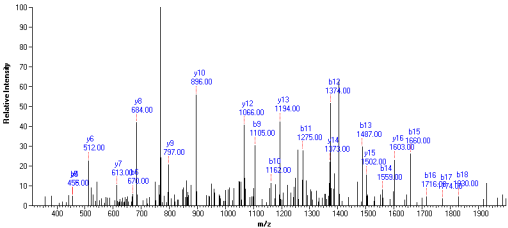

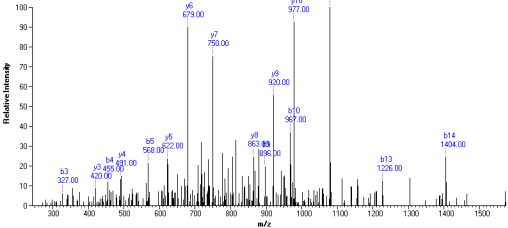

Peptide: \_VIPSLIAYTEPEVAWVGLTEK(ac)EAK(Iy)\_ Charge: 3+\_ m/z: 863.8\_MassError: 388.05775ppm\_RetentionTime: 49.307min\_MascotScore: 47.31

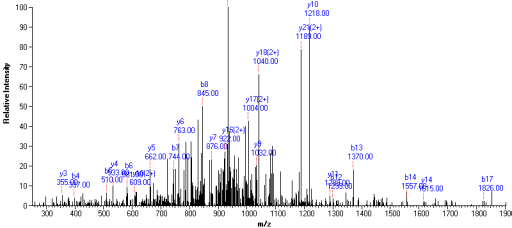

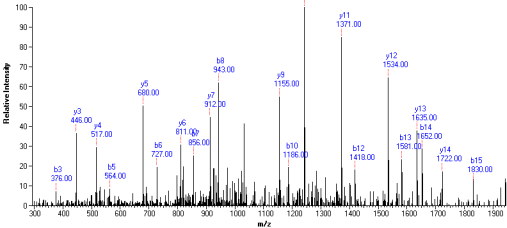

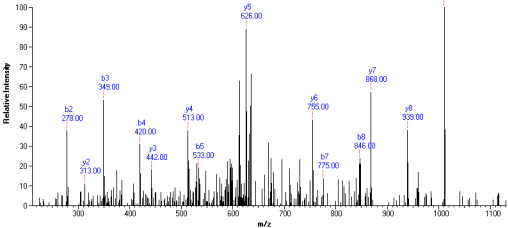



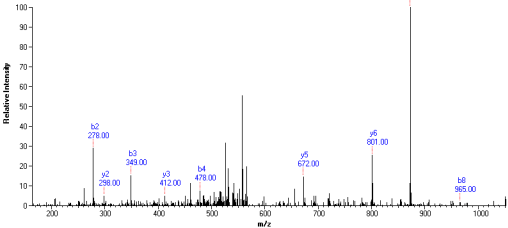

Peptide: \_VK(ac)ALLK(Iy)\_Charge: 2+\_m/z: 365.26\_MassError: 2.6597741ppm\_RetentionTime: 15.176min\_MascotScore: 30.84

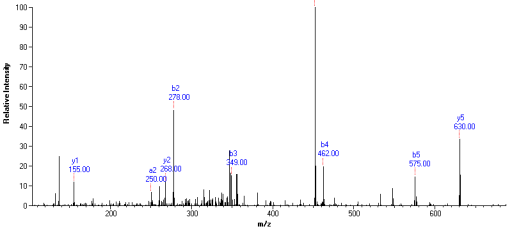

Peptide: \_VK(ac)AMMLK(Iy)\_Charge: 2+\_m/z: 439.76\_MassError: -0.64677518ppm\_RetentionTime: 14.7min\_MaxcotScore: 30.38

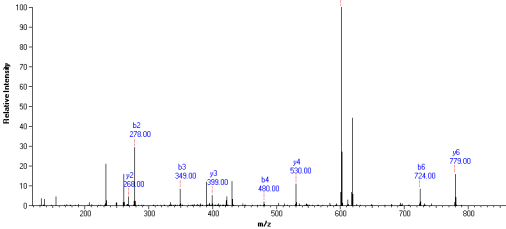

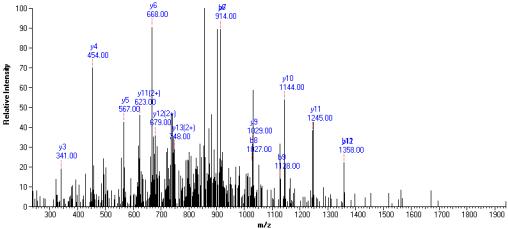

Peptide: \_VK(ac)FEVK(Iy)\_Charge: 2+\_m/z: 404.25\_MassError: 1.6844659ppm\_RetentionTime: 15.585min\_MascotScore: 33.84

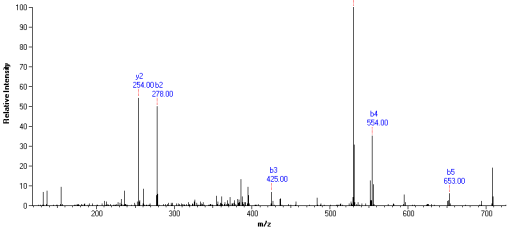

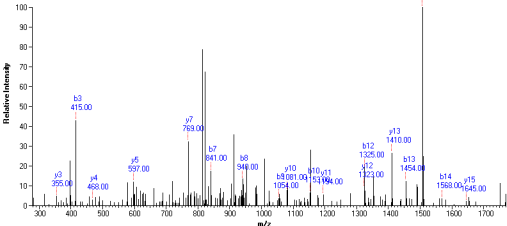

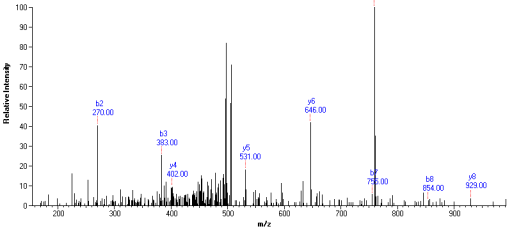

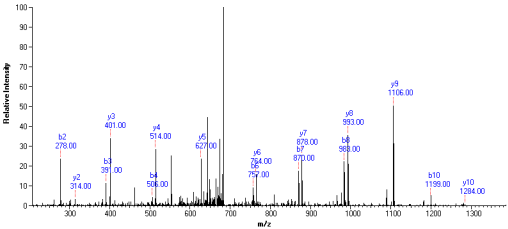



Peptide: \_VK[ac]INVLSSGK[ly]\_Charge: 2+\_m/z: 495.3\_MassError: 1.0657027ppm\_RetentionTime: 14.217min\_MascotScore: 33.34

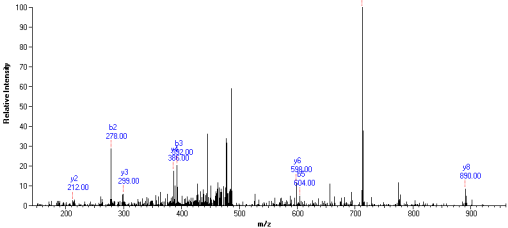

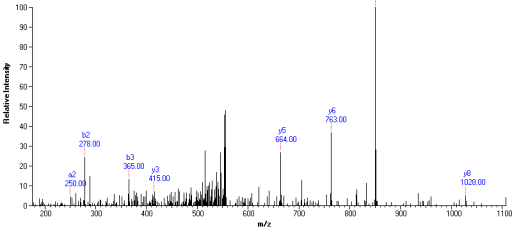

Peptide: \_VK(ac)TLLNEK(y)\_Charge: 2+\_m/z: 501.81\_MassError: 0.45172369ppm\_RetentionTime: 18.349min\_MascotScore: 49.9

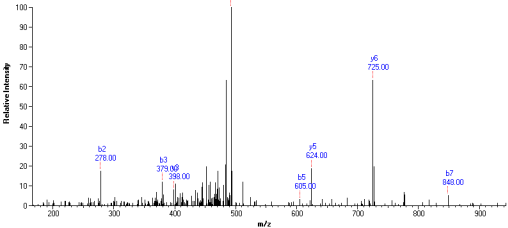

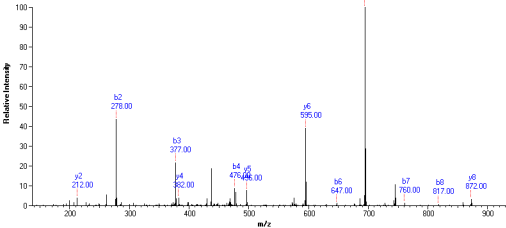

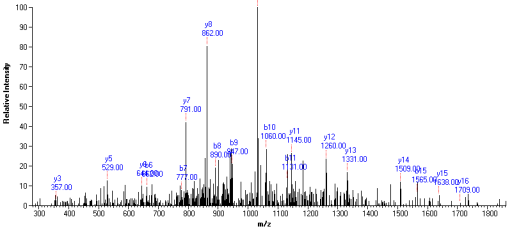

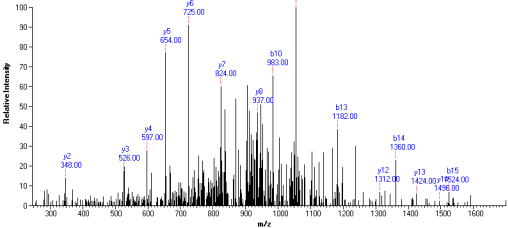

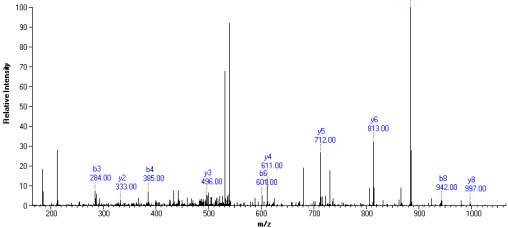

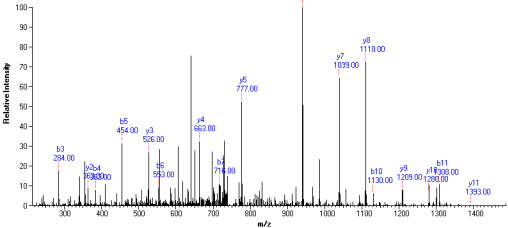



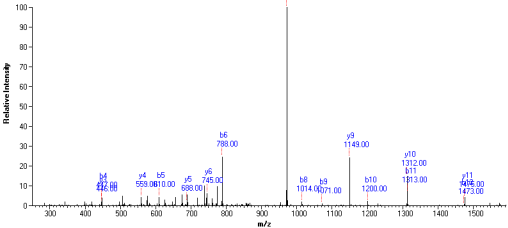

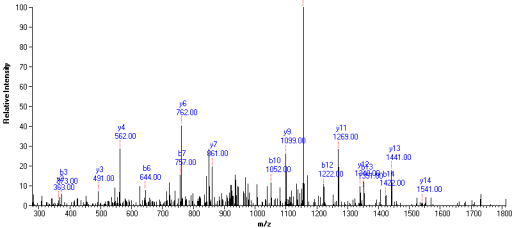

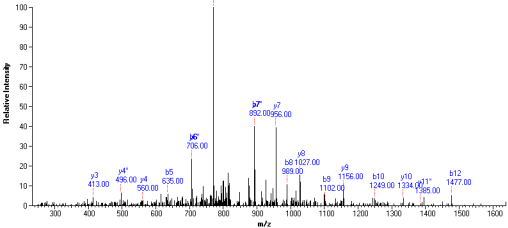

Peptide: \_VLDLIAHISK(ac)\_Charge: 2+\_m/z: 575.85\_MassError: 0.94586051ppm\_RetentionTime: 36.449min\_MascotScore: 67.03

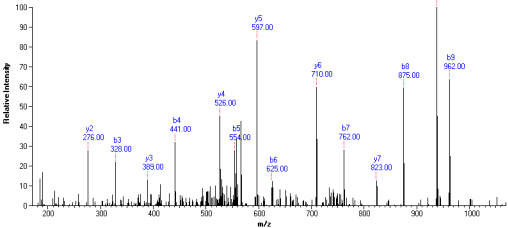

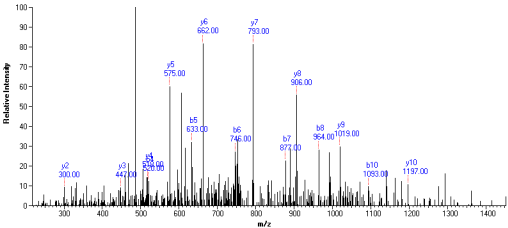

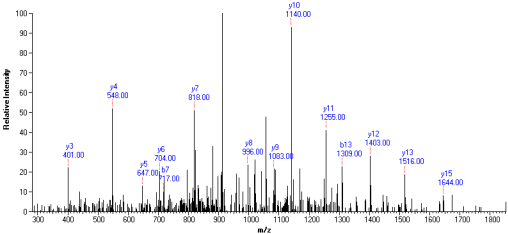

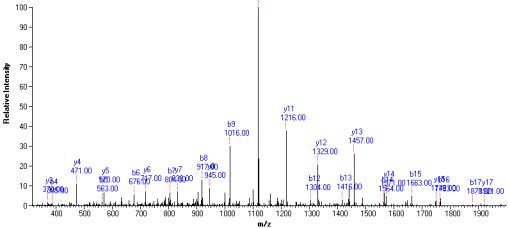

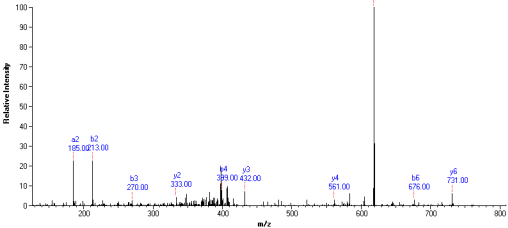



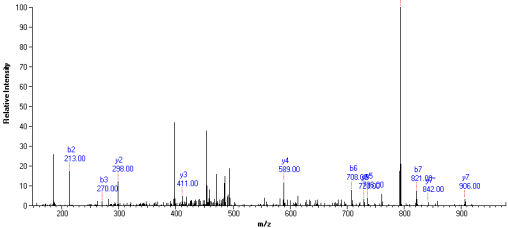

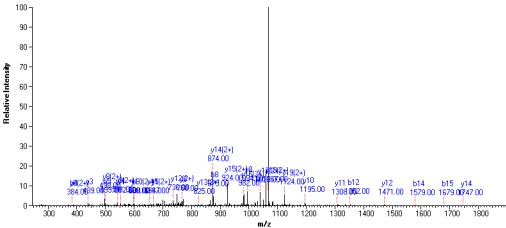

Relative Intensity

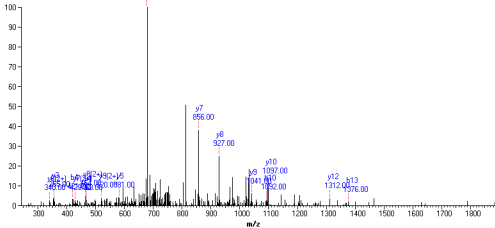

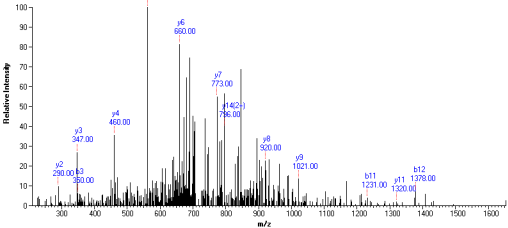

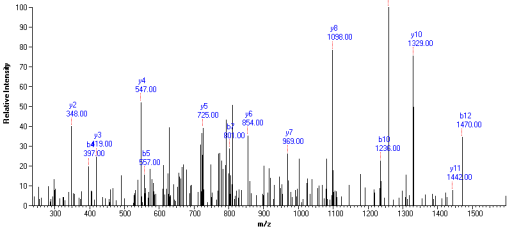

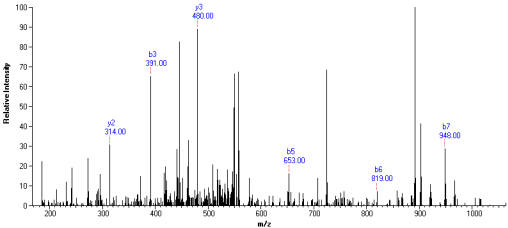

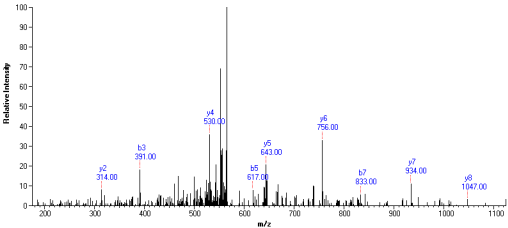

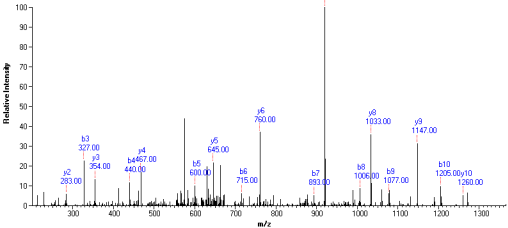



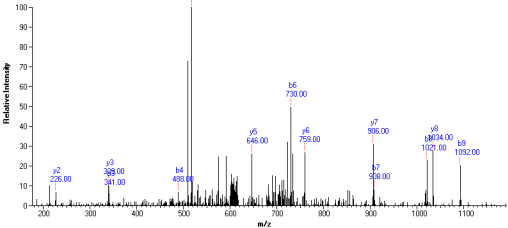

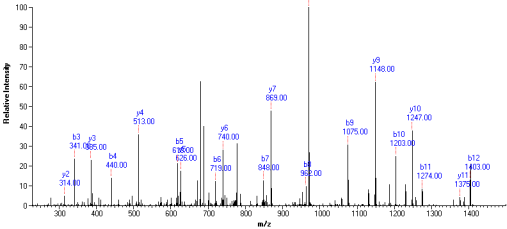

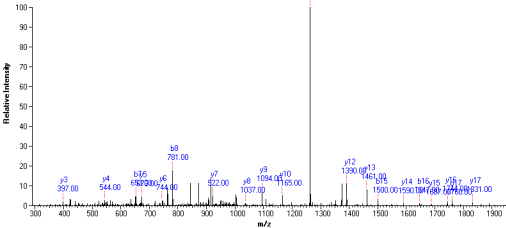

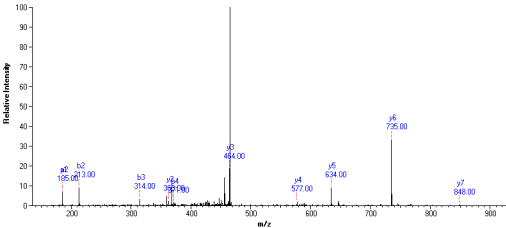

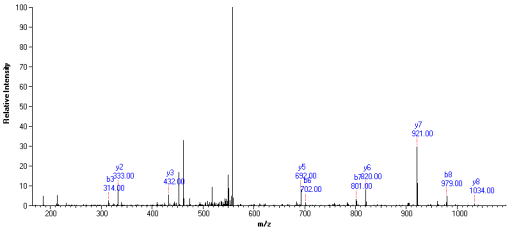

Peptide: \_VLTWDSDTK(ac)PECR\_Charge: 2+\_m/z: 824.89\_MassError: 0.95926596ppm\_RetentionTime: 26.255min\_MascotScore: 29.32

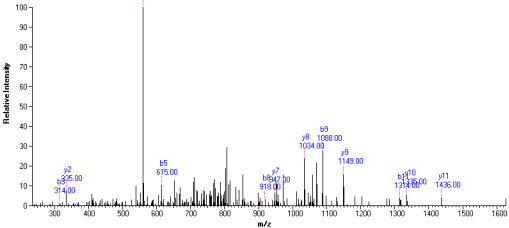

Peptide: \_VLVEK(jac)AVSM(ox)AR\_Charge:2+\_m/z: 639.87\_MassError:2.0512567ppm\_RetentionTime:20.794min\_MascotScore:94.23

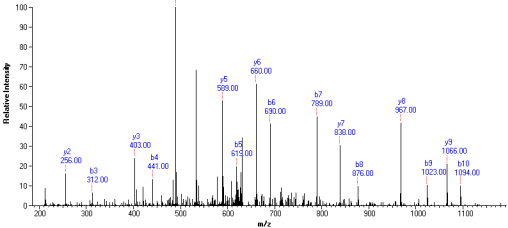

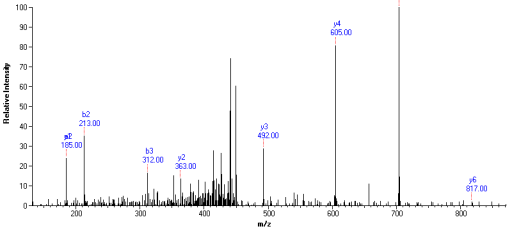



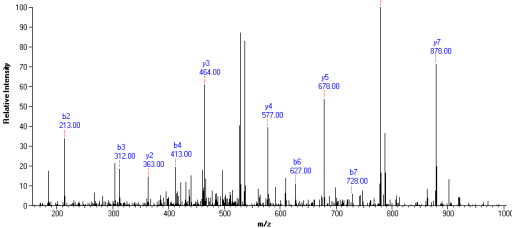

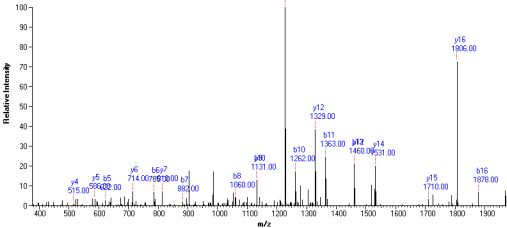

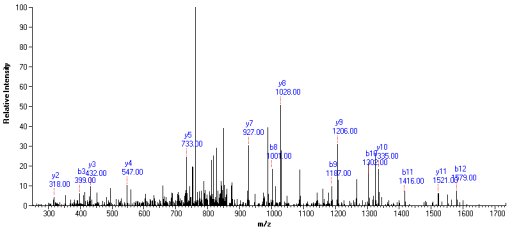

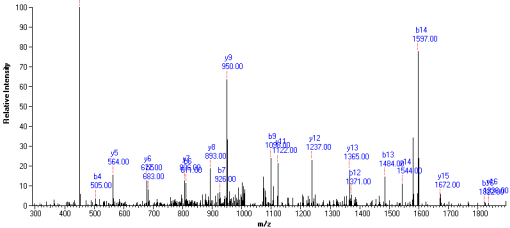

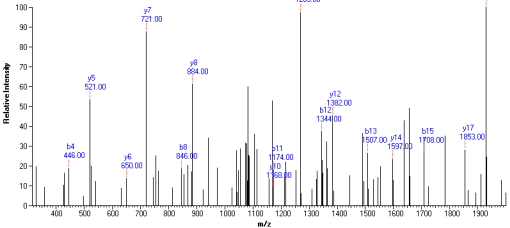

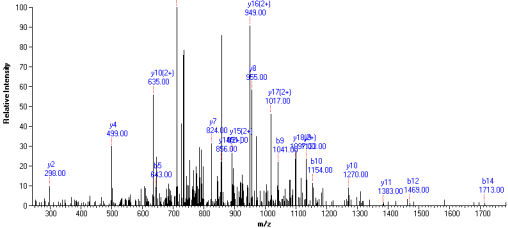

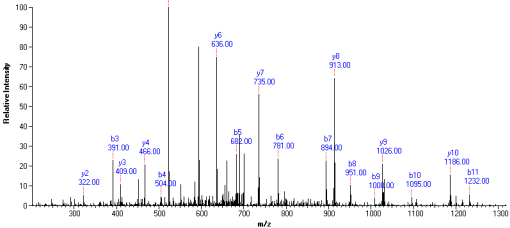

Peptide: VMDSNDLEK(ac)ER\_Charge: 2+\_m/z: 698.33\_MassError: 1.2796922ppm\_RetentionTime: 13.858min\_MascotScore: 71.51

Relative Intensity

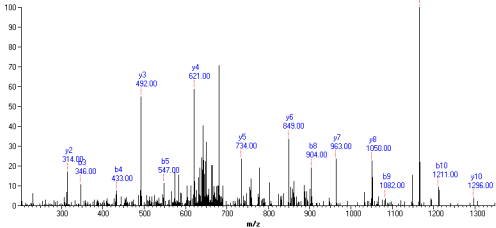



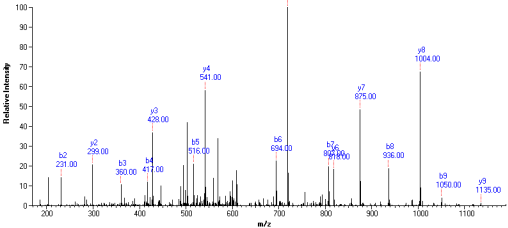

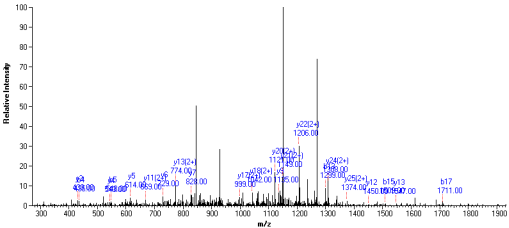

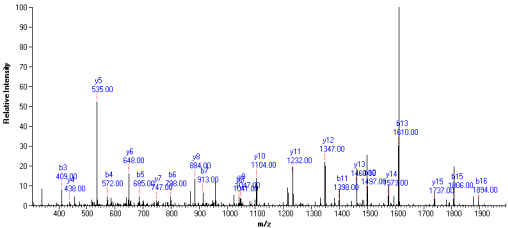

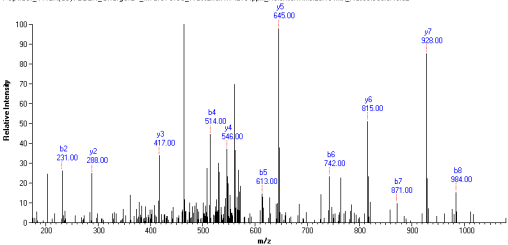

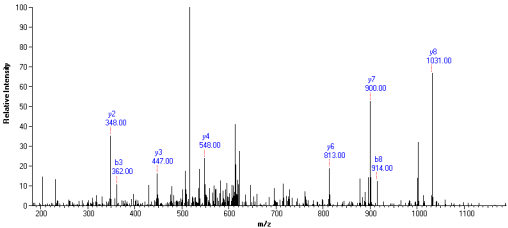

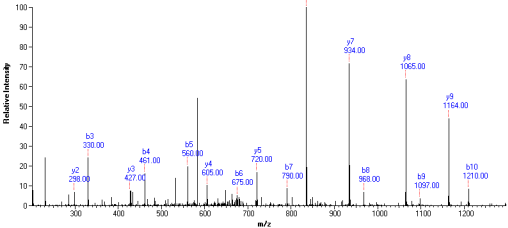

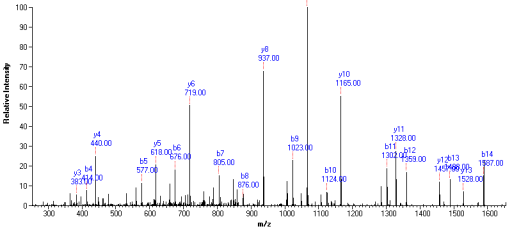

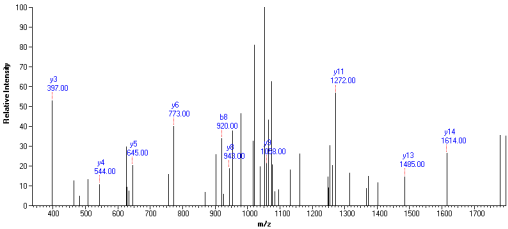



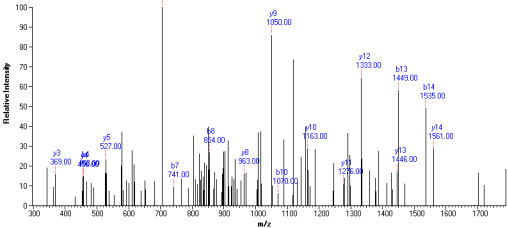

Peptide: \_VNEK(ac)AEVTIR\_Charge: 2+\_m/z: 609.84\_MassError: 1.1313545ppm\_RetentionTime: 18.66min\_MascotScore: 47.89

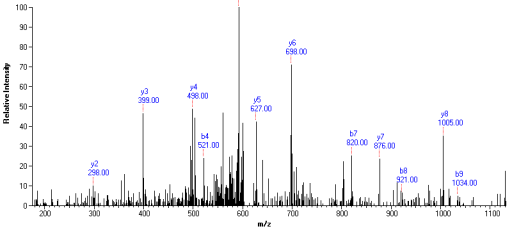

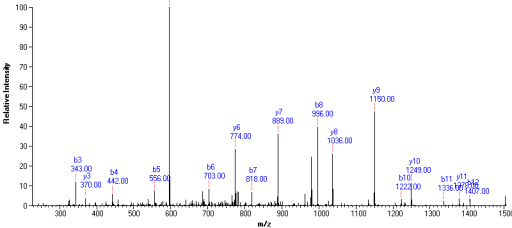

Peptide: \_VNK(ac)QWLR\_Charge: 2+\_m/z: 502.29\_MassError: 0.67778209ppm\_RetentionTime: 22.057min\_MassotScore: 32

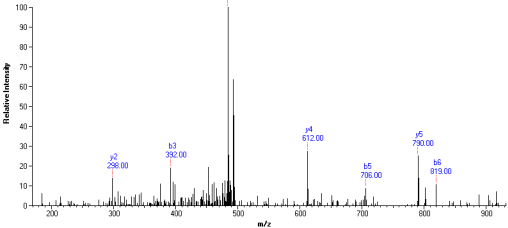

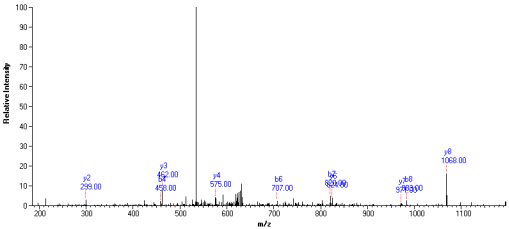

Peptide: \_VNVGDK(ac)YK(Iy)\_ Charge: 2+\_m/z: 458.78\_MassError:2.6404135ppm\_RetentionTime:9.7284min\_MascotScore:29.05

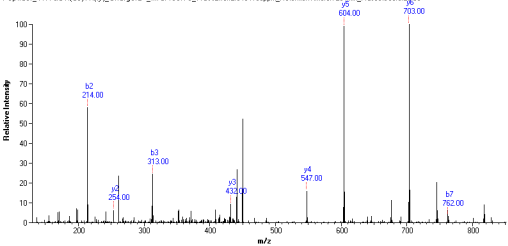

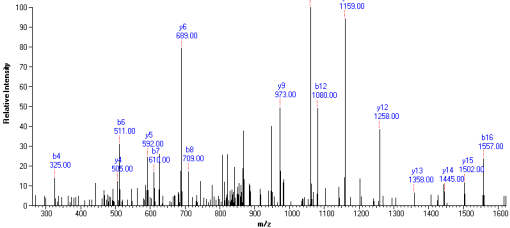

Peptide: \_VPEPFIPK(ac)SGAR\_Charge: 2+\_m/z: 679.38\_MassError: -0.59484089ppm\_RetentionTime: 26.796min\_MascotScore: 49.99

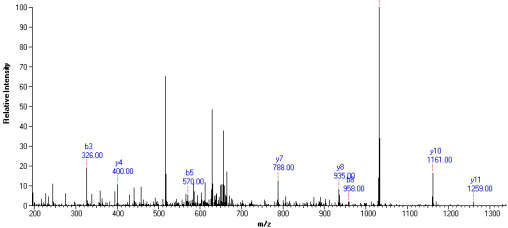



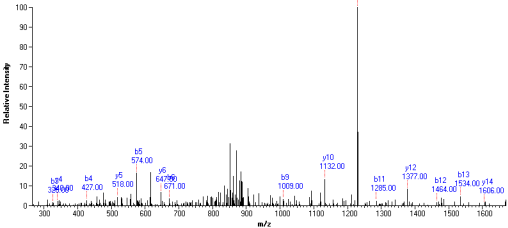

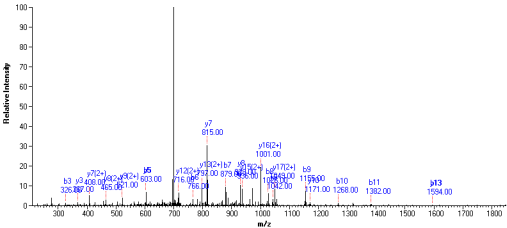

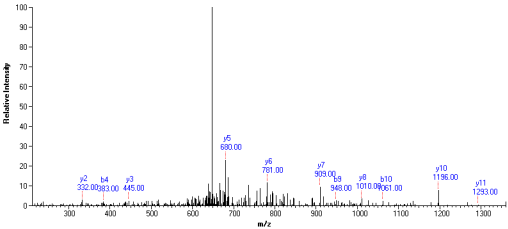

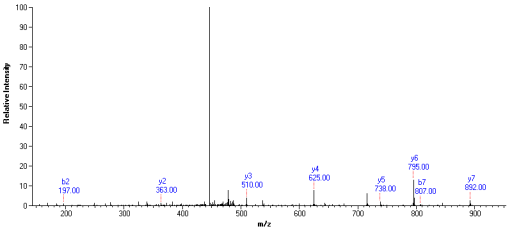

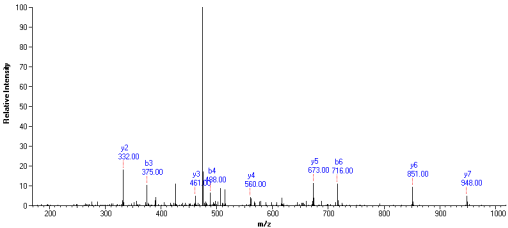

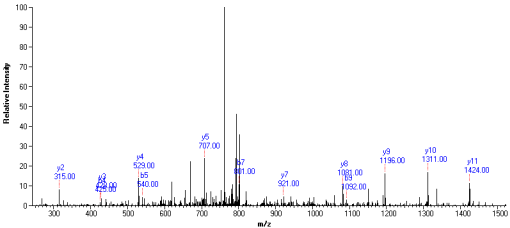

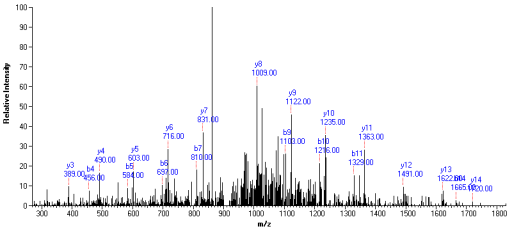

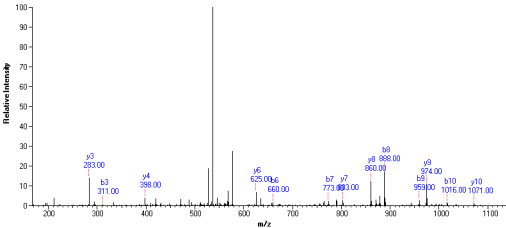



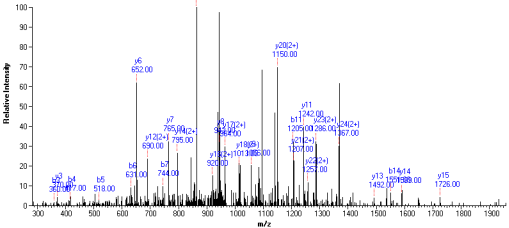

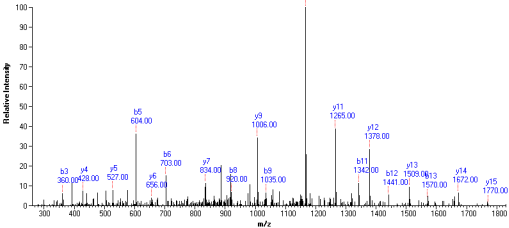

Peptide: VQAIEK(ac)NR\_Charge: 2+\_m/z: 509.29\_MassError: -0.30927871ppm\_RetentionTime: 7.6499min\_MaxcotScore: 44.71

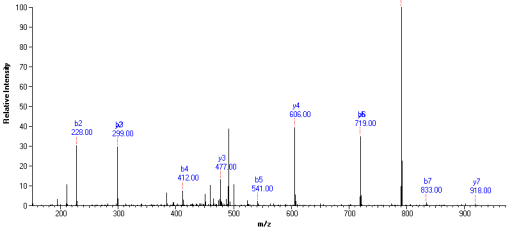

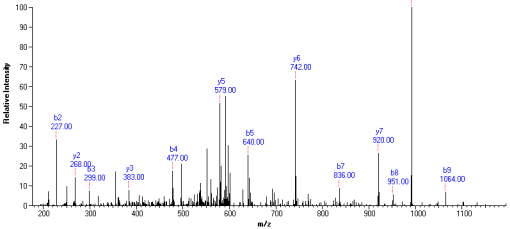

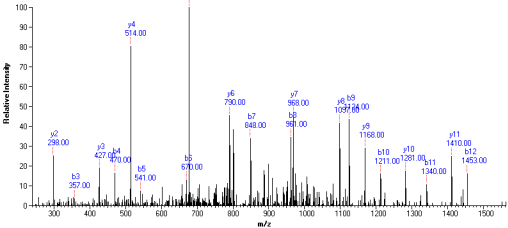

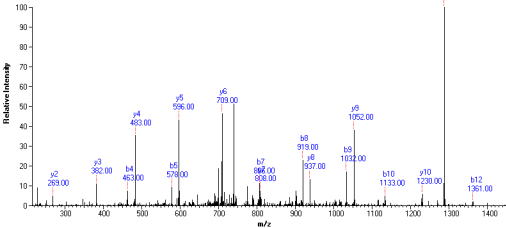

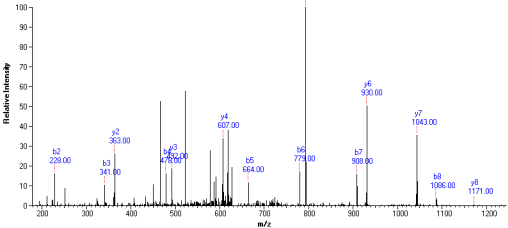

Peptide: \_VQLK[ac]YLEVQGM[ox]K[y]\_ Charge: 2+\_ m/z: 723.42\_ MassError: 0.7005806ppm\_ RetentionTime: 29.286min\_ MascotScore: 52.16

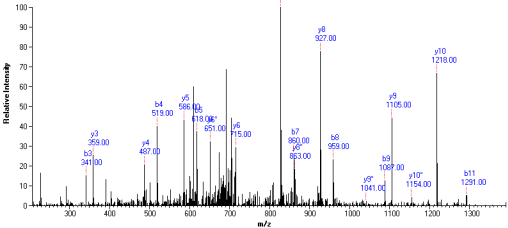



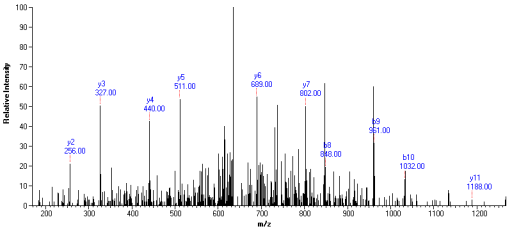

Peptide: \_VSDEQLK(ac)AM(ox)LAK(jy)\_Charge:2+ m/z: 703.88\_MassError:0.76986666ppm\_RetentionTime:27.302min\_MascotScore:33.17

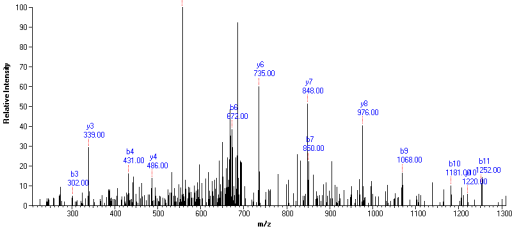

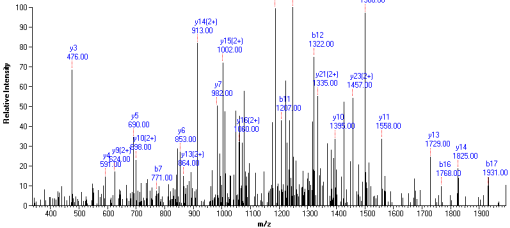

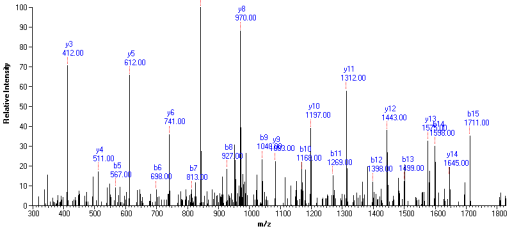

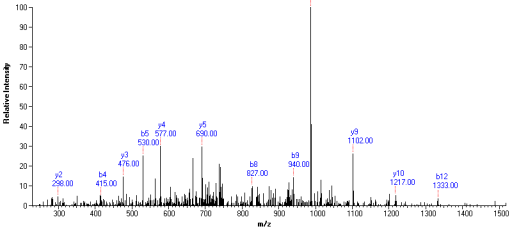

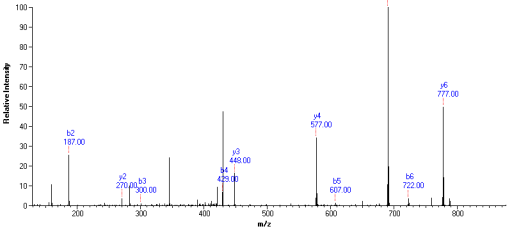

Peptide: \_VSLEK(jac)LVEAYR\_Charge: 2+\_m/z: 683.89\_MassError: 0.70481746ppm\_RetentionTime: 41.88min\_MascotScore: 65.99

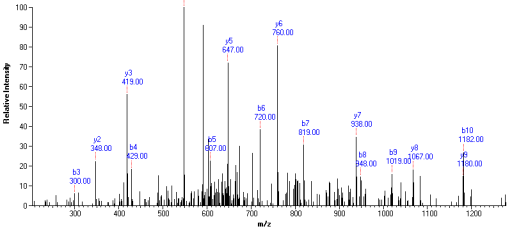

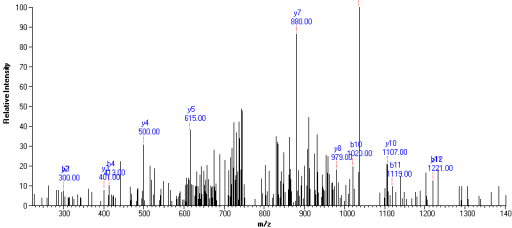



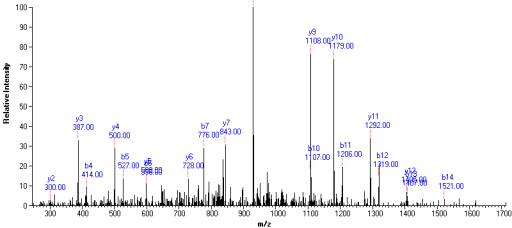

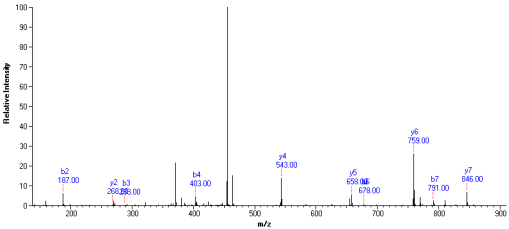

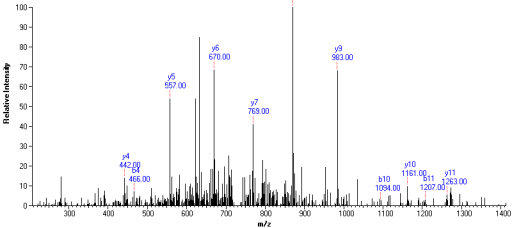

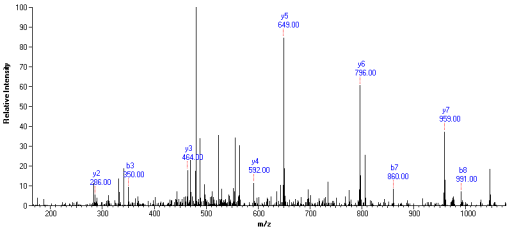

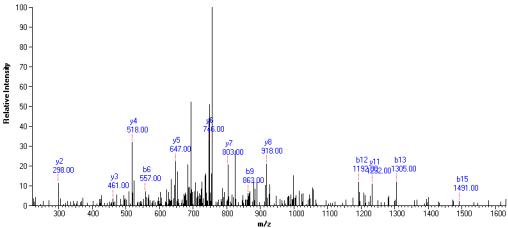

Peptide: \_VTAVEAK(ac)EDGIYVTM(ox)EGK(Iy)\_Charge: 2+\_m/z: 1008\_MassError: 3.4402375ppm\_RetentionTime: 31.462min\_MascotScore: 65.94

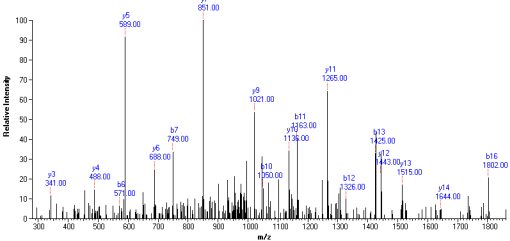

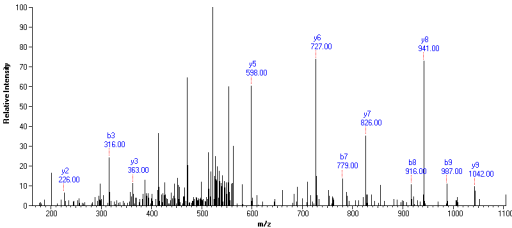

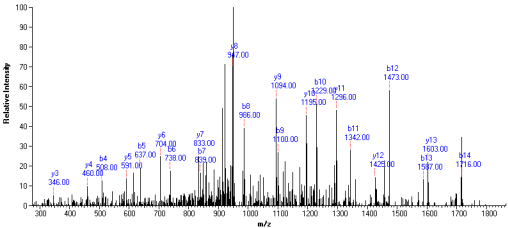



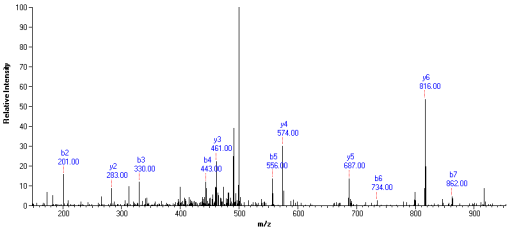

Peptide: \_VTFK(ac)EDNSLPVR\_Charge:2+\_m/z: 732.9\_MassError:1.4587596ppm\_RetentionTime:26.783min\_MascotScore:51.78

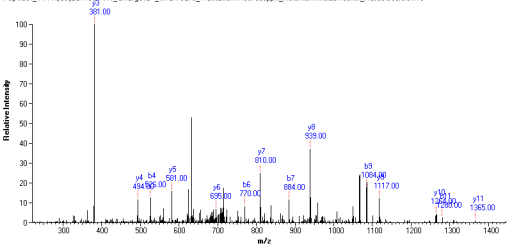

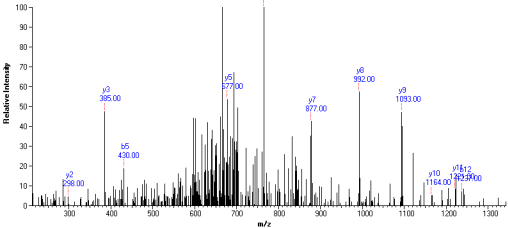

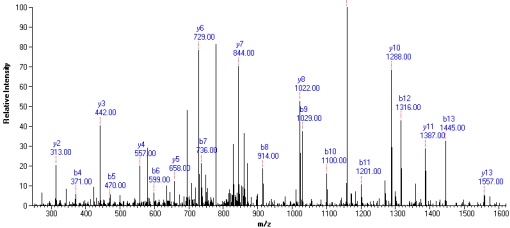

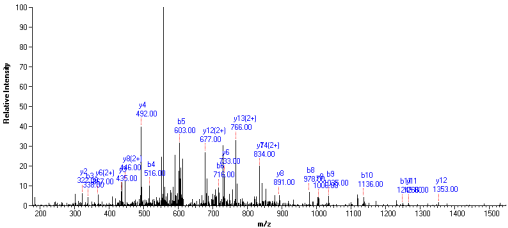

Peptide: \_VTIEGWNGPVEIDQIK(ac)GK(Iy)\_ Charge: 2+\_m/z: 1021.56\_MassError: 4.1140114ppm\_RetentionTime: 39.988min\_MascotScore: 33.92

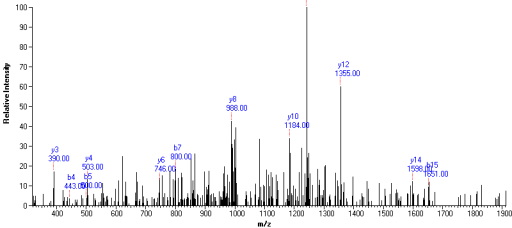

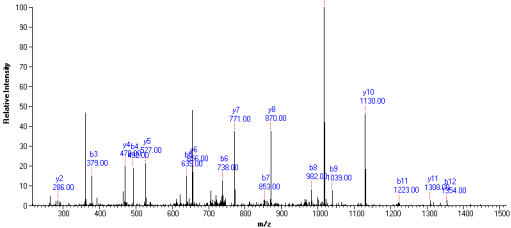

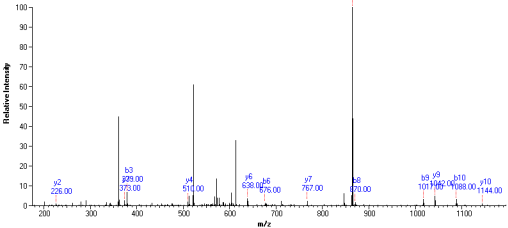



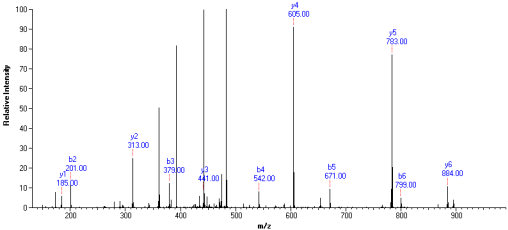

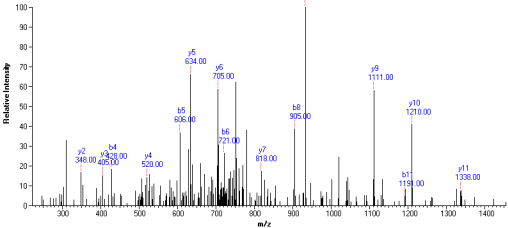

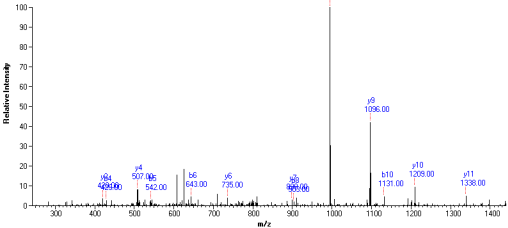

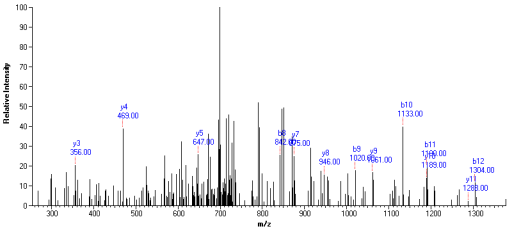

Peptide: \_VTYVK(ac)YLQIAR\_Charge:2+\_ m/z:669.4\_MassError:0.81749971ppm\_RetentionTime:28.586min\_MascotScore:59.42

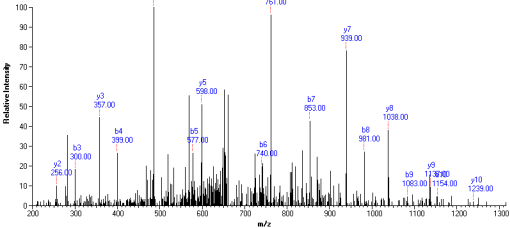

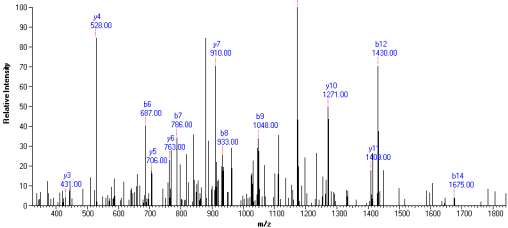

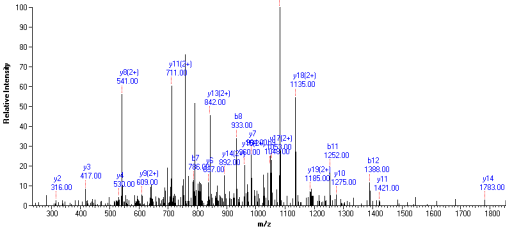

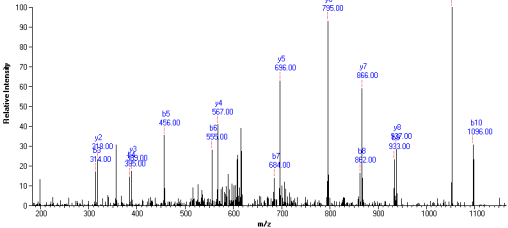



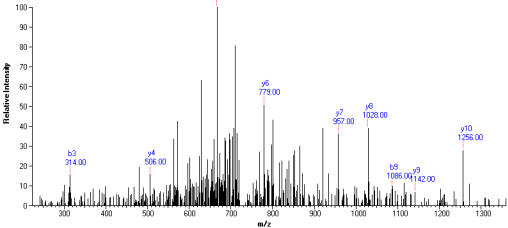

Peptide: \_VVDK(ac)SWVSR\_Charge: 2+\_m/z: 568.32\_MassError: 3.7200107ppm\_RetentionTime: 20.533min\_MascotScore: 37.93

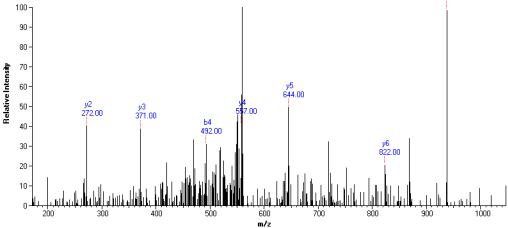

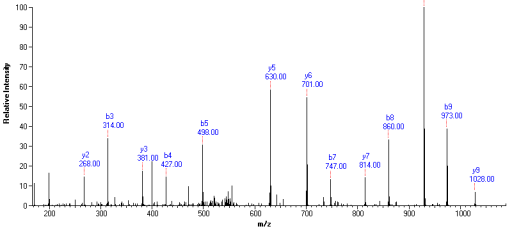

Peptide: \_VVEALEK(ac)K[ly]\_ Charge: 2+ \_m/z: 487.3 \_MassError: 0.20723391ppm \_RetentionTime: 10.896min \_MascotScore: 36.66

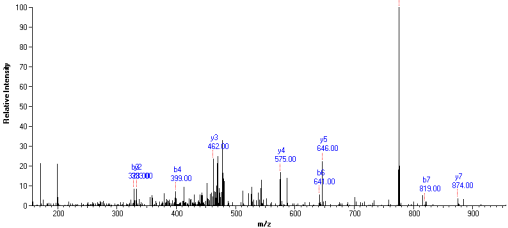

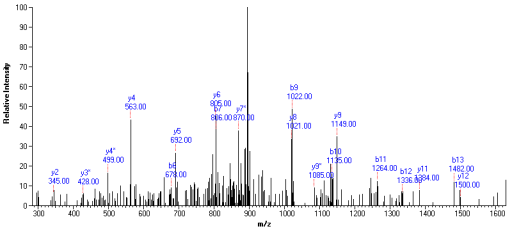

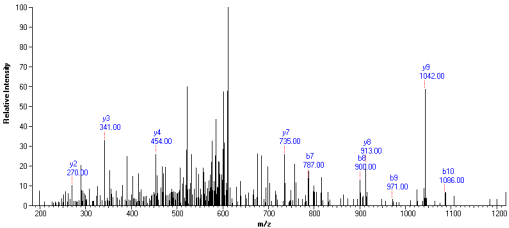

Peptide: \_VVEK(ac)NISDVR\_Charge: 2+\_m/z: 600.83\_MassError: 1.3717493ppm\_RetentionTime: 13.317min\_MascotScore: 50.98

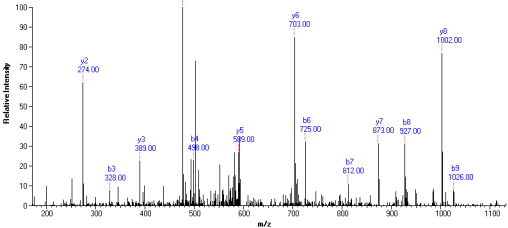

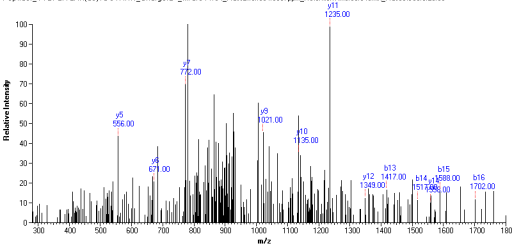



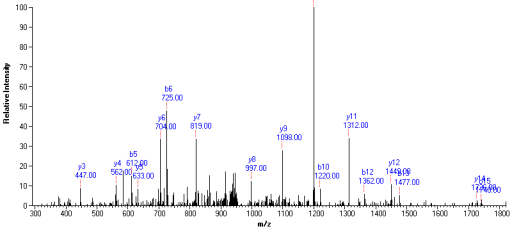

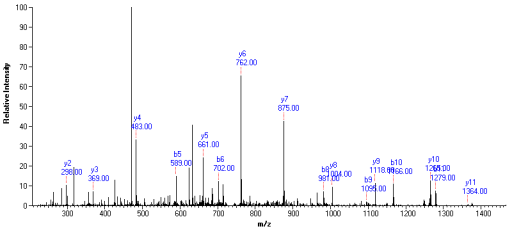

Peptide: \_VVGAVTQM(ox)GLK(ac)FR\_Charge: 2+\_m/z: 741.42\_MassError: -1.5134443ppm\_RetentionTime: 26.85min\_MascotScore: 52.84

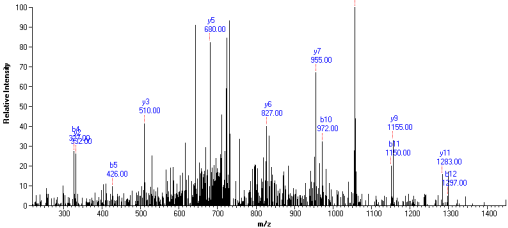

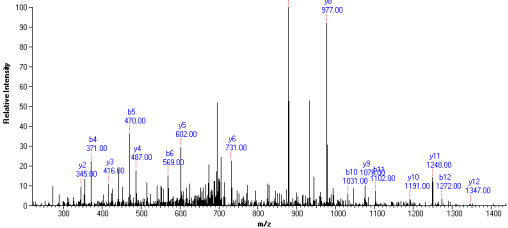

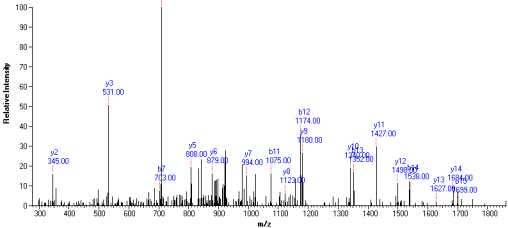

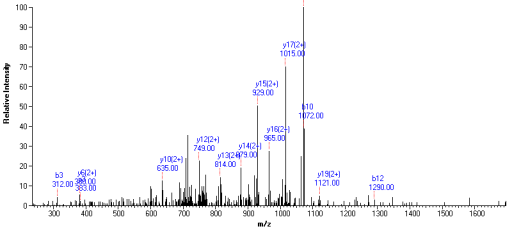

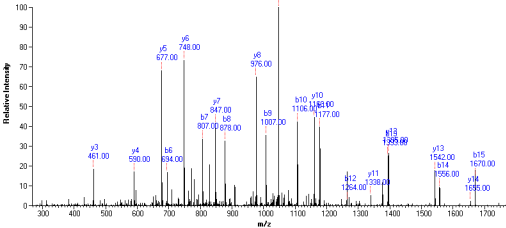

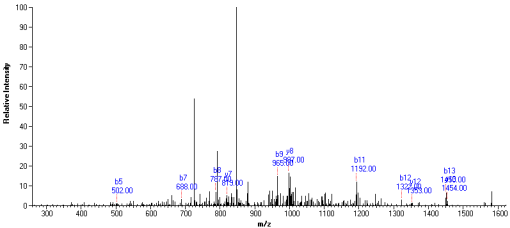



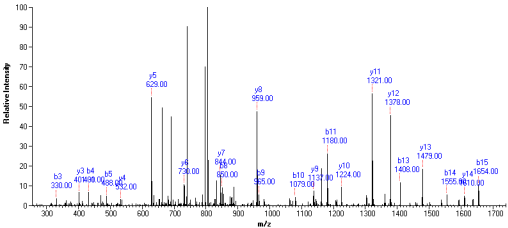

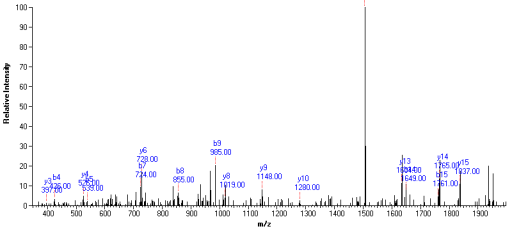

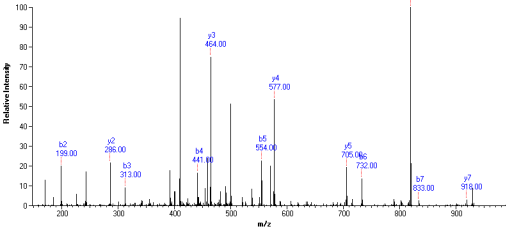

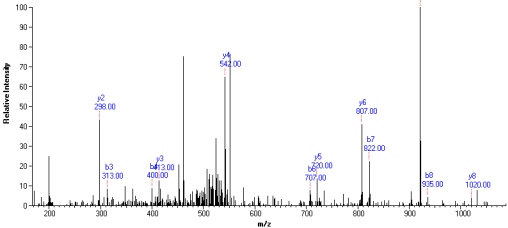

Peptide: \_VVSDK(ac)MEK(Iy)\_Charge: 2+\_m/z: 497.27\_MassError: -0.084262021 ppm\_RetentionTime: 11.402min\_MascotScore: 52.74

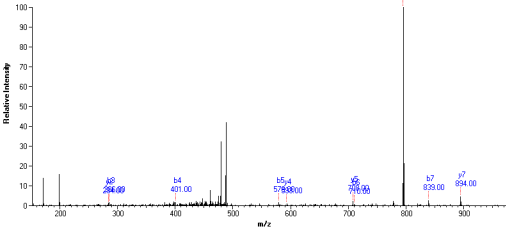

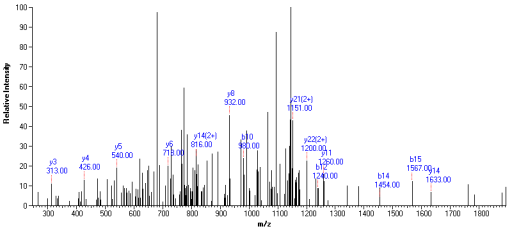

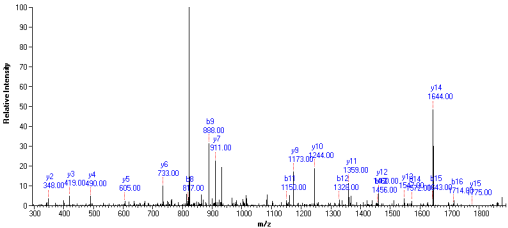

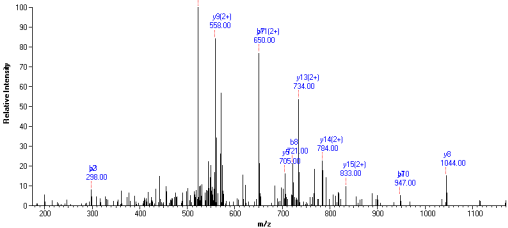



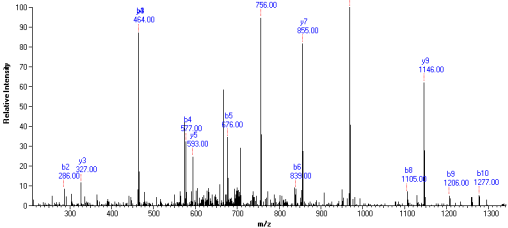

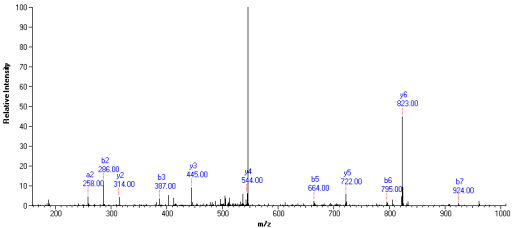

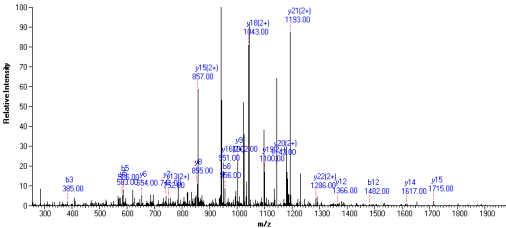

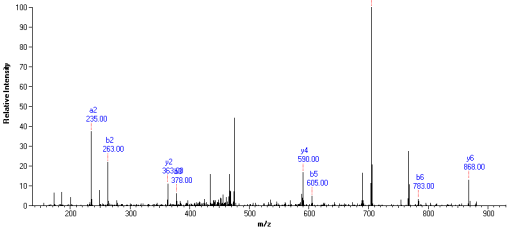

Peptide: \_VYEQFLPK(ac)AQK(ly)\_Charge:2+\_m/z:704.89\_MassError:0.95699727ppm\_RetentionTime:22.211min\_MascotScore:50.2

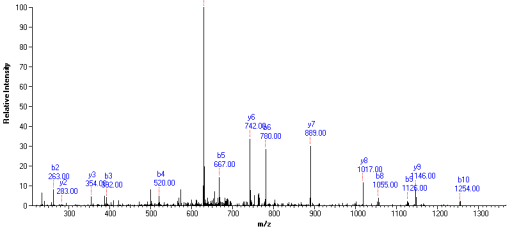

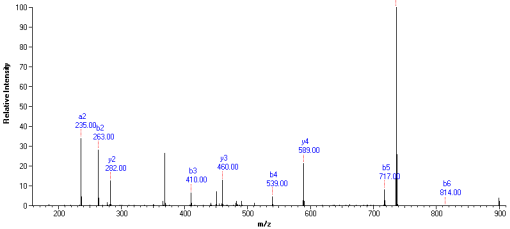

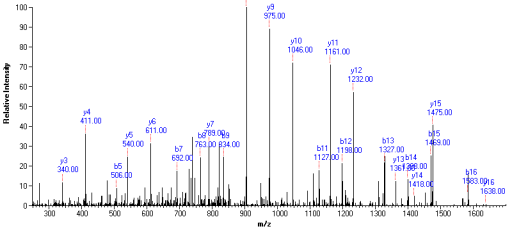

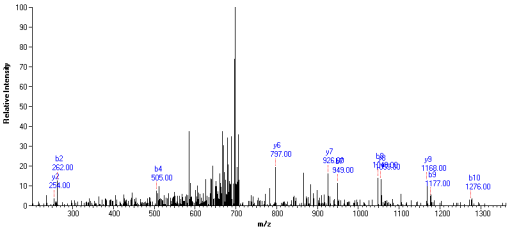



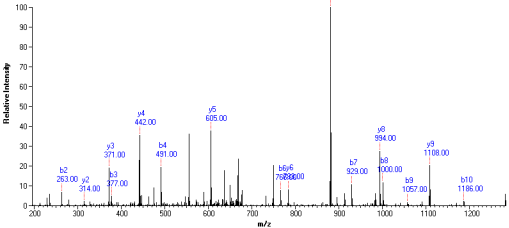

Peptide: \_VYQSEQAEK(ac)LLLAGYM(ox)LR\_C Charge: 3+\_m/z: 708.72\_MassError: 1.943368ppm\_RetentionTime: 45.299min\_MascotScore: 51.68

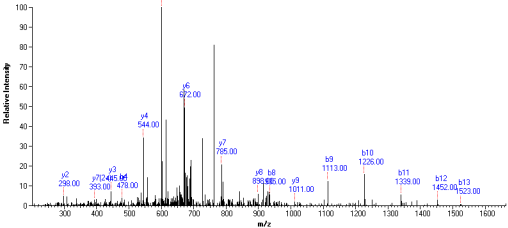

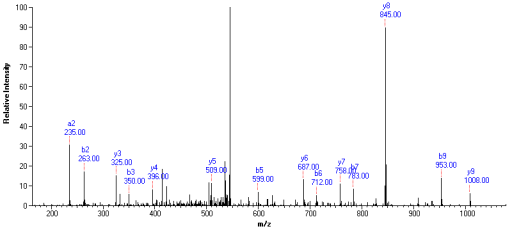

Peptide: \_VYSK(ac)LTSENPIDLVR\_Charge:2+\_m/z: 897.49\_MassError:1.2628782ppm\_RetentionTime: 38.454min\_MascotScore: 32.9

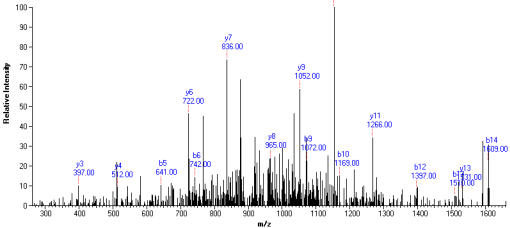

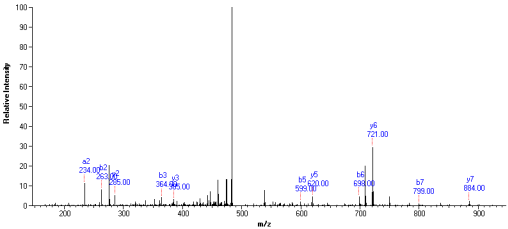

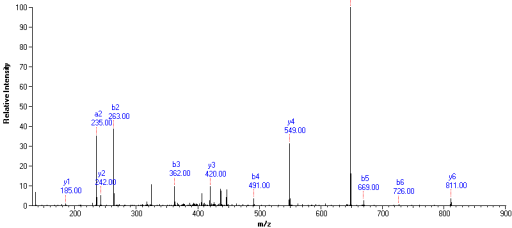

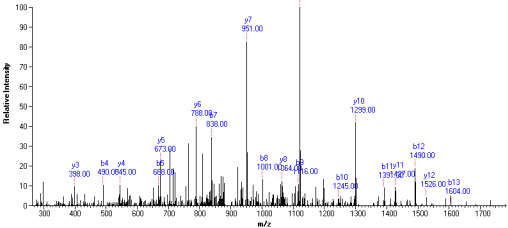

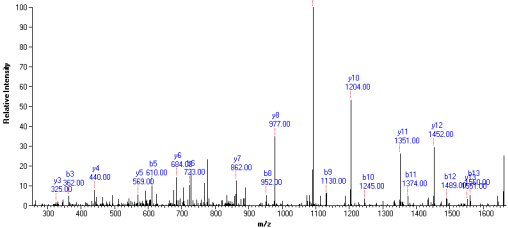



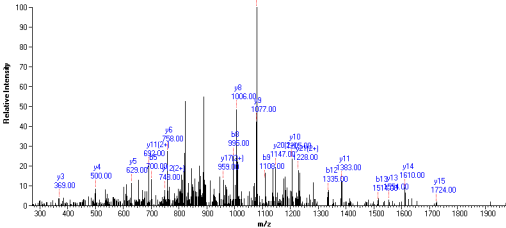

Peptide: \_WACK(ac)ELGLVATDTRL\_Charge: 2+\_m/z: 896.97\_MassError: 191.33944ppm\_RetentionTime: 35.346min\_MascotScore: 79.96

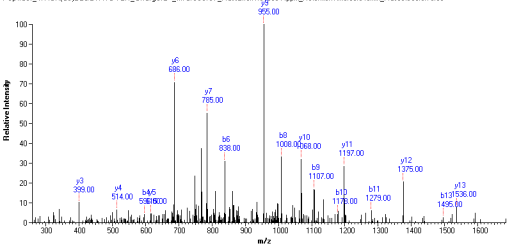

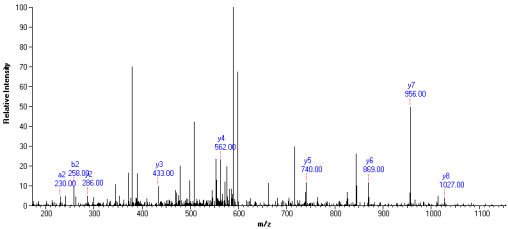

Peptide: \_WCYK(ac)PFEDLIQPAR\_Charge: 2+\_m/z: 941.97\_MassError: -1606.5541ppm\_RetentionTime: 45.815min\_MascotScore: 40.53

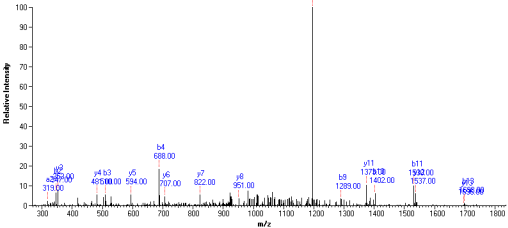

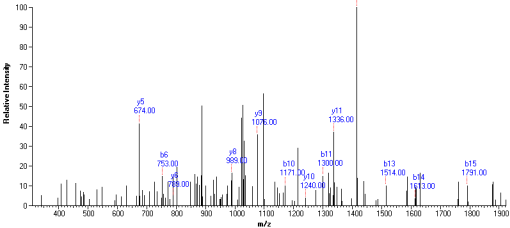

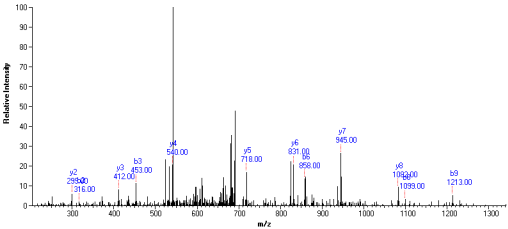

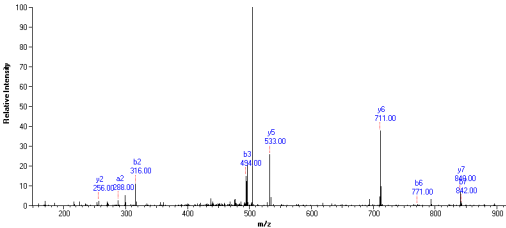

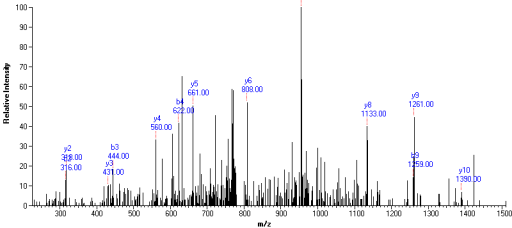



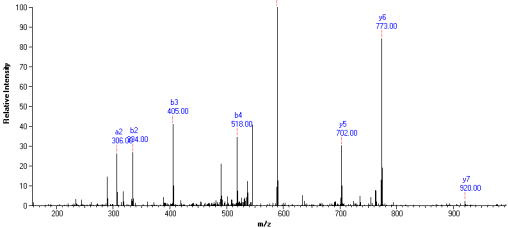

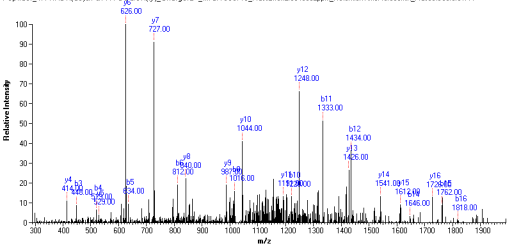

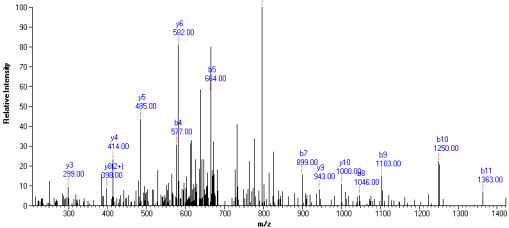

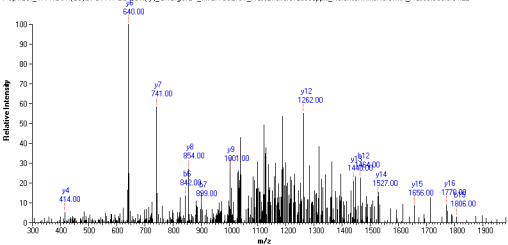

Peptide: \_WGYFDK(ac)AGQMR\_Charge: 2+ m/z: 709.84\_MassError: 0.33403156ppm\_RetentionTime: 33.019min\_MascotScore: 76.44

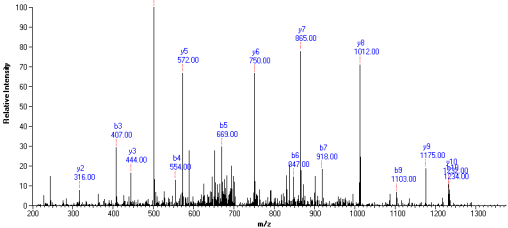

Peptide: \_WK(ac)EGEATLAPSLDLYGK(ly)\_Charge: 2+\_m/z: 936.51\_MassError: 1.4535272ppm\_RetentionTime: 38.369min\_MascotScore: 76.31

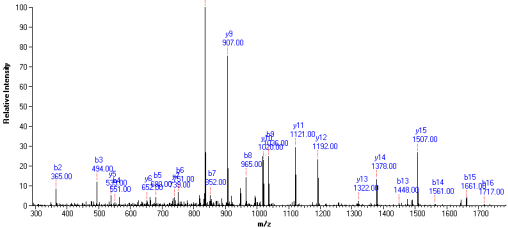

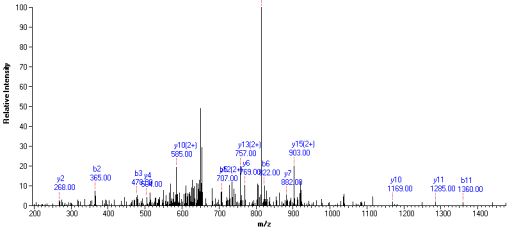

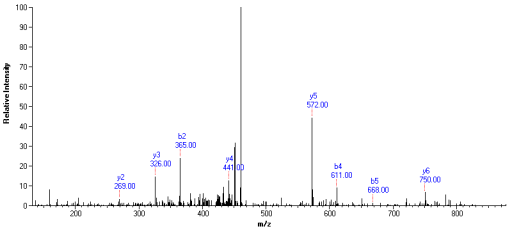



Peptide: \_WLGGLTNWK(ac)TYR\_Charge:2+\_m/z:811.44\_MassError:0.80389449ppm\_RetentionTime:39.674min\_MascotScore:73.67

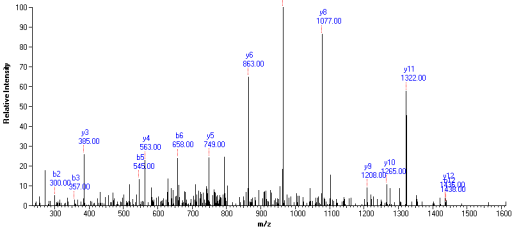

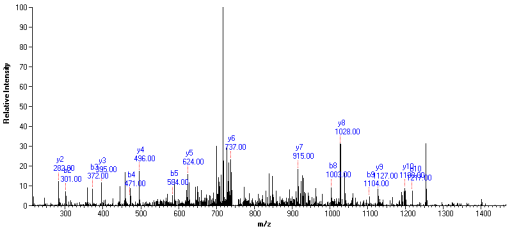

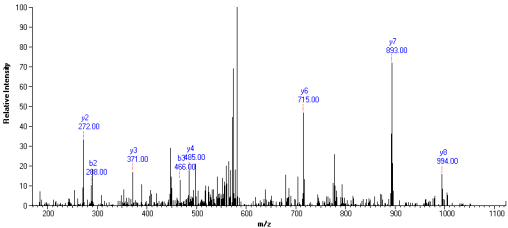

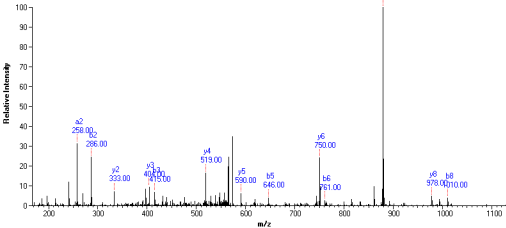

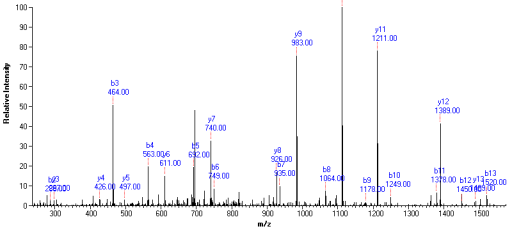

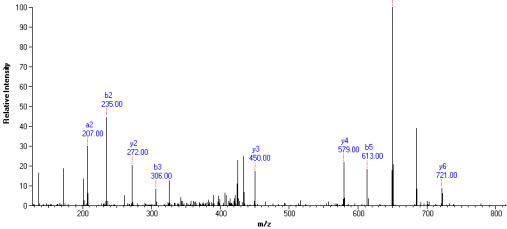

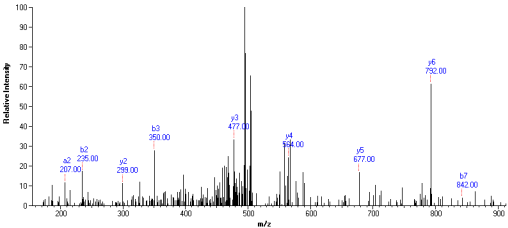

Peptide: \_YAEGYPGK[ac]R\_Charge: 2+\_m/z: 550.78\_MassError: 2.1100381ppm\_RetentionTime: 14.887min\_MascotScore: 62.54

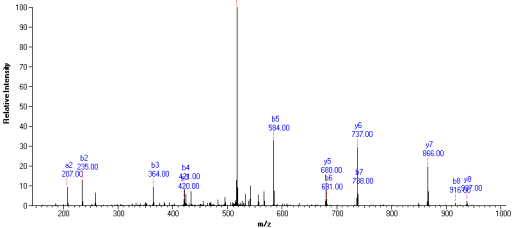



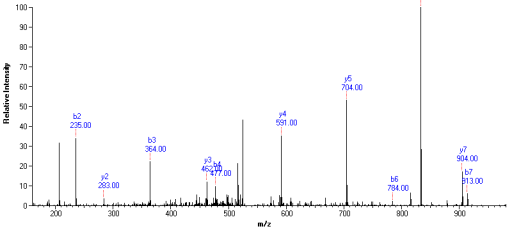

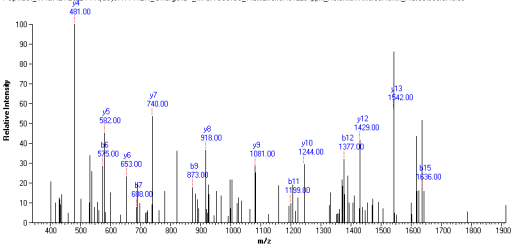

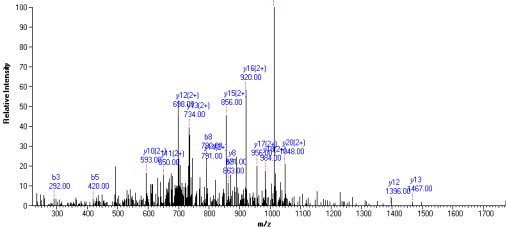

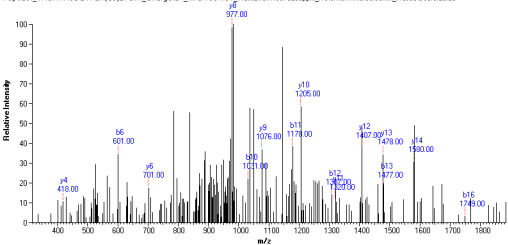

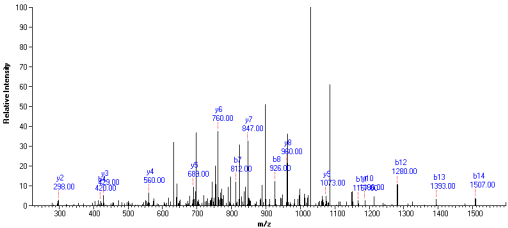

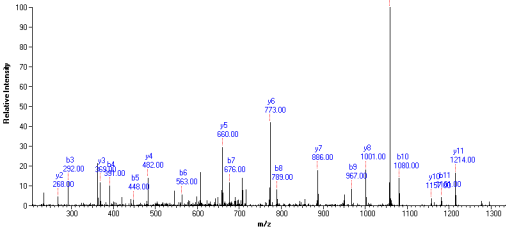

Peptide: \_YAHIGTGNFNEK(ac)TAR\_Charge: 2+\_m/z: 869.94\_MassError: 1.0916189ppm\_RetentionTime: 14.184min\_MascotScore: 37.17

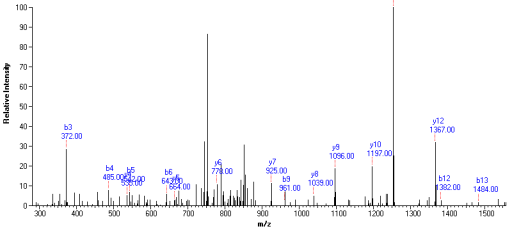

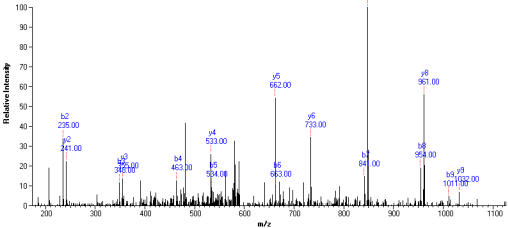



Peptide: \_YAK(ac)LSEK(Iy)\_ Charge: 2+\_ m/z: 448.76\_MassError: 2.0832333ppm\_RetentionTime: 12.692min\_MascotScore: 42.98

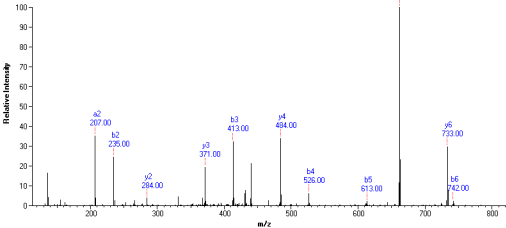

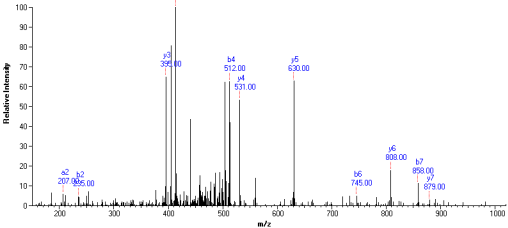

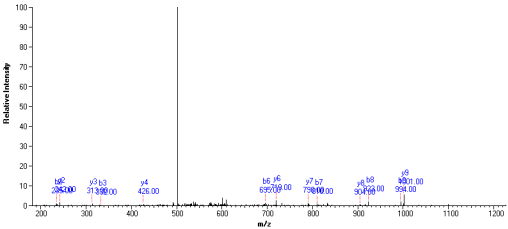

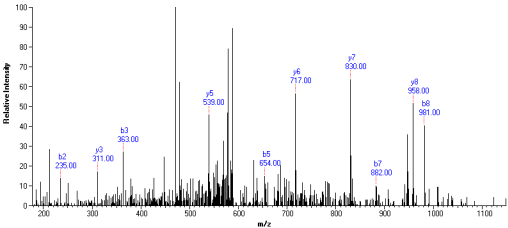

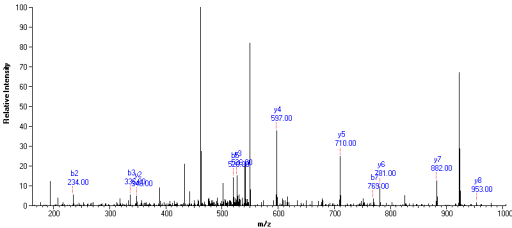

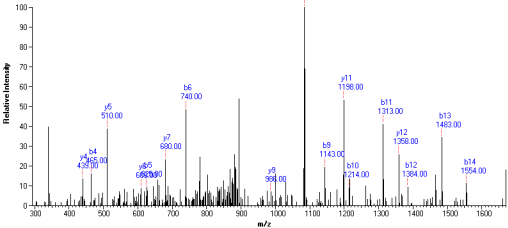

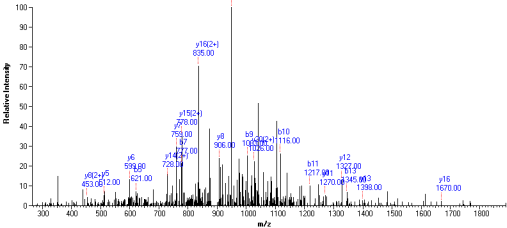

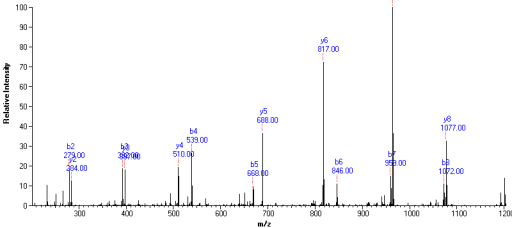



Peptide: \_YDIK(ac)VIGINR\_Charge: 2+\_m/z: 625.87\_MassError: 0.56551792ppm\_RetentionTime: 31.944min\_MascotScore: 60.42

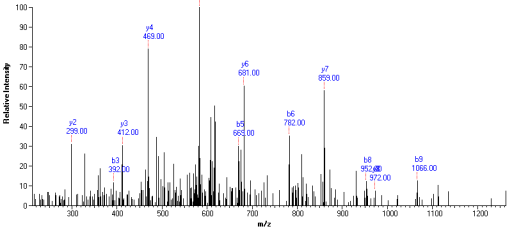

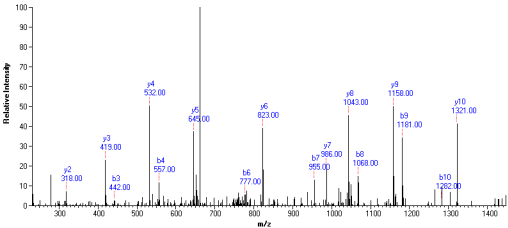

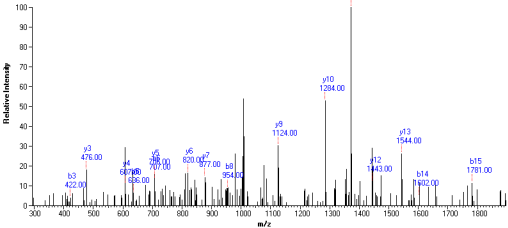

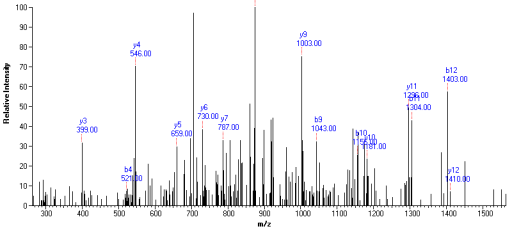

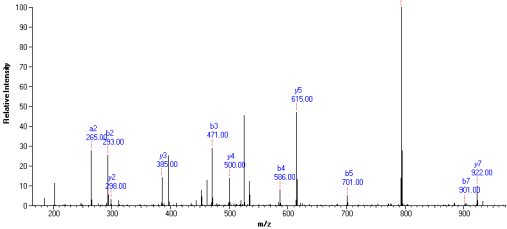

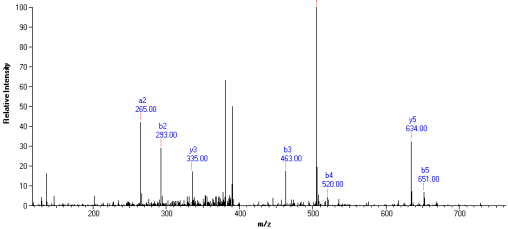

Peptide: \_YEK(ac)STDGIAK\_Charge: 2+\_m/z: 577.29\_MassError: 2.2370105ppm\_RetentionTime: 10.029min\_MascotScore: 43.04

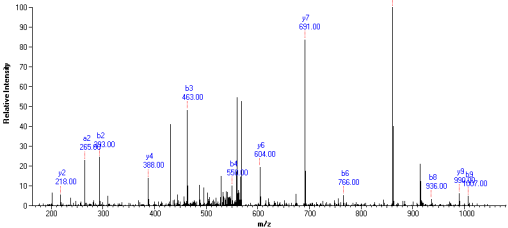

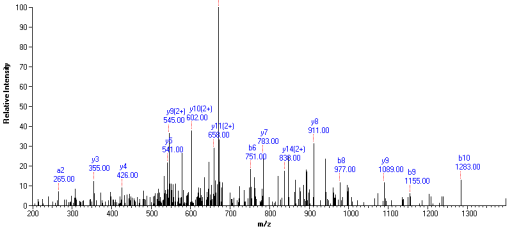



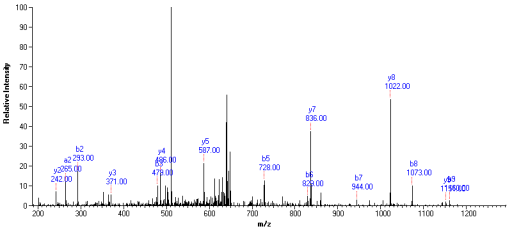

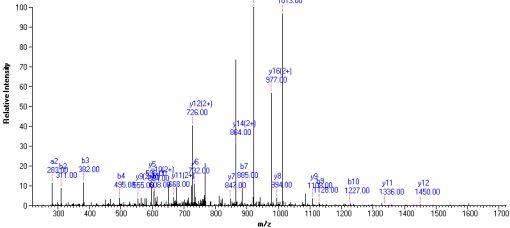

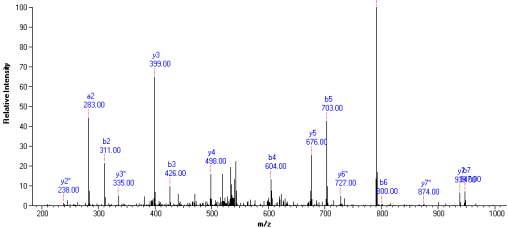

Peptide: \_YFQGK(ac)AVVESIQR\_Charge:2+\_m/z: 792.93\_MassError:0.26074111ppm\_RetentionTime:31.206min\_MascotScore:72.79

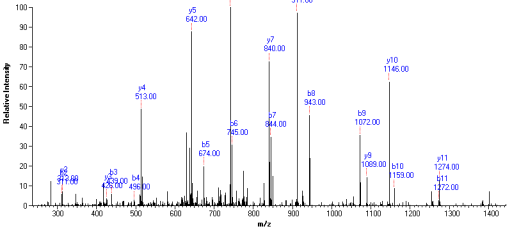

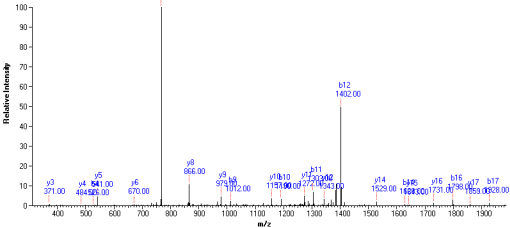

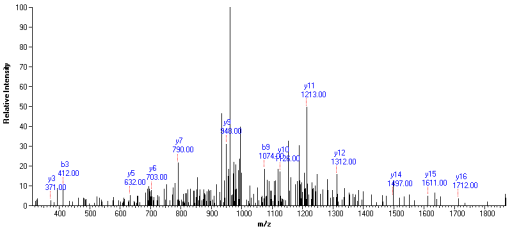

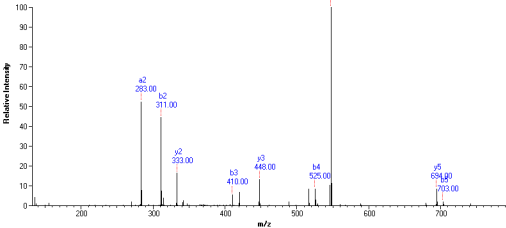

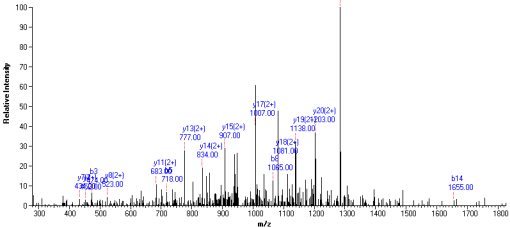



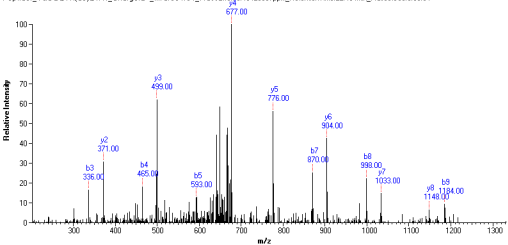

Peptide: \_YGDK(ac)VSALR\_Charge: 2+\_m/z: 534.79\_MassError: 1.1427289ppm\_RetentionTime: 18.23min\_MascotScore: 58.73

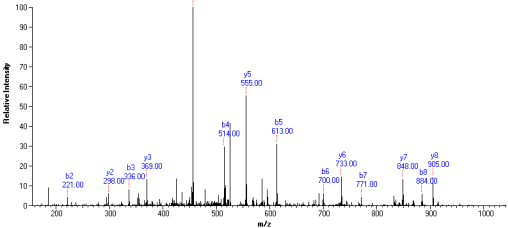

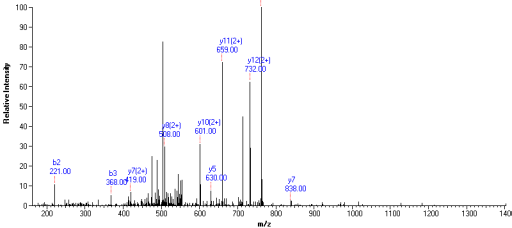

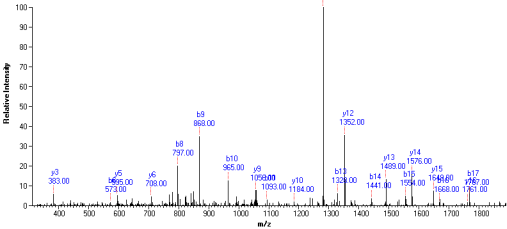

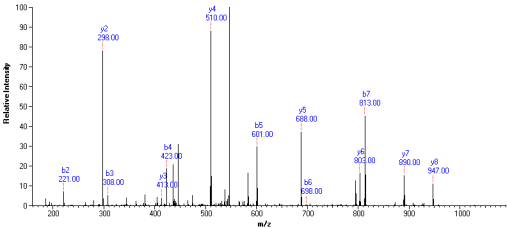

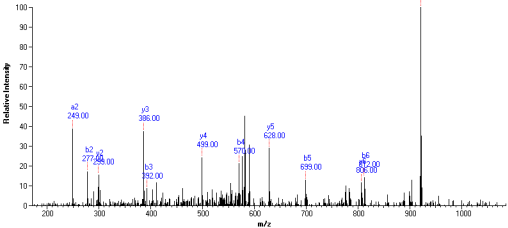

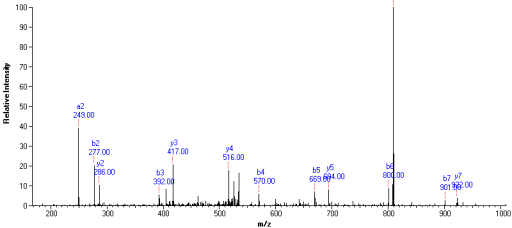

Peptide: \_YIELPDAYK(ac)SVIEALK(y) Charge: 2+ m/z: 955.53\_MassError: 2.6805953ppm\_RetentionTime: 50.566min\_MascotScore: 81.53

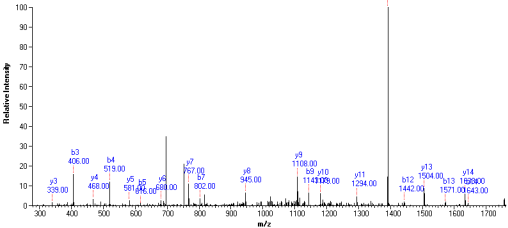



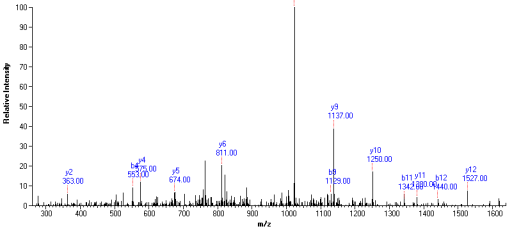

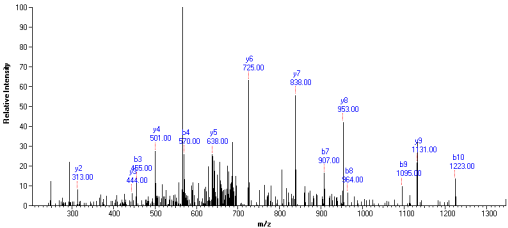

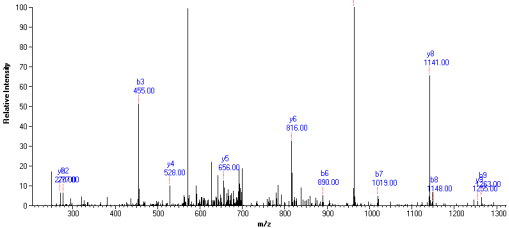

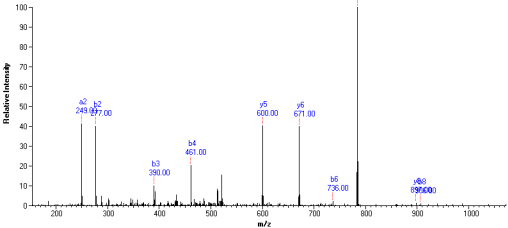

Relative Intensity

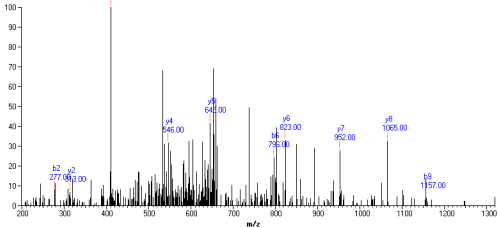

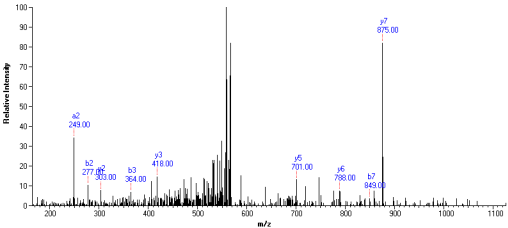

Peptide: \_YK(ac)AEYVILAGDHIYK (y)\_Charge: 2+\_m/z: 970.53\_MassError: 0.85024785ppm\_RetentionTime: 37.601min\_MascotScore: 38.27

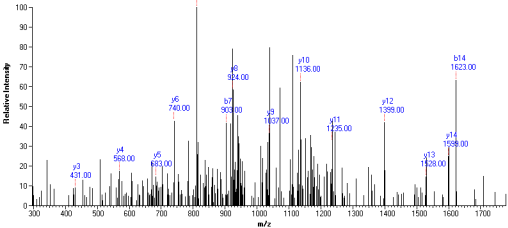

Peptide: \_YK(ac)DLIGK(Iy)\_ Charge: 2+ \_m/z: 447.77 \_MassError: 2.3839332ppm \_RetentionTime: 18.43min \_MascotScore: 41.74

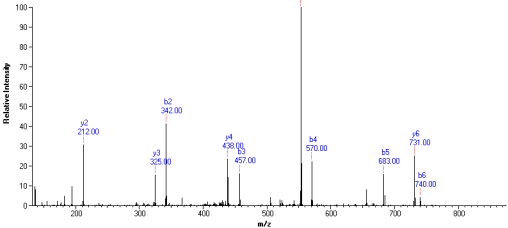



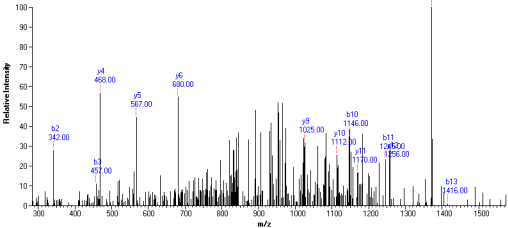

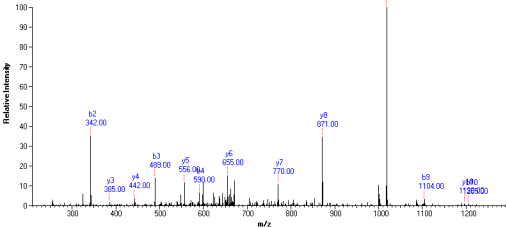

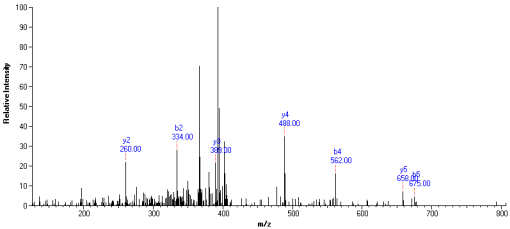

Peptide: \_YLAEEHFK(ac)APVYVYK(I)Y\_Charge:2+\_m/z:844.47\_MassError:15742661ppm\_RetentionTime:22.14min\_MascotScore:54.57

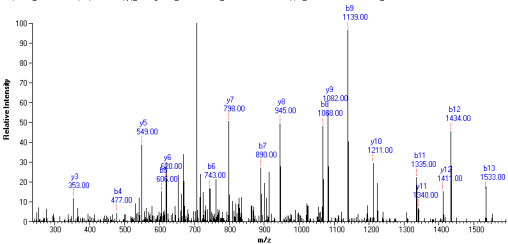

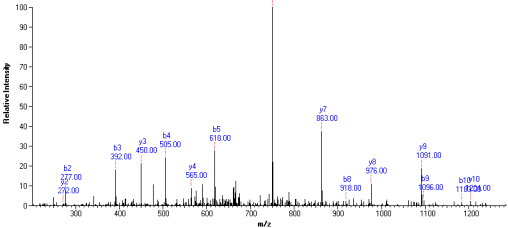

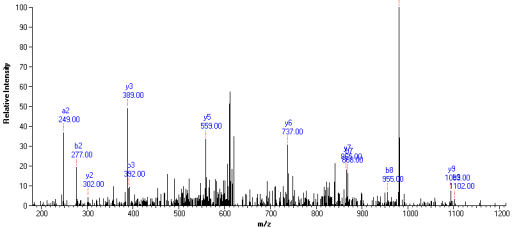

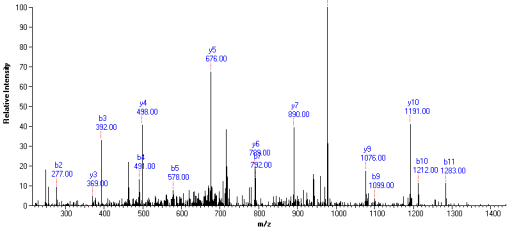

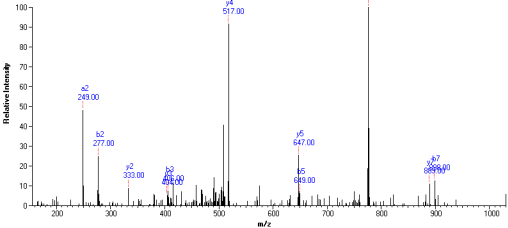



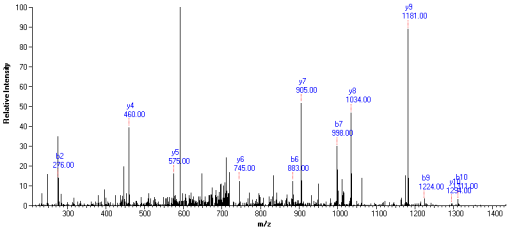

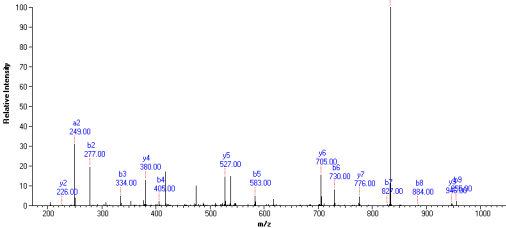

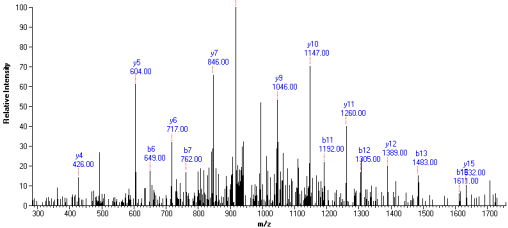

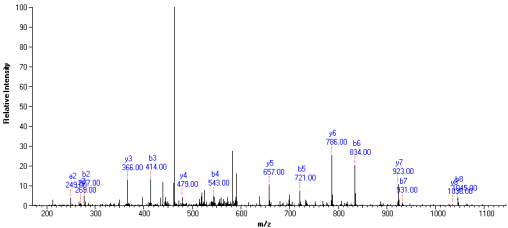

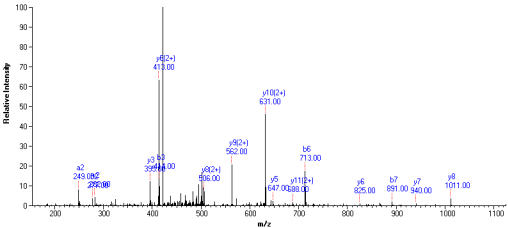

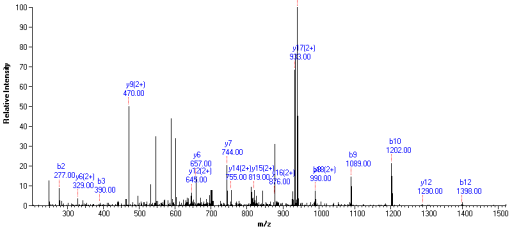

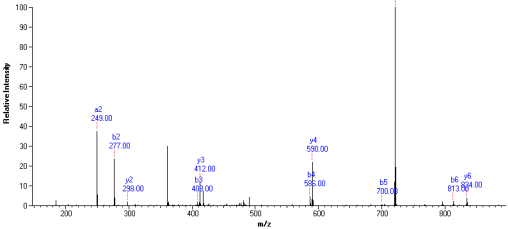

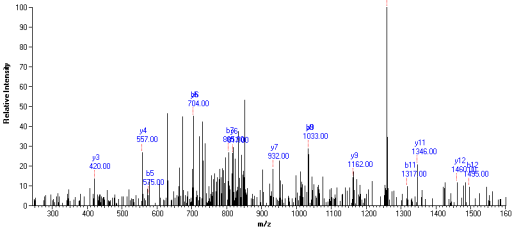



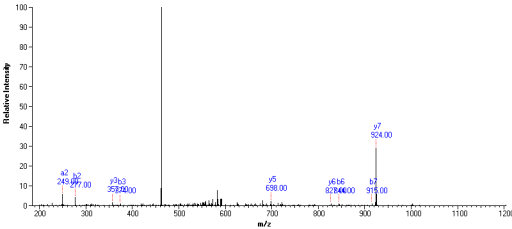

Peptide: \_YLQAIEK(ac)R\_Charge:2+\_m/z: 540.81\_MassError:1.8844224ppm\_RetentionTime:15.013min\_MascotScore:32.71

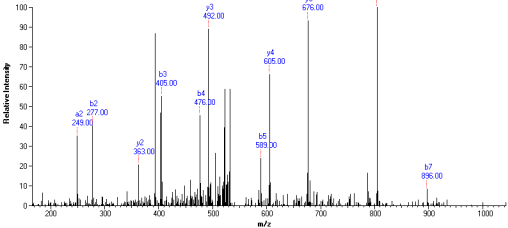

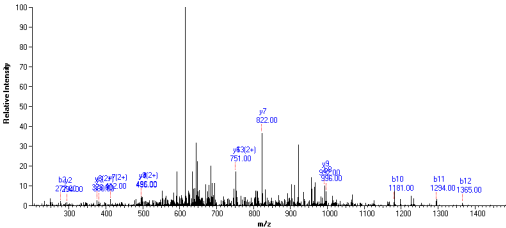

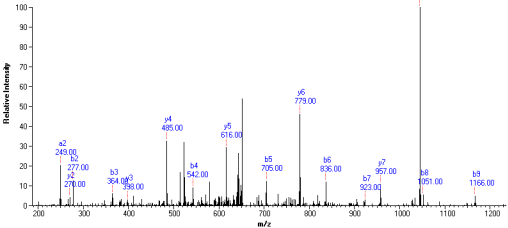

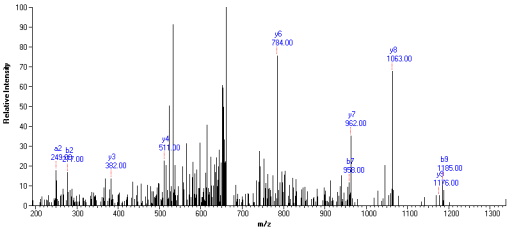

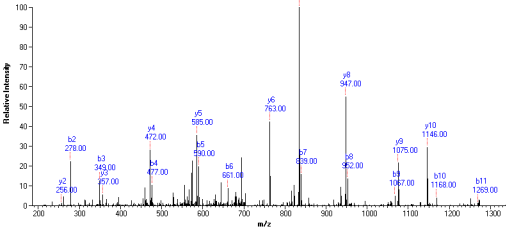

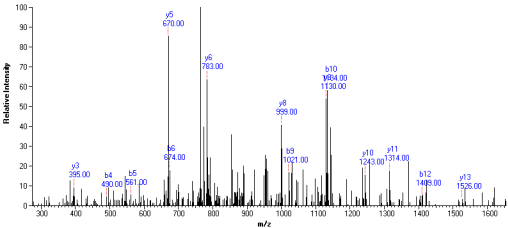

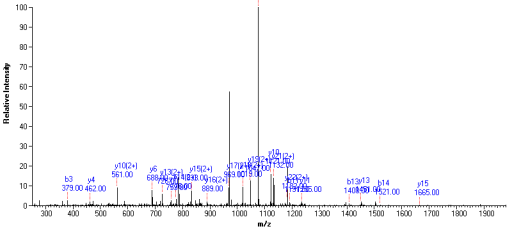



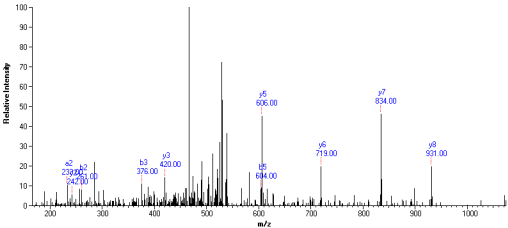

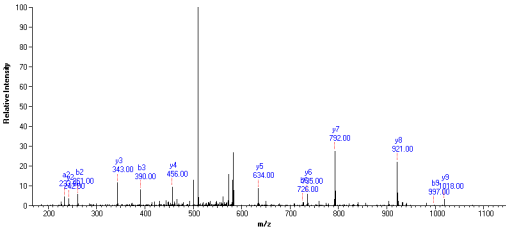

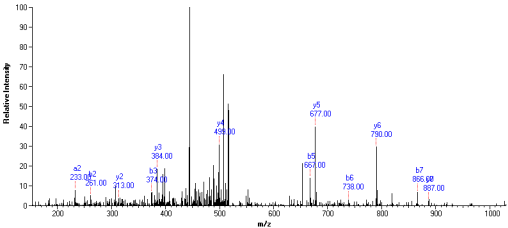

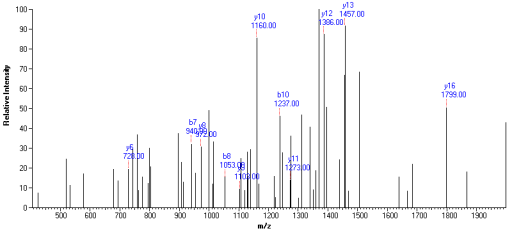

Peptide: \_YSANNYYVK(ac)WK(Iy)\_Charge:2+\_m/z:665.84\_MassError:0.0092554625ppm\_RetentionTime:22.784min\_MascotScore:80.45

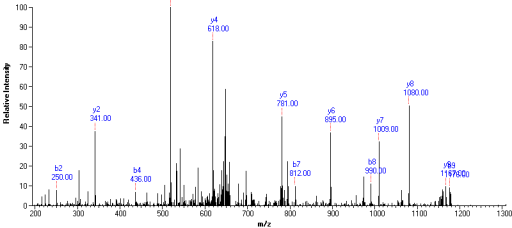

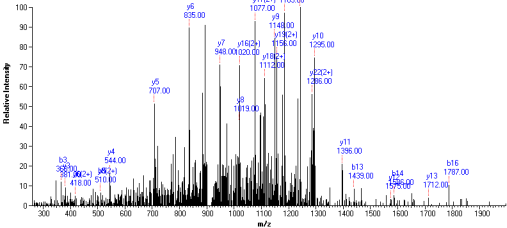

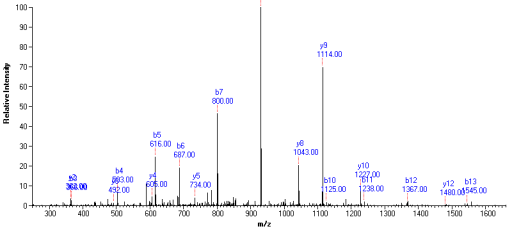

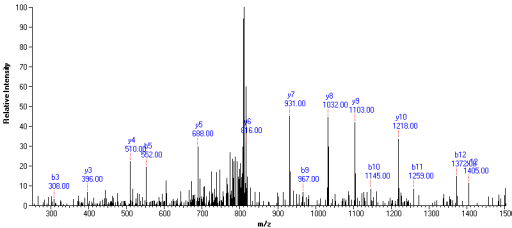



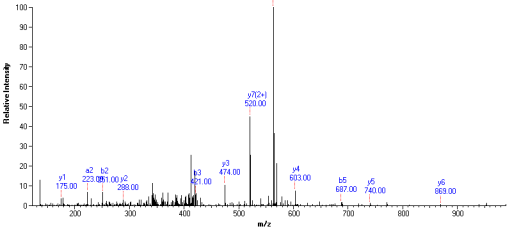

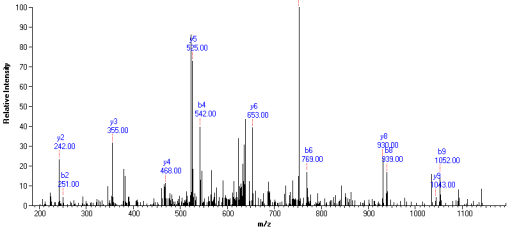

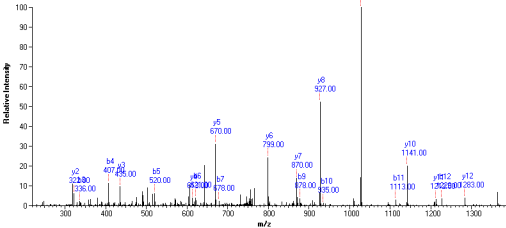

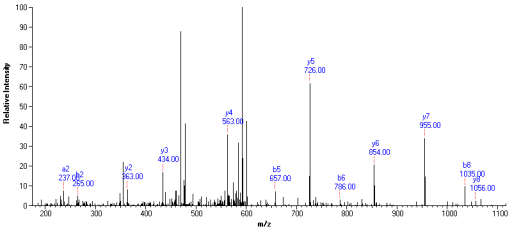

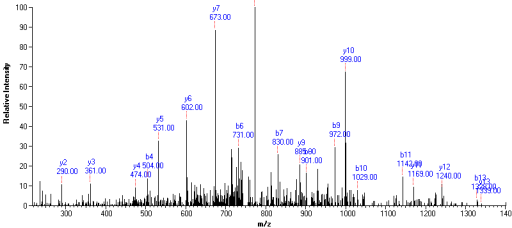

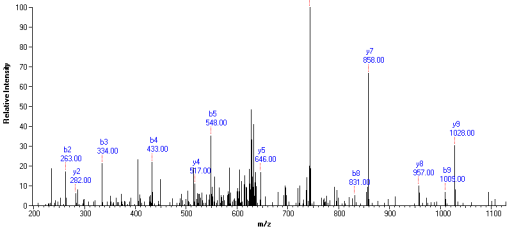

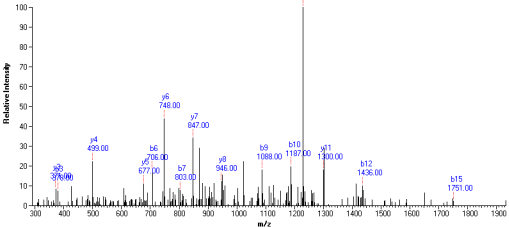

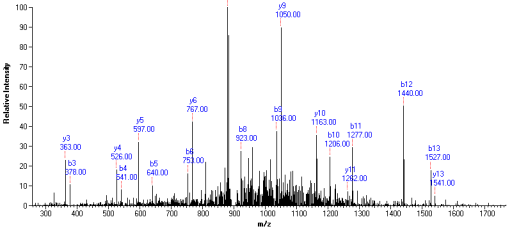



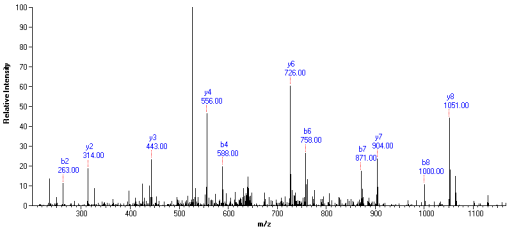

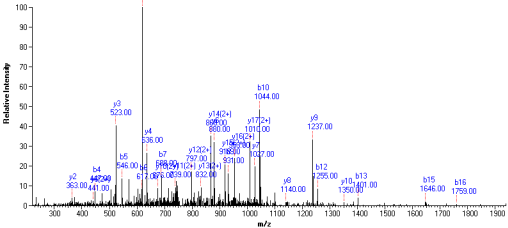

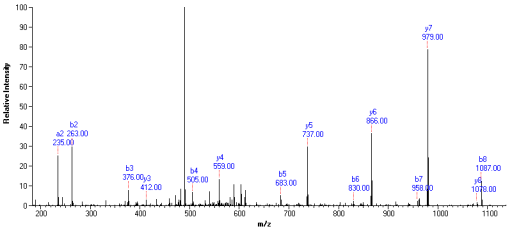

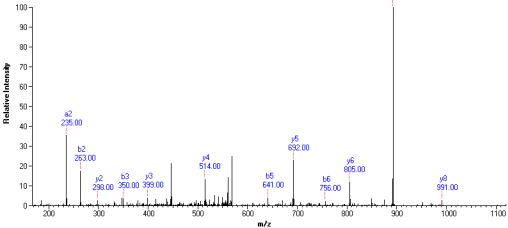

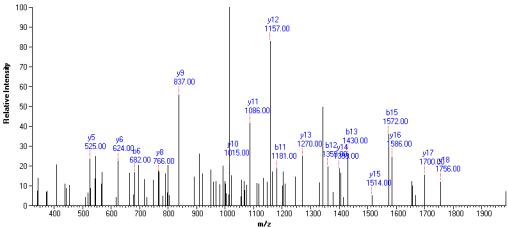

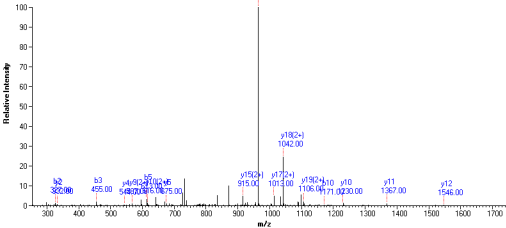

Peptide: YYQIVK(ac)CFR\_Charge: 2+\_m/z: 659.83\_MassError: -0.096037277ppm\_RetentionTime: 30.718min\_MascotScore: 31.21

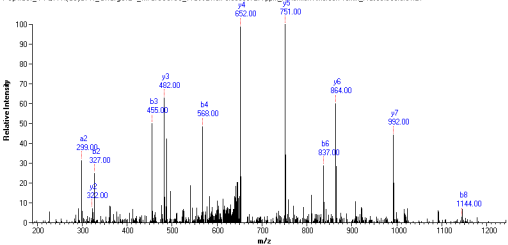

Supplement: supp_M113.031567_mcp.M113.031567-2.pdf [file supp_M113.031567_mcp.M113.031567-2.pdf]
