# Supplementary material
Source: PubMed Central journal article supplement (PMC3861704)

## SUPPLEMENTAL INFORMATION

### Identification of lysine succinylation substrates and the succinylation regulatory enzyme **CobB** in *E. coli*

Gozde Colak<sup>1+</sup>, Zhongyu Xie<sup>1+</sup>, Anita Y. Zhu<sup>3+</sup>, Lunzhi Dai<sup>1</sup>, Zhike Lu<sup>1</sup>, Yi Zhang<sup>2</sup>, Xuelian Wan<sup>2</sup>, Yue Chen<sup>1</sup>, Yoon H. Cha<sup>3</sup>, Hening Lin<sup>3\*</sup>, Yingming Zhao<sup>1,2\*</sup> and Minjia Tan<sup>2\*</sup>

<sup>1</sup>Ben May Department of Cancer Research, University of Chicago, Chicago, IL, 60637, USA

<sup>2</sup>State Key Laboratory of Drug Research, Shanghai Institute of Materia Medica, Chinese Academy of Sciences, Shanghai, 201203, P.R. China

<sup>3</sup> Department of Chemistry and Chemical Biology, Cornell University, Ithaca, NY, 14853, USA

<sup>+</sup>Equal contribution

\*Correspondence:

[mjtan@simmm.ac.cn](mailto:mjtan@simmm.ac.cn), ph: +86-21-50800172, fax: +86-21-50800172

[yingming.zhao@uchicago.edu](mailto:yingming.zhao@uchicago.edu), ph: 773-834-1561, fax: 773-702-3701

[h1379@cornell.edu](mailto:h1379@cornell.edu), ph: 607-255-4650, fax: 607-255-1903

**Running title:** Lysine succinylome and its regulatory enzyme in *E. coli*.

## SUPPLEMENTAL MATERIALS AND METHODS

*Estimation of absolute stoichiometry of lysine succinylation and acetylation sites*— We modified a previously reported algorithm (37) and used it to calculate absolute stoichiometries of the Ksucc (or Kac) peptides, either in Light or Heavy media. This calculation was based on the quantification data (intensity of MS signals) for the Ksucc (or Kac) peptides, the corresponding protein, and the corresponding unmodified peptide, with the assumption that only one type of PTM occurs at a given site (stoichiometry calculated using this method is approximately accurate, even if a second type of PTM in the peptide is present and has low stoichiometry). The completely digested fragment of the peptide sequence containing the site of Ksucc (or Kac) modification was selected as the unmodified peptide. This peptide contained no other modifications. Quantification ratios of Ksucc or Kac peptides (x) to corresponding unmodified peptides (y) and proteins (z) were used to calculate the absolute stoichiometry using the previously reported algorithm (37). If the peptide contains no other PTM and tryptic digestion is complete, this method provides a good estimate of stoichiometry for a modified peptide.

## SUPPLEMENTAL FIGURE LEGENDS

**Supplemental Fig. S1. The SILAC distribution of proteins identified with more than 2 quantifiable Ksucc sites.** The x axis shows individual proteins with more than 2 quantifiable Ksucc sites. The yellow line (left y axis) shows the range of Ksucc sites SILAC ratios (H/L) in each individual protein. The blue line (right y axis) shows SILAC ratio fold of changes among the Ksucc sites in each individual protein (the maximum SILAC ratio (H/L) divided by the minimum SILAC ratio (H/L) ).

**Supplemental Fig. S2. Illustrations of the top ten enriched metabolic pathways from the KEGG database.** Each individual figure is drawn by using DAVID software. Below the pathway map, all the enzymes that participate in each pathway are listed with weblinks that provide information. Identified succinylated proteins are listed in red (presented with DAVID gene names). In addition, the detailed explanation of KEGG Pathway Maps in the figure can be obtained from [http://www.genome.jp/kegg/document/help\\_pathway.html](http://www.genome.jp/kegg/document/help_pathway.html). **A.** Ribosomal RNAs and ribosomal proteins. **B.** Purine Metabolism. **C.** Aminoacyl-tRNA biosynthesis. **D.** Glycolysis and gluconeogenesis. **E.** Pyrimidine metabolism. **F.** Pyruvate metabolism. **G.** Pentose phosphate pathway. **H.** Citrate cycle (TCA cycle). **I.** Glutathione metabolism. **J.** Fatty acid biosynthesis.

**Supplemental Fig. S3.** The complete Ksucc interaction network was obtained from the STRING 9.05 database with confidence score  $\geq 0.7$ , and visualized in Cytoscape. The resulting interactome had 403 nodes and 5,624 edges. The top 7 highly interconnected clusters identified by MCODE are shown in different colors (see also Fig. 5 for detail).

**Supplemental Fig. S4. Profiling of *E. coli* lysine acetylome (related to Fig. 6).** **A.** The total number of lysine-acetylated sites per protein. **B.** The sequence motif surrounding the acetylated lysine residue generated by iceLogo software.

**Supplemental Fig. S5. Distribution of the SILAC ratios of Kac sites.** **A.** The peptide intensities (y-axis, summed precursor-ion intensities of each peptide derived from MaxQuant) of the quantifiable Kac peptides in relation to their  $\log_2$  Ratio(H/L) (x-axis) between high- and no-glucose media. Blue:  $-6 \leq \log_2$  Ratio (H/L)  $\leq -1$ , green:  $-1 \leq \log_2$  Ratio(H/L)  $\leq 1$ , red:  $1 \leq \log_2$  Ratio(H/L)  $\leq 6$ . **B.** Distributions of the SILAC ratios of acetyllysine sites between high- and no-glucose media. The y-axis represents the number of Ksucc peptides in each category.

**Supplemental Fig. S6. The distributions of normalized SILAC ratios of Ksucc over Kac.** The normalized ratio of Ksucc ( $\log_2$  H/L) over Kac ( $\log_2$  H/L) of the peptides that contain both Ksucc and Kac modifications at the same lysine residue.

**Supplemental Fig. S7. The SILAC ratio distribution of quantifiable *E. coli* proteins.** Histogram showing the distribution of the SILAC ratios of *E. coli* proteins in high-glucose (Heavy) over no-glucose medium (Light). The y-axis represents the number of proteins in each category.

## **SUPPLEMENTAL TABLE LEGENDS**

**Supplemental Table S1. List of identified Ksucc peptides.** **A.** All identified Ksucc peptides. **B.** Ksucc peptides identified only in cells grown in Heavy (high-glucose) medium. **C.** Ksucc peptides identified only in cells grown in Light (no-glucose) medium. **D.** Quantifiable Ksucc peptides. **E.** Ksucc sites with absolute stoichiometries in Light (no-glucose) medium and Heavy (high-glucose) medium.

**Supplemental Table S2. KEGG pathway enrichment analysis of lysine-succinylated proteins.**

**Supplemental Table S3. Gene Ontology (GO) analysis of lysine-succinylated proteins.** **A.** Succinylation-enriched biological processes (BP). **B.** Succinylation-enriched cellular compartments (CC). **C.** Succinylation-enriched molecular functions (MF).

**Supplemental Table S4. Enrichment analysis for Pfam domains of lysine-succinylated proteins.**

**Supplemental Table S5. Protein interaction networks of succinylated proteins using the STRING database by MCODE.** The top 14 MCODE networks are listed.

**Supplemental Table S6. List of identified Kac peptides.** **A.** All identified Kac peptides. **B.** Kac peptides identified only in cells grown in Heavy (high-glucose) medium. **C.** Kac peptides identified only in cells grown in Light (no-glucose) medium. **D.** The list of quantifiable Kac peptides. **E.** The list of Kac peptides and their calculated stoichiometries in Light (no-glucose) medium and Heavy (high-glucose) medium.

**Supplemental Table S7. List of protein quantification results.**

**Supplemental Table S8. List of sites quantifiable for both Kac and Ksucc.** **Column A:** Normalized Kac SILAC ratio (H/L). **Column F:** Normalized Ksucc SILAC ratio (H/L) **Column**

**J:** The ratios of the normalized  $K_{succ}$  (H/L) divided by the normalized  $K_{ac}$  (H/L) in the same peptide sequence bearing either an acetyllysine or a succinyllysine residue.

# Supplemental Figure S1

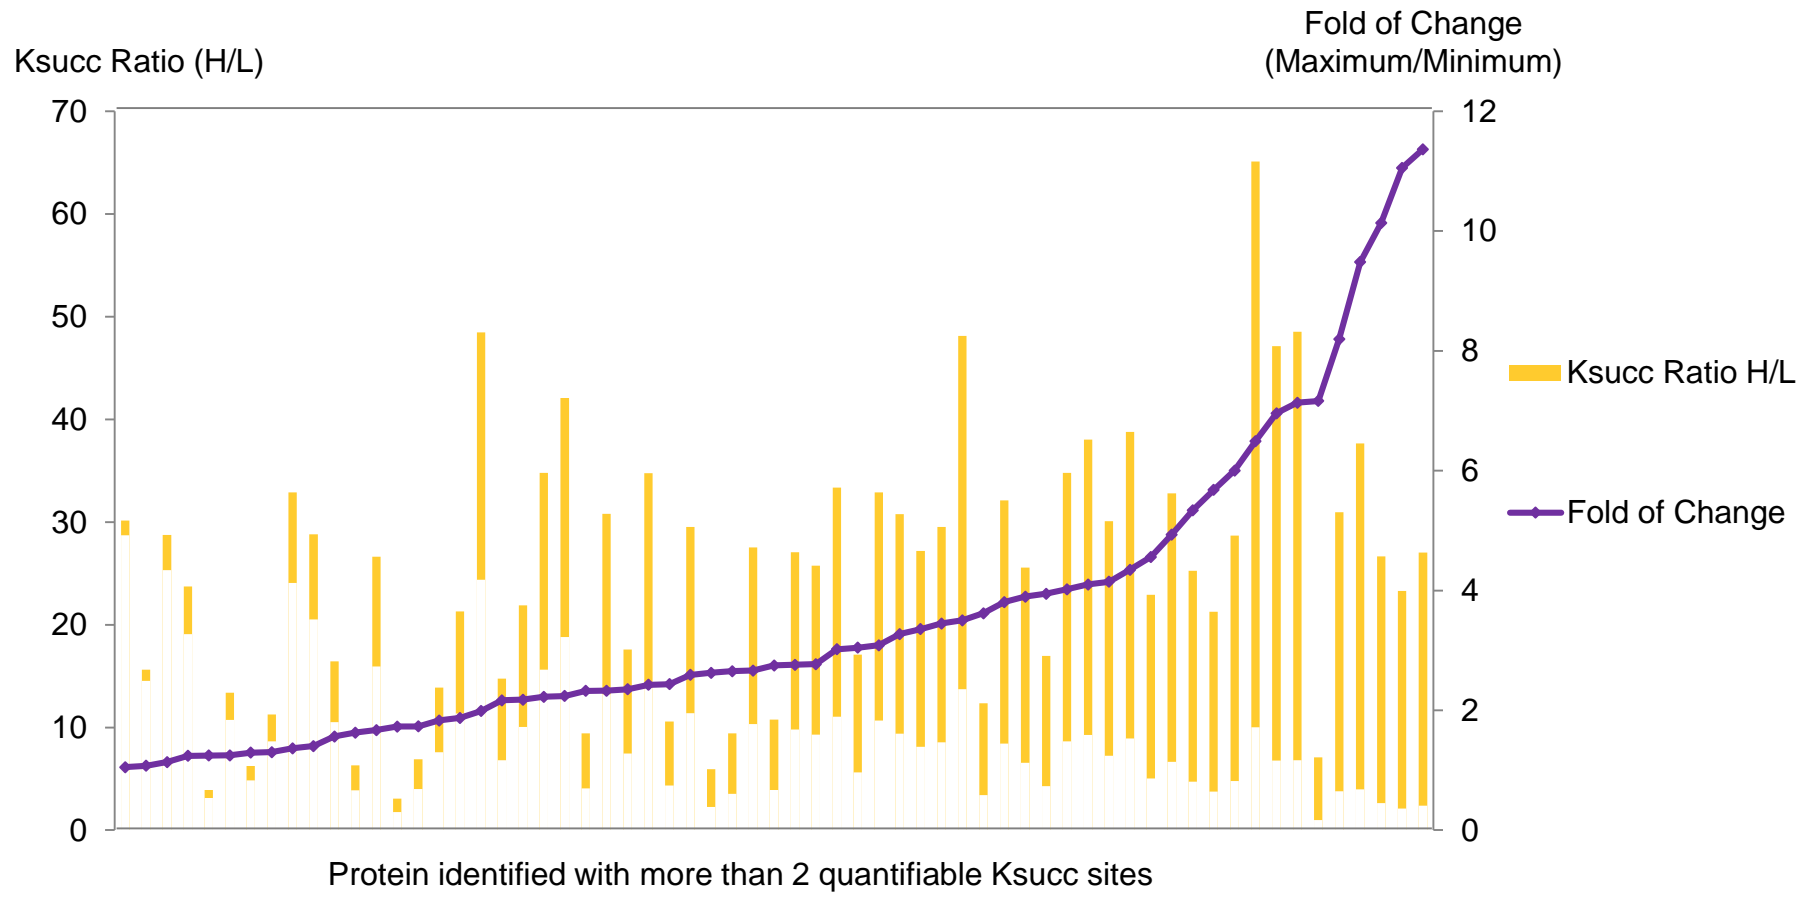

# Supplemental Figure S2 A

Pathway: Ribosome

Pathway information generated by [KEGG](#).

Stop Blinking

Help

## RIBOSOME

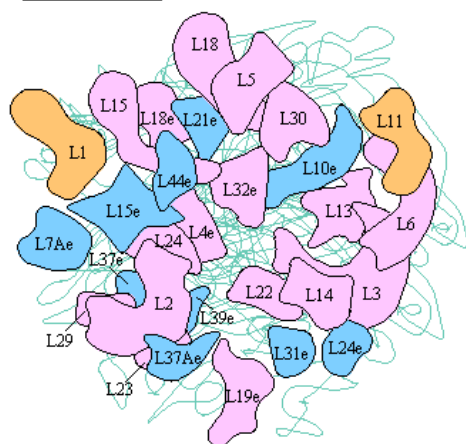

Large subunit

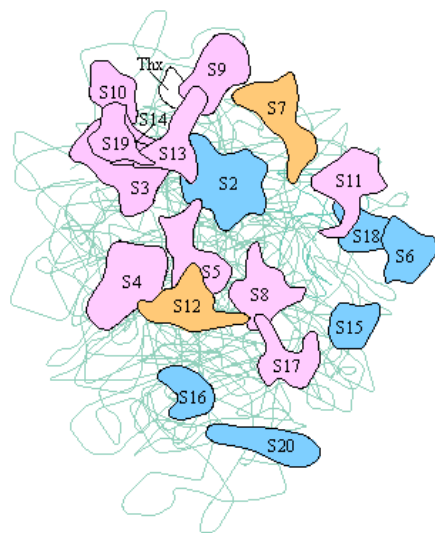

Small subunit

03010 7/29/13  
(c) Kanehisa Laboratories

## Ribosomal RNAs

|     |    |      |     |
|-----|----|------|-----|
| 23S | 5S |      | 16S |
| 25S | 5S | 5.8S | 18S |

## Ribosomal proteins

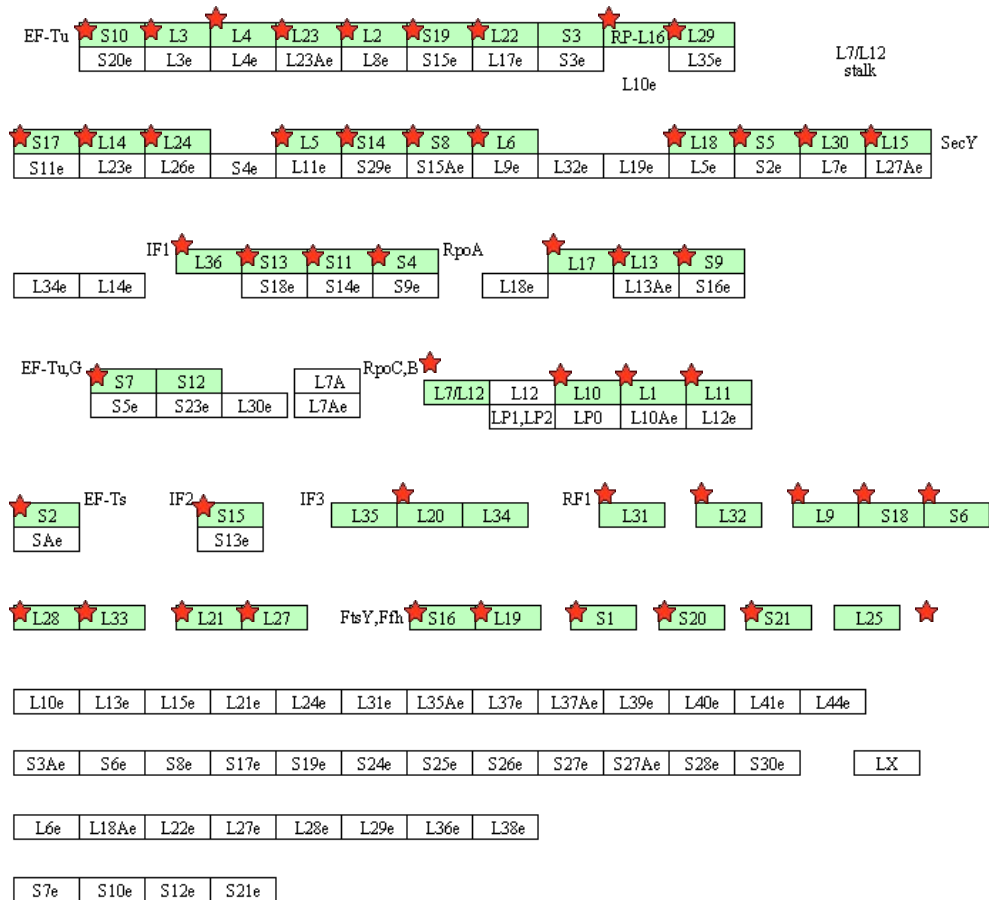

List genes are shown in red

| DAVID Gene Name                                                  |
|------------------------------------------------------------------|
| <a href="#">30S ribosomal protein S1</a>                         |
| <a href="#">30S ribosomal protein S10</a>                        |
| <a href="#">30S ribosomal protein S11</a>                        |
| <a href="#">30S ribosomal protein S13: 30S ribosomal protein</a> |
| <a href="#">30S ribosomal protein S14</a>                        |
| <a href="#">30S ribosomal protein S15</a>                        |
| <a href="#">30S ribosomal protein S16</a>                        |
| <a href="#">30S ribosomal protein S17</a>                        |
| <a href="#">30S ribosomal protein S18</a>                        |
| <a href="#">30S ribosomal protein S19</a>                        |
| <a href="#">30S ribosomal protein S2</a>                         |
| <a href="#">30S ribosomal protein S20</a>                        |
| <a href="#">30S ribosomal protein S21</a>                        |
| <a href="#">30S ribosomal protein S4</a>                         |
| <a href="#">30S ribosomal protein S5</a>                         |
| <a href="#">30S ribosomal protein S6</a>                         |
| <a href="#">30S ribosomal protein S7</a>                         |
| <a href="#">30S ribosomal protein S8</a>                         |
| <a href="#">30S ribosomal protein S9</a>                         |
| <a href="#">50S ribosomal protein L1</a>                         |
| <a href="#">50S ribosomal protein L10</a>                        |
| <a href="#">50S ribosomal protein L11</a>                        |
| <a href="#">50S ribosomal protein L13</a>                        |
| <a href="#">50S ribosomal protein L14</a>                        |
| <a href="#">50S ribosomal protein L15</a>                        |
| <a href="#">50S ribosomal protein L16</a>                        |



|                                                                                                                                                     |
|-----------------------------------------------------------------------------------------------------------------------------------------------------|
| <a href="#">50S ribosomal protein L17</a>                                                                                                           |
| <a href="#">50S ribosomal protein L18</a>                                                                                                           |
| <a href="#">50S ribosomal protein L19</a>                                                                                                           |
| <a href="#">50S ribosomal protein L2</a>                                                                                                            |
| <a href="#">50S ribosomal protein L20</a>                                                                                                           |
| <a href="#">50S ribosomal protein L21</a>                                                                                                           |
| <a href="#">50S ribosomal protein L22</a>                                                                                                           |
| <a href="#">50S ribosomal protein L23</a>                                                                                                           |
| <a href="#">50S ribosomal protein L24</a>                                                                                                           |
| <a href="#">50S ribosomal protein L25</a>                                                                                                           |
| <a href="#">50S ribosomal protein L27</a>                                                                                                           |
| <a href="#">50S ribosomal protein L28</a>                                                                                                           |
| <a href="#">50S ribosomal protein L29</a>                                                                                                           |
| <a href="#">50S ribosomal protein L3</a>                                                                                                            |
| <a href="#">50S ribosomal protein L30</a>                                                                                                           |
| <a href="#">50S ribosomal protein L31 type B 2: 50S ribosomal protein L31 type B 1: 50S ribosomal protein L31 type B: 50S ribosomal protein L31</a> |
| <a href="#">50S ribosomal protein L31</a>                                                                                                           |
| <a href="#">50S ribosomal protein L32</a>                                                                                                           |
| <a href="#">50S ribosomal protein L33</a>                                                                                                           |
| <a href="#">50S ribosomal protein L34</a>                                                                                                           |
| <a href="#">50S ribosomal protein L35</a>                                                                                                           |
| <a href="#">50S ribosomal protein L36 2: 50S ribosomal protein L36: 50S ribosomal protein L36 1</a>                                                 |
| <a href="#">50S ribosomal protein L4</a>                                                                                                            |
| <a href="#">50S ribosomal protein L5</a>                                                                                                            |
| <a href="#">50S ribosomal protein L6</a>                                                                                                            |
| <a href="#">50S ribosomal protein L7/L12</a>                                                                                                        |
| <a href="#">50S ribosomal protein L9</a>                                                                                                            |
| <a href="#">Stationary-phase-induced ribosome-associated protein</a>                                                                                |

# Supplemental Figure S2 B

Pathway: Purine metabolism

Pathway information generated by KEGG.

Stop Blinking

Help

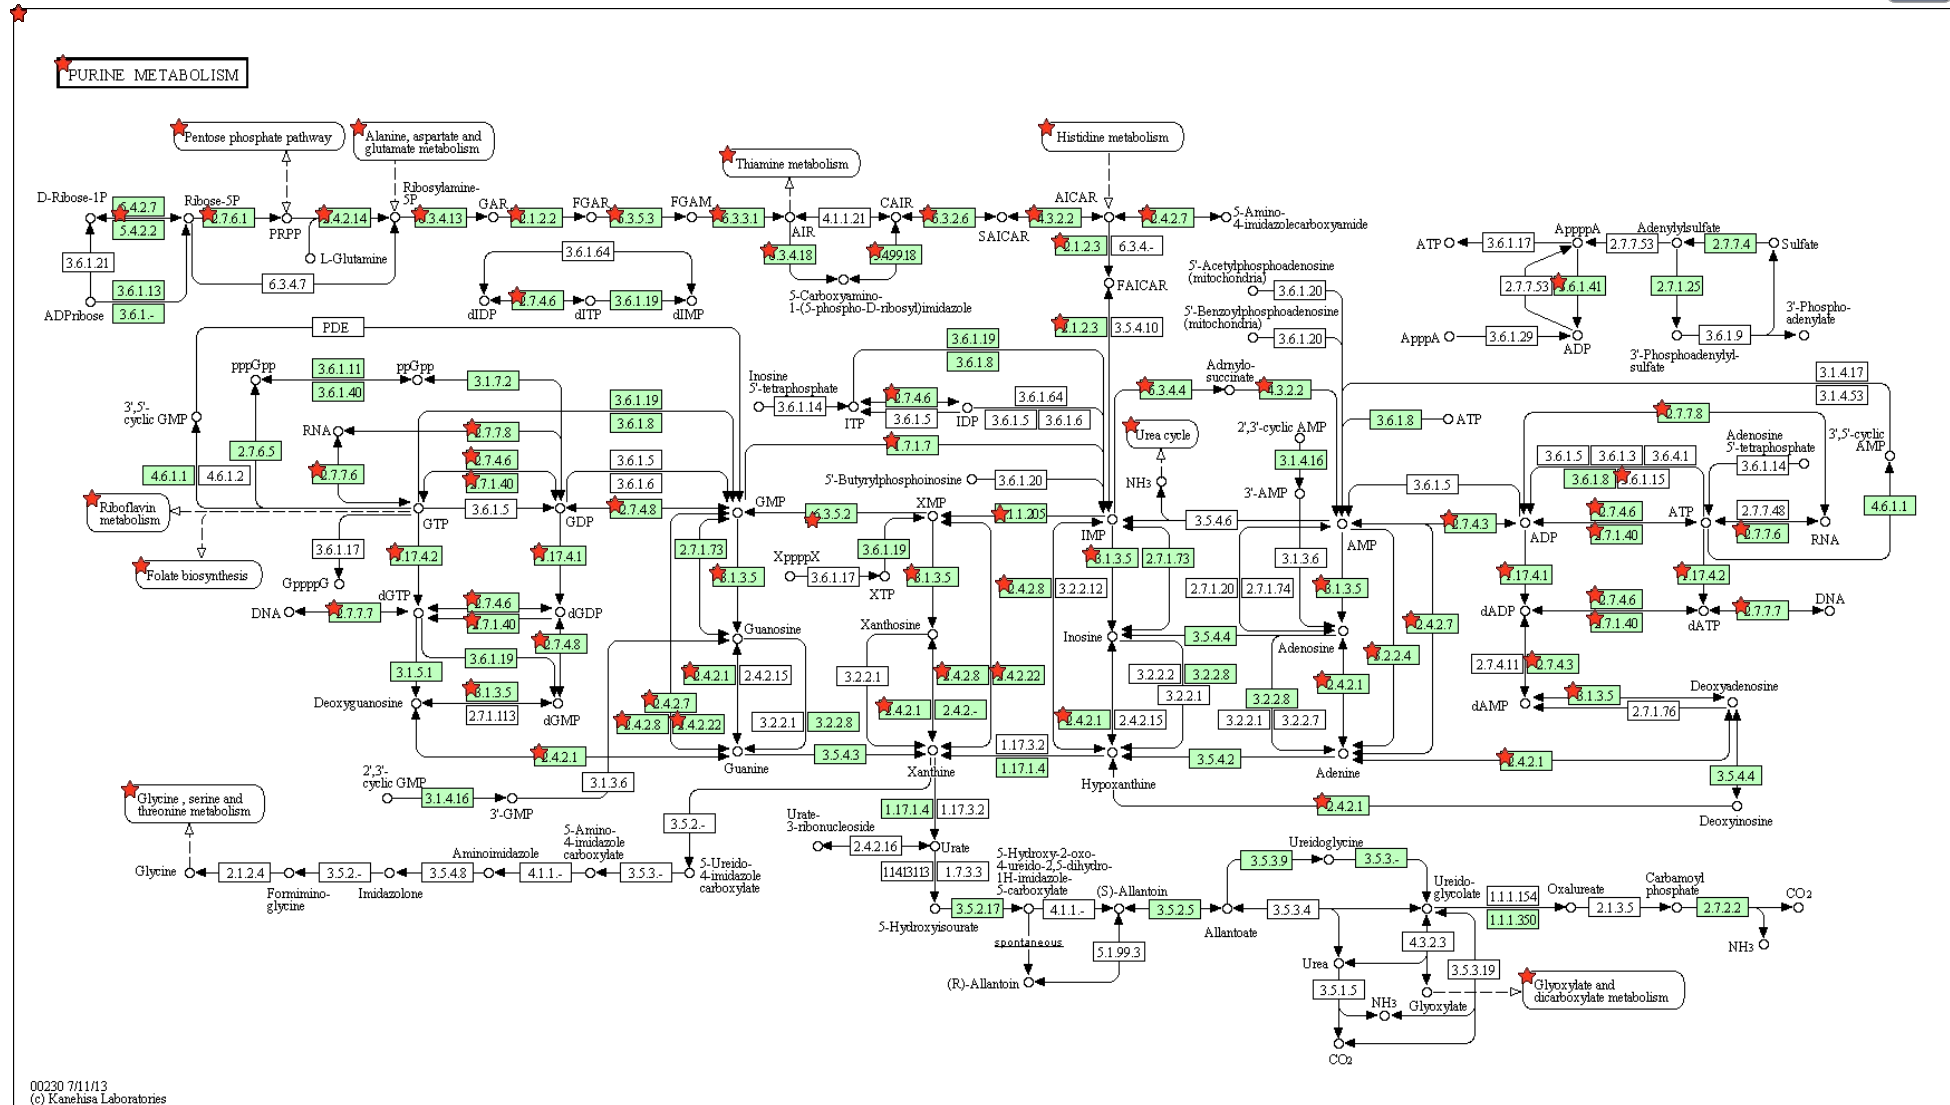

List genes are shown in red

| DAVID Gene Name                                                                                                   |
|-------------------------------------------------------------------------------------------------------------------|
| <a href="#">5-nucleotidase yjjG</a>                                                                               |
| <a href="#">ADP compounds hydrolase nudE</a>                                                                      |
| <a href="#">ADP-ribose pyrophosphatase</a>                                                                        |
| <a href="#">AMP nucleosidase</a>                                                                                  |
| <a href="#">Adenine deaminase</a>                                                                                 |
| <a href="#">Adenine phosphoribosyltransferase</a>                                                                 |
| <a href="#">Adenosine deaminase</a>                                                                               |
| <a href="#">Adenylyl cyclase</a>                                                                                  |
| <a href="#">Adenylyl kinase</a>                                                                                   |
| <a href="#">Adenylosuccinate lyase</a>                                                                            |
| <a href="#">Adenylosuccinate synthetase</a>                                                                       |
| <a href="#">Adenylyl-sulfate kinase</a>                                                                           |
| <a href="#">Allantoate amidohydrolase</a>                                                                         |
| <a href="#">Amidophosphoribosyltransferase</a>                                                                    |
| <a href="#">Anaerobic ribonucleoside-triphosphate reductase</a>                                                   |
| <a href="#">Bifunctional purine biosynthesis protein purH</a>                                                     |
| <a href="#">Bis(5'-nucleosyl)-tetraphosphatase, symmetrical: Bis(5'-nucleosyl)-tetraphosphatase [symmetrical]</a> |
| <a href="#">Carbamate kinase</a>                                                                                  |
| <a href="#">Carbamate kinase</a>                                                                                  |

|                                                                                                                                                                                                                                                                   |
|-------------------------------------------------------------------------------------------------------------------------------------------------------------------------------------------------------------------------------------------------------------------|
| <a href="#">Carbamate kinase-like protein yahl</a>                                                                                                                                                                                                                |
| <a href="#">Carbamate kinase-like protein yqeA</a>                                                                                                                                                                                                                |
| <a href="#">DNA polymerase I</a>                                                                                                                                                                                                                                  |
| <a href="#">DNA polymerase III subunit alpha</a>                                                                                                                                                                                                                  |
| <a href="#">DNA polymerase III subunit beta</a>                                                                                                                                                                                                                   |
| <a href="#">DNA polymerase III subunit chi</a>                                                                                                                                                                                                                    |
| <a href="#">DNA polymerase III subunit delta</a>                                                                                                                                                                                                                  |
| <a href="#">DNA polymerase III subunit delta'</a>                                                                                                                                                                                                                 |
| <a href="#">DNA polymerase III subunit epsilon</a>                                                                                                                                                                                                                |
| <a href="#">DNA polymerase III subunit psi</a>                                                                                                                                                                                                                    |
| <a href="#">DNA polymerase III subunit tau</a>                                                                                                                                                                                                                    |
| <a href="#">DNA polymerase III subunit theta</a>                                                                                                                                                                                                                  |
| <a href="#">DNA-directed RNA polymerase subunit alpha</a>                                                                                                                                                                                                         |
| <a href="#">DNA-directed RNA polymerase subunit beta</a>                                                                                                                                                                                                          |
| <a href="#">DNA-directed RNA polymerase subunit omega</a>                                                                                                                                                                                                         |
| <a href="#">DNA-directed RNA polymerase: DNA-directed RNA polymerase subunit beta'</a>                                                                                                                                                                            |
| <a href="#">Deoxyguanosinetriphosphate triphosphohydrolase</a>                                                                                                                                                                                                    |
| <a href="#">ECs5191: ECP_4467: ECSE_4519: EcSMS35_4692: ECUMN_4750: Z5824: EcoIC_3793: EGS88_4807: F2348C_4544: EC55989_4773: ECDH10B_4408: ECED1_5072: ECH74115_5730: ECIA11_4447: b4213: ECIA139_4685: UTI89_C4822: EcHS_A4467: APECO1_2173: EcE24377A_4783</a> |
| <a href="#">Exopolyphosphatase</a>                                                                                                                                                                                                                                |
| <a href="#">GMP reductase</a>                                                                                                                                                                                                                                     |
| <a href="#">GMP synthase [glutamine-hydrolyzing]</a>                                                                                                                                                                                                              |
| <a href="#">GTP pyrophosphokinase</a>                                                                                                                                                                                                                             |
| <a href="#">Guanosine-3',5'-bis(diphosphate) 3'-pyrophosphohydrolase</a>                                                                                                                                                                                          |
| <a href="#">Guanosine-5'-triphosphate 3'-diphosphate pyrophosphatase</a>                                                                                                                                                                                          |
| <a href="#">Guanylate kinase</a>                                                                                                                                                                                                                                  |
| <a href="#">Hypoxanthine phosphoribosyltransferase</a>                                                                                                                                                                                                            |
| <a href="#">Inosine-5'-monophosphate dehydrogenase</a>                                                                                                                                                                                                            |
| <a href="#">Inosine-guanosine kinase</a>                                                                                                                                                                                                                          |
| <a href="#">Multifunctional protein surF</a>                                                                                                                                                                                                                      |
| <a href="#">Nucleoside diphosphate kinase</a>                                                                                                                                                                                                                     |
| <a href="#">Nucleoside-triphosphatase: Nucleoside-triphosphatase rdgB</a>                                                                                                                                                                                         |
| <a href="#">Phosphopentomutase</a>                                                                                                                                                                                                                                |
| <a href="#">Phosphoribosylamine-glycine ligase</a>                                                                                                                                                                                                                |
| <a href="#">Phosphoribosylaminoimidazole carboxylase ATPase subunit</a>                                                                                                                                                                                           |
| <a href="#">Phosphoribosylaminoimidazole carboxylase catalytic subunit</a>                                                                                                                                                                                        |
| <a href="#">Phosphoribosylaminoimidazole-succinocarboxamide synthase</a>                                                                                                                                                                                          |
| <a href="#">Phosphoribosylformylglycinamide cyclo-ligase</a>                                                                                                                                                                                                      |
| <a href="#">Phosphoribosylformylglycinamide synthase</a>                                                                                                                                                                                                          |
| <a href="#">Phosphoribosylglycinamide formyltransferase 2</a>                                                                                                                                                                                                     |
| <a href="#">Phosphoribosylglycinamide formyltransferase</a>                                                                                                                                                                                                       |
| <a href="#">Polyribonucleotide nucleotidyltransferase</a>                                                                                                                                                                                                         |
| <a href="#">Protein mazG</a>                                                                                                                                                                                                                                      |
| <a href="#">Purine nucleoside phosphorylase deoD-type</a>                                                                                                                                                                                                         |
| <a href="#">Pyrimidine-specific ribonucleoside hydrolase rihB</a>                                                                                                                                                                                                 |
| <a href="#">Pyruvate kinase I: Pyruvate kinase</a>                                                                                                                                                                                                                |
| <a href="#">Pyruvate kinase II: Pyruvate kinase</a>                                                                                                                                                                                                               |
| <a href="#">Ribonucleoside-diphosphate reductase 1 subunit beta</a>                                                                                                                                                                                               |
| <a href="#">Ribonucleoside-diphosphate reductase 2 subunit beta</a>                                                                                                                                                                                               |
| <a href="#">Ribonucleoside-diphosphate reductase: Ribonucleoside-diphosphate reductase 1 subunit alpha</a>                                                                                                                                                        |
| <a href="#">Ribonucleoside-diphosphate reductase: Ribonucleoside-diphosphate reductase 2 subunit alpha</a>                                                                                                                                                        |
| <a href="#">Ribose-phosphate pyrophosphokinase</a>                                                                                                                                                                                                                |
| <a href="#">Sulfate adenyltransferase subunit 1</a>                                                                                                                                                                                                               |
| <a href="#">Sulfate adenyltransferase subunit 2</a>                                                                                                                                                                                                               |
| <a href="#">UPF0207 protein yfbR: 5'-nucleotidase yfbR</a>                                                                                                                                                                                                        |
| <a href="#">Ureidoglycolate dehydrogenase</a>                                                                                                                                                                                                                     |
| <a href="#">Xanthine phosphoribosyltransferase</a>                                                                                                                                                                                                                |
| <a href="#">Xanthosine phosphorylase</a>                                                                                                                                                                                                                          |

# Supplemental Figure S2 C

Pathway: Aminoacyl-tRNA biosynthesis

Pathway information generated by KEGG.

Stop Blinking

Help

## AMINOACYL-tRNA BIOSYNTHESIS

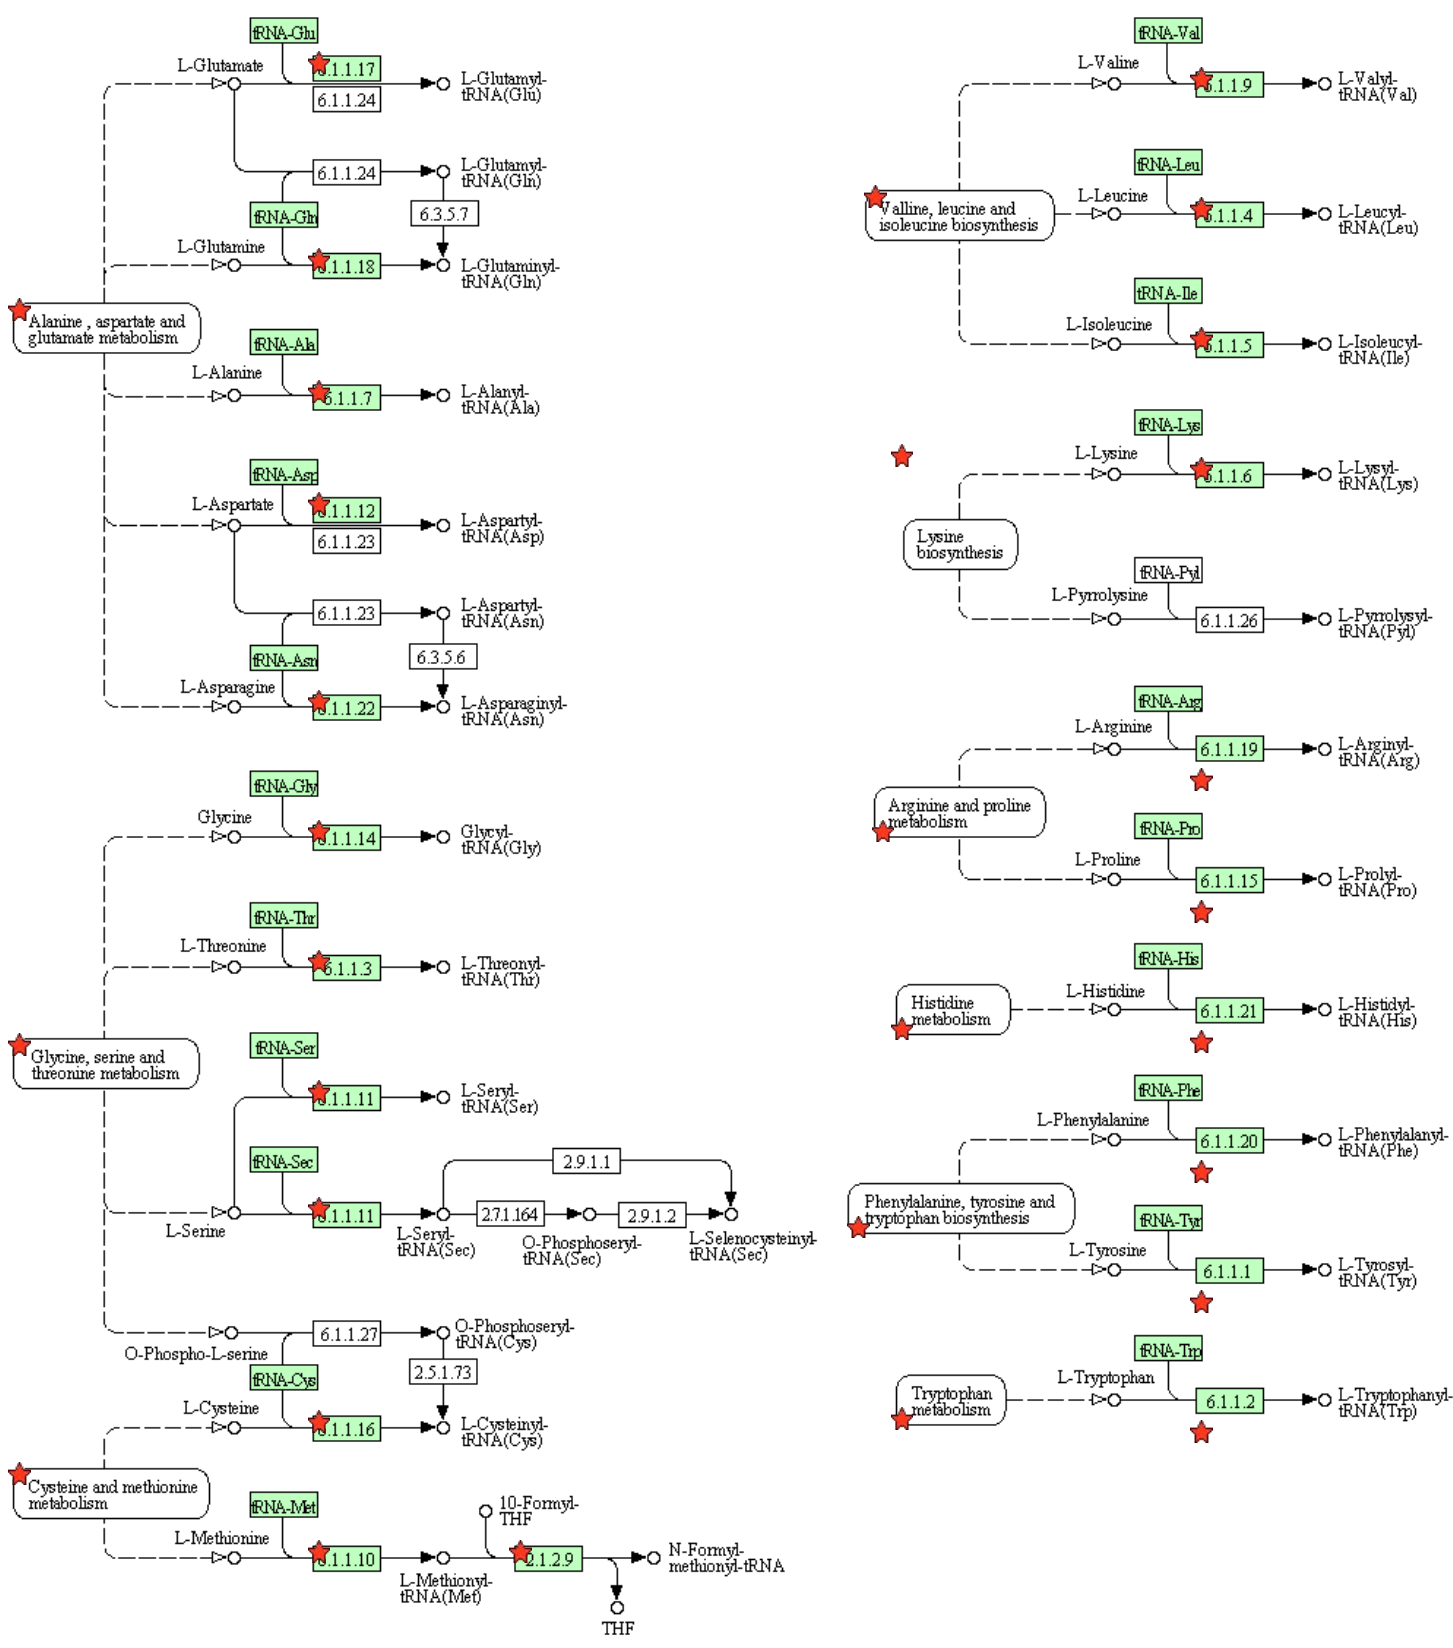

List genes are shown in red

| DAVID Gene Name                                                              |
|------------------------------------------------------------------------------|
| <a href="#">Alanyl-tRNA synthetase</a>                                       |
| <a href="#">Arginyl-tRNA synthetase</a>                                      |
| <a href="#">Asparaginyl-tRNA synthetase: Regulatory protein asnC</a>         |
| <a href="#">Aspartyl-tRNA synthetase</a>                                     |
| <a href="#">Cysteinyl-tRNA synthetase</a>                                    |
| <a href="#">Glutaminyl-tRNA synthetase</a>                                   |
| <a href="#">Glutamyl-tRNA synthetase</a>                                     |
| <a href="#">Glycyl-tRNA synthetase beta subunit</a>                          |
| <a href="#">Histidyl-tRNA synthetase</a>                                     |
| <a href="#">Isoleucyl-tRNA synthetase</a>                                    |
| <a href="#">Leucyl-tRNA synthetase</a>                                       |
| <a href="#">Lysyl-tRNA synthetase: Lysyl-tRNA synthetase, heat inducible</a> |
| <a href="#">Lysyl-tRNA synthetase: Lysyl-tRNA synthetase, heat inducible</a> |
| <a href="#">Methionyl-tRNA formyltransferase</a>                             |
| <a href="#">Methionyl-tRNA synthetase</a>                                    |
| <a href="#">Phenylalanyl-tRNA synthetase alpha chain</a>                     |
| <a href="#">Phenylalanyl-tRNA synthetase beta chain</a>                      |
| <a href="#">Prolyl-tRNA synthetase</a>                                       |
| <a href="#">Putative lysyl-tRNA synthetase</a>                               |
| <a href="#">Seryl-tRNA synthetase</a>                                        |
| <a href="#">Threonyl-tRNA synthetase</a>                                     |
| <a href="#">Tryptophanyl-tRNA synthetase</a>                                 |
| <a href="#">Tyrosyl-tRNA synthetase</a>                                      |
| <a href="#">Valyl-tRNA synthetase</a>                                        |

## GLYCOLYSIS / GLUCONEOGENESIS

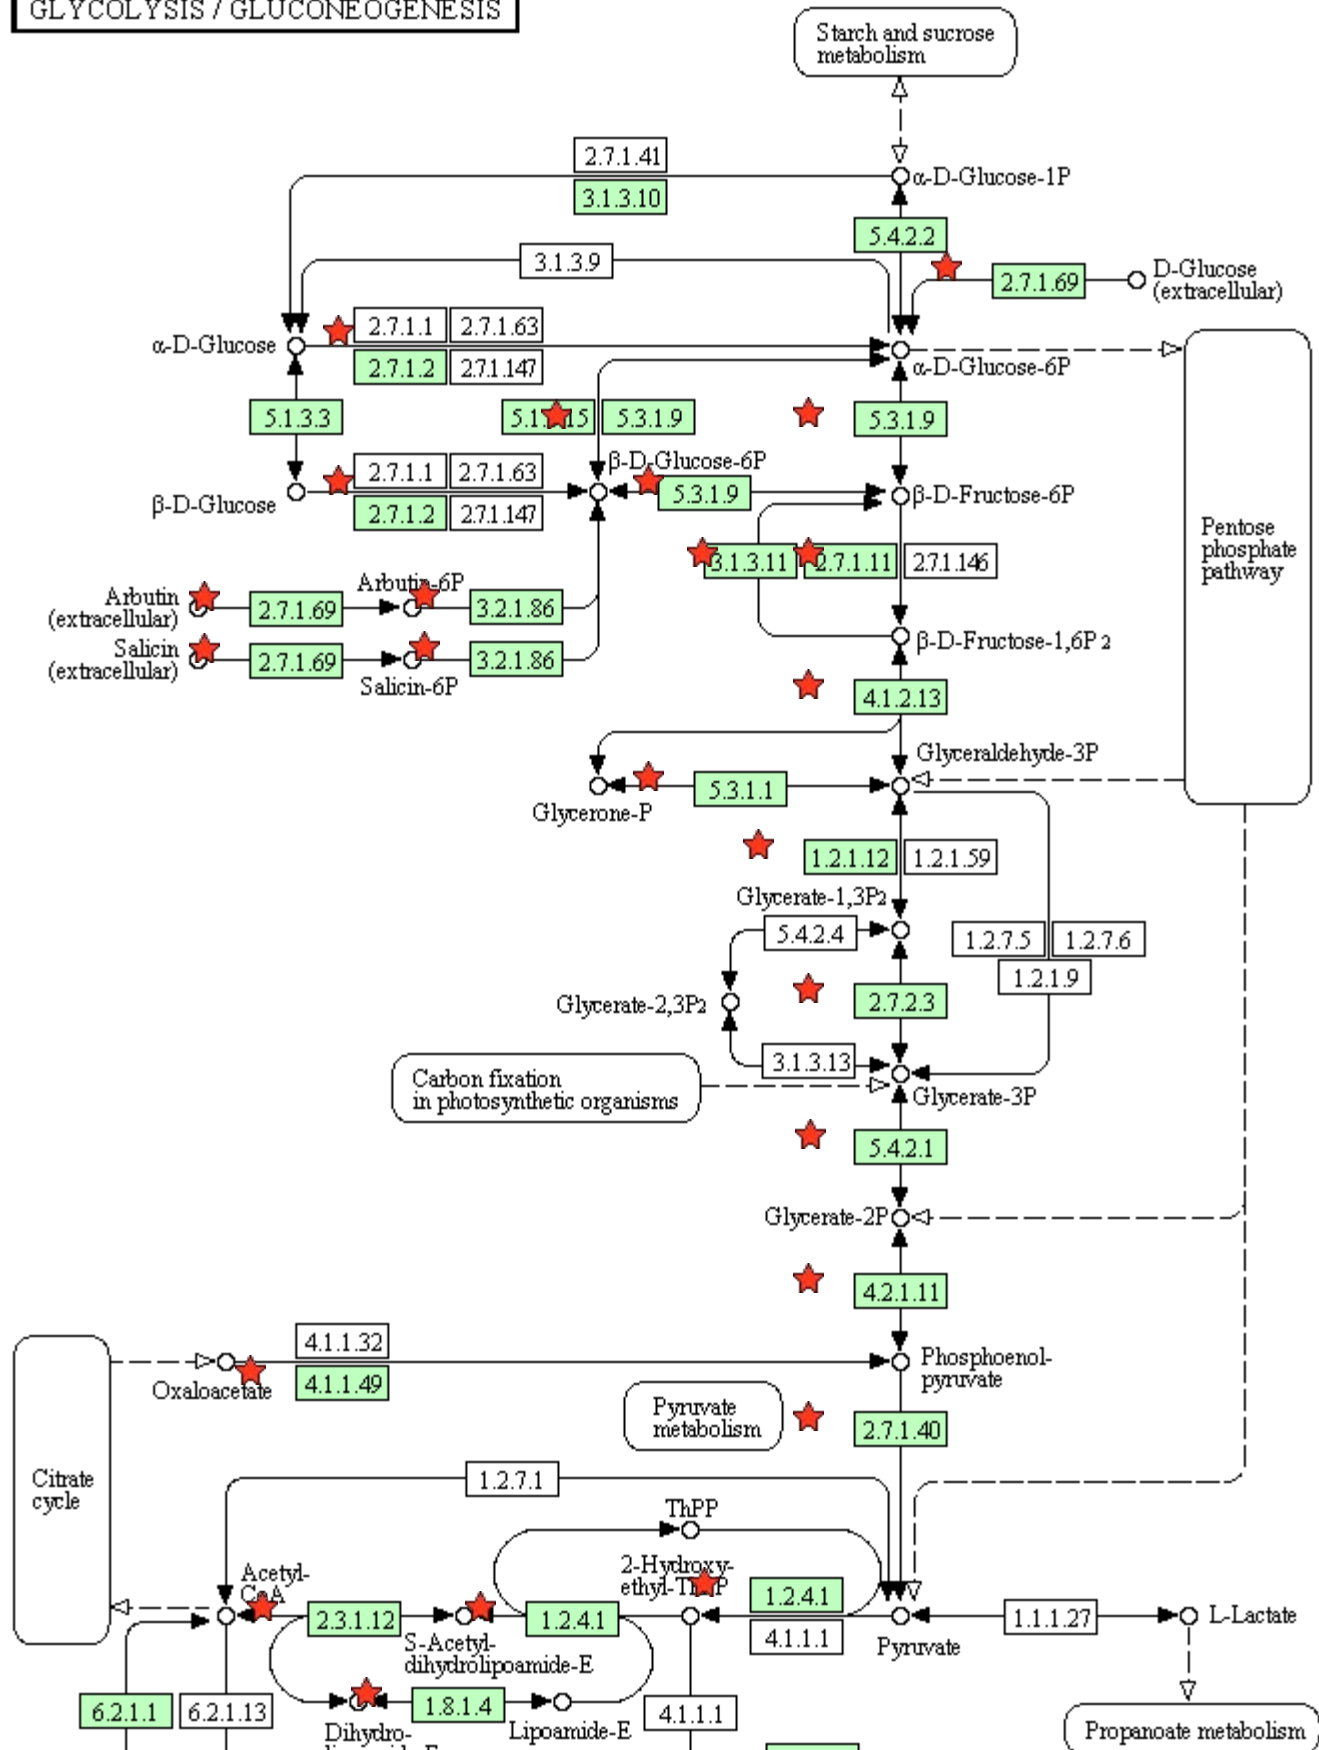

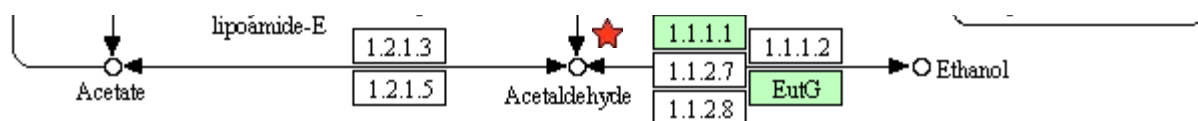

00010 5/31/12  
(c) Kanehisa Laboratories

List genes are shown in red

| DAVID Gene Name                                                                                           |
|-----------------------------------------------------------------------------------------------------------|
| <a href="#">2,3-bisphosphoglycerate-dependent phosphoglycerate mutase</a>                                 |
| <a href="#">2,3-bisphosphoglycerate-independent phosphoglycerate mutase</a>                               |
| <a href="#">6-phospho-beta-glucosidase ascB</a>                                                           |
| <a href="#">6-phospho-beta-glucosidase bglA</a>                                                           |
| <a href="#">6-phospho-beta-glucosidase bglB</a>                                                           |
| <a href="#">6-phospho-beta-glucosidase</a>                                                                |
| <a href="#">6-phosphofructokinase isozyme 2</a>                                                           |
| <a href="#">6-phosphofructokinase; 6-phosphofructokinase isozyme 1</a>                                    |
| <a href="#">Acetyl-coenzyme A synthetase</a>                                                              |
| <a href="#">Aldehyde-alcohol dehydrogenase</a>                                                            |
| <a href="#">Aldose 1-epimerase</a>                                                                        |
| <a href="#">Dihydrolipoyl dehydrogenase</a>                                                               |
| <a href="#">Dihydrolipoyllysine-residue acetyltransferase component of pyruvate dehydrogenase complex</a> |
| <a href="#">Enolase</a>                                                                                   |
| <a href="#">Ethanolamine utilization protein eutG</a>                                                     |
| <a href="#">Fructose-1,6-bisphosphatase class 1</a>                                                       |
| <a href="#">Fructose-1,6-bisphosphatase class 2</a>                                                       |
| <a href="#">Fructose-bisphosphate aldolase class 1</a>                                                    |
| <a href="#">Fructose-bisphosphate aldolase class 2</a>                                                    |
| <a href="#">Glucokinase</a>                                                                               |
| <a href="#">Glucose-1-phosphatase</a>                                                                     |
| <a href="#">Glucose-6-phosphate isomerase</a>                                                             |
| <a href="#">Glucose-specific phosphotransferase enzyme IIA component</a>                                  |
| <a href="#">Glyceraldehyde-3-phosphate dehydrogenase A</a>                                                |
| <a href="#">PTS system arbutin-, cellobiose-, and salicin-specific EIIBC component</a>                    |
| <a href="#">PTS system glucose-specific EIICB component</a>                                               |
| <a href="#">PTS system maltose- and glucose-specific EIICB component</a>                                  |
| <a href="#">Phosphoenolpyruvate carboxykinase [ATP]</a>                                                   |
| <a href="#">Phosphoglucomutase</a>                                                                        |
| <a href="#">Phosphoglycerate kinase</a>                                                                   |
| <a href="#">Probable phosphoglycerate mutase gpmB</a>                                                     |
| <a href="#">Pyruvate dehydrogenase E1 component</a>                                                       |
| <a href="#">Pyruvate kinase I; Pyruvate kinase</a>                                                        |
| <a href="#">Pyruvate kinase II; Pyruvate kinase</a>                                                       |
| <a href="#">S-(hydroxymethyl)glutathione dehydrogenase</a>                                                |
| <a href="#">Triosephosphate isomerase</a>                                                                 |





[DNA polymerase III subunit delta'](#)  
[DNA polymerase III subunit epsilon](#)  
[DNA polymerase III subunit psi](#)  
[DNA polymerase III subunit tau](#)  
[DNA polymerase III subunit theta](#)  
[DNA-directed RNA polymerase subunit alpha](#)  
[DNA-directed RNA polymerase subunit beta](#)  
[DNA-directed RNA polymerase subunit omega](#)  
[DNA-directed RNA polymerase: DNA-directed RNA polymerase subunit beta'](#)  
[Deoxycytidine triphosphate deaminase](#)  
[Deoxyuridine 5'-triphosphate nucleotidohydrolase](#)  
[Dihydroorotate](#)  
[Dihydroorotate dehydrogenase](#)  
[ECs5191: ECP\\_4467: ECSE\\_4519: EcSMS35\\_4692: ECUMN\\_4750: Z5824: EcolC\\_3793: ECS88\\_4807: E2348C\\_4544: EC55989\\_4773: ECDH10B\\_4408: ECED1\\_5072: ECH74115\\_5730: ECIAI1\\_4447: b4213: ECIAI39\\_4685: UTI89\\_C4822: EcHS\\_A4467: APECO1\\_2173: EcE24377A\\_4783](#)  
[Multifunctional protein surE](#)  
[Nucleoside diphosphate kinase](#)  
[Orotate phosphoribosyltransferase](#)  
[Orotidine 5'-phosphate decarboxylase](#)  
[Polyribonucleotide nucleotidyltransferase](#)  
[Protein mazG](#)  
[Protein ushA](#)  
[Purine nucleoside phosphorylase deoD-type](#)  
[Pyrimidine-specific ribonucleoside hydrolase rihB](#)  
[Ribonucleoside-diphosphate reductase 1 subunit beta](#)  
[Ribonucleoside-diphosphate reductase 2 subunit beta](#)  
[Ribonucleoside-diphosphate reductase: Ribonucleoside-diphosphate reductase 1 subunit alpha](#)  
[Ribonucleoside-diphosphate reductase: Ribonucleoside-diphosphate reductase 2 subunit alpha](#)  
[Thioredoxin reductase](#)  
[Thymidine kinase](#)  
[Thymidine phosphorylase](#)  
[Thymidylate kinase](#)  
[Thymidylate synthase](#)  
[UPF0207 protein yfbR: 5'-nucleotidase yfbR](#)  
[Uracil phosphoribosyltransferase](#)  
[Uridine kinase](#)  
[Uridine phosphorylase](#)  
[Uridylate kinase](#)

# Supplemental Figure S2 F

Pathway: Pyruvate metabolism

Pathway information generated by [KEGG](http://www.kegg.jp/).

Stop Blinking

Help

## ★ PYRUVATE METABOLISM

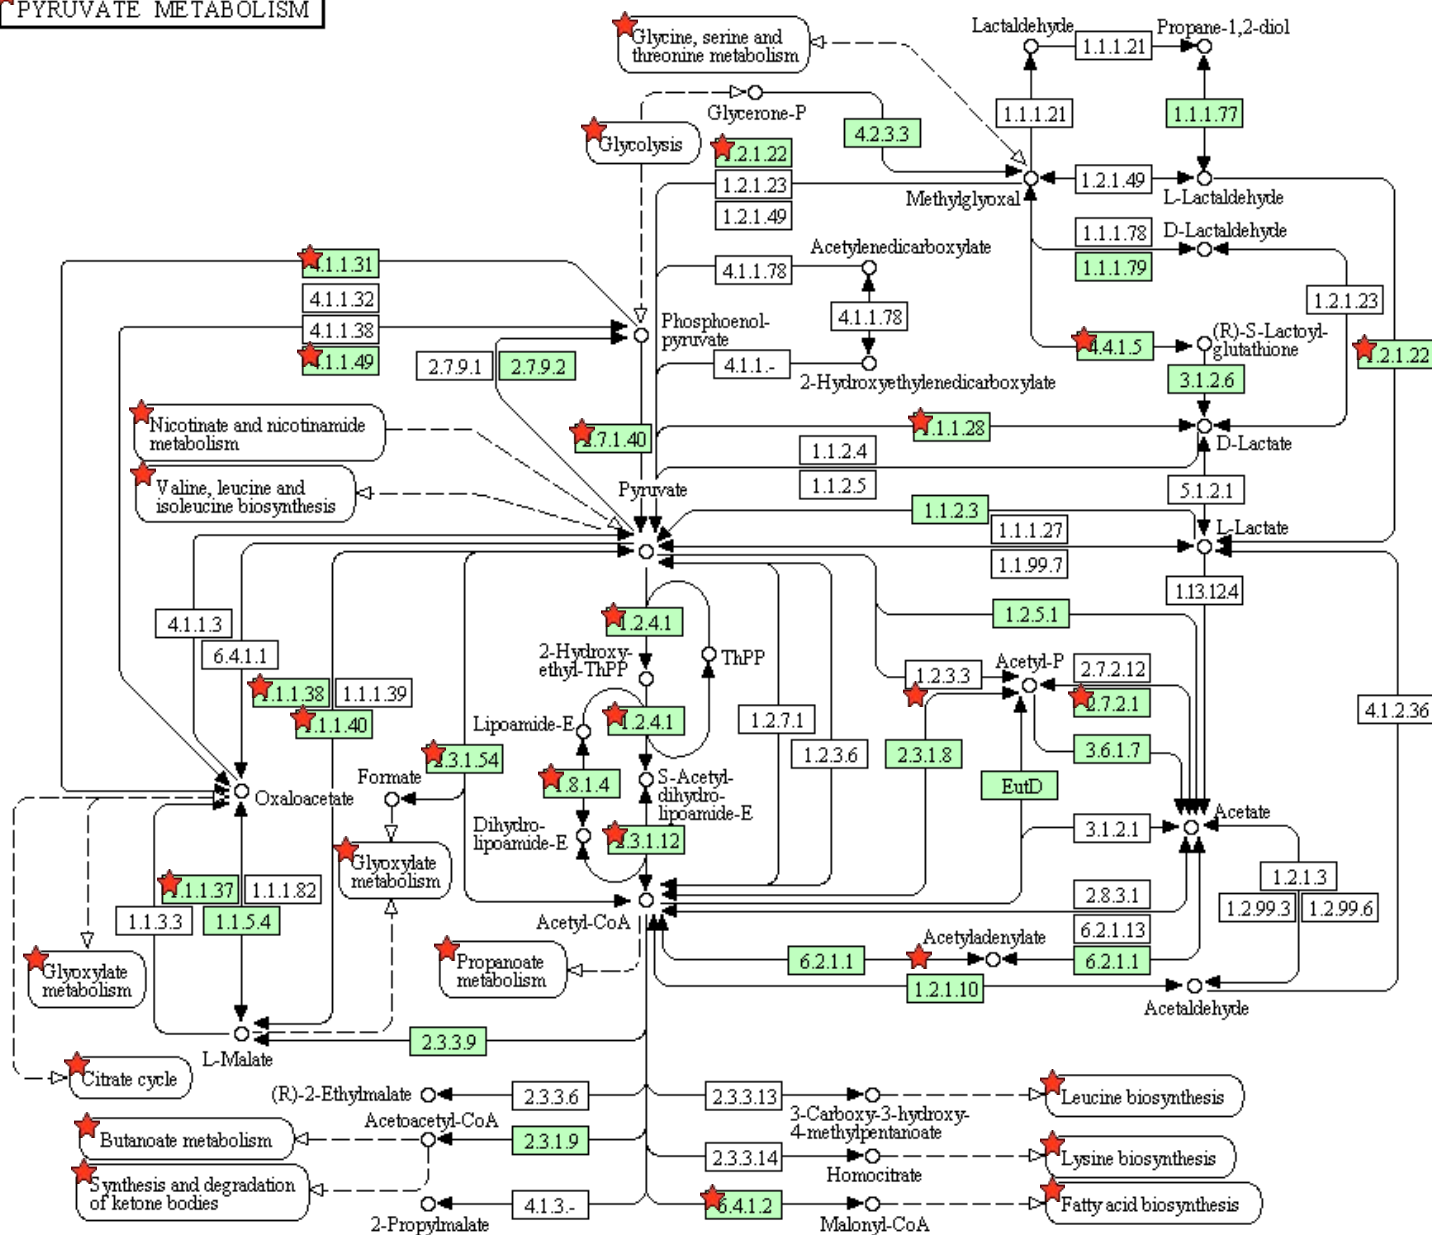

00620 6/6/12  
(c) Kanehisa Laboratories

List genes are shown in red

| DAVID Gene Name                                                                                           |
|-----------------------------------------------------------------------------------------------------------|
| <a href="#">Acetate kinase</a>                                                                            |
| <a href="#">Acetyl-CoA acetyltransferase</a>                                                              |
| <a href="#">Acetyl-coenzyme A carboxylase carboxyl transferase subunit alpha</a>                          |
| <a href="#">Acetyl-coenzyme A carboxylase carboxyl transferase subunit beta</a>                           |
| <a href="#">Acetyl-coenzyme A synthetase</a>                                                              |
| <a href="#">Acylphosphatase</a>                                                                           |
| <a href="#">Aldehyde-alcohol dehydrogenase</a>                                                            |
| <a href="#">Biotin carboxyl carrier protein of acetyl-CoA carboxylase</a>                                 |
| <a href="#">Biotin carboxylase</a>                                                                        |
| <a href="#">D-lactate dehydrogenase</a>                                                                   |
| <a href="#">D-lactate dehydrogenase</a>                                                                   |
| <a href="#">Dihydrolipoyl dehydrogenase</a>                                                               |
| <a href="#">Dihydrolipoyllysine-residue acetyltransferase component of pyruvate dehydrogenase complex</a> |
| <a href="#">Ethanolamine utilization protein eutE</a>                                                     |
| <a href="#">Formate acetyltransferase 1</a>                                                               |

|                                                                                       |
|---------------------------------------------------------------------------------------|
| <a href="#">Formate acetyltransferase 2</a>                                           |
| <a href="#">Glyoxylate/hydroxypyruvate reductase A</a>                                |
| <a href="#">Hydroxyacylglutathione hydrolase</a>                                      |
| <a href="#">Keto-acid formate acetyltransferase</a>                                   |
| <a href="#">L-lactate dehydrogenase [cytochrome]</a>                                  |
| <a href="#">Lactaldehyde dehydrogenase</a>                                            |
| <a href="#">Lactaldehyde reductase</a>                                                |
| <a href="#">Lactoylglutathione lyase</a>                                              |
| <a href="#">Malate dehydrogenase</a>                                                  |
| <a href="#">Malate synthase A: Malate synthase</a>                                    |
| <a href="#">Malate synthase G</a>                                                     |
| <a href="#">Malate:quinone oxidoreductase: Probable malate:quinone oxidoreductase</a> |
| <a href="#">Methylglyoxal synthase</a>                                                |
| <a href="#">NAD-dependent malic enzyme</a>                                            |
| <a href="#">NADP-dependent malic enzyme</a>                                           |
| <a href="#">Phosphate acetyltransferase</a>                                           |
| <a href="#">Phosphoenolpyruvate carboxykinase [ATP]</a>                               |
| <a href="#">Phosphoenolpyruvate carboxylase</a>                                       |
| <a href="#">Phosphoenolpyruvate synthase</a>                                          |
| <a href="#">Probable acetyl-CoA acetyltransferase</a>                                 |
| <a href="#">Putative formate acetyltransferase 3</a>                                  |
| <a href="#">Pyruvate dehydrogenase E1 component</a>                                   |
| <a href="#">Pyruvate dehydrogenase [cytochrome]</a>                                   |
| <a href="#">Pyruvate kinase I: Pyruvate kinase</a>                                    |
| <a href="#">Pyruvate kinase II: Pyruvate kinase</a>                                   |
| <a href="#">Uncharacterized oxidoreductase ybiC</a>                                   |

# Supplemental Figure S1 G

Pathway: Pentose phosphate pathway

Pathway information generated by KEGG.

Stop Blinking

Help

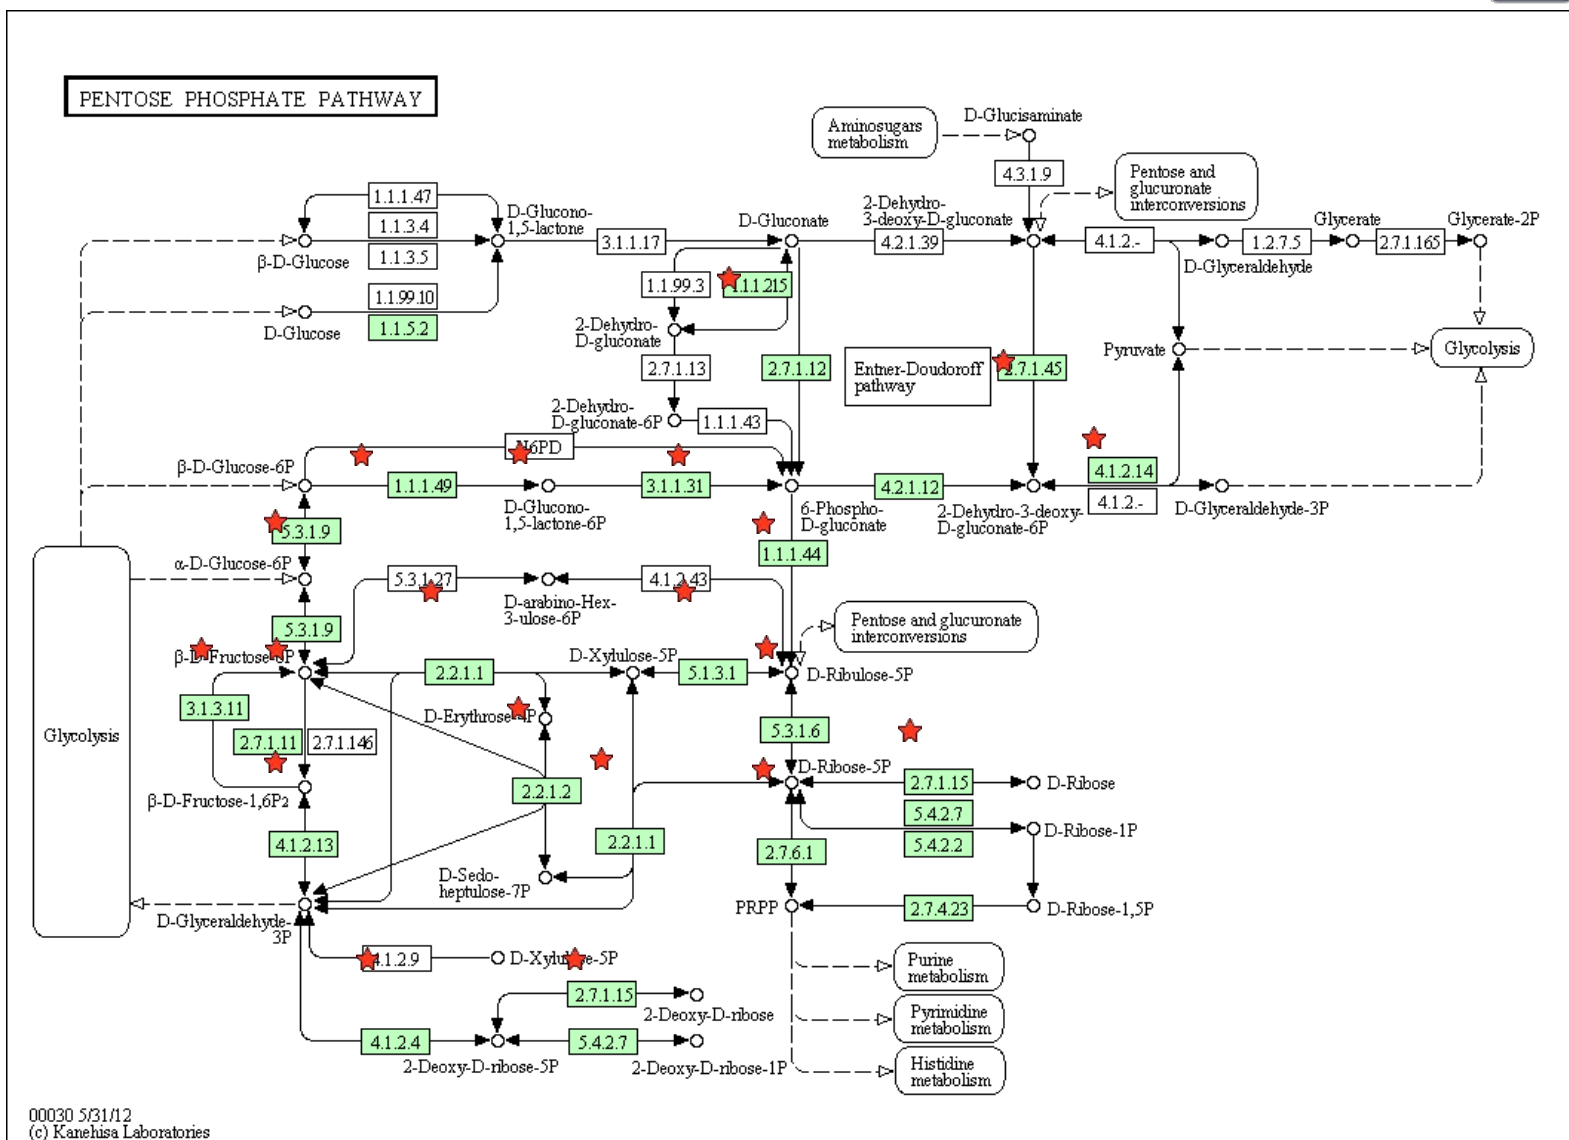

List genes are shown in red

| DAVID Gene Name                                                         |
|-------------------------------------------------------------------------|
| <a href="#">2-dehydro-3-deoxygluconokinase</a>                          |
| <a href="#">6-phosphofruktokinase isozyyme 2</a>                        |
| <a href="#">6-phosphofruktokinase: 6-phosphofruktokinase isozyyme 1</a> |
| <a href="#">6-phosphogluconate dehydrogenase, decarboxylating</a>       |
| <a href="#">6-phosphogluconolactonase</a>                               |
| <a href="#">ATP-binding protein phnN</a>                                |
| <a href="#">Deoxyribose-phosphate aldolase</a>                          |
| <a href="#">Fructose-1,6-bisphosphatase class 1</a>                     |
| <a href="#">Fructose-1,6-bisphosphatase class 2</a>                     |
| <a href="#">Fructose-bisphosphate aldolase class 1</a>                  |
| <a href="#">Fructose-bisphosphate aldolase class 2</a>                  |
| <a href="#">Glucose-6-phosphate 1-dehydrogenase</a>                     |
| <a href="#">Glucose-6-phosphate isomerase</a>                           |
| <a href="#">Glyoxylate/hydroxypyruvate reductase B</a>                  |
| <a href="#">KHG/KDPG aldolase</a>                                       |
| <a href="#">Phosphoglucomutase</a>                                      |
| <a href="#">Phosphogluconate dehydratase</a>                            |
| <a href="#">Phosphopentomutase</a>                                      |
| <a href="#">Quinoprotein glucoase dehydrogenase</a>                     |
| <a href="#">Ribokinase</a>                                              |
| <a href="#">Ribose-5-phosphate isomerase A</a>                          |
| <a href="#">Ribose-5-phosphate isomerase B</a>                          |
| <a href="#">Ribose-phosphate pyrophosphokinase</a>                      |
| <a href="#">Ribulose-phosphate 3-epimerase</a>                          |
| <a href="#">Thermoresistant gluconokinase</a>                           |
| <a href="#">Thermosensitive gluconokinase</a>                           |
| <a href="#">Transaldolase A: Transaldolase</a>                          |
| <a href="#">Transaldolase B: Transaldolase</a>                          |
| <a href="#">Transketolase 1</a>                                         |

[Transketolase 2](#)

# Supplemental Figure S2 H

Pathway: Citrate cycle (TCA cycle)

Pathway information generated by [KEGG](http://www.kegg.jp/).

Stop Blinking

Help

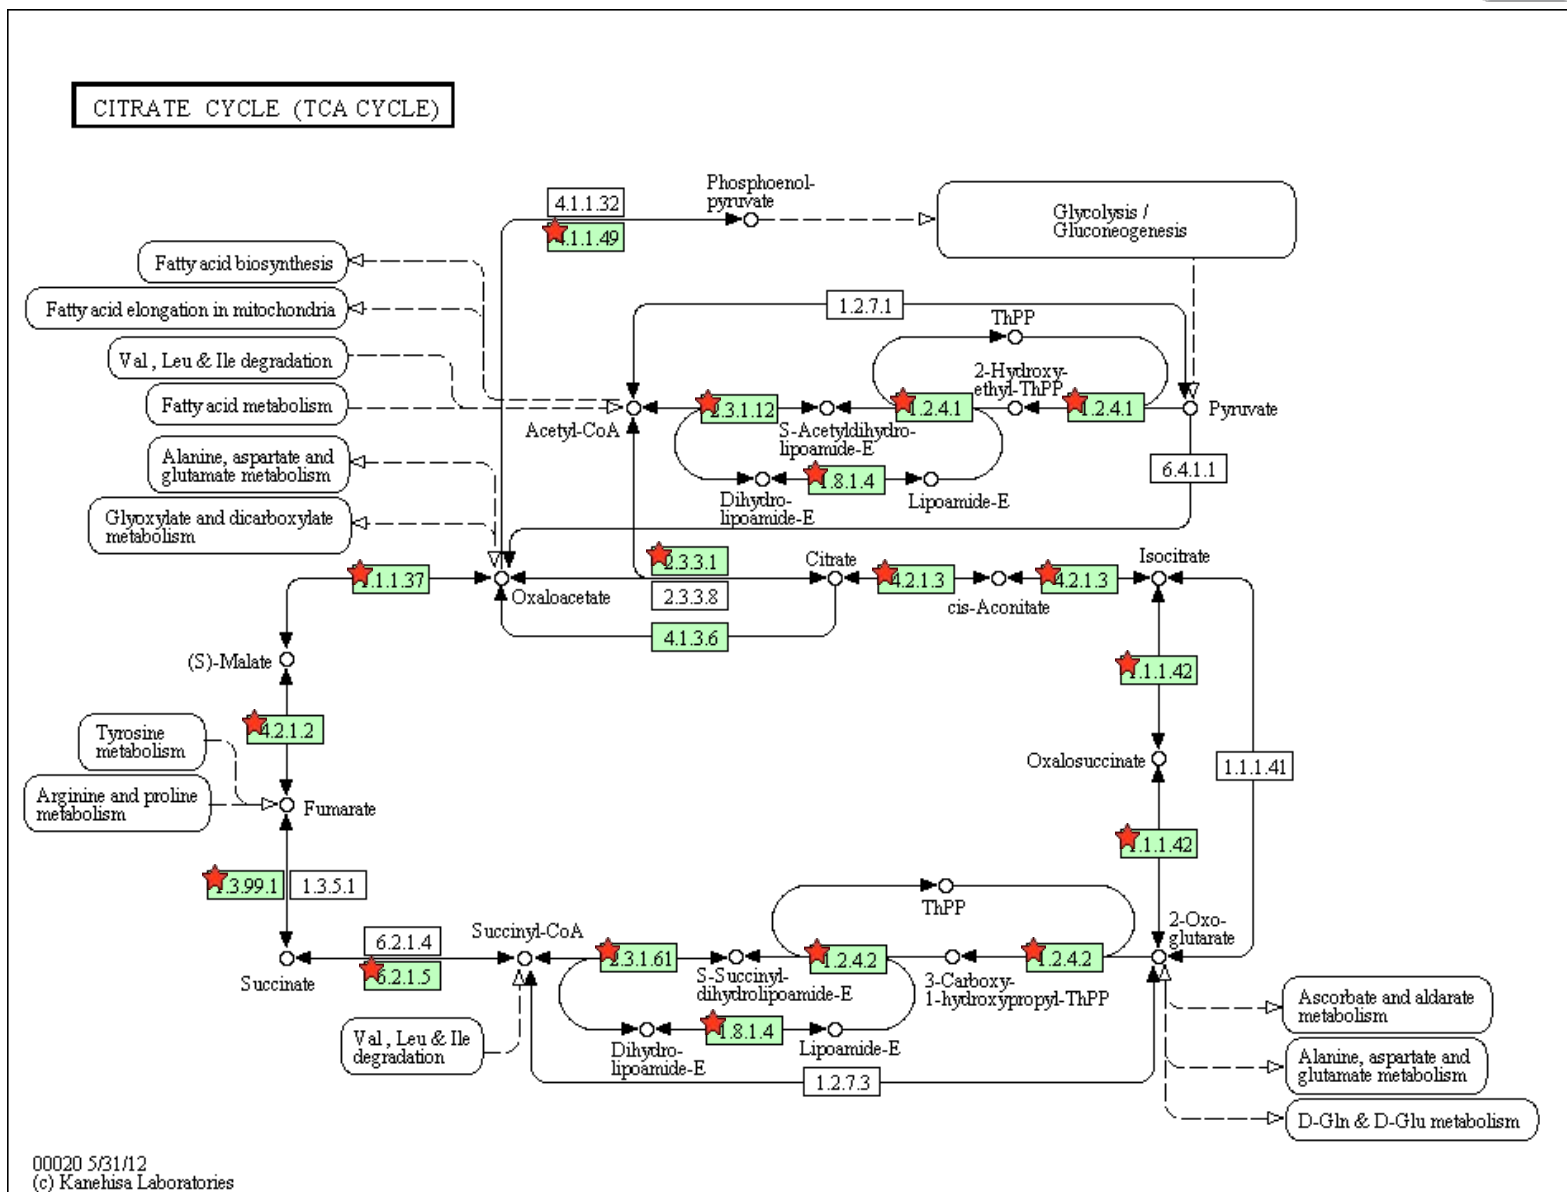

List genes are shown in red

| DAVID Gene Name                                                                                                    |
|--------------------------------------------------------------------------------------------------------------------|
| <a href="#">2-oxoglutarate dehydrogenase E1 component.</a>                                                         |
| <a href="#">Aconitate hydratase 1.</a>                                                                             |
| <a href="#">Aconitate hydratase 2.</a>                                                                             |
| <a href="#">Citrate lyase acyl carrier protein.</a>                                                                |
| <a href="#">Citrate lyase alpha chain.</a>                                                                         |
| <a href="#">Citrate lyase subunit beta.</a>                                                                        |
| <a href="#">Citrate synthase.</a>                                                                                  |
| <a href="#">Dihydrolipoyl dehydrogenase.</a>                                                                       |
| <a href="#">Dihydrolipoyllysine-residue acetyltransferase component of pyruvate dehydrogenase complex.</a>         |
| <a href="#">Dihydrolipoyllysine-residue succinyltransferase component of 2-oxoglutarate dehydrogenase complex.</a> |
| <a href="#">Fumarate hydratase class I, aerobic.</a>                                                               |
| <a href="#">Fumarate hydratase class I, anaerobic.</a>                                                             |
| <a href="#">Fumarate hydratase class II.</a>                                                                       |
| <a href="#">Fumarate reductase flavoprotein subunit.</a>                                                           |
| <a href="#">Fumarate reductase subunit C.</a>                                                                      |
| <a href="#">Fumarate reductase subunit D.</a>                                                                      |
| <a href="#">Isocitrate dehydrogenase [NADP].</a>                                                                   |
| <a href="#">Malate dehydrogenase.</a>                                                                              |
| <a href="#">Phosphoenolpyruvate carboxykinase [ATP].</a>                                                           |
| <a href="#">Pyruvate dehydrogenase E1 component.</a>                                                               |
| <a href="#">Succinate dehydrogenase cytochrome b556 subunit.</a>                                                   |
| <a href="#">Succinate dehydrogenase flavoprotein subunit.</a>                                                      |
| <a href="#">Succinate dehydrogenase hydrophobic membrane anchor subunit.</a>                                       |

|                                                                 |
|-----------------------------------------------------------------|
| <a href="#">Succinate dehydrogenase iron-sulfur subunit</a>     |
| <a href="#">Succinyl-CoA ligase [ADP-forming] subunit alpha</a> |
| <a href="#">Succinyl-CoA ligase [ADP-forming] subunit beta</a>  |
| <a href="#">Uncharacterized oxidoreductase ybiC</a>             |
| <a href="#">Uncharacterized protein ybh</a>                     |

# Supplemental Figure S2 I

Pathway: Glutathione metabolism

Pathway information generated by [KEGG](#).

Stop Blinking

Help

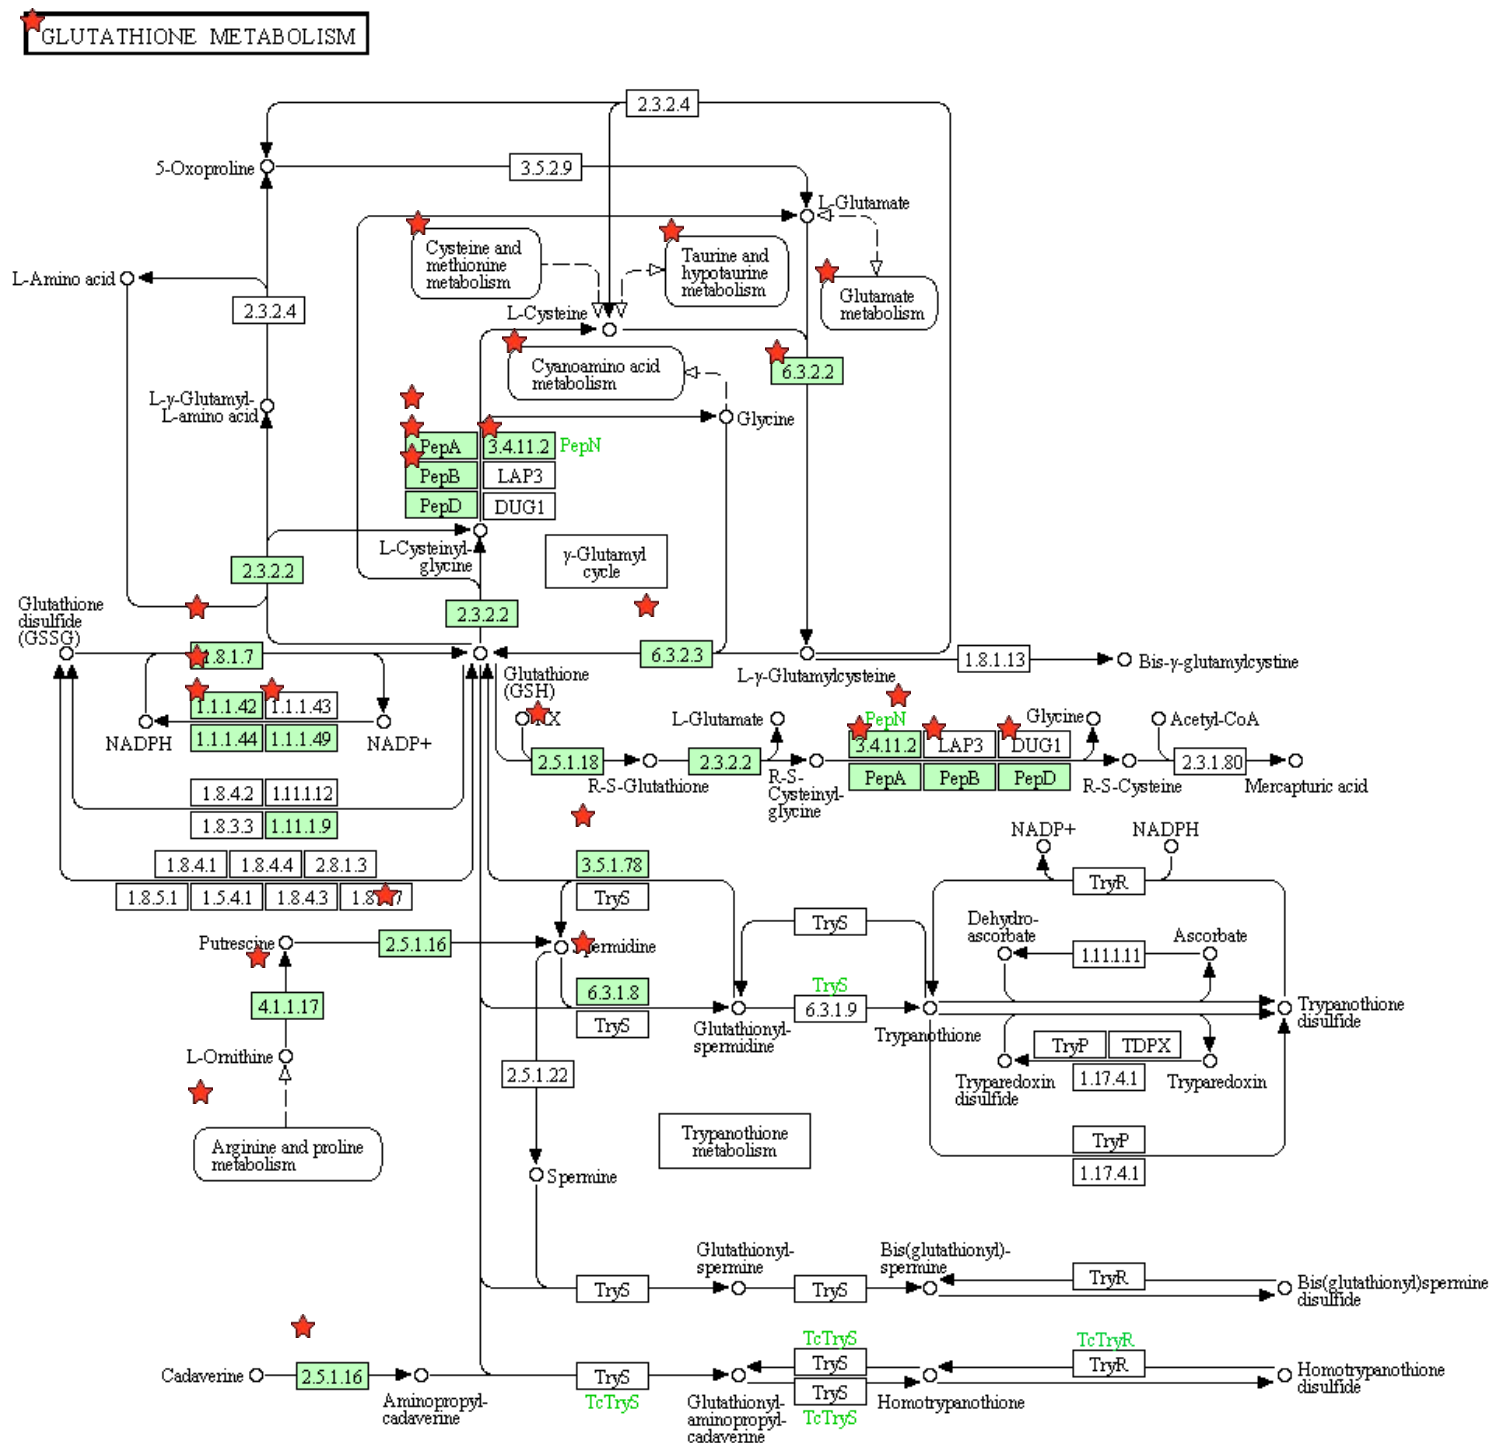

00480 6/4/12  
(c) Kanehisa Laboratories

List genes are shown in red

| DAVID Gene Name                                                                                          |
|----------------------------------------------------------------------------------------------------------|
| <a href="#">6-phosphogluconate dehydrogenase, decarboxylating</a>                                        |
| <a href="#">Aminoacyl-histidine dipeptidase</a>                                                          |
| <a href="#">Aminopeptidase N</a>                                                                         |
| <a href="#">EC1A139 3484: EC1A1 3137: EC55989 3404: ECUMN 3472: ECS88 3370: ECDH10B 3165: ECED1 3638</a> |
| <a href="#">Gamma-glutamyltranspeptidase</a>                                                             |
| <a href="#">Glucose-6-phosphate 1-dehydrogenase</a>                                                      |
| <a href="#">Glutamate--cysteine ligase</a>                                                               |
| <a href="#">Glutathione S-transferase</a>                                                                |
| <a href="#">Glutathione reductase</a>                                                                    |
| <a href="#">Glutathione synthetase</a>                                                                   |



|                                                                                        |
|----------------------------------------------------------------------------------------|
| <a href="#">Isocitrate dehydrogenase [NADP]</a>                                        |
| <a href="#">Ornithine decarboxylase, constitutive</a>                                  |
| <a href="#">Ornithine decarboxylase, inducible</a>                                     |
| <a href="#">Peptidase B</a>                                                            |
| <a href="#">Probable cytosol aminopeptidase: Cytosol aminopeptidase</a>                |
| <a href="#">Spermidine synthase</a>                                                    |
| <a href="#">Vitamin B12 transport periplasmic protein btuE: Glutathione peroxidase</a> |

# Supplemental Figure S2 J

Pathway: Fatty acid biosynthesis

Pathway information generated by [KEGG](#).

Stop Blinking

Help

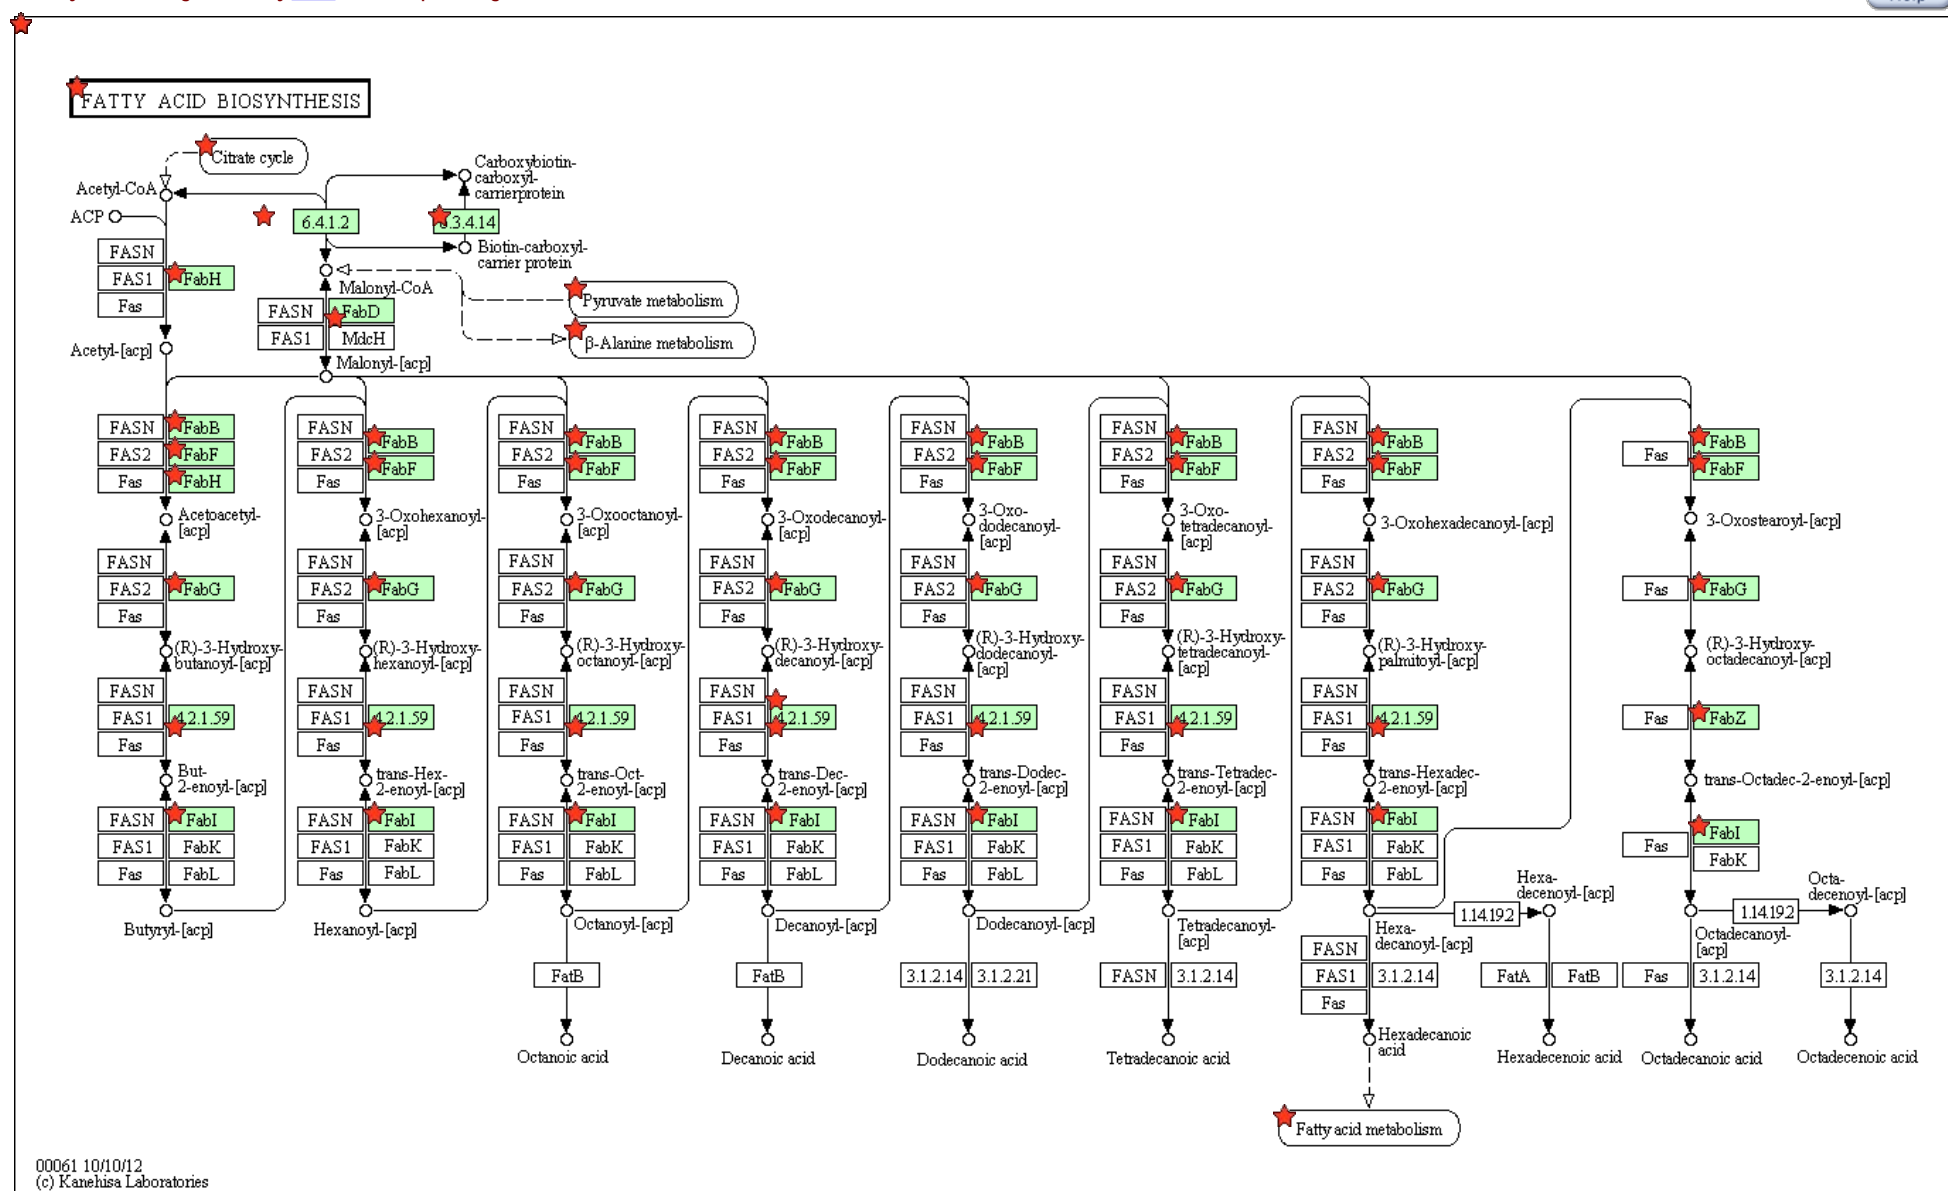

00061 10/10/12  
(c) Kanehisa Laboratories

List genes are shown in red

| DAVID Gene Name                                                                  |
|----------------------------------------------------------------------------------|
| <a href="#">(3R)-hydroxymyristoyl-[acyl-carrier-protein] dehydratase</a>         |
| <a href="#">3-hydroxydecanoyl-[acyl-carrier-protein] dehydratase</a>             |
| <a href="#">3-oxoacyl-[acyl-carrier-protein] reductase</a>                       |
| <a href="#">3-oxoacyl-[acyl-carrier-protein] synthase 1</a>                      |
| <a href="#">3-oxoacyl-[acyl-carrier-protein] synthase 2</a>                      |
| <a href="#">3-oxoacyl-[acyl-carrier-protein] synthase 3</a>                      |
| <a href="#">Acetyl-coenzyme A carboxylase carboxyl transferase subunit alpha</a> |
| <a href="#">Acetyl-coenzyme A carboxylase carboxyl transferase subunit beta</a>  |
| <a href="#">Biotin carboxyl carrier protein of acetyl-CoA carboxylase</a>        |
| <a href="#">Biotin carboxylase</a>                                               |

[Enoyl-\[acyl-carrier-protein\] reductase \[NADH\]](#)

[Malonyl CoA-acyl carrier protein transacylase](#)

# Supplemental Figure S3

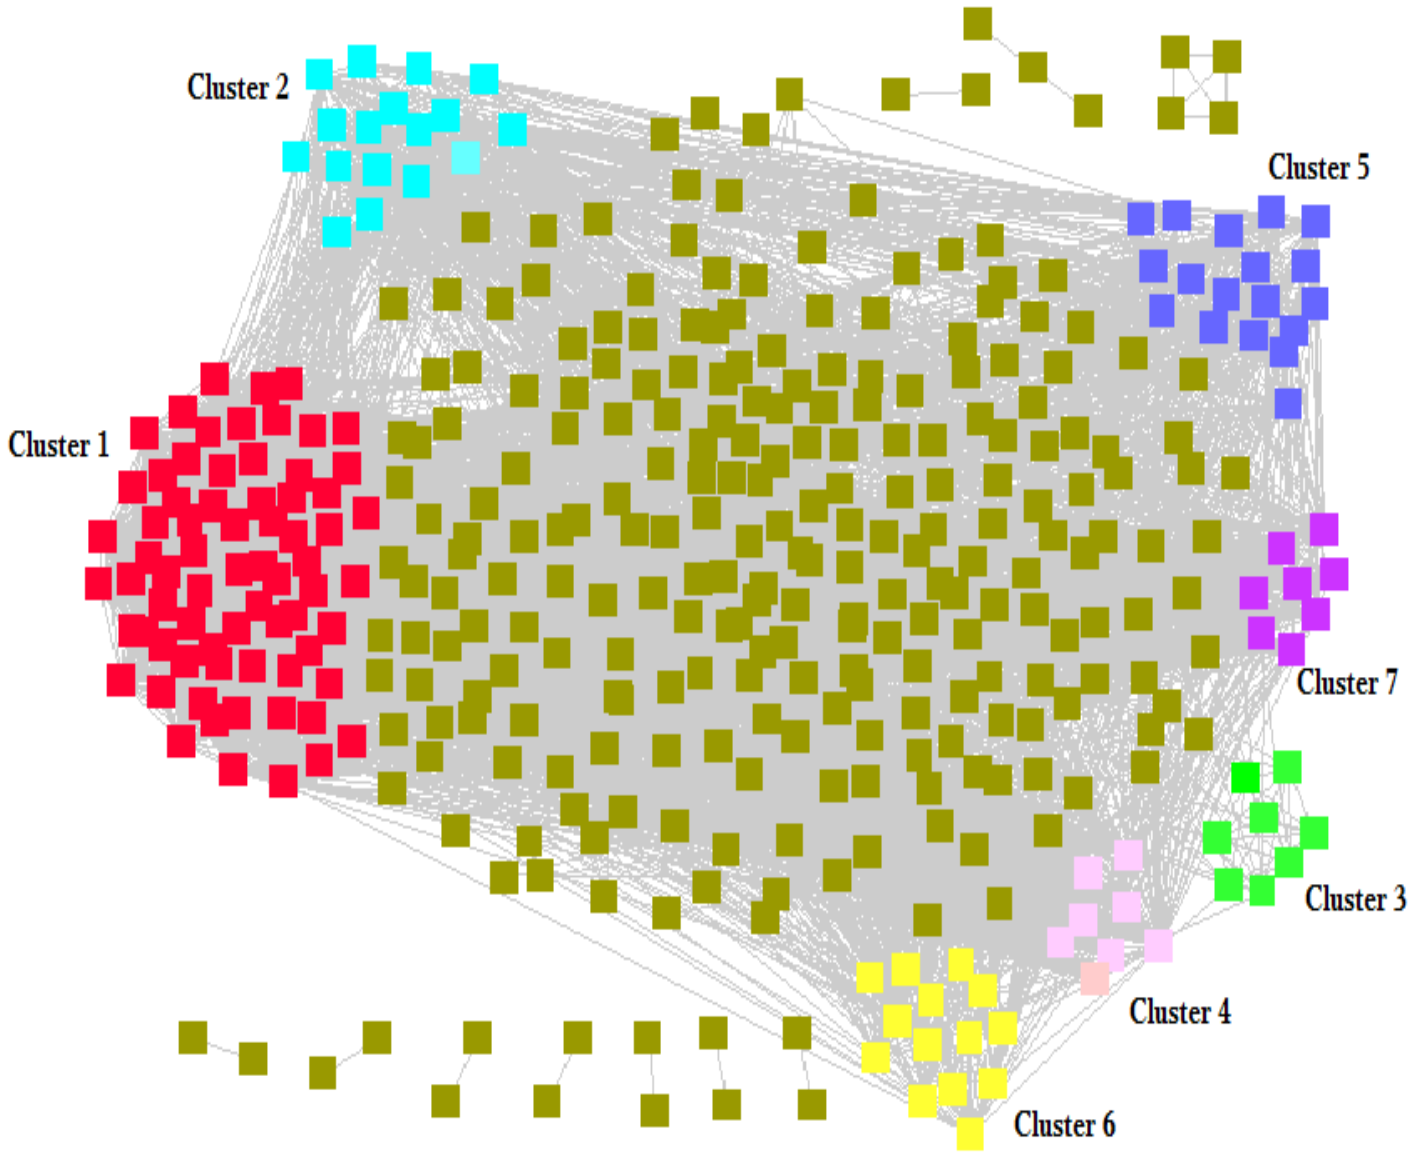

# Supplemental Figure S4

**A**

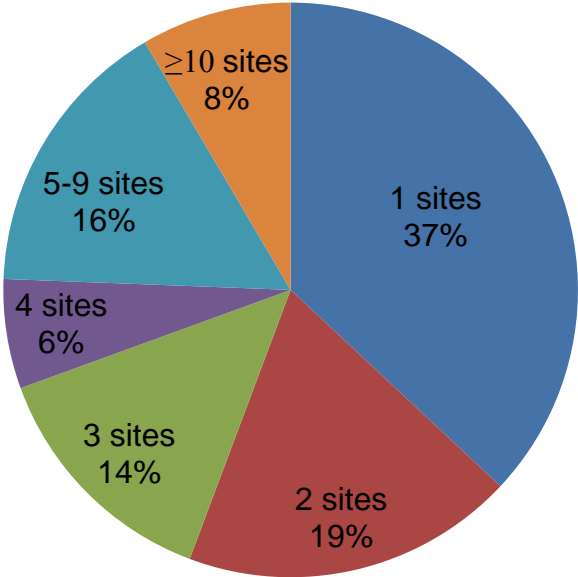

**B**

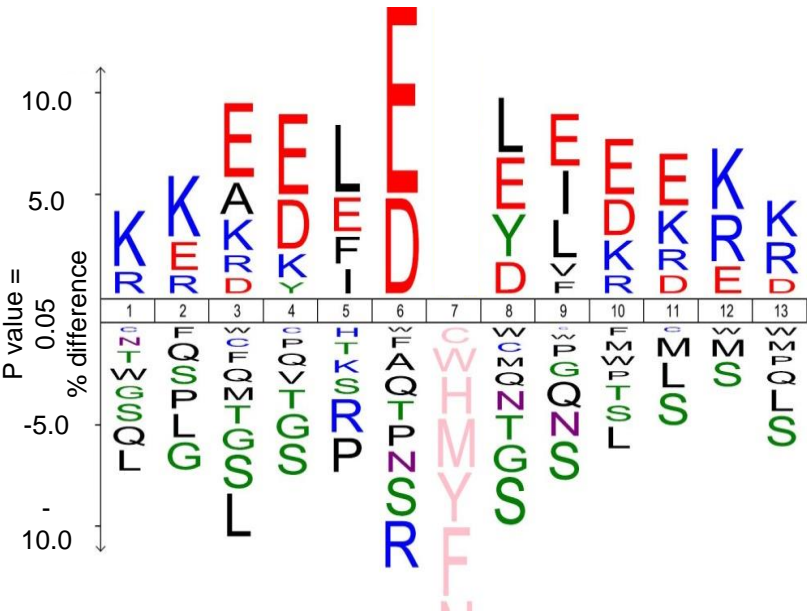

# Supplemental Figure S5

**A**

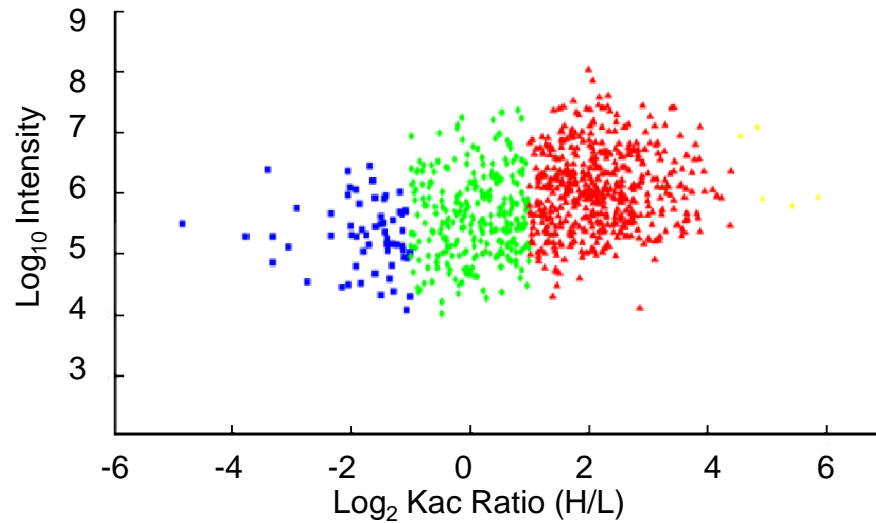

**B**

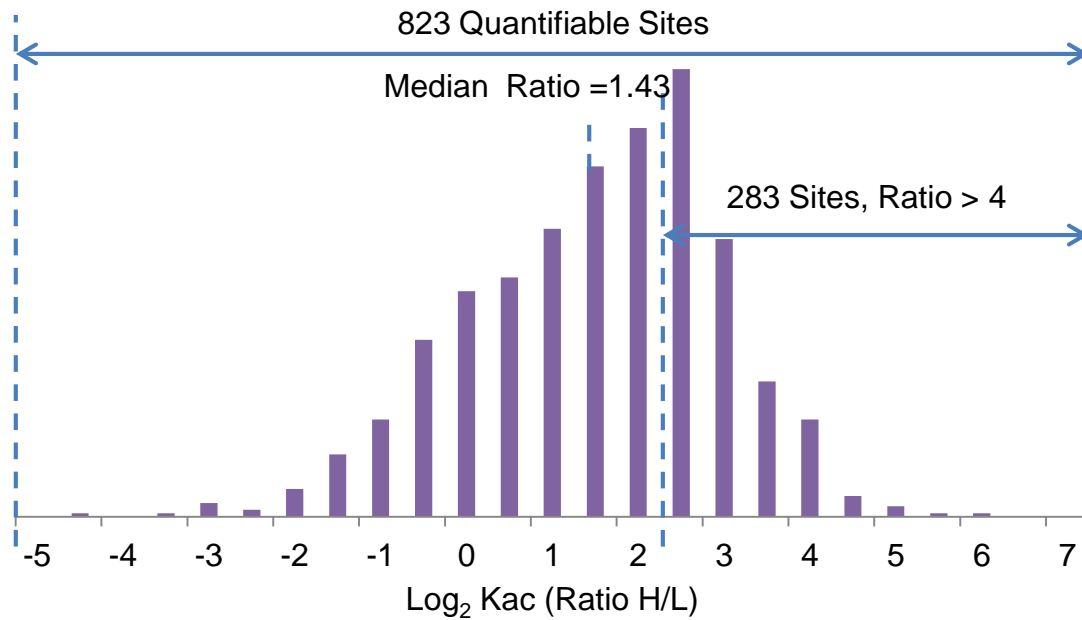

# Supplemental Figure S6

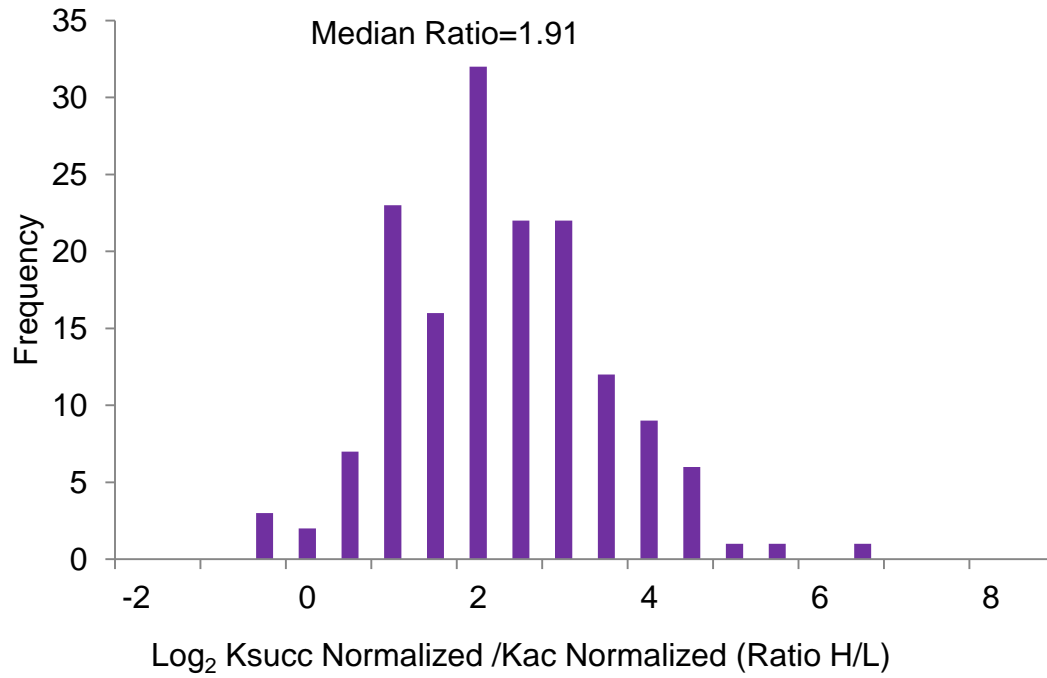

# Supplemental Figure S7

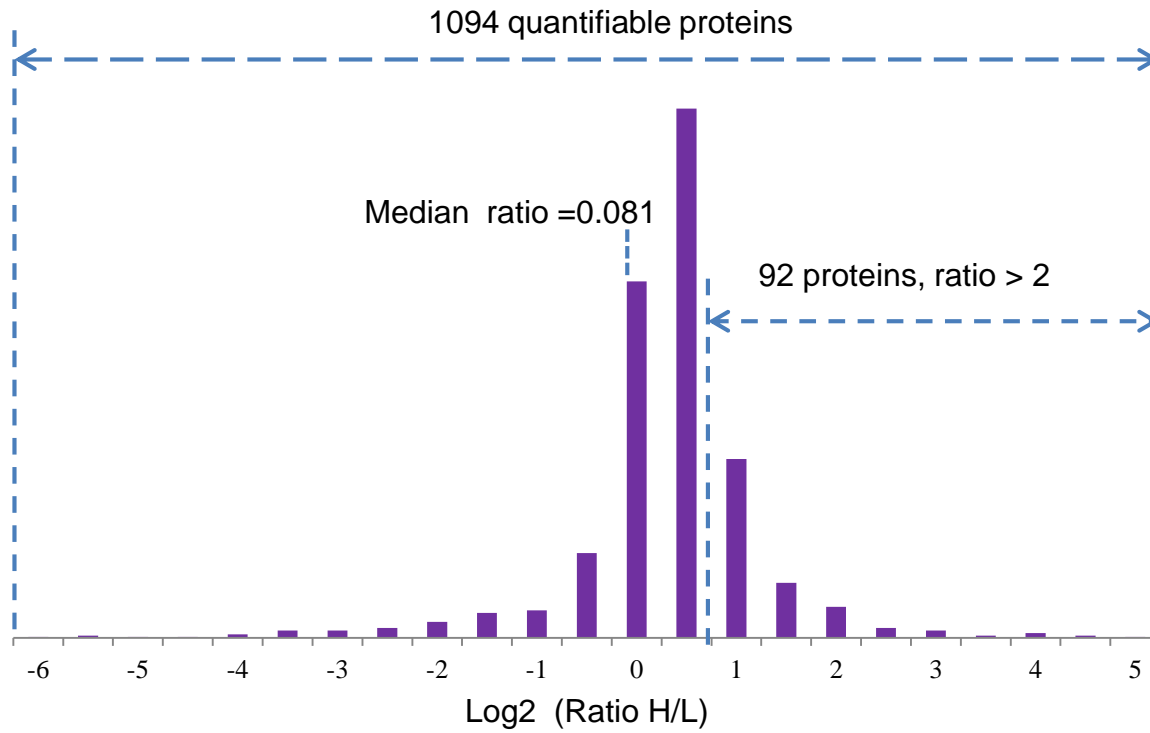

Supplement: supp_M113.031567_Supplemental_Information_and_Figures_MCP_M113.031567.pdf [file supp_M113.031567_Supplemental_Information_and_Figures_MCP_M113.031567.pdf]
